# Supplementary material
Source: PubMed Central journal article supplement (PMC2944507)
Supplement: supp_192_19_4859__2.pdf [file supp_192_19_4859__2.pdf]

## **Supplementary File 2. Statistically processed spectral count and protein summed intensity values obtained for Hendrickson *et al.***

For details of how these values were calculated, significance cut-offs, color-coding, *etc.* see the proteomic methods in Supplementary File1.

This PDF file is based on a FileMaker™ database maintained in an electronic archive hosted by the Department of Microbiology at the University of Washington. Readers with access to FileMaker™ Ver. 10 or above who wish to use the database in its native format should contact [mhackett@u.washington.edu](mailto:mhackett@u.washington.edu).

| ORF             | AM/OH <i>M. Flagellatus</i> Spectral Count                                                                  |                      |                   |                 |                |            | AM/OH <i>M. Flagellatus</i> Protein Intensity |                      |                   |                 |                |                        | Consensus | Spectral Count |   | Protein Intensity |  |
|-----------------|-------------------------------------------------------------------------------------------------------------|----------------------|-------------------|-----------------|----------------|------------|-----------------------------------------------|----------------------|-------------------|-----------------|----------------|------------------------|-----------|----------------|---|-------------------|--|
|                 | $q$ -value                                                                                                  | $\log_2$ Methylamine | $\log_2$ Methanol | $\log_2$ Sc Sum | $\log_2$ Ratio | Regulation | $q$ -value                                    | $\log_2$ Methylamine | $\log_2$ Methanol | $\log_2$ PI Sum | $\log_2$ Ratio | Log <sub>2</sub> Ratio |           | -7             | 0 | 7                 |  |
| <b>MFLA0001</b> | 1.96 E-2                                                                                                    | 5.358                | 4.648             | 6.046           | 0.710          | Y ●● Y     | 1.11 E-1                                      | 22.995               | 23.671            | 24.372          | -1.187         | Y ●                    |           |                |   |                   |  |
|                 | <i>chromosomal replication initiator protein DnaA [Methylobacillus flagellatus KT]637936882 YP_544113</i>   |                      |                   |                 |                |            |                                               |                      |                   |                 |                |                        |           |                |   |                   |  |
| <b>MFLA0002</b> |                                                                                                             | 7.702                | 7.525             | 8.616           | 0.083          | Y ●● Y     | 5.47 E-2                                      | 27.021               | 27.774            | 28.446          | -0.865         | Y ●                    |           |                |   |                   |  |
|                 | <i>" DNA polymerase III, beta subunit [Methylobacillus flagellatus KT]637936883 YP_544114 ""</i>            |                      |                   |                 |                |            |                                               |                      |                   |                 |                |                        |           |                |   |                   |  |
| <b>MFLA0003</b> | 1.15 E-10                                                                                                   | 8.560                | 9.028             | 9.813           | -0.462         | Y ●● Y     | 1.23 E-2                                      | 28.072               | 28.941            | 29.571          | -0.897         | Y ●                    |           |                |   |                   |  |
|                 | <i>" DNA gyrase, B subunit [Methylobacillus flagellatus KT]637936884 YP_544115 ""</i>                       |                      |                   |                 |                |            |                                               |                      |                   |                 |                |                        |           |                |   |                   |  |
| <b>MFLA0004</b> |                                                                                                             | 0.521                |                   | 0.521           |                | Y ●● Y     |                                               | 19.163               |                   | 19.163          |                | Y ●                    |           |                |   |                   |  |
|                 | <i>hypothetical protein [Methylobacillus flagellatus KT]637936885 YP_544116</i>                             |                      |                   |                 |                |            |                                               |                      |                   |                 |                |                        |           |                |   |                   |  |
| <b>MFLA0005</b> |                                                                                                             | 0.000                | 0.000             |                 |                | ●●         |                                               | 0.000                | 0.000             |                 |                | ●                      |           |                |   |                   |  |
|                 | <i>sulphate transporter [Methylobacillus flagellatus KT]637936886 YP_544117</i>                             |                      |                   |                 |                |            |                                               |                      |                   |                 |                |                        |           |                |   |                   |  |
| <b>MFLA0006</b> |                                                                                                             | 3.664                | 2.000             | 4.060           | 0.363          | Y ●● Y     | 1.41 E-1                                      | 21.663               | 20.961            | 22.354          | -0.332         | Y ●                    |           |                |   |                   |  |
|                 | <i>" glycoside hydrolase family 2, sugar binding [Methylobacillus flagellatus KT]637936887 YP_544118 ""</i> |                      |                   |                 |                |            |                                               |                      |                   |                 |                |                        |           |                |   |                   |  |
| <b>MFLA0007</b> |                                                                                                             | 3.328                | 1.807             | 3.759           | 1.521          | Y ●● Y     |                                               | 20.571               | 20.244            | 21.417          | 0.328          | Y ●                    |           |                |   |                   |  |
|                 | <i>cyclase/dehydrase [Methylobacillus flagellatus KT]637936888 YP_544119</i>                                |                      |                   |                 |                |            |                                               |                      |                   |                 |                |                        |           |                |   |                   |  |
| <b>MFLA0008</b> |                                                                                                             | 0.000                | 0.000             |                 |                | ●●         |                                               | 0.000                | 0.000             |                 |                | ●                      |           |                |   |                   |  |
|                 | <i>DNA-directed DNA polymerase [Methylobacillus flagellatus KT]637936889 YP_544120</i>                      |                      |                   |                 |                |            |                                               |                      |                   |                 |                |                        |           |                |   |                   |  |
| <b>MFLA0009</b> |                                                                                                             | 3.328                | 2.540             | 3.987           | 1.862          | Y ●● Y     | 7.7 E-2                                       | 21.650               | 21.635            | 22.643          | 1.094          | Y ●                    |           |                |   |                   |  |
|                 | <i>hypothetical protein [Methylobacillus flagellatus KT]637936891 YP_544121</i>                             |                      |                   |                 |                |            |                                               |                      |                   |                 |                |                        |           |                |   |                   |  |
| <b>MFLA0010</b> |                                                                                                             | 0.000                | 0.000             |                 |                | ●●         |                                               | 0.000                | 0.000             |                 |                | ●                      |           |                |   |                   |  |
|                 | <i>transport-associated [Methylobacillus flagellatus KT]637936892 YP_544122</i>                             |                      |                   |                 |                |            |                                               |                      |                   |                 |                |                        |           |                |   |                   |  |
| <b>MFLA0011</b> |                                                                                                             | 4.595                | 4.820             | 5.712           | -0.232         | Y ●● Y     | 2.28 E-1                                      | 23.099               | 23.040            | 24.070          | 0.030          | Y ●                    |           |                |   |                   |  |
|                 | <i>Malate dehydrogenase (acceptor) [Methylobacillus flagellatus KT]637936893 YP_544123</i>                  |                      |                   |                 |                |            |                                               |                      |                   |                 |                |                        |           |                |   |                   |  |
| <b>MFLA0012</b> |                                                                                                             | 2.259                | 2.797             | 3.553           | -0.486         | Y ●● Y     | 1.37 E-2                                      | 17.630               | 20.595            | 20.769          | -3.030         | Y ●                    |           |                |   |                   |  |
|                 | <i>hypothetical protein [Methylobacillus flagellatus KT]637936894 YP_544124</i>                             |                      |                   |                 |                |            |                                               |                      |                   |                 |                |                        |           |                |   |                   |  |
| <b>MFLA0013</b> |                                                                                                             | 3.901                | 5.132             | 5.644           | -0.226         | Y ●● Y     | 2.05 E-2                                      | 23.046               | 24.831            | 25.199          | -0.786         | Y ●                    |           |                |   |                   |  |
|                 | <i>Protein-methionine-S-oxide reductase [Methylobacillus flagellatus KT]637936895 YP_544125</i>             |                      |                   |                 |                |            |                                               |                      |                   |                 |                |                        |           |                |   |                   |  |
| <b>MFLA0014</b> |                                                                                                             | 0.000                | 0.000             |                 |                | ●●         |                                               | 0.000                | 0.000             |                 |                | ●                      |           |                |   |                   |  |
|                 | <i>hypothetical protein [Methylobacillus flagellatus KT]637936896 YP_544126</i>                             |                      |                   |                 |                |            |                                               |                      |                   |                 |                |                        |           |                |   |                   |  |
| <b>MFLA0015</b> |                                                                                                             |                      | 2.140             | 2.140           |                | Y ●● Y     |                                               |                      | 21.181            | 21.181          |                | Y ●                    |           |                |   |                   |  |
|                 | <i>GCN5-related N-acetyltransferase [Methylobacillus flagellatus KT]637936897 YP_544127</i>                 |                      |                   |                 |                |            |                                               |                      |                   |                 |                |                        |           |                |   |                   |  |
| <b>MFLA0016</b> | 0                                                                                                           | 10.829               | 12.337            | 12.772          | -1.500         | G ●● Y     | 1.66 E-2                                      | 29.606               | 30.689            | 31.246          | -1.148         | G ●                    |           |                |   |                   |  |
|                 | <i>histone-like DNA-binding protein [Methylobacillus flagellatus KT]637936898 YP_544128</i>                 |                      |                   |                 |                |            |                                               |                      |                   |                 |                |                        |           |                |   |                   |  |
| <b>MFLA0017</b> |                                                                                                             | 0.000                | 0.000             |                 |                | ●●         |                                               | 0.000                | 0.000             |                 |                | ●                      |           |                |   |                   |  |
|                 | <i>hypothetical protein [Methylobacillus flagellatus KT]637936899 YP_544129</i>                             |                      |                   |                 |                |            |                                               |                      |                   |                 |                |                        |           |                |   |                   |  |
| <b>MFLA0018</b> | 6.97 E-3                                                                                                    | 5.899                | 5.249             | 6.610           | 0.660          | R ●● Y     | 2.58 E-1                                      | 24.343               | 24.418            | 25.381          | -0.278         | Y ●                    |           |                |   |                   |  |
|                 | <i>MscS Mechanosensitive ion channel [Methylobacillus flagellatus KT]637936900 YP_544130</i>                |                      |                   |                 |                |            |                                               |                      |                   |                 |                |                        |           |                |   |                   |  |
| <b>MFLA0019</b> |                                                                                                             | 0.000                | 0.000             |                 |                | ●●         |                                               | 0.000                | 0.000             |                 |                | ●                      |           |                |   |                   |  |
|                 | <i>CBS domain containing membrane protein [Methylobacillus flagellatus KT]637936901 YP_544131</i>           |                      |                   |                 |                |            |                                               |                      |                   |                 |                |                        |           |                |   |                   |  |
| <b>MFLA0020</b> |                                                                                                             | 4.235                | 3.991             | 5.118           | 0.251          | Y ●● Y     | 7.11 E-2                                      | 22.548               | 22.765            | 23.661          | -0.227         | Y ●                    |           |                |   |                   |  |
|                 | <i>" transcriptional regulator, LysR family [Methylobacillus flagellatus KT]637936902 YP_544132 ""</i>      |                      |                   |                 |                |            |                                               |                      |                   |                 |                |                        |           |                |   |                   |  |
| <b>MFLA0021</b> |                                                                                                             | 0.000                | 0.000             |                 |                | ●●         |                                               | 0.000                | 0.000             |                 |                | ●                      |           |                |   |                   |  |
|                 | <i>coenzyme PQQ biosynthesis protein A [Methylobacillus flagellatus KT]637936903 YP_544133</i>              |                      |                   |                 |                |            |                                               |                      |                   |                 |                |                        |           |                |   |                   |  |
| <b>MFLA0022</b> |                                                                                                             | 3.571                | 3.945             | 4.770           | -0.356         | Y ●● Y     | 2.27 E-1                                      | 21.826               | 21.690            | 22.759          | -0.011         | Y ●                    |           |                |   |                   |  |
|                 | <i>Zinc finger/thioredoxin putative [Methylobacillus flagellatus KT]637936904 YP_544134</i>                 |                      |                   |                 |                |            |                                               |                      |                   |                 |                |                        |           |                |   |                   |  |

| ORF             | AM/OH <i>M. Flagellatus</i> Spectral Count                                                                                         |                              |                           |                         |                        | AM/OH <i>M. Flagellatus</i> Protein Intensity |          |                              |                           |                         | Spectral Count         |           | Protein Intensity      |  |
|-----------------|------------------------------------------------------------------------------------------------------------------------------------|------------------------------|---------------------------|-------------------------|------------------------|-----------------------------------------------|----------|------------------------------|---------------------------|-------------------------|------------------------|-----------|------------------------|--|
|                 | q-value                                                                                                                            | log <sub>2</sub> Methylamine | log <sub>2</sub> Methanol | log <sub>2</sub> Sc Sum | log <sub>2</sub> Ratio | Regulation                                    | q-value  | log <sub>2</sub> Methylamine | log <sub>2</sub> Methanol | log <sub>2</sub> PI Sum | log <sub>2</sub> Ratio | Consensus | Log <sub>2</sub> Ratio |  |
| <b>MFLA0023</b> |                                                                                                                                    | 1.843                        |                           | 1.843                   |                        | Y ●●● Y                                       | 21.732   |                              | 21.732                    |                         | Y ●●                   |           |                        |  |
|                 | <i>ribosomal protein L11 methyltransferase [Methylobacillus flagellatus KT]637936905 YP_544135</i>                                 |                              |                           |                         |                        |                                               |          |                              |                           |                         |                        |           |                        |  |
| <b>MFLA0024</b> | 3.4 E-2                                                                                                                            | 6.416                        | 6.251                     | 7.336                   | 0.212                  | Y ●●● Y                                       | 9.6 E-2  | 27.079                       | 26.853                    | 27.971                  | 0.247                  | Y ●●      |                        |  |
|                 | <i>" acetyl-CoA carboxylase, biotin carboxylase [Methylobacillus flagellatus KT]637936906 YP_544136 ""</i>                         |                              |                           |                         |                        |                                               |          |                              |                           |                         |                        |           |                        |  |
| <b>MFLA0025</b> |                                                                                                                                    | 6.510                        | 6.986                     | 7.768                   | -0.516                 | Y ●●● Y                                       | 2.8 E-1  | 25.386                       | 25.387                    | 26.386                  | -0.074                 | Y ●●      |                        |  |
|                 | <i>" acetyl-CoA carboxylase, biotin carboxyl carrier protein [Methylobacillus flagellatus KT]637936907 YP_544137 ""</i>            |                              |                           |                         |                        |                                               |          |                              |                           |                         |                        |           |                        |  |
| <b>MFLA0026</b> |                                                                                                                                    | 4.691                        | 1.346                     | 4.826                   | 3.344                  | Y ●●● Y                                       |          | 22.036                       | 19.956                    | 22.343                  | 2.080                  | Y ●●      |                        |  |
|                 | <i>" 3-dehydroquininate dehydratase, type II [Methylobacillus flagellatus KT]637936908 YP_544138 ""</i>                            |                              |                           |                         |                        |                                               |          |                              |                           |                         |                        |           |                        |  |
| <b>MFLA0027</b> |                                                                                                                                    | 0.000                        | 0.000                     |                         |                        | ■●■                                           |          | 0.000                        | 0.000                     |                         |                        | ■         |                        |  |
|                 | <i>alkyl hydroperoxide reductase/ Thiol specific antioxidant/ Mal allergen [Methylobacillus flagellatus KT]637936909 YP_544139</i> |                              |                           |                         |                        |                                               |          |                              |                           |                         |                        |           |                        |  |
| <b>MFLA0028</b> |                                                                                                                                    | 2.328                        | 2.739                     | 3.548                   | 0.590                  | Y ●●● Y                                       | 1.17 E-1 | 20.379                       | 22.087                    | 22.472                  | -0.657                 | Y ●●      |                        |  |
|                 | <i>Protein-disulfide reductase [Methylobacillus flagellatus KT]637936910 YP_544140</i>                                             |                              |                           |                         |                        |                                               |          |                              |                           |                         |                        |           |                        |  |
| <b>MFLA0029</b> |                                                                                                                                    | 0.000                        | 0.000                     |                         |                        | ■●■                                           |          | 0.000                        | 0.000                     |                         |                        | ■         |                        |  |
|                 | <i>CutA1 divalent ion tolerance protein [Methylobacillus flagellatus KT]637936911 YP_544141</i>                                    |                              |                           |                         |                        |                                               |          |                              |                           |                         |                        |           |                        |  |
| <b>MFLA0030</b> |                                                                                                                                    | 0.000                        | 0.000                     |                         |                        | ■●■                                           |          | 0.000                        | 0.000                     |                         |                        | ■         |                        |  |
|                 | <i>FxsA cytoplasmic membrane protein [Methylobacillus flagellatus KT]637936912 YP_544142</i>                                       |                              |                           |                         |                        |                                               |          |                              |                           |                         |                        |           |                        |  |
| <b>MFLA0031</b> |                                                                                                                                    | 4.522                        | 3.117                     | 4.984                   | 1.384                  | Y ●●● Y                                       | 9.8 E-2  | 23.540                       | 22.235                    | 24.030                  | 1.007                  | Y ●●      |                        |  |
|                 | <i>oxidoreductase FAD/NAD(P)-binding [Methylobacillus flagellatus KT]637936913 YP_544143</i>                                       |                              |                           |                         |                        |                                               |          |                              |                           |                         |                        |           |                        |  |
| <b>MFLA0032</b> | 1.24 E-3                                                                                                                           | 5.285                        | 4.568                     | 5.971                   | 0.642                  | R ●●● Y                                       | 1.89 E-1 | 24.045                       | 23.686                    | 24.876                  | 0.076                  | Y ●●      |                        |  |
|                 | <i>HemY-like protein [Methylobacillus flagellatus KT]637936914 YP_544144</i>                                                       |                              |                           |                         |                        |                                               |          |                              |                           |                         |                        |           |                        |  |
| <b>MFLA0033</b> | 9.34 E-2                                                                                                                           | 4.933                        | 4.951                     | 5.942                   | 0.028                  | Y ●●● Y                                       | 4.21 E-2 | 23.498                       | 24.396                    | 25.016                  | -1.024                 | Y ●●      |                        |  |
|                 | <i>" protein of unknown function DUF513, hemX [Methylobacillus flagellatus KT]637936915 YP_544145 ""</i>                           |                              |                           |                         |                        |                                               |          |                              |                           |                         |                        |           |                        |  |
| <b>MFLA0034</b> |                                                                                                                                    | 1.398                        | 3.056                     | 3.453                   | -0.652                 | Y ●●● Y                                       | 2.77 E-1 | 21.813                       | 22.822                    | 23.404                  | 0.073                  | Y ●●      |                        |  |
|                 | <i>Uroporphyrinogen-III synthase [Methylobacillus flagellatus KT]637936916 YP_544146</i>                                           |                              |                           |                         |                        |                                               |          |                              |                           |                         |                        |           |                        |  |
| <b>MFLA0035</b> | 2.85 E-2                                                                                                                           | 5.429                        | 5.475                     | 6.452                   | 0.054                  | Y ●●● G                                       | 5.06 E-3 | 23.649                       | 24.869                    | 25.385                  | -1.222                 | Y ●●      |                        |  |
|                 | <i>porphobilinogen deaminase [Methylobacillus flagellatus KT]637936917 YP_544147</i>                                               |                              |                           |                         |                        |                                               |          |                              |                           |                         |                        |           |                        |  |
| <b>MFLA0036</b> |                                                                                                                                    | 1.106                        | 1.807                     | 2.499                   | -0.702                 | Y ●●● Y                                       |          | 19.207                       | 19.106                    | 20.157                  | 0.100                  | Y ●●      |                        |  |
|                 | <i>" transcriptional regulator, LytR/AlgR family [Methylobacillus flagellatus KT]637936918 YP_544148 ""</i>                        |                              |                           |                         |                        |                                               |          |                              |                           |                         |                        |           |                        |  |
| <b>MFLA0037</b> |                                                                                                                                    | 0.521                        |                           | 0.521                   |                        | Y ●●● Y                                       |          | 17.917                       |                           | 17.917                  |                        | Y ●●      |                        |  |
|                 | <i>histidine kinase internal region [Methylobacillus flagellatus KT]637936919 YP_544149</i>                                        |                              |                           |                         |                        |                                               |          |                              |                           |                         |                        |           |                        |  |
| <b>MFLA0038</b> | 0                                                                                                                                  | 6.082                        | 7.864                     | 8.232                   | -1.761                 | G ●●● Y                                       | 6.49 E-2 | 26.050                       | 26.872                    | 27.519                  | -1.090                 | G ●●      |                        |  |
|                 | <i>argininosuccinate lyase [Methylobacillus flagellatus KT]637936920 YP_544150</i>                                                 |                              |                           |                         |                        |                                               |          |                              |                           |                         |                        |           |                        |  |
| <b>MFLA0039</b> |                                                                                                                                    | 4.851                        | 4.707                     | 5.781                   | 0.035                  | Y ●●● Y                                       | 5.47 E-2 | 22.531                       | 23.582                    | 24.151                  | -1.488                 | Y ●●      |                        |  |
|                 | <i>diguanylate cyclase (GGDEF domain) [Methylobacillus flagellatus KT]637936921 YP_544151</i>                                      |                              |                           |                         |                        |                                               |          |                              |                           |                         |                        |           |                        |  |
| <b>MFLA0040</b> |                                                                                                                                    | 2.106                        | 3.435                     | 3.918                   | -0.264                 | Y ●●● Y                                       | 1.42 E-1 | 20.271                       | 20.707                    | 21.506                  | 0.730                  | Y ●●      |                        |  |
|                 | <i>Putative oxygen-independent coproporphyrinogen III oxidase [Methylobacillus flagellatus KT]637936922 YP_544152</i>              |                              |                           |                         |                        |                                               |          |                              |                           |                         |                        |           |                        |  |
| <b>MFLA0041</b> |                                                                                                                                    | 1.106                        | 2.700                     | 3.113                   | -1.595                 | Y ●●● Y                                       |          | 21.303                       | 21.897                    | 22.630                  | -0.594                 | Y ●●      |                        |  |
|                 | <i>hypothetical protein [Methylobacillus flagellatus KT]637936923 YP_544153</i>                                                    |                              |                           |                         |                        |                                               |          |                              |                           |                         |                        |           |                        |  |
| <b>MFLA0042</b> |                                                                                                                                    | 4.160                        | 4.350                     | 5.258                   | -0.237                 | Y ●●● Y                                       | 1.03 E-1 | 24.044                       | 24.489                    | 25.284                  | -0.527                 | Y ●●      |                        |  |
|                 | <i>Ham1-like protein [Methylobacillus flagellatus KT]637936924 YP_544154</i>                                                       |                              |                           |                         |                        |                                               |          |                              |                           |                         |                        |           |                        |  |
| <b>MFLA0043</b> |                                                                                                                                    | 4.637                        | 3.979                     | 5.345                   | 0.644                  | Y ●●● Y                                       | 3.09 E-2 | 23.926                       | 24.863                    | 25.469                  | -1.040                 | Y ●●      |                        |  |
|                 | <i>ribonuclease PH [Methylobacillus flagellatus KT]637936925 YP_544155</i>                                                         |                              |                           |                         |                        |                                               |          |                              |                           |                         |                        |           |                        |  |
| <b>MFLA0044</b> |                                                                                                                                    | 3.210                        | 3.334                     | 4.273                   | -0.167                 | Y ●●● Y                                       | 1.33 E-1 | 21.611                       | 22.003                    | 22.820                  | -0.575                 | Y ●●      |                        |  |
|                 | <i>protein serine/threonine phosphatases [Methylobacillus flagellatus KT]637936926 YP_544156</i>                                   |                              |                           |                         |                        |                                               |          |                              |                           |                         |                        |           |                        |  |

| ORF             | AM/OH <i>M. Flagellatus</i> Spectral Count                                                                               |                             |                           |                         |                        |            | AM/OH <i>M. Flagellatus</i> Protein Intensity |                             |                           |                         |                        |           | Spectral Count         |  | Protein Intensity |  |
|-----------------|--------------------------------------------------------------------------------------------------------------------------|-----------------------------|---------------------------|-------------------------|------------------------|------------|-----------------------------------------------|-----------------------------|---------------------------|-------------------------|------------------------|-----------|------------------------|--|-------------------|--|
|                 | $q$ -value                                                                                                               | log <sub>2</sub> Methyamine | log <sub>2</sub> Methanol | log <sub>2</sub> Sc Sum | log <sub>2</sub> Ratio | Regulation | $q$ -value                                    | log <sub>2</sub> Methyamine | log <sub>2</sub> Methanol | log <sub>2</sub> PI Sum | log <sub>2</sub> Ratio | Consensus | Log <sub>2</sub> Ratio |  |                   |  |
| <b>MFLA0045</b> |                                                                                                                          |                             | 1.184                     | 1.184                   |                        | Y ●● Y     |                                               |                             | 20.903                    | 20.903                  |                        | Y ●●      |                        |  |                   |  |
|                 | <i>serine/threonine protein kinase [Methylobacillus flagellatus KT]637936927 YP_544157</i>                               |                             |                           |                         |                        |            |                                               |                             |                           |                         |                        |           |                        |  |                   |  |
| <b>MFLA0046</b> | 6.096                                                                                                                    | 5.435                       | 6.803                     | 0.384                   | Y ●● Y                 | 1.23 E-1   | 24.205                                        | 24.662                      | 25.451                    | -0.498                  | Y ●●                   |           |                        |  |                   |  |
|                 | <i>conserved hypothetical protein 255 [Methylobacillus flagellatus KT]637936928 YP_544158</i>                            |                             |                           |                         |                        |            |                                               |                             |                           |                         |                        |           |                        |  |                   |  |
| <b>MFLA0047</b> | 0.000                                                                                                                    | 0.000                       |                           |                         |                        |            | 0.000                                         | 0.000                       |                           |                         |                        |           |                        |  |                   |  |
|                 | <i>protein of unknown function DUF475 [Methylobacillus flagellatus KT]637936929 YP_544159</i>                            |                             |                           |                         |                        |            |                                               |                             |                           |                         |                        |           |                        |  |                   |  |
| <b>MFLA0048</b> | 3.418                                                                                                                    | 2.573                       | 4.056                     | 0.959                   | Y ●● Y                 | 1.33 E-1   | 22.671                                        | 22.254                      | 23.477                    | 0.427                   | Y ●●                   |           |                        |  |                   |  |
|                 | <i>Guanylate kinase [Methylobacillus flagellatus KT]637936930 YP_544160</i>                                              |                             |                           |                         |                        |            |                                               |                             |                           |                         |                        |           |                        |  |                   |  |
| <b>MFLA0049</b> | 4.989                                                                                                                    | 4.090                       | 5.609                     | 0.907                   | Y ●● Y                 | 1.08 E-2   | 25.443                                        | 26.335                      | 26.957                    | -0.915                  | Y ●●                   |           |                        |  |                   |  |
|                 | <i>" DNA-directed RNA polymerase, omega subunit [Methylobacillus flagellatus KT]637936931 YP_544161 ""</i>               |                             |                           |                         |                        |            |                                               |                             |                           |                         |                        |           |                        |  |                   |  |
| <b>MFLA0050</b> | 2.32 E-4                                                                                                                 | 5.179                       | 6.055                     | 6.683                   | G ●● Y                 | 8.32 E-2   | 24.554                                        | 25.123                      | 25.866                    | -0.500                  | G ●●                   |           |                        |  |                   |  |
|                 | <i>" (p)ppGpp synthetase I (GTP pyrophosphokinase), SpoT/RelA [Methylobacillus flagellatus KT]637936932 YP_544162 ""</i> |                             |                           |                         |                        |            |                                               |                             |                           |                         |                        |           |                        |  |                   |  |
| <b>MFLA0051</b> | 5.699                                                                                                                    | 1.807                       | 5.794                     | 1.424                   | Y ●● Y                 | 1.45 E-1   | 24.332                                        | 21.910                      | 24.579                    | 1.073                   | Y ●●                   |           |                        |  |                   |  |
|                 | <i>YjgF-like protein [Methylobacillus flagellatus KT]637936933 YP_544163</i>                                             |                             |                           |                         |                        |            |                                               |                             |                           |                         |                        |           |                        |  |                   |  |
| <b>MFLA0052</b> | 0.000                                                                                                                    | 0.000                       |                           |                         |                        |            | 0.000                                         | 0.000                       |                           |                         |                        |           |                        |  |                   |  |
|                 | <i>ATP-dependent DNA helicase RecG [Methylobacillus flagellatus KT]637936934 YP_544164</i>                               |                             |                           |                         |                        |            |                                               |                             |                           |                         |                        |           |                        |  |                   |  |
| <b>MFLA0053</b> | 1.106                                                                                                                    | 0.346                       | 1.775                     | 0.759                   | Y ●● Y                 |            | 17.193                                        | 20.505                      | 20.643                    | -3.311                  | Y ●●                   |           |                        |  |                   |  |
|                 | <i>Chorismate lyase [Methylobacillus flagellatus KT]637936935 YP_544165</i>                                              |                             |                           |                         |                        |            |                                               |                             |                           |                         |                        |           |                        |  |                   |  |
| <b>MFLA0054</b> | 0.000                                                                                                                    | 0.000                       |                           |                         |                        |            | 0.000                                         | 0.000                       |                           |                         |                        |           |                        |  |                   |  |
|                 | <i>4-hydroxybenzoate polyprenyl transferase [Methylobacillus flagellatus KT]637936936 YP_544166</i>                      |                             |                           |                         |                        |            |                                               |                             |                           |                         |                        |           |                        |  |                   |  |
| <b>MFLA0055</b> | 8.187                                                                                                                    | 7.580                       | 8.915                     | 0.448                   | Y ●● Y                 | 6.47 E-2   | 27.973                                        | 27.572                      | 28.787                    | 0.425                   | Y ●●                   |           |                        |  |                   |  |
|                 | <i>ribosomal protein L13 [Methylobacillus flagellatus KT]637936937 YP_544167</i>                                         |                             |                           |                         |                        |            |                                               |                             |                           |                         |                        |           |                        |  |                   |  |
| <b>MFLA0056</b> | 8.573                                                                                                                    | 8.203                       | 9.400                     | 0.331                   | Y ●● Y                 | 8.39 E-2   | 26.958                                        | 27.393                      | 28.192                    | -0.497                  | Y ●●                   |           |                        |  |                   |  |
|                 | <i>ribosomal protein S9 [Methylobacillus flagellatus KT]637936938 YP_544168</i>                                          |                             |                           |                         |                        |            |                                               |                             |                           |                         |                        |           |                        |  |                   |  |
| <b>MFLA0057</b> | 5.13 E-3                                                                                                                 | 5.163                       | 5.873                     | 6.561                   | G ●● G                 | 8.91 E-3   | 24.755                                        | 25.661                      | 26.278                    | -0.917                  | G ●●                   |           |                        |  |                   |  |
|                 | <i>N-acetyl-gamma-glutamyl-phosphate reductase [Methylobacillus flagellatus KT]637936939 YP_544169</i>                   |                             |                           |                         |                        |            |                                               |                             |                           |                         |                        |           |                        |  |                   |  |
| <b>MFLA0058</b> | 0.000                                                                                                                    | 0.000                       |                           |                         |                        |            | 0.000                                         | 0.000                       |                           |                         |                        |           |                        |  |                   |  |
|                 | <i>hypothetical protein [Methylobacillus flagellatus KT]637936940 YP_544170</i>                                          |                             |                           |                         |                        |            |                                               |                             |                           |                         |                        |           |                        |  |                   |  |
| <b>MFLA0059</b> | 0.000                                                                                                                    | 0.000                       |                           |                         |                        |            | 0.000                                         | 0.000                       |                           |                         |                        |           |                        |  |                   |  |
|                 | <i>protein of unknown function DUF583 [Methylobacillus flagellatus KT]637936941 YP_544171</i>                            |                             |                           |                         |                        |            |                                               |                             |                           |                         |                        |           |                        |  |                   |  |
| <b>MFLA0060</b> | 3.899                                                                                                                    | 4.032                       | 4.967                     | -0.098                  | Y ●● Y                 | 7.44 E-2   | 24.768                                        | 25.223                      | 26.014                    | -0.427                  | Y ●●                   |           |                        |  |                   |  |
|                 | <i>HesB/YadR/YfhF [Methylobacillus flagellatus KT]637936942 YP_544172</i>                                                |                             |                           |                         |                        |            |                                               |                             |                           |                         |                        |           |                        |  |                   |  |
| <b>MFLA0061</b> | 2.35 E-3                                                                                                                 | 7.023                       | 7.443                     | 8.248                   | Y ●● Y                 | 4.99 E-2   | 26.401                                        | 27.058                      | 27.767                    | -0.622                  | Y ●●                   |           |                        |  |                   |  |
|                 | <i>Citrate synthase I [Methylobacillus flagellatus KT]637936943 YP_544173</i>                                            |                             |                           |                         |                        |            |                                               |                             |                           |                         |                        |           |                        |  |                   |  |
| <b>MFLA0062</b> | 2.795                                                                                                                    | 2.897                       | 3.847                     | -0.117                  | Y ●● Y                 | 1.07 E-1   | 21.206                                        | 21.797                      | 22.532                    | -0.883                  | Y ●●                   |           |                        |  |                   |  |
|                 | <i>protein of unknown function UPF0075 [Methylobacillus flagellatus KT]637936944 YP_544174</i>                           |                             |                           |                         |                        |            |                                               |                             |                           |                         |                        |           |                        |  |                   |  |
| <b>MFLA0063</b> | 0.521                                                                                                                    |                             | 0.521                     |                         | Y ●● Y                 |            | 18.922                                        |                             | 18.922                    |                         | Y ●●                   |           |                        |  |                   |  |
|                 | <i>peptidase M23B [Methylobacillus flagellatus KT]637936945 YP_544175</i>                                                |                             |                           |                         |                        |            |                                               |                             |                           |                         |                        |           |                        |  |                   |  |
| <b>MFLA0064</b> | 8.159                                                                                                                    | 7.946                       | 9.056                     | 0.159                   | Y ●● Y                 | 1.24 E-1   | 26.975                                        | 27.302                      | 28.147                    | -0.412                  | Y ●●                   |           |                        |  |                   |  |
|                 | <i>tyrosyl-tRNA synthetase [Methylobacillus flagellatus KT]637936946 YP_544176</i>                                       |                             |                           |                         |                        |            |                                               |                             |                           |                         |                        |           |                        |  |                   |  |
| <b>MFLA0065</b> | 4.467                                                                                                                    | 5.352                       | 5.976                     | -0.888                  | Y ●● Y                 | 1.37 E-1   | 23.763                                        | 24.168                      | 24.980                    | -0.328                  | Y ●●                   |           |                        |  |                   |  |
|                 | <i>protein of unknown function DUF150 [Methylobacillus flagellatus KT]637936952 YP_544177</i>                            |                             |                           |                         |                        |            |                                               |                             |                           |                         |                        |           |                        |  |                   |  |
| <b>MFLA0066</b> | 8.204                                                                                                                    | 8.258                       | 9.231                     | -0.093                  | Y ●● Y                 | 1.53 E-2   | 27.646                                        | 28.027                      | 28.849                    | -0.386                  | Y ●●                   |           |                        |  |                   |  |
|                 | <i>NusA antitermination factor [Methylobacillus flagellatus KT]637936953 YP_544178</i>                                   |                             |                           |                         |                        |            |                                               |                             |                           |                         |                        |           |                        |  |                   |  |

| ORF             | AM/OH <i>M. Flagellatus</i> Spectral Count                                                                                             |                              |                           |                         |                        | AM/OH <i>M. Flagellatus</i> Protein Intensity |          |                              |                           |                         | Spectral Count         |           | Protein Intensity |  | Log <sub>2</sub> Ratio |
|-----------------|----------------------------------------------------------------------------------------------------------------------------------------|------------------------------|---------------------------|-------------------------|------------------------|-----------------------------------------------|----------|------------------------------|---------------------------|-------------------------|------------------------|-----------|-------------------|--|------------------------|
|                 | q-value                                                                                                                                | log <sub>2</sub> Methylamine | log <sub>2</sub> Methanol | log <sub>2</sub> Sc Sum | log <sub>2</sub> Ratio | Regulation                                    | q-value  | log <sub>2</sub> Methylamine | log <sub>2</sub> Methanol | log <sub>2</sub> PI Sum | log <sub>2</sub> Ratio | Consensus |                   |  |                        |
| <b>MFLA0067</b> |                                                                                                                                        | 8.477                        | 8.350                     | 9.415                   | 0.099                  | Y ●●● Y                                       | 7.77 E-2 | 27.623                       | 27.983                    | 28.814                  | -0.403                 | Y ●●      |                   |  |                        |
|                 | <i>translation initiation factor IF-2 [Methylobacillus flagellatus KT]637936954 YP_544179</i>                                          |                              |                           |                         |                        |                                               |          |                              |                           |                         |                        |           |                   |  |                        |
| <b>MFLA0068</b> |                                                                                                                                        | 1.521                        | 3.764                     | 4.040                   | -1.196                 | Y ●●● Y                                       | 1.57 E-1 | 21.070                       | 22.565                    | 23.003                  | -0.407                 | Y ●●      |                   |  |                        |
|                 | <i>ribosome-binding factor A [Methylobacillus flagellatus KT]637936955 YP_544180</i>                                                   |                              |                           |                         |                        |                                               |          |                              |                           |                         |                        |           |                   |  |                        |
| <b>MFLA0069</b> |                                                                                                                                        | 3.135                        | 2.627                     | 3.903                   | 1.509                  | Y ●●● Y                                       | 3.43 E-2 | 21.307                       | 21.930                    | 22.652                  | 0.377                  | Y ●●      |                   |  |                        |
|                 | <i>tRNA pseudouridine synthase B [Methylobacillus flagellatus KT]637936956 YP_544181</i>                                               |                              |                           |                         |                        |                                               |          |                              |                           |                         |                        |           |                   |  |                        |
| <b>MFLA0070</b> | 0                                                                                                                                      | 6.018                        | 7.260                     | 7.769                   | -1.070                 | G ●●● Y                                       | 1.99 E-2 | 26.994                       | 27.633                    | 28.349                  | -0.662                 | G ●●      |                   |  |                        |
|                 | <i>ribosomal protein S15 [Methylobacillus flagellatus KT]637936957 YP_544182</i>                                                       |                              |                           |                         |                        |                                               |          |                              |                           |                         |                        |           |                   |  |                        |
| <b>MFLA0071</b> | 0                                                                                                                                      | 9.907                        | 10.465                    | 11.213                  | -0.586                 | G ●●● Y                                       | 7.24 E-2 | 29.438                       | 29.899                    | 30.687                  | -0.503                 | G ●●      |                   |  |                        |
|                 | <i>3' exoribonuclease [Methylobacillus flagellatus KT]637936958 YP_544183</i>                                                          |                              |                           |                         |                        |                                               |          |                              |                           |                         |                        |           |                   |  |                        |
| <b>MFLA0072</b> |                                                                                                                                        | 6.635                        | 7.343                     | 8.032                   | -0.906                 | Y ●●● Y                                       | 5.55 E-2 | 26.240                       | 26.838                    | 27.570                  | -0.645                 | Y ●●      |                   |  |                        |
|                 | <i>" transcriptional regulators, TraR/DksA family [Methylobacillus flagellatus KT]637936959 YP_544184 ""</i>                           |                              |                           |                         |                        |                                               |          |                              |                           |                         |                        |           |                   |  |                        |
| <b>MFLA0073</b> | 2.36 E-14                                                                                                                              | 5.426                        | 6.845                     | 7.303                   | -1.419                 | G ●●● Y                                       | 1.1 E-2  | 24.884                       | 25.843                    | 26.442                  | -0.954                 | G ●●      |                   |  |                        |
|                 | <i>Methenyltetrahydrofolate cyclohydrolase [Methylobacillus flagellatus KT]637936960 YP_544185</i>                                     |                              |                           |                         |                        |                                               |          |                              |                           |                         |                        |           |                   |  |                        |
| <b>MFLA0074</b> |                                                                                                                                        | 5.287                        | 5.534                     | 6.416                   | -0.417                 | Y ●●● Y                                       | 4.5 E-2  | 23.592                       | 24.337                    | 25.012                  | -0.710                 | Y ●●      |                   |  |                        |
|                 | <i>" two component, sigma54 specific, transcriptional regulator, Fis family [Methylobacillus flagellatus KT]637936964 YP_544186 ""</i> |                              |                           |                         |                        |                                               |          |                              |                           |                         |                        |           |                   |  |                        |
| <b>MFLA0075</b> |                                                                                                                                        | 1.843                        | 0.585                     | 2.347                   | 1.258                  | Y ●●● Y                                       |          | 20.182                       | 20.066                    | 21.125                  | 0.116                  | Y ●●      |                   |  |                        |
|                 | <i>" general secretion pathway protein, ATPase [Methylobacillus flagellatus KT]637936965 YP_544187 ""</i>                              |                              |                           |                         |                        |                                               |          |                              |                           |                         |                        |           |                   |  |                        |
| <b>MFLA0076</b> |                                                                                                                                        | 0.000                        | 0.000                     |                         |                        | ●●●                                           |          | 0.000                        | 0.000                     |                         |                        | ●●        |                   |  |                        |
|                 | <i>type II and III secretion system protein [Methylobacillus flagellatus KT]637936966 YP_544188</i>                                    |                              |                           |                         |                        |                                               |          |                              |                           |                         |                        |           |                   |  |                        |
| <b>MFLA0077</b> |                                                                                                                                        | 0.000                        | 0.000                     |                         |                        | ●●●                                           |          | 0.000                        | 0.000                     |                         |                        | ●●        |                   |  |                        |
|                 | <i>TPR repeat [Methylobacillus flagellatus KT]637936967 YP_544189</i>                                                                  |                              |                           |                         |                        |                                               |          |                              |                           |                         |                        |           |                   |  |                        |
| <b>MFLA0078</b> |                                                                                                                                        | 0.521                        | 1.915                     | 2.380                   | -0.314                 | Y ●●● Y                                       | 9.25 E-2 | 19.596                       | 20.286                    | 20.982                  | 0.317                  | Y ●●      |                   |  |                        |
|                 | <i>type II secretion system protein E [Methylobacillus flagellatus KT]637936968 YP_544190</i>                                          |                              |                           |                         |                        |                                               |          |                              |                           |                         |                        |           |                   |  |                        |
| <b>MFLA0079</b> |                                                                                                                                        | 0.000                        | 0.000                     |                         |                        | ●●●                                           |          | 0.000                        | 0.000                     |                         |                        | ●●        |                   |  |                        |
|                 | <i>type II secretion system protein [Methylobacillus flagellatus KT]637936969 YP_544191</i>                                            |                              |                           |                         |                        |                                               |          |                              |                           |                         |                        |           |                   |  |                        |
| <b>MFLA0080</b> |                                                                                                                                        |                              | 1.000                     | 1.000                   |                        | Y ●●● Y                                       |          |                              | 19.484                    | 19.484                  |                        | Y ●●      |                   |  |                        |
|                 | <i>hypothetical protein [Methylobacillus flagellatus KT]637936970 YP_544192</i>                                                        |                              |                           |                         |                        |                                               |          |                              |                           |                         |                        |           |                   |  |                        |
| <b>MFLA0081</b> |                                                                                                                                        | 0.000                        | 0.000                     |                         |                        | ●●●                                           |          | 0.000                        | 0.000                     |                         |                        | ●●        |                   |  |                        |
|                 | <i>hypothetical protein [Methylobacillus flagellatus KT]637936971 YP_544193</i>                                                        |                              |                           |                         |                        |                                               |          |                              |                           |                         |                        |           |                   |  |                        |
| <b>MFLA0082</b> |                                                                                                                                        | 0.000                        | 0.000                     |                         |                        | ●●●                                           |          | 0.000                        | 0.000                     |                         |                        | ●●        |                   |  |                        |
|                 | <i>hypothetical protein [Methylobacillus flagellatus KT]637936972 YP_544194</i>                                                        |                              |                           |                         |                        |                                               |          |                              |                           |                         |                        |           |                   |  |                        |
| <b>MFLA0083</b> |                                                                                                                                        | 0.000                        | 0.000                     |                         |                        | ●●●                                           |          | 0.000                        | 0.000                     |                         |                        | ●●        |                   |  |                        |
|                 | <i>hypothetical protein [Methylobacillus flagellatus KT]637936973 YP_544195</i>                                                        |                              |                           |                         |                        |                                               |          |                              |                           |                         |                        |           |                   |  |                        |
| <b>MFLA0084</b> |                                                                                                                                        | 0.000                        | 0.000                     |                         |                        | ●●●                                           |          | 0.000                        | 0.000                     |                         |                        | ●●        |                   |  |                        |
|                 | <i>methylation [Methylobacillus flagellatus KT]637936974 YP_544196</i>                                                                 |                              |                           |                         |                        |                                               |          |                              |                           |                         |                        |           |                   |  |                        |
| <b>MFLA0085</b> |                                                                                                                                        |                              | 2.991                     | 2.991                   |                        | Y ●●● Y                                       |          |                              | 21.534                    | 21.534                  |                        | Y ●●      |                   |  |                        |
|                 | <i>UBA/THIF-type NAD/FAD binding fold [Methylobacillus flagellatus KT]637936975 YP_544197</i>                                          |                              |                           |                         |                        |                                               |          |                              |                           |                         |                        |           |                   |  |                        |
| <b>MFLA0086</b> | 1.71 E-3                                                                                                                               | 6.309                        | 5.707                     | 7.039                   | 0.600                  | R ●●● R                                       | 8.64 E-3 | 26.425                       | 25.595                    | 27.069                  | 0.842                  | R ●●      |                   |  |                        |
|                 | <i>band 7 protein [Methylobacillus flagellatus KT]637936976 YP_544198</i>                                                              |                              |                           |                         |                        |                                               |          |                              |                           |                         |                        |           |                   |  |                        |
| <b>MFLA0087</b> |                                                                                                                                        | 3.093                        | 3.848                     | 4.519                   | -0.736                 | Y ●●● Y                                       | 4.93 E-2 | 20.498                       | 22.013                    | 22.446                  | -1.402                 | Y ●●      |                   |  |                        |
|                 | <i>protein of unknown function DUF107 [Methylobacillus flagellatus KT]637936977 YP_544199</i>                                          |                              |                           |                         |                        |                                               |          |                              |                           |                         |                        |           |                   |  |                        |
| <b>MFLA0088</b> |                                                                                                                                        | 0.000                        | 0.000                     |                         |                        | ●●●                                           |          | 0.000                        | 0.000                     |                         |                        | ●●        |                   |  |                        |
|                 | <i>hypothetical protein [Methylobacillus flagellatus KT]637936978 YP_544200</i>                                                        |                              |                           |                         |                        |                                               |          |                              |                           |                         |                        |           |                   |  |                        |

| ORF             | AM/OH <i>M. Flagellatus</i> Spectral Count                                                                                       |                              |                           |                         |                        |            | AM/OH <i>M. Flagellatus</i> Protein Intensity |                              |                           |                         |                        |                        | Consensus | Spectral Count |   | Protein Intensity |  |
|-----------------|----------------------------------------------------------------------------------------------------------------------------------|------------------------------|---------------------------|-------------------------|------------------------|------------|-----------------------------------------------|------------------------------|---------------------------|-------------------------|------------------------|------------------------|-----------|----------------|---|-------------------|--|
|                 | q-value                                                                                                                          | log <sub>2</sub> Methylamine | log <sub>2</sub> Methanol | log <sub>2</sub> Sc Sum | log <sub>2</sub> Ratio | Regulation | q-value                                       | log <sub>2</sub> Methylamine | log <sub>2</sub> Methanol | log <sub>2</sub> PI Sum | log <sub>2</sub> Ratio | Log <sub>2</sub> Ratio |           | -7             | 0 | 7                 |  |
| <b>MFLA0089</b> |                                                                                                                                  | 3.656                        | 2.871                     | 4.316                   | 0.786                  | Y ●●● Y    | 5.54 E-2                                      | 22.448                       | 21.592                    | 23.083                  | 0.794                  | Y ●●                   |           |                |   |                   |  |
|                 | <i>LemA [Methylobacillus flagellatus KT]637936979 YP_544201</i>                                                                  |                              |                           |                         |                        |            |                                               |                              |                           |                         |                        |                        |           |                |   |                   |  |
| <b>MFLA0090</b> |                                                                                                                                  | 0.000                        | 0.000                     |                         |                        | ●●         |                                               | 0.000                        | 0.000                     |                         |                        | ●                      |           |                |   |                   |  |
|                 | <i>hypothetical protein [Methylobacillus flagellatus KT]637936980 YP_544202</i>                                                  |                              |                           |                         |                        |            |                                               |                              |                           |                         |                        |                        |           |                |   |                   |  |
| <b>MFLA0091</b> | 1.82 E-4                                                                                                                         | 7.628                        | 8.044                     | 8.851                   | -0.414                 | Y ●●● Y    | 3.33 E-2                                      | 26.128                       | 27.020                    | 27.642                  | -0.922                 | Y ●●                   |           |                |   |                   |  |
|                 | <i>valyl-tRNA synthetase [Methylobacillus flagellatus KT]637936981 YP_544203</i>                                                 |                              |                           |                         |                        |            |                                               |                              |                           |                         |                        |                        |           |                |   |                   |  |
| <b>MFLA0092</b> |                                                                                                                                  | 2.410                        | 2.410                     |                         |                        | Y ●●● Y    |                                               |                              | 20.836                    | 20.836                  |                        | Y ●●                   |           |                |   |                   |  |
|                 | <i>protein of unknown function UPF0187 [Methylobacillus flagellatus KT]637936982 YP_544204</i>                                   |                              |                           |                         |                        |            |                                               |                              |                           |                         |                        |                        |           |                |   |                   |  |
| <b>MFLA0093</b> |                                                                                                                                  | 2.106                        | 3.705                     | 4.117                   | -0.264                 | Y ●●● Y    | 1.15 E-1                                      | 22.145                       | 25.048                    | 25.229                  | -1.721                 | Y ●●                   |           |                |   |                   |  |
|                 | <i>SirA-like protein [Methylobacillus flagellatus KT]637936983 YP_544205</i>                                                     |                              |                           |                         |                        |            |                                               |                              |                           |                         |                        |                        |           |                |   |                   |  |
| <b>MFLA0094</b> |                                                                                                                                  | 0.000                        | 0.000                     |                         |                        | ●●         |                                               | 0.000                        | 0.000                     |                         |                        | ●                      |           |                |   |                   |  |
|                 | <i>Rhodanese-like protein [Methylobacillus flagellatus KT]637936984 YP_544206</i>                                                |                              |                           |                         |                        |            |                                               |                              |                           |                         |                        |                        |           |                |   |                   |  |
| <b>MFLA0095</b> |                                                                                                                                  | 0.000                        | 0.000                     |                         |                        | ●●         |                                               | 0.000                        | 0.000                     |                         |                        | ●                      |           |                |   |                   |  |
|                 | <i>TonB-dependent siderophore receptor [Methylobacillus flagellatus KT]637936985 YP_544207</i>                                   |                              |                           |                         |                        |            |                                               |                              |                           |                         |                        |                        |           |                |   |                   |  |
| <b>MFLA0096</b> |                                                                                                                                  | 0.000                        | 0.000                     |                         |                        | ●●         |                                               | 0.000                        | 0.000                     |                         |                        | ●                      |           |                |   |                   |  |
|                 | <i>" Prolyl 4-hydroxylase, alpha subunit [Methylobacillus flagellatus KT]637936986 YP_544208 ""</i>                              |                              |                           |                         |                        |            |                                               |                              |                           |                         |                        |                        |           |                |   |                   |  |
| <b>MFLA0097</b> |                                                                                                                                  | 0.000                        | 0.000                     |                         |                        | ●●         |                                               | 0.000                        | 0.000                     |                         |                        | ●                      |           |                |   |                   |  |
|                 | <i>Sel1 [Methylobacillus flagellatus KT]637936987 YP_544209</i>                                                                  |                              |                           |                         |                        |            |                                               |                              |                           |                         |                        |                        |           |                |   |                   |  |
| <b>MFLA0098</b> |                                                                                                                                  |                              | 0.585                     | 0.585                   |                        | Y ●●● Y    |                                               |                              | 21.187                    | 21.187                  |                        | Y ●●                   |           |                |   |                   |  |
|                 | <i>Nicotinate-nucleotide-dimethylbenzimidazole phosphoribosyltransferase [Methylobacillus flagellatus KT]637936989 YP_544210</i> |                              |                           |                         |                        |            |                                               |                              |                           |                         |                        |                        |           |                |   |                   |  |
| <b>MFLA0099</b> |                                                                                                                                  | 0.000                        | 0.000                     |                         |                        | ●●         |                                               | 0.000                        | 0.000                     |                         |                        | ●                      |           |                |   |                   |  |
|                 | <i>cobalamin 5'-phosphate synthase [Methylobacillus flagellatus KT]637936990 YP_544211</i>                                       |                              |                           |                         |                        |            |                                               |                              |                           |                         |                        |                        |           |                |   |                   |  |
| <b>MFLA0100</b> |                                                                                                                                  | 2.210                        | 2.210                     |                         |                        | Y ●●● Y    |                                               | 20.973                       |                           | 20.973                  |                        | Y ●●                   |           |                |   |                   |  |
|                 | <i>Phosphoglycerate mutase [Methylobacillus flagellatus KT]637936991 YP_544212</i>                                               |                              |                           |                         |                        |            |                                               |                              |                           |                         |                        |                        |           |                |   |                   |  |
| <b>MFLA0101</b> |                                                                                                                                  | 0.000                        | 0.000                     |                         |                        | ●●         |                                               | 0.000                        | 0.000                     |                         |                        | ●                      |           |                |   |                   |  |
|                 | <i>" aminotransferase, class I and II [Methylobacillus flagellatus KT]637936992 YP_544213 ""</i>                                 |                              |                           |                         |                        |            |                                               |                              |                           |                         |                        |                        |           |                |   |                   |  |
| <b>MFLA0102</b> |                                                                                                                                  | 0.000                        | 0.000                     |                         |                        | ●●         |                                               | 0.000                        | 0.000                     |                         |                        | ●                      |           |                |   |                   |  |
|                 | <i>cobalamin biosynthesis protein CobD [Methylobacillus flagellatus KT]637936993 YP_544214</i>                                   |                              |                           |                         |                        |            |                                               |                              |                           |                         |                        |                        |           |                |   |                   |  |
| <b>MFLA0103</b> |                                                                                                                                  | 0.000                        | 0.000                     |                         |                        | ●●         |                                               | 0.000                        | 0.000                     |                         |                        | ●                      |           |                |   |                   |  |
|                 | <i>cobyric acid synthase CobQ [Methylobacillus flagellatus KT]637936994 YP_544215</i>                                            |                              |                           |                         |                        |            |                                               |                              |                           |                         |                        |                        |           |                |   |                   |  |
| <b>MFLA0104</b> |                                                                                                                                  | 0.000                        | 0.000                     |                         |                        | ●●         |                                               | 0.000                        | 0.000                     |                         |                        | ●                      |           |                |   |                   |  |
|                 | <i>hypothetical protein [Methylobacillus flagellatus KT]637936995 YP_544216</i>                                                  |                              |                           |                         |                        |            |                                               |                              |                           |                         |                        |                        |           |                |   |                   |  |
| <b>MFLA0105</b> |                                                                                                                                  | 0.000                        | 0.000                     |                         |                        | ●●         |                                               | 0.000                        | 0.000                     |                         |                        | ●                      |           |                |   |                   |  |
|                 | <i>hypothetical protein [Methylobacillus flagellatus KT]637936996 YP_544217</i>                                                  |                              |                           |                         |                        |            |                                               |                              |                           |                         |                        |                        |           |                |   |                   |  |
| <b>MFLA0106</b> |                                                                                                                                  | 3.674                        | 4.814                     | 5.354                   | -1.145                 | Y ●●● Y    | 6.56 E-2                                      | 23.538                       | 24.595                    | 25.161                  | -1.548                 | Y ●●                   |           |                |   |                   |  |
|                 | <i>" methionine aminopeptidase, type I [Methylobacillus flagellatus KT]637936997 YP_544218 ""</i>                                |                              |                           |                         |                        |            |                                               |                              |                           |                         |                        |                        |           |                |   |                   |  |
| <b>MFLA0107</b> |                                                                                                                                  |                              | 1.585                     | 1.585                   |                        | Y ●●● Y    |                                               |                              | 18.700                    | 18.700                  |                        | Y ●●                   |           |                |   |                   |  |
|                 | <i>hypothetical protein [Methylobacillus flagellatus KT]637936998 YP_544219</i>                                                  |                              |                           |                         |                        |            |                                               |                              |                           |                         |                        |                        |           |                |   |                   |  |
| <b>MFLA0108</b> |                                                                                                                                  | 4.492                        | 4.492                     |                         |                        | Y ●●● Y    |                                               | 22.531                       |                           | 22.531                  |                        | Y ●●                   |           |                |   |                   |  |
|                 | <i>hypothetical protein [Methylobacillus flagellatus KT]637936999 YP_544220</i>                                                  |                              |                           |                         |                        |            |                                               |                              |                           |                         |                        |                        |           |                |   |                   |  |
| <b>MFLA0109</b> | 0                                                                                                                                | 7.700                        | 5.788                     | 8.040                   | 1.914                  | R ●●● Y    | 2.01 E-2                                      | 26.885                       | 25.422                    | 27.331                  | 1.443                  | R ●●                   |           |                |   |                   |  |
|                 | <i>TonB-dependent siderophore receptor [Methylobacillus flagellatus KT]637937000 YP_544221</i>                                   |                              |                           |                         |                        |            |                                               |                              |                           |                         |                        |                        |           |                |   |                   |  |
| <b>MFLA0110</b> |                                                                                                                                  | 0.000                        | 0.000                     |                         |                        | ●●         |                                               | 0.000                        | 0.000                     |                         |                        | ●                      |           |                |   |                   |  |
|                 | <i>hypothetical protein [Methylobacillus flagellatus KT]637937001 YP_544222</i>                                                  |                              |                           |                         |                        |            |                                               |                              |                           |                         |                        |                        |           |                |   |                   |  |

| ORF             | AM/OH <i>M. Flagellatus</i> Spectral Count                                                              |                              |                           |                         |                        | AM/OH <i>M. Flagellatus</i> Protein Intensity |                 |                              |                           |                         | Spectral Count         |           | Protein Intensity      |  |  |
|-----------------|---------------------------------------------------------------------------------------------------------|------------------------------|---------------------------|-------------------------|------------------------|-----------------------------------------------|-----------------|------------------------------|---------------------------|-------------------------|------------------------|-----------|------------------------|--|--|
|                 | <i>q</i> -value                                                                                         | log <sub>2</sub> Methylamine | log <sub>2</sub> Methanol | log <sub>2</sub> Sc Sum | log <sub>2</sub> Ratio | Regulation                                    | <i>q</i> -value | log <sub>2</sub> Methylamine | log <sub>2</sub> Methanol | log <sub>2</sub> PI Sum | log <sub>2</sub> Ratio | Consensus | Log <sub>2</sub> Ratio |  |  |
| <b>MFLA0111</b> |                                                                                                         | 5.060                        | 4.742                     | 5.909                   | 0.330                  | Y ●● Y                                        | 7.97 E-2        | 24.088                       | 24.360                    | 25.230                  | -0.258                 | Y ●       |                        |  |  |
|                 | <i>hypothetical protein [Methylobacillus flagellatus KT]637937002 YP_544223</i>                         |                              |                           |                         |                        |                                               |                 |                              |                           |                         |                        |           |                        |  |  |
| <b>MFLA0112</b> |                                                                                                         | 1.106                        | 1.322                     | 2.218                   | -0.216                 | Y ●● Y                                        |                 | 19.089                       | 19.410                    | 20.258                  | -0.321                 | Y ●       |                        |  |  |
|                 | <i>hypothetical protein [Methylobacillus flagellatus KT]637937003 YP_544224</i>                         |                              |                           |                         |                        |                                               |                 |                              |                           |                         |                        |           |                        |  |  |
| <b>MFLA0113</b> |                                                                                                         | 5.345                        | 6.000                     | 6.709                   | -0.814                 | Y ●● G                                        | 9.87 E-3        | 23.660                       | 24.938                    | 25.436                  | -1.270                 | G ●       |                        |  |  |
|                 | <i>cobalamin biosynthesis enzyme [Methylobacillus flagellatus KT]637937004 YP_544225</i>                |                              |                           |                         |                        |                                               |                 |                              |                           |                         |                        |           |                        |  |  |
| <b>MFLA0114</b> |                                                                                                         | 3.106                        | 2.015                     | 3.661                   | 2.140                  | Y ●● Y                                        | 1.34 E-1        | 21.398                       | 25.429                    | 25.514                  | -2.449                 | Y ●       |                        |  |  |
|                 | <i>periplasmic binding protein [Methylobacillus flagellatus KT]637937005 YP_544226</i>                  |                              |                           |                         |                        |                                               |                 |                              |                           |                         |                        |           |                        |  |  |
| <b>MFLA0115</b> |                                                                                                         | 4.017                        | 4.949                     | 5.557                   | -0.974                 | Y ●● Y                                        | 4.29 E-2        | 22.413                       | 23.789                    | 24.259                  | -1.783                 | Y ●       |                        |  |  |
|                 | <i>"Cob(II)yrinic acid a,c-diamide reductase [Methylobacillus flagellatus KT]637937006 YP_544227 ""</i> |                              |                           |                         |                        |                                               |                 |                              |                           |                         |                        |           |                        |  |  |
| <b>MFLA0116</b> |                                                                                                         | 0.000                        | 0.000                     |                         |                        | ●●                                            |                 | 0.000                        | 0.000                     |                         |                        | ●         |                        |  |  |
|                 | <i>hypothetical protein [Methylobacillus flagellatus KT]637937007 YP_544228</i>                         |                              |                           |                         |                        |                                               |                 |                              |                           |                         |                        |           |                        |  |  |
| <b>MFLA0117</b> |                                                                                                         | 0.000                        | 0.000                     |                         |                        | ●●                                            |                 | 0.000                        | 0.000                     |                         |                        | ●         |                        |  |  |
|                 | <i>MotA/ToIQ/ExxB proton channel [Methylobacillus flagellatus KT]637937008 YP_544229</i>                |                              |                           |                         |                        |                                               |                 |                              |                           |                         |                        |           |                        |  |  |
| <b>MFLA0118</b> |                                                                                                         | 3.52 E-12                    | 5.804                     | 6.989                   | -1.184                 | G ●● G                                        | 6.36 E-3        | 24.204                       | 25.679                    | 26.122                  | -1.482                 | G ●       |                        |  |  |
|                 | <i>CobN/magnesium chelatase [Methylobacillus flagellatus KT]637937009 YP_544230</i>                     |                              |                           |                         |                        |                                               |                 |                              |                           |                         |                        |           |                        |  |  |
| <b>MFLA0119</b> |                                                                                                         | 4.052                        | 4.732                     | 5.432                   | -0.854                 | Y ●● Y                                        | 1.66 E-2        | 21.737                       | 24.237                    | 24.472                  | -2.619                 | Y ●       |                        |  |  |
|                 | <i>CobB/CobQ-like glutamine amidotransferase [Methylobacillus flagellatus KT]637937010 YP_544231</i>    |                              |                           |                         |                        |                                               |                 |                              |                           |                         |                        |           |                        |  |  |
| <b>MFLA0120</b> |                                                                                                         | 3.221                        | 3.579                     | 4.411                   | 0.691                  | Y ●● Y                                        | 2.28 E-1        | 22.814                       | 23.945                    | 24.487                  | -0.065                 | Y ●       |                        |  |  |
|                 | <i>cob(I)alamin adenosyltransferase [Methylobacillus flagellatus KT]637937011 YP_544232</i>             |                              |                           |                         |                        |                                               |                 |                              |                           |                         |                        |           |                        |  |  |
| <b>MFLA0121</b> |                                                                                                         | 0.000                        | 0.000                     |                         |                        | ●●                                            |                 | 0.000                        | 0.000                     |                         |                        | ●         |                        |  |  |
|                 | <i>hypothetical protein [Methylobacillus flagellatus KT]637937012 YP_544233</i>                         |                              |                           |                         |                        |                                               |                 |                              |                           |                         |                        |           |                        |  |  |
| <b>MFLA0122</b> |                                                                                                         | 10.944                       | 11.130                    | 12.040                  | -0.251                 | Y ●● Y                                        | 6.6 E-2         | 29.387                       | 30.197                    | 30.848                  | -1.044                 | Y ●       |                        |  |  |
|                 | <i>TonB-dependent receptor [Methylobacillus flagellatus KT]637937013 YP_544234</i>                      |                              |                           |                         |                        |                                               |                 |                              |                           |                         |                        |           |                        |  |  |
| <b>MFLA0123</b> |                                                                                                         | 1.398                        | 3.754                     | 4.012                   | -1.355                 | Y ●● Y                                        | 2.48 E-1        | 22.593                       | 23.547                    | 24.148                  | 0.070                  | Y ●       |                        |  |  |
|                 | <i>hypothetical protein [Methylobacillus flagellatus KT]637937014 YP_544235</i>                         |                              |                           |                         |                        |                                               |                 |                              |                           |                         |                        |           |                        |  |  |
| <b>MFLA0124</b> |                                                                                                         | 2.025                        | 3.941                     | 4.280                   | -1.960                 | Y ●● Y                                        | 1.87 E-2        | 21.481                       | 24.189                    | 24.394                  | -2.723                 | Y ●       |                        |  |  |
|                 | <i>protein of unknown function DUF710 [Methylobacillus flagellatus KT]637937015 YP_544236</i>           |                              |                           |                         |                        |                                               |                 |                              |                           |                         |                        |           |                        |  |  |
| <b>MFLA0125</b> |                                                                                                         | 2.135                        |                           | 2.135                   |                        | Y ●● Y                                        |                 | 19.509                       |                           | 19.509                  |                        | Y ●       |                        |  |  |
|                 | <i>hypothetical protein [Methylobacillus flagellatus KT]637937016 YP_544237</i>                         |                              |                           |                         |                        |                                               |                 |                              |                           |                         |                        |           |                        |  |  |
| <b>MFLA0126</b> |                                                                                                         | 3.610                        | 4.864                     | 5.369                   | -1.320                 | Y ●● G                                        | 4.29 E-3        | 23.481                       | 24.760                    | 25.258                  | -1.282                 | G ●       |                        |  |  |
|                 | <i>protein of unknown function DUF589 [Methylobacillus flagellatus KT]637937017 YP_544238</i>           |                              |                           |                         |                        |                                               |                 |                              |                           |                         |                        |           |                        |  |  |
| <b>MFLA0127</b> |                                                                                                         | 8.653                        | 9.238                     | 9.975                   | -0.817                 | Y ●● Y                                        | 2.52 E-2        | 27.686                       | 28.352                    | 29.057                  | -0.699                 | Y ●       |                        |  |  |
|                 | <i>"ferric uptake regulator, FUR family [Methylobacillus flagellatus KT]637937018 YP_544239 ""</i>      |                              |                           |                         |                        |                                               |                 |                              |                           |                         |                        |           |                        |  |  |
| <b>MFLA0128</b> |                                                                                                         | 5.716                        | 4.830                     | 6.340                   | 0.811                  | Y ●● Y                                        | 1.23 E-1        | 24.713                       | 25.089                    | 25.913                  | -0.411                 | Y ●       |                        |  |  |
|                 | <i>"threonine dehydratase, biosynthetic [Methylobacillus flagellatus KT]637937019 YP_544240 ""</i>      |                              |                           |                         |                        |                                               |                 |                              |                           |                         |                        |           |                        |  |  |
| <b>MFLA0129</b> |                                                                                                         | 0                            | 9.681                     | 10.142                  | 10.930                 | Y ●● Y                                        | 1.13 E-2        | 28.023                       | 28.773                    | 29.447                  | -0.767                 | Y ●       |                        |  |  |
|                 | <i>ribose 5-phosphate isomerase [Methylobacillus flagellatus KT]637937020 YP_544241</i>                 |                              |                           |                         |                        |                                               |                 |                              |                           |                         |                        |           |                        |  |  |
| <b>MFLA0130</b> |                                                                                                         | 6.56 E-4                     | 5.384                     | 4.664                   | 6.068                  | 0.629                                         | R ●● Y          | 1.29 E-1                     | 24.169                    | 23.223                  | 24.772                 | 0.445     | R ●                    |  |  |
|                 | <i>"phosphate uptake regulator, PhoU [Methylobacillus flagellatus KT]637937021 YP_544242 ""</i>         |                              |                           |                         |                        |                                               |                 |                              |                           |                         |                        |           |                        |  |  |
| <b>MFLA0131</b> |                                                                                                         | 4.517                        | 4.697                     | 5.610                   | -0.170                 | Y ●● G                                        | 6.36 E-3        | 22.552                       | 23.930                    | 24.400                  | -1.401                 | G ●       |                        |  |  |
|                 | <i>Ppx/GppA phosphatase [Methylobacillus flagellatus KT]637937022 YP_544243</i>                         |                              |                           |                         |                        |                                               |                 |                              |                           |                         |                        |           |                        |  |  |
| <b>MFLA0132</b> |                                                                                                         | 4.978                        | 4.816                     | 5.899                   | 0.163                  | Y ●● G                                        | 3.73 E-3        | 22.723                       | 24.186                    | 24.633                  | -1.464                 | Y ●       |                        |  |  |
|                 | <i>Polyphosphate kinase [Methylobacillus flagellatus KT]637937023 YP_544244</i>                         |                              |                           |                         |                        |                                               |                 |                              |                           |                         |                        |           |                        |  |  |

| ORF             | AM/OH <i>M. Flagellatus</i> Spectral Count                                                                     |                              |                           |                         |                        |            | AM/OH <i>M. Flagellatus</i> Protein Intensity |                              |                           |                         |                        |        | Consensus | Log <sub>2</sub> Ratio |
|-----------------|----------------------------------------------------------------------------------------------------------------|------------------------------|---------------------------|-------------------------|------------------------|------------|-----------------------------------------------|------------------------------|---------------------------|-------------------------|------------------------|--------|-----------|------------------------|
|                 | q-value                                                                                                        | log <sub>2</sub> Methylamine | log <sub>2</sub> Methanol | log <sub>2</sub> Sc Sum | log <sub>2</sub> Ratio | Regulation | q-value                                       | log <sub>2</sub> Methylamine | log <sub>2</sub> Methanol | log <sub>2</sub> PI Sum | log <sub>2</sub> Ratio |        |           |                        |
| <b>MFLA0133</b> | 1.19 E-2                                                                                                       | 5.837                        | 5.435                     | 6.650                   | 0.324                  | Y ●● Y     | 1.43 E-1                                      | 25.488                       | 25.897                    | 26.707                  | -0.436                 | Y ●    |           |                        |
|                 | <i>Fe(II) trafficking protein YggX [Methylobacillus flagellatus KT]637937024 YP_544245</i>                     |                              |                           |                         |                        |            |                                               |                              |                           |                         |                        |        |           |                        |
| <b>MFLA0134</b> |                                                                                                                | 3.561                        |                           | 3.561                   |                        | Y ●● Y     |                                               | 22.275                       |                           | 22.275                  |                        | Y ●    |           |                        |
|                 | <i>TonB-dependent receptor [Methylobacillus flagellatus KT]637937025 YP_544246</i>                             |                              |                           |                         |                        |            |                                               |                              |                           |                         |                        |        |           |                        |
| <b>MFLA0135</b> |                                                                                                                | 0.000                        | 0.000                     |                         |                        | ■ ■        |                                               | 0.000                        | 0.000                     |                         |                        | ■      |           |                        |
|                 | <i>hypothetical protein [Methylobacillus flagellatus KT]637937026 YP_544247</i>                                |                              |                           |                         |                        |            |                                               |                              |                           |                         |                        |        |           |                        |
| <b>MFLA0136</b> | 4.628                                                                                                          | 4.669                        | 5.649                     | -0.069                  | Y ●● Y                 | Y          | 7.54 E-2                                      | 22.914                       | 23.597                    | 24.295                  | -0.786                 | Y ●    |           |                        |
|                 | <i>FAD dependent oxidoreductase [Methylobacillus flagellatus KT]637937027 YP_544248</i>                        |                              |                           |                         |                        |            |                                               |                              |                           |                         |                        |        |           |                        |
| <b>MFLA0137</b> | 2.843                                                                                                          | 3.321                        | 4.101                     | 0.647                   | Y ●● Y                 | Y          | 1.28 E-1                                      | 21.357                       | 21.477                    | 22.418                  | 1.279                  | Y ●    |           |                        |
|                 | <i>KpsF/GutQ family protein [Methylobacillus flagellatus KT]637937028 YP_544249</i>                            |                              |                           |                         |                        |            |                                               |                              |                           |                         |                        |        |           |                        |
| <b>MFLA0138</b> | 4.481                                                                                                          | 4.337                        | 5.411                     | -0.138                  | Y ●● Y                 | Y          | 9.11 E-2                                      | 22.022                       | 22.732                    | 23.421                  | -1.019                 | Y ●    |           |                        |
|                 | <i>Phosphatase kdsC [Methylobacillus flagellatus KT]637937029 YP_544250</i>                                    |                              |                           |                         |                        |            |                                               |                              |                           |                         |                        |        |           |                        |
| <b>MFLA0139</b> | 4.289                                                                                                          | 4.143                        | 5.218                     | 0.155                   | Y ●● Y                 | Y          | 2.56 E-2                                      | 23.822                       | 23.594                    | 24.712                  | 0.227                  | Y ●    |           |                        |
|                 | <i>protein of unknown function DUF1239 [Methylobacillus flagellatus KT]637937030 YP_544251</i>                 |                              |                           |                         |                        |            |                                               |                              |                           |                         |                        |        |           |                        |
| <b>MFLA0140</b> | 3.439                                                                                                          | 3.793                        | 4.627                     | -0.375                  | Y ●● Y                 | Y          | 3.77 E-2                                      | 23.056                       | 24.208                    | 24.744                  | -1.457                 | Y ●    |           |                        |
|                 | <i>OstA-like protein [Methylobacillus flagellatus KT]637937031 YP_544252</i>                                   |                              |                           |                         |                        |            |                                               |                              |                           |                         |                        |        |           |                        |
| <b>MFLA0141</b> | 3.408                                                                                                          | 4.404                        | 4.990                     | -1.075                  | Y ●● Y                 | Y          | 1.97 E-2                                      | 22.949                       | 23.869                    | 24.481                  | -0.914                 | Y ●    |           |                        |
|                 | <i>ABC transporter related [Methylobacillus flagellatus KT]637937032 YP_544253</i>                             |                              |                           |                         |                        |            |                                               |                              |                           |                         |                        |        |           |                        |
| <b>MFLA0142</b> | 5.66 E-2                                                                                                       | 5.087                        | 4.917                     | 6.004                   | 0.151                  | Y ●● Y     | Y                                             | 2.19 E-1                     | 23.799                    | 23.931                  | 24.866                 | -0.154 | Y ●       |                        |
|                 | <i>sigma-54 (RpoN) [Methylobacillus flagellatus KT]637937033 YP_544254</i>                                     |                              |                           |                         |                        |            |                                               |                              |                           |                         |                        |        |           |                        |
| <b>MFLA0143</b> | 7.283                                                                                                          | 6.626                        | 7.992                     | 0.534                   | Y ●● Y                 | Y          | 1.02 E-1                                      | 25.789                       | 26.253                    | 27.040                  | -0.392                 | Y ●    |           |                        |
|                 | <i>sigma 54 modulation protein/ribosomal protein S30EA [Methylobacillus flagellatus KT]637937034 YP_544255</i> |                              |                           |                         |                        |            |                                               |                              |                           |                         |                        |        |           |                        |
| <b>MFLA0144</b> | 3.656                                                                                                          | 4.769                        | 5.317                     | -0.992                  | Y ●● Y                 | Y          | 2.27 E-2                                      | 23.484                       | 24.770                    | 25.266                  | -1.499                 | Y ●    |           |                        |
|                 | <i>HPr kinase [Methylobacillus flagellatus KT]637937035 YP_544256</i>                                          |                              |                           |                         |                        |            |                                               |                              |                           |                         |                        |        |           |                        |
| <b>MFLA0145</b> | 2.521                                                                                                          | 2.334                        | 3.430                     | 1.186                   | Y ●● Y                 | Y          | 1.87 E-1                                      | 21.305                       | 21.922                    | 22.646                  | 0.603                  | Y ●    |           |                        |
|                 | <i>Uncharacterised P-loop ATPase protein UPF0042 [Methylobacillus flagellatus KT]637937036 YP_544257</i>       |                              |                           |                         |                        |            |                                               |                              |                           |                         |                        |        |           |                        |
| <b>MFLA0146</b> | 4.758                                                                                                          | 4.766                        | 5.762                     | -0.108                  | Y ●● Y                 | Y          | 1.5 E-1                                       | 24.076                       | 23.758                    | 24.926                  | 0.262                  | Y ●    |           |                        |
|                 | <i>PTS system fructose subfamily IIA component [Methylobacillus flagellatus KT]637937037 YP_544258</i>         |                              |                           |                         |                        |            |                                               |                              |                           |                         |                        |        |           |                        |
| <b>MFLA0147</b> | 3.582                                                                                                          | 3.764                        | 4.676                     | -0.757                  | Y ●● Y                 | Y          | 2.7 E-1                                       | 24.029                       | 24.064                    | 25.047                  | -0.320                 | Y ●    |           |                        |
|                 | <i>HPrNtr [Methylobacillus flagellatus KT]637937038 YP_544259</i>                                              |                              |                           |                         |                        |            |                                               |                              |                           |                         |                        |        |           |                        |
| <b>MFLA0148</b> | 4.609                                                                                                          | 3.893                        | 5.295                     | 0.636                   | Y ●● Y                 | Y          | 2.06 E-2                                      | 21.868                       | 23.080                    | 23.598                  | -1.339                 | Y ●    |           |                        |
|                 | <i>Phosphoenolpyruvate-protein phosphotransferase [Methylobacillus flagellatus KT]637937039 YP_544260</i>      |                              |                           |                         |                        |            |                                               |                              |                           |                         |                        |        |           |                        |
| <b>MFLA0149</b> |                                                                                                                | 0.000                        | 0.000                     |                         |                        | ■ ■        |                                               | 0.000                        | 0.000                     |                         |                        | ■      |           |                        |
|                 | <i>hypothetical protein [Methylobacillus flagellatus KT]637937040 YP_544261</i>                                |                              |                           |                         |                        |            |                                               |                              |                           |                         |                        |        |           |                        |
| <b>MFLA0150</b> | 7.581                                                                                                          | 7.899                        | 8.749                     | -0.318                  | Y ●● Y                 | Y          | 1.07 E-1                                      | 27.269                       | 27.472                    | 28.374                  | -0.222                 | Y ●    |           |                        |
|                 | <i>Oligopeptidase A [Methylobacillus flagellatus KT]637937041 YP_544262</i>                                    |                              |                           |                         |                        |            |                                               |                              |                           |                         |                        |        |           |                        |
| <b>MFLA0151</b> |                                                                                                                | 0.000                        | 0.000                     |                         |                        | ■ ■        |                                               | 0.000                        | 0.000                     |                         |                        | ■      |           |                        |
|                 | <i>protein of unknown function DUF1555 [Methylobacillus flagellatus KT]637937042 YP_544263</i>                 |                              |                           |                         |                        |            |                                               |                              |                           |                         |                        |        |           |                        |
| <b>MFLA0152</b> |                                                                                                                | 0.000                        | 0.000                     |                         |                        | ■ ■        |                                               | 0.000                        | 0.000                     |                         |                        | ■      |           |                        |
|                 | <i>Twin-arginine translocation pathway signal [Methylobacillus flagellatus KT]637937043 YP_544264</i>          |                              |                           |                         |                        |            |                                               |                              |                           |                         |                        |        |           |                        |
| <b>MFLA0153</b> |                                                                                                                | 0.000                        | 0.000                     |                         |                        | ■ ■        |                                               | 0.000                        | 0.000                     |                         |                        | ■      |           |                        |
|                 | <i>ABC transporter related [Methylobacillus flagellatus KT]637937044 YP_544265</i>                             |                              |                           |                         |                        |            |                                               |                              |                           |                         |                        |        |           |                        |
| <b>MFLA0154</b> |                                                                                                                | 0.000                        | 0.000                     |                         |                        | ■ ■        |                                               | 0.000                        | 0.000                     |                         |                        | ■      |           |                        |
|                 | <i>ABC transporter related [Methylobacillus flagellatus KT]637937045 YP_544266</i>                             |                              |                           |                         |                        |            |                                               |                              |                           |                         |                        |        |           |                        |

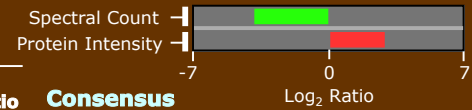



| ORF      | AM/OH <i>M. Flagellatus</i> Spectral Count                                                                          |                      |                   |                 |                |            | AM/OH <i>M. Flagellatus</i> Protein Intensity |                      |                   |                 |                |           | Spectral Count         |   | Protein Intensity |  |
|----------|---------------------------------------------------------------------------------------------------------------------|----------------------|-------------------|-----------------|----------------|------------|-----------------------------------------------|----------------------|-------------------|-----------------|----------------|-----------|------------------------|---|-------------------|--|
|          | $q$ -value                                                                                                          | $\log_2$ Methylamine | $\log_2$ Methanol | $\log_2$ Sc Sum | $\log_2$ Ratio | Regulation | $q$ -value                                    | $\log_2$ Methylamine | $\log_2$ Methanol | $\log_2$ PI Sum | $\log_2$ Ratio | Consensus | Log <sub>2</sub> Ratio |   |                   |  |
| MFLA0155 |                                                                                                                     | 0.000                | 0.000             |                 |                |            |                                               | 0.000                | 0.000             |                 |                |           |                        |   |                   |  |
|          | <i>inner-membrane translocator [Methylobacillus flagellatus KT]637937046 YP_544267</i>                              |                      |                   |                 |                |            |                                               |                      |                   |                 |                |           |                        |   |                   |  |
| MFLA0156 |                                                                                                                     | 0.000                | 0.000             |                 |                |            |                                               | 0.000                | 0.000             |                 |                |           |                        |   |                   |  |
|          | <i>inner-membrane translocator [Methylobacillus flagellatus KT]637937047 YP_544268</i>                              |                      |                   |                 |                |            |                                               |                      |                   |                 |                |           |                        |   |                   |  |
| MFLA0157 |                                                                                                                     | 0.000                | 0.000             |                 |                |            |                                               | 0.000                | 0.000             |                 |                |           |                        |   |                   |  |
|          | <i>hypothetical protein [Methylobacillus flagellatus KT]637937048 YP_544269</i>                                     |                      |                   |                 |                |            |                                               |                      |                   |                 |                |           |                        |   |                   |  |
| MFLA0158 |                                                                                                                     | 0.000                | 0.000             |                 |                |            |                                               | 0.000                | 0.000             |                 |                |           |                        |   |                   |  |
|          | <i>" putative N,N-dimethylformamidase [Methylobacillus flagellatus KT]637937049 YP_544270 ""</i>                    |                      |                   |                 |                |            |                                               |                      |                   |                 |                |           |                        |   |                   |  |
| MFLA0159 |                                                                                                                     | 0.000                | 0.000             |                 |                |            |                                               | 0.000                | 0.000             |                 |                |           |                        |   |                   |  |
|          | <i>" transcriptional regulator, LuxR family [Methylobacillus flagellatus KT]637937050 YP_544271 ""</i>              |                      |                   |                 |                |            |                                               |                      |                   |                 |                |           |                        |   |                   |  |
| MFLA0160 |                                                                                                                     | 0.000                | 0.000             |                 |                |            |                                               | 0.000                | 0.000             |                 |                |           |                        |   |                   |  |
|          | <i>YaeQ [Methylobacillus flagellatus KT]637937051 YP_544272</i>                                                     |                      |                   |                 |                |            |                                               |                      |                   |                 |                |           |                        |   |                   |  |
| MFLA0161 | 3.915                                                                                                               | 4.695                | 5.357             | -0.708          | Y              | ●●         | Y                                             | 7.63 E-2             | 23.451            | 24.372          | 24.983         | -0.792    | Y                      | ● |                   |  |
|          | <i>YbaK/prolyl-tRNA synthetase associated region [Methylobacillus flagellatus KT]637937052 YP_544273</i>            |                      |                   |                 |                |            |                                               |                      |                   |                 |                |           |                        |   |                   |  |
| MFLA0162 |                                                                                                                     | 0.000                | 0.000             |                 |                |            |                                               | 0.000                | 0.000             |                 |                |           |                        |   |                   |  |
|          | <i>alpha/beta hydrolase fold [Methylobacillus flagellatus KT]637937053 YP_544274</i>                                |                      |                   |                 |                |            |                                               |                      |                   |                 |                |           |                        |   |                   |  |
| MFLA0163 |                                                                                                                     | 0.000                | 0.000             |                 |                |            |                                               | 0.000                | 0.000             |                 |                |           |                        |   |                   |  |
|          | <i>Methyltransferase type 11 [Methylobacillus flagellatus KT]637937054 YP_544275</i>                                |                      |                   |                 |                |            |                                               |                      |                   |                 |                |           |                        |   |                   |  |
| MFLA0164 |                                                                                                                     | 0.000                | 0.000             |                 |                |            |                                               | 0.000                | 0.000             |                 |                |           |                        |   |                   |  |
|          | <i>hypothetical protein [Methylobacillus flagellatus KT]637937055 YP_544276</i>                                     |                      |                   |                 |                |            |                                               |                      |                   |                 |                |           |                        |   |                   |  |
| MFLA0165 |                                                                                                                     | 0.000                | 0.000             |                 |                |            |                                               | 0.000                | 0.000             |                 |                |           |                        |   |                   |  |
|          | <i>protein of unknown function DUF890 [Methylobacillus flagellatus KT]637937056 YP_544277</i>                       |                      |                   |                 |                |            |                                               |                      |                   |                 |                |           |                        |   |                   |  |
| MFLA0166 |                                                                                                                     | 0.000                | 0.000             |                 |                |            |                                               | 0.000                | 0.000             |                 |                |           |                        |   |                   |  |
|          | <i>ABC-2 [Methylobacillus flagellatus KT]637937057 YP_544278</i>                                                    |                      |                   |                 |                |            |                                               |                      |                   |                 |                |           |                        |   |                   |  |
| MFLA0167 | 0.521                                                                                                               | 1.825                | 2.315             | -0.153          | Y              | ●●         | Y                                             | 1.31 E-1             | 18.300            | 19.037          | 19.716         | 0.282     | Y                      | ● |                   |  |
|          | <i>response regulator receiver domain protein (CheY-like) [Methylobacillus flagellatus KT]637937058 YP_544279</i>   |                      |                   |                 |                |            |                                               |                      |                   |                 |                |           |                        |   |                   |  |
| MFLA0168 | 4.101                                                                                                               | 4.114                | 5.107             | 0.174           | Y              | ●●         | Y                                             | 2.54 E-1             | 23.240            | 23.300          | 24.270         | -0.190    | Y                      | ● |                   |  |
|          | <i>secretion protein HlyD [Methylobacillus flagellatus KT]637937059 YP_544280</i>                                   |                      |                   |                 |                |            |                                               |                      |                   |                 |                |           |                        |   |                   |  |
| MFLA0169 | 3.637                                                                                                               | 1.000                | 3.852             | 1.620           | Y              | ●●         | Y                                             | 2.45 E-1             | 21.574            | 20.435          | 22.114         | -0.046    | Y                      | ● |                   |  |
|          | <i>" RND efflux system, outer membrane lipoprotein, NodT [Methylobacillus flagellatus KT]637937060 YP_544281 ""</i> |                      |                   |                 |                |            |                                               |                      |                   |                 |                |           |                        |   |                   |  |
| MFLA0170 |                                                                                                                     | 0.000                | 0.000             |                 |                |            |                                               | 0.000                | 0.000             |                 |                |           |                        |   |                   |  |
|          | <i>" transcriptional regulator, TetR family [Methylobacillus flagellatus KT]637937061 YP_544282 ""</i>              |                      |                   |                 |                |            |                                               |                      |                   |                 |                |           |                        |   |                   |  |
| MFLA0171 | 3.521                                                                                                               | 1.000                | 3.752             | 2.521           | Y              | ●●         | Y                                             |                      | 21.803            | 17.920          | 21.898         | 3.883     | Y                      | ● |                   |  |
|          | <i>hypothetical protein [Methylobacillus flagellatus KT]637937062 YP_544283</i>                                     |                      |                   |                 |                |            |                                               |                      |                   |                 |                |           |                        |   |                   |  |
| MFLA0172 | 4.413                                                                                                               | 4.875                | 5.663             | -0.456          | Y              | ●●         | Y                                             | 1.51 E-1             | 23.455            | 23.643          | 24.552         | -0.151    | Y                      | ● |                   |  |
|          | <i>exodeoxyribonuclease III (xth) [Methylobacillus flagellatus KT]637937063 YP_544284</i>                           |                      |                   |                 |                |            |                                               |                      |                   |                 |                |           |                        |   |                   |  |
| MFLA0173 | 3.532                                                                                                               | 2.889                | 4.246             | 0.794           | Y              | ●●         | Y                                             | 1.16 E-1             | 23.482            | 24.038          | 24.787         | -0.505    | Y                      | ● |                   |  |
|          | <i>nitroreductase [Methylobacillus flagellatus KT]637937064 YP_544285</i>                                           |                      |                   |                 |                |            |                                               |                      |                   |                 |                |           |                        |   |                   |  |
| MFLA0174 | 0.813                                                                                                               |                      | 0.813             |                 | Y              | ●●         | Y                                             |                      | 20.266            |                 | 20.266         |           | Y                      | ● |                   |  |
|          | <i>hypothetical protein [Methylobacillus flagellatus KT]637937065 YP_544286</i>                                     |                      |                   |                 |                |            |                                               |                      |                   |                 |                |           |                        |   |                   |  |
| MFLA0175 |                                                                                                                     | 0.000                | 0.000             |                 |                |            |                                               | 0.000                | 0.000             |                 |                |           |                        |   |                   |  |
|          | <i>MgtC/SapB transporter [Methylobacillus flagellatus KT]637937066 YP_544287</i>                                    |                      |                   |                 |                |            |                                               |                      |                   |                 |                |           |                        |   |                   |  |
| MFLA0176 |                                                                                                                     | 0.000                | 0.000             |                 |                |            |                                               | 0.000                | 0.000             |                 |                |           |                        |   |                   |  |
|          | <i>hypothetical protein [Methylobacillus flagellatus KT]637937067 YP_544288</i>                                     |                      |                   |                 |                |            |                                               |                      |                   |                 |                |           |                        |   |                   |  |

| ORF             | AM/OH <i>M. Flagellatus</i> Spectral Count                                                                                             |                     |                   |                 |                |            | AM/OH <i>M. Flagellatus</i> Protein Intensity |                     |                   |                 |                |           | Spectral Count         |  | Protein Intensity |  |
|-----------------|----------------------------------------------------------------------------------------------------------------------------------------|---------------------|-------------------|-----------------|----------------|------------|-----------------------------------------------|---------------------|-------------------|-----------------|----------------|-----------|------------------------|--|-------------------|--|
|                 | $q$ -value                                                                                                                             | $\log_2$ Methyamine | $\log_2$ Methanol | $\log_2$ Sc Sum | $\log_2$ Ratio | Regulation | $q$ -value                                    | $\log_2$ Methyamine | $\log_2$ Methanol | $\log_2$ PI Sum | $\log_2$ Ratio | Consensus | Log <sub>2</sub> Ratio |  |                   |  |
| <b>MFLA0177</b> |                                                                                                                                        | 0.521               |                   | 0.521           |                | Y ●● Y     |                                               | 20.059              |                   | 20.059          |                | Y ●       |                        |  |                   |  |
|                 | <i>Deoxyguanosinetriphosphate triphosphohydrolase [Methylobacillus flagellatus KT]637937068 YP_544289</i>                              |                     |                   |                 |                |            |                                               |                     |                   |                 |                |           |                        |  |                   |  |
| <b>MFLA0178</b> |                                                                                                                                        | 3.307               | 1.000             | 3.573           | 1.167          | Y ●● Y     | 7.24 E-2                                      | 23.217              | 21.335            | 23.564          | 0.870          | Y ●       |                        |  |                   |  |
|                 | <i>hypothetical protein [Methylobacillus flagellatus KT]637937069 YP_544290</i>                                                        |                     |                   |                 |                |            |                                               |                     |                   |                 |                |           |                        |  |                   |  |
| <b>MFLA0179</b> |                                                                                                                                        | 0.000               | 0.000             |                 |                | ■●         |                                               | 0.000               | 0.000             |                 |                | ■         |                        |  |                   |  |
|                 | <i>MIP family channel proteins [Methylobacillus flagellatus KT]637937070 YP_544291</i>                                                 |                     |                   |                 |                |            |                                               |                     |                   |                 |                |           |                        |  |                   |  |
| <b>MFLA0180</b> |                                                                                                                                        | 0.000               | 0.000             |                 |                | ■●         |                                               | 0.000               | 0.000             |                 |                | ■         |                        |  |                   |  |
|                 | <i>protein of unknown function DUF1275 [Methylobacillus flagellatus KT]637937071 YP_544292</i>                                         |                     |                   |                 |                |            |                                               |                     |                   |                 |                |           |                        |  |                   |  |
| <b>MFLA0181</b> | 1.05 E-1                                                                                                                               | 6.110               | 6.342             | 7.231           | -0.232         | Y ●● Y     | 2.69 E-1                                      | 25.321              | 25.285            | 26.303          | -0.141         | Y ●       |                        |  |                   |  |
|                 | <i>" two component, sigma54 specific, transcriptional regulator, Fis family [Methylobacillus flagellatus KT]637937072 YP_544293 ""</i> |                     |                   |                 |                |            |                                               |                     |                   |                 |                |           |                        |  |                   |  |
| <b>MFLA0182</b> |                                                                                                                                        | 5.114               | 3.611             | 5.550           | 1.504          | Y ●● Y     | 1.21 E-1                                      | 22.693              | 22.001            | 23.388          | 0.576          | Y ●       |                        |  |                   |  |
|                 | <i>periplasmic sensor signal transduction histidine kinase [Methylobacillus flagellatus KT]637937073 YP_544294</i>                     |                     |                   |                 |                |            |                                               |                     |                   |                 |                |           |                        |  |                   |  |
| <b>MFLA0183</b> |                                                                                                                                        | 3.038               | 2.095             | 3.642           | 0.786          | Y ●● Y     | 4.09 E-2                                      | 20.965              | 22.037            | 22.598          | -1.233         | Y ●       |                        |  |                   |  |
|                 | <i>putative proline rich signal peptide protein [Methylobacillus flagellatus KT]637937074 YP_544295</i>                                |                     |                   |                 |                |            |                                               |                     |                   |                 |                |           |                        |  |                   |  |
| <b>MFLA0184</b> | 1.84 E-11                                                                                                                              | 6.411               | 4.945             | 6.856           | 1.465          | R ●● Y     | 1.69 E-1                                      | 23.967              | 23.805            | 24.888          | 0.211          | R ●       |                        |  |                   |  |
|                 | <i>sun protein [Methylobacillus flagellatus KT]637937075 YP_544296</i>                                                                 |                     |                   |                 |                |            |                                               |                     |                   |                 |                |           |                        |  |                   |  |
| <b>MFLA0185</b> |                                                                                                                                        | 4.266               | 2.816             | 4.716           | 1.245          | Y ●● Y     | 7.19 E-2                                      | 24.267              | 23.223            | 24.838          | 1.137          | Y ●       |                        |  |                   |  |
|                 | <i>" peptidase M48, Ste24p [Methylobacillus flagellatus KT]637937076 YP_544297 ""</i>                                                  |                     |                   |                 |                |            |                                               |                     |                   |                 |                |           |                        |  |                   |  |
| <b>MFLA0186</b> | 7.33 E-2                                                                                                                               | 4.828               | 5.065             | 5.952           | -0.218         | Y ●● Y     | 2.02 E-1                                      | 23.493              | 23.721            | 24.612          | -0.446         | Y ●       |                        |  |                   |  |
|                 | <i>methionyl-tRNA formyltransferase [Methylobacillus flagellatus KT]637937077 YP_544298</i>                                            |                     |                   |                 |                |            |                                               |                     |                   |                 |                |           |                        |  |                   |  |
| <b>MFLA0187</b> | 1.44 E-1                                                                                                                               | 4.587               | 5.217             | 5.936           | -0.802         | Y ●● Y     | 2.21 E-1                                      | 24.298              | 24.510            | 25.408          | -0.637         | Y ●       |                        |  |                   |  |
|                 | <i>Peptide deformylase [Methylobacillus flagellatus KT]637937078 YP_544299</i>                                                         |                     |                   |                 |                |            |                                               |                     |                   |                 |                |           |                        |  |                   |  |
| <b>MFLA0188</b> |                                                                                                                                        | 6.223               | 5.688             | 6.980           | 0.531          | Y ●● Y     | 2.73 E-1                                      | 25.671              | 25.650            | 26.661          | -0.047         | Y ●       |                        |  |                   |  |
|                 | <i>Peptidoglycan-binding LysM [Methylobacillus flagellatus KT]637937079 YP_544300</i>                                                  |                     |                   |                 |                |            |                                               |                     |                   |                 |                |           |                        |  |                   |  |
| <b>MFLA0189</b> |                                                                                                                                        | 1.106               |                   | 1.106           |                | Y ●● Y     |                                               | 18.772              |                   | 18.772          |                | Y ●       |                        |  |                   |  |
|                 | <i>" DNA processing protein DprA, putative [Methylobacillus flagellatus KT]637937080 YP_544301 ""</i>                                  |                     |                   |                 |                |            |                                               |                     |                   |                 |                |           |                        |  |                   |  |
| <b>MFLA0190</b> |                                                                                                                                        | 0.000               | 0.000             |                 |                | ■●         |                                               | 0.000               | 0.000             |                 |                | ■         |                        |  |                   |  |
|                 | <i>protein of unknown function DUF494 [Methylobacillus flagellatus KT]637937081 YP_544302</i>                                          |                     |                   |                 |                |            |                                               |                     |                   |                 |                |           |                        |  |                   |  |
| <b>MFLA0191</b> | 3.4 E-16                                                                                                                               | 6.201               | 7.326             | 7.870           | -1.210         | G ●● G     | 8.35 E-3                                      | 25.048              | 26.504            | 26.952          | -1.449         | G ●       |                        |  |                   |  |
|                 | <i>" 5,10-methylenetetrahydrofolate reductase [Methylobacillus flagellatus KT]637937082 YP_544303 ""</i>                               |                     |                   |                 |                |            |                                               |                     |                   |                 |                |           |                        |  |                   |  |
| <b>MFLA0192</b> |                                                                                                                                        | 0.000               | 0.000             |                 |                | ■●         |                                               | 0.000               | 0.000             |                 |                | ■         |                        |  |                   |  |
|                 | <i>membrane protein of unknown function [Methylobacillus flagellatus KT]637937083 YP_544304</i>                                        |                     |                   |                 |                |            |                                               |                     |                   |                 |                |           |                        |  |                   |  |
| <b>MFLA0193</b> | 0                                                                                                                                      | 9.243               | 9.611             | 10.439          | -0.414         | Y ●● Y     | 4.29 E-2                                      | 29.142              | 29.675            | 30.433          | -0.574         | Y ●       |                        |  |                   |  |
|                 | <i>adenosylhomocysteinase [Methylobacillus flagellatus KT]637937084 YP_544305</i>                                                      |                     |                   |                 |                |            |                                               |                     |                   |                 |                |           |                        |  |                   |  |
| <b>MFLA0194</b> |                                                                                                                                        | 8.175               | 8.311             | 9.244           | -0.160         | Y ●● Y     | 3.23 E-2                                      | 28.043              | 28.873            | 29.517          | -0.920         | Y ●       |                        |  |                   |  |
|                 | <i>Methionine adenosyltransferase [Methylobacillus flagellatus KT]637937085 YP_544306</i>                                              |                     |                   |                 |                |            |                                               |                     |                   |                 |                |           |                        |  |                   |  |
| <b>MFLA0195</b> |                                                                                                                                        | 2.980               | 3.616             | 4.333           | 0.457          | Y ●● Y     | 3.27 E-2                                      | 21.849              | 21.684            | 22.768          | 1.171          | Y ●       |                        |  |                   |  |
|                 | <i>lipid A biosynthesis acyltransferase [Methylobacillus flagellatus KT]637937086 YP_544307</i>                                        |                     |                   |                 |                |            |                                               |                     |                   |                 |                |           |                        |  |                   |  |
| <b>MFLA0196</b> |                                                                                                                                        | 3.386               | 3.385             | 4.386           | -0.006         | Y ●● Y     | 2.72 E-1                                      | 22.261              | 22.281            | 23.271          | -0.068         | Y ●       |                        |  |                   |  |
|                 | <i>Diaminopimelate epimerase [Methylobacillus flagellatus KT]637937087 YP_544308</i>                                                   |                     |                   |                 |                |            |                                               |                     |                   |                 |                |           |                        |  |                   |  |
| <b>MFLA0197</b> |                                                                                                                                        | 5.096               | 5.704             | 6.432           | -0.701         | Y ●● Y     | 8.46 E-2                                      | 25.561              | 26.283            | 26.967          | -0.987         | Y ●       |                        |  |                   |  |
|                 | <i>protein of unknown function DUF484 [Methylobacillus flagellatus KT]637937088 YP_544309</i>                                          |                     |                   |                 |                |            |                                               |                     |                   |                 |                |           |                        |  |                   |  |
| <b>MFLA0198</b> |                                                                                                                                        | 0.000               | 0.000             |                 |                | ■●         |                                               | 0.000               | 0.000             |                 |                | ■         |                        |  |                   |  |
|                 | <i>Tyrosine recombinase XerC [Methylobacillus flagellatus KT]637937089 YP_544310</i>                                                   |                     |                   |                 |                |            |                                               |                     |                   |                 |                |           |                        |  |                   |  |

| ORF             | AM/OH <i>M. Flagellatus</i> Spectral Count                                                                                            |                              |                           |                         |                        | AM/OH <i>M. Flagellatus</i> Protein Intensity |          |                              |                           |                         | Spectral Count         |           | Protein Intensity      |  |  |
|-----------------|---------------------------------------------------------------------------------------------------------------------------------------|------------------------------|---------------------------|-------------------------|------------------------|-----------------------------------------------|----------|------------------------------|---------------------------|-------------------------|------------------------|-----------|------------------------|--|--|
|                 | q-value                                                                                                                               | log <sub>2</sub> Methylamine | log <sub>2</sub> Methanol | log <sub>2</sub> Sc Sum | log <sub>2</sub> Ratio | Regulation                                    | q-value  | log <sub>2</sub> Methylamine | log <sub>2</sub> Methanol | log <sub>2</sub> PI Sum | log <sub>2</sub> Ratio | Consensus | Log <sub>2</sub> Ratio |  |  |
| <b>MFLA0199</b> |                                                                                                                                       | 3.135                        | 3.240                     | 4.189                   | 0.897                  | Y ●● Y                                        | 5.65 E-2 | 18.605                       | 22.347                    | 22.451                  | -2.723                 | Y ●       |                        |  |  |
|                 | <i>molybdenum cofactor biosynthesis protein C [Methylobacillus flagellatus KT]637937090 YP_544311</i>                                 |                              |                           |                         |                        |                                               |          |                              |                           |                         |                        |           |                        |  |  |
| <b>MFLA0200</b> |                                                                                                                                       | 2.106                        | 1.585                     | 2.869                   | 0.521                  | Y ●● Y                                        |          | 20.801                       | 20.685                    | 21.744                  | 0.115                  | Y ●       |                        |  |  |
|                 | <i>"peptidase M48, Ste24p [Methylobacillus flagellatus KT]637937091 YP_544312 ""</i>                                                  |                              |                           |                         |                        |                                               |          |                              |                           |                         |                        |           |                        |  |  |
| <b>MFLA0201</b> |                                                                                                                                       | 0.000                        | 0.000                     |                         |                        | ■ ■                                           |          | 0.000                        | 0.000                     |                         |                        | ■         |                        |  |  |
|                 | <i>"transmembrane proetin, twin-arginine translocation pathway signal [Methylobacillus flagellatus KT]637937092 YP_544313 ""</i>      |                              |                           |                         |                        |                                               |          |                              |                           |                         |                        |           |                        |  |  |
| <b>MFLA0202</b> |                                                                                                                                       | 0.000                        | 0.000                     |                         |                        | ■ ■                                           |          | 0.000                        | 0.000                     |                         |                        | ■         |                        |  |  |
|                 | <i>hypothetical protein [Methylobacillus flagellatus KT]637937093 YP_544314</i>                                                       |                              |                           |                         |                        |                                               |          |                              |                           |                         |                        |           |                        |  |  |
| <b>MFLA0203</b> |                                                                                                                                       | 8.168                        | 7.896                     | 9.038                   | 0.175                  | Y ●● Y                                        | 2.58 E-1 | 27.470                       | 27.508                    | 28.489                  | -0.016                 | Y ●       |                        |  |  |
|                 | <i>"Alcohol dehydrogenase, zinc-binding [Methylobacillus flagellatus KT]637937094 YP_544315 ""</i>                                    |                              |                           |                         |                        |                                               |          |                              |                           |                         |                        |           |                        |  |  |
| <b>MFLA0204</b> |                                                                                                                                       | 2.307                        | 2.700                     | 3.517                   | -1.533                 | Y ●● Y                                        | 1.53 E-2 | 21.965                       | 22.903                    | 23.509                  | -1.940                 | Y ●       |                        |  |  |
|                 | <i>"Chromosomal replication initiator, DnaA [Methylobacillus flagellatus KT]637937095 YP_544316 ""</i>                                |                              |                           |                         |                        |                                               |          |                              |                           |                         |                        |           |                        |  |  |
| <b>MFLA0205</b> |                                                                                                                                       | 0                            | 6.311                     | 8.244                   | 8.579                  | G ●● G                                        | 7.38 E-3 | 25.196                       | 26.143                    | 26.746                  | -0.955                 | G ●       |                        |  |  |
|                 | <i>phosphoribosylformylglycinamide cyclo-ligase [Methylobacillus flagellatus KT]637937096 YP_544317</i>                               |                              |                           |                         |                        |                                               |          |                              |                           |                         |                        |           |                        |  |  |
| <b>MFLA0206</b> |                                                                                                                                       | 1.43 E-7                     | 6.298                     | 5.210                   | 6.854                  | R ●● Y                                        | 7.93 E-2 | 24.296                       | 23.694                    | 25.027                  | 0.541                  | R ●       |                        |  |  |
|                 | <i>hypothetical protein [Methylobacillus flagellatus KT]637937097 YP_544318</i>                                                       |                              |                           |                         |                        |                                               |          |                              |                           |                         |                        |           |                        |  |  |
| <b>MFLA0207</b> |                                                                                                                                       | 0.000                        | 0.000                     |                         |                        | ■ ■                                           |          | 0.000                        | 0.000                     |                         |                        | ■         |                        |  |  |
|                 | <i>hypothetical protein [Methylobacillus flagellatus KT]637937098 YP_544319</i>                                                       |                              |                           |                         |                        |                                               |          |                              |                           |                         |                        |           |                        |  |  |
| <b>MFLA0208</b> |                                                                                                                                       | 1.68 E-3                     | 5.505                     | 6.183                   | 6.883                  | G ●● Y                                        | 2.09 E-2 | 24.547                       | 26.025                    | 26.467                  | -1.461                 | G ●       |                        |  |  |
|                 | <i>Fmu (Sun) [Methylobacillus flagellatus KT]637937099 YP_544320</i>                                                                  |                              |                           |                         |                        |                                               |          |                              |                           |                         |                        |           |                        |  |  |
| <b>MFLA0209</b> |                                                                                                                                       | 0.000                        | 0.000                     |                         |                        | ■ ■                                           |          | 0.000                        | 0.000                     |                         |                        | ■         |                        |  |  |
|                 | <i>sodium:dicarboxylate symporter [Methylobacillus flagellatus KT]637937100 YP_544321</i>                                             |                              |                           |                         |                        |                                               |          |                              |                           |                         |                        |           |                        |  |  |
| <b>MFLA0210</b> |                                                                                                                                       | 7.689                        | 7.878                     | 8.787                   | -0.091                 | Y ●● Y                                        | 1.46 E-1 | 29.556                       | 30.168                    | 30.894                  | -0.587                 | Y ●       |                        |  |  |
|                 | <i>blue (type 1) copper domain [Methylobacillus flagellatus KT]637937101 YP_544322</i>                                                |                              |                           |                         |                        |                                               |          |                              |                           |                         |                        |           |                        |  |  |
| <b>MFLA0211</b> |                                                                                                                                       | 4.362                        | 2.897                     | 4.808                   | 0.912                  | Y ●● Y                                        | 5.8 E-2  | 22.302                       | 20.511                    | 22.669                  | 1.663                  | Y ●       |                        |  |  |
|                 | <i>acriflavin resistance protein [Methylobacillus flagellatus KT]637937102 YP_544323</i>                                              |                              |                           |                         |                        |                                               |          |                              |                           |                         |                        |           |                        |  |  |
| <b>MFLA0212</b> |                                                                                                                                       | 4.824                        | 4.444                     | 5.647                   | 0.381                  | Y ●● Y                                        | 3.45 E-2 | 23.854                       | 25.151                    | 25.644                  | -1.305                 | Y ●       |                        |  |  |
|                 | <i>secretion protein HlyD [Methylobacillus flagellatus KT]637937103 YP_544324</i>                                                     |                              |                           |                         |                        |                                               |          |                              |                           |                         |                        |           |                        |  |  |
| <b>MFLA0213</b> |                                                                                                                                       | 1.398                        |                           | 1.398                   |                        | Y ●● Y                                        |          | 19.129                       |                           | 19.129                  |                        | Y ●       |                        |  |  |
|                 | <i>"negative regulator of AmpC, AmpD [Methylobacillus flagellatus KT]637937104 YP_544325 ""</i>                                       |                              |                           |                         |                        |                                               |          |                              |                           |                         |                        |           |                        |  |  |
| <b>MFLA0214</b> |                                                                                                                                       | 1.07 E-2                     | 4.816                     | 5.432                   | 6.157                  | Y ●● Y                                        | 4.87 E-2 | 23.389                       | 24.062                    | 24.764                  | -0.772                 | Y ●       |                        |  |  |
|                 | <i>"two component, sigma54 specific, transcriptional regulator, Fis family [Methylobacillus flagellatus KT]637937105 YP_544326 ""</i> |                              |                           |                         |                        |                                               |          |                              |                           |                         |                        |           |                        |  |  |
| <b>MFLA0215</b> |                                                                                                                                       | 1.843                        | 3.759                     | 4.098                   | -0.784                 | Y ●● Y                                        | 1.07 E-1 | 19.660                       | 21.927                    | 22.199                  | -1.185                 | Y ●       |                        |  |  |
|                 | <i>periplasmic sensor signal transduction histidine kinase [Methylobacillus flagellatus KT]637937106 YP_544327</i>                    |                              |                           |                         |                        |                                               |          |                              |                           |                         |                        |           |                        |  |  |
| <b>MFLA0216</b> |                                                                                                                                       | 0.000                        | 0.000                     |                         |                        | ■ ■                                           |          | 0.000                        | 0.000                     |                         |                        | ■         |                        |  |  |
|                 | <i>hypothetical protein [Methylobacillus flagellatus KT]637937107 YP_544328</i>                                                       |                              |                           |                         |                        |                                               |          |                              |                           |                         |                        |           |                        |  |  |
| <b>MFLA0217</b> |                                                                                                                                       | 0.000                        | 0.000                     |                         |                        | ■ ■                                           |          | 0.000                        | 0.000                     |                         |                        | ■         |                        |  |  |
|                 | <i>sigma-24 (FecI-like) [Methylobacillus flagellatus KT]637937108 YP_544329</i>                                                       |                              |                           |                         |                        |                                               |          |                              |                           |                         |                        |           |                        |  |  |
| <b>MFLA0218</b> |                                                                                                                                       | 0.000                        | 0.000                     |                         |                        | ■ ■                                           |          | 0.000                        | 0.000                     |                         |                        | ■         |                        |  |  |
|                 | <i>putative transmembrane protein [Methylobacillus flagellatus KT]637937109 YP_544330</i>                                             |                              |                           |                         |                        |                                               |          |                              |                           |                         |                        |           |                        |  |  |
| <b>MFLA0219</b> |                                                                                                                                       | 3.674                        | 3.458                     | 4.570                   | 0.264                  | Y ●● Y                                        | 2.41 E-2 | 20.500                       | 21.395                    | 22.016                  | -0.881                 | Y ●       |                        |  |  |
|                 | <i>hypothetical protein [Methylobacillus flagellatus KT]637937110 YP_544331</i>                                                       |                              |                           |                         |                        |                                               |          |                              |                           |                         |                        |           |                        |  |  |
| <b>MFLA0220</b> |                                                                                                                                       | 0.000                        | 0.000                     |                         |                        | ■ ■                                           |          | 0.000                        | 0.000                     |                         |                        | ■         |                        |  |  |
|                 | <i>permease YjgP/YjgQ [Methylobacillus flagellatus KT]637937111 YP_544332</i>                                                         |                              |                           |                         |                        |                                               |          |                              |                           |                         |                        |           |                        |  |  |

| ORF             | AM/OH <i>M. Flagellatus</i> Spectral Count                                                                           |                              |                           |                         |                        |            | AM/OH <i>M. Flagellatus</i> Protein Intensity |                              |                           |                         |                        |                        | Consensus | Spectral Count |   | Protein Intensity |  |
|-----------------|----------------------------------------------------------------------------------------------------------------------|------------------------------|---------------------------|-------------------------|------------------------|------------|-----------------------------------------------|------------------------------|---------------------------|-------------------------|------------------------|------------------------|-----------|----------------|---|-------------------|--|
|                 | $\phi$ -value                                                                                                        | log <sub>2</sub> Methylamine | log <sub>2</sub> Methanol | log <sub>2</sub> Sc Sum | log <sub>2</sub> Ratio | Regulation | $\phi$ -value                                 | log <sub>2</sub> Methylamine | log <sub>2</sub> Methanol | log <sub>2</sub> PI Sum | log <sub>2</sub> Ratio | Log <sub>2</sub> Ratio |           | -7             | 0 | 7                 |  |
| <b>MFLA0221</b> |                                                                                                                      | 1.521                        | 2.807                     | 3.303                   | -1.287                 | Y ●● Y     |                                               | 21.774                       | 22.062                    | 22.925                  | -0.289                 | Y ●                    |           |                |   |                   |  |
|                 | <i>permease YjgP/YjgQ [Methylobacillus flagellatus KT]637937112 YP_544333</i>                                        |                              |                           |                         |                        |            |                                               |                              |                           |                         |                        |                        |           |                |   |                   |  |
| <b>MFLA0222</b> |                                                                                                                      | 8.246                        | 8.129                     | 9.189                   | -0.002                 | Y ●● Y     |                                               | 2.42 E-1                     | 28.232                    | 28.186                  | 29.210                 | 0.012                  | Y ●       |                |   |                   |  |
|                 | <i>Leucyl aminopeptidase [Methylobacillus flagellatus KT]637937113 YP_544334</i>                                     |                              |                           |                         |                        |            |                                               |                              |                           |                         |                        |                        |           |                |   |                   |  |
| <b>MFLA0223</b> |                                                                                                                      |                              | 0.000                     | 0.000                   |                        | Y ●● Y     |                                               |                              | 18.790                    | 18.790                  |                        | Y ●                    |           |                |   |                   |  |
|                 | <i>" DNA polymerase III chi subunit, HoIC [Methylobacillus flagellatus KT]637937114 YP_544335 ""</i>                 |                              |                           |                         |                        |            |                                               |                              |                           |                         |                        |                        |           |                |   |                   |  |
| <b>MFLA0224</b> |                                                                                                                      | 4.53 E-4                     | 5.816                     | 4.997                   | 6.464                  | 0.872      | R ●● Y                                        | 1.67 E-1                     | 22.333                    | 21.713                  | 23.056                 | 0.331                  | R ●       |                |   |                   |  |
|                 | <i>hypothetical protein [Methylobacillus flagellatus KT]637937115 YP_544336</i>                                      |                              |                           |                         |                        |            |                                               |                              |                           |                         |                        |                        |           |                |   |                   |  |
| <b>MFLA0225</b> |                                                                                                                      | 0.000                        | 0.000                     |                         |                        | ●●         |                                               | 0.000                        | 0.000                     |                         |                        | ●                      |           |                |   |                   |  |
|                 | <i>glycine cleavage system H protein [Methylobacillus flagellatus KT]637937116 YP_544337</i>                         |                              |                           |                         |                        |            |                                               |                              |                           |                         |                        |                        |           |                |   |                   |  |
| <b>MFLA0226</b> |                                                                                                                      | 0.000                        | 0.000                     |                         |                        | ●●         |                                               | 0.000                        | 0.000                     |                         |                        | ●                      |           |                |   |                   |  |
|                 | <i>" peptidase S11, D-alanyl-D-alanine carboxypeptidase 1 [Methylobacillus flagellatus KT]637937117 YP_544338 ""</i> |                              |                           |                         |                        |            |                                               |                              |                           |                         |                        |                        |           |                |   |                   |  |
| <b>MFLA0227</b> |                                                                                                                      | 4.16 E-2                     | 7.382                     | 7.339                   | 8.361                  | 0.021      | Y ●● Y                                        | 2.25 E-2                     | 26.344                    | 27.053                  | 27.742                 | -0.717                 | Y ●       |                |   |                   |  |
|                 | <i>DNA topoisomerase [Methylobacillus flagellatus KT]637937118 YP_544339</i>                                         |                              |                           |                         |                        |            |                                               |                              |                           |                         |                        |                        |           |                |   |                   |  |
| <b>MFLA0228</b> |                                                                                                                      | 4.179                        | 2.471                     | 4.564                   | 1.712                  | Y ●● Y     |                                               | 5.48 E-2                     | 22.188                    | 21.929                  | 23.064                 | 0.271                  | Y ●       |                |   |                   |  |
|                 | <i>PP-loop [Methylobacillus flagellatus KT]637937119 YP_544340</i>                                                   |                              |                           |                         |                        |            |                                               |                              |                           |                         |                        |                        |           |                |   |                   |  |
| <b>MFLA0229</b> |                                                                                                                      | 4.080                        | 4.930                     | 5.567                   | -0.901                 | Y ●● Y     |                                               | 4.59 E-2                     | 23.167                    | 23.914                  | 24.588                 | -0.855                 | Y ●       |                |   |                   |  |
|                 | <i>short-chain dehydrogenase/reductase SDR [Methylobacillus flagellatus KT]637937120 YP_544341</i>                   |                              |                           |                         |                        |            |                                               |                              |                           |                         |                        |                        |           |                |   |                   |  |
| <b>MFLA0230</b> |                                                                                                                      |                              | 1.710                     | 1.710                   |                        | Y ●● Y     |                                               |                              | 21.241                    | 21.241                  |                        | Y ●                    |           |                |   |                   |  |
|                 | <i>protein of unknown function DUF185 [Methylobacillus flagellatus KT]637937121 YP_544342</i>                        |                              |                           |                         |                        |            |                                               |                              |                           |                         |                        |                        |           |                |   |                   |  |
| <b>MFLA0231</b> |                                                                                                                      | 0.000                        | 0.000                     |                         |                        | ●●         |                                               | 0.000                        | 0.000                     |                         |                        | ●                      |           |                |   |                   |  |
|                 | <i>hypothetical protein [Methylobacillus flagellatus KT]637937122 YP_544343</i>                                      |                              |                           |                         |                        |            |                                               |                              |                           |                         |                        |                        |           |                |   |                   |  |
| <b>MFLA0232</b> |                                                                                                                      | 4.556                        | 4.972                     | 5.779                   | -0.543                 | Y ●● Y     |                                               | 1.14 E-1                     | 23.401                    | 24.201                  | 24.856                 | -2.078                 | Y ●       |                |   |                   |  |
|                 | <i>" GTP-binding protein, HSR1-related [Methylobacillus flagellatus KT]637937123 YP_544344 ""</i>                    |                              |                           |                         |                        |            |                                               |                              |                           |                         |                        |                        |           |                |   |                   |  |
| <b>MFLA0233</b> |                                                                                                                      | 5.055                        | 3.788                     | 5.556                   | 0.976                  | Y ●● Y     |                                               | 2.03 E-1                     | 23.719                    | 23.311                  | 24.530                 | 0.155                  | Y ●       |                |   |                   |  |
|                 | <i>ResB-like protein [Methylobacillus flagellatus KT]637937124 YP_544345</i>                                         |                              |                           |                         |                        |            |                                               |                              |                           |                         |                        |                        |           |                |   |                   |  |
| <b>MFLA0234</b> |                                                                                                                      | 0.000                        | 0.000                     |                         |                        | ●●         |                                               | 0.000                        | 0.000                     |                         |                        | ●                      |           |                |   |                   |  |
|                 | <i>cytochrome c assembly protein [Methylobacillus flagellatus KT]637937125 YP_544346</i>                             |                              |                           |                         |                        |            |                                               |                              |                           |                         |                        |                        |           |                |   |                   |  |
| <b>MFLA0235</b> |                                                                                                                      | 3.364                        | 2.322                     | 3.935                   | 0.041                  | Y ●● Y     |                                               | 8.39 E-2                     | 20.933                    | 20.340                  | 21.667                 | -0.417                 | Y ●       |                |   |                   |  |
|                 | <i>" ATP-binding region, ATPase-like protein [Methylobacillus flagellatus KT]637937126 YP_544347 ""</i>              |                              |                           |                         |                        |            |                                               |                              |                           |                         |                        |                        |           |                |   |                   |  |
| <b>MFLA0236</b> |                                                                                                                      | 2.99 E-2                     | 5.201                     | 5.219                   | 6.210                  | -0.081     | Y ●● Y                                        | 2.72 E-1                     | 24.670                    | 24.644                  | 25.657                 | 0.046                  | Y ●       |                |   |                   |  |
|                 | <i>methylation [Methylobacillus flagellatus KT]637937127 YP_544348</i>                                               |                              |                           |                         |                        |            |                                               |                              |                           |                         |                        |                        |           |                |   |                   |  |
| <b>MFLA0237</b> |                                                                                                                      | 5.277                        | 4.485                     | 5.935                   | 0.907                  | Y ●● Y     |                                               | 4.29 E-2                     | 22.209                    | 23.774                  | 24.194                 | -1.707                 | Y ●       |                |   |                   |  |
|                 | <i>ABC transporter related [Methylobacillus flagellatus KT]637937128 YP_544349</i>                                   |                              |                           |                         |                        |            |                                               |                              |                           |                         |                        |                        |           |                |   |                   |  |
| <b>MFLA0238</b> |                                                                                                                      | 0.000                        | 0.000                     |                         |                        | ●●         |                                               | 0.000                        | 0.000                     |                         |                        | ●                      |           |                |   |                   |  |
|                 | <i>protein of unknown function DUF140 [Methylobacillus flagellatus KT]637937129 YP_544350</i>                        |                              |                           |                         |                        |            |                                               |                              |                           |                         |                        |                        |           |                |   |                   |  |
| <b>MFLA0239</b> |                                                                                                                      | 6.460                        | 6.194                     | 7.333                   | 0.163                  | Y ●● Y     |                                               | 2.7 E-1                      | 25.540                    | 25.510                  | 26.525                 | -0.000                 | Y ●       |                |   |                   |  |
|                 | <i>Mammalian cell entry related [Methylobacillus flagellatus KT]637937130 YP_544351</i>                              |                              |                           |                         |                        |            |                                               |                              |                           |                         |                        |                        |           |                |   |                   |  |
| <b>MFLA0240</b> |                                                                                                                      | 1.16 E-2                     | 6.284                     | 6.176                   | 7.231                  | 0.194      | Y ●● Y                                        | 9.56 E-2                     | 27.283                    | 27.891                  | 28.619                 | -0.608                 | Y ●       |                |   |                   |  |
|                 | <i>toluene tolerance [Methylobacillus flagellatus KT]637937131 YP_544352</i>                                         |                              |                           |                         |                        |            |                                               |                              |                           |                         |                        |                        |           |                |   |                   |  |
| <b>MFLA0241</b> |                                                                                                                      | 0.000                        | 0.000                     |                         |                        | ●●         |                                               | 0.000                        | 0.000                     |                         |                        | ●                      |           |                |   |                   |  |
|                 | <i>STAS domain [Methylobacillus flagellatus KT]637937132 YP_544353</i>                                               |                              |                           |                         |                        |            |                                               |                              |                           |                         |                        |                        |           |                |   |                   |  |
| <b>MFLA0242</b> |                                                                                                                      | 4.210                        | 3.385                     | 4.856                   | 0.798                  | Y ●● Y     |                                               | 1.9 E-1                      | 22.269                    | 22.650                  | 23.472                 | -0.553                 | Y ●       |                |   |                   |  |
|                 | <i>ABC transporter related [Methylobacillus flagellatus KT]637937133 YP_544354</i>                                   |                              |                           |                         |                        |            |                                               |                              |                           |                         |                        |                        |           |                |   |                   |  |

| ORF             | AM/OH <i>M. Flagellatus</i> Spectral Count                                                                                                |                      |                   |                 |                |            | AM/OH <i>M. Flagellatus</i> Protein Intensity |                      |                   |                 |                |                        | Consensus | Spectral Count |   | Protein Intensity |  |
|-----------------|-------------------------------------------------------------------------------------------------------------------------------------------|----------------------|-------------------|-----------------|----------------|------------|-----------------------------------------------|----------------------|-------------------|-----------------|----------------|------------------------|-----------|----------------|---|-------------------|--|
|                 | $q$ -value                                                                                                                                | $\log_2$ Methylamine | $\log_2$ Methanol | $\log_2$ Sc Sum | $\log_2$ Ratio | Regulation | $q$ -value                                    | $\log_2$ Methylamine | $\log_2$ Methanol | $\log_2$ PI Sum | $\log_2$ Ratio | Log <sub>2</sub> Ratio |           | -7             | 0 | 7                 |  |
| <b>MFLA0243</b> |                                                                                                                                           | 0.000                | 0.000             |                 |                |            |                                               | 0.000                | 0.000             |                 |                |                        |           |                |   |                   |  |
|                 | <i>ABC-2 [Methylobacillus flagellatus KT]637937134 YP_544355</i>                                                                          |                      |                   |                 |                |            |                                               |                      |                   |                 |                |                        |           |                |   |                   |  |
| <b>MFLA0244</b> |                                                                                                                                           | 2.502                | 2.941             | 3.738           | -0.460         | Y ●● Y     |                                               | 6.85 E-2             | 22.875            | 23.303          | 24.105         | -0.437                 | Y ●●      |                |   |                   |  |
|                 | <i>BolA-like protein [Methylobacillus flagellatus KT]637937135 YP_544356</i>                                                              |                      |                   |                 |                |            |                                               |                      |                   |                 |                |                        |           |                |   |                   |  |
| <b>MFLA0245</b> |                                                                                                                                           | 6.347                | 5.974             | 7.173           | 0.178          | Y ●● Y     |                                               | 2.32 E-1             | 27.037            | 27.136          | 28.088         | -0.198                 | Y ●●      |                |   |                   |  |
|                 | <i>Glutaredoxin-related protein [Methylobacillus flagellatus KT]637937136 YP_544357</i>                                                   |                      |                   |                 |                |            |                                               |                      |                   |                 |                |                        |           |                |   |                   |  |
| <b>MFLA0246</b> |                                                                                                                                           | 4.46 E-2             | 5.214             | 5.207           | 6.210          | Y ●● Y     |                                               | 1.61 E-2             | 23.315            | 24.137          | 24.784         | -0.815                 | Y ●●      |                |   |                   |  |
|                 | <i>UDP-N-acetylglucosamine 1-carboxyvinyltransferase [Methylobacillus flagellatus KT]637937137 YP_544358</i>                              |                      |                   |                 |                |            |                                               |                      |                   |                 |                |                        |           |                |   |                   |  |
| <b>MFLA0247</b> |                                                                                                                                           | 1.11 E-2             | 5.298             | 5.760           | 6.548          | Y ●● G     |                                               | 8.62 E-3             | 23.852            | 25.361          | 25.795         | -1.501                 | G ●●      |                |   |                   |  |
|                 | <i>ATP phosphoribosyltransferase [Methylobacillus flagellatus KT]637937138 YP_544359</i>                                                  |                      |                   |                 |                |            |                                               |                      |                   |                 |                |                        |           |                |   |                   |  |
| <b>MFLA0248</b> |                                                                                                                                           | 1.47 E-7             | 7.342             | 7.922           | 8.661          | G ●● Y     |                                               | 4.29 E-2             | 26.948            | 27.502          | 28.252         | -0.564                 | G ●●      |                |   |                   |  |
|                 | <i>Histidinol dehydrogenase [Methylobacillus flagellatus KT]637937139 YP_544360</i>                                                       |                      |                   |                 |                |            |                                               |                      |                   |                 |                |                        |           |                |   |                   |  |
| <b>MFLA0249</b> |                                                                                                                                           | 1.56 E-3             | 4.783             | 5.674           | 6.296          | G ●● G     |                                               | 6.36 E-3             | 23.691            | 24.314          | 25.036         | -0.625                 | G ●●      |                |   |                   |  |
|                 | <i>histidinol-phosphate aminotransferase [Methylobacillus flagellatus KT]637937140 YP_544361</i>                                          |                      |                   |                 |                |            |                                               |                      |                   |                 |                |                        |           |                |   |                   |  |
| <b>MFLA0250</b> | 0                                                                                                                                         | 11.768               | 12.040            | 12.910          | -0.274         | Y ●● Y     |                                               | 1.69 E-3             | 31.314            | 31.760          | 32.554         | -0.446                 | Y ●●      |                |   |                   |  |
|                 | <i>Orotidine 5'-phosphate decarboxylase [Methylobacillus flagellatus KT]637937141 YP_544362</i>                                           |                      |                   |                 |                |            |                                               |                      |                   |                 |                |                        |           |                |   |                   |  |
| <b>MFLA0251</b> |                                                                                                                                           | 2.28 E-2             | 5.084             | 5.665           | 6.404          | Y ●● Y     |                                               | 2.56 E-2             | 23.418            | 24.198          | 24.860         | -0.768                 | Y ●●      |                |   |                   |  |
|                 | <i>Imidazoleglycerol-phosphate dehydratase [Methylobacillus flagellatus KT]637937142 YP_544363</i>                                        |                      |                   |                 |                |            |                                               |                      |                   |                 |                |                        |           |                |   |                   |  |
| <b>MFLA0252</b> |                                                                                                                                           | 3.619                | 3.488             | 4.555           | 0.070          | Y ●● Y     |                                               | 2.2 E-1              | 23.988            | 23.927          | 24.958         | 0.075                  | Y ●●      |                |   |                   |  |
|                 | <i>" imidazole glycerol phosphate synthase, glutamine amidotransferase subunit [Methylobacillus flagellatus KT]637937143 YP_544364 ""</i> |                      |                   |                 |                |            |                                               |                      |                   |                 |                |                        |           |                |   |                   |  |
| <b>MFLA0253</b> |                                                                                                                                           | 2.12 E-12            | 6.849             | 7.730           | 8.356          | G ●● Y     |                                               | 1.08 E-2             | 26.134            | 26.856          | 27.540         | -0.732                 | G ●●      |                |   |                   |  |
|                 | <i>Phosphoribosylformimino-5-aminoimidazole carboxamide ribotide isomerase [Methylobacillus flagellatus KT]637937144 YP_544365</i>        |                      |                   |                 |                |            |                                               |                      |                   |                 |                |                        |           |                |   |                   |  |
| <b>MFLA0254</b> |                                                                                                                                           | 1.03 E-1             | 5.156             | 5.462           | 6.317          | Y ●● Y     |                                               | 1.26 E-1             | 24.624            | 24.934          | 25.787         | -0.353                 | Y ●●      |                |   |                   |  |
|                 | <i>" imidazoleglycerol phosphate synthase, cyclase subunit [Methylobacillus flagellatus KT]637937145 YP_544366 ""</i>                     |                      |                   |                 |                |            |                                               |                      |                   |                 |                |                        |           |                |   |                   |  |
| <b>MFLA0255</b> |                                                                                                                                           | 3.053                | 3.315             | 4.190           | -0.443         | Y ●● Y     |                                               | 5.13 E-2             | 18.856            | 21.725          | 21.910         | -2.622                 | Y ●●      |                |   |                   |  |
|                 | <i>Phosphoribosyl-AMP cyclohydrolase [Methylobacillus flagellatus KT]637937146 YP_544367</i>                                              |                      |                   |                 |                |            |                                               |                      |                   |                 |                |                        |           |                |   |                   |  |
| <b>MFLA0256</b> |                                                                                                                                           | 2.543                | 2.907             | 3.736           | -1.579         | Y ●● Y     |                                               | 1.78 E-2             | 21.250            | 21.974          | 22.657         | -1.727                 | Y ●●      |                |   |                   |  |
|                 | <i>phosphoribosyl-ATP pyrophosphohydrolase [Methylobacillus flagellatus KT]637937147 YP_544368</i>                                        |                      |                   |                 |                |            |                                               |                      |                   |                 |                |                        |           |                |   |                   |  |
| <b>MFLA0257</b> |                                                                                                                                           | 1.64 E-8             | 5.687             | 3.471           | 5.969          | R ●● Y     |                                               | 1.79 E-1             | 22.882            | 23.191          | 24.045         | -0.596                 | Y ●●      |                |   |                   |  |
|                 | <i>histidine triad (HIT) protein [Methylobacillus flagellatus KT]637937148 YP_544369</i>                                                  |                      |                   |                 |                |            |                                               |                      |                   |                 |                |                        |           |                |   |                   |  |
| <b>MFLA0258</b> |                                                                                                                                           | 3.328                | 3.730             | 4.543           | 1.362          | Y ●● Y     |                                               | 1.61 E-2             | 24.849            | 20.626          | 24.924         | 5.836                  | Y ●●      |                |   |                   |  |
|                 | <i>" twin-arginine translocation protein, TatA/E family [Methylobacillus flagellatus KT]637937149 YP_544370 ""</i>                        |                      |                   |                 |                |            |                                               |                      |                   |                 |                |                        |           |                |   |                   |  |
| <b>MFLA0259</b> |                                                                                                                                           |                      | 1.322             | 1.322           |                | Y ●● Y     |                                               |                      |                   | 22.383          | 22.383         |                        | Y ●●      |                |   |                   |  |
|                 | <i>twin-arginine translocation protein TatB [Methylobacillus flagellatus KT]637937150 YP_544371</i>                                       |                      |                   |                 |                |            |                                               |                      |                   |                 |                |                        |           |                |   |                   |  |
| <b>MFLA0260</b> |                                                                                                                                           | 0.000                | 0.000             |                 |                |            |                                               | 0.000                | 0.000             |                 |                |                        |           |                |   |                   |  |
|                 | <i>Sec-independent protein translocase TatC [Methylobacillus flagellatus KT]637937151 YP_544372</i>                                       |                      |                   |                 |                |            |                                               |                      |                   |                 |                |                        |           |                |   |                   |  |
| <b>MFLA0261</b> |                                                                                                                                           | 4.5 E-3              | 6.079             | 6.613           | 7.371          | G ●● Y     |                                               | 7.24 E-2             | 25.955            | 26.438          | 27.216         | -0.449                 | G ●●      |                |   |                   |  |
|                 | <i>" peptidase S1 and S6, chymotrypsin/Hap [Methylobacillus flagellatus KT]637937152 YP_544373 ""</i>                                     |                      |                   |                 |                |            |                                               |                      |                   |                 |                |                        |           |                |   |                   |  |
| <b>MFLA0262</b> |                                                                                                                                           | 4.903                | 3.032             | 5.251           | 1.842          | Y ●● Y     |                                               | 2.23 E-1             | 21.933            | 21.637          | 22.792         | -0.347                 | Y ●●      |                |   |                   |  |
|                 | <i>protein of unknown function DUF34 [Methylobacillus flagellatus KT]637937153 YP_544374</i>                                              |                      |                   |                 |                |            |                                               |                      |                   |                 |                |                        |           |                |   |                   |  |
| <b>MFLA0263</b> |                                                                                                                                           | 0                    | 8.435             | 9.384           | 9.986          | G ●● Y     |                                               | 8.26 E-2             | 27.822            | 28.375          | 29.125         | -0.648                 | G ●●      |                |   |                   |  |
|                 | <i>glutathione S-transferase-like protein [Methylobacillus flagellatus KT]637937154 YP_544375</i>                                         |                      |                   |                 |                |            |                                               |                      |                   |                 |                |                        |           |                |   |                   |  |
| <b>MFLA0264</b> |                                                                                                                                           | 0.521                | 4.540             | 4.626           | -2.956         | Y ●● Y     |                                               | 6.47 E-2             | 21.089            | 25.304          | 25.379         | -3.184                 | Y ●●      |                |   |                   |  |
|                 | <i>Stringent starvation protein B [Methylobacillus flagellatus KT]637937155 YP_544376</i>                                                 |                      |                   |                 |                |            |                                               |                      |                   |                 |                |                        |           |                |   |                   |  |

| ORF             | AM/OH <i>M. Flagellatus</i> Spectral Count                                                                      |                              |                           |                         |                        |            | AM/OH <i>M. Flagellatus</i> Protein Intensity |                              |                           |                         |                        |           | Spectral Count         |  | Protein Intensity |  |
|-----------------|-----------------------------------------------------------------------------------------------------------------|------------------------------|---------------------------|-------------------------|------------------------|------------|-----------------------------------------------|------------------------------|---------------------------|-------------------------|------------------------|-----------|------------------------|--|-------------------|--|
|                 | q-value                                                                                                         | log <sub>2</sub> Methylamine | log <sub>2</sub> Methanol | log <sub>2</sub> Sc Sum | log <sub>2</sub> Ratio | Regulation | q-value                                       | log <sub>2</sub> Methylamine | log <sub>2</sub> Methanol | log <sub>2</sub> PI Sum | log <sub>2</sub> Ratio | Consensus | Log <sub>2</sub> Ratio |  |                   |  |
| <b>MFLA0265</b> | 0                                                                                                               | 12.327                       | 13.069                    | 13.746                  | -0.769                 | G ●●● Y    | 4.29 E-3                                      | 33.109                       | 33.547                    | 34.345                  | -0.438                 | G ●●      |                        |  |                   |  |
|                 | <i>translation elongation factor Tu [Methylobacillus flagellatus KT]637937160 YP_544377</i>                     |                              |                           |                         |                        |            |                                               |                              |                           |                         |                        |           |                        |  |                   |  |
| <b>MFLA0266</b> | 0.000                                                                                                           | 0.000                        |                           |                         |                        | ●●         |                                               | 0.000                        | 0.000                     |                         |                        | ●         |                        |  |                   |  |
|                 | <i>SecE subunit of protein translocation complex [Methylobacillus flagellatus KT]637937162 YP_544378</i>        |                              |                           |                         |                        |            |                                               |                              |                           |                         |                        |           |                        |  |                   |  |
| <b>MFLA0267</b> | 7.122                                                                                                           | 6.869                        | 8.001                     | 0.181                   | Y ●●● Y                |            | 5.9 E-2                                       | 27.294                       | 26.767                    | 28.054                  | 0.497                  | Y ●●      |                        |  |                   |  |
|                 | <i>NusG antitermination factor [Methylobacillus flagellatus KT]637937163 YP_544379</i>                          |                              |                           |                         |                        |            |                                               |                              |                           |                         |                        |           |                        |  |                   |  |
| <b>MFLA0268</b> | 1.03 E-1                                                                                                        | 6.058                        | 6.207                     | 7.134                   | -0.168                 | Y ●●● G    | 8.35 E-3                                      | 27.562                       | 28.365                    | 29.018                  | -0.801                 | G ●●      |                        |  |                   |  |
|                 | <i>ribosomal protein L11 [Methylobacillus flagellatus KT]637937164 YP_544380</i>                                |                              |                           |                         |                        |            |                                               |                              |                           |                         |                        |           |                        |  |                   |  |
| <b>MFLA0269</b> | 10.362                                                                                                          | 10.737                       | 11.562                    | -0.367                  | Y ●●● Y                |            | 7.9 E-2                                       | 30.038                       | 30.623                    | 31.360                  | -0.608                 | Y ●●      |                        |  |                   |  |
|                 | <i>ribosomal protein L1 [Methylobacillus flagellatus KT]637937165 YP_544381</i>                                 |                              |                           |                         |                        |            |                                               |                              |                           |                         |                        |           |                        |  |                   |  |
| <b>MFLA0270</b> | 8.125                                                                                                           | 8.035                        | 9.081                     | 0.065                   | Y ●●● Y                |            | 2.53 E-1                                      | 28.686                       | 28.718                    | 29.702                  | -0.063                 | Y ●●      |                        |  |                   |  |
|                 | <i>ribosomal protein L10 [Methylobacillus flagellatus KT]637937166 YP_544382</i>                                |                              |                           |                         |                        |            |                                               |                              |                           |                         |                        |           |                        |  |                   |  |
| <b>MFLA0271</b> | 10.175                                                                                                          | 10.248                       | 11.212                    | -0.086                  | Y ●●● Y                |            | 7.24 E-2                                      | 29.578                       | 29.895                    | 30.745                  | -0.341                 | Y ●●      |                        |  |                   |  |
|                 | <i>ribosomal protein L7/L12 [Methylobacillus flagellatus KT]637937167 YP_544383</i>                             |                              |                           |                         |                        |            |                                               |                              |                           |                         |                        |           |                        |  |                   |  |
| <b>MFLA0272</b> | 10.761                                                                                                          | 10.793                       | 11.777                    | -0.050                  | Y ●●● Y                |            | 3.48 E-2                                      | 30.310                       | 30.926                    | 31.650                  | -0.663                 | Y ●●      |                        |  |                   |  |
|                 | <i>" DNA-directed RNA polymerase, beta subunit [Methylobacillus flagellatus KT]637937168 YP_544384 ""</i>       |                              |                           |                         |                        |            |                                               |                              |                           |                         |                        |           |                        |  |                   |  |
| <b>MFLA0273</b> | 10.631                                                                                                          | 10.712                       | 11.672                    | -0.093                  | Y ●●● Y                |            | 2.7 E-2                                       | 29.891                       | 30.466                    | 31.207                  | -0.602                 | Y ●●      |                        |  |                   |  |
|                 | <i>" DNA-directed RNA polymerase, subunit beta-prime [Methylobacillus flagellatus KT]637937169 YP_544385 ""</i> |                              |                           |                         |                        |            |                                               |                              |                           |                         |                        |           |                        |  |                   |  |
| <b>MFLA0274</b> | 6.383                                                                                                           | 7.198                        | 7.848                     | 0.416                   | Y ●●● Y                |            | 6.08 E-2                                      | 21.827                       | 25.277                    | 25.404                  | -2.429                 | Y ●●      |                        |  |                   |  |
|                 | <i>ribosomal protein S12 [Methylobacillus flagellatus KT]637937170 YP_544386</i>                                |                              |                           |                         |                        |            |                                               |                              |                           |                         |                        |           |                        |  |                   |  |
| <b>MFLA0275</b> | 1.4 E-2                                                                                                         | 7.083                        | 6.839                     | 7.966                   | 0.265                  | Y ●●● Y    | 1.05 E-1                                      | 28.386                       | 28.533                    | 29.461                  | -0.143                 | Y ●●      |                        |  |                   |  |
|                 | <i>ribosomal protein S7 [Methylobacillus flagellatus KT]637937171 YP_544387</i>                                 |                              |                           |                         |                        |            |                                               |                              |                           |                         |                        |           |                        |  |                   |  |
| <b>MFLA0276</b> | 10.227                                                                                                          | 10.623                       | 11.438                    | -0.400                  | Y ●●● Y                |            | 3.92 E-2                                      | 30.608                       | 31.077                    | 31.861                  | -0.480                 | Y ●●      |                        |  |                   |  |
|                 | <i>translation elongation factor G [Methylobacillus flagellatus KT]637937172 YP_544388</i>                      |                              |                           |                         |                        |            |                                               |                              |                           |                         |                        |           |                        |  |                   |  |
| <b>MFLA0277</b> | 0.000                                                                                                           | 0.000                        |                           |                         |                        | ●●         |                                               | 0.000                        | 0.000                     |                         |                        | ●         |                        |  |                   |  |
|                 | <i>translation elongation factor Tu [Methylobacillus flagellatus KT]637937173 YP_544389</i>                     |                              |                           |                         |                        |            |                                               |                              |                           |                         |                        |           |                        |  |                   |  |
| <b>MFLA0278</b> | 2.63 E-2                                                                                                        | 6.925                        | 7.075                     | 8.002                   | -0.180                 | Y ●●● Y    | 1.21 E-1                                      | 27.997                       | 28.180                    | 29.091                  | -0.175                 | Y ●●      |                        |  |                   |  |
|                 | <i>ribosomal protein S10 [Methylobacillus flagellatus KT]637937174 YP_544390</i>                                |                              |                           |                         |                        |            |                                               |                              |                           |                         |                        |           |                        |  |                   |  |
| <b>MFLA0279</b> | 2.75 E-8                                                                                                        | 6.662                        | 7.385                     | 8.068                   | -0.697                 | G ●●● Y    | 2.17 E-1                                      | 28.232                       | 28.337                    | 29.285                  | -0.100                 | Y ●●      |                        |  |                   |  |
|                 | <i>ribosomal protein L3 [Methylobacillus flagellatus KT]637937175 YP_544391</i>                                 |                              |                           |                         |                        |            |                                               |                              |                           |                         |                        |           |                        |  |                   |  |
| <b>MFLA0280</b> | 6.51 E-2                                                                                                        | 8.955                        | 9.083                     | 10.020                  | -0.128                 | Y ●●● Y    | 2.1 E-1                                       | 29.661                       | 29.614                    | 30.638                  | 0.038                  | Y ●●      |                        |  |                   |  |
|                 | <i>ribosomal protein L4/L1e [Methylobacillus flagellatus KT]637937176 YP_544392</i>                             |                              |                           |                         |                        |            |                                               |                              |                           |                         |                        |           |                        |  |                   |  |
| <b>MFLA0281</b> | 6.304                                                                                                           | 6.468                        | 7.389                     | -0.354                  | Y ●●● Y                |            | 2.58 E-1                                      | 27.679                       | 27.638                    | 28.659                  | -0.026                 | Y ●●      |                        |  |                   |  |
|                 | <i>Ribosomal protein L25/L23 [Methylobacillus flagellatus KT]637937177 YP_544393</i>                            |                              |                           |                         |                        |            |                                               |                              |                           |                         |                        |           |                        |  |                   |  |
| <b>MFLA0282</b> | 8.192                                                                                                           | 8.405                        | 9.302                     | -0.196                  | Y ●●● Y                |            | 2.64 E-1                                      | 29.181                       | 29.190                    | 30.186                  | -0.016                 | Y ●●      |                        |  |                   |  |
|                 | <i>ribosomal protein L2 [Methylobacillus flagellatus KT]637937178 YP_544394</i>                                 |                              |                           |                         |                        |            |                                               |                              |                           |                         |                        |           |                        |  |                   |  |
| <b>MFLA0283</b> | 0                                                                                                               | 7.054                        | 5.504                     | 7.478                   | 1.548                  | R ●●● Y    | 5.97 E-2                                      | 26.721                       | 27.076                    | 27.910                  | -0.381                 | Y ●●      |                        |  |                   |  |
|                 | <i>ribosomal protein S19 [Methylobacillus flagellatus KT]637937179 YP_544395</i>                                |                              |                           |                         |                        |            |                                               |                              |                           |                         |                        |           |                        |  |                   |  |
| <b>MFLA0284</b> | 1.13 E-1                                                                                                        | 7.866                        | 7.811                     | 8.839                   | 0.050                  | Y ●●● Y    | 1.31 E-1                                      | 28.701                       | 28.812                    | 29.758                  | -0.102                 | Y ●●      |                        |  |                   |  |
|                 | <i>ribosomal protein L22 [Methylobacillus flagellatus KT]637937180 YP_544396</i>                                |                              |                           |                         |                        |            |                                               |                              |                           |                         |                        |           |                        |  |                   |  |
| <b>MFLA0285</b> | 0                                                                                                               | 7.430                        | 8.200                     | 8.865                   | -0.925                 | G ●●● Y    | 2.34 E-1                                      | 28.119                       | 28.272                    | 29.197                  | -0.466                 | G ●●      |                        |  |                   |  |
|                 | <i>ribosomal protein S3 [Methylobacillus flagellatus KT]637937181 YP_544397</i>                                 |                              |                           |                         |                        |            |                                               |                              |                           |                         |                        |           |                        |  |                   |  |
| <b>MFLA0286</b> | 1.21 E-1                                                                                                        | 6.362                        | 6.195                     | 7.281                   | 0.164                  | Y ●●● Y    | 1.03 E-1                                      | 28.889                       | 28.255                    | 29.607                  | 0.583                  | Y ●●      |                        |  |                   |  |
|                 | <i>ribosomal protein L16 [Methylobacillus flagellatus KT]637937182 YP_544398</i>                                |                              |                           |                         |                        |            |                                               |                              |                           |                         |                        |           |                        |  |                   |  |

| ORF             | AM/OH <i>M. Flagellatus</i> Spectral Count                                                                 |                              |                           |                         |                        |            | AM/OH <i>M. Flagellatus</i> Protein Intensity |                              |                           |                         |                        |                        | Consensus | Spectral Count |   | Protein Intensity |  |
|-----------------|------------------------------------------------------------------------------------------------------------|------------------------------|---------------------------|-------------------------|------------------------|------------|-----------------------------------------------|------------------------------|---------------------------|-------------------------|------------------------|------------------------|-----------|----------------|---|-------------------|--|
|                 | q-value                                                                                                    | log <sub>2</sub> Methylamine | log <sub>2</sub> Methanol | log <sub>2</sub> Sc Sum | log <sub>2</sub> Ratio | Regulation | q-value                                       | log <sub>2</sub> Methylamine | log <sub>2</sub> Methanol | log <sub>2</sub> PI Sum | log <sub>2</sub> Ratio | Log <sub>2</sub> Ratio |           | -7             | 0 | 7                 |  |
| <b>MFLA0287</b> | 1.38 E-3                                                                                                   | 6.376                        | 5.772                     | 7.105                   | 0.591                  | R ●●● Y    | 1.36 E-1                                      | 26.805                       | 27.000                    | 27.906                  | -0.226                 | Y ●●                   |           |                |   |                   |  |
|                 | <i>ribosomal protein L29 [Methylobacillus flagellatus KT]637937183 YP_544399</i>                           |                              |                           |                         |                        |            |                                               |                              |                           |                         |                        |                        |           |                |   |                   |  |
| <b>MFLA0288</b> |                                                                                                            | 5.966                        | 5.729                     | 6.853                   | -0.368                 | Y ●●● Y    | 2.02 E-1                                      | 25.534                       | 25.712                    | 26.626                  | -0.294                 | Y ●●                   |           |                |   |                   |  |
|                 | <i>ribosomal protein S17 [Methylobacillus flagellatus KT]637937184 YP_544400</i>                           |                              |                           |                         |                        |            |                                               |                              |                           |                         |                        |                        |           |                |   |                   |  |
| <b>MFLA0289</b> | 3.82 E-3                                                                                                   | 7.180                        | 6.759                     | 7.985                   | 0.430                  | Y ●●● Y    | 1.07 E-1                                      | 28.046                       | 28.289                    | 29.173                  | -0.222                 | Y ●●                   |           |                |   |                   |  |
|                 | <i>ribosomal protein L14 [Methylobacillus flagellatus KT]637937185 YP_544401</i>                           |                              |                           |                         |                        |            |                                               |                              |                           |                         |                        |                        |           |                |   |                   |  |
| <b>MFLA0290</b> | 1.61 E-10                                                                                                  | 7.781                        | 7.019                     | 8.450                   | 0.754                  | R ●●● Y    | 7.14 E-2                                      | 27.942                       | 27.520                    | 28.746                  | 0.415                  | R ●●                   |           |                |   |                   |  |
|                 | <i>ribosomal protein L24 [Methylobacillus flagellatus KT]637937186 YP_544402</i>                           |                              |                           |                         |                        |            |                                               |                              |                           |                         |                        |                        |           |                |   |                   |  |
| <b>MFLA0291</b> | 0                                                                                                          | 8.036                        | 8.802                     | 9.469                   | -0.754                 | G ●●● G    | 2.75 E-5                                      | 28.600                       | 29.618                    | 30.197                  | -1.018                 | G ●●                   |           |                |   |                   |  |
|                 | <i>ribosomal protein L5 [Methylobacillus flagellatus KT]637937187 YP_544403</i>                            |                              |                           |                         |                        |            |                                               |                              |                           |                         |                        |                        |           |                |   |                   |  |
| <b>MFLA0292</b> | 1.71 E-2                                                                                                   | 7.081                        | 6.968                     | 8.025                   | 0.098                  | Y ●●● Y    | 1.79 E-1                                      | 27.136                       | 27.202                    | 28.170                  | -0.075                 | Y ●●                   |           |                |   |                   |  |
|                 | <i>ribosomal protein S14 [Methylobacillus flagellatus KT]637937188 YP_544404</i>                           |                              |                           |                         |                        |            |                                               |                              |                           |                         |                        |                        |           |                |   |                   |  |
| <b>MFLA0293</b> | 1.44 E-14                                                                                                  | 9.299                        | 8.916                     | 10.120                  | 0.422                  | Y ●●● G    | 6.19 E-3                                      | 26.883                       | 28.025                    | 28.564                  | -1.143                 | Y ●●                   |           |                |   |                   |  |
|                 | <i>ribosomal protein S8 [Methylobacillus flagellatus KT]637937189 YP_544405</i>                            |                              |                           |                         |                        |            |                                               |                              |                           |                         |                        |                        |           |                |   |                   |  |
| <b>MFLA0294</b> |                                                                                                            | 9.008                        | 8.911                     | 9.960                   | 0.087                  | Y ●●● Y    | 8.3 E-2                                       | 29.205                       | 29.544                    | 30.385                  | -0.350                 | Y ●●                   |           |                |   |                   |  |
|                 | <i>ribosomal protein L6 [Methylobacillus flagellatus KT]637937190 YP_544406</i>                            |                              |                           |                         |                        |            |                                               |                              |                           |                         |                        |                        |           |                |   |                   |  |
| <b>MFLA0295</b> | 0                                                                                                          | 6.284                        | 8.288                     | 8.609                   | -1.932                 | G ●●● G    | 9.51 E-3                                      | 26.329                       | 27.547                    | 28.063                  | -1.221                 | G ●●                   |           |                |   |                   |  |
|                 | <i>ribosomal protein L18 [Methylobacillus flagellatus KT]637937191 YP_544407</i>                           |                              |                           |                         |                        |            |                                               |                              |                           |                         |                        |                        |           |                |   |                   |  |
| <b>MFLA0296</b> |                                                                                                            | 8.242                        | 8.658                     | 9.465                   | -0.366                 | Y ●●● Y    | 1.99 E-2                                      | 28.089                       | 28.421                    | 29.264                  | -0.336                 | Y ●●                   |           |                |   |                   |  |
|                 | <i>ribosomal protein S5-like protein [Methylobacillus flagellatus KT]637937192 YP_544408</i>               |                              |                           |                         |                        |            |                                               |                              |                           |                         |                        |                        |           |                |   |                   |  |
| <b>MFLA0297</b> |                                                                                                            | 7.318                        | 7.149                     | 8.236                   | 0.150                  | Y ●●● Y    | 7.24 E-2                                      | 27.283                       | 27.023                    | 28.159                  | 0.260                  | Y ●●                   |           |                |   |                   |  |
|                 | <i>ribosomal protein L30 [Methylobacillus flagellatus KT]637937193 YP_544409</i>                           |                              |                           |                         |                        |            |                                               |                              |                           |                         |                        |                        |           |                |   |                   |  |
| <b>MFLA0298</b> | 7.93 E-2                                                                                                   | 6.807                        | 6.876                     | 7.842                   | -0.082                 | Y ●●● G    | 9.69 E-3                                      | 27.722                       | 28.635                    | 29.250                  | -0.927                 | Y ●●                   |           |                |   |                   |  |
|                 | <i>ribosomal protein L15 [Methylobacillus flagellatus KT]637937194 YP_544410</i>                           |                              |                           |                         |                        |            |                                               |                              |                           |                         |                        |                        |           |                |   |                   |  |
| <b>MFLA0299</b> |                                                                                                            | 1.843                        | 3.086                     | 3.594                   | 0.147                  | Y ●●● Y    | 1.2 E-1                                       | 22.350                       | 24.055                    | 24.441                  | -0.651                 | Y ●●                   |           |                |   |                   |  |
|                 | <i>SecY protein [Methylobacillus flagellatus KT]637937195 YP_544411</i>                                    |                              |                           |                         |                        |            |                                               |                              |                           |                         |                        |                        |           |                |   |                   |  |
| <b>MFLA0300</b> | 5.1 E-2                                                                                                    | 5.631                        | 5.166                     | 6.417                   | 0.473                  | Y ●●● Y    | 1.12 E-1                                      | 25.058                       | 25.245                    | 26.155                  | -0.182                 | Y ●●                   |           |                |   |                   |  |
|                 | <i>translation initiation factor IF-1 [Methylobacillus flagellatus KT]637937196 YP_544412</i>              |                              |                           |                         |                        |            |                                               |                              |                           |                         |                        |                        |           |                |   |                   |  |
| <b>MFLA0301</b> |                                                                                                            | 0.000                        | 0.000                     |                         |                        | ●●●        |                                               | 0.000                        | 0.000                     |                         |                        | ●●                     |           |                |   |                   |  |
|                 | <i>ribosomal protein L36 [Methylobacillus flagellatus KT]637937197 YP_544413</i>                           |                              |                           |                         |                        |            |                                               |                              |                           |                         |                        |                        |           |                |   |                   |  |
| <b>MFLA0302</b> | 1.23 E-1                                                                                                   | 8.175                        | 8.241                     | 9.208                   | -0.064                 | Y ●●● Y    | 1.01 E-2                                      | 27.274                       | 27.961                    | 28.658                  | -0.687                 | Y ●●                   |           |                |   |                   |  |
|                 | <i>ribosomal protein S13 [Methylobacillus flagellatus KT]637937198 YP_544414</i>                           |                              |                           |                         |                        |            |                                               |                              |                           |                         |                        |                        |           |                |   |                   |  |
| <b>MFLA0303</b> |                                                                                                            | 8.269                        | 8.057                     | 9.167                   | -0.001                 | Y ●●● Y    | 1.77 E-2                                      | 27.434                       | 28.815                    | 29.283                  | -1.354                 | Y ●●                   |           |                |   |                   |  |
|                 | <i>ribosomal protein S11 [Methylobacillus flagellatus KT]637937199 YP_544415</i>                           |                              |                           |                         |                        |            |                                               |                              |                           |                         |                        |                        |           |                |   |                   |  |
| <b>MFLA0304</b> | 0                                                                                                          | 9.611                        | 10.726                    | 11.274                  | -1.163                 | G ●●● Y    | 6.37 E-2                                      | 29.040                       | 29.693                    | 30.404                  | -0.703                 | G ●●                   |           |                |   |                   |  |
|                 | <i>" DNA-directed RNA polymerase, alpha subunit [Methylobacillus flagellatus KT]637937200 YP_544416 ""</i> |                              |                           |                         |                        |            |                                               |                              |                           |                         |                        |                        |           |                |   |                   |  |
| <b>MFLA0305</b> |                                                                                                            | 5.084                        | 4.388                     | 5.777                   | 0.701                  | Y ●●● Y    | 4.72 E-2                                      | 27.012                       | 27.704                    | 28.400                  | -0.657                 | Y ●●                   |           |                |   |                   |  |
|                 | <i>ribosomal protein L17 [Methylobacillus flagellatus KT]637937201 YP_544417</i>                           |                              |                           |                         |                        |            |                                               |                              |                           |                         |                        |                        |           |                |   |                   |  |
| <b>MFLA0306</b> |                                                                                                            | 4.017                        | 5.466                     | 5.916                   | -1.483                 | Y ●●● Y    | 2.99 E-2                                      | 22.462                       | 24.414                    | 24.745                  | -2.089                 | Y ●●                   |           |                |   |                   |  |
|                 | <i>magnesium transporter [Methylobacillus flagellatus KT]637937202 YP_544418</i>                           |                              |                           |                         |                        |            |                                               |                              |                           |                         |                        |                        |           |                |   |                   |  |
| <b>MFLA0307</b> |                                                                                                            | 1.521                        |                           | 1.521                   |                        | Y ●●● Y    |                                               | 20.216                       |                           | 20.216                  |                        | Y ●●                   |           |                |   |                   |  |
|                 | <i>MscS Mechanosensitive ion channel [Methylobacillus flagellatus KT]637937203 YP_544419</i>               |                              |                           |                         |                        |            |                                               |                              |                           |                         |                        |                        |           |                |   |                   |  |
| <b>MFLA0308</b> |                                                                                                            | 0.000                        | 0.000                     |                         |                        | ●●●        |                                               | 0.000                        | 0.000                     |                         |                        | ●●                     |           |                |   |                   |  |
|                 | <i>hypothetical protein [Methylobacillus flagellatus KT]637937204 YP_544420</i>                            |                              |                           |                         |                        |            |                                               |                              |                           |                         |                        |                        |           |                |   |                   |  |

| ORF             | AM/OH <i>M. Flagellatus</i> Spectral Count                                                                                                |                              |                           |                         |                        |            | AM/OH <i>M. Flagellatus</i> Protein Intensity |                              |                           |                         |                        |                        | Consensus | Spectral Count |  | Protein Intensity |  |
|-----------------|-------------------------------------------------------------------------------------------------------------------------------------------|------------------------------|---------------------------|-------------------------|------------------------|------------|-----------------------------------------------|------------------------------|---------------------------|-------------------------|------------------------|------------------------|-----------|----------------|--|-------------------|--|
|                 | q-value                                                                                                                                   | log <sub>2</sub> Methylamine | log <sub>2</sub> Methanol | log <sub>2</sub> Sc Sum | log <sub>2</sub> Ratio | Regulation | q-value                                       | log <sub>2</sub> Methylamine | log <sub>2</sub> Methanol | log <sub>2</sub> PI Sum | log <sub>2</sub> Ratio | Log <sub>2</sub> Ratio |           |                |  |                   |  |
| <b>MFLA0309</b> |                                                                                                                                           | 2.106                        |                           | 2.106                   |                        | Y ●● Y     |                                               | 19.947                       |                           | 19.947                  |                        | Y ●                    |           |                |  |                   |  |
|                 | <i>" transcriptional regulator, TetR family [Methylobacillus flagellatus KT]637937205 YP_544421 ""</i>                                    |                              |                           |                         |                        |            |                                               |                              |                           |                         |                        |                        |           |                |  |                   |  |
| <b>MFLA0310</b> | 5.13 E-3                                                                                                                                  | 5.806                        | 3.931                     | 6.153                   | 0.874                  | R ●● Y     | 7.16 E-2                                      | 24.905                       | 22.118                    | 25.100                  | 1.759                  | R ●                    |           |                |  |                   |  |
|                 | <i>conserved hypothetical signal peptide protein [Methylobacillus flagellatus KT]637937206 YP_544422</i>                                  |                              |                           |                         |                        |            |                                               |                              |                           |                         |                        |                        |           |                |  |                   |  |
| <b>MFLA0311</b> |                                                                                                                                           | 5.057                        | 3.923                     | 5.598                   | 1.169                  | Y ●● Y     | 3.67 E-2                                      | 25.773                       | 22.107                    | 25.882                  | 3.705                  | Y ●                    |           |                |  |                   |  |
|                 | <i>ribosomal protein L33 [Methylobacillus flagellatus KT]637937207 YP_544423</i>                                                          |                              |                           |                         |                        |            |                                               |                              |                           |                         |                        |                        |           |                |  |                   |  |
| <b>MFLA0312</b> |                                                                                                                                           | 6.789                        | 6.644                     | 7.718                   | 0.245                  | Y ●● Y     | 2.17 E-1                                      | 27.470                       | 27.640                    | 28.557                  | -0.289                 | Y ●                    |           |                |  |                   |  |
|                 | <i>ribosomal protein L28 [Methylobacillus flagellatus KT]637937208 YP_544424</i>                                                          |                              |                           |                         |                        |            |                                               |                              |                           |                         |                        |                        |           |                |  |                   |  |
| <b>MFLA0313</b> |                                                                                                                                           | 4.908                        | 4.015                     | 5.529                   | 0.712                  | Y ●● Y     | 2.64 E-1                                      | 23.541                       | 23.497                    | 24.519                  | 0.012                  | Y ●                    |           |                |  |                   |  |
|                 | <i>deoxyuridine 5'-triphosphate nucleotidohydrolase (dut) [Methylobacillus flagellatus KT]637937209 YP_544425</i>                         |                              |                           |                         |                        |            |                                               |                              |                           |                         |                        |                        |           |                |  |                   |  |
| <b>MFLA0314</b> | 8.64 E-2                                                                                                                                  | 5.474                        | 5.164                     | 6.327                   | 0.311                  | Y ●● Y     | 1.29 E-2                                      | 24.086                       | 23.629                    | 24.876                  | 0.463                  | Y ●                    |           |                |  |                   |  |
|                 | <i>phosphopantothenoylcysteine decarboxylase/phosphopantothenate--cysteine ligase [Methylobacillus flagellatus KT]637937210 YP_544426</i> |                              |                           |                         |                        |            |                                               |                              |                           |                         |                        |                        |           |                |  |                   |  |
| <b>MFLA0315</b> |                                                                                                                                           | 0.000                        | 0.000                     |                         |                        | ●●         |                                               | 0.000                        | 0.000                     |                         |                        | ●                      |           |                |  |                   |  |
|                 | <i>DNA repair protein RadC [Methylobacillus flagellatus KT]637937211 YP_544427</i>                                                        |                              |                           |                         |                        |            |                                               |                              |                           |                         |                        |                        |           |                |  |                   |  |
| <b>MFLA0316</b> |                                                                                                                                           | 2.621                        | 0.000                     | 2.838                   | 2.621                  | Y ●● Y     |                                               | 20.924                       | 20.534                    | 21.742                  | 0.390                  | Y ●                    |           |                |  |                   |  |
|                 | <i>hypothetical protein [Methylobacillus flagellatus KT]637937212 YP_544428</i>                                                           |                              |                           |                         |                        |            |                                               |                              |                           |                         |                        |                        |           |                |  |                   |  |
| <b>MFLA0317</b> |                                                                                                                                           | 0.000                        | 0.000                     |                         |                        | ●●         |                                               | 0.000                        | 0.000                     |                         |                        | ●                      |           |                |  |                   |  |
|                 | <i>molybdopterin oxidoreductase [Methylobacillus flagellatus KT]637937213 YP_544429</i>                                                   |                              |                           |                         |                        |            |                                               |                              |                           |                         |                        |                        |           |                |  |                   |  |
| <b>MFLA0318</b> |                                                                                                                                           | 0.000                        | 0.000                     |                         |                        | ●●         |                                               | 0.000                        | 0.000                     |                         |                        | ●                      |           |                |  |                   |  |
|                 | <i>" Nitrite reductase (NAD(P)H) large subunit, NirD [Methylobacillus flagellatus KT]637937214 YP_544430 ""</i>                           |                              |                           |                         |                        |            |                                               |                              |                           |                         |                        |                        |           |                |  |                   |  |
| <b>MFLA0319</b> |                                                                                                                                           | 0.000                        | 0.000                     |                         |                        | ●●         |                                               | 0.000                        | 0.000                     |                         |                        | ●                      |           |                |  |                   |  |
|                 | <i>" Nitrite reductase (NAD(P)H) large subunit, NirB [Methylobacillus flagellatus KT]637937215 YP_544431 ""</i>                           |                              |                           |                         |                        |            |                                               |                              |                           |                         |                        |                        |           |                |  |                   |  |
| <b>MFLA0320</b> |                                                                                                                                           | 0.000                        | 0.000                     |                         |                        | ●●         |                                               | 0.000                        | 0.000                     |                         |                        | ●                      |           |                |  |                   |  |
|                 | <i>protein serine/threonine phosphatases [Methylobacillus flagellatus KT]637937216 YP_544432</i>                                          |                              |                           |                         |                        |            |                                               |                              |                           |                         |                        |                        |           |                |  |                   |  |
| <b>MFLA0321</b> |                                                                                                                                           | 0.000                        | 0.000                     |                         |                        | ●●         |                                               | 0.000                        | 0.000                     |                         |                        | ●                      |           |                |  |                   |  |
|                 | <i>Nitrate transporter [Methylobacillus flagellatus KT]637937217 YP_544433</i>                                                            |                              |                           |                         |                        |            |                                               |                              |                           |                         |                        |                        |           |                |  |                   |  |
| <b>MFLA0322</b> |                                                                                                                                           | 0.000                        | 0.000                     |                         |                        | ●●         |                                               | 0.000                        | 0.000                     |                         |                        | ●                      |           |                |  |                   |  |
|                 | <i>uroporphyrin-III C-methyltransferase [Methylobacillus flagellatus KT]637937218 YP_544434</i>                                           |                              |                           |                         |                        |            |                                               |                              |                           |                         |                        |                        |           |                |  |                   |  |
| <b>MFLA0323</b> |                                                                                                                                           |                              | 1.000                     | 1.000                   |                        | Y ●● Y     |                                               |                              | 19.519                    | 19.519                  |                        | Y ●                    |           |                |  |                   |  |
|                 | <i>putative methyl-accepting chemotaxis sensory transducer [Methylobacillus flagellatus KT]637937219 YP_544435</i>                        |                              |                           |                         |                        |            |                                               |                              |                           |                         |                        |                        |           |                |  |                   |  |
| <b>MFLA0324</b> |                                                                                                                                           | 0.000                        | 0.000                     |                         |                        | ●●         |                                               | 0.000                        | 0.000                     |                         |                        | ●                      |           |                |  |                   |  |
|                 | <i>hypothetical protein [Methylobacillus flagellatus KT]637937220 YP_544436</i>                                                           |                              |                           |                         |                        |            |                                               |                              |                           |                         |                        |                        |           |                |  |                   |  |
| <b>MFLA0325</b> |                                                                                                                                           | 0.000                        | 0.000                     |                         |                        | ●●         |                                               | 0.000                        | 0.000                     |                         |                        | ●                      |           |                |  |                   |  |
|                 | <i>nitrate transport ATP-binding subunits C and D [Methylobacillus flagellatus KT]637937221 YP_544437</i>                                 |                              |                           |                         |                        |            |                                               |                              |                           |                         |                        |                        |           |                |  |                   |  |
| <b>MFLA0326</b> |                                                                                                                                           | 0.000                        | 0.000                     |                         |                        | ●●         |                                               | 0.000                        | 0.000                     |                         |                        | ●                      |           |                |  |                   |  |
|                 | <i>nitrate transport permease [Methylobacillus flagellatus KT]637937222 YP_544438</i>                                                     |                              |                           |                         |                        |            |                                               |                              |                           |                         |                        |                        |           |                |  |                   |  |
| <b>MFLA0327</b> |                                                                                                                                           | 0.000                        | 0.000                     |                         |                        | ●●         |                                               | 0.000                        | 0.000                     |                         |                        | ●                      |           |                |  |                   |  |
|                 | <i>nitrate transporter periplasmic component [Methylobacillus flagellatus KT]637937223 YP_544439</i>                                      |                              |                           |                         |                        |            |                                               |                              |                           |                         |                        |                        |           |                |  |                   |  |
| <b>MFLA0328</b> |                                                                                                                                           | 0.000                        | 0.000                     |                         |                        | ●●         |                                               | 0.000                        | 0.000                     |                         |                        | ●                      |           |                |  |                   |  |
|                 | <i>hypothetical protein [Methylobacillus flagellatus KT]637937224 YP_544440</i>                                                           |                              |                           |                         |                        |            |                                               |                              |                           |                         |                        |                        |           |                |  |                   |  |
| <b>MFLA0329</b> |                                                                                                                                           | 0.000                        | 0.000                     |                         |                        | ●●         |                                               | 0.000                        | 0.000                     |                         |                        | ●                      |           |                |  |                   |  |
|                 | <i>response regulator receiver (CheY-like) and ANTAR domain protein [Methylobacillus flagellatus KT]637937225 YP_544441</i>               |                              |                           |                         |                        |            |                                               |                              |                           |                         |                        |                        |           |                |  |                   |  |
| <b>MFLA0330</b> |                                                                                                                                           | 0.000                        | 0.000                     |                         |                        | ●●         |                                               | 0.000                        | 0.000                     |                         |                        | ●                      |           |                |  |                   |  |
|                 | <i>protein serine/threonine phosphatases [Methylobacillus flagellatus KT]637937226 YP_544442</i>                                          |                              |                           |                         |                        |            |                                               |                              |                           |                         |                        |                        |           |                |  |                   |  |



| ORF             | AM/OH <i>M. Flagellatus</i> Spectral Count                                                                                              |                             |                           |                         |                        | AM/OH <i>M. Flagellatus</i> Protein Intensity |         |                             |                           |                         | Consensus | Spectral Count         |                        | Protein Intensity |   |   |
|-----------------|-----------------------------------------------------------------------------------------------------------------------------------------|-----------------------------|---------------------------|-------------------------|------------------------|-----------------------------------------------|---------|-----------------------------|---------------------------|-------------------------|-----------|------------------------|------------------------|-------------------|---|---|
|                 | q-value                                                                                                                                 | log <sub>2</sub> Methyamine | log <sub>2</sub> Methanol | log <sub>2</sub> Sc Sum | log <sub>2</sub> Ratio | Regulation                                    | q-value | log <sub>2</sub> Methyamine | log <sub>2</sub> Methanol | log <sub>2</sub> PI Sum |           | log <sub>2</sub> Ratio | Log <sub>2</sub> Ratio | -7                | 0 | 7 |
| <b>MFLA0331</b> | 0.000                                                                                                                                   | 0.000                       |                           |                         |                        |                                               | 0.000   | 0.000                       |                           |                         |           |                        |                        |                   |   |   |
|                 | <i>formate/nitrite transporter [Methylobacillus flagellatus KT]637937227 YP_544443</i>                                                  |                             |                           |                         |                        |                                               |         |                             |                           |                         |           |                        |                        |                   |   |   |
| <b>MFLA0332</b> | 2.521                                                                                                                                   | 2.700                       | 3.613                     | -0.180                  | Y                      | ●●                                            | Y       | 20.557                      | 18.998                    | 20.978                  | 1.559     | Y                      | ●                      |                   |   |   |
|                 | <i>" ABC transporter, ATP-binding/permease protein [Methylobacillus flagellatus KT]637937228 YP_544444 ""</i>                           |                             |                           |                         |                        |                                               |         |                             |                           |                         |           |                        |                        |                   |   |   |
| <b>MFLA0333</b> | 3.908                                                                                                                                   | 1.668                       | 4.185                     | 1.010                   | Y                      | ●●                                            | Y       | 1.85 E-1                    | 23.217                    | 21.061                  | 23.509    | -0.097                 | Y                      | ●                 |   |   |
|                 | <i>hypothetical protein [Methylobacillus flagellatus KT]637937229 YP_544445</i>                                                         |                             |                           |                         |                        |                                               |         |                             |                           |                         |           |                        |                        |                   |   |   |
| <b>MFLA0334</b> | 3.120                                                                                                                                   | 2.844                       | 3.989                     | 0.286                   | Y                      | ●●                                            | ●       | G                           | 9.51 E-3                  | 19.716                  | 21.688    | 22.016                 | -1.960                 | Y                 | ● |   |
|                 | <i>carbon starvation protein CstA [Methylobacillus flagellatus KT]637937230 YP_544446</i>                                               |                             |                           |                         |                        |                                               |         |                             |                           |                         |           |                        |                        |                   |   |   |
| <b>MFLA0335</b> | 0.000                                                                                                                                   | 0.000                       |                           |                         |                        |                                               | 0.000   | 0.000                       |                           |                         |           |                        |                        |                   |   |   |
|                 | <i>hypothetical protein [Methylobacillus flagellatus KT]637937231 YP_544447</i>                                                         |                             |                           |                         |                        |                                               |         |                             |                           |                         |           |                        |                        |                   |   |   |
| <b>MFLA0336</b> | 1.967                                                                                                                                   | 3.140                       | 3.669                     | -1.167                  | Y                      | ●●                                            | Y       | 1.56 E-1                    | 22.974                    | 22.077                  | 23.594    | -0.105                 | Y                      | ●                 |   |   |
|                 | <i>" transcriptional regulator, GntR family [Methylobacillus flagellatus KT]637937232 YP_544448 ""</i>                                  |                             |                           |                         |                        |                                               |         |                             |                           |                         |           |                        |                        |                   |   |   |
| <b>MFLA0337</b> | 0.000                                                                                                                                   | 0.000                       |                           |                         |                        |                                               | 0.000   | 0.000                       |                           |                         |           |                        |                        |                   |   |   |
|                 | <i>hypothetical protein [Methylobacillus flagellatus KT]637937233 YP_544449</i>                                                         |                             |                           |                         |                        |                                               |         |                             |                           |                         |           |                        |                        |                   |   |   |
| <b>MFLA0338</b> | 5.320                                                                                                                                   | 4.719                       | 6.051                     | 0.673                   | Y                      | ●●                                            | Y       | 2.28 E-1                    | 23.886                    | 23.659                  | 24.777    | 0.061                  | Y                      | ●                 |   |   |
|                 | <i>Oxidoreductase alpha (molybdopterin) subunit [Methylobacillus flagellatus KT]637937234 YP_544450</i>                                 |                             |                           |                         |                        |                                               |         |                             |                           |                         |           |                        |                        |                   |   |   |
| <b>MFLA0339</b> | 2.106                                                                                                                                   | 0.585                       | 2.537                     | 1.521                   | Y                      | ●●                                            | Y       | 21.530                      | 24.177                    | 24.391                  | -2.647    | Y                      | ●                      |                   |   |   |
|                 | <i>prolipoprotein diacylglycerol transferase [Methylobacillus flagellatus KT]637937235 YP_544451</i>                                    |                             |                           |                         |                        |                                               |         |                             |                           |                         |           |                        |                        |                   |   |   |
| <b>MFLA0340</b> | 7.673                                                                                                                                   | 7.733                       | 8.703                     | -0.105                  | Y                      | ●●                                            | Y       | 2.7 E-2                     | 26.872                    | 27.627                  | 28.298    | -0.780                 | Y                      | ●                 |   |   |
|                 | <i>dihydroxy-acid dehydratase [Methylobacillus flagellatus KT]637937236 YP_544452</i>                                                   |                             |                           |                         |                        |                                               |         |                             |                           |                         |           |                        |                        |                   |   |   |
| <b>MFLA0341</b> | 4.16 E-2                                                                                                                                | 6.267                       | 6.341                     | 7.305                   | -0.121                 | Y                                             | ●●      | Y                           | 1.55 E-1                  | 25.803                  | 25.554    | 26.684                 | 0.182                  | Y                 | ● |   |
|                 | <i>Aldose 1-epimerase [Methylobacillus flagellatus KT]637937237 YP_544453</i>                                                           |                             |                           |                         |                        |                                               |         |                             |                           |                         |           |                        |                        |                   |   |   |
| <b>MFLA0342</b> |                                                                                                                                         | 0.346                       | 0.346                     |                         |                        | Y                                             | ●●      | Y                           |                           | 22.587                  | 22.587    |                        | Y                      | ●                 |   |   |
|                 | <i>" cytochrome c, class I [Methylobacillus flagellatus KT]637937238 YP_544454 ""</i>                                                   |                             |                           |                         |                        |                                               |         |                             |                           |                         |           |                        |                        |                   |   |   |
| <b>MFLA0343</b> | 0.521                                                                                                                                   |                             | 0.521                     |                         |                        | Y                                             | ●●      | Y                           | 17.821                    |                         | 17.821    |                        | Y                      | ●                 |   |   |
|                 | <i>" sigma54 specific transcriptional regulator with GAF sensor, Fis family [Methylobacillus flagellatus KT]637937239 YP_544455 ""</i>  |                             |                           |                         |                        |                                               |         |                             |                           |                         |           |                        |                        |                   |   |   |
| <b>MFLA0344</b> | 3.621                                                                                                                                   | 0.346                       | 3.763                     | 3.274                   | Y                      | ●●                                            | Y       | 21.422                      | 16.510                    | 21.469                  | 4.913     | Y                      | ●                      |                   |   |   |
|                 | <i>Pyrrolo-quinoline quinone [Methylobacillus flagellatus KT]637937240 YP_544456</i>                                                    |                             |                           |                         |                        |                                               |         |                             |                           |                         |           |                        |                        |                   |   |   |
| <b>MFLA0345</b> | 0.521                                                                                                                                   |                             | 0.521                     |                         |                        | Y                                             | ●●      | Y                           | 15.366                    |                         | 15.366    |                        | Y                      | ●                 |   |   |
|                 | <i>amino acid permease-associated region [Methylobacillus flagellatus KT]637937241 YP_544457</i>                                        |                             |                           |                         |                        |                                               |         |                             |                           |                         |           |                        |                        |                   |   |   |
| <b>MFLA0346</b> | 1.04 E-1                                                                                                                                | 6.144                       | 6.057                     | 7.101                   | 0.069                  | Y                                             | ●●      | Y                           | 1.51 E-1                  | 26.380                  | 26.259    | 27.321                 | 0.105                  | Y                 | ● |   |
|                 | <i>Coproporphyrinogen oxidase [Methylobacillus flagellatus KT]637937242 YP_544458</i>                                                   |                             |                           |                         |                        |                                               |         |                             |                           |                         |           |                        |                        |                   |   |   |
| <b>MFLA0347</b> | 3.512                                                                                                                                   | 2.505                       | 4.094                     | 0.902                   | Y                      | ●●                                            | Y       | 1.62 E-1                    | 20.770                    | 21.023                  | 21.902    | -0.344                 | Y                      | ●                 |   |   |
|                 | <i>SUA5/yciO/yrdC-like protein [Methylobacillus flagellatus KT]637937243 YP_544459</i>                                                  |                             |                           |                         |                        |                                               |         |                             |                           |                         |           |                        |                        |                   |   |   |
| <b>MFLA0348</b> | 3.5 E-7                                                                                                                                 | 8.109                       | 7.633                     | 8.890                   | 0.452                  | Y                                             | ●●      | Y                           | 1.46 E-2                  | 26.942                  | 27.454    | 28.221                 | -0.515                 | Y                 | ● |   |
|                 | <i>phosphoribosylamine--glycine ligase [Methylobacillus flagellatus KT]637937244 YP_544460</i>                                          |                             |                           |                         |                        |                                               |         |                             |                           |                         |           |                        |                        |                   |   |   |
| <b>MFLA0349</b> | 1.28 E-2                                                                                                                                | 8.255                       | 8.156                     | 9.207                   | 0.085                  | Y                                             | ●●      | Y                           | 4.7 E-2                   | 27.667                  | 28.037    | 28.864                 | -0.392                 | Y                 | ● |   |
|                 | <i>phosphoribosylaminoimidazolecarboxamide formyltransferase/IMP cyclohydrolase [Methylobacillus flagellatus KT]637937245 YP_544461</i> |                             |                           |                         |                        |                                               |         |                             |                           |                         |           |                        |                        |                   |   |   |
| <b>MFLA0350</b> | 4.273                                                                                                                                   | 1.915                       | 4.530                     | 3.439                   | Y                      | ●●                                            | Y       | 1.43 E-2                    | 22.995                    | 20.911                  | 23.300    | 3.095                  | Y                      | ●                 |   |   |
|                 | <i>" helix-turn-helix, Fis-type [Methylobacillus flagellatus KT]637937246 YP_544462 ""</i>                                              |                             |                           |                         |                        |                                               |         |                             |                           |                         |           |                        |                        |                   |   |   |
| <b>MFLA0351</b> | 1.521                                                                                                                                   | 1.769                       | 2.650                     | 0.762                   | Y                      | ●●                                            | Y       | 1.19 E-1                    | 20.261                    | 22.483                  | 22.764    | -1.102                 | Y                      | ●                 |   |   |
|                 | <i>Dihydrouridine synthase TIM-barrel protein nifR3 [Methylobacillus flagellatus KT]637937247 YP_544463</i>                             |                             |                           |                         |                        |                                               |         |                             |                           |                         |           |                        |                        |                   |   |   |
| <b>MFLA0352</b> | 0.000                                                                                                                                   | 0.000                       |                           |                         |                        |                                               | 0.000   | 0.000                       |                           |                         |           |                        |                        |                   |   |   |
|                 | <i>methyl-accepting chemotaxis sensory transducer [Methylobacillus flagellatus KT]637937248 YP_544464</i>                               |                             |                           |                         |                        |                                               |         |                             |                           |                         |           |                        |                        |                   |   |   |

| ORF             | AM/OH <i>M. Flagellatus</i> Spectral Count                                                                          |                      |                   |                 |                 |            | AM/OH <i>M. Flagellatus</i> Protein Intensity |                      |                   |                 |                 |                        | Consensus | Spectral Count |   | Protein Intensity |  |
|-----------------|---------------------------------------------------------------------------------------------------------------------|----------------------|-------------------|-----------------|-----------------|------------|-----------------------------------------------|----------------------|-------------------|-----------------|-----------------|------------------------|-----------|----------------|---|-------------------|--|
|                 | $q$ -value                                                                                                          | $\log_2$ Methylamine | $\log_2$ Methanol | $\log_2$ Sc Sum | $\log_2$ -Ratio | Regulation | $q$ -value                                    | $\log_2$ Methylamine | $\log_2$ Methanol | $\log_2$ PI Sum | $\log_2$ -Ratio | Log <sub>2</sub> Ratio |           | -7             | 0 | 7                 |  |
| <b>MFLA0353</b> |                                                                                                                     | 0.000                | 0.000             |                 |                 |            |                                               | 0.000                | 0.000             |                 |                 |                        |           |                |   |                   |  |
|                 | <i>protein of unknown function DUF72 [Methylobacillus flagellatus KT]637937249 YP_544465</i>                        |                      |                   |                 |                 |            |                                               |                      |                   |                 |                 |                        |           |                |   |                   |  |
| <b>MFLA0354</b> | 4.211                                                                                                               | 2.749                | 4.658             | 1.614           | Y               | ●●         | Y                                             | 9.9 E-2              | 23.090            | 21.474          | 23.497          | 1.064                  | Y         | ●              |   |                   |  |
|                 | <i>ThiI/PfpI [Methylobacillus flagellatus KT]637937250 YP_544466</i>                                                |                      |                   |                 |                 |            |                                               |                      |                   |                 |                 |                        |           |                |   |                   |  |
| <b>MFLA0355</b> | 0.000                                                                                                               | 0.000                |                   |                 |                 |            |                                               | 0.000                | 0.000             |                 |                 |                        |           |                |   |                   |  |
|                 | <i>" transcriptional regulator, TetR family [Methylobacillus flagellatus KT]637937251 YP_544467 ""</i>              |                      |                   |                 |                 |            |                                               |                      |                   |                 |                 |                        |           |                |   |                   |  |
| <b>MFLA0356</b> | 0.000                                                                                                               | 0.000                |                   |                 |                 |            |                                               | 0.000                | 0.000             |                 |                 |                        |           |                |   |                   |  |
|                 | <i>protein of unknown function UPF0153 [Methylobacillus flagellatus KT]637937252 YP_544468</i>                      |                      |                   |                 |                 |            |                                               |                      |                   |                 |                 |                        |           |                |   |                   |  |
| <b>MFLA0357</b> | 1.521                                                                                                               |                      | 1.521             |                 | Y               | ●●         | Y                                             | 20.408               |                   | 20.408          |                 |                        | Y         | ●              |   |                   |  |
|                 | <i>molybdopterin binding domain [Methylobacillus flagellatus KT]637937253 YP_544469</i>                             |                      |                   |                 |                 |            |                                               |                      |                   |                 |                 |                        |           |                |   |                   |  |
| <b>MFLA0358</b> | 8.83 E-2                                                                                                            | 6.262                | 6.431             | 7.349           | -0.172          | Y          | ●●                                            | Y                    | 7.11 E-2          | 24.606          | 25.212          | 25.940                 | -0.587    | Y              | ● |                   |  |
|                 | <i>DNA polymerase I [Methylobacillus flagellatus KT]637937254 YP_544470</i>                                         |                      |                   |                 |                 |            |                                               |                      |                   |                 |                 |                        |           |                |   |                   |  |
| <b>MFLA0359</b> | 5.090                                                                                                               | 4.635                | 5.880             | 0.309           | Y               | ●●         | Y                                             | 2.55 E-1             | 24.521            | 24.595          | 25.558          | -0.296                 | Y         | ●              |   |                   |  |
|                 | <i>conserved hypothetical protein 730 [Methylobacillus flagellatus KT]637937255 YP_544471</i>                       |                      |                   |                 |                 |            |                                               |                      |                   |                 |                 |                        |           |                |   |                   |  |
| <b>MFLA0360</b> | 4.419                                                                                                               | 5.069                | 5.780             | -0.760          | Y               | ●●         | Y                                             | 1.69 E-1             | 25.511            | 25.784          | 26.654          | -0.414                 | Y         | ●              |   |                   |  |
|                 | <i>hypothetical protein [Methylobacillus flagellatus KT]637937256 YP_544472</i>                                     |                      |                   |                 |                 |            |                                               |                      |                   |                 |                 |                        |           |                |   |                   |  |
| <b>MFLA0361</b> | 3.952                                                                                                               | 4.385                | 5.185             | -0.448          | Y               | ●●         | G                                             | 8.9 E-3              | 22.634            | 24.527          | 24.871          | -1.897                 | G         | ●              |   |                   |  |
|                 | <i>homoserine kinase [Methylobacillus flagellatus KT]637937257 YP_544473</i>                                        |                      |                   |                 |                 |            |                                               |                      |                   |                 |                 |                        |           |                |   |                   |  |
| <b>MFLA0362</b> | 0.000                                                                                                               | 0.000                |                   |                 |                 |            |                                               | 0.000                | 0.000             |                 |                 |                        |           |                |   |                   |  |
|                 | <i>hypothetical protein [Methylobacillus flagellatus KT]637937258 YP_544474</i>                                     |                      |                   |                 |                 |            |                                               |                      |                   |                 |                 |                        |           |                |   |                   |  |
| <b>MFLA0363</b> | 6.59 E-2                                                                                                            | 5.458                | 5.702             | 6.585           | -0.287          | Y          | ●●                                            | Y                    | 2.61 E-1          | 24.497          | 24.555          | 25.527                 | -0.261    | Y              | ● |                   |  |
|                 | <i>UvrD/REP helicase [Methylobacillus flagellatus KT]637937259 YP_544475</i>                                        |                      |                   |                 |                 |            |                                               |                      |                   |                 |                 |                        |           |                |   |                   |  |
| <b>MFLA0364</b> | 13.061                                                                                                              | 13.144               | 14.103            | -0.095          | Y               | ●●         | Y                                             | 1.04 E-1             | 33.607            | 33.248          | 34.439          | 0.312                  | Y         | ●              |   |                   |  |
|                 | <i>chaperonin GroEL [Methylobacillus flagellatus KT]637937260 YP_544476</i>                                         |                      |                   |                 |                 |            |                                               |                      |                   |                 |                 |                        |           |                |   |                   |  |
| <b>MFLA0365</b> | 7.702                                                                                                               | 7.582                | 8.643             | 0.158           | Y               | ●●         | Y                                             | 3.18 E-2             | 30.280            | 29.807          | 31.063          | 0.466                  | Y         | ●              |   |                   |  |
|                 | <i>chaperonin Cpn10 [Methylobacillus flagellatus KT]637937261 YP_544477</i>                                         |                      |                   |                 |                 |            |                                               |                      |                   |                 |                 |                        |           |                |   |                   |  |
| <b>MFLA0366</b> | 0.000                                                                                                               | 0.000                |                   |                 |                 |            |                                               | 0.000                | 0.000             |                 |                 |                        |           |                |   |                   |  |
|                 | <i>hypothetical protein [Methylobacillus flagellatus KT]637937262 YP_544478</i>                                     |                      |                   |                 |                 |            |                                               |                      |                   |                 |                 |                        |           |                |   |                   |  |
| <b>MFLA0367</b> | 0.000                                                                                                               | 0.000                |                   |                 |                 |            |                                               | 0.000                | 0.000             |                 |                 |                        |           |                |   |                   |  |
|                 | <i>hypothetical protein [Methylobacillus flagellatus KT]637937263 YP_544479</i>                                     |                      |                   |                 |                 |            |                                               |                      |                   |                 |                 |                        |           |                |   |                   |  |
| <b>MFLA0368</b> | 0.000                                                                                                               | 0.000                |                   |                 |                 |            |                                               | 0.000                | 0.000             |                 |                 |                        |           |                |   |                   |  |
|                 | <i>" transcriptional regulator, TetR family [Methylobacillus flagellatus KT]637937264 YP_544480 ""</i>              |                      |                   |                 |                 |            |                                               |                      |                   |                 |                 |                        |           |                |   |                   |  |
| <b>MFLA0369</b> | 7.794                                                                                                               | 7.758                | 8.776             | -0.001          | Y               | ●●         | Y                                             | 4.4 E-2              | 27.675            | 28.221          | 28.974          | -0.534                 | Y         | ●              |   |                   |  |
|                 | <i>NADH:flavin oxidoreductase/NADH oxidase [Methylobacillus flagellatus KT]637937265 YP_544481</i>                  |                      |                   |                 |                 |            |                                               |                      |                   |                 |                 |                        |           |                |   |                   |  |
| <b>MFLA0370</b> | 0.000                                                                                                               | 0.000                |                   |                 |                 |            |                                               | 0.000                | 0.000             |                 |                 |                        |           |                |   |                   |  |
|                 | <i>" transcriptional regulator, ArsR family [Methylobacillus flagellatus KT]637937266 YP_544482 ""</i>              |                      |                   |                 |                 |            |                                               |                      |                   |                 |                 |                        |           |                |   |                   |  |
| <b>MFLA0371</b> | 2.521                                                                                                               |                      | 2.521             |                 | Y               | ●●         | Y                                             | 20.663               |                   | 20.663          |                 |                        | Y         | ●              |   |                   |  |
|                 | <i>hypothetical protein [Methylobacillus flagellatus KT]637937267 YP_544483</i>                                     |                      |                   |                 |                 |            |                                               |                      |                   |                 |                 |                        |           |                |   |                   |  |
| <b>MFLA0372</b> | 0                                                                                                                   | 8.125                | 4.554             | 8.241           | 3.591           | R          | ●●                                            | R                    | 6.36 E-3          | 28.283          | 23.066          | 28.322                 | 5.225     | R              | ● |                   |  |
|                 | <i>" RND efflux system, outer membrane lipoprotein, NodT [Methylobacillus flagellatus KT]637937268 YP_544484 ""</i> |                      |                   |                 |                 |            |                                               |                      |                   |                 |                 |                        |           |                |   |                   |  |
| <b>MFLA0373</b> | 0                                                                                                                   | 9.340                | 8.148             | 9.864           | 1.167           | R          | ●●                                            | Y                    | 4.29 E-2          | 28.645          | 27.110          | 29.073                 | 1.436     | R              | ● |                   |  |
|                 | <i>Hydrophobe/amphiphile efflux-1 HAE1 [Methylobacillus flagellatus KT]637937269 YP_544485</i>                      |                      |                   |                 |                 |            |                                               |                      |                   |                 |                 |                        |           |                |   |                   |  |
| <b>MFLA0374</b> | 0                                                                                                                   | 8.925                | 8.217             | 9.614           | 0.679           | R          | ●●                                            | Y                    | 2.21 E-2          | 28.764          | 27.510          | 29.269                 | 1.234     | R              | ● |                   |  |
|                 | <i>secretion protein HlyD [Methylobacillus flagellatus KT]637937270 YP_544486</i>                                   |                      |                   |                 |                 |            |                                               |                      |                   |                 |                 |                        |           |                |   |                   |  |

| ORF             | AM/OH <i>M. Flagellatus</i> Spectral Count                                                                                      |                      |                   |                 |                |            | AM/OH <i>M. Flagellatus</i> Protein Intensity |                      |                   |                 |                |           | Spectral Count         |   | Protein Intensity |  |
|-----------------|---------------------------------------------------------------------------------------------------------------------------------|----------------------|-------------------|-----------------|----------------|------------|-----------------------------------------------|----------------------|-------------------|-----------------|----------------|-----------|------------------------|---|-------------------|--|
|                 | $q$ -value                                                                                                                      | $\log_2$ Methylamine | $\log_2$ Methanol | $\log_2$ Sc Sum | $\log_2$ Ratio | Regulation | $q$ -value                                    | $\log_2$ Methylamine | $\log_2$ Methanol | $\log_2$ PI Sum | $\log_2$ Ratio | Consensus | Log <sub>2</sub> Ratio |   |                   |  |
| <b>MFLA0375</b> |                                                                                                                                 | 0.000                | 0.000             |                 |                |            |                                               | 0.000                | 0.000             |                 |                |           |                        |   |                   |  |
|                 | <i>hypothetical protein [Methylobacillus flagellatus KT]637937271 YP_544487</i>                                                 |                      |                   |                 |                |            |                                               |                      |                   |                 |                |           |                        |   |                   |  |
| <b>MFLA0376</b> |                                                                                                                                 | 0.000                | 0.000             |                 |                |            |                                               | 0.000                | 0.000             |                 |                |           |                        |   |                   |  |
|                 | <i>hypothetical protein [Methylobacillus flagellatus KT]637937272 YP_544488</i>                                                 |                      |                   |                 |                |            |                                               |                      |                   |                 |                |           |                        |   |                   |  |
| <b>MFLA0377</b> |                                                                                                                                 | 3.221                | 1.585             | 3.623           | 1.636          | Y          |                                               | 20.676               | 19.546            | 21.219          | 1.130          | Y         |                        |   |                   |  |
|                 | <i>adenosylmethionine-8-amino-7-oxononanoate aminotransferase [Methylobacillus flagellatus KT]637937273 YP_544489</i>           |                      |                   |                 |                |            |                                               |                      |                   |                 |                |           |                        |   |                   |  |
| <b>MFLA0378</b> |                                                                                                                                 | 4.247                | 4.800             | 5.550           | -0.551         | Y          |                                               | 6.36 E-3             | 21.425            | 23.471          | 23.784         | -2.170    | G                      |   |                   |  |
|                 | <i>D-alanyl-D-alanine carboxypeptidase/D-alanyl-D-alanine-endopeptidase [Methylobacillus flagellatus KT]637937274 YP_544490</i> |                      |                   |                 |                |            |                                               |                      |                   |                 |                |           |                        |   |                   |  |
| <b>MFLA0379</b> |                                                                                                                                 | 8.648                | 8.109             | 9.403           | -0.086         | Y          |                                               | 5.87 E-2             | 26.794            | 27.327          | 28.085         | -0.589    | Y                      |   |                   |  |
|                 | <i>Peptidylprolyl isomerase [Methylobacillus flagellatus KT]637937275 YP_544491</i>                                             |                      |                   |                 |                |            |                                               |                      |                   |                 |                |           |                        |   |                   |  |
| <b>MFLA0380</b> |                                                                                                                                 | 3.514                | 4.975             | 5.422           | -0.405         | Y          |                                               | 1.39 E-1             | 22.625            | 24.028          | 24.491         | -0.367    | Y                      |   |                   |  |
|                 | <i>OsmC-like protein [Methylobacillus flagellatus KT]637937276 YP_544492</i>                                                    |                      |                   |                 |                |            |                                               |                      |                   |                 |                |           |                        |   |                   |  |
| <b>MFLA0381</b> |                                                                                                                                 | 2.621                |                   | 2.621           |                | Y          |                                               | 19.851               |                   | 19.851          |                |           | Y                      |   |                   |  |
|                 | <i>Glyoxalase/bleomycin resistance protein/dioxygenase [Methylobacillus flagellatus KT]637937277 YP_544493</i>                  |                      |                   |                 |                |            |                                               |                      |                   |                 |                |           |                        |   |                   |  |
| <b>MFLA0382</b> |                                                                                                                                 | 5.046                | 4.328             | 5.731           | 0.747          | Y          |                                               | 2.81 E-2             | 24.170            | 25.185          | 25.765         | -1.159    | Y                      |   |                   |  |
|                 | <i>hypothetical protein [Methylobacillus flagellatus KT]637937278 YP_544494</i>                                                 |                      |                   |                 |                |            |                                               |                      |                   |                 |                |           |                        |   |                   |  |
| <b>MFLA0383</b> |                                                                                                                                 | 6.52 E-3             | 8.051             | 8.278           | 9.169          | -0.230     | Y                                             |                      | 1.93 E-1          | 28.059          | 28.191         | 29.127    | -0.097                 | Y |                   |  |
|                 | <i>carboxyl-terminal protease [Methylobacillus flagellatus KT]637937279 YP_544495</i>                                           |                      |                   |                 |                |            |                                               |                      |                   |                 |                |           |                        |   |                   |  |
| <b>MFLA0384</b> |                                                                                                                                 |                      | 2.862             | 2.862           |                | Y          |                                               |                      | 22.717            | 22.717          |                |           | Y                      |   |                   |  |
|                 | <i>SelT/selW/selH selenoprotein [Methylobacillus flagellatus KT]637937280 YP_544496</i>                                         |                      |                   |                 |                |            |                                               |                      |                   |                 |                |           |                        |   |                   |  |
| <b>MFLA0385</b> |                                                                                                                                 |                      | 2.585             | 2.585           |                | Y          |                                               |                      | 21.226            | 21.226          |                |           | Y                      |   |                   |  |
|                 | <i>diguanylate phosphodiesterase (EAL domain) [Methylobacillus flagellatus KT]637937281 YP_544497</i>                           |                      |                   |                 |                |            |                                               |                      |                   |                 |                |           |                        |   |                   |  |
| <b>MFLA0386</b> |                                                                                                                                 | 0                    | 9.347             | 10.155          | 10.807         | -0.810     | G                                             |                      | 1.17 E-2          | 28.416          | 29.710         | 30.204    | -1.326                 | G |                   |  |
|                 | <i>Superoxide dismutase [Methylobacillus flagellatus KT]637937282 YP_544498</i>                                                 |                      |                   |                 |                |            |                                               |                      |                   |                 |                |           |                        |   |                   |  |
| <b>MFLA0387</b> |                                                                                                                                 | 0.000                | 0.000             |                 |                |            |                                               | 0.000                | 0.000             |                 |                |           |                        |   |                   |  |
|                 | <i>zinc/iron permease [Methylobacillus flagellatus KT]637937283 YP_544499</i>                                                   |                      |                   |                 |                |            |                                               |                      |                   |                 |                |           |                        |   |                   |  |
| <b>MFLA0388</b> |                                                                                                                                 | 0.000                | 0.000             |                 |                |            |                                               | 0.000                | 0.000             |                 |                |           |                        |   |                   |  |
|                 | <i>NLP/P60 [Methylobacillus flagellatus KT]637937284 YP_544500</i>                                                              |                      |                   |                 |                |            |                                               |                      |                   |                 |                |           |                        |   |                   |  |
| <b>MFLA0389</b> |                                                                                                                                 | 3.224                |                   | 3.224           |                | Y          |                                               | 21.429               |                   | 21.429          |                |           | Y                      |   |                   |  |
|                 | <i>hypothetical protein [Methylobacillus flagellatus KT]637937285 YP_544501</i>                                                 |                      |                   |                 |                |            |                                               |                      |                   |                 |                |           |                        |   |                   |  |
| <b>MFLA0390</b> |                                                                                                                                 | 1.44 E-1             | 6.341             | 6.432           | 7.387          | -0.092     | Y                                             |                      | 1.99 E-2          | 25.506          | 25.717         | 26.615    | -0.211                 | Y |                   |  |
|                 | <i>ABC-1 [Methylobacillus flagellatus KT]637937286 YP_544502</i>                                                                |                      |                   |                 |                |            |                                               |                      |                   |                 |                |           |                        |   |                   |  |
| <b>MFLA0391</b> |                                                                                                                                 | 4.471                | 4.540             | 5.506           | 0.005          | Y          |                                               | 9.14 E-2             | 22.638            | 22.967          | 23.812         | -0.306    | Y                      |   |                   |  |
|                 | <i>protein of unknown function DUF404 [Methylobacillus flagellatus KT]637937287 YP_544503</i>                                   |                      |                   |                 |                |            |                                               |                      |                   |                 |                |           |                        |   |                   |  |
| <b>MFLA0392</b> |                                                                                                                                 | 1.813                | 2.949             | 3.490           | 0.055          | Y          |                                               | 1.34 E-1             | 18.064            | 20.647          | 20.870         | -1.298    | Y                      |   |                   |  |
|                 | <i>protein of unknown function DUF403 [Methylobacillus flagellatus KT]637937288 YP_544504</i>                                   |                      |                   |                 |                |            |                                               |                      |                   |                 |                |           |                        |   |                   |  |
| <b>MFLA0393</b> |                                                                                                                                 | 0.000                | 0.000             |                 |                |            |                                               | 0.000                | 0.000             |                 |                |           |                        |   |                   |  |
|                 | <i>transglutaminase-like protein [Methylobacillus flagellatus KT]637937289 YP_544505</i>                                        |                      |                   |                 |                |            |                                               |                      |                   |                 |                |           |                        |   |                   |  |
| <b>MFLA0394</b> |                                                                                                                                 | 1.21 E-2             | 5.000             | 5.293           | 6.154          | -0.202     | Y                                             |                      | 5.44 E-2          | 22.750          | 23.917         | 24.448    | -1.737                 | Y |                   |  |
|                 | <i>hypothetical protein [Methylobacillus flagellatus KT]637937290 YP_544506</i>                                                 |                      |                   |                 |                |            |                                               |                      |                   |                 |                |           |                        |   |                   |  |
| <b>MFLA0395</b> |                                                                                                                                 | 0.000                | 0.000             |                 |                |            |                                               | 0.000                | 0.000             |                 |                |           |                        |   |                   |  |
|                 | <i>hypothetical protein [Methylobacillus flagellatus KT]637937291 YP_544507</i>                                                 |                      |                   |                 |                |            |                                               |                      |                   |                 |                |           |                        |   |                   |  |
| <b>MFLA0396</b> |                                                                                                                                 | 0.000                | 0.000             |                 |                |            |                                               | 0.000                | 0.000             |                 |                |           |                        |   |                   |  |
|                 | <i>peptidase U32 [Methylobacillus flagellatus KT]637937292 YP_544508</i>                                                        |                      |                   |                 |                |            |                                               |                      |                   |                 |                |           |                        |   |                   |  |

| ORF             | AM/OH <i>M. Flagellatus</i> Spectral Count                                                                          |                              |                           |                         |                        |            | AM/OH <i>M. Flagellatus</i> Protein Intensity |                              |                           |                         |                        |                        | Consensus | Spectral Count |   | Protein Intensity |  |
|-----------------|---------------------------------------------------------------------------------------------------------------------|------------------------------|---------------------------|-------------------------|------------------------|------------|-----------------------------------------------|------------------------------|---------------------------|-------------------------|------------------------|------------------------|-----------|----------------|---|-------------------|--|
|                 | q-value                                                                                                             | log <sub>2</sub> Methylamine | log <sub>2</sub> Methanol | log <sub>2</sub> Sc Sum | log <sub>2</sub> Ratio | Regulation | q-value                                       | log <sub>2</sub> Methylamine | log <sub>2</sub> Methanol | log <sub>2</sub> PI Sum | log <sub>2</sub> Ratio | Log <sub>2</sub> Ratio |           | -7             | 0 | 7                 |  |
| <b>MFLA0397</b> |                                                                                                                     | 0.000                        | 0.000                     |                         |                        |            |                                               | 0.000                        | 0.000                     |                         |                        |                        |           |                |   |                   |  |
|                 | " transcriptional regulator, AraC family [Methylobacillus flagellatus KT]637937293 YP_544509 ""                     |                              |                           |                         |                        |            |                                               |                              |                           |                         |                        |                        |           |                |   |                   |  |
| <b>MFLA0398</b> |                                                                                                                     | 0.000                        | 0.000                     |                         |                        |            |                                               | 0.000                        | 0.000                     |                         |                        |                        |           |                |   |                   |  |
|                 | hypothetical protein [Methylobacillus flagellatus KT]637937294 YP_544510                                            |                              |                           |                         |                        |            |                                               |                              |                           |                         |                        |                        |           |                |   |                   |  |
| <b>MFLA0399</b> | 4.807                                                                                                               | 4.219                        | 5.543                     | 0.460                   | Y                      | ●●         | Y                                             | 8.36 E-2                     | 23.809                    | 23.365                  | 24.604                 | 0.404                  | Y         | ●              |   |                   |  |
|                 | " D-isomer specific 2-hydroxyacid dehydrogenase, NAD-binding [Methylobacillus flagellatus KT]637937295 YP_544511 "" |                              |                           |                         |                        |            |                                               |                              |                           |                         |                        |                        |           |                |   |                   |  |
| <b>MFLA0400</b> | 8.28 E-3                                                                                                            | 5.364                        | 6.003                     | 6.719                   | -0.640                 | G          | ●●                                            | Y                            | 4.79 E-2                  | 24.463                  | 25.401                 | 26.007                 | -0.890    | G              | ● |                   |  |
|                 | aldo/keto reductase [Methylobacillus flagellatus KT]637937296 YP_544512                                             |                              |                           |                         |                        |            |                                               |                              |                           |                         |                        |                        |           |                |   |                   |  |
| <b>MFLA0401</b> | 2.521                                                                                                               | 2.816                        | 3.676                     | 0.762                   | Y                      | ●●         | Y                                             | 1.75 E-1                     | 20.710                    | 21.448                  | 22.126                 | 0.324                  | Y         | ●              |   |                   |  |
|                 | " 20S proteasome, A and B subunits [Methylobacillus flagellatus KT]637937297 YP_544513 ""                           |                              |                           |                         |                        |            |                                               |                              |                           |                         |                        |                        |           |                |   |                   |  |
| <b>MFLA0402</b> |                                                                                                                     | 0.000                        | 0.000                     |                         |                        | Y          | ●●                                            | Y                            |                           | 18.214                  | 18.214                 |                        | Y         | ●              |   |                   |  |
|                 | " transcriptional regulator, LysR family [Methylobacillus flagellatus KT]637937298 YP_544514 ""                     |                              |                           |                         |                        |            |                                               |                              |                           |                         |                        |                        |           |                |   |                   |  |
| <b>MFLA0403</b> |                                                                                                                     | 0.000                        | 0.000                     |                         |                        |            |                                               | 0.000                        | 0.000                     |                         |                        |                        |           |                |   |                   |  |
|                 | transmembrane pair [Methylobacillus flagellatus KT]637937299 YP_544515                                              |                              |                           |                         |                        |            |                                               |                              |                           |                         |                        |                        |           |                |   |                   |  |
| <b>MFLA0404</b> |                                                                                                                     | 0.000                        | 0.000                     |                         |                        |            |                                               | 0.000                        | 0.000                     |                         |                        |                        |           |                |   |                   |  |
|                 | putative ATP-dependent DNA helicase-related protein [Methylobacillus flagellatus KT]637937300 YP_544516             |                              |                           |                         |                        |            |                                               |                              |                           |                         |                        |                        |           |                |   |                   |  |
| <b>MFLA0405</b> |                                                                                                                     | 0.000                        | 0.000                     |                         |                        |            |                                               | 0.000                        | 0.000                     |                         |                        |                        |           |                |   |                   |  |
|                 | [Methylobacillus flagellatus KT]639329600                                                                           |                              |                           |                         |                        |            |                                               |                              |                           |                         |                        |                        |           |                |   |                   |  |
| <b>MFLA0406</b> |                                                                                                                     | 0.000                        | 0.000                     |                         |                        |            |                                               | 0.000                        | 0.000                     |                         |                        |                        |           |                |   |                   |  |
|                 | hypothetical protein [Methylobacillus flagellatus KT]637937301 YP_544517                                            |                              |                           |                         |                        |            |                                               |                              |                           |                         |                        |                        |           |                |   |                   |  |
| <b>MFLA0407</b> |                                                                                                                     | 0.000                        | 0.000                     |                         |                        |            |                                               | 0.000                        | 0.000                     |                         |                        |                        |           |                |   |                   |  |
|                 | hypothetical protein [Methylobacillus flagellatus KT]637937302 YP_544518                                            |                              |                           |                         |                        |            |                                               |                              |                           |                         |                        |                        |           |                |   |                   |  |
| <b>MFLA0408</b> | 4.259                                                                                                               | 5.034                        | 5.698                     | -0.778                  | Y                      | ●●         | G                                             | 4.29 E-3                     | 22.791                    | 23.862                  | 24.424                 | -1.077                 | G         | ●              |   |                   |  |
|                 | " Leucine-rich repeat, typical subtype [Methylobacillus flagellatus KT]637937303 YP_544519 ""                       |                              |                           |                         |                        |            |                                               |                              |                           |                         |                        |                        |           |                |   |                   |  |
| <b>MFLA0409</b> |                                                                                                                     | 0.000                        | 0.000                     |                         |                        |            |                                               | 0.000                        | 0.000                     |                         |                        |                        |           |                |   |                   |  |
|                 | cation efflux protein [Methylobacillus flagellatus KT]637937304 YP_544520                                           |                              |                           |                         |                        |            |                                               |                              |                           |                         |                        |                        |           |                |   |                   |  |
| <b>MFLA0410</b> | 2.521                                                                                                               | 2.140                        | 3.343                     | 1.394                   | Y                      | ●●         | Y                                             | 5.2 E-2                      | 20.743                    | 20.441                  | 21.600                 | 1.345                  | Y         | ●              |   |                   |  |
|                 | Integron integrase [Methylobacillus flagellatus KT]637937305 YP_544521                                              |                              |                           |                         |                        |            |                                               |                              |                           |                         |                        |                        |           |                |   |                   |  |
| <b>MFLA0411</b> | 2.691                                                                                                               | 2.966                        | 3.835                     | 0.725                   | Y                      | ●●         | Y                                             | 9.07 E-2                     | 20.731                    | 22.161                  | 22.617                 | -0.422                 | Y         | ●              |   |                   |  |
|                 | Helicase c2 [Methylobacillus flagellatus KT]637937306 YP_544522                                                     |                              |                           |                         |                        |            |                                               |                              |                           |                         |                        |                        |           |                |   |                   |  |
| <b>MFLA0412</b> | 1.521                                                                                                               | 3.205                        | 3.596                     | -0.641                  | Y                      | ●●         | Y                                             | 3.53 E-2                     | 21.767                    | 21.157                  | 22.494                 | 1.632                  | Y         | ●              |   |                   |  |
|                 | " peptidase M22, glycoprotease [Methylobacillus flagellatus KT]637937307 YP_544523 ""                               |                              |                           |                         |                        |            |                                               |                              |                           |                         |                        |                        |           |                |   |                   |  |
| <b>MFLA0413</b> | 0.813                                                                                                               | 1.000                        | 1.910                     | -0.187                  | Y                      | ●●         | Y                                             | 20.398                       | 19.628                    | 21.064                  | 0.770                  | Y                      | ●         |                |   |                   |  |
|                 | ribosomal-protein-alanine acetyltransferase [Methylobacillus flagellatus KT]637937308 YP_544524                     |                              |                           |                         |                        |            |                                               |                              |                           |                         |                        |                        |           |                |   |                   |  |
| <b>MFLA0414</b> | 3.053                                                                                                               | 0.585                        | 3.293                     | 1.278                   | Y                      | ●●         | Y                                             | 1.04 E-1                     | 20.969                    | 20.740                  | 21.859                 | -0.878                 | Y         | ●              |   |                   |  |
|                 | phage SPO1 DNA polymerase-related protein [Methylobacillus flagellatus KT]637937309 YP_544525                       |                              |                           |                         |                        |            |                                               |                              |                           |                         |                        |                        |           |                |   |                   |  |
| <b>MFLA0415</b> | 0                                                                                                                   | 7.624                        | 5.644                     | 7.950                   | 1.943                  | R          | ●●                                            | Y                            | 5.18 E-2                  | 29.221                  | 26.800                 | 29.468                 | 2.337     | R              | ● |                   |  |
|                 | LemA [Methylobacillus flagellatus KT]637937310 YP_544526                                                            |                              |                           |                         |                        |            |                                               |                              |                           |                         |                        |                        |           |                |   |                   |  |
| <b>MFLA0416</b> | 4.430                                                                                                               | 2.966                        | 4.876                     | 1.286                   | Y                      | ●●         | Y                                             | 6.9 E-2                      | 24.247                    | 22.545                  | 24.634                 | 1.520                  | Y         | ●              |   |                   |  |
|                 | protein of unknown function DUF477 [Methylobacillus flagellatus KT]637937311 YP_544527                              |                              |                           |                         |                        |            |                                               |                              |                           |                         |                        |                        |           |                |   |                   |  |
| <b>MFLA0417</b> | 1.48 E-1                                                                                                            | 5.077                        | 4.924                     | 6.002                   | 0.161                  | Y          | ●●                                            | Y                            | 1.54 E-1                  | 22.846                  | 23.235                 | 24.053                 | -0.679    | Y              | ● |                   |  |
|                 | protein of unknown function DUF477 [Methylobacillus flagellatus KT]637937312 YP_544528                              |                              |                           |                         |                        |            |                                               |                              |                           |                         |                        |                        |           |                |   |                   |  |
| <b>MFLA0418</b> |                                                                                                                     | 0.585                        | 0.585                     |                         |                        | Y          | ●●                                            | Y                            |                           | 21.567                  | 21.567                 |                        | Y         | ●              |   |                   |  |
|                 | hypothetical protein [Methylobacillus flagellatus KT]637937313 YP_544529                                            |                              |                           |                         |                        |            |                                               |                              |                           |                         |                        |                        |           |                |   |                   |  |

| ORF             | AM/OH <i>M. Flagellatus</i> Spectral Count                                                                                     |                              |                           |                         |                        | AM/OH <i>M. Flagellatus</i> Protein Intensity |          |                              |                           |                         | Spectral Count         |           | Protein Intensity      |                        |
|-----------------|--------------------------------------------------------------------------------------------------------------------------------|------------------------------|---------------------------|-------------------------|------------------------|-----------------------------------------------|----------|------------------------------|---------------------------|-------------------------|------------------------|-----------|------------------------|------------------------|
|                 | q-value                                                                                                                        | log <sub>2</sub> Methylamine | log <sub>2</sub> Methanol | log <sub>2</sub> Sc Sum | log <sub>2</sub> Ratio | Regulation                                    | q-value  | log <sub>2</sub> Methylamine | log <sub>2</sub> Methanol | log <sub>2</sub> PI Sum | log <sub>2</sub> Ratio | Consensus | Log <sub>2</sub> Ratio | Log <sub>2</sub> Ratio |
| <b>MFLA0419</b> |                                                                                                                                | 5.064                        | 6.452                     | 6.919                   | -1.187                 | Y ●● Y                                        | 8.15 E-2 | 25.118                       | 25.634                    | 26.399                  | -0.604                 | Y ●       |                        |                        |
|                 | <i>hypothetical protein [Methylobacillus flagellatus KT]637937314 YP_544530</i>                                                |                              |                           |                         |                        |                                               |          |                              |                           |                         |                        |           |                        |                        |
| <b>MFLA0420</b> | 8.97 E-11                                                                                                                      | 6.757                        | 7.604                     | 8.242                   | -0.845                 | G ●● Y                                        | 9.62 E-2 | 26.295                       | 26.770                    | 27.552                  | -0.610                 | G ●       |                        |                        |
|                 | <i>prolyl-tRNA synthetase [Methylobacillus flagellatus KT]637937315 YP_544531</i>                                              |                              |                           |                         |                        |                                               |          |                              |                           |                         |                        |           |                        |                        |
| <b>MFLA0421</b> |                                                                                                                                |                              | 1.322                     | 1.322                   |                        | Y ●● Y                                        |          |                              | 19.097                    | 19.097                  |                        | Y ●       |                        |                        |
|                 | <i>" Lytic transglycosylase, catalytic [Methylobacillus flagellatus KT]637937316 YP_544532 ""</i>                              |                              |                           |                         |                        |                                               |          |                              |                           |                         |                        |           |                        |                        |
| <b>MFLA0422</b> |                                                                                                                                | 0.000                        | 0.000                     |                         |                        | ●●                                            |          | 0.000                        | 0.000                     |                         |                        | ●         |                        |                        |
|                 | <i>hypothetical protein [Methylobacillus flagellatus KT]637937317 YP_544533</i>                                                |                              |                           |                         |                        |                                               |          |                              |                           |                         |                        |           |                        |                        |
| <b>MFLA0423</b> |                                                                                                                                | 4.926                        | 4.938                     | 5.932                   | -0.015                 | Y ●● Y                                        | 1.35 E-1 | 22.531                       | 22.949                    | 23.755                  | -0.644                 | Y ●       |                        |                        |
|                 | <i>S-adenosylmethionine [Methylobacillus flagellatus KT]637937318 YP_544534</i>                                                |                              |                           |                         |                        |                                               |          |                              |                           |                         |                        |           |                        |                        |
| <b>MFLA0424</b> |                                                                                                                                |                              | 2.816                     | 2.816                   |                        | Y ●● Y                                        |          |                              | 20.094                    | 20.094                  |                        | Y ●       |                        |                        |
|                 | <i>PepSY-associated TM helix [Methylobacillus flagellatus KT]637937320 YP_544535</i>                                           |                              |                           |                         |                        |                                               |          |                              |                           |                         |                        |           |                        |                        |
| <b>MFLA0425</b> | 7.35 E-9                                                                                                                       | 6.528                        | 5.424                     | 7.079                   | 1.087                  | R ●● Y                                        | 5.97 E-2 | 25.034                       | 25.779                    | 26.454                  | -0.766                 | Y ●       |                        |                        |
|                 | <i>hypothetical protein [Methylobacillus flagellatus KT]637937321 YP_544536</i>                                                |                              |                           |                         |                        |                                               |          |                              |                           |                         |                        |           |                        |                        |
| <b>MFLA0426</b> | 8.81 E-17                                                                                                                      | 5.668                        | 7.035                     | 7.508                   | -1.344                 | G ●● G                                        | 4.1 E-3  | 25.204                       | 27.649                    | 27.892                  | -2.443                 | G ●       |                        |                        |
|                 | <i>hypothetical protein [Methylobacillus flagellatus KT]637937322 YP_544537</i>                                                |                              |                           |                         |                        |                                               |          |                              |                           |                         |                        |           |                        |                        |
| <b>MFLA0427</b> |                                                                                                                                |                              | 3.523                     | 3.523                   |                        | Y ●● Y                                        |          |                              | 22.837                    | 22.837                  |                        | Y ●       |                        |                        |
|                 | <i>ApbE-like lipoprotein [Methylobacillus flagellatus KT]637937323 YP_544538</i>                                               |                              |                           |                         |                        |                                               |          |                              |                           |                         |                        |           |                        |                        |
| <b>MFLA0428</b> |                                                                                                                                | 2.906                        | 3.301                     | 4.117                   | -0.571                 | Y ●● Y                                        | 2.45 E-2 | 20.123                       | 21.589                    | 22.035                  | -1.563                 | Y ●       |                        |                        |
|                 | <i>flavodoxin/nitric oxide synthase [Methylobacillus flagellatus KT]637937324 YP_544539</i>                                    |                              |                           |                         |                        |                                               |          |                              |                           |                         |                        |           |                        |                        |
| <b>MFLA0429</b> |                                                                                                                                | 0.000                        | 0.000                     |                         |                        | ●●                                            |          | 0.000                        | 0.000                     |                         |                        | ●         |                        |                        |
|                 | <i>diguanylate cyclase (GGDEF domain) [Methylobacillus flagellatus KT]637937325 YP_544540</i>                                  |                              |                           |                         |                        |                                               |          |                              |                           |                         |                        |           |                        |                        |
| <b>MFLA0430</b> |                                                                                                                                | 1.843                        | 0.000                     | 2.197                   | 1.843                  | Y ●● Y                                        |          | 19.913                       | 20.360                    | 21.154                  | -0.447                 | Y ●       |                        |                        |
|                 | <i>multi-sensor signal transduction histidine kinase [Methylobacillus flagellatus KT]637937326 YP_544541</i>                   |                              |                           |                         |                        |                                               |          |                              |                           |                         |                        |           |                        |                        |
| <b>MFLA0431</b> |                                                                                                                                | 4.586                        | 4.425                     | 5.508                   | 0.201                  | Y ●● Y                                        | 6.21 E-2 | 21.382                       | 21.864                    | 22.643                  | -0.493                 | Y ●       |                        |                        |
|                 | <i>Peptidoglycan-binding LysM [Methylobacillus flagellatus KT]637937327 YP_544542</i>                                          |                              |                           |                         |                        |                                               |          |                              |                           |                         |                        |           |                        |                        |
| <b>MFLA0432</b> |                                                                                                                                | 4.003                        | 3.769                     | 4.890                   | 0.155                  | Y ●● Y                                        | 2.2 E-1  | 22.510                       | 22.329                    | 23.422                  | -0.006                 | Y ●       |                        |                        |
|                 | <i>" two component transcriptional regulator, winged helix family [Methylobacillus flagellatus KT]637937328 YP_544543 ""</i>   |                              |                           |                         |                        |                                               |          |                              |                           |                         |                        |           |                        |                        |
| <b>MFLA0433</b> | 1.49 E-1                                                                                                                       | 4.741                        | 5.061                     | 5.910                   | -0.365                 | Y ●● Y                                        | 8.15 E-2 | 26.349                       | 26.668                    | 27.517                  | -0.352                 | Y ●       |                        |                        |
|                 | <i>" nitrogen regulatory protein P-II (GlnB, GlnK) [Methylobacillus flagellatus KT]637937329 YP_544544 ""</i>                  |                              |                           |                         |                        |                                               |          |                              |                           |                         |                        |           |                        |                        |
| <b>MFLA0434</b> |                                                                                                                                | 0.000                        | 0.000                     |                         |                        | ●●                                            |          | 0.000                        | 0.000                     |                         |                        | ●         |                        |                        |
|                 | <i>ammonium transporter [Methylobacillus flagellatus KT]637937330 YP_544545</i>                                                |                              |                           |                         |                        |                                               |          |                              |                           |                         |                        |           |                        |                        |
| <b>MFLA0435</b> |                                                                                                                                | 0.000                        | 0.000                     |                         |                        | ●●                                            |          | 0.000                        | 0.000                     |                         |                        | ●         |                        |                        |
|                 | <i>acyltransferase 3 [Methylobacillus flagellatus KT]637937331 YP_544546</i>                                                   |                              |                           |                         |                        |                                               |          |                              |                           |                         |                        |           |                        |                        |
| <b>MFLA0436</b> |                                                                                                                                | 0.000                        | 0.000                     |                         |                        | ●●                                            |          | 0.000                        | 0.000                     |                         |                        | ●         |                        |                        |
|                 | <i>GCN5-related N-acetyltransferase [Methylobacillus flagellatus KT]637937332 YP_544547</i>                                    |                              |                           |                         |                        |                                               |          |                              |                           |                         |                        |           |                        |                        |
| <b>MFLA0437</b> |                                                                                                                                | 4.757                        | 3.897                     | 5.390                   | 0.852                  | Y ●● R                                        | 4.29 E-3 | 23.221                       | 21.973                    | 23.728                  | 1.248                  | R ●       |                        |                        |
|                 | <i>" transcriptional regulator, XRE family with cupin sensor domain [Methylobacillus flagellatus KT]637937333 YP_544548 ""</i> |                              |                           |                         |                        |                                               |          |                              |                           |                         |                        |           |                        |                        |
| <b>MFLA0438</b> |                                                                                                                                | 3.908                        | 2.871                     | 4.480                   | 0.809                  | Y ●● Y                                        | 3.18 E-2 | 21.008                       | 22.251                    | 22.759                  | -1.604                 | Y ●       |                        |                        |
|                 | <i>hypothetical protein [Methylobacillus flagellatus KT]637937334 YP_544549</i>                                                |                              |                           |                         |                        |                                               |          |                              |                           |                         |                        |           |                        |                        |
| <b>MFLA0439</b> |                                                                                                                                | 2.923                        |                           | 2.923                   |                        | Y ●● Y                                        |          | 20.747                       |                           | 20.747                  |                        | Y ●       |                        |                        |
|                 | <i>Aminomethyltransferase [Methylobacillus flagellatus KT]637937335 YP_544550</i>                                              |                              |                           |                         |                        |                                               |          |                              |                           |                         |                        |           |                        |                        |
| <b>MFLA0440</b> |                                                                                                                                | 0.000                        | 0.000                     |                         |                        | ●●                                            |          | 0.000                        | 0.000                     |                         |                        | ●         |                        |                        |
|                 | <i>hypothetical protein [Methylobacillus flagellatus KT]637937336 YP_544551</i>                                                |                              |                           |                         |                        |                                               |          |                              |                           |                         |                        |           |                        |                        |

| ORF      | AM/OH <i>M. Flagellatus</i> Spectral Count                                                                                           |                      |                   |                 |                 |            | AM/OH <i>M. Flagellatus</i> Protein Intensity |                      |                   |                 |                 |           | Spectral Count         |  | Protein Intensity |  |
|----------|--------------------------------------------------------------------------------------------------------------------------------------|----------------------|-------------------|-----------------|-----------------|------------|-----------------------------------------------|----------------------|-------------------|-----------------|-----------------|-----------|------------------------|--|-------------------|--|
|          | $q$ -value                                                                                                                           | $\log_2$ Methylamine | $\log_2$ Methanol | $\log_2$ Sc Sum | $\log_2$ -Ratio | Regulation | $q$ -value                                    | $\log_2$ Methylamine | $\log_2$ Methanol | $\log_2$ PI Sum | $\log_2$ -Ratio | Consensus | Log <sub>2</sub> Ratio |  |                   |  |
| MFLA0441 |                                                                                                                                      | 0.000                | 0.000             |                 |                 |            |                                               | 0.000                | 0.000             |                 |                 |           |                        |  |                   |  |
|          | <i>ferredoxin [Methylobacillus flagellatus KT]637937337 YP_544552</i>                                                                |                      |                   |                 |                 |            |                                               |                      |                   |                 |                 |           |                        |  |                   |  |
| MFLA0442 |                                                                                                                                      | 0.000                | 0.000             |                 |                 |            |                                               | 0.000                | 0.000             |                 |                 |           |                        |  |                   |  |
|          | <i>hypothetical protein [Methylobacillus flagellatus KT]637937338 YP_544553</i>                                                      |                      |                   |                 |                 |            |                                               |                      |                   |                 |                 |           |                        |  |                   |  |
| MFLA0443 |                                                                                                                                      | 0.000                | 0.000             |                 |                 |            |                                               | 0.000                | 0.000             |                 |                 |           |                        |  |                   |  |
|          | <i>putative PAS/PAC sensor protein [Methylobacillus flagellatus KT]637937339 YP_544554</i>                                           |                      |                   |                 |                 |            |                                               |                      |                   |                 |                 |           |                        |  |                   |  |
| MFLA0444 |                                                                                                                                      | 0.000                | 0.000             | 0.000           |                 | Y          |                                               |                      | 19.739            | 19.739          | Y               |           |                        |  |                   |  |
|          | <i>" signal transduction histidine kinase, nitrate/nitrite-specific, NarQ [Methylobacillus flagellatus KT]637937340 YP_544555 ""</i> |                      |                   |                 |                 |            |                                               |                      |                   |                 |                 |           |                        |  |                   |  |
| MFLA0445 | 3.828                                                                                                                                | 5.044                | 5.560             | -1.199          | Y               |            | 4.61 E-2                                      | 21.327               | 22.316            | 22.904          | -1.089          | Y         |                        |  |                   |  |
|          | <i>" two component transcriptional regulator, LuxR family [Methylobacillus flagellatus KT]637937341 YP_544556 ""</i>                 |                      |                   |                 |                 |            |                                               |                      |                   |                 |                 |           |                        |  |                   |  |
| MFLA0446 | 0.000                                                                                                                                | 0.000                |                   |                 |                 |            |                                               | 0.000                | 0.000             |                 |                 |           |                        |  |                   |  |
|          | <i>amino acid permease-associated region [Methylobacillus flagellatus KT]637937342 YP_544557</i>                                     |                      |                   |                 |                 |            |                                               |                      |                   |                 |                 |           |                        |  |                   |  |
| MFLA0447 |                                                                                                                                      | 0.585                | 0.585             |                 | Y               |            |                                               |                      | 20.521            | 20.521          | Y               |           |                        |  |                   |  |
|          | <i>" two component transcriptional regulator, LuxR family [Methylobacillus flagellatus KT]637937343 YP_544558 ""</i>                 |                      |                   |                 |                 |            |                                               |                      |                   |                 |                 |           |                        |  |                   |  |
| MFLA0448 | 0.000                                                                                                                                | 0.000                |                   |                 |                 |            |                                               | 0.000                | 0.000             |                 |                 |           |                        |  |                   |  |
|          | <i>putative signal transduction histidine kinase [Methylobacillus flagellatus KT]637937344 YP_544559</i>                             |                      |                   |                 |                 |            |                                               |                      |                   |                 |                 |           |                        |  |                   |  |
| MFLA0449 | 0.813                                                                                                                                |                      | 0.813             |                 | Y               |            |                                               | 21.757               |                   | 21.757          | Y               |           |                        |  |                   |  |
|          | <i>Outer membrane autotransporter barrel [Methylobacillus flagellatus KT]637937345 YP_544560</i>                                     |                      |                   |                 |                 |            |                                               |                      |                   |                 |                 |           |                        |  |                   |  |
| MFLA0450 | 0.000                                                                                                                                | 0.000                |                   |                 |                 |            |                                               | 0.000                | 0.000             |                 |                 |           |                        |  |                   |  |
|          | <i>multiple antibiotic resistance (MarC)-related proteins [Methylobacillus flagellatus KT]637937346 YP_544561</i>                    |                      |                   |                 |                 |            |                                               |                      |                   |                 |                 |           |                        |  |                   |  |
| MFLA0451 | 0.000                                                                                                                                | 0.000                |                   |                 |                 |            |                                               | 0.000                | 0.000             |                 |                 |           |                        |  |                   |  |
|          | <i>Alkaline phosphatase [Methylobacillus flagellatus KT]637937347 YP_544562</i>                                                      |                      |                   |                 |                 |            |                                               |                      |                   |                 |                 |           |                        |  |                   |  |
| MFLA0452 | 4.997                                                                                                                                |                      | 4.997             |                 | Y               |            |                                               | 24.588               |                   | 24.588          | Y               |           |                        |  |                   |  |
|          | <i>FAD dependent oxidoreductase [Methylobacillus flagellatus KT]637937348 YP_544563</i>                                              |                      |                   |                 |                 |            |                                               |                      |                   |                 |                 |           |                        |  |                   |  |
| MFLA0453 | 3.621                                                                                                                                |                      | 3.621             |                 | Y               |            |                                               | 24.478               |                   | 24.478          | Y               |           |                        |  |                   |  |
|          | <i>" Sarcosine oxidase, delta subunit, heterotetrameric [Methylobacillus flagellatus KT]637937349 YP_544564 ""</i>                   |                      |                   |                 |                 |            |                                               |                      |                   |                 |                 |           |                        |  |                   |  |
| MFLA0454 | 0                                                                                                                                    | 7.573                | 0.000             | 7.581           | 6.159           | R          |                                               | 1.16 E-1             | 25.826            | 17.406          | 25.830          | 7.030     | R                      |  |                   |  |
|          | <i>Aminomethyltransferase [Methylobacillus flagellatus KT]637937350 YP_544565</i>                                                    |                      |                   |                 |                 |            |                                               |                      |                   |                 |                 |           |                        |  |                   |  |
| MFLA0455 | 4.302                                                                                                                                |                      | 4.302             |                 | Y               |            |                                               | 24.348               |                   | 24.348          | Y               |           |                        |  |                   |  |
|          | <i>hypothetical protein [Methylobacillus flagellatus KT]637937351 YP_544566</i>                                                      |                      |                   |                 |                 |            |                                               |                      |                   |                 |                 |           |                        |  |                   |  |
| MFLA0456 | 0                                                                                                                                    | 7.409                | 2.334             | 7.451           | 4.597           | R          |                                               | 7.7 E-2              | 26.528            | 21.060          | 26.560          | 4.645     | R                      |  |                   |  |
|          | <i>Glutamate--ammonia ligase [Methylobacillus flagellatus KT]637937352 YP_544567</i>                                                 |                      |                   |                 |                 |            |                                               |                      |                   |                 |                 |           |                        |  |                   |  |
| MFLA0457 | 0                                                                                                                                    | 8.410                | 2.000             | 8.427           | 5.132           | R          |                                               | 9.58 E-2             | 26.502            | 19.614          | 26.515          | 5.727     | R                      |  |                   |  |
|          | <i>" glutamine amidotransferase, class-II [Methylobacillus flagellatus KT]637937353 YP_544568 ""</i>                                 |                      |                   |                 |                 |            |                                               |                      |                   |                 |                 |           |                        |  |                   |  |
| MFLA0458 | 6.812                                                                                                                                |                      | 6.812             |                 | Y               |            |                                               | 26.254               |                   | 26.254          | Y               |           |                        |  |                   |  |
|          | <i>" glutamate synthase, alpha subunit-like protein [Methylobacillus flagellatus KT]637937354 YP_544569 ""</i>                       |                      |                   |                 |                 |            |                                               |                      |                   |                 |                 |           |                        |  |                   |  |
| MFLA0459 | 0                                                                                                                                    | 8.581                | 3.754             | 8.631           | 4.429           | R          |                                               | 4.92 E-2             | 27.760            | 22.512          | 27.798          | 4.930     | R                      |  |                   |  |
|          | <i>ferredoxin-dependent glutamate synthase [Methylobacillus flagellatus KT]637937355 YP_544570</i>                                   |                      |                   |                 |                 |            |                                               |                      |                   |                 |                 |           |                        |  |                   |  |
| MFLA0460 | 0.000                                                                                                                                | 0.000                |                   |                 |                 |            |                                               | 0.000                | 0.000             |                 |                 |           |                        |  |                   |  |
|          | <i>hypothetical protein [Methylobacillus flagellatus KT]637937356 YP_544571</i>                                                      |                      |                   |                 |                 |            |                                               |                      |                   |                 |                 |           |                        |  |                   |  |
| MFLA0461 | 0.521                                                                                                                                |                      | 0.521             |                 | Y               |            |                                               | 20.414               |                   | 20.414          | Y               |           |                        |  |                   |  |
|          | <i>response regulator receiver (CheY-like) and ANTAR domain protein [Methylobacillus flagellatus KT]637937357 YP_544572</i>          |                      |                   |                 |                 |            |                                               |                      |                   |                 |                 |           |                        |  |                   |  |
| MFLA0462 | 3.364                                                                                                                                | 2.505                | 3.997             | 0.868           | Y               |            | 2.65 E-1                                      | 21.366               | 21.428            | 22.397          | -0.331          | Y         |                        |  |                   |  |
|          | <i>" chain B, amide receptor of the amidase operon (Amic) [Methylobacillus flagellatus KT]637937358 YP_544573 ""</i>                 |                      |                   |                 |                 |            |                                               |                      |                   |                 |                 |           |                        |  |                   |  |

| ORF             | AM/OH <i>M. Flagellatus</i> Spectral Count                                                                                                     |                             |                           |                         |                        |            | AM/OH <i>M. Flagellatus</i> Protein Intensity |                             |                           |                         |                        |           | Spectral Count         |  | Protein Intensity |  |
|-----------------|------------------------------------------------------------------------------------------------------------------------------------------------|-----------------------------|---------------------------|-------------------------|------------------------|------------|-----------------------------------------------|-----------------------------|---------------------------|-------------------------|------------------------|-----------|------------------------|--|-------------------|--|
|                 | q-value                                                                                                                                        | log <sub>2</sub> Methyamine | log <sub>2</sub> Methanol | log <sub>2</sub> Sc Sum | log <sub>2</sub> Ratio | Regulation | q-value                                       | log <sub>2</sub> Methyamine | log <sub>2</sub> Methanol | log <sub>2</sub> PI Sum | log <sub>2</sub> Ratio | Consensus | Log <sub>2</sub> Ratio |  |                   |  |
| <b>MFLA0463</b> |                                                                                                                                                |                             | 0.000                     | 0.000                   |                        | Y ●● Y     |                                               |                             | 18.517                    | 18.517                  | Y ●                    |           |                        |  |                   |  |
|                 | <i>Nitrilase/cyanide hydratase and apolipoprotein N-acyltransferase [Methylobacillus flagellatus KT]637937359 YP_544574</i>                    |                             |                           |                         |                        |            |                                               |                             |                           |                         |                        |           |                        |  |                   |  |
| <b>MFLA0464</b> |                                                                                                                                                | 0.000                       | 0.000                     |                         |                        | ●●         |                                               | 0.000                       | 0.000                     |                         |                        | ●         |                        |  |                   |  |
|                 | <i>hypothetical protein [Methylobacillus flagellatus KT]637937360 YP_544575</i>                                                                |                             |                           |                         |                        |            |                                               |                             |                           |                         |                        |           |                        |  |                   |  |
| <b>MFLA0465</b> | 3.945                                                                                                                                          | 3.000                       | 4.549                     | -0.103                  | Y ●● Y                 |            | 9.14 E-2                                      | 21.906                      | 21.701                    | 22.808                  | -0.868                 | Y ●       |                        |  |                   |  |
|                 | <i>hypothetical protein [Methylobacillus flagellatus KT]637937361 YP_544576</i>                                                                |                             |                           |                         |                        |            |                                               |                             |                           |                         |                        |           |                        |  |                   |  |
| <b>MFLA0466</b> |                                                                                                                                                | 0.000                       | 0.000                     |                         |                        | ●●         |                                               | 0.000                       | 0.000                     |                         |                        | ●         |                        |  |                   |  |
|                 | <i>hypothetical protein [Methylobacillus flagellatus KT]637937363 YP_544577</i>                                                                |                             |                           |                         |                        |            |                                               |                             |                           |                         |                        |           |                        |  |                   |  |
| <b>MFLA0467</b> | 3.868                                                                                                                                          | 2.879                       | 4.456                     | 1.476                   | Y ●● Y                 |            | 1.15 E-1                                      | 21.163                      | 21.715                    | 22.466                  | -0.873                 | Y ●       |                        |  |                   |  |
|                 | <i>" bis(5'nucleosyl)-tetraphosphatase, ApaH [Methylobacillus flagellatus KT]637937364 YP_544578 ""</i>                                        |                             |                           |                         |                        |            |                                               |                             |                           |                         |                        |           |                        |  |                   |  |
| <b>MFLA0468</b> |                                                                                                                                                | 0.000                       | 0.000                     |                         |                        | ●●         |                                               | 0.000                       | 0.000                     |                         |                        | ●         |                        |  |                   |  |
|                 | <i>phospholipid/glycerol acyltransferase [Methylobacillus flagellatus KT]637937365 YP_544579</i>                                               |                             |                           |                         |                        |            |                                               |                             |                           |                         |                        |           |                        |  |                   |  |
| <b>MFLA0469</b> |                                                                                                                                                | 0.000                       | 0.000                     |                         |                        | ●●         |                                               | 0.000                       | 0.000                     |                         |                        | ●         |                        |  |                   |  |
|                 | <i>" conserved hypothetical protein, predicted autoinducer synthesis protein family [Methylobacillus flagellatus KT]637937366 YP_544580 ""</i> |                             |                           |                         |                        |            |                                               |                             |                           |                         |                        |           |                        |  |                   |  |
| <b>MFLA0470</b> | 0                                                                                                                                              | 7.406                       | 6.083                     | 7.891                   | 1.215                  | R ●● R     | 9.49 E-3                                      | 26.449                      | 24.629                    | 26.809                  | 1.811                  | R ●       |                        |  |                   |  |
|                 | <i>17 kDa surface antigen [Methylobacillus flagellatus KT]637937367 YP_544581</i>                                                              |                             |                           |                         |                        |            |                                               |                             |                           |                         |                        |           |                        |  |                   |  |
| <b>MFLA0471</b> | 2 E-2                                                                                                                                          | 5.589                       | 5.176                     | 6.397                   | 0.339                  | Y ●● Y     | 4.54 E-2                                      | 24.752                      | 25.482                    | 26.163                  | -0.817                 | Y ●       |                        |  |                   |  |
|                 | <i>PfkB [Methylobacillus flagellatus KT]637937368 YP_544582</i>                                                                                |                             |                           |                         |                        |            |                                               |                             |                           |                         |                        |           |                        |  |                   |  |
| <b>MFLA0472</b> | 4.41 E-9                                                                                                                                       | 4.444                       | 6.028                     | 6.444                   | -1.781                 | G ●● G     | 4.46 E-3                                      | 22.615                      | 24.994                    | 25.247                  | -2.424                 | G ●       |                        |  |                   |  |
|                 | <i>" transcriptional regulator, TetR family [Methylobacillus flagellatus KT]637937369 YP_544583 ""</i>                                         |                             |                           |                         |                        |            |                                               |                             |                           |                         |                        |           |                        |  |                   |  |
| <b>MFLA0473</b> |                                                                                                                                                | 0.000                       | 0.000                     |                         |                        | ●●         |                                               | 0.000                       | 0.000                     |                         |                        | ●         |                        |  |                   |  |
|                 | <i>hypothetical protein [Methylobacillus flagellatus KT]637937370 YP_544584</i>                                                                |                             |                           |                         |                        |            |                                               |                             |                           |                         |                        |           |                        |  |                   |  |
| <b>MFLA0474</b> |                                                                                                                                                | 0.000                       | 0.000                     |                         |                        | ●●         |                                               | 0.000                       | 0.000                     |                         |                        | ●         |                        |  |                   |  |
|                 | <i>conserved hypothetical protein 701 [Methylobacillus flagellatus KT]637937371 YP_544585</i>                                                  |                             |                           |                         |                        |            |                                               |                             |                           |                         |                        |           |                        |  |                   |  |
| <b>MFLA0475</b> | 4.222                                                                                                                                          | 4.581                       | 5.413                     | -0.375                  | Y ●● Y                 |            | 1.46 E-1                                      | 23.093                      | 23.753                    | 24.461                  | -0.889                 | Y ●       |                        |  |                   |  |
|                 | <i>alkyl hydroperoxide reductase/ Thiol specific antioxidant/ Mal allergen [Methylobacillus flagellatus KT]637937372 YP_544586</i>             |                             |                           |                         |                        |            |                                               |                             |                           |                         |                        |           |                        |  |                   |  |
| <b>MFLA0476</b> | 3.8 E-4                                                                                                                                        | 6.684                       | 6.065                     | 7.408                   | 0.636                  | R ●● Y     | 8.15 E-2                                      | 25.116                      | 24.740                    | 25.940                  | 0.414                  | R ●       |                        |  |                   |  |
|                 | <i>FAD linked oxidase-like protein [Methylobacillus flagellatus KT]637937373 YP_544587</i>                                                     |                             |                           |                         |                        |            |                                               |                             |                           |                         |                        |           |                        |  |                   |  |
| <b>MFLA0477</b> |                                                                                                                                                | 0.000                       | 0.000                     |                         |                        | ●●         |                                               | 0.000                       | 0.000                     |                         |                        | ●         |                        |  |                   |  |
|                 | <i>protein of unknown function DUF1568 [Methylobacillus flagellatus KT]637937374 YP_544588</i>                                                 |                             |                           |                         |                        |            |                                               |                             |                           |                         |                        |           |                        |  |                   |  |
| <b>MFLA0478</b> |                                                                                                                                                | 0.000                       | 0.000                     |                         |                        | ●●         |                                               | 0.000                       | 0.000                     |                         |                        | ●         |                        |  |                   |  |
|                 | <i>putative transmembrane protein [Methylobacillus flagellatus KT]637937375 YP_544589</i>                                                      |                             |                           |                         |                        |            |                                               |                             |                           |                         |                        |           |                        |  |                   |  |
| <b>MFLA0479</b> |                                                                                                                                                | 0.000                       | 0.000                     |                         |                        | ●●         |                                               | 0.000                       | 0.000                     |                         |                        | ●         |                        |  |                   |  |
|                 | <i>putative transmembrane protein [Methylobacillus flagellatus KT]637937376 YP_544590</i>                                                      |                             |                           |                         |                        |            |                                               |                             |                           |                         |                        |           |                        |  |                   |  |
| <b>MFLA0480</b> |                                                                                                                                                | 0.000                       | 0.000                     |                         |                        | ●●         |                                               | 0.000                       | 0.000                     |                         |                        | ●         |                        |  |                   |  |
|                 | <i>putative transmembrane protein [Methylobacillus flagellatus KT]637937377 YP_544591</i>                                                      |                             |                           |                         |                        |            |                                               |                             |                           |                         |                        |           |                        |  |                   |  |
| <b>MFLA0481</b> |                                                                                                                                                | 0.000                       | 0.000                     |                         |                        | ●●         |                                               | 0.000                       | 0.000                     |                         |                        | ●         |                        |  |                   |  |
|                 | <i>hypothetical protein [Methylobacillus flagellatus KT]637937378 YP_544592</i>                                                                |                             |                           |                         |                        |            |                                               |                             |                           |                         |                        |           |                        |  |                   |  |
| <b>MFLA0482</b> |                                                                                                                                                |                             | 0.346                     | 0.346                   |                        | Y ●● Y     |                                               |                             | 21.578                    | 21.578                  |                        | Y ●       |                        |  |                   |  |
|                 | <i>putative transmembrane protein [Methylobacillus flagellatus KT]637937379 YP_544593</i>                                                      |                             |                           |                         |                        |            |                                               |                             |                           |                         |                        |           |                        |  |                   |  |
| <b>MFLA0483</b> |                                                                                                                                                | 0.000                       | 0.000                     |                         |                        | ●●         |                                               | 0.000                       | 0.000                     |                         |                        | ●         |                        |  |                   |  |
|                 | <i>Adhesin HecA 20-residue repeat x2 [Methylobacillus flagellatus KT]637937380 YP_544594</i>                                                   |                             |                           |                         |                        |            |                                               |                             |                           |                         |                        |           |                        |  |                   |  |
| <b>MFLA0484</b> |                                                                                                                                                | 0.000                       | 0.000                     |                         |                        | ●●         |                                               | 0.000                       | 0.000                     |                         |                        | ●         |                        |  |                   |  |
|                 | <i>Hemolysin activator HlyB [Methylobacillus flagellatus KT]637937381 YP_544595</i>                                                            |                             |                           |                         |                        |            |                                               |                             |                           |                         |                        |           |                        |  |                   |  |

| ORF             | AM/OH <i>M. Flagellatus</i> Spectral Count                                                                                   |                      |                   |                 |                |            | AM/OH <i>M. Flagellatus</i> Protein Intensity |                      |                   |                 |                |           | Spectral Count         |  | Protein Intensity |  |
|-----------------|------------------------------------------------------------------------------------------------------------------------------|----------------------|-------------------|-----------------|----------------|------------|-----------------------------------------------|----------------------|-------------------|-----------------|----------------|-----------|------------------------|--|-------------------|--|
|                 | $q$ -value                                                                                                                   | $\log_2$ Methylamine | $\log_2$ Methanol | $\log_2$ Sc Sum | $\log_2$ Ratio | Regulation | $q$ -value                                    | $\log_2$ Methylamine | $\log_2$ Methanol | $\log_2$ PI Sum | $\log_2$ Ratio | Consensus | Log <sub>2</sub> Ratio |  |                   |  |
| <b>MFLA0485</b> |                                                                                                                              | 0.000                | 0.000             |                 |                |            |                                               | 0.000                | 0.000             |                 |                |           |                        |  |                   |  |
|                 | <i>protein of unknown function UPF0060 [Methylobacillus flagellatus KT]637937382 YP_544596</i>                               |                      |                   |                 |                |            |                                               |                      |                   |                 |                |           |                        |  |                   |  |
| <b>MFLA0486</b> |                                                                                                                              | 1.813                |                   | 1.813           |                | Y ● ● Y    |                                               | 18.017               |                   | 18.017          |                | Y ●       |                        |  |                   |  |
|                 | <i>" Amylo-alpha-1,6-glucosidase [Methylobacillus flagellatus KT]637937383 YP_544597 ""</i>                                  |                      |                   |                 |                |            |                                               |                      |                   |                 |                |           |                        |  |                   |  |
| <b>MFLA0487</b> |                                                                                                                              | 0.000                | 0.000             |                 |                |            |                                               | 0.000                | 0.000             |                 |                |           |                        |  |                   |  |
|                 | <i>" glycosyl transferase, group 1 [Methylobacillus flagellatus KT]637937384 YP_544598 ""</i>                                |                      |                   |                 |                |            |                                               |                      |                   |                 |                |           |                        |  |                   |  |
| <b>MFLA0488</b> |                                                                                                                              | 4.179                | 3.719             | 4.967           | 0.712          | Y ● ● Y    | 1.3 E-1                                       | 22.718               | 22.160            | 23.466          | 0.532          | Y ●       |                        |  |                   |  |
|                 | <i>multi-sensor signal transduction histidine kinase [Methylobacillus flagellatus KT]637937385 YP_544599</i>                 |                      |                   |                 |                |            |                                               |                      |                   |                 |                |           |                        |  |                   |  |
| <b>MFLA0489</b> |                                                                                                                              | 2.025                |                   | 2.025           |                | Y ● ● Y    |                                               | 23.412               |                   | 23.412          |                | Y ●       |                        |  |                   |  |
|                 | <i>" two component transcriptional regulator, winged helix family [Methylobacillus flagellatus KT]637937386 YP_544600 ""</i> |                      |                   |                 |                |            |                                               |                      |                   |                 |                |           |                        |  |                   |  |
| <b>MFLA0490</b> |                                                                                                                              | 2.106                |                   | 2.106           |                | Y ● ● Y    |                                               | 20.440               |                   | 20.440          |                | Y ●       |                        |  |                   |  |
|                 | <i>major facilitator superfamily MFS_1 [Methylobacillus flagellatus KT]637937387 YP_544601</i>                               |                      |                   |                 |                |            |                                               |                      |                   |                 |                |           |                        |  |                   |  |
| <b>MFLA0491</b> |                                                                                                                              | 0.521                |                   | 0.521           |                | Y ● ● Y    |                                               | 19.342               |                   | 19.342          |                | Y ●       |                        |  |                   |  |
|                 | <i>DNA-3-methyladenine glycosylase I [Methylobacillus flagellatus KT]637937388 YP_544602</i>                                 |                      |                   |                 |                |            |                                               |                      |                   |                 |                |           |                        |  |                   |  |
| <b>MFLA0492</b> | 1.25 E-12                                                                                                                    | 6.380                | 7.409             | 7.984           | -1.031         | G ● ● Y    | 1.29 E-2                                      | 25.393               | 26.307            | 26.921          | -0.908         | G ●       |                        |  |                   |  |
|                 | <i>Riboflavin synthase [Methylobacillus flagellatus KT]637937389 YP_544603</i>                                               |                      |                   |                 |                |            |                                               |                      |                   |                 |                |           |                        |  |                   |  |
| <b>MFLA0493</b> |                                                                                                                              | 2.521                | 4.802             | 5.072           | -1.267         | Y ● ● Y    | 3.28 E-2                                      | 22.409               | 24.179            | 24.550          | -0.769         | Y ●       |                        |  |                   |  |
|                 | <i>NusB antitermination factor [Methylobacillus flagellatus KT]637937390 YP_544604</i>                                       |                      |                   |                 |                |            |                                               |                      |                   |                 |                |           |                        |  |                   |  |
| <b>MFLA0494</b> |                                                                                                                              | 0.000                | 0.000             |                 |                |            |                                               | 0.000                | 0.000             |                 |                |           |                        |  |                   |  |
|                 | <i>FHA domain containing protein [Methylobacillus flagellatus KT]637937391 YP_544605</i>                                     |                      |                   |                 |                |            |                                               |                      |                   |                 |                |           |                        |  |                   |  |
| <b>MFLA0495</b> |                                                                                                                              | 3.147                | 2.897             | 4.027           | 0.251          | Y ● ● Y    | 1.63 E-1                                      | 22.001               | 21.507            | 22.775          | 0.550          | Y ●       |                        |  |                   |  |
|                 | <i>" UDP-2,3-diacetylglucosamine hydrolase [Methylobacillus flagellatus KT]637937392 YP_544606 ""</i>                        |                      |                   |                 |                |            |                                               |                      |                   |                 |                |           |                        |  |                   |  |
| <b>MFLA0496</b> | 4.28 E-5                                                                                                                     | 7.906                | 8.304             | 9.118           | -0.397         | Y ● ● G    | 9.69 E-3                                      | 28.377               | 29.265            | 29.889          | -0.884         | G ●       |                        |  |                   |  |
|                 | <i>Peptidylprolyl isomerase [Methylobacillus flagellatus KT]637937393 YP_544607</i>                                          |                      |                   |                 |                |            |                                               |                      |                   |                 |                |           |                        |  |                   |  |
| <b>MFLA0497</b> | 5.03 E-4                                                                                                                     | 5.866                | 5.132             | 6.545           | 0.789          | R ● ● Y    | 9.74 E-2                                      | 26.517               | 25.624            | 27.138          | 0.951          | R ●       |                        |  |                   |  |
|                 | <i>Peptidylprolyl isomerase [Methylobacillus flagellatus KT]637937394 YP_544608</i>                                          |                      |                   |                 |                |            |                                               |                      |                   |                 |                |           |                        |  |                   |  |
| <b>MFLA0498</b> |                                                                                                                              | 3.038                | 1.000             | 3.352           | 0.752          | Y ● ● Y    | 2.16 E-1                                      | 20.954               | 19.459            | 21.392          | -0.141         | Y ●       |                        |  |                   |  |
|                 | <i>ErkK/YbiS/YcfS/YnhG [Methylobacillus flagellatus KT]637937395 YP_544609</i>                                               |                      |                   |                 |                |            |                                               |                      |                   |                 |                |           |                        |  |                   |  |
| <b>MFLA0499</b> |                                                                                                                              | 7.350                | 6.881             | 8.134           | 0.343          | Y ● ● Y    | 2.95 E-2                                      | 25.556               | 26.267            | 26.955          | -0.694         | Y ●       |                        |  |                   |  |
|                 | <i>Tetratricopeptide TPR_2 [Methylobacillus flagellatus KT]637937396 YP_544610</i>                                           |                      |                   |                 |                |            |                                               |                      |                   |                 |                |           |                        |  |                   |  |
| <b>MFLA0500</b> |                                                                                                                              | 5.561                | 5.955             | 6.771           | -0.455         | Y ● ● Y    | 1.14 E-1                                      | 24.605               | 25.229            | 25.951          | -1.050         | Y ●       |                        |  |                   |  |
|                 | <i>cysteinyI-tRNA synthetase [Methylobacillus flagellatus KT]637937397 YP_544611</i>                                         |                      |                   |                 |                |            |                                               |                      |                   |                 |                |           |                        |  |                   |  |
| <b>MFLA0501</b> |                                                                                                                              | 0.000                | 0.000             |                 |                |            |                                               | 0.000                | 0.000             |                 |                |           |                        |  |                   |  |
|                 | <i>hypothetical protein [Methylobacillus flagellatus KT]637937398 YP_544612</i>                                              |                      |                   |                 |                |            |                                               |                      |                   |                 |                |           |                        |  |                   |  |
| <b>MFLA0502</b> |                                                                                                                              | 0.000                | 0.000             |                 |                |            |                                               | 0.000                | 0.000             |                 |                |           |                        |  |                   |  |
|                 | <i>outer membrane efflux protein [Methylobacillus flagellatus KT]637937399 YP_544613</i>                                     |                      |                   |                 |                |            |                                               |                      |                   |                 |                |           |                        |  |                   |  |
| <b>MFLA0503</b> |                                                                                                                              | 0.000                | 0.000             |                 |                |            |                                               | 0.000                | 0.000             |                 |                |           |                        |  |                   |  |
|                 | <i>secretion protein HlyD [Methylobacillus flagellatus KT]637937400 YP_544614</i>                                            |                      |                   |                 |                |            |                                               |                      |                   |                 |                |           |                        |  |                   |  |
| <b>MFLA0504</b> |                                                                                                                              | 2.996                | 1.915             | 3.555           | 1.155          | Y ● ● Y    | 1.89 E-2                                      | 19.946               | 20.448            | 21.219          | -0.507         | Y ●       |                        |  |                   |  |
|                 | <i>Heavy metal efflux pump Czca [Methylobacillus flagellatus KT]637937401 YP_544615</i>                                      |                      |                   |                 |                |            |                                               |                      |                   |                 |                |           |                        |  |                   |  |
| <b>MFLA0505</b> |                                                                                                                              |                      | 1.668             | 1.668           |                | Y ● ● Y    |                                               | 19.520               | 19.520            |                 |                | Y ●       |                        |  |                   |  |
|                 | <i>" nitrogen regulatory protein P-II (GlnB, GlnK) [Methylobacillus flagellatus KT]637937402 YP_544616 ""</i>                |                      |                   |                 |                |            |                                               |                      |                   |                 |                |           |                        |  |                   |  |
| <b>MFLA0506</b> | 1.27 E-2                                                                                                                     | 5.822                | 6.288             | 7.074           | -0.454         | Y ● ● Y    | 2.59 E-2                                      | 24.336               | 24.897            | 25.644          | -0.572         | Y ●       |                        |  |                   |  |
|                 | <i>Dihydroorotate oxidase [Methylobacillus flagellatus KT]637937403 YP_544617</i>                                            |                      |                   |                 |                |            |                                               |                      |                   |                 |                |           |                        |  |                   |  |



| ORF             | AM/OH <i>M. Flagellatus</i> Spectral Count                                                                                                        |                              |                           |                         |                        | AM/OH <i>M. Flagellatus</i> Protein Intensity |          |                              |                           |                         | Spectral Count         |           | Protein Intensity |  | Log <sub>2</sub> Ratio |
|-----------------|---------------------------------------------------------------------------------------------------------------------------------------------------|------------------------------|---------------------------|-------------------------|------------------------|-----------------------------------------------|----------|------------------------------|---------------------------|-------------------------|------------------------|-----------|-------------------|--|------------------------|
|                 | q-value                                                                                                                                           | log <sub>2</sub> Methylamine | log <sub>2</sub> Methanol | log <sub>2</sub> Sc Sum | log <sub>2</sub> Ratio | Regulation                                    | q-value  | log <sub>2</sub> Methylamine | log <sub>2</sub> Methanol | log <sub>2</sub> PI Sum | log <sub>2</sub> Ratio | Consensus |                   |  |                        |
| <b>MFLA0507</b> |                                                                                                                                                   | 1.843                        | 3.162                     | 3.648                   | -0.319                 | Y ●●● Y                                       | 3.47 E-2 | 19.090                       | 20.720                    | 21.124                  | -0.629                 | Y ●●      |                   |  |                        |
|                 | <i>glutathione S-transferase-like protein [Methylobacillus flagellatus KT]637937404 YP_544618</i>                                                 |                              |                           |                         |                        |                                               |          |                              |                           |                         |                        |           |                   |  |                        |
| <b>MFLA0508</b> |                                                                                                                                                   | 7.083                        | 6.860                     | 7.976                   | 0.185                  | Y ●●● Y                                       | 2.79 E-2 | 26.462                       | 27.213                    | 27.886                  | -0.750                 | Y ●●      |                   |  |                        |
|                 | <i>ATPase AAA-2 [Methylobacillus flagellatus KT]637937405 YP_544619</i>                                                                           |                              |                           |                         |                        |                                               |          |                              |                           |                         |                        |           |                   |  |                        |
| <b>MFLA0509</b> |                                                                                                                                                   | 4.581                        | 4.407                     | 5.497                   | 0.339                  | Y ●●● Y                                       | 2.76 E-2 | 20.884                       | 22.489                    | 22.899                  | -1.757                 | Y ●●      |                   |  |                        |
|                 | <i>ATP-dependent Clp protease adaptor protein ClpS [Methylobacillus flagellatus KT]637937406 YP_544620</i>                                        |                              |                           |                         |                        |                                               |          |                              |                           |                         |                        |           |                   |  |                        |
| <b>MFLA0510</b> |                                                                                                                                                   | 2.106                        | 2.983                     | 3.610                   | 0.347                  | Y ●●● Y                                       | 1.05 E-1 | 21.069                       | 22.757                    | 23.147                  | -0.656                 | Y ●●      |                   |  |                        |
|                 | <i>protein of unknown function DUF21 [Methylobacillus flagellatus KT]637937407 YP_544621</i>                                                      |                              |                           |                         |                        |                                               |          |                              |                           |                         |                        |           |                   |  |                        |
| <b>MFLA0511</b> | 0                                                                                                                                                 | 5.450                        | 7.199                     | 7.575                   | -1.674                 | G ●●● Y                                       | 2.93 E-2 | 25.757                       | 27.050                    | 27.544                  | -1.609                 | G ●●      |                   |  |                        |
|                 | <i>SecF protein [Methylobacillus flagellatus KT]637937408 YP_544622</i>                                                                           |                              |                           |                         |                        |                                               |          |                              |                           |                         |                        |           |                   |  |                        |
| <b>MFLA0512</b> | 2.38 E-9                                                                                                                                          | 8.684                        | 8.171                     | 9.451                   | 0.511                  | R ●●● Y                                       | 4.29 E-2 | 27.423                       | 27.626                    | 28.528                  | -0.204                 | Y ●●      |                   |  |                        |
|                 | <i>protein-export membrane protein SecD [Methylobacillus flagellatus KT]637937409 YP_544623</i>                                                   |                              |                           |                         |                        |                                               |          |                              |                           |                         |                        |           |                   |  |                        |
| <b>MFLA0513</b> | 0                                                                                                                                                 | 8.562                        | 9.192                     | 9.911                   | -0.629                 | G ●●● Y                                       | 1.6 E-2  | 26.807                       | 27.873                    | 28.436                  | -1.135                 | G ●●      |                   |  |                        |
|                 | <i>" preprotein translocase, YajC subunit [Methylobacillus flagellatus KT]637937410 YP_544624 ""</i>                                              |                              |                           |                         |                        |                                               |          |                              |                           |                         |                        |           |                   |  |                        |
| <b>MFLA0514</b> |                                                                                                                                                   | 5.286                        | 4.059                     | 5.799                   | 1.258                  | Y ●●● Y                                       | 4.22 E-2 | 22.869                       | 22.512                    | 23.702                  | 0.353                  | Y ●●      |                   |  |                        |
|                 | <i>queuine tRNA-ribosyltransferase [Methylobacillus flagellatus KT]637937411 YP_544625</i>                                                        |                              |                           |                         |                        |                                               |          |                              |                           |                         |                        |           |                   |  |                        |
| <b>MFLA0515</b> | 0.000                                                                                                                                             | 0.000                        |                           |                         |                        | ●●●                                           |          | 0.000                        | 0.000                     |                         |                        | ●●        |                   |  |                        |
|                 | <i>CDP-diacylglycerol--serine O-phosphatidyltransferase [Methylobacillus flagellatus KT]637937412 YP_544626</i>                                   |                              |                           |                         |                        |                                               |          |                              |                           |                         |                        |           |                   |  |                        |
| <b>MFLA0516</b> |                                                                                                                                                   | 4.253                        | 3.573                     | 4.952                   | 0.786                  | Y ●●● Y                                       | 1.12 E-1 | 21.571                       | 20.766                    | 22.224                  | 0.672                  | Y ●●      |                   |  |                        |
|                 | <i>hypothetical protein [Methylobacillus flagellatus KT]637937413 YP_544627</i>                                                                   |                              |                           |                         |                        |                                               |          |                              |                           |                         |                        |           |                   |  |                        |
| <b>MFLA0517</b> | 3.62 E-2                                                                                                                                          | 6.673                        | 6.557                     | 7.616                   | 0.114                  | Y ●●● Y                                       | 2.59 E-2 | 25.060                       | 25.441                    | 26.263                  | -0.387                 | Y ●●      |                   |  |                        |
|                 | <i>2-isopropylmalate synthase [Methylobacillus flagellatus KT]637937414 YP_544628</i>                                                             |                              |                           |                         |                        |                                               |          |                              |                           |                         |                        |           |                   |  |                        |
| <b>MFLA0518</b> |                                                                                                                                                   | 3.812                        |                           | 3.812                   |                        | Y ●●● Y                                       |          | 24.026                       |                           | 24.026                  |                        | Y ●●      |                   |  |                        |
|                 | <i>GreA/GreB family elongation factor [Methylobacillus flagellatus KT]637937415 YP_544629</i>                                                     |                              |                           |                         |                        |                                               |          |                              |                           |                         |                        |           |                   |  |                        |
| <b>MFLA0519</b> | 0.000                                                                                                                                             | 0.000                        |                           |                         |                        | ●●●                                           |          | 0.000                        | 0.000                     |                         |                        | ●●        |                   |  |                        |
|                 | <i>putative integral membrane protein [Methylobacillus flagellatus KT]637937416 YP_544630</i>                                                     |                              |                           |                         |                        |                                               |          |                              |                           |                         |                        |           |                   |  |                        |
| <b>MFLA0520</b> |                                                                                                                                                   | 4.439                        | 4.344                     | 5.392                   | 0.072                  | Y ●●● Y                                       | 1.02 E-1 | 23.298                       | 23.019                    | 24.165                  | 0.257                  | Y ●●      |                   |  |                        |
|                 | <i>" HAD-superfamily subfamily 1B, PSPase-like protein [Methylobacillus flagellatus KT]637937417 YP_544631 ""</i>                                 |                              |                           |                         |                        |                                               |          |                              |                           |                         |                        |           |                   |  |                        |
| <b>MFLA0521</b> | 0.000                                                                                                                                             | 0.000                        |                           |                         |                        | ●●●                                           |          | 0.000                        | 0.000                     |                         |                        | ●●        |                   |  |                        |
|                 | <i>cytochrome c assembly protein [Methylobacillus flagellatus KT]637937418 YP_544632</i>                                                          |                              |                           |                         |                        |                                               |          |                              |                           |                         |                        |           |                   |  |                        |
| <b>MFLA0522</b> | 5.77 E-5                                                                                                                                          | 7.022                        | 7.514                     | 8.289                   | -0.485                 | Y ●●● Y                                       | 8.26 E-2 | 26.386                       | 26.826                    | 27.623                  | -0.475                 | Y ●●      |                   |  |                        |
|                 | <i>signal recognition particle protein [Methylobacillus flagellatus KT]637937419 YP_544633</i>                                                    |                              |                           |                         |                        |                                               |          |                              |                           |                         |                        |           |                   |  |                        |
| <b>MFLA0523</b> | 0.000                                                                                                                                             | 0.000                        |                           |                         |                        | ●●●                                           |          | 0.000                        | 0.000                     |                         |                        | ●●        |                   |  |                        |
|                 | <i>Drug resistance transporter EmrB/QacA subfamily [Methylobacillus flagellatus KT]637937421 YP_544634</i>                                        |                              |                           |                         |                        |                                               |          |                              |                           |                         |                        |           |                   |  |                        |
| <b>MFLA0524</b> | 0.000                                                                                                                                             | 0.000                        |                           |                         |                        | ●●●                                           |          | 0.000                        | 0.000                     |                         |                        | ●●        |                   |  |                        |
|                 | <i>GCN5-related N-acetyltransferase [Methylobacillus flagellatus KT]637937422 YP_544635</i>                                                       |                              |                           |                         |                        |                                               |          |                              |                           |                         |                        |           |                   |  |                        |
| <b>MFLA0525</b> | 1.45 E-4                                                                                                                                          | 6.071                        | 6.566                     | 7.340                   | -0.595                 | G ●●● Y                                       | 2.05 E-1 | 26.155                       | 25.972                    | 27.066                  | 0.097                  | Y ●●      |                   |  |                        |
|                 | <i>phospho-2-dehydro-3-deoxyheptonate aldolase [Methylobacillus flagellatus KT]637937423 YP_544636</i>                                            |                              |                           |                         |                        |                                               |          |                              |                           |                         |                        |           |                   |  |                        |
| <b>MFLA0526</b> | 0.000                                                                                                                                             | 0.000                        |                           |                         |                        | ●●●                                           |          | 0.000                        | 0.000                     |                         |                        | ●●        |                   |  |                        |
|                 | <i>hypothetical protein [Methylobacillus flagellatus KT]637937424 YP_544637</i>                                                                   |                              |                           |                         |                        |                                               |          |                              |                           |                         |                        |           |                   |  |                        |
| <b>MFLA0527</b> |                                                                                                                                                   | 2.328                        |                           | 2.328                   |                        | Y ●●● Y                                       |          | 19.344                       |                           | 19.344                  |                        | Y ●●      |                   |  |                        |
|                 | <i>hypothetical protein [Methylobacillus flagellatus KT]637937425 YP_544638</i>                                                                   |                              |                           |                         |                        |                                               |          |                              |                           |                         |                        |           |                   |  |                        |
| <b>MFLA0528</b> |                                                                                                                                                   | 2.135                        | 0.000                     | 2.431                   | 2.135                  | Y ●●● Y                                       |          | 19.274                       | 19.134                    | 20.206                  | 0.139                  | Y ●●      |                   |  |                        |
|                 | <i>diguanylate cyclase/phosphodiesterase (GGDEF &amp; EAL domains) with PAS/PAC sensor(s) [Methylobacillus flagellatus KT]637937426 YP_544639</i> |                              |                           |                         |                        |                                               |          |                              |                           |                         |                        |           |                   |  |                        |

| ORF             | AM/OH <i>M. Flagellatus</i> Spectral Count                                                                           |                              |                           |                         |                        | AM/OH <i>M. Flagellatus</i> Protein Intensity |          |                              |                           |                         | Spectral Count         |           | Protein Intensity      |  |  |
|-----------------|----------------------------------------------------------------------------------------------------------------------|------------------------------|---------------------------|-------------------------|------------------------|-----------------------------------------------|----------|------------------------------|---------------------------|-------------------------|------------------------|-----------|------------------------|--|--|
|                 | q-value                                                                                                              | log <sub>2</sub> Methylamine | log <sub>2</sub> Methanol | log <sub>2</sub> Sc Sum | log <sub>2</sub> Ratio | Regulation                                    | q-value  | log <sub>2</sub> Methylamine | log <sub>2</sub> Methanol | log <sub>2</sub> PI Sum | log <sub>2</sub> Ratio | Consensus | Log <sub>2</sub> Ratio |  |  |
| <b>MFLA0529</b> |                                                                                                                      | 3.184                        | 1.915                     | 3.685                   | 1.210                  | Y ●● Y                                        | 1.23 E-1 | 21.417                       | 22.439                    | 23.017                  | -0.530                 | Y ●       |                        |  |  |
|                 | <i>diguanylate cyclase (GGDEF domain) [Methylobacillus flagellatus KT]637937427 YP_544640</i>                        |                              |                           |                         |                        |                                               |          |                              |                           |                         |                        |           |                        |  |  |
| <b>MFLA0530</b> | 9.92 E-2                                                                                                             | 6.540                        | 6.543                     | 7.541                   | -0.015                 | Y ●● Y                                        | 1.65 E-1 | 25.450                       | 25.539                    | 26.495                  | -0.077                 | Y ●       |                        |  |  |
|                 | <i>glucose sorbosone dehydrogenase [Methylobacillus flagellatus KT]637937428 YP_544641</i>                           |                              |                           |                         |                        |                                               |          |                              |                           |                         |                        |           |                        |  |  |
| <b>MFLA0531</b> |                                                                                                                      | 0.000                        | 0.000                     |                         |                        | ■ ■                                           |          | 0.000                        | 0.000                     |                         |                        | ■         |                        |  |  |
|                 | <i>" two component transcriptional regulator, LuxR family [Methylobacillus flagellatus KT]637937429 YP_544642 ""</i> |                              |                           |                         |                        |                                               |          |                              |                           |                         |                        |           |                        |  |  |
| <b>MFLA0532</b> |                                                                                                                      | 1.813                        |                           | 1.813                   |                        | Y ●● Y                                        |          | 23.515                       |                           | 23.515                  |                        | Y ●       |                        |  |  |
|                 | <i>hypothetical protein [Methylobacillus flagellatus KT]637937430 YP_544643</i>                                      |                              |                           |                         |                        |                                               |          |                              |                           |                         |                        |           |                        |  |  |
| <b>MFLA0533</b> |                                                                                                                      | 0.000                        | 0.000                     |                         |                        | ■ ■                                           |          | 0.000                        | 0.000                     |                         |                        | ■         |                        |  |  |
|                 | <i>hypothetical protein [Methylobacillus flagellatus KT]637937431 YP_544644</i>                                      |                              |                           |                         |                        |                                               |          |                              |                           |                         |                        |           |                        |  |  |
| <b>MFLA0534</b> |                                                                                                                      | 0.000                        | 0.000                     |                         |                        | ■ ■                                           |          | 0.000                        | 0.000                     |                         |                        | ■         |                        |  |  |
|                 | <i>hypothetical protein [Methylobacillus flagellatus KT]637937432 YP_544645</i>                                      |                              |                           |                         |                        |                                               |          |                              |                           |                         |                        |           |                        |  |  |
| <b>MFLA0535</b> | 0                                                                                                                    | 11.953                       | 12.675                    | 13.359                  | -0.721                 | G ●● Y                                        | 1.35 E-2 | 32.450                       | 33.535                    | 34.092                  | -1.079                 | G ●       |                        |  |  |
|                 | <i>NHL repeat [Methylobacillus flagellatus KT]637937433 YP_544646</i>                                                |                              |                           |                         |                        |                                               |          |                              |                           |                         |                        |           |                        |  |  |
| <b>MFLA0536</b> |                                                                                                                      | 0.000                        | 0.000                     |                         |                        | ■ ■                                           |          | 0.000                        | 0.000                     |                         |                        | ■         |                        |  |  |
|                 | <i>hypothetical protein [Methylobacillus flagellatus KT]637937434 YP_544647</i>                                      |                              |                           |                         |                        |                                               |          |                              |                           |                         |                        |           |                        |  |  |
| <b>MFLA0537</b> |                                                                                                                      | 4.600                        | 1.000                     | 4.714                   | 2.459                  | Y ●● Y                                        | 1.53 E-1 | 21.871                       | 19.019                    | 22.058                  | 1.120                  | Y ●       |                        |  |  |
|                 | <i>TonB-dependent siderophore receptor [Methylobacillus flagellatus KT]637937435 YP_544648</i>                       |                              |                           |                         |                        |                                               |          |                              |                           |                         |                        |           |                        |  |  |
| <b>MFLA0538</b> |                                                                                                                      | 0.000                        | 0.000                     |                         |                        | ■ ■                                           |          | 0.000                        | 0.000                     |                         |                        | ■         |                        |  |  |
|                 | <i>hypothetical protein [Methylobacillus flagellatus KT]637937436 YP_544649</i>                                      |                              |                           |                         |                        |                                               |          |                              |                           |                         |                        |           |                        |  |  |
| <b>MFLA0539</b> |                                                                                                                      | 0.000                        | 0.000                     |                         |                        | ■ ■                                           |          | 0.000                        | 0.000                     |                         |                        | ■         |                        |  |  |
|                 | <i>translation initiation factor IF-1 [Methylobacillus flagellatus KT]637937437 YP_544650</i>                        |                              |                           |                         |                        |                                               |          |                              |                           |                         |                        |           |                        |  |  |
| <b>MFLA0540</b> |                                                                                                                      | 5.451                        |                           | 5.451                   |                        | Y ●● Y                                        |          | 25.312                       |                           | 25.312                  |                        | Y ●       |                        |  |  |
|                 | <i>" transcriptional regulator, AraC family [Methylobacillus flagellatus KT]637937438 YP_544651 ""</i>               |                              |                           |                         |                        |                                               |          |                              |                           |                         |                        |           |                        |  |  |
| <b>MFLA0541</b> |                                                                                                                      | 2.860                        |                           | 2.860                   |                        | Y ●● Y                                        |          | 21.468                       |                           | 21.468                  |                        | Y ●       |                        |  |  |
|                 | <i>hypothetical protein [Methylobacillus flagellatus KT]637937439 YP_544652</i>                                      |                              |                           |                         |                        |                                               |          |                              |                           |                         |                        |           |                        |  |  |
| <b>MFLA0542</b> |                                                                                                                      | 0.000                        | 0.000                     |                         |                        | ■ ■                                           |          | 0.000                        | 0.000                     |                         |                        | ■         |                        |  |  |
|                 | <i>" twin-arginine translocation protein, TatA/E family [Methylobacillus flagellatus KT]637937440 YP_544653 ""</i>   |                              |                           |                         |                        |                                               |          |                              |                           |                         |                        |           |                        |  |  |
| <b>MFLA0543</b> |                                                                                                                      | 4.206                        |                           | 4.206                   |                        | Y ●● Y                                        |          | 19.123                       |                           | 19.123                  |                        | Y ●       |                        |  |  |
|                 | <i>twin-arginine translocation protein TatB [Methylobacillus flagellatus KT]637937441 YP_544654</i>                  |                              |                           |                         |                        |                                               |          |                              |                           |                         |                        |           |                        |  |  |
| <b>MFLA0544</b> |                                                                                                                      | 0.000                        | 0.000                     |                         |                        | ■ ■                                           |          | 0.000                        | 0.000                     |                         |                        | ■         |                        |  |  |
|                 | <i>Sec-independent protein translocase TatC [Methylobacillus flagellatus KT]637937442 YP_544655</i>                  |                              |                           |                         |                        |                                               |          |                              |                           |                         |                        |           |                        |  |  |
| <b>MFLA0545</b> |                                                                                                                      | 5.182                        |                           | 5.182                   |                        | Y ●● Y                                        |          | 23.776                       |                           | 23.776                  |                        | Y ●       |                        |  |  |
|                 | <i>" transcriptional regulator, AraC family [Methylobacillus flagellatus KT]637937443 YP_544656 ""</i>               |                              |                           |                         |                        |                                               |          |                              |                           |                         |                        |           |                        |  |  |
| <b>MFLA0546</b> |                                                                                                                      | 3.521                        |                           | 3.521                   |                        | Y ●● Y                                        |          | 21.132                       |                           | 21.132                  |                        | Y ●       |                        |  |  |
|                 | <i>hypothetical protein [Methylobacillus flagellatus KT]637937444 YP_544657</i>                                      |                              |                           |                         |                        |                                               |          |                              |                           |                         |                        |           |                        |  |  |
| <b>MFLA0547</b> |                                                                                                                      | 0.000                        | 0.000                     |                         |                        | ■ ■                                           |          | 0.000                        | 0.000                     |                         |                        | ■         |                        |  |  |
|                 | <i>hypothetical protein [Methylobacillus flagellatus KT]637937445 YP_544658</i>                                      |                              |                           |                         |                        |                                               |          |                              |                           |                         |                        |           |                        |  |  |
| <b>MFLA0548</b> | 0                                                                                                                    | 12.586                       | 6.092                     | 12.602                  | 6.529                  | R ●● Y                                        | 1.03 E-2 | 34.229                       | 25.245                    | 34.232                  | 9.035                  | R ●       |                        |  |  |
|                 | <i>Amine dehydrogenase [Methylobacillus flagellatus KT]637937446 YP_544659</i>                                       |                              |                           |                         |                        |                                               |          |                              |                           |                         |                        |           |                        |  |  |
| <b>MFLA0549</b> |                                                                                                                      | 4.691                        |                           | 4.691                   |                        | Y ●● Y                                        |          | 25.047                       |                           | 25.047                  |                        | Y ●       |                        |  |  |
|                 | <i>methylamine utilisation MauE [Methylobacillus flagellatus KT]637937447 YP_544660</i>                              |                              |                           |                         |                        |                                               |          |                              |                           |                         |                        |           |                        |  |  |
| <b>MFLA0550</b> | 0                                                                                                                    | 10.041                       | 2.322                     | 10.047                  | 6.716                  | R ●● Y                                        | 4.59 E-2 | 31.402                       | 22.275                    | 31.405                  | 8.115                  | R ●       |                        |  |  |
|                 | <i>hypothetical protein [Methylobacillus flagellatus KT]637937448 YP_544661</i>                                      |                              |                           |                         |                        |                                               |          |                              |                           |                         |                        |           |                        |  |  |

| ORF             | AM/OH <i>M. Flagellatus</i> Spectral Count                                                                             |                              |                           |                         |                        |            | AM/OH <i>M. Flagellatus</i> Protein Intensity |                              |                           |                         |                        |                        | Consensus | Spectral Count |   | Protein Intensity |  |
|-----------------|------------------------------------------------------------------------------------------------------------------------|------------------------------|---------------------------|-------------------------|------------------------|------------|-----------------------------------------------|------------------------------|---------------------------|-------------------------|------------------------|------------------------|-----------|----------------|---|-------------------|--|
|                 | <i>q</i> -value                                                                                                        | log <sub>2</sub> Methylamine | log <sub>2</sub> Methanol | log <sub>2</sub> Sc Sum | log <sub>2</sub> Ratio | Regulation | <i>q</i> -value                               | log <sub>2</sub> Methylamine | log <sub>2</sub> Methanol | log <sub>2</sub> PI Sum | log <sub>2</sub> Ratio | Log <sub>2</sub> Ratio |           | -7             | 0 | 7                 |  |
| <b>MFLA0551</b> |                                                                                                                        | 7.785                        |                           | 7.785                   |                        | Y ●● Y     |                                               | 28.414                       |                           | 28.414                  |                        | Y ●                    |           |                |   |                   |  |
|                 | <i>Amine dehydrogenase [Methylobacillus flagellatus KT]637937449 YP_544662</i>                                         |                              |                           |                         |                        |            |                                               |                              |                           |                         |                        |                        |           |                |   |                   |  |
| <b>MFLA0552</b> |                                                                                                                        | 7.524                        |                           | 7.524                   |                        | Y ●● Y     |                                               | 27.114                       |                           | 27.114                  |                        | Y ●                    |           |                |   |                   |  |
|                 | <i>Cytochrome-c peroxidase [Methylobacillus flagellatus KT]637937450 YP_544663</i>                                     |                              |                           |                         |                        |            |                                               |                              |                           |                         |                        |                        |           |                |   |                   |  |
| <b>MFLA0553</b> |                                                                                                                        | 0.000                        | 0.000                     |                         |                        | ■ ■        |                                               | 0.000                        |                           | 0.000                   |                        | ■                      |           |                |   |                   |  |
|                 | <i>hypothetical protein [Methylobacillus flagellatus KT]637937451 YP_544664</i>                                        |                              |                           |                         |                        |            |                                               |                              |                           |                         |                        |                        |           |                |   |                   |  |
| <b>MFLA0554</b> |                                                                                                                        | 5.720                        |                           | 5.720                   |                        | Y ●● Y     |                                               | 26.079                       |                           | 26.079                  |                        | Y ●                    |           |                |   |                   |  |
|                 | <i>MauM/NapG family ferredoxin-type protein [Methylobacillus flagellatus KT]637937452 YP_544665</i>                    |                              |                           |                         |                        |            |                                               |                              |                           |                         |                        |                        |           |                |   |                   |  |
| <b>MFLA0555</b> |                                                                                                                        | 3.720                        |                           | 3.720                   |                        | Y ●● Y     |                                               | 22.321                       |                           | 22.321                  |                        | Y ●                    |           |                |   |                   |  |
|                 | <i>" Ferredoxin-type protein, NapH/MauN family [Methylobacillus flagellatus KT]637937453 YP_544666 ""</i>              |                              |                           |                         |                        |            |                                               |                              |                           |                         |                        |                        |           |                |   |                   |  |
| <b>MFLA0556</b> | 0                                                                                                                      | 8.213                        | 2.459                     | 8.239                   | 4.723                  | R ●● Y     | 7.03 E-2                                      | 30.970                       | 21.533                    | 30.972                  | 8.384                  | R ●                    |           |                |   |                   |  |
|                 | <i>blue (type 1) copper domain [Methylobacillus flagellatus KT]637937454 YP_544667</i>                                 |                              |                           |                         |                        |            |                                               |                              |                           |                         |                        |                        |           |                |   |                   |  |
| <b>MFLA0557</b> |                                                                                                                        | 0.000                        | 0.000                     |                         |                        | ■ ■        |                                               | 0.000                        |                           | 0.000                   |                        | ■                      |           |                |   |                   |  |
|                 | <i>" protein of unknown function DUF6, transmembrane [Methylobacillus flagellatus KT]637937455 YP_544668 ""</i>        |                              |                           |                         |                        |            |                                               |                              |                           |                         |                        |                        |           |                |   |                   |  |
| <b>MFLA0558</b> |                                                                                                                        | 3.199                        |                           | 3.199                   |                        | Y ●● Y     |                                               | 20.604                       |                           | 20.604                  |                        | Y ●                    |           |                |   |                   |  |
|                 | <i>" DNA topoisomerase, type I, putative [Methylobacillus flagellatus KT]637937456 YP_544669 ""</i>                    |                              |                           |                         |                        |            |                                               |                              |                           |                         |                        |                        |           |                |   |                   |  |
| <b>MFLA0559</b> | 2.39 E-2                                                                                                               | 5.567                        | 5.273                     | 6.428                   | 0.218                  | Y ●● Y     | 1.08 E-1                                      | 25.022                       | 24.381                    | 25.737                  | 0.532                  | Y ●                    |           |                |   |                   |  |
|                 | <i>heat shock protein Hsp20 [Methylobacillus flagellatus KT]637937457 YP_544670</i>                                    |                              |                           |                         |                        |            |                                               |                              |                           |                         |                        |                        |           |                |   |                   |  |
| <b>MFLA0560</b> |                                                                                                                        | 0.000                        | 0.000                     |                         |                        | ■ ■        |                                               | 0.000                        |                           | 0.000                   |                        | ■                      |           |                |   |                   |  |
|                 | <i>molybdenum cofactor synthesis-like protein [Methylobacillus flagellatus KT]637937458 YP_544671</i>                  |                              |                           |                         |                        |            |                                               |                              |                           |                         |                        |                        |           |                |   |                   |  |
| <b>MFLA0561</b> |                                                                                                                        | 4.254                        | 2.334                     | 4.592                   | 1.736                  | Y ●● Y     | 4.06 E-2                                      | 22.114                       | 21.205                    | 22.730                  | 0.955                  | Y ●                    |           |                |   |                   |  |
|                 | <i>FAD-dependent pyridine nucleotide-disulphide oxidoreductase [Methylobacillus flagellatus KT]637937459 YP_544672</i> |                              |                           |                         |                        |            |                                               |                              |                           |                         |                        |                        |           |                |   |                   |  |
| <b>MFLA0562</b> |                                                                                                                        | 0.000                        | 0.000                     |                         |                        | ■ ■        |                                               | 0.000                        |                           | 0.000                   |                        | ■                      |           |                |   |                   |  |
|                 | <i>" 4Fe-4S ferredoxin, iron-sulfur binding [Methylobacillus flagellatus KT]637937460 YP_544673 ""</i>                 |                              |                           |                         |                        |            |                                               |                              |                           |                         |                        |                        |           |                |   |                   |  |
| <b>MFLA0563</b> |                                                                                                                        | 6.048                        | 0.585                     | 6.081                   | 4.184                  | Y ●● Y     | 7.24 E-2                                      | 25.217                       | 19.493                    | 25.245                  | 4.669                  | Y ●                    |           |                |   |                   |  |
|                 | <i>molybdopterin oxidoreductase [Methylobacillus flagellatus KT]637937461 YP_544674</i>                                |                              |                           |                         |                        |            |                                               |                              |                           |                         |                        |                        |           |                |   |                   |  |
| <b>MFLA0564</b> |                                                                                                                        | 0.000                        | 0.000                     |                         |                        | ■ ■        |                                               | 0.000                        |                           | 0.000                   |                        | ■                      |           |                |   |                   |  |
|                 | <i>hypothetical protein [Methylobacillus flagellatus KT]637937462 YP_544675</i>                                        |                              |                           |                         |                        |            |                                               |                              |                           |                         |                        |                        |           |                |   |                   |  |
| <b>MFLA0565</b> |                                                                                                                        | 1.106                        | 3.919                     | 4.111                   | -1.814                 | Y ●● Y     | 2.88 E-2                                      | 19.254                       | 21.952                    | 22.159                  | -1.697                 | Y ●                    |           |                |   |                   |  |
|                 | <i>" transcriptional regulator, GntR family [Methylobacillus flagellatus KT]637937463 YP_544676 ""</i>                 |                              |                           |                         |                        |            |                                               |                              |                           |                         |                        |                        |           |                |   |                   |  |
| <b>MFLA0566</b> |                                                                                                                        | 0.000                        | 0.000                     |                         |                        | ■ ■        |                                               | 0.000                        |                           | 0.000                   |                        | ■                      |           |                |   |                   |  |
|                 | <i>hypothetical protein [Methylobacillus flagellatus KT]637937464 YP_544677</i>                                        |                              |                           |                         |                        |            |                                               |                              |                           |                         |                        |                        |           |                |   |                   |  |
| <b>MFLA0567</b> | 6.63 E-13                                                                                                              | 5.951                        | 6.961                     | 7.543                   | -1.175                 | G ●● Y     | 3.76 E-2                                      | 25.177                       | 26.691                    | 27.124                  | -1.839                 | G ●                    |           |                |   |                   |  |
|                 | <i>aspartate kinase [Methylobacillus flagellatus KT]637937467 YP_544678</i>                                            |                              |                           |                         |                        |            |                                               |                              |                           |                         |                        |                        |           |                |   |                   |  |
| <b>MFLA0568</b> | 3.09 E-5                                                                                                               | 7.808                        | 8.186                     | 9.010                   | -0.380                 | Y ●● Y     | 1.01 E-2                                      | 27.142                       | 28.193                    | 28.761                  | -1.079                 | Y ●                    |           |                |   |                   |  |
|                 | <i>alanyl-tRNA synthetase [Methylobacillus flagellatus KT]637937468 YP_544679</i>                                      |                              |                           |                         |                        |            |                                               |                              |                           |                         |                        |                        |           |                |   |                   |  |
| <b>MFLA0569</b> |                                                                                                                        |                              | 0.000                     | 0.000                   |                        | Y ●● Y     |                                               |                              | 18.235                    | 18.235                  |                        | Y ●                    |           |                |   |                   |  |
|                 | <i>regulatory protein RecX [Methylobacillus flagellatus KT]637937469 YP_544680</i>                                     |                              |                           |                         |                        |            |                                               |                              |                           |                         |                        |                        |           |                |   |                   |  |
| <b>MFLA0570</b> | 2.21 E-2                                                                                                               | 7.588                        | 7.813                     | 8.705                   | -0.222                 | Y ●● Y     | 1.1 E-2                                       | 27.324                       | 28.072                    | 28.746                  | -0.748                 | Y ●                    |           |                |   |                   |  |
|                 | <i>recA protein [Methylobacillus flagellatus KT]637937470 YP_544681</i>                                                |                              |                           |                         |                        |            |                                               |                              |                           |                         |                        |                        |           |                |   |                   |  |
| <b>MFLA0571</b> |                                                                                                                        | 3.591                        | 3.458                     | 4.526                   | 0.168                  | Y ●● G     | 8.9 E-3                                       | 21.529                       | 22.454                    | 23.065                  | -0.928                 | Y ●                    |           |                |   |                   |  |
|                 | <i>CinA-like protein [Methylobacillus flagellatus KT]637937471 YP_544682</i>                                           |                              |                           |                         |                        |            |                                               |                              |                           |                         |                        |                        |           |                |   |                   |  |
| <b>MFLA0572</b> |                                                                                                                        | 0.000                        | 0.000                     |                         |                        | ■ ■        |                                               | 0.000                        |                           | 0.000                   |                        | ■                      |           |                |   |                   |  |
|                 | <i>phosphatidylglycerophosphatase A [Methylobacillus flagellatus KT]637937472 YP_544683</i>                            |                              |                           |                         |                        |            |                                               |                              |                           |                         |                        |                        |           |                |   |                   |  |

| ORF             | AM/OH <i>M. Flagellatus</i> Spectral Count                                                                             |                              |                           |                         |                        |            | AM/OH <i>M. Flagellatus</i> Protein Intensity |                              |                           |                         |                        |                        | Consensus | Spectral Count |   | Protein Intensity |  |
|-----------------|------------------------------------------------------------------------------------------------------------------------|------------------------------|---------------------------|-------------------------|------------------------|------------|-----------------------------------------------|------------------------------|---------------------------|-------------------------|------------------------|------------------------|-----------|----------------|---|-------------------|--|
|                 | q-value                                                                                                                | log <sub>2</sub> Methylamine | log <sub>2</sub> Methanol | log <sub>2</sub> Sc Sum | log <sub>2</sub> Ratio | Regulation | q-value                                       | log <sub>2</sub> Methylamine | log <sub>2</sub> Methanol | log <sub>2</sub> PI Sum | log <sub>2</sub> Ratio | Log <sub>2</sub> Ratio |           | -7             | 0 | 7                 |  |
| <b>MFLA0573</b> |                                                                                                                        | 0.000                        | 0.000                     |                         |                        |            |                                               | 0.000                        | 0.000                     |                         |                        |                        |           |                |   |                   |  |
|                 | <i>thiamine-monophosphate kinase [Methylobacillus flagellatus KT]637937473 YP_544684</i>                               |                              |                           |                         |                        |            |                                               |                              |                           |                         |                        |                        |           |                |   |                   |  |
| <b>MFLA0574</b> | 3.502                                                                                                                  | 3.616                        | 4.560                     | -0.064                  | Y ●●● Y                |            | 2 E-1                                         | 23.807                       | 23.538                    | 24.679                  | 0.073                  | Y ●●                   |           |                |   |                   |  |
|                 | <i>molybdopterin binding domain [Methylobacillus flagellatus KT]637937474 YP_544685</i>                                |                              |                           |                         |                        |            |                                               |                              |                           |                         |                        |                        |           |                |   |                   |  |
| <b>MFLA0575</b> | 3.883                                                                                                                  | 4.129                        | 5.011                     | -0.236                  | Y ●●● Y                |            | 3.04 E-2                                      | 21.081                       | 22.196                    | 22.744                  | -1.098                 | Y ●●                   |           |                |   |                   |  |
|                 | <i>hypothetical protein [Methylobacillus flagellatus KT]637937475 YP_544686</i>                                        |                              |                           |                         |                        |            |                                               |                              |                           |                         |                        |                        |           |                |   |                   |  |
| <b>MFLA0576</b> | 3.744                                                                                                                  | 3.975                        | 4.864                     | -0.506                  | Y ●●● Y                |            | 1.09 E-1                                      | 23.476                       | 24.053                    | 24.793                  | -0.562                 | Y ●●                   |           |                |   |                   |  |
|                 | <i>" putative site-specific recombinase, prophage insertion [Methylobacillus flagellatus KT]637937476 YP_544687 ""</i> |                              |                           |                         |                        |            |                                               |                              |                           |                         |                        |                        |           |                |   |                   |  |
| <b>MFLA0577</b> | 0.000                                                                                                                  | 0.000                        |                           |                         |                        |            |                                               | 0.000                        | 0.000                     |                         |                        |                        |           |                |   |                   |  |
|                 | <i>Na<sup>+</sup>/H<sup>+</sup> antiporter subunit [Methylobacillus flagellatus KT]637937477 YP_544688</i>             |                              |                           |                         |                        |            |                                               |                              |                           |                         |                        |                        |           |                |   |                   |  |
| <b>MFLA0578</b> | 0.000                                                                                                                  | 0.000                        |                           |                         |                        |            |                                               | 0.000                        | 0.000                     |                         |                        |                        |           |                |   |                   |  |
|                 | <i>multiple resistance and pH regulation protein F [Methylobacillus flagellatus KT]637937478 YP_544689</i>             |                              |                           |                         |                        |            |                                               |                              |                           |                         |                        |                        |           |                |   |                   |  |
| <b>MFLA0579</b> |                                                                                                                        | 1.931                        | 1.931                     |                         | Y ●●● Y                |            |                                               |                              | 19.642                    | 19.642                  |                        | Y ●●                   |           |                |   |                   |  |
|                 | <i>cation antiporter [Methylobacillus flagellatus KT]637937479 YP_544690</i>                                           |                              |                           |                         |                        |            |                                               |                              |                           |                         |                        |                        |           |                |   |                   |  |
| <b>MFLA0580</b> | 0.000                                                                                                                  | 0.000                        |                           |                         |                        |            |                                               | 0.000                        | 0.000                     |                         |                        |                        |           |                |   |                   |  |
|                 | <i>NADH dehydrogenase (quinone) [Methylobacillus flagellatus KT]637937480 YP_544691</i>                                |                              |                           |                         |                        |            |                                               |                              |                           |                         |                        |                        |           |                |   |                   |  |
| <b>MFLA0581</b> | 0.000                                                                                                                  | 0.000                        |                           |                         |                        |            |                                               | 0.000                        | 0.000                     |                         |                        |                        |           |                |   |                   |  |
|                 | <i>" NADH-ubiquinone oxidoreductase, chain 4L [Methylobacillus flagellatus KT]637937481 YP_544692 ""</i>               |                              |                           |                         |                        |            |                                               |                              |                           |                         |                        |                        |           |                |   |                   |  |
| <b>MFLA0582</b> | 0.000                                                                                                                  | 0.000                        |                           |                         |                        |            |                                               | 0.000                        | 0.000                     |                         |                        |                        |           |                |   |                   |  |
|                 | <i>NADH dehydrogenase (quinone) [Methylobacillus flagellatus KT]637937482 YP_544693</i>                                |                              |                           |                         |                        |            |                                               |                              |                           |                         |                        |                        |           |                |   |                   |  |
| <b>MFLA0583</b> | 6.162                                                                                                                  | 6.413                        | 7.293                     | -0.200                  | Y ●●● Y                |            | 1.19 E-2                                      | 24.571                       | 25.272                    | 25.964                  | -0.698                 | Y ●●                   |           |                |   |                   |  |
|                 | <i>protein of unknown function DUF615 [Methylobacillus flagellatus KT]637937483 YP_544694</i>                          |                              |                           |                         |                        |            |                                               |                              |                           |                         |                        |                        |           |                |   |                   |  |
| <b>MFLA0584</b> | 6.187                                                                                                                  | 6.705                        | 7.469                     | -0.568                  | Y ●●● G                |            | 9.31 E-3                                      | 24.481                       | 25.742                    | 26.245                  | -1.277                 | G ●●                   |           |                |   |                   |  |
|                 | <i>" peptidase U62, modulator of DNA gyrase [Methylobacillus flagellatus KT]637937484 YP_544695 ""</i>                 |                              |                           |                         |                        |            |                                               |                              |                           |                         |                        |                        |           |                |   |                   |  |
| <b>MFLA0585</b> | 8.035                                                                                                                  | 6.642                        | 8.500                     | 1.010                   | Y ●●● Y                |            | 1.25 E-1                                      | 27.009                       | 25.981                    | 27.585                  | 0.513                  | Y ●●                   |           |                |   |                   |  |
|                 | <i>VacJ-like lipoprotein [Methylobacillus flagellatus KT]637937485 YP_544696</i>                                       |                              |                           |                         |                        |            |                                               |                              |                           |                         |                        |                        |           |                |   |                   |  |
| <b>MFLA0586</b> | 1.52 E-2                                                                                                               | 5.339                        | 5.605                     | 6.478                   | -1.080                 | Y ●●● Y    |                                               | 1.51 E-1                     | 23.665                    | 23.984                  | 24.833                 | -0.475                 | Y ●●      |                |   |                   |  |
|                 | <i>" Inositol phosphatase/fructose-1,6-bisphosphatase [Methylobacillus flagellatus KT]637937486 YP_544697 ""</i>       |                              |                           |                         |                        |            |                                               |                              |                           |                         |                        |                        |           |                |   |                   |  |
| <b>MFLA0587</b> | 0.000                                                                                                                  | 0.000                        |                           |                         |                        |            |                                               | 0.000                        | 0.000                     |                         |                        |                        |           |                |   |                   |  |
|                 | <i>" transcriptional regulator, AraC family [Methylobacillus flagellatus KT]637937487 YP_544698 ""</i>                 |                              |                           |                         |                        |            |                                               |                              |                           |                         |                        |                        |           |                |   |                   |  |
| <b>MFLA0588</b> | 0.000                                                                                                                  | 0.000                        |                           |                         |                        |            |                                               | 0.000                        | 0.000                     |                         |                        |                        |           |                |   |                   |  |
|                 | <i>short-chain dehydrogenase/reductase SDR [Methylobacillus flagellatus KT]637937488 YP_544699</i>                     |                              |                           |                         |                        |            |                                               |                              |                           |                         |                        |                        |           |                |   |                   |  |
| <b>MFLA0589</b> | 0.000                                                                                                                  | 0.000                        |                           |                         |                        |            |                                               | 0.000                        | 0.000                     |                         |                        |                        |           |                |   |                   |  |
|                 | <i>short-chain dehydrogenase/reductase SDR [Methylobacillus flagellatus KT]637937489 YP_544700</i>                     |                              |                           |                         |                        |            |                                               |                              |                           |                         |                        |                        |           |                |   |                   |  |
| <b>MFLA0590</b> | 0.000                                                                                                                  | 0.000                        |                           |                         |                        |            |                                               | 0.000                        | 0.000                     |                         |                        |                        |           |                |   |                   |  |
|                 | <i>hypothetical protein [Methylobacillus flagellatus KT]637937490 YP_544701</i>                                        |                              |                           |                         |                        |            |                                               |                              |                           |                         |                        |                        |           |                |   |                   |  |
| <b>MFLA0591</b> | 1.843                                                                                                                  | 1.585                        | 2.719                     | 0.258                   | Y ●●● Y                |            |                                               | 20.531                       | 20.012                    | 21.294                  | 0.519                  | Y ●●                   |           |                |   |                   |  |
|                 | <i>Deoxyribodipyrimidine photolyase [Methylobacillus flagellatus KT]637937491 YP_544702</i>                            |                              |                           |                         |                        |            |                                               |                              |                           |                         |                        |                        |           |                |   |                   |  |
| <b>MFLA0592</b> | 2.843                                                                                                                  | 0.346                        | 3.078                     | 2.496                   | Y ●●● Y                |            |                                               | 20.588                       | 17.992                    | 20.809                  | 2.596                  | Y ●●                   |           |                |   |                   |  |
|                 | <i>protein of unknown function DUF163 [Methylobacillus flagellatus KT]637937492 YP_544703</i>                          |                              |                           |                         |                        |            |                                               |                              |                           |                         |                        |                        |           |                |   |                   |  |
| <b>MFLA0593</b> | 5.653                                                                                                                  | 5.445                        | 6.553                     | 0.001                   | Y ●●● Y                |            | 2.68 E-1                                      | 25.122                       | 25.100                    | 26.111                  | 0.055                  | Y ●●                   |           |                |   |                   |  |
|                 | <i>Iojap-related protein [Methylobacillus flagellatus KT]637937493 YP_544704</i>                                       |                              |                           |                         |                        |            |                                               |                              |                           |                         |                        |                        |           |                |   |                   |  |
| <b>MFLA0594</b> | 0.000                                                                                                                  | 0.000                        |                           |                         |                        |            |                                               | 0.000                        | 0.000                     |                         |                        |                        |           |                |   |                   |  |
|                 | <i>aspartate 1-decarboxylase [Methylobacillus flagellatus KT]637937494 YP_544705</i>                                   |                              |                           |                         |                        |            |                                               |                              |                           |                         |                        |                        |           |                |   |                   |  |

| ORF             | AM/OH <i>M. Flagellatus</i> Spectral Count                                                                                       |                              |                           |                         |                        |            | AM/OH <i>M. Flagellatus</i> Protein Intensity |                              |                           |                         |                        |                        | Consensus | Spectral Count |   | Protein Intensity |  |
|-----------------|----------------------------------------------------------------------------------------------------------------------------------|------------------------------|---------------------------|-------------------------|------------------------|------------|-----------------------------------------------|------------------------------|---------------------------|-------------------------|------------------------|------------------------|-----------|----------------|---|-------------------|--|
|                 | <i>q</i> -value                                                                                                                  | log <sub>2</sub> Methylamine | log <sub>2</sub> Methanol | log <sub>2</sub> Sc Sum | log <sub>2</sub> Ratio | Regulation | <i>q</i> -value                               | log <sub>2</sub> Methylamine | log <sub>2</sub> Methanol | log <sub>2</sub> PI Sum | log <sub>2</sub> Ratio | Log <sub>2</sub> Ratio |           | -7             | 0 | 7                 |  |
| <b>MFLA0595</b> |                                                                                                                                  | 0.000                        | 0.000                     |                         |                        |            |                                               | 0.000                        | 0.000                     |                         |                        |                        |           |                |   |                   |  |
|                 | <i>hypothetical protein [Methylobacillus flagellatus KT]637937495 YP_544706</i>                                                  |                              |                           |                         |                        |            |                                               |                              |                           |                         |                        |                        |           |                |   |                   |  |
| <b>MFLA0596</b> | 1.01 E-1                                                                                                                         | 5.448                        | 5.194                     | 6.327                   | 0.276                  | Y ●● Y     | 7.27 E-2                                      | 23.701                       | 24.292                    | 25.027                  | -0.729                 | Y ●●                   |           |                |   |                   |  |
|                 | <i>pantoate--beta-alanine ligase [Methylobacillus flagellatus KT]637937496 YP_544707</i>                                         |                              |                           |                         |                        |            |                                               |                              |                           |                         |                        |                        |           |                |   |                   |  |
| <b>MFLA0597</b> | 4.23 E-15                                                                                                                        | 4.908                        | 6.460                     | 6.883                   | -1.779                 | G ●● Y     | 2.42 E-2                                      | 23.353                       | 24.738                    | 25.206                  | -1.701                 | G ●●                   |           |                |   |                   |  |
|                 | <i>3-methyl-2-oxobutanoate hydroxymethyltransferase [Methylobacillus flagellatus KT]637937497 YP_544708</i>                      |                              |                           |                         |                        |            |                                               |                              |                           |                         |                        |                        |           |                |   |                   |  |
| <b>MFLA0598</b> | 1 E-2                                                                                                                            | 4.521                        | 6.129                     | 6.538                   | -0.578                 | Y ●● Y     | 2.18 E-1                                      | 22.930                       | 24.028                    | 24.581                  | -0.075                 | Y ●●                   |           |                |   |                   |  |
|                 | <i>deoxynucleoside kinase [Methylobacillus flagellatus KT]637937498 YP_544709</i>                                                |                              |                           |                         |                        |            |                                               |                              |                           |                         |                        |                        |           |                |   |                   |  |
| <b>MFLA0599</b> |                                                                                                                                  | 0.000                        | 0.000                     |                         |                        |            |                                               | 0.000                        | 0.000                     |                         |                        |                        |           |                |   |                   |  |
|                 | <i>2-amino-4-hydroxy-6- hydroxymethylidihydropteridine pyrophosphokinase [Methylobacillus flagellatus KT]637937499 YP_544710</i> |                              |                           |                         |                        |            |                                               |                              |                           |                         |                        |                        |           |                |   |                   |  |
| <b>MFLA0600</b> |                                                                                                                                  | 5.191                        | 5.676                     | 6.454                   | -0.576                 | Y ●● Y     | 3.02 E-2                                      | 23.655                       | 25.079                    | 25.536                  | -1.608                 | Y ●●                   |           |                |   |                   |  |
|                 | <i>poly(A) polymerase [Methylobacillus flagellatus KT]637937500 YP_544711</i>                                                    |                              |                           |                         |                        |            |                                               |                              |                           |                         |                        |                        |           |                |   |                   |  |
| <b>MFLA0601</b> |                                                                                                                                  | 3.804                        | 3.095                     | 4.493                   | 0.723                  | Y ●● Y     | 2.55 E-2                                      | 22.040                       | 22.362                    | 23.210                  | -0.329                 | Y ●●                   |           |                |   |                   |  |
|                 | <i>metal dependent phosphohydrolase [Methylobacillus flagellatus KT]637937501 YP_544712</i>                                      |                              |                           |                         |                        |            |                                               |                              |                           |                         |                        |                        |           |                |   |                   |  |
| <b>MFLA0602</b> | 9.43 E-2                                                                                                                         | 5.097                        | 5.014                     | 6.056                   | 0.163                  | Y ●● Y     | 2.02 E-1                                      | 23.255                       | 23.512                    | 24.389                  | -0.300                 | Y ●●                   |           |                |   |                   |  |
|                 | <i>" CRISPR-associated protein, CT1134 [Methylobacillus flagellatus KT]637937502 YP_544713 ""</i>                                |                              |                           |                         |                        |            |                                               |                              |                           |                         |                        |                        |           |                |   |                   |  |
| <b>MFLA0603</b> |                                                                                                                                  | 6.259                        | 6.216                     | 7.238                   | 0.200                  | Y ●● Y     | 9.48 E-2                                      | 25.444                       | 25.823                    | 26.646                  | -0.419                 | Y ●●                   |           |                |   |                   |  |
|                 | <i>" CRISPR-associated protein, CT1133 [Methylobacillus flagellatus KT]637937503 YP_544714 ""</i>                                |                              |                           |                         |                        |            |                                               |                              |                           |                         |                        |                        |           |                |   |                   |  |
| <b>MFLA0604</b> | 2.97 E-2                                                                                                                         | 6.702                        | 6.867                     | 7.787                   | -0.199                 | Y ●● Y     | 1.99 E-2                                      | 26.419                       | 27.147                    | 27.829                  | -0.745                 | Y ●●                   |           |                |   |                   |  |
|                 | <i>CRISPR-associated protein TM1801 [Methylobacillus flagellatus KT]637937504 YP_544715</i>                                      |                              |                           |                         |                        |            |                                               |                              |                           |                         |                        |                        |           |                |   |                   |  |
| <b>MFLA0605</b> |                                                                                                                                  | 0.000                        | 0.000                     |                         |                        |            |                                               | 0.000                        | 0.000                     |                         |                        |                        |           |                |   |                   |  |
|                 | <i>CRISPR-associated protein Cas4 [Methylobacillus flagellatus KT]637937505 YP_544716</i>                                        |                              |                           |                         |                        |            |                                               |                              |                           |                         |                        |                        |           |                |   |                   |  |
| <b>MFLA0606</b> |                                                                                                                                  | 3.883                        |                           | 3.883                   |                        | Y ●● Y     |                                               | 19.785                       |                           | 19.785                  |                        | Y ●●                   |           |                |   |                   |  |
|                 | <i>CRISPR-associated protein Cas1 [Methylobacillus flagellatus KT]637937506 YP_544717</i>                                        |                              |                           |                         |                        |            |                                               |                              |                           |                         |                        |                        |           |                |   |                   |  |
| <b>MFLA0607</b> |                                                                                                                                  | 0.000                        | 0.000                     |                         |                        |            |                                               | 0.000                        | 0.000                     |                         |                        |                        |           |                |   |                   |  |
|                 | <i>protein of unknown function DUF196 [Methylobacillus flagellatus KT]637937507 YP_544718</i>                                    |                              |                           |                         |                        |            |                                               |                              |                           |                         |                        |                        |           |                |   |                   |  |
| <b>MFLA0608</b> |                                                                                                                                  | 0.000                        | 0.000                     |                         |                        |            |                                               | 0.000                        | 0.000                     |                         |                        |                        |           |                |   |                   |  |
|                 | <i>putative signaling membrane protein [Methylobacillus flagellatus KT]637937508 YP_544719</i>                                   |                              |                           |                         |                        |            |                                               |                              |                           |                         |                        |                        |           |                |   |                   |  |
| <b>MFLA0609</b> |                                                                                                                                  | 3.915                        |                           | 3.915                   |                        | Y ●● Y     |                                               | 22.982                       |                           | 22.982                  |                        | Y ●●                   |           |                |   |                   |  |
|                 | <i>Sulphate transport system permease protein 1 [Methylobacillus flagellatus KT]637937509 YP_544720</i>                          |                              |                           |                         |                        |            |                                               |                              |                           |                         |                        |                        |           |                |   |                   |  |
| <b>MFLA0610</b> |                                                                                                                                  | 0.000                        | 0.000                     |                         |                        |            |                                               | 0.000                        | 0.000                     |                         |                        |                        |           |                |   |                   |  |
|                 | <i>" Sulfate ABC transporter, permease protein CysW [Methylobacillus flagellatus KT]637937510 YP_544721 ""</i>                   |                              |                           |                         |                        |            |                                               |                              |                           |                         |                        |                        |           |                |   |                   |  |
| <b>MFLA0611</b> |                                                                                                                                  | 0.000                        | 0.000                     |                         |                        |            |                                               | 0.000                        | 0.000                     |                         |                        |                        |           |                |   |                   |  |
|                 | <i>" Sulfate ABC transporter, permease protein CysT [Methylobacillus flagellatus KT]637937511 YP_544722 ""</i>                   |                              |                           |                         |                        |            |                                               |                              |                           |                         |                        |                        |           |                |   |                   |  |
| <b>MFLA0612</b> |                                                                                                                                  | 0.000                        | 0.000                     |                         |                        |            |                                               | 0.000                        | 0.000                     |                         |                        |                        |           |                |   |                   |  |
|                 | <i>diguanylate phosphodiesterase (EAL domain) [Methylobacillus flagellatus KT]637937512 YP_544723</i>                            |                              |                           |                         |                        |            |                                               |                              |                           |                         |                        |                        |           |                |   |                   |  |
| <b>MFLA0613</b> |                                                                                                                                  | 0.000                        | 0.000                     |                         |                        |            |                                               | 0.000                        | 0.000                     |                         |                        |                        |           |                |   |                   |  |
|                 | <i>hypothetical protein [Methylobacillus flagellatus KT]637937513 YP_544724</i>                                                  |                              |                           |                         |                        |            |                                               |                              |                           |                         |                        |                        |           |                |   |                   |  |
| <b>MFLA0614</b> |                                                                                                                                  | 3.532                        |                           | 3.532                   |                        | Y ●● Y     |                                               | 22.321                       |                           | 22.321                  |                        | Y ●●                   |           |                |   |                   |  |
|                 | <i>Thiosulphate-binding protein [Methylobacillus flagellatus KT]637937514 YP_544725</i>                                          |                              |                           |                         |                        |            |                                               |                              |                           |                         |                        |                        |           |                |   |                   |  |
| <b>MFLA0615</b> |                                                                                                                                  | 0.000                        | 0.000                     |                         |                        |            |                                               | 0.000                        | 0.000                     |                         |                        |                        |           |                |   |                   |  |
|                 | <i>Serine O-acetyltransferase [Methylobacillus flagellatus KT]637937515 YP_544726</i>                                            |                              |                           |                         |                        |            |                                               |                              |                           |                         |                        |                        |           |                |   |                   |  |
| <b>MFLA0616</b> |                                                                                                                                  | 0.000                        | 0.000                     |                         |                        |            |                                               | 0.000                        | 0.000                     |                         |                        |                        |           |                |   |                   |  |
|                 | <i>major membrane protein I [Methylobacillus flagellatus KT]637937516 YP_544727</i>                                              |                              |                           |                         |                        |            |                                               |                              |                           |                         |                        |                        |           |                |   |                   |  |

| ORF             | AM/OH <i>M. Flagellatus</i> Spectral Count                                                                  |                      |                   |                 |                 |            | AM/OH <i>M. Flagellatus</i> Protein Intensity |                      |                   |                 |                 |                        | Consensus | Spectral Count |   | Protein Intensity |  |
|-----------------|-------------------------------------------------------------------------------------------------------------|----------------------|-------------------|-----------------|-----------------|------------|-----------------------------------------------|----------------------|-------------------|-----------------|-----------------|------------------------|-----------|----------------|---|-------------------|--|
|                 | $q$ -value                                                                                                  | $\log_2$ Methylamine | $\log_2$ Methanol | $\log_2$ Sc Sum | $\log_2$ -Ratio | Regulation | $q$ -value                                    | $\log_2$ Methylamine | $\log_2$ Methanol | $\log_2$ PI Sum | $\log_2$ -Ratio | Log <sub>2</sub> Ratio |           | -7             | 0 | 7                 |  |
| <b>MFLA0617</b> |                                                                                                             | 0.000                | 0.000             |                 |                 |            |                                               | 0.000                | 0.000             |                 |                 |                        |           |                |   |                   |  |
|                 | <i>"cysteine desulfurases, SufS subfamily [Methylobacillus flagellatus KT]637937517 YP_544728 ""</i>        |                      |                   |                 |                 |            |                                               |                      |                   |                 |                 |                        |           |                |   |                   |  |
| <b>MFLA0618</b> |                                                                                                             | 0.000                | 0.000             |                 |                 |            |                                               | 0.000                | 0.000             |                 |                 |                        |           |                |   |                   |  |
|                 | <i>molybdenum-pterin binding domain [Methylobacillus flagellatus KT]637937518 YP_544729</i>                 |                      |                   |                 |                 |            |                                               |                      |                   |                 |                 |                        |           |                |   |                   |  |
| <b>MFLA0619</b> |                                                                                                             | 0.000                | 0.000             |                 |                 |            |                                               | 0.000                | 0.000             |                 |                 |                        |           |                |   |                   |  |
|                 | <i>hypothetical protein [Methylobacillus flagellatus KT]637937519 YP_544730</i>                             |                      |                   |                 |                 |            |                                               |                      |                   |                 |                 |                        |           |                |   |                   |  |
| <b>MFLA0620</b> | 4.128                                                                                                       |                      |                   | 4.128           |                 | Y          | ●                                             | 21.802               |                   | 21.802          |                 | Y                      | ●         |                |   |                   |  |
|                 | <i>Thiosulphate-binding protein [Methylobacillus flagellatus KT]637937520 YP_544731</i>                     |                      |                   |                 |                 |            |                                               |                      |                   |                 |                 |                        |           |                |   |                   |  |
| <b>MFLA0621</b> |                                                                                                             | 0.000                | 0.000             |                 |                 |            |                                               | 0.000                | 0.000             |                 |                 |                        |           |                |   |                   |  |
|                 | <i>hypothetical protein [Methylobacillus flagellatus KT]637937521 YP_544732</i>                             |                      |                   |                 |                 |            |                                               |                      |                   |                 |                 |                        |           |                |   |                   |  |
| <b>MFLA0622</b> | 3.318                                                                                                       |                      |                   | 3.318           |                 | Y          | ●                                             | 20.700               |                   | 20.700          |                 | Y                      | ●         |                |   |                   |  |
|                 | <i>hypothetical protein [Methylobacillus flagellatus KT]637937522 YP_544733</i>                             |                      |                   |                 |                 |            |                                               |                      |                   |                 |                 |                        |           |                |   |                   |  |
| <b>MFLA0623</b> |                                                                                                             | 0.000                | 0.000             |                 |                 |            |                                               | 0.000                | 0.000             |                 |                 |                        |           |                |   |                   |  |
|                 | <i>hypothetical protein [Methylobacillus flagellatus KT]637937523 YP_544734</i>                             |                      |                   |                 |                 |            |                                               |                      |                   |                 |                 |                        |           |                |   |                   |  |
| <b>MFLA0624</b> | 2.135                                                                                                       | 0.585                | 2.559             | 1.550           | Y               | ●          | 19.678                                        | 19.064               | 20.403            | 0.614           | Y               | ●                      |           |                |   |                   |  |
|                 | <i>Glutamate racemase [Methylobacillus flagellatus KT]637937524 YP_544735</i>                               |                      |                   |                 |                 |            |                                               |                      |                   |                 |                 |                        |           |                |   |                   |  |
| <b>MFLA0625</b> | 3.398                                                                                                       | 2.844                | 4.147             | 1.564           | Y               | ●          | 2.75 E-1                                      | 21.173               | 22.170            | 22.756          | 0.006           | Y                      | ●         |                |   |                   |  |
|                 | <i>hypothetical protein [Methylobacillus flagellatus KT]637937525 YP_544736</i>                             |                      |                   |                 |                 |            |                                               |                      |                   |                 |                 |                        |           |                |   |                   |  |
| <b>MFLA0626</b> | 7.36 E-4                                                                                                    | 7.993                | 7.678             | 8.844           | 0.304           | Y          | ●                                             | 1.44 E-1             | 27.001            | 27.461          | 28.249          | -0.720                 | Y         | ●              |   |                   |  |
|                 | <i>branched-chain amino acid aminotransferase [Methylobacillus flagellatus KT]637937526 YP_544737</i>       |                      |                   |                 |                 |            |                                               |                      |                   |                 |                 |                        |           |                |   |                   |  |
| <b>MFLA0627</b> | 0                                                                                                           | 8.542                | 4.746             | 8.642           | 3.824           | R          | ●                                             | 3.17 E-2             | 27.138            | 22.267          | 27.187          | 4.861                  | R         | ●              |   |                   |  |
|                 | <i>OmpW [Methylobacillus flagellatus KT]637937527 YP_544738</i>                                             |                      |                   |                 |                 |            |                                               |                      |                   |                 |                 |                        |           |                |   |                   |  |
| <b>MFLA0628</b> | 2.521                                                                                                       | 1.322                | 3.042             | 1.199           | Y               | ●          | 20.123                                        | 18.616               | 20.558            | 1.507           | Y               | ●                      |           |                |   |                   |  |
|                 | <i>electron transport protein SCO1/SenC [Methylobacillus flagellatus KT]637937528 YP_544739</i>             |                      |                   |                 |                 |            |                                               |                      |                   |                 |                 |                        |           |                |   |                   |  |
| <b>MFLA0629</b> | 4.328                                                                                                       |                      |                   | 4.328           |                 | Y          | ●                                             | 23.464               |                   | 23.464          |                 | Y                      | ●         |                |   |                   |  |
|                 | <i>"cytochrome c oxidase, cbb3-type, subunit I [Methylobacillus flagellatus KT]637937529 YP_544740 ""</i>   |                      |                   |                 |                 |            |                                               |                      |                   |                 |                 |                        |           |                |   |                   |  |
| <b>MFLA0630</b> | 7.930                                                                                                       | 7.518                | 8.739             | 0.440           | Y               | ●          | 2.02 E-1                                      | 28.382               | 28.376            | 29.379          | 0.006           | Y                      | ●         |                |   |                   |  |
|                 | <i>"cytochrome c oxidase, cbb3-type, subunit II [Methylobacillus flagellatus KT]637937530 YP_544741 ""</i>  |                      |                   |                 |                 |            |                                               |                      |                   |                 |                 |                        |           |                |   |                   |  |
| <b>MFLA0631</b> |                                                                                                             | 0.000                | 0.000             |                 |                 |            |                                               | 0.000                | 0.000             |                 |                 |                        |           |                |   |                   |  |
|                 | <i>hypothetical protein [Methylobacillus flagellatus KT]637937531 YP_544742</i>                             |                      |                   |                 |                 |            |                                               |                      |                   |                 |                 |                        |           |                |   |                   |  |
| <b>MFLA0632</b> | 8.503                                                                                                       | 8.289                | 9.400             | 0.266           | Y               | ●          | 7.24 E-2                                      | 28.005               | 28.258            | 29.137          | -0.241          | Y                      | ●         |                |   |                   |  |
|                 | <i>"cytochrome c oxidase, cbb3-type, subunit III [Methylobacillus flagellatus KT]637937532 YP_544743 ""</i> |                      |                   |                 |                 |            |                                               |                      |                   |                 |                 |                        |           |                |   |                   |  |
| <b>MFLA0633</b> | 5.233                                                                                                       | 4.251                | 5.824             | 0.731           | Y               | ●          | 2.39 E-2                                      | 23.902               | 23.510            | 24.719          | 0.398           | Y                      | ●         |                |   |                   |  |
|                 | <i>"4Fe-4S ferredoxin, iron-sulfur binding [Methylobacillus flagellatus KT]637937533 YP_544744 ""</i>       |                      |                   |                 |                 |            |                                               |                      |                   |                 |                 |                        |           |                |   |                   |  |
| <b>MFLA0634</b> | 4.678                                                                                                       | 4.036                | 5.393             | 0.625           | Y               | ●          | 8.3 E-2                                       | 24.399               | 24.225            | 25.314          | 0.176           | Y                      | ●         |                |   |                   |  |
|                 | <i>hypothetical protein [Methylobacillus flagellatus KT]637937534 YP_544745</i>                             |                      |                   |                 |                 |            |                                               |                      |                   |                 |                 |                        |           |                |   |                   |  |
| <b>MFLA0635</b> | 3.210                                                                                                       | 3.410                | 4.313             | -0.091          | Y               | ●          | 3.54 E-2                                      | 21.999               | 22.863            | 23.495          | -0.850          | Y                      | ●         |                |   |                   |  |
|                 | <i>Heavy metal translocating P-type ATPase [Methylobacillus flagellatus KT]637937535 YP_544746</i>          |                      |                   |                 |                 |            |                                               |                      |                   |                 |                 |                        |           |                |   |                   |  |
| <b>MFLA0636</b> | 2.980                                                                                                       | 1.807                | 3.510             | 1.173           | Y               | ●          | 22.941                                        | 23.929               | 24.518            | -0.988          | Y               | ●                      |           |                |   |                   |  |
|                 | <i>bacterioferritin [Methylobacillus flagellatus KT]637937536 YP_544747</i>                                 |                      |                   |                 |                 |            |                                               |                      |                   |                 |                 |                        |           |                |   |                   |  |
| <b>MFLA0637</b> | 3.97 E-8                                                                                                    | 4.581                | 5.960             | 6.429           | -1.325          | G          | ●                                             | 4.79 E-2             | 24.010            | 24.809          | 25.464          | -0.960                 | G         | ●              |   |                   |  |
|                 | <i>bacterioferritin [Methylobacillus flagellatus KT]637937537 YP_544748</i>                                 |                      |                   |                 |                 |            |                                               |                      |                   |                 |                 |                        |           |                |   |                   |  |
| <b>MFLA0638</b> |                                                                                                             | 0.000                | 0.000             |                 |                 |            |                                               | 0.000                | 0.000             |                 |                 |                        |           |                |   |                   |  |
|                 | <i>BFD-like (2Fe-2S)-binding region [Methylobacillus flagellatus KT]637937538 YP_544749</i>                 |                      |                   |                 |                 |            |                                               |                      |                   |                 |                 |                        |           |                |   |                   |  |

| ORF             | AM/OH <i>M. Flagellatus</i> Spectral Count                                                                                   |                             |                           |                         |                        |            | AM/OH <i>M. Flagellatus</i> Protein Intensity |                             |                           |                         |                        |                        | Consensus | Spectral Count |   | Protein Intensity |  |
|-----------------|------------------------------------------------------------------------------------------------------------------------------|-----------------------------|---------------------------|-------------------------|------------------------|------------|-----------------------------------------------|-----------------------------|---------------------------|-------------------------|------------------------|------------------------|-----------|----------------|---|-------------------|--|
|                 | q-value                                                                                                                      | log <sub>2</sub> Methyamine | log <sub>2</sub> Methanol | log <sub>2</sub> Sc Sum | log <sub>2</sub> Ratio | Regulation | q-value                                       | log <sub>2</sub> Methyamine | log <sub>2</sub> Methanol | log <sub>2</sub> PI Sum | log <sub>2</sub> Ratio | Log <sub>2</sub> Ratio |           | -7             | 0 | 7                 |  |
| <b>MFLA0639</b> |                                                                                                                              |                             | 1.668                     | 1.668                   |                        | Y ●● Y     |                                               |                             | 21.156                    | 21.156                  |                        | Y ●                    |           |                |   |                   |  |
|                 | <i>globin [Methylobacillus flagellatus KT]637937539 YP_544750</i>                                                            |                             |                           |                         |                        |            |                                               |                             |                           |                         |                        |                        |           |                |   |                   |  |
| <b>MFLA0640</b> |                                                                                                                              | 1.843                       |                           | 1.843                   |                        | Y ●● Y     |                                               | 17.928                      |                           | 17.928                  |                        | Y ●                    |           |                |   |                   |  |
|                 | <i>" transcriptional regulator, BadM/Rrf2 family [Methylobacillus flagellatus KT]637937540 YP_544751 ""</i>                  |                             |                           |                         |                        |            |                                               |                             |                           |                         |                        |                        |           |                |   |                   |  |
| <b>MFLA0641</b> |                                                                                                                              | 0.000                       | 0.000                     |                         |                        | ■●         |                                               | 0.000                       | 0.000                     |                         |                        | ■                      |           |                |   |                   |  |
|                 | <i>protein of unknown function DUF45 [Methylobacillus flagellatus KT]637937541 YP_544752</i>                                 |                             |                           |                         |                        |            |                                               |                             |                           |                         |                        |                        |           |                |   |                   |  |
| <b>MFLA0642</b> | 3.943                                                                                                                        | 3.974                       | 4.959                     | -0.336                  | Y ●● Y                 |            | 2.48 E-1                                      | 22.435                      | 22.634                    | 23.538                  | -1.242                 | Y ●                    |           |                |   |                   |  |
|                 | <i>phospholipid/glycerol acyltransferase [Methylobacillus flagellatus KT]637937542 YP_544753</i>                             |                             |                           |                         |                        |            |                                               |                             |                           |                         |                        |                        |           |                |   |                   |  |
| <b>MFLA0643</b> | 1.38 E-1                                                                                                                     | 5.039                       | 5.379                     | 6.219                   | -0.457                 | Y ●● Y     | 8.61 E-2                                      | 23.602                      | 23.855                    | 24.734                  | -0.276                 | Y ●                    |           |                |   |                   |  |
|                 | <i>Histidinol-phosphate phosphatase [Methylobacillus flagellatus KT]637937543 YP_544754</i>                                  |                             |                           |                         |                        |            |                                               |                             |                           |                         |                        |                        |           |                |   |                   |  |
| <b>MFLA0644</b> | 5.1 E-2                                                                                                                      | 7.603                       | 7.816                     | 8.713                   | -0.213                 | Y ●● Y     | 1.04 E-1                                      | 26.877                      | 27.106                    | 27.996                  | -0.255                 | Y ●                    |           |                |   |                   |  |
|                 | <i>Glycine--tRNA ligase [Methylobacillus flagellatus KT]637937544 YP_544755</i>                                              |                             |                           |                         |                        |            |                                               |                             |                           |                         |                        |                        |           |                |   |                   |  |
| <b>MFLA0645</b> |                                                                                                                              | 3.996                       | 4.745                     | 5.418                   | -0.728                 | Y ●● Y     | 6.17 E-2                                      | 23.408                      | 24.549                    | 25.088                  | -1.082                 | Y ●                    |           |                |   |                   |  |
|                 | <i>Glycine--tRNA ligase [Methylobacillus flagellatus KT]637937545 YP_544756</i>                                              |                             |                           |                         |                        |            |                                               |                             |                           |                         |                        |                        |           |                |   |                   |  |
| <b>MFLA0646</b> |                                                                                                                              | 0.000                       | 0.000                     |                         |                        | ■●         |                                               | 0.000                       | 0.000                     |                         |                        | ■                      |           |                |   |                   |  |
|                 | <i>apolipoprotein N-acyltransferase [Methylobacillus flagellatus KT]637937546 YP_544757</i>                                  |                             |                           |                         |                        |            |                                               |                             |                           |                         |                        |                        |           |                |   |                   |  |
| <b>MFLA0647</b> |                                                                                                                              | 3.221                       | 0.346                     | 3.405                   | 2.875                  | Y ●● Y     |                                               | 23.863                      | 20.801                    | 24.026                  | 3.062                  | Y ●                    |           |                |   |                   |  |
|                 | <i>large conductance mechanosensitive channel protein [Methylobacillus flagellatus KT]637937547 YP_544758</i>                |                             |                           |                         |                        |            |                                               |                             |                           |                         |                        |                        |           |                |   |                   |  |
| <b>MFLA0648</b> | 5.41 E-2                                                                                                                     | 6.014                       | 6.059                     | 7.037                   | -0.098                 | Y ●● Y     | 3.18 E-2                                      | 24.680                      | 25.624                    | 26.228                  | -1.081                 | Y ●                    |           |                |   |                   |  |
|                 | <i>CBS [Methylobacillus flagellatus KT]637937548 YP_544759</i>                                                               |                             |                           |                         |                        |            |                                               |                             |                           |                         |                        |                        |           |                |   |                   |  |
| <b>MFLA0649</b> |                                                                                                                              | 0.000                       | 0.000                     |                         |                        | ■●         |                                               | 0.000                       | 0.000                     |                         |                        | ■                      |           |                |   |                   |  |
|                 | <i>protein of unknown function UPF0054 [Methylobacillus flagellatus KT]637937549 YP_544760</i>                               |                             |                           |                         |                        |            |                                               |                             |                           |                         |                        |                        |           |                |   |                   |  |
| <b>MFLA0650</b> | 1.36 E-11                                                                                                                    | 5.210                       | 6.564                     | 7.040                   | -1.389                 | G ●● Y     | 3.17 E-2                                      | 24.827                      | 26.237                    | 26.698                  | -1.349                 | G ●                    |           |                |   |                   |  |
|                 | <i>PhoH-like protein [Methylobacillus flagellatus KT]637937550 YP_544761</i>                                                 |                             |                           |                         |                        |            |                                               |                             |                           |                         |                        |                        |           |                |   |                   |  |
| <b>MFLA0651</b> |                                                                                                                              | 5.357                       | 0.585                     | 5.409                   | 3.647                  | Y ●● Y     | 1.33 E-1                                      | 23.656                      | 20.550                    | 23.815                  | 1.718                  | Y ●                    |           |                |   |                   |  |
|                 | <i>tRNA-i(6)A37 modification enzyme MiaB [Methylobacillus flagellatus KT]637937551 YP_544762</i>                             |                             |                           |                         |                        |            |                                               |                             |                           |                         |                        |                        |           |                |   |                   |  |
| <b>MFLA0652</b> |                                                                                                                              | 3.960                       | 4.219                     | 5.096                   | -0.332                 | Y ●● Y     | 1.2 E-2                                       | 21.695                      | 23.026                    | 23.509                  | -1.363                 | Y ●                    |           |                |   |                   |  |
|                 | <i>uroporphyrin-III C-methyltransferase [Methylobacillus flagellatus KT]637937552 YP_544763</i>                              |                             |                           |                         |                        |            |                                               |                             |                           |                         |                        |                        |           |                |   |                   |  |
| <b>MFLA0653</b> |                                                                                                                              | 3.835                       | 3.198                     | 4.552                   | 0.494                  | Y ●● Y     | 9.18 E-2                                      | 22.973                      | 23.333                    | 24.164                  | -0.355                 | Y ●                    |           |                |   |                   |  |
|                 | <i>histidine kinase [Methylobacillus flagellatus KT]637937553 YP_544764</i>                                                  |                             |                           |                         |                        |            |                                               |                             |                           |                         |                        |                        |           |                |   |                   |  |
| <b>MFLA0654</b> | 8.61 E-2                                                                                                                     | 6.325                       | 6.095                     | 7.215                   | 0.240                  | Y ●● Y     | 5.91 E-2                                      | 25.645                      | 26.286                    | 27.000                  | -0.633                 | Y ●                    |           |                |   |                   |  |
|                 | <i>" two component transcriptional regulator, winged helix family [Methylobacillus flagellatus KT]637937554 YP_544765 ""</i> |                             |                           |                         |                        |            |                                               |                             |                           |                         |                        |                        |           |                |   |                   |  |
| <b>MFLA0655</b> |                                                                                                                              | 0.000                       | 0.000                     |                         |                        | ■●         |                                               | 0.000                       | 0.000                     |                         |                        | ■                      |           |                |   |                   |  |
|                 | <i>putative signal transduction protein with EFhand domain [Methylobacillus flagellatus KT]637937555 YP_544766</i>           |                             |                           |                         |                        |            |                                               |                             |                           |                         |                        |                        |           |                |   |                   |  |
| <b>MFLA0656</b> |                                                                                                                              | 0.000                       | 0.000                     |                         |                        | ■●         |                                               | 0.000                       | 0.000                     |                         |                        | ■                      |           |                |   |                   |  |
|                 | <i>osmotically inducible lipoprotein [Methylobacillus flagellatus KT]637937556 YP_544767</i>                                 |                             |                           |                         |                        |            |                                               |                             |                           |                         |                        |                        |           |                |   |                   |  |
| <b>MFLA0657</b> |                                                                                                                              | 0.000                       | 0.000                     |                         |                        | ■●         |                                               | 0.000                       | 0.000                     |                         |                        | ■                      |           |                |   |                   |  |
|                 | <i>protein of unknown function DUF482 [Methylobacillus flagellatus KT]637937557 YP_544768</i>                                |                             |                           |                         |                        |            |                                               |                             |                           |                         |                        |                        |           |                |   |                   |  |
| <b>MFLA0658</b> |                                                                                                                              | 4.259                       |                           | 4.259                   |                        | Y ●● Y     |                                               | 21.098                      |                           | 21.098                  |                        | Y ●                    |           |                |   |                   |  |
|                 | <i>Potassium efflux system protein [Methylobacillus flagellatus KT]637937558 YP_544769</i>                                   |                             |                           |                         |                        |            |                                               |                             |                           |                         |                        |                        |           |                |   |                   |  |
| <b>MFLA0659</b> |                                                                                                                              | 0.000                       | 0.000                     |                         |                        | ■●         |                                               | 0.000                       | 0.000                     |                         |                        | ■                      |           |                |   |                   |  |
|                 | <i>cyclase/dehydrase [Methylobacillus flagellatus KT]637937559 YP_544770</i>                                                 |                             |                           |                         |                        |            |                                               |                             |                           |                         |                        |                        |           |                |   |                   |  |
| <b>MFLA0660</b> |                                                                                                                              | 0.000                       | 0.000                     |                         |                        | ■●         |                                               | 0.000                       | 0.000                     |                         |                        | ■                      |           |                |   |                   |  |
|                 | <i>hypothetical protein [Methylobacillus flagellatus KT]637937560 YP_544771</i>                                              |                             |                           |                         |                        |            |                                               |                             |                           |                         |                        |                        |           |                |   |                   |  |

| ORF             | AM/OH <i>M. Flagellatus</i> Spectral Count                                                                                                                |                              |                           |                         |                        | AM/OH <i>M. Flagellatus</i> Protein Intensity |          |                              |                           |                         | Spectral Count         |           | Protein Intensity |  | Log <sub>2</sub> Ratio |
|-----------------|-----------------------------------------------------------------------------------------------------------------------------------------------------------|------------------------------|---------------------------|-------------------------|------------------------|-----------------------------------------------|----------|------------------------------|---------------------------|-------------------------|------------------------|-----------|-------------------|--|------------------------|
|                 | q-value                                                                                                                                                   | log <sub>2</sub> Methylamine | log <sub>2</sub> Methanol | log <sub>2</sub> Sc Sum | log <sub>2</sub> Ratio | Regulation                                    | q-value  | log <sub>2</sub> Methylamine | log <sub>2</sub> Methanol | log <sub>2</sub> PI Sum | log <sub>2</sub> Ratio | Consensus |                   |  |                        |
| <b>MFLA0661</b> |                                                                                                                                                           | 2.521                        | 1.931                     | 3.256                   | 0.589                  | Y ●● Y                                        |          | 22.472                       | 21.625                    | 23.110                  | 0.847                  | Y ●       |                   |  |                        |
|                 | <i>hypothetical protein [Methylobacillus flagellatus KT]637937561 YP_544772</i>                                                                           |                              |                           |                         |                        |                                               |          |                              |                           |                         |                        |           |                   |  |                        |
| <b>MFLA0662</b> |                                                                                                                                                           | 2.983                        | 4.562                     | 4.979                   | -0.537                 | Y ●● Y                                        | 2.59 E-2 | 19.395                       | 21.526                    | 21.822                  | -1.130                 | Y ●       |                   |  |                        |
|                 | <i>hypothetical protein [Methylobacillus flagellatus KT]637937562 YP_544773</i>                                                                           |                              |                           |                         |                        |                                               |          |                              |                           |                         |                        |           |                   |  |                        |
| <b>MFLA0663</b> |                                                                                                                                                           | 2.674                        | 0.931                     | 3.051                   | 0.736                  | Y ●● Y                                        | 1.4 E-1  | 20.826                       | 19.516                    | 21.315                  | 0.287                  | Y ●       |                   |  |                        |
|                 | <i>phospholipase D/Transphosphatidylase [Methylobacillus flagellatus KT]637937563 YP_544774</i>                                                           |                              |                           |                         |                        |                                               |          |                              |                           |                         |                        |           |                   |  |                        |
| <b>MFLA0664</b> | 0                                                                                                                                                         | 7.415                        | 8.463                     | 9.032                   | -1.027                 | G ●● Y                                        | 1.17 E-1 | 28.414                       | 28.185                    | 29.304                  | 0.220                  | Y ●       |                   |  |                        |
|                 | <i>hypothetical protein [Methylobacillus flagellatus KT]637937564 YP_544775</i>                                                                           |                              |                           |                         |                        |                                               |          |                              |                           |                         |                        |           |                   |  |                        |
| <b>MFLA0665</b> |                                                                                                                                                           | 4.277                        | 4.324                     | 5.301                   | -0.071                 | Y ●● Y                                        | 1.55 E-1 | 22.593                       | 22.923                    | 23.767                  | -0.454                 | Y ●       |                   |  |                        |
|                 | <i>diguanylate cyclase/phosphodiesterase (GGDEF &amp; EAL domains) with PAS/PAC and GAF sensor(s) [Methylobacillus flagellatus KT]637937565 YP_544776</i> |                              |                           |                         |                        |                                               |          |                              |                           |                         |                        |           |                   |  |                        |
| <b>MFLA0666</b> |                                                                                                                                                           | 0.000                        | 0.000                     |                         |                        | ●●                                            |          | 0.000                        | 0.000                     |                         |                        | ●         |                   |  |                        |
|                 | <i>hypothetical protein [Methylobacillus flagellatus KT]637937566 YP_544777</i>                                                                           |                              |                           |                         |                        |                                               |          |                              |                           |                         |                        |           |                   |  |                        |
| <b>MFLA0667</b> |                                                                                                                                                           | 2.328                        | 2.659                     | 3.503                   | 0.701                  | Y ●● Y                                        | 5.68 E-2 | 19.650                       | 21.834                    | 22.121                  | -1.176                 | Y ●       |                   |  |                        |
|                 | <i>GAF sensor hybrid histidine kinase [Methylobacillus flagellatus KT]637937567 YP_544778</i>                                                             |                              |                           |                         |                        |                                               |          |                              |                           |                         |                        |           |                   |  |                        |
| <b>MFLA0668</b> |                                                                                                                                                           | 0.000                        | 0.000                     |                         |                        | ●●                                            |          | 0.000                        | 0.000                     |                         |                        | ●         |                   |  |                        |
|                 | <i>hypothetical protein [Methylobacillus flagellatus KT]637937568 YP_544779</i>                                                                           |                              |                           |                         |                        |                                               |          |                              |                           |                         |                        |           |                   |  |                        |
| <b>MFLA0669</b> |                                                                                                                                                           | 0.000                        | 0.000                     |                         |                        | ●●                                            |          | 0.000                        | 0.000                     |                         |                        | ●         |                   |  |                        |
|                 | <i>[Methylobacillus flagellatus KT]639329601</i>                                                                                                          |                              |                           |                         |                        |                                               |          |                              |                           |                         |                        |           |                   |  |                        |
| <b>MFLA0671</b> |                                                                                                                                                           | 0.000                        | 0.000                     |                         |                        | ●●                                            |          | 0.000                        | 0.000                     |                         |                        | ●         |                   |  |                        |
|                 | <i>hypothetical protein [Methylobacillus flagellatus KT]637937570 YP_544780</i>                                                                           |                              |                           |                         |                        |                                               |          |                              |                           |                         |                        |           |                   |  |                        |
| <b>MFLA0672</b> |                                                                                                                                                           | 0.000                        | 0.000                     |                         |                        | ●●                                            |          | 0.000                        | 0.000                     |                         |                        | ●         |                   |  |                        |
|                 | <i>hypothetical protein [Methylobacillus flagellatus KT]637937571 YP_544781</i>                                                                           |                              |                           |                         |                        |                                               |          |                              |                           |                         |                        |           |                   |  |                        |
| <b>MFLA0673</b> |                                                                                                                                                           | 0.000                        | 0.000                     |                         |                        | ●●                                            |          | 0.000                        | 0.000                     |                         |                        | ●         |                   |  |                        |
|                 | <i>hypothetical protein [Methylobacillus flagellatus KT]637937572 YP_544782</i>                                                                           |                              |                           |                         |                        |                                               |          |                              |                           |                         |                        |           |                   |  |                        |
| <b>MFLA0674</b> |                                                                                                                                                           | 0.000                        | 0.000                     |                         |                        | ●●                                            |          | 0.000                        | 0.000                     |                         |                        | ●         |                   |  |                        |
|                 | <i>hypothetical protein [Methylobacillus flagellatus KT]637937573 YP_544783</i>                                                                           |                              |                           |                         |                        |                                               |          |                              |                           |                         |                        |           |                   |  |                        |
| <b>MFLA0675</b> | 5.14 E-11                                                                                                                                                 | 6.331                        | 7.296                     | 7.893                   | -0.959                 | G ●● Y                                        | 2.52 E-2 | 25.668                       | 26.786                    | 27.332                  | -1.112                 | G ●       |                   |  |                        |
|                 | <i>hypothetical protein [Methylobacillus flagellatus KT]637937574 YP_544784</i>                                                                           |                              |                           |                         |                        |                                               |          |                              |                           |                         |                        |           |                   |  |                        |
| <b>MFLA0676</b> |                                                                                                                                                           | 3.106                        | 1.915                     | 3.630                   | 2.271                  | Y ●● Y                                        | 2.42 E-2 | 22.042                       | 22.570                    | 23.330                  | 0.472                  | Y ●       |                   |  |                        |
|                 | <i>Aminoacyl-tRNA hydrolase [Methylobacillus flagellatus KT]637937575 YP_544785</i>                                                                       |                              |                           |                         |                        |                                               |          |                              |                           |                         |                        |           |                   |  |                        |
| <b>MFLA0677</b> | 0                                                                                                                                                         | 9.144                        | 9.773                     | 10.492                  | -0.700                 | G ●● G                                        | 4.58 E-3 | 28.364                       | 29.610                    | 30.118                  | -1.249                 | G ●       |                   |  |                        |
|                 | <i>ribosomal 5S rRNA E-loop binding protein Ctc/L25/TL5 [Methylobacillus flagellatus KT]637937576 YP_544786</i>                                           |                              |                           |                         |                        |                                               |          |                              |                           |                         |                        |           |                   |  |                        |
| <b>MFLA0678</b> | 1.81 E-2                                                                                                                                                  | 7.532                        | 7.798                     | 8.671                   | -0.269                 | Y ●● Y                                        | 7.24 E-2 | 26.928                       | 27.343                    | 28.150                  | -0.469                 | Y ●       |                   |  |                        |
|                 | <i>ribose-phosphate pyrophosphokinase [Methylobacillus flagellatus KT]637937577 YP_544787</i>                                                             |                              |                           |                         |                        |                                               |          |                              |                           |                         |                        |           |                   |  |                        |
| <b>MFLA0679</b> |                                                                                                                                                           | 3.482                        | 2.471                     | 4.063                   | 1.009                  | Y ●● Y                                        | 6.85 E-2 | 21.404                       | 21.579                    | 22.494                  | -0.181                 | Y ●       |                   |  |                        |
|                 | <i>4-diphosphocytidyl-2C-methyl-D-erythritol kinase [Methylobacillus flagellatus KT]637937579 YP_544788</i>                                               |                              |                           |                         |                        |                                               |          |                              |                           |                         |                        |           |                   |  |                        |
| <b>MFLA0680</b> |                                                                                                                                                           | 3.571                        | 3.875                     | 4.731                   | -0.188                 | Y ●● Y                                        | 1.89 E-2 | 21.526                       | 23.135                    | 23.544                  | -1.743                 | Y ●       |                   |  |                        |
|                 | <i>outer membrane lipoprotein LolB [Methylobacillus flagellatus KT]637937580 YP_544789</i>                                                                |                              |                           |                         |                        |                                               |          |                              |                           |                         |                        |           |                   |  |                        |
| <b>MFLA0681</b> |                                                                                                                                                           | 8.182                        | 7.911                     | 9.053                   | 0.243                  | Y ●● Y                                        | 1.28 E-1 | 28.000                       | 27.568                    | 28.800                  | 0.350                  | Y ●       |                   |  |                        |
|                 | <i>Tetradricopeptide TPR_2 [Methylobacillus flagellatus KT]637937581 YP_544790</i>                                                                        |                              |                           |                         |                        |                                               |          |                              |                           |                         |                        |           |                   |  |                        |
| <b>MFLA0682</b> | 6.25 E-11                                                                                                                                                 | 7.427                        | 6.563                     | 8.059                   | 0.855                  | R ●● Y                                        | 1.75 E-2 | 26.203                       | 24.641                    | 26.624                  | 1.599                  | R ●       |                   |  |                        |
|                 | <i>ABC transporter related [Methylobacillus flagellatus KT]637937582 YP_544791</i>                                                                        |                              |                           |                         |                        |                                               |          |                              |                           |                         |                        |           |                   |  |                        |
| <b>MFLA0683</b> |                                                                                                                                                           | 0.000                        | 0.000                     |                         |                        | ●●                                            |          | 0.000                        | 0.000                     |                         |                        | ●         |                   |  |                        |
|                 | <i>" ABC transporter, permease protein, putative [Methylobacillus flagellatus KT]637937583 YP_544792 ""</i>                                               |                              |                           |                         |                        |                                               |          |                              |                           |                         |                        |           |                   |  |                        |



| ORF             | AM/OH <i>M. Flagellatus</i> Spectral Count                                                                                |                              |                           |                         |                        | AM/OH <i>M. Flagellatus</i> Protein Intensity |          |                              |                           |                         | Spectral Count         |           | Protein Intensity |  | Log <sub>2</sub> Ratio |
|-----------------|---------------------------------------------------------------------------------------------------------------------------|------------------------------|---------------------------|-------------------------|------------------------|-----------------------------------------------|----------|------------------------------|---------------------------|-------------------------|------------------------|-----------|-------------------|--|------------------------|
|                 | q-value                                                                                                                   | log <sub>2</sub> Methylamine | log <sub>2</sub> Methanol | log <sub>2</sub> Sc Sum | log <sub>2</sub> Ratio | Regulation                                    | q-value  | log <sub>2</sub> Methylamine | log <sub>2</sub> Methanol | log <sub>2</sub> PI Sum | log <sub>2</sub> Ratio | Consensus |                   |  |                        |
| <b>MFLA0684</b> | 8.46 E-11                                                                                                                 | 6.421                        | 5.005                     | 6.880                   | 1.407                  | R ●● Y                                        | 7.8 E-2  | 26.839                       | 25.973                    | 27.470                  | 1.002                  | R ●●      |                   |  |                        |
|                 | <i>hypothetical protein [Methylobacillus flagellatus KT]637937584 YP_544793</i>                                           |                              |                           |                         |                        |                                               |          |                              |                           |                         |                        |           |                   |  |                        |
| <b>MFLA0685</b> |                                                                                                                           | 5.153                        | 4.264                     | 5.776                   | 0.936                  | Y ●● Y                                        | 9.44 E-2 | 24.032                       | 22.593                    | 24.485                  | 1.139                  | Y ●●      |                   |  |                        |
|                 | <i>hypothetical protein [Methylobacillus flagellatus KT]637937585 YP_544794</i>                                           |                              |                           |                         |                        |                                               |          |                              |                           |                         |                        |           |                   |  |                        |
| <b>MFLA0686</b> |                                                                                                                           | 2.328                        | 0.000                     | 2.590                   | 2.328                  | Y ●● Y                                        |          | 21.006                       | 19.346                    | 21.403                  | 1.660                  | Y ●●      |                   |  |                        |
|                 | <i>formamidopyrimidine-DNA glycosylase [Methylobacillus flagellatus KT]637937586 YP_544795</i>                            |                              |                           |                         |                        |                                               |          |                              |                           |                         |                        |           |                   |  |                        |
| <b>MFLA0687</b> |                                                                                                                           | 0.521                        |                           | 0.521                   |                        | Y ●● Y                                        |          | 18.571                       |                           | 18.571                  |                        | Y ●●      |                   |  |                        |
|                 | <i>" ATPase associated with various cellular activities, AAA_3 [Methylobacillus flagellatus KT]637937587 YP_544796 ""</i> |                              |                           |                         |                        |                                               |          |                              |                           |                         |                        |           |                   |  |                        |
| <b>MFLA0688</b> |                                                                                                                           | 0.000                        | 0.000                     |                         |                        | ●●                                            |          | 0.000                        | 0.000                     |                         |                        | ●●        |                   |  |                        |
|                 | <i>hypothetical protein [Methylobacillus flagellatus KT]637937588 YP_544797</i>                                           |                              |                           |                         |                        |                                               |          |                              |                           |                         |                        |           |                   |  |                        |
| <b>MFLA0689</b> |                                                                                                                           | 0.000                        | 0.000                     |                         |                        | ●●                                            |          | 0.000                        | 0.000                     |                         |                        | ●●        |                   |  |                        |
|                 | <i>" MxaA protein, putative [Methylobacillus flagellatus KT]637937589 YP_544798 ""</i>                                    |                              |                           |                         |                        |                                               |          |                              |                           |                         |                        |           |                   |  |                        |
| <b>MFLA0690</b> |                                                                                                                           | 0.000                        | 0.000                     |                         |                        | ●●                                            |          | 0.000                        | 0.000                     |                         |                        | ●●        |                   |  |                        |
|                 | <i>" von Willebrand factor, type A [Methylobacillus flagellatus KT]637937590 YP_544799 ""</i>                             |                              |                           |                         |                        |                                               |          |                              |                           |                         |                        |           |                   |  |                        |
| <b>MFLA0691</b> |                                                                                                                           | 0.000                        | 0.000                     |                         |                        | ●●                                            |          | 0.000                        | 0.000                     |                         |                        | ●●        |                   |  |                        |
|                 | <i>hypothetical protein [Methylobacillus flagellatus KT]637937591 YP_544800</i>                                           |                              |                           |                         |                        |                                               |          |                              |                           |                         |                        |           |                   |  |                        |
| <b>MFLA0692</b> |                                                                                                                           | 0.521                        | 2.170                     | 2.569                   | -1.649                 | Y ●● Y                                        |          | 18.361                       | 20.064                    | 20.451                  | -1.703                 | Y ●●      |                   |  |                        |
|                 | <i>" von Willebrand factor, type A [Methylobacillus flagellatus KT]637937592 YP_544801 ""</i>                             |                              |                           |                         |                        |                                               |          |                              |                           |                         |                        |           |                   |  |                        |
| <b>MFLA0693</b> |                                                                                                                           | 0.000                        | 0.000                     |                         |                        | ●●                                            |          | 0.000                        | 0.000                     |                         |                        | ●●        |                   |  |                        |
|                 | <i>" transcriptional regulator, MerR family [Methylobacillus flagellatus KT]637937593 YP_544802 ""</i>                    |                              |                           |                         |                        |                                               |          |                              |                           |                         |                        |           |                   |  |                        |
| <b>MFLA0694</b> |                                                                                                                           | 0.000                        | 0.000                     |                         |                        | ●●                                            |          | 0.000                        | 0.000                     |                         |                        | ●●        |                   |  |                        |
|                 | <i>Co/Zn/Cd efflux system component [Methylobacillus flagellatus KT]637937594 YP_544803</i>                               |                              |                           |                         |                        |                                               |          |                              |                           |                         |                        |           |                   |  |                        |
| <b>MFLA0695</b> |                                                                                                                           | 0.000                        | 0.000                     |                         |                        | ●●                                            |          | 0.000                        | 0.000                     |                         |                        | ●●        |                   |  |                        |
|                 | <i>Na<sup>+</sup>/solute symporter [Methylobacillus flagellatus KT]637937595 YP_544804</i>                                |                              |                           |                         |                        |                                               |          |                              |                           |                         |                        |           |                   |  |                        |
| <b>MFLA0696</b> | 1.06 E-1                                                                                                                  | 4.899                        | 4.993                     | 5.947                   | -0.077                 | Y ●● Y                                        | 2.64 E-1 | 24.090                       | 24.144                    | 25.117                  | -0.246                 | Y ●●      |                   |  |                        |
|                 | <i>2-polypropenylphenol 6-hydroxylase [Methylobacillus flagellatus KT]637937596 YP_544805</i>                             |                              |                           |                         |                        |                                               |          |                              |                           |                         |                        |           |                   |  |                        |
| <b>MFLA0697</b> |                                                                                                                           | 3.692                        | 3.372                     | 4.541                   | 0.321                  | Y ●● Y                                        | 1.87 E-1 | 21.608                       | 21.430                    | 22.522                  | 0.150                  | Y ●●      |                   |  |                        |
|                 | <i>protein of unknown function DUF1243 [Methylobacillus flagellatus KT]637937597 YP_544806</i>                            |                              |                           |                         |                        |                                               |          |                              |                           |                         |                        |           |                   |  |                        |
| <b>MFLA0698</b> | 8.72 E-2                                                                                                                  | 6.374                        | 6.108                     | 7.247                   | 0.261                  | Y ●● G                                        | 9.51 E-3 | 24.152                       | 25.104                    | 25.705                  | -0.969                 | Y ●●      |                   |  |                        |
|                 | <i>ubiquinone/menaquinone biosynthesis methyltransferases [Methylobacillus flagellatus KT]637937598 YP_544807</i>         |                              |                           |                         |                        |                                               |          |                              |                           |                         |                        |           |                   |  |                        |
| <b>MFLA0699</b> |                                                                                                                           |                              | 1.585                     | 1.585                   |                        | Y ●● Y                                        |          |                              | 20.959                    | 20.959                  |                        | Y ●●      |                   |  |                        |
|                 | <i>protein of unknown function DUF971 [Methylobacillus flagellatus KT]637937599 YP_544808</i>                             |                              |                           |                         |                        |                                               |          |                              |                           |                         |                        |           |                   |  |                        |
| <b>MFLA0700</b> | 4.36 E-2                                                                                                                  | 6.568                        | 6.643                     | 7.606                   | -0.048                 | Y ●● Y                                        | 7.52 E-2 | 25.646                       | 26.026                    | 26.849                  | -0.367                 | Y ●●      |                   |  |                        |
|                 | <i>hypothetical protein [Methylobacillus flagellatus KT]637937600 YP_544809</i>                                           |                              |                           |                         |                        |                                               |          |                              |                           |                         |                        |           |                   |  |                        |
| <b>MFLA0701</b> |                                                                                                                           | 0.000                        | 0.000                     |                         |                        | ●●                                            |          | 0.000                        | 0.000                     |                         |                        | ●●        |                   |  |                        |
|                 | <i>" cytochrome oxidase maturation protein, cbb3-type [Methylobacillus flagellatus KT]637937601 YP_544810 ""</i>          |                              |                           |                         |                        |                                               |          |                              |                           |                         |                        |           |                   |  |                        |
| <b>MFLA0702</b> |                                                                                                                           | 0.000                        | 0.000                     |                         |                        | ●●                                            |          | 0.000                        | 0.000                     |                         |                        | ●●        |                   |  |                        |
|                 | <i>sigma 32 (RpoH) [Methylobacillus flagellatus KT]637937602 YP_544811</i>                                                |                              |                           |                         |                        |                                               |          |                              |                           |                         |                        |           |                   |  |                        |
| <b>MFLA0703</b> |                                                                                                                           | 0.000                        | 0.000                     |                         |                        | ●●                                            |          | 0.000                        | 0.000                     |                         |                        | ●●        |                   |  |                        |
|                 | <i>hypothetical protein [Methylobacillus flagellatus KT]637937603 YP_544812</i>                                           |                              |                           |                         |                        |                                               |          |                              |                           |                         |                        |           |                   |  |                        |
| <b>MFLA0704</b> |                                                                                                                           | 0.000                        | 0.000                     |                         |                        | ●●                                            |          | 0.000                        | 0.000                     |                         |                        | ●●        |                   |  |                        |
|                 | <i>protein of unknown function DUF214 [Methylobacillus flagellatus KT]637937604 YP_544813</i>                             |                              |                           |                         |                        |                                               |          |                              |                           |                         |                        |           |                   |  |                        |
| <b>MFLA0705</b> |                                                                                                                           | 0.000                        | 0.000                     |                         |                        | ●●                                            |          | 0.000                        | 0.000                     |                         |                        | ●●        |                   |  |                        |
|                 | <i>ABC transporter related [Methylobacillus flagellatus KT]637937605 YP_544814</i>                                        |                              |                           |                         |                        |                                               |          |                              |                           |                         |                        |           |                   |  |                        |

| ORF             | AM/OH <i>M. Flagellatus</i> Spectral Count                                                                                   |                      |                   |                 |                 |            | AM/OH <i>M. Flagellatus</i> Protein Intensity |                      |                   |                 |                 |                        | Consensus | Spectral Count |   | Protein Intensity |  |
|-----------------|------------------------------------------------------------------------------------------------------------------------------|----------------------|-------------------|-----------------|-----------------|------------|-----------------------------------------------|----------------------|-------------------|-----------------|-----------------|------------------------|-----------|----------------|---|-------------------|--|
|                 | $q$ -value                                                                                                                   | $\log_2$ Methylamine | $\log_2$ Methanol | $\log_2$ Sc Sum | $\log_2$ -Ratio | Regulation | $q$ -value                                    | $\log_2$ Methylamine | $\log_2$ Methanol | $\log_2$ PI Sum | $\log_2$ -Ratio | Log <sub>2</sub> Ratio |           | -7             | 0 | 7                 |  |
| <b>MFLA0706</b> |                                                                                                                              | 0.000                | 0.000             |                 |                 |            |                                               | 0.000                | 0.000             |                 |                 |                        |           |                |   |                   |  |
|                 | <i>hypothetical protein [Methylobacillus flagellatus KT]637937606 YP_544815</i>                                              |                      |                   |                 |                 |            |                                               |                      |                   |                 |                 |                        |           |                |   |                   |  |
| <b>MFLA0707</b> |                                                                                                                              | 0.000                | 0.000             |                 |                 |            |                                               | 0.000                | 0.000             |                 |                 |                        |           |                |   |                   |  |
|                 | <i>zinc/iron permease [Methylobacillus flagellatus KT]637937607 YP_544816</i>                                                |                      |                   |                 |                 |            |                                               |                      |                   |                 |                 |                        |           |                |   |                   |  |
| <b>MFLA0708</b> |                                                                                                                              | 0.000                | 0.000             |                 |                 |            |                                               | 0.000                | 0.000             |                 |                 |                        |           |                |   |                   |  |
|                 | <i>" TonB-dependent receptor, plug [Methylobacillus flagellatus KT]637937608 YP_544817 ""</i>                                |                      |                   |                 |                 |            |                                               |                      |                   |                 |                 |                        |           |                |   |                   |  |
| <b>MFLA0709</b> |                                                                                                                              | 0.000                | 0.000             |                 |                 |            |                                               | 0.000                | 0.000             |                 |                 |                        |           |                |   |                   |  |
|                 | <i>hypothetical protein [Methylobacillus flagellatus KT]637937609 YP_544818</i>                                              |                      |                   |                 |                 |            |                                               |                      |                   |                 |                 |                        |           |                |   |                   |  |
| <b>MFLA0710</b> |                                                                                                                              | 0.000                | 0.000             |                 |                 |            |                                               | 0.000                | 0.000             |                 |                 |                        |           |                |   |                   |  |
|                 | <i>hypothetical protein [Methylobacillus flagellatus KT]637937610 YP_544819</i>                                              |                      |                   |                 |                 |            |                                               |                      |                   |                 |                 |                        |           |                |   |                   |  |
| <b>MFLA0711</b> |                                                                                                                              | 0.000                | 0.000             |                 |                 |            |                                               | 0.000                | 0.000             |                 |                 |                        |           |                |   |                   |  |
|                 | <i>hypothetical protein [Methylobacillus flagellatus KT]637937611 YP_544820</i>                                              |                      |                   |                 |                 |            |                                               |                      |                   |                 |                 |                        |           |                |   |                   |  |
| <b>MFLA0712</b> |                                                                                                                              | 0.000                | 0.000             |                 |                 |            |                                               | 0.000                | 0.000             |                 |                 |                        |           |                |   |                   |  |
|                 | <i>hypothetical protein [Methylobacillus flagellatus KT]637937612 YP_544821</i>                                              |                      |                   |                 |                 |            |                                               |                      |                   |                 |                 |                        |           |                |   |                   |  |
| <b>MFLA0713</b> | 2.983                                                                                                                        | 4.385                | 4.848             | -0.386          | Y               | ●          | ●                                             | Y                    | 1.2 E-1           | 18.591          | 20.829          | 21.106                 | -1.112    | Y              | ● |                   |  |
|                 | <i>hypothetical protein [Methylobacillus flagellatus KT]637937613 YP_544822</i>                                              |                      |                   |                 |                 |            |                                               |                      |                   |                 |                 |                        |           |                |   |                   |  |
| <b>MFLA0714</b> | 2.746                                                                                                                        | 1.585                | 3.279             | -0.126          | Y               | ●          | ●                                             | Y                    | 1.08 E-2          | 21.777          | 22.915          | 23.456                 | -2.139    | Y              | ● |                   |  |
|                 | <i>" protein of unknown function DUF861, cupin_3 [Methylobacillus flagellatus KT]637937614 YP_544823 ""</i>                  |                      |                   |                 |                 |            |                                               |                      |                   |                 |                 |                        |           |                |   |                   |  |
| <b>MFLA0715</b> | 1.521                                                                                                                        | 1.769                | 2.650             | 0.762           | Y               | ●          | ●                                             | Y                    | 1.26 E-1          | 19.033          | 20.790          | 21.164                 | -0.684    | Y              | ● |                   |  |
|                 | <i>periplasmic sensor signal transduction histidine kinase [Methylobacillus flagellatus KT]637937615 YP_544824</i>           |                      |                   |                 |                 |            |                                               |                      |                   |                 |                 |                        |           |                |   |                   |  |
| <b>MFLA0716</b> | 4.306                                                                                                                        | 3.147                | 4.840             | 1.199           | Y               | ●          | ●                                             | Y                    | 2.51 E-2          | 21.257          | 21.734          | 22.515                 | -0.484    | Y              | ● |                   |  |
|                 | <i>" two component transcriptional regulator, winged helix family [Methylobacillus flagellatus KT]637937616 YP_544825 ""</i> |                      |                   |                 |                 |            |                                               |                      |                   |                 |                 |                        |           |                |   |                   |  |
| <b>MFLA0717</b> |                                                                                                                              | 0.000                | 0.000             |                 |                 |            |                                               | 0.000                | 0.000             |                 |                 |                        |           |                |   |                   |  |
|                 | <i>hypothetical protein [Methylobacillus flagellatus KT]637937617 YP_544826</i>                                              |                      |                   |                 |                 |            |                                               |                      |                   |                 |                 |                        |           |                |   |                   |  |
| <b>MFLA0718</b> |                                                                                                                              | 2.621                |                   | 2.621           |                 | Y          | ●                                             | ●                    | Y                 | 21.957          |                 | 21.957                 |           | Y              | ● |                   |  |
|                 | <i>putative NAD-dependent formate dehydrogenase delta subunit [Methylobacillus flagellatus KT]637937618 YP_544827</i>        |                      |                   |                 |                 |            |                                               |                      |                   |                 |                 |                        |           |                |   |                   |  |
| <b>MFLA0719</b> |                                                                                                                              | 0.000                | 0.000             |                 |                 |            |                                               | 0.000                | 0.000             |                 |                 |                        |           |                |   |                   |  |
|                 | <i>formate dehydrogenase family accessory protein FdhD [Methylobacillus flagellatus KT]637937619 YP_544828</i>               |                      |                   |                 |                 |            |                                               |                      |                   |                 |                 |                        |           |                |   |                   |  |
| <b>MFLA0720</b> |                                                                                                                              | 6.738                |                   | 6.738           |                 | Y          | ●                                             | ●                    | Y                 | 25.869          |                 | 25.869                 |           | Y              | ● |                   |  |
|                 | <i>" formate dehydrogenase, alpha subunit [Methylobacillus flagellatus KT]637937620 YP_544829 ""</i>                         |                      |                   |                 |                 |            |                                               |                      |                   |                 |                 |                        |           |                |   |                   |  |
| <b>MFLA0721</b> |                                                                                                                              | 6.692                |                   | 6.692           |                 | Y          | ●                                             | ●                    | Y                 | 24.631          |                 | 24.631                 |           | Y              | ● |                   |  |
|                 | <i>NADH dehydrogenase (quinone) [Methylobacillus flagellatus KT]637937621 YP_544830</i>                                      |                      |                   |                 |                 |            |                                               |                      |                   |                 |                 |                        |           |                |   |                   |  |
| <b>MFLA0722</b> |                                                                                                                              | 1.398                |                   | 1.398           |                 | Y          | ●                                             | ●                    | Y                 | 21.744          |                 | 21.744                 |           | Y              | ● |                   |  |
|                 | <i>" NADH dehydrogenase (ubiquinone), 24 kDa subunit [Methylobacillus flagellatus KT]637937622 YP_544831 ""</i>              |                      |                   |                 |                 |            |                                               |                      |                   |                 |                 |                        |           |                |   |                   |  |
| <b>MFLA0723</b> | 2.82 E-7                                                                                                                     | 6.204                | 6.942             | 7.619           | -0.785          | G          | ●                                             | ●                    | Y                 | 1.01 E-2        | 25.001          | 26.676                 | 27.069    | -1.739         | G | ●                 |  |
|                 | <i>FAD linked oxidase-like protein [Methylobacillus flagellatus KT]637937623 YP_544832</i>                                   |                      |                   |                 |                 |            |                                               |                      |                   |                 |                 |                        |           |                |   |                   |  |
| <b>MFLA0724</b> | 5.76 E-5                                                                                                                     | 8.973                | 9.236             | 10.110          | -0.259          | Y          | ●                                             | ●                    | Y                 | 2.74 E-2        | 27.853          | 28.160                 | 29.015    | -0.305         | Y | ●                 |  |
|                 | <i>" D-isomer specific 2-hydroxyacid dehydrogenase, NAD-binding [Methylobacillus flagellatus KT]637937624 YP_544833 ""</i>   |                      |                   |                 |                 |            |                                               |                      |                   |                 |                 |                        |           |                |   |                   |  |
| <b>MFLA0725</b> | 5.74 E-2                                                                                                                     | 6.104                | 5.737             | 6.932           | 0.359           | Y          | ●                                             | ●                    | Y                 | 6.15 E-2        | 24.951          | 25.354                 | 26.167    | -0.391         | Y | ●                 |  |
|                 | <i>Electron-transferring-flavoprotein dehydrogenase [Methylobacillus flagellatus KT]637937625 YP_544834</i>                  |                      |                   |                 |                 |            |                                               |                      |                   |                 |                 |                        |           |                |   |                   |  |
| <b>MFLA0726</b> |                                                                                                                              | 3.221                | 1.807             | 3.681           | 1.414           | Y          | ●                                             | ●                    | Y                 | 21.266          | 19.965          | 21.758                 | 1.302     | Y              | ● |                   |  |
|                 | <i>" transcriptional regulator, LysR family [Methylobacillus flagellatus KT]637937626 YP_544835 ""</i>                       |                      |                   |                 |                 |            |                                               |                      |                   |                 |                 |                        |           |                |   |                   |  |
| <b>MFLA0727</b> | 3.57 E-2                                                                                                                     | 7.477                | 7.662             | 8.572           | -0.192          | Y          | ●                                             | ●                    | Y                 | 1.53 E-2        | 27.076          | 27.707                 | 28.426    | -0.648         | Y | ●                 |  |
|                 | <i>electron transfer flavoprotein beta-subunit [Methylobacillus flagellatus KT]637937627 YP_544836</i>                       |                      |                   |                 |                 |            |                                               |                      |                   |                 |                 |                        |           |                |   |                   |  |

| ORF             | AM/OH <i>M. Flagellatus</i> Spectral Count                                                                  |                     |                   |                 |                |            | AM/OH <i>M. Flagellatus</i> Protein Intensity |                     |                   |                 |                |                        | Consensus | Spectral Count |   | Protein Intensity |  |
|-----------------|-------------------------------------------------------------------------------------------------------------|---------------------|-------------------|-----------------|----------------|------------|-----------------------------------------------|---------------------|-------------------|-----------------|----------------|------------------------|-----------|----------------|---|-------------------|--|
|                 | $q$ -value                                                                                                  | $\log_2$ Methyamine | $\log_2$ Methanol | $\log_2$ Sc Sum | $\log_2$ Ratio | Regulation | $q$ -value                                    | $\log_2$ Methyamine | $\log_2$ Methanol | $\log_2$ PI Sum | $\log_2$ Ratio | Log <sub>2</sub> Ratio |           | -7             | 0 | 7                 |  |
| <b>MFLA0728</b> | 7.15 E-8                                                                                                    | 7.459               | 6.710             | 8.133           | 0.749          | R ●●● Y    | 3.47 E-2                                      | 25.407              | 26.615            | 27.134          | -1.436         | Y ●●                   |           |                |   |                   |  |
|                 | "electron transfer flavoprotein, alpha subunit [Methylobacillus flagellatus KT]637937628 YP_544837 ""       |                     |                   |                 |                |            |                                               |                     |                   |                 |                |                        |           |                |   |                   |  |
| <b>MFLA0729</b> | 2.76 E-5                                                                                                    | 6.381               | 7.041             | 7.748           | -0.671         | G ●●● Y    | 1.1 E-2                                       | 26.766              | 27.815            | 28.384          | -1.059         | G ●●                   |           |                |   |                   |  |
|                 | Oxidoreductase FAD-binding region [Methylobacillus flagellatus KT]637937629 YP_544838                       |                     |                   |                 |                |            |                                               |                     |                   |                 |                |                        |           |                |   |                   |  |
| <b>MFLA0730</b> | 0.000                                                                                                       | 0.000               |                   |                 |                | ●●         |                                               | 0.000               | 0.000             |                 |                | ●●                     |           |                |   |                   |  |
|                 | hypothetical protein [Methylobacillus flagellatus KT]637937630 YP_544839                                    |                     |                   |                 |                |            |                                               |                     |                   |                 |                |                        |           |                |   |                   |  |
| <b>MFLA0731</b> | 1.843                                                                                                       |                     |                   | 1.843           |                | Y ●●● Y    |                                               | 19.034              |                   | 19.034          |                | Y ●●                   |           |                |   |                   |  |
|                 | protein of unknown function DUF214 [Methylobacillus flagellatus KT]637937631 YP_544840                      |                     |                   |                 |                |            |                                               |                     |                   |                 |                |                        |           |                |   |                   |  |
| <b>MFLA0732</b> |                                                                                                             | 2.505               | 2.505             |                 |                | Y ●●● Y    |                                               |                     | 22.113            | 22.113          |                | Y ●●                   |           |                |   |                   |  |
|                 | ABC transporter related [Methylobacillus flagellatus KT]637937632 YP_544841                                 |                     |                   |                 |                |            |                                               |                     |                   |                 |                |                        |           |                |   |                   |  |
| <b>MFLA0733</b> | 1.33 E-1                                                                                                    | 5.801               | 5.986             | 6.897           | -0.184         | Y ●●● Y    | 5.91 E-2                                      | 25.166              | 25.424            | 26.301          | -0.260         | Y ●●                   |           |                |   |                   |  |
|                 | signal recognition particle-docking protein FtsY [Methylobacillus flagellatus KT]637937633 YP_544842        |                     |                   |                 |                |            |                                               |                     |                   |                 |                |                        |           |                |   |                   |  |
| <b>MFLA0734</b> | 1.14 E-2                                                                                                    | 7.657               | 7.757             | 8.708           | -0.099         | Y ●●● Y    | 1.98 E-1                                      | 27.373              | 27.199            | 28.289          | 0.084          | Y ●●                   |           |                |   |                   |  |
|                 | peptidase M16-like protein [Methylobacillus flagellatus KT]637937634 YP_544843                              |                     |                   |                 |                |            |                                               |                     |                   |                 |                |                        |           |                |   |                   |  |
| <b>MFLA0735</b> |                                                                                                             | 7.491               | 6.954             | 8.247           | 0.687          | Y ●●● Y    | 8.26 E-2                                      | 27.164              | 26.740            | 27.968          | 0.452          | Y ●●                   |           |                |   |                   |  |
|                 | peptidase M16-like protein [Methylobacillus flagellatus KT]637937635 YP_544844                              |                     |                   |                 |                |            |                                               |                     |                   |                 |                |                        |           |                |   |                   |  |
| <b>MFLA0736</b> |                                                                                                             | 2.210               | 2.254             | 3.232           | 0.090          | Y ●●● Y    | 2.05 E-2                                      | 20.651              | 21.930            | 22.428          | -1.318         | Y ●●                   |           |                |   |                   |  |
|                 | conserved hypothetical protein 95 [Methylobacillus flagellatus KT]637937636 YP_544845                       |                     |                   |                 |                |            |                                               |                     |                   |                 |                |                        |           |                |   |                   |  |
| <b>MFLA0737</b> |                                                                                                             | 4.542               | 4.194             | 5.378           | 0.350          | Y ●●● Y    | 4.87 E-2                                      | 23.310              | 23.962            | 24.672          | -0.688         | Y ●●                   |           |                |   |                   |  |
|                 | Coenzyme A biosynthesis protein [Methylobacillus flagellatus KT]637937637 YP_544846                         |                     |                   |                 |                |            |                                               |                     |                   |                 |                |                        |           |                |   |                   |  |
| <b>MFLA0738</b> |                                                                                                             | 0.000               | 0.000             |                 |                | ●●         |                                               | 0.000               | 0.000             |                 |                | ●●                     |           |                |   |                   |  |
|                 | "4Fe-4S ferredoxin, iron-sulfur binding [Methylobacillus flagellatus KT]637937638 YP_544847 ""              |                     |                   |                 |                |            |                                               |                     |                   |                 |                |                        |           |                |   |                   |  |
| <b>MFLA0739</b> |                                                                                                             | 2.691               | 2.154             | 3.447           | 0.537          | Y ●●● Y    |                                               | 22.209              | 21.167            | 22.780          | 1.042          | Y ●●                   |           |                |   |                   |  |
|                 | Glyoxalase I [Methylobacillus flagellatus KT]637937639 YP_544848                                            |                     |                   |                 |                |            |                                               |                     |                   |                 |                |                        |           |                |   |                   |  |
| <b>MFLA0740</b> |                                                                                                             | 5.487               | 5.459             | 6.473           | -0.166         | Y ●●● Y    | 1.43 E-1                                      | 24.107              | 24.314            | 25.214          | -0.247         | Y ●●                   |           |                |   |                   |  |
|                 | Phosphate acetyltransferase [Methylobacillus flagellatus KT]637937640 YP_544849                             |                     |                   |                 |                |            |                                               |                     |                   |                 |                |                        |           |                |   |                   |  |
| <b>MFLA0741</b> |                                                                                                             | 0.000               | 0.000             |                 |                | ●●         |                                               | 0.000               | 0.000             |                 |                | ●●                     |           |                |   |                   |  |
|                 | acetate kinase [Methylobacillus flagellatus KT]637937641 YP_544850                                          |                     |                   |                 |                |            |                                               |                     |                   |                 |                |                        |           |                |   |                   |  |
| <b>MFLA0742</b> |                                                                                                             | 2.996               | 3.453             | 4.243           | -0.438         | Y ●●● Y    | 1.59 E-2                                      | 22.855              | 23.878            | 24.455          | -1.020         | Y ●●                   |           |                |   |                   |  |
|                 | secretion protein HlyD [Methylobacillus flagellatus KT]637937642 YP_544851                                  |                     |                   |                 |                |            |                                               |                     |                   |                 |                |                        |           |                |   |                   |  |
| <b>MFLA0743</b> |                                                                                                             | 3.259               | 3.941             | 4.640           | -0.667         | G ●●● G    | 4.58 E-3                                      | 21.732              | 23.655            | 23.993          | -1.949         | G ●●                   |           |                |   |                   |  |
|                 | acriflavin resistance protein [Methylobacillus flagellatus KT]637937643 YP_544852                           |                     |                   |                 |                |            |                                               |                     |                   |                 |                |                        |           |                |   |                   |  |
| <b>MFLA0744</b> |                                                                                                             | 3.307               | 1.807             | 3.744           | 0.360          | Y ●●● Y    | 1.25 E-1                                      | 20.860              | 20.605            | 21.738          | -0.952         | Y ●●                   |           |                |   |                   |  |
|                 | acriflavin resistance protein [Methylobacillus flagellatus KT]637937644 YP_544853                           |                     |                   |                 |                |            |                                               |                     |                   |                 |                |                        |           |                |   |                   |  |
| <b>MFLA0745</b> |                                                                                                             | 3.270               |                   | 3.270           |                | Y ●●● Y    |                                               | 21.077              |                   | 21.077          |                | Y ●●                   |           |                |   |                   |  |
|                 | "RND efflux system, outer membrane lipoprotein, NodT [Methylobacillus flagellatus KT]637937645 YP_544854 "" |                     |                   |                 |                |            |                                               |                     |                   |                 |                |                        |           |                |   |                   |  |
| <b>MFLA0746</b> |                                                                                                             | 0.000               | 0.000             |                 |                | ●●         |                                               | 0.000               | 0.000             |                 |                | ●●                     |           |                |   |                   |  |
|                 | Alpha/beta hydrolase fold-3 [Methylobacillus flagellatus KT]637937646 YP_544855                             |                     |                   |                 |                |            |                                               |                     |                   |                 |                |                        |           |                |   |                   |  |
| <b>MFLA0747</b> |                                                                                                             | 0.000               | 0.000             |                 |                | ●●         |                                               | 0.000               | 0.000             |                 |                | ●●                     |           |                |   |                   |  |
|                 | hypothetical protein [Methylobacillus flagellatus KT]637937647 YP_544856                                    |                     |                   |                 |                |            |                                               |                     |                   |                 |                |                        |           |                |   |                   |  |
| <b>MFLA0748</b> | 1.44 E-1                                                                                                    | 5.778               | 5.897             | 6.839           | -0.121         | Y ●●● Y    | 7.33 E-2                                      | 25.048              | 24.897            | 25.975          | 0.157          | Y ●●                   |           |                |   |                   |  |
|                 | 2-isopropylmalate synthase [Methylobacillus flagellatus KT]637937648 YP_544857                              |                     |                   |                 |                |            |                                               |                     |                   |                 |                |                        |           |                |   |                   |  |
| <b>MFLA0749</b> |                                                                                                             | 0.000               | 0.000             |                 |                | ●●         |                                               | 0.000               | 0.000             |                 |                | ●●                     |           |                |   |                   |  |
|                 | Drug resistance transporter Bcr/CfIA subfamily [Methylobacillus flagellatus KT]637937649 YP_544858          |                     |                   |                 |                |            |                                               |                     |                   |                 |                |                        |           |                |   |                   |  |

| ORF             | AM/OH <i>M. Flagellatus</i> Spectral Count                                                                                              |                              |                           |                         |                        | AM/OH <i>M. Flagellatus</i> Protein Intensity |          |                              |                           |                         | Consensus              |       | Spectral Count |    | Protein Intensity |   |  |
|-----------------|-----------------------------------------------------------------------------------------------------------------------------------------|------------------------------|---------------------------|-------------------------|------------------------|-----------------------------------------------|----------|------------------------------|---------------------------|-------------------------|------------------------|-------|----------------|----|-------------------|---|--|
|                 | q-value                                                                                                                                 | log <sub>2</sub> Methylamine | log <sub>2</sub> Methanol | log <sub>2</sub> Sc Sum | log <sub>2</sub> Ratio | Regulation                                    | q-value  | log <sub>2</sub> Methylamine | log <sub>2</sub> Methanol | log <sub>2</sub> PI Sum | log <sub>2</sub> Ratio |       |                | -7 | 0                 | 7 |  |
| <b>MFLA0750</b> | 0                                                                                                                                       | 8.092                        | 7.101                     | 8.680                   | 0.863                  | R ●●● Y                                       | 1.5 E-1  | 26.707                       | 26.403                    | 27.563                  | 0.281                  | R ●●● |                |    |                   |   |  |
|                 | <i>Chaperone DnaJ [Methylobacillus flagellatus KT]637937650 YP_544859</i>                                                               |                              |                           |                         |                        |                                               |          |                              |                           |                         |                        |       |                |    |                   |   |  |
| <b>MFLA0751</b> | 12.166                                                                                                                                  | 11.762                       | 12.978                    | 0.368                   | Y ●●● Y                | 3.48 E-2                                      | 31.708   | 31.136                       | 32.450                    | 0.554                   | Y ●●●                  |       |                |    |                   |   |  |
|                 | <i>Chaperone DnaK [Methylobacillus flagellatus KT]637937651 YP_544860</i>                                                               |                              |                           |                         |                        |                                               |          |                              |                           |                         |                        |       |                |    |                   |   |  |
| <b>MFLA0752</b> | 9.966                                                                                                                                   | 9.466                        | 10.738                    | 0.409                   | Y ●●● Y                | 2.59 E-1                                      | 28.652   | 28.694                       | 29.673                    | -0.133                  | Y ●●●                  |       |                |    |                   |   |  |
|                 | <i>GrpE protein [Methylobacillus flagellatus KT]637937652 YP_544861</i>                                                                 |                              |                           |                         |                        |                                               |          |                              |                           |                         |                        |       |                |    |                   |   |  |
| <b>MFLA0753</b> | 3.259                                                                                                                                   | 4.288                        | 4.863                     | -1.036                  | Y ●●● Y                | 3.09 E-2                                      | 21.650   | 22.728                       | 23.288                    | -1.218                  | Y ●●●                  |       |                |    |                   |   |  |
|                 | <i>Lipopolysaccharide heptosyltransferase I [Methylobacillus flagellatus KT]637937653 YP_544862</i>                                     |                              |                           |                         |                        |                                               |          |                              |                           |                         |                        |       |                |    |                   |   |  |
| <b>MFLA0754</b> | 4.113                                                                                                                                   | 4.341                        | 5.231                     | -0.403                  | Y ●●● Y                | 9.48 E-2                                      | 22.663   | 23.189                       | 23.950                    | -0.689                  | Y ●●●                  |       |                |    |                   |   |  |
|                 | <i>" glycosyl transferase, group 1 [Methylobacillus flagellatus KT]637937654 YP_544863 ""</i>                                           |                              |                           |                         |                        |                                               |          |                              |                           |                         |                        |       |                |    |                   |   |  |
| <b>MFLA0755</b> | 3.571                                                                                                                                   | 3.669                        | 4.621                     | -0.091                  | Y ●●● Y                | 5.88 E-2                                      | 22.900   | 23.146                       | 24.029                    | -0.239                  | Y ●●●                  |       |                |    |                   |   |  |
|                 | <i>lipopolysaccharide kinase [Methylobacillus flagellatus KT]637937655 YP_544864</i>                                                    |                              |                           |                         |                        |                                               |          |                              |                           |                         |                        |       |                |    |                   |   |  |
| <b>MFLA0756</b> | 3.664                                                                                                                                   | 4.132                        | 4.917                     | -0.764                  | Y ●●● Y                | 8.56 E-2                                      | 21.446   | 22.368                       | 22.979                    | -1.743                  | Y ●●●                  |       |                |    |                   |   |  |
|                 | <i>sulfatase [Methylobacillus flagellatus KT]637937656 YP_544865</i>                                                                    |                              |                           |                         |                        |                                               |          |                              |                           |                         |                        |       |                |    |                   |   |  |
| <b>MFLA0757</b> | 3.945                                                                                                                                   | 3.595                        | 4.781                     | 0.320                   | Y ●●● Y                | 8.72 E-2                                      | 25.723   | 23.167                       | 25.950                    | 1.935                   | Y ●●●                  |       |                |    |                   |   |  |
|                 | <i>hypothetical protein [Methylobacillus flagellatus KT]637937657 YP_544866</i>                                                         |                              |                           |                         |                        |                                               |          |                              |                           |                         |                        |       |                |    |                   |   |  |
| <b>MFLA0758</b> | 6.98 E-2                                                                                                                                | 6.201                        | 6.468                     | 7.340                   | -0.277                 | Y ●●● Y                                       | 1.53 E-2 | 25.557                       | 26.129                    | 26.871                  | -0.584                 | Y ●●● |                |    |                   |   |  |
|                 | <i>Carbamoyltransferase [Methylobacillus flagellatus KT]637937658 YP_544867</i>                                                         |                              |                           |                         |                        |                                               |          |                              |                           |                         |                        |       |                |    |                   |   |  |
| <b>MFLA0759</b> | 1.59 E-3                                                                                                                                | 7.885                        | 7.605                     | 8.752                   | 0.271                  | Y ●●● Y                                       | 3.76 E-2 | 27.338                       | 27.792                    | 28.583                  | -0.462                 | Y ●●● |                |    |                   |   |  |
|                 | <i>6-phosphogluconate dehydratase [Methylobacillus flagellatus KT]637937659 YP_544868</i>                                               |                              |                           |                         |                        |                                               |          |                              |                           |                         |                        |       |                |    |                   |   |  |
| <b>MFLA0760</b> | 2.05 E-3                                                                                                                                | 7.049                        | 7.407                     | 8.239                   | -0.371                 | Y ●●● Y                                       | 1.17 E-2 | 28.005                       | 28.606                    | 29.337                  | -0.598                 | Y ●●● |                |    |                   |   |  |
|                 | <i>2-dehydro-3-deoxyphosphogluconate aldolase/4-hydroxy-2-oxoglutarate aldolase [Methylobacillus flagellatus KT]637937660 YP_544869</i> |                              |                           |                         |                        |                                               |          |                              |                           |                         |                        |       |                |    |                   |   |  |
| <b>MFLA0761</b> | 1.521                                                                                                                                   | 1.000                        | 2.284                     | 0.521                   | Y ●●● Y                |                                               | 19.745   | 19.867                       | 20.807                    | -0.122                  | Y ●●●                  |       |                |    |                   |   |  |
|                 | <i>Haloacid dehalogenase-like hydrolase [Methylobacillus flagellatus KT]637937661 YP_544870</i>                                         |                              |                           |                         |                        |                                               |          |                              |                           |                         |                        |       |                |    |                   |   |  |
| <b>MFLA0762</b> | 0.521                                                                                                                                   | 0.000                        | 1.284                     | 0.521                   | Y ●●● Y                |                                               | 21.104   | 20.144                       | 21.702                    | 0.960                   | Y ●●●                  |       |                |    |                   |   |  |
|                 | <i>" toluene tolerance protein, putative [Methylobacillus flagellatus KT]637937662 YP_544871 ""</i>                                     |                              |                           |                         |                        |                                               |          |                              |                           |                         |                        |       |                |    |                   |   |  |
| <b>MFLA0763</b> | 3.221                                                                                                                                   | 4.367                        | 4.905                     | -0.095                  | Y ●●● Y                | 1.17 E-1                                      | 21.799   | 24.344                       | 24.572                    | -1.388                  | Y ●●●                  |       |                |    |                   |   |  |
|                 | <i>" glycosyl transferase, group 1 [Methylobacillus flagellatus KT]637937663 YP_544872 ""</i>                                           |                              |                           |                         |                        |                                               |          |                              |                           |                         |                        |       |                |    |                   |   |  |
| <b>MFLA0764</b> | 4.346                                                                                                                                   | 3.871                        | 5.128                     | 0.286                   | Y ●●● Y                | 1.4 E-1                                       | 23.432   | 23.695                       | 24.570                    | -0.339                  | Y ●●●                  |       |                |    |                   |   |  |
|                 | <i>Methyltransferase FkbM [Methylobacillus flagellatus KT]637937664 YP_544873</i>                                                       |                              |                           |                         |                        |                                               |          |                              |                           |                         |                        |       |                |    |                   |   |  |
| <b>MFLA0765</b> | 0.000                                                                                                                                   | 0.000                        |                           |                         |                        |                                               | 0.000    | 0.000                        |                           |                         |                        |       |                |    |                   |   |  |
|                 | <i>hypothetical protein [Methylobacillus flagellatus KT]637937665 YP_544874</i>                                                         |                              |                           |                         |                        |                                               |          |                              |                           |                         |                        |       |                |    |                   |   |  |
| <b>MFLA0766</b> | 0.000                                                                                                                                   | 0.000                        |                           |                         |                        |                                               | 0.000    | 0.000                        |                           |                         |                        |       |                |    |                   |   |  |
|                 | <i>hypothetical protein [Methylobacillus flagellatus KT]637937666 YP_544875</i>                                                         |                              |                           |                         |                        |                                               |          |                              |                           |                         |                        |       |                |    |                   |   |  |
| <b>MFLA0767</b> | 0.000                                                                                                                                   | 0.000                        |                           |                         |                        |                                               | 0.000    | 0.000                        |                           |                         |                        |       |                |    |                   |   |  |
|                 | <i>hypothetical protein [Methylobacillus flagellatus KT]637937667 YP_544876</i>                                                         |                              |                           |                         |                        |                                               |          |                              |                           |                         |                        |       |                |    |                   |   |  |
| <b>MFLA0768</b> | 3.461                                                                                                                                   | 1.710                        | 3.836                     | 1.786                   | Y ●●● Y                | 4.99 E-2                                      | 22.432   | 21.363                       | 22.994                    | 1.135                   | Y ●●●                  |       |                |    |                   |   |  |
|                 | <i>Lipopolysaccharide heptosyltransferase II [Methylobacillus flagellatus KT]637937668 YP_544877</i>                                    |                              |                           |                         |                        |                                               |          |                              |                           |                         |                        |       |                |    |                   |   |  |
| <b>MFLA0769</b> | 3.901                                                                                                                                   | 4.601                        | 5.293                     | 0.377                   | Y ●●● Y                | 1.8 E-1                                       | 23.445   | 25.107                       | 25.503                    | -0.384                  | Y ●●●                  |       |                |    |                   |   |  |
|                 | <i>" RfaE bifunctional protein, domain I [Methylobacillus flagellatus KT]637937669 YP_544878 ""</i>                                     |                              |                           |                         |                        |                                               |          |                              |                           |                         |                        |       |                |    |                   |   |  |
| <b>MFLA0770</b> | 9.98 E-2                                                                                                                                | 5.405                        | 5.672                     | 6.544                   | -0.270                 | Y ●●● Y                                       | 8.25 E-2 | 22.765                       | 23.300                    | 24.057                  | -0.652                 | Y ●●● |                |    |                   |   |  |
|                 | <i>phosphoheptose isomerase [Methylobacillus flagellatus KT]637937670 YP_544879</i>                                                     |                              |                           |                         |                        |                                               |          |                              |                           |                         |                        |       |                |    |                   |   |  |
| <b>MFLA0771</b> | 2.62 E-7                                                                                                                                | 6.054                        | 6.919                     | 7.551                   | -0.861                 | G ●●● Y                                       | 7.11 E-2 | 25.875                       | 26.568                    | 27.263                  | -0.837                 | G ●●● |                |    |                   |   |  |
|                 | <i>ADP-L-glycero-D-manno-heptose-6-epimerase [Methylobacillus flagellatus KT]637937671 YP_544880</i>                                    |                              |                           |                         |                        |                                               |          |                              |                           |                         |                        |       |                |    |                   |   |  |

| ORF             | AM/OH <i>M. Flagellatus</i> Spectral Count                                                                  |                              |                           |                         |                        | AM/OH <i>M. Flagellatus</i> Protein Intensity |          |                              |                           |                         | Spectral Count         |           | Protein Intensity |  | Log <sub>2</sub> Ratio |
|-----------------|-------------------------------------------------------------------------------------------------------------|------------------------------|---------------------------|-------------------------|------------------------|-----------------------------------------------|----------|------------------------------|---------------------------|-------------------------|------------------------|-----------|-------------------|--|------------------------|
|                 | q-value                                                                                                     | log <sub>2</sub> Methylamine | log <sub>2</sub> Methanol | log <sub>2</sub> Sc Sum | log <sub>2</sub> Ratio | Regulation                                    | q-value  | log <sub>2</sub> Methylamine | log <sub>2</sub> Methanol | log <sub>2</sub> PI Sum | log <sub>2</sub> Ratio | Consensus |                   |  |                        |
| <b>MFLA0772</b> |                                                                                                             | 7.255                        | 6.923                     | 8.098                   | 0.313                  | Y ●●● Y                                       | 2.04 E-1 | 26.274                       | 26.245                    | 27.260                  | 0.026                  | Y ●●      |                   |  |                        |
|                 | <i>Ferrochelatase [Methylobacillus flagellatus KT]637937672 YP_544881</i>                                   |                              |                           |                         |                        |                                               |          |                              |                           |                         |                        |           |                   |  |                        |
| <b>MFLA0773</b> | 1.15 E-2                                                                                                    | 4.921                        | 5.559                     | 6.275                   | -0.778                 | Y ●●● Y                                       | 4.19 E-2 | 23.528                       | 24.648                    | 25.194                  | -1.473                 | Y ●●      |                   |  |                        |
|                 | <i>negative regulator of class I heat shock protein [Methylobacillus flagellatus KT]637937673 YP_544882</i> |                              |                           |                         |                        |                                               |          |                              |                           |                         |                        |           |                   |  |                        |
| <b>MFLA0774</b> | 4.120                                                                                                       | 1.000                        | 4.278                     | 2.120                   | Y ●●● Y                | Y ●●● Y                                       | 1.55 E-1 | 20.817                       | 20.075                    | 21.493                  | -0.293                 | Y ●●      |                   |  |                        |
|                 | <i>NAD(+) kinase [Methylobacillus flagellatus KT]637937674 YP_544883</i>                                    |                              |                           |                         |                        |                                               |          |                              |                           |                         |                        |           |                   |  |                        |
| <b>MFLA0775</b> | 3.1 E-3                                                                                                     | 5.336                        | 4.606                     | 6.016                   | 0.701                  | R ●●● Y                                       | 2.22 E-1 | 24.032                       | 24.118                    | 25.075                  | -0.113                 | Y ●●      |                   |  |                        |
|                 | <i>DNA repair protein RecN [Methylobacillus flagellatus KT]637937675 YP_544884</i>                          |                              |                           |                         |                        |                                               |          |                              |                           |                         |                        |           |                   |  |                        |
| <b>MFLA0776</b> | 4.967                                                                                                       | 4.431                        | 5.724                     | 0.538                   | Y ●●● Y                | Y ●●● Y                                       | 1.98 E-1 | 24.416                       | 24.155                    | 25.291                  | 0.179                  | Y ●●      |                   |  |                        |
|                 | <i>SmpA/OmlA [Methylobacillus flagellatus KT]637937676 YP_544885</i>                                        |                              |                           |                         |                        |                                               |          |                              |                           |                         |                        |           |                   |  |                        |
| <b>MFLA0777</b> | 5.11 E-2                                                                                                    | 5.791                        | 6.186                     | 7.002                   | -0.393                 | Y ●●● G                                       | 9.51 E-3 | 25.005                       | 26.286                    | 26.783                  | -1.274                 | G ●●      |                   |  |                        |
|                 | <i>Dihydrodipicolinate reductase [Methylobacillus flagellatus KT]637937677 YP_544886</i>                    |                              |                           |                         |                        |                                               |          |                              |                           |                         |                        |           |                   |  |                        |
| <b>MFLA0778</b> | 5.21 E-2                                                                                                    | 6.622                        | 6.741                     | 7.683                   | -0.136                 | Y ●●● Y                                       | 3.67 E-2 | 25.652                       | 26.601                    | 27.203                  | -1.014                 | Y ●●      |                   |  |                        |
|                 | <i>" carbamoyl-phosphate synthase, small subunit [Methylobacillus flagellatus KT]637937678 YP_544887 ""</i> |                              |                           |                         |                        |                                               |          |                              |                           |                         |                        |           |                   |  |                        |
| <b>MFLA0779</b> | 1.4 E-5                                                                                                     | 7.722                        | 8.154                     | 8.954                   | -0.423                 | Y ●●● Y                                       | 1.01 E-2 | 26.939                       | 27.628                    | 28.324                  | -0.698                 | Y ●●      |                   |  |                        |
|                 | <i>" carbamoyl-phosphate synthase, large subunit [Methylobacillus flagellatus KT]637937679 YP_544888 ""</i> |                              |                           |                         |                        |                                               |          |                              |                           |                         |                        |           |                   |  |                        |
| <b>MFLA0780</b> | 4.359                                                                                                       | 5.242                        | 5.867                     | -0.986                  | Y ●●● Y                | Y ●●● Y                                       | 2.49 E-2 | 25.011                       | 26.059                    | 26.628                  | -1.033                 | Y ●●      |                   |  |                        |
|                 | <i>GreA/GreB family elongation factor [Methylobacillus flagellatus KT]637937680 YP_544889</i>               |                              |                           |                         |                        |                                               |          |                              |                           |                         |                        |           |                   |  |                        |
| <b>MFLA0781</b> | 0.000                                                                                                       | 0.000                        |                           |                         |                        | ●●●                                           |          | 0.000                        | 0.000                     |                         |                        | ●●        |                   |  |                        |
|                 | <i>hypothetical protein [Methylobacillus flagellatus KT]637937681 YP_544890</i>                             |                              |                           |                         |                        |                                               |          |                              |                           |                         |                        |           |                   |  |                        |
| <b>MFLA0782</b> | 0.000                                                                                                       | 0.000                        |                           |                         |                        | ●●●                                           |          | 0.000                        | 0.000                     |                         |                        | ●●        |                   |  |                        |
|                 | <i>ribosomal RNA methyltransferase RrmJ/FtsJ [Methylobacillus flagellatus KT]637937682 YP_544891</i>        |                              |                           |                         |                        |                                               |          |                              |                           |                         |                        |           |                   |  |                        |
| <b>MFLA0783</b> | 7.448                                                                                                       | 7.808                        | 8.639                     | -0.385                  | Y ●●● Y                | Y ●●● Y                                       | 5.48 E-2 | 26.400                       | 27.101                    | 27.792                  | -0.699                 | Y ●●      |                   |  |                        |
|                 | <i>ATP-dependent metalloprotease FtsH [Methylobacillus flagellatus KT]637937683 YP_544892</i>               |                              |                           |                         |                        |                                               |          |                              |                           |                         |                        |           |                   |  |                        |
| <b>MFLA0784</b> | 4.964                                                                                                       | 4.720                        | 5.847                     | 0.232                   | Y ●●● Y                | Y ●●● Y                                       | 1.35 E-2 | 23.422                       | 24.389                    | 24.985                  | -0.965                 | Y ●●      |                   |  |                        |
|                 | <i>dihydropteroate synthase [Methylobacillus flagellatus KT]637937684 YP_544893</i>                         |                              |                           |                         |                        |                                               |          |                              |                           |                         |                        |           |                   |  |                        |
| <b>MFLA0785</b> | 4.875                                                                                                       | 4.747                        | 5.813                     | 0.092                   | Y ●●● Y                | Y ●●● Y                                       | 2.16 E-1 | 23.481                       | 23.759                    | 24.627                  | -0.638                 | Y ●●      |                   |  |                        |
|                 | <i>phosphoglucosamine mutase [Methylobacillus flagellatus KT]637937685 YP_544894</i>                        |                              |                           |                         |                        |                                               |          |                              |                           |                         |                        |           |                   |  |                        |
| <b>MFLA0786</b> | 0.000                                                                                                       | 0.000                        |                           |                         |                        | ●●●                                           |          | 0.000                        | 0.000                     |                         |                        | ●●        |                   |  |                        |
|                 | <i>" phosphoesterase, PA-phosphatase related [Methylobacillus flagellatus KT]637937686 YP_544895 ""</i>     |                              |                           |                         |                        |                                               |          |                              |                           |                         |                        |           |                   |  |                        |
| <b>MFLA0787</b> | 0.000                                                                                                       | 0.000                        |                           |                         |                        | ●●●                                           |          | 0.000                        | 0.000                     |                         |                        | ●●        |                   |  |                        |
|                 | <i>hypothetical protein [Methylobacillus flagellatus KT]637937687 YP_544896</i>                             |                              |                           |                         |                        |                                               |          |                              |                           |                         |                        |           |                   |  |                        |
| <b>MFLA0788</b> | 3.221                                                                                                       |                              | 3.221                     |                         | Y ●●● Y                | Y ●●● Y                                       |          | 18.994                       |                           | 18.994                  |                        | Y ●●      |                   |  |                        |
|                 | <i>diacylglycerol kinase [Methylobacillus flagellatus KT]637937688 YP_544897</i>                            |                              |                           |                         |                        |                                               |          |                              |                           |                         |                        |           |                   |  |                        |
| <b>MFLA0789</b> | 0.000                                                                                                       | 0.000                        |                           |                         |                        | ●●●                                           |          | 0.000                        | 0.000                     |                         |                        | ●●        |                   |  |                        |
|                 | <i>hypothetical protein [Methylobacillus flagellatus KT]637937689 YP_544898</i>                             |                              |                           |                         |                        |                                               |          |                              |                           |                         |                        |           |                   |  |                        |
| <b>MFLA0790</b> | 0.000                                                                                                       | 0.000                        |                           |                         |                        | ●●●                                           |          | 0.000                        | 0.000                     |                         |                        | ●●        |                   |  |                        |
|                 | <i>" glycosyl transferase, group 1 [Methylobacillus flagellatus KT]637937690 YP_544899 ""</i>               |                              |                           |                         |                        |                                               |          |                              |                           |                         |                        |           |                   |  |                        |
| <b>MFLA0791</b> | 0.000                                                                                                       | 0.000                        |                           |                         |                        | ●●●                                           |          | 0.000                        | 0.000                     |                         |                        | ●●        |                   |  |                        |
|                 | <i>D-amino-acid dehydrogenase [Methylobacillus flagellatus KT]637937691 YP_544900</i>                       |                              |                           |                         |                        |                                               |          |                              |                           |                         |                        |           |                   |  |                        |
| <b>MFLA0792</b> | 1.26 E-2                                                                                                    | 5.783                        | 6.193                     | 7.002                   | -0.453                 | Y ●●● G                                       | 9.03 E-6 | 25.637                       | 26.353                    | 27.039                  | -0.715                 | G ●●      |                   |  |                        |
|                 | <i>Phosphate transport system permease protein 1 [Methylobacillus flagellatus KT]637937692 YP_544901</i>    |                              |                           |                         |                        |                                               |          |                              |                           |                         |                        |           |                   |  |                        |
| <b>MFLA0793</b> | 0.000                                                                                                       | 0.000                        |                           |                         |                        | ●●●                                           |          | 0.000                        | 0.000                     |                         |                        | ●●        |                   |  |                        |
|                 | <i>Phosphate transport system permease protein 2 [Methylobacillus flagellatus KT]637937693 YP_544902</i>    |                              |                           |                         |                        |                                               |          |                              |                           |                         |                        |           |                   |  |                        |

| ORF             | AM/OH <i>M. Flagellatus</i> Spectral Count                                                                                             |                      |                   |                 |                 |            | AM/OH <i>M. Flagellatus</i> Protein Intensity |                      |                   |                 |                 |                        | Consensus | Spectral Count |   | Protein Intensity |  |
|-----------------|----------------------------------------------------------------------------------------------------------------------------------------|----------------------|-------------------|-----------------|-----------------|------------|-----------------------------------------------|----------------------|-------------------|-----------------|-----------------|------------------------|-----------|----------------|---|-------------------|--|
|                 | $q$ -value                                                                                                                             | $\log_2$ Methylamine | $\log_2$ Methanol | $\log_2$ Sc Sum | $\log_2$ -Ratio | Regulation | $q$ -value                                    | $\log_2$ Methylamine | $\log_2$ Methanol | $\log_2$ PI Sum | $\log_2$ -Ratio | Log <sub>2</sub> Ratio |           | -7             | 0 | 7                 |  |
| <b>MFLA0794</b> |                                                                                                                                        | 0.000                | 0.000             |                 |                 |            |                                               | 0.000                | 0.000             |                 |                 |                        |           |                |   |                   |  |
|                 | " Phosphate ABC transporter, permease protein PstC [Methylobacillus flagellatus KT]637937694 YP_544903 ""                              |                      |                   |                 |                 |            |                                               |                      |                   |                 |                 |                        |           |                |   |                   |  |
| <b>MFLA0795</b> | 1.16 E-1                                                                                                                               | 7.068                | 7.029             | 8.049           | 0.050           | Y ●● Y     | 4.09 E-2                                      | 26.367               | 26.585            | 27.480          | -0.217          | Y ●●                   |           |                |   |                   |  |
|                 | Phosphate binding protein [Methylobacillus flagellatus KT]637937695 YP_544904                                                          |                      |                   |                 |                 |            |                                               |                      |                   |                 |                 |                        |           |                |   |                   |  |
| <b>MFLA0796</b> | 1.65 E-2                                                                                                                               | 5.828                | 6.164             | 7.006           | -0.386          | Y ●● Y     | 1.66 E-2                                      | 24.698               | 26.020            | 26.505          | -1.299          | Y ●●                   |           |                |   |                   |  |
|                 | peptide chain release factor 2 [Methylobacillus flagellatus KT]637937696 YP_544905                                                     |                      |                   |                 |                 |            |                                               |                      |                   |                 |                 |                        |           |                |   |                   |  |
| <b>MFLA0797</b> | 8.36 E-9                                                                                                                               | 5.474                | 6.489             | 7.069           | -0.908          | G ●● Y     | 7.77 E-2                                      | 26.046               | 26.549            | 27.319          | -0.454          | G ●●                   |           |                |   |                   |  |
|                 | lysyl-tRNA synthetase [Methylobacillus flagellatus KT]637937697 YP_544906                                                              |                      |                   |                 |                 |            |                                               |                      |                   |                 |                 |                        |           |                |   |                   |  |
| <b>MFLA0798</b> |                                                                                                                                        | 0.000                | 0.000             |                 |                 |            |                                               | 0.000                | 0.000             |                 |                 |                        |           |                |   |                   |  |
|                 | hypothetical protein [Methylobacillus flagellatus KT]637937698 YP_544907                                                               |                      |                   |                 |                 |            |                                               |                      |                   |                 |                 |                        |           |                |   |                   |  |
| <b>MFLA0799</b> |                                                                                                                                        | 2.828                | 4.000             | 4.530           | -2.172          | Y ●● Y     | 8.26 E-2                                      | 22.556               | 23.056            | 23.827          | -1.902          | Y ●●                   |           |                |   |                   |  |
|                 | sulphate transporter [Methylobacillus flagellatus KT]637937699 YP_544908                                                               |                      |                   |                 |                 |            |                                               |                      |                   |                 |                 |                        |           |                |   |                   |  |
| <b>MFLA0800</b> |                                                                                                                                        | 8.939                | 8.750             | 9.848           | 0.169           | Y ●● Y     | 2.17 E-1                                      | 29.094               | 28.967            | 30.032          | 0.150           | Y ●●                   |           |                |   |                   |  |
|                 | carbonic anhydrase [Methylobacillus flagellatus KT]637937700 YP_544909                                                                 |                      |                   |                 |                 |            |                                               |                      |                   |                 |                 |                        |           |                |   |                   |  |
| <b>MFLA0801</b> |                                                                                                                                        | 0.000                | 0.000             |                 |                 |            |                                               | 0.000                | 0.000             |                 |                 |                        |           |                |   |                   |  |
|                 | phosphate-selective porin O and P [Methylobacillus flagellatus KT]637937701 YP_544910                                                  |                      |                   |                 |                 |            |                                               |                      |                   |                 |                 |                        |           |                |   |                   |  |
| <b>MFLA0802</b> |                                                                                                                                        | 1.521                | 1.346             | 2.436           | 0.174           | Y ●● Y     |                                               | 18.855               | 17.874            | 19.447          | 0.981           | Y ●●                   |           |                |   |                   |  |
|                 | diguanylate cyclase/phosphodiesterase (GGDEF & EAL domains) with PAS/PAC sensor(s) [Methylobacillus flagellatus KT]637937702 YP_544911 |                      |                   |                 |                 |            |                                               |                      |                   |                 |                 |                        |           |                |   |                   |  |
| <b>MFLA0803</b> |                                                                                                                                        | 1.398                |                   | 1.398           |                 | Y ●● Y     |                                               | 21.510               |                   | 21.510          |                 | Y ●●                   |           |                |   |                   |  |
|                 | " Ferredoxin, 2Fe-2S type [Methylobacillus flagellatus KT]637937703 YP_544912 ""                                                       |                      |                   |                 |                 |            |                                               |                      |                   |                 |                 |                        |           |                |   |                   |  |
| <b>MFLA0804</b> | 6.75 E-2                                                                                                                               | 6.924                | 6.650             | 7.794           | 0.274           | Y ●● G     | 9.69 E-3                                      | 24.834               | 25.842            | 26.424          | -1.022          | Y ●●                   |           |                |   |                   |  |
|                 | Fe-S protein assembly chaperone HscA [Methylobacillus flagellatus KT]637937704 YP_544913                                               |                      |                   |                 |                 |            |                                               |                      |                   |                 |                 |                        |           |                |   |                   |  |
| <b>MFLA0805</b> |                                                                                                                                        | 4.222                | 4.370             | 5.298           | -0.164          | Y ●● Y     | 1.1 E-2                                       | 23.149               | 24.327            | 24.855          | -1.211          | Y ●●                   |           |                |   |                   |  |
|                 | co-chaperone Hsc20 [Methylobacillus flagellatus KT]637937705 YP_544914                                                                 |                      |                   |                 |                 |            |                                               |                      |                   |                 |                 |                        |           |                |   |                   |  |
| <b>MFLA0806</b> |                                                                                                                                        | 0.000                | 0.000             |                 |                 |            |                                               | 0.000                | 0.000             |                 |                 |                        |           |                |   |                   |  |
|                 | iron-sulfur cluster assembly protein IscA [Methylobacillus flagellatus KT]637937706 YP_544915                                          |                      |                   |                 |                 |            |                                               |                      |                   |                 |                 |                        |           |                |   |                   |  |
| <b>MFLA0807</b> |                                                                                                                                        | 2.813                | 5.151             | 5.411           | -1.334          | Y ●● Y     | 3.26 E-2                                      | 22.252               | 25.709            | 25.834          | -2.454          | Y ●●                   |           |                |   |                   |  |
|                 | FeS cluster assembly scaffold IscU [Methylobacillus flagellatus KT]637937707 YP_544916                                                 |                      |                   |                 |                 |            |                                               |                      |                   |                 |                 |                        |           |                |   |                   |  |
| <b>MFLA0808</b> | 0                                                                                                                                      | 6.766                | 8.203             | 8.656           | -1.454          | G ●● Y     | 4.51 E-2                                      | 26.234               | 27.064            | 27.708          | -0.889          | G ●●                   |           |                |   |                   |  |
|                 | cysteine desulfurase IscS [Methylobacillus flagellatus KT]637937708 YP_544917                                                          |                      |                   |                 |                 |            |                                               |                      |                   |                 |                 |                        |           |                |   |                   |  |
| <b>MFLA0809</b> |                                                                                                                                        | 3.330                | 5.119             | 5.486           | -2.064          | Y ●● G     | 9.69 E-3                                      | 21.717               | 24.122            | 24.371          | -2.693          | G ●●                   |           |                |   |                   |  |
|                 | " aminotransferase, class V [Methylobacillus flagellatus KT]637937709 YP_544918 ""                                                     |                      |                   |                 |                 |            |                                               |                      |                   |                 |                 |                        |           |                |   |                   |  |
| <b>MFLA0810</b> |                                                                                                                                        | 3.106                | 4.559             | 5.008           | -0.453          | Y ●● Y     | 6.98 E-2                                      | 20.708               | 22.245            | 22.673          | -0.532          | Y ●●                   |           |                |   |                   |  |
|                 | " transcriptional regulator, BadM/Rrf2 family [Methylobacillus flagellatus KT]637937710 YP_544919 ""                                   |                      |                   |                 |                 |            |                                               |                      |                   |                 |                 |                        |           |                |   |                   |  |
| <b>MFLA0811</b> | 5.1 E-5                                                                                                                                | 5.658                | 4.450             | 6.177           | 1.225           | R ●● G     | 5.17 E-3                                      | 22.776               | 24.340            | 24.760          | -1.562          | Y ●●                   |           |                |   |                   |  |
|                 | serine O-acetyltransferase [Methylobacillus flagellatus KT]637937711 YP_544920                                                         |                      |                   |                 |                 |            |                                               |                      |                   |                 |                 |                        |           |                |   |                   |  |
| <b>MFLA0812</b> |                                                                                                                                        | 3.996                | 4.117             | 5.058           | -0.075          | Y ●● Y     | 1.37 E-2                                      | 20.440               | 22.458            | 22.777          | -2.034          | Y ●●                   |           |                |   |                   |  |
|                 | " RNA methyltransferase TrmH, group 1 [Methylobacillus flagellatus KT]637937712 YP_544921 ""                                           |                      |                   |                 |                 |            |                                               |                      |                   |                 |                 |                        |           |                |   |                   |  |
| <b>MFLA0813</b> |                                                                                                                                        | 5.687                | 5.065             | 6.409           | 0.530           | Y ●● Y     | 7.57 E-2                                      | 25.294               | 25.644            | 26.480          | -0.362          | Y ●●                   |           |                |   |                   |  |
|                 | inositol monophosphatase [Methylobacillus flagellatus KT]637937713 YP_544922                                                           |                      |                   |                 |                 |            |                                               |                      |                   |                 |                 |                        |           |                |   |                   |  |
| <b>MFLA0814</b> |                                                                                                                                        | 3.600                | 2.295             | 4.090           | 1.201           | Y ●● Y     | 2.59 E-1                                      | 21.659               | 21.620            | 22.639          | -0.037          | Y ●●                   |           |                |   |                   |  |
|                 | " signal transduction histidine kinase, glucose-6-phosphate specific [Methylobacillus flagellatus KT]637937714 YP_544923 ""            |                      |                   |                 |                 |            |                                               |                      |                   |                 |                 |                        |           |                |   |                   |  |
| <b>MFLA0815</b> |                                                                                                                                        | 3.753                | 3.453             | 4.611           | 0.325           | Y ●● Y     | 2.08 E-1                                      | 23.501               | 23.402            | 24.452          | 0.099           | Y ●●                   |           |                |   |                   |  |
|                 | " two component transcriptional regulator, LuxR family [Methylobacillus flagellatus KT]637937715 YP_544924 ""                          |                      |                   |                 |                 |            |                                               |                      |                   |                 |                 |                        |           |                |   |                   |  |

| ORF             | AM/OH <i>M. Flagellatus</i> Spectral Count                                                                                  |                              |                           |                         |                        | AM/OH <i>M. Flagellatus</i> Protein Intensity |          |                              |                           |                         | Spectral Count         |           | Protein Intensity |  | Log <sub>2</sub> Ratio |
|-----------------|-----------------------------------------------------------------------------------------------------------------------------|------------------------------|---------------------------|-------------------------|------------------------|-----------------------------------------------|----------|------------------------------|---------------------------|-------------------------|------------------------|-----------|-------------------|--|------------------------|
|                 | q-value                                                                                                                     | log <sub>2</sub> Methylamine | log <sub>2</sub> Methanol | log <sub>2</sub> Sc Sum | log <sub>2</sub> Ratio | Regulation                                    | q-value  | log <sub>2</sub> Methylamine | log <sub>2</sub> Methanol | log <sub>2</sub> PI Sum | log <sub>2</sub> Ratio | Consensus |                   |  |                        |
| <b>MFLA0816</b> | 1.31 E-6                                                                                                                    | 6.810                        | 7.423                     | 8.149                   | -0.641                 | G ●● Y                                        | 3.67 E-2 | 26.339                       | 27.324                    | 27.914                  | -1.168                 | G ●●      |                   |  |                        |
|                 | "two component transcriptional regulator, LuxR family [Methylobacillus flagellatus KT]637937716 YP_544925 ""                |                              |                           |                         |                        |                                               |          |                              |                           |                         |                        |           |                   |  |                        |
| <b>MFLA0817</b> | 1.34 E-6                                                                                                                    | 5.590                        | 6.305                     | 6.992                   | -0.909                 | G ●● Y                                        | 7.67 E-2 | 24.820                       | 25.809                    | 26.398                  | -1.867                 | G ●●      |                   |  |                        |
|                 | "signal transduction histidine kinase, glucose-6-phosphate specific [Methylobacillus flagellatus KT]637937717 YP_544926 ""  |                              |                           |                         |                        |                                               |          |                              |                           |                         |                        |           |                   |  |                        |
| <b>MFLA0818</b> | 3.930                                                                                                                       |                              |                           | 3.930                   |                        | Y ●● Y                                        |          | 21.641                       |                           | 21.641                  |                        | Y ●●      |                   |  |                        |
|                 | "TonB-dependent receptor, plug [Methylobacillus flagellatus KT]637937718 YP_544927 ""                                       |                              |                           |                         |                        |                                               |          |                              |                           |                         |                        |           |                   |  |                        |
| <b>MFLA0819</b> | 6.700                                                                                                                       | 6.938                        | 7.824                     | -0.306                  | Y ●● Y                 |                                               | 1.2 E-1  | 27.101                       | 26.613                    | 27.877                  | 0.384                  | Y ●●      |                   |  |                        |
|                 | hypothetical protein [Methylobacillus flagellatus KT]637937719 YP_544928                                                    |                              |                           |                         |                        |                                               |          |                              |                           |                         |                        |           |                   |  |                        |
| <b>MFLA0820</b> | 0.000                                                                                                                       | 0.000                        |                           |                         |                        |                                               |          | 0.000                        | 0.000                     |                         |                        |           |                   |  |                        |
| <b>MFLA0964</b> | hypothetical protein [Methylobacillus flagellatus KT]637937720 YP_544929                                                    |                              |                           |                         |                        |                                               |          |                              |                           |                         |                        |           |                   |  |                        |
| <b>MFLA0821</b> | 0.000                                                                                                                       | 0.000                        |                           |                         |                        |                                               |          | 0.000                        | 0.000                     |                         |                        |           |                   |  |                        |
| <b>MFLA0965</b> | "glycoside hydrolase, family 24 [Methylobacillus flagellatus KT]637937721 YP_544930 ""                                      |                              |                           |                         |                        |                                               |          |                              |                           |                         |                        |           |                   |  |                        |
| <b>MFLA0822</b> | 0.000                                                                                                                       | 0.000                        |                           |                         |                        |                                               |          | 0.000                        | 0.000                     |                         |                        |           |                   |  |                        |
| <b>MFLA0966</b> | hypothetical protein [Methylobacillus flagellatus KT]637937722 YP_544931                                                    |                              |                           |                         |                        |                                               |          |                              |                           |                         |                        |           |                   |  |                        |
| <b>MFLA0823</b> | 0.000                                                                                                                       | 0.000                        |                           |                         |                        |                                               |          | 0.000                        | 0.000                     |                         |                        |           |                   |  |                        |
| <b>MFLA0967</b> | hypothetical protein [Methylobacillus flagellatus KT]637937723 YP_544932                                                    |                              |                           |                         |                        |                                               |          |                              |                           |                         |                        |           |                   |  |                        |
| <b>MFLA0824</b> | 0.000                                                                                                                       | 0.000                        |                           |                         |                        |                                               |          | 0.000                        | 0.000                     |                         |                        |           |                   |  |                        |
| <b>MFLA0968</b> | hypothetical protein [Methylobacillus flagellatus KT]637937724 YP_544933                                                    |                              |                           |                         |                        |                                               |          |                              |                           |                         |                        |           |                   |  |                        |
| <b>MFLA0825</b> | 0.000                                                                                                                       | 0.000                        |                           |                         |                        |                                               |          | 0.000                        | 0.000                     |                         |                        |           |                   |  |                        |
| <b>MFLA0969</b> | hypothetical protein [Methylobacillus flagellatus KT]637937725 YP_544934                                                    |                              |                           |                         |                        |                                               |          |                              |                           |                         |                        |           |                   |  |                        |
| <b>MFLA0826</b> | 0.000                                                                                                                       | 0.000                        |                           |                         |                        |                                               |          | 0.000                        | 0.000                     |                         |                        |           |                   |  |                        |
| <b>MFLA0970</b> | hypothetical protein [Methylobacillus flagellatus KT]637937726 YP_544935                                                    |                              |                           |                         |                        |                                               |          |                              |                           |                         |                        |           |                   |  |                        |
| <b>MFLA0827</b> | 0.000                                                                                                                       | 0.000                        |                           |                         |                        |                                               |          | 0.000                        | 0.000                     |                         |                        |           |                   |  |                        |
| <b>MFLA0971</b> | hypothetical protein [Methylobacillus flagellatus KT]637937727 YP_544936                                                    |                              |                           |                         |                        |                                               |          |                              |                           |                         |                        |           |                   |  |                        |
| <b>MFLA0828</b> | 0.000                                                                                                                       | 0.000                        |                           |                         |                        |                                               |          | 0.000                        | 0.000                     |                         |                        |           |                   |  |                        |
| <b>MFLA0972</b> | hypothetical protein [Methylobacillus flagellatus KT]637937728 YP_544937                                                    |                              |                           |                         |                        |                                               |          |                              |                           |                         |                        |           |                   |  |                        |
| <b>MFLA0829</b> | 0.000                                                                                                                       | 0.000                        |                           |                         |                        |                                               |          | 0.000                        | 0.000                     |                         |                        |           |                   |  |                        |
| <b>MFLA0973</b> | hypothetical protein [Methylobacillus flagellatus KT]637937729 YP_544938                                                    |                              |                           |                         |                        |                                               |          |                              |                           |                         |                        |           |                   |  |                        |
| <b>MFLA0830</b> | 0.000                                                                                                                       | 0.000                        |                           |                         |                        |                                               |          | 0.000                        | 0.000                     |                         |                        |           |                   |  |                        |
| <b>MFLA0974</b> | hypothetical protein [Methylobacillus flagellatus KT]637937730 YP_544939                                                    |                              |                           |                         |                        |                                               |          |                              |                           |                         |                        |           |                   |  |                        |
| <b>MFLA0831</b> | 0.000                                                                                                                       | 0.000                        |                           |                         |                        |                                               |          | 0.000                        | 0.000                     |                         |                        |           |                   |  |                        |
| <b>MFLA0975</b> | bacteriophage replication gene A [Methylobacillus flagellatus KT]637937731 YP_544940                                        |                              |                           |                         |                        |                                               |          |                              |                           |                         |                        |           |                   |  |                        |
| <b>MFLA0832</b> | 0.000                                                                                                                       | 0.000                        |                           |                         |                        |                                               |          | 0.000                        | 0.000                     |                         |                        |           |                   |  |                        |
| <b>MFLA0976</b> | hypothetical protein [Methylobacillus flagellatus KT]637937732 YP_544941                                                    |                              |                           |                         |                        |                                               |          |                              |                           |                         |                        |           |                   |  |                        |
| <b>MFLA0833</b> | 0.000                                                                                                                       | 0.000                        |                           |                         |                        |                                               |          | 0.000                        | 0.000                     |                         |                        |           |                   |  |                        |
| <b>MFLA0977</b> | TonB-dependent receptor [Methylobacillus flagellatus KT]637937733 YP_544942                                                 |                              |                           |                         |                        |                                               |          |                              |                           |                         |                        |           |                   |  |                        |
| <b>MFLA0834</b> | 5.358                                                                                                                       | 5.672                        | 6.523                     | -0.150                  | Y ●● Y                 |                                               | 1.06 E-1 | 22.981                       | 23.887                    | 24.504                  | -0.722                 | Y ●●      |                   |  |                        |
| <b>MFLA0978</b> | DNA mismatch repair protein MutS [Methylobacillus flagellatus KT]637937734 YP_544943                                        |                              |                           |                         |                        |                                               |          |                              |                           |                         |                        |           |                   |  |                        |
| <b>MFLA0835</b> | 0.000                                                                                                                       | 0.000                        |                           |                         |                        |                                               |          | 0.000                        | 0.000                     |                         |                        |           |                   |  |                        |
| <b>MFLA0979</b> | hypothetical protein [Methylobacillus flagellatus KT]637937735 YP_544944                                                    |                              |                           |                         |                        |                                               |          |                              |                           |                         |                        |           |                   |  |                        |
| <b>MFLA0836</b> | 7.008                                                                                                                       | 7.649                        | 8.364                     | -0.765                  | Y ●● Y                 |                                               | 2.87 E-2 | 25.999                       | 27.407                    | 27.868                  | -1.905                 | Y ●●      |                   |  |                        |
| <b>MFLA0980</b> | fkbp-type peptidyl-prolyl cis-trans isomerase [Methylobacillus flagellatus KT]637937736 YP_544945                           |                              |                           |                         |                        |                                               |          |                              |                           |                         |                        |           |                   |  |                        |
| <b>MFLA0837</b> | 4.295                                                                                                                       | 4.877                        | 5.615                     | -0.667                  | Y ●● Y                 |                                               | 4.29 E-2 | 22.209                       | 24.089                    | 24.436                  | -1.756                 | Y ●●      |                   |  |                        |
| <b>MFLA0981</b> | alkyl hydroperoxide reductase/ Thiol specific antioxidant/ Mal allergen [Methylobacillus flagellatus KT]637937737 YP_544946 |                              |                           |                         |                        |                                               |          |                              |                           |                         |                        |           |                   |  |                        |

| ORF                                                                                                                    | AM/OH <i>M. Flagellatus</i> Spectral Count |                              |                           |                         |                        | AM/OH <i>M. Flagellatus</i> Protein Intensity |            |                              |                           |                         | Spectral Count         |           | Protein Intensity      |  |  |
|------------------------------------------------------------------------------------------------------------------------|--------------------------------------------|------------------------------|---------------------------|-------------------------|------------------------|-----------------------------------------------|------------|------------------------------|---------------------------|-------------------------|------------------------|-----------|------------------------|--|--|
|                                                                                                                        | $q$ -value                                 | log <sub>2</sub> Methylamine | log <sub>2</sub> Methanol | log <sub>2</sub> Sc Sum | log <sub>2</sub> Ratio | Regulation                                    | $q$ -value | log <sub>2</sub> Methylamine | log <sub>2</sub> Methanol | log <sub>2</sub> PI Sum | log <sub>2</sub> Ratio | Consensus | Log <sub>2</sub> Ratio |  |  |
| <b>MFLA0838</b><br><b>MFLA0982</b>                                                                                     |                                            | 2.843                        | 3.429                     | 4.165                   | 1.045                  | Y ●● Y                                        | 1.93 E-1   | 21.678                       | 22.212                    | 22.970                  | 0.948                  | Y ●       |                        |  |  |
| <i>Cupin 4 [Methylobacillus flagellatus KT]637937738 YP_544947</i>                                                     |                                            |                              |                           |                         |                        |                                               |            |                              |                           |                         |                        |           |                        |  |  |
| <b>MFLA0839</b><br><b>MFLA0983</b>                                                                                     |                                            | 3.364                        | 1.710                     | 3.762                   | 1.690                  | Y ●● Y                                        | 8.99 E-2   | 20.701                       | 19.954                    | 21.376                  | 0.650                  | Y ●       |                        |  |  |
| <i>NolW-like protein [Methylobacillus flagellatus KT]637937739 YP_544948</i>                                           |                                            |                              |                           |                         |                        |                                               |            |                              |                           |                         |                        |           |                        |  |  |
| <b>MFLA0840</b><br><b>MFLA0984</b>                                                                                     |                                            | 0.000                        | 0.000                     |                         |                        | ■ ■                                           |            | 0.000                        | 0.000                     |                         |                        | ■         |                        |  |  |
| <i>Lip [Methylobacillus flagellatus KT]637937740 YP_544949</i>                                                         |                                            |                              |                           |                         |                        |                                               |            |                              |                           |                         |                        |           |                        |  |  |
| <b>MFLA0841</b><br><b>MFLA0985</b>                                                                                     |                                            | 0.000                        | 0.000                     |                         |                        | ■ ■                                           |            | 0.000                        | 0.000                     |                         |                        | ■         |                        |  |  |
| <i>beta-lactamase-like protein [Methylobacillus flagellatus KT]637937741 YP_544950</i>                                 |                                            |                              |                           |                         |                        |                                               |            |                              |                           |                         |                        |           |                        |  |  |
| <b>MFLA0842</b><br><b>MFLA0986</b>                                                                                     |                                            | 5.96 E-9                     | 5.838                     | 6.759                   | 7.371                  | G ●● G                                        | 1.69 E-3   | 25.834                       | 27.318                    | 27.759                  | -1.484                 | G ●       |                        |  |  |
| <i>uncharacterized lipoprotein [Methylobacillus flagellatus KT]637937742 YP_544951</i>                                 |                                            |                              |                           |                         |                        |                                               |            |                              |                           |                         |                        |           |                        |  |  |
| <b>MFLA0843</b><br><b>MFLA0987</b>                                                                                     |                                            | 7.384                        | 7.427                     | 8.405                   | -0.133                 | Y ●● Y                                        | 1.82 E-2   | 26.731                       | 27.531                    | 28.185                  | -0.788                 | Y ●       |                        |  |  |
| <i>dihydrodipicolinate synthase [Methylobacillus flagellatus KT]637937743 YP_544952</i>                                |                                            |                              |                           |                         |                        |                                               |            |                              |                           |                         |                        |           |                        |  |  |
| <b>MFLA0844</b><br><b>MFLA0988</b>                                                                                     |                                            | 0.000                        | 0.000                     |                         |                        | ■ ■                                           |            | 0.000                        | 0.000                     |                         |                        | ■         |                        |  |  |
| <i>hypothetical protein [Methylobacillus flagellatus KT]637937744 YP_544953</i>                                        |                                            |                              |                           |                         |                        |                                               |            |                              |                           |                         |                        |           |                        |  |  |
| <b>MFLA0845</b><br><b>MFLA0989</b>                                                                                     |                                            | 3.960                        | 1.807                     | 4.253                   | 1.056                  | Y ●● Y                                        | 9.62 E-2   | 22.202                       | 20.442                    | 22.575                  | 0.733                  | Y ●       |                        |  |  |
| <i>protein of unknown function UPF0227 [Methylobacillus flagellatus KT]637937745 YP_544954</i>                         |                                            |                              |                           |                         |                        |                                               |            |                              |                           |                         |                        |           |                        |  |  |
| <b>MFLA0846</b><br><b>MFLA0990</b>                                                                                     |                                            | 4.754                        | 3.957                     | 5.410                   | 0.473                  | Y ●● Y                                        | 1.32 E-1   | 23.378                       | 22.416                    | 23.976                  | 0.849                  | Y ●       |                        |  |  |
| <i>"HAD-superfamily subfamily IIA hydrolase, hypothetical 2 [Methylobacillus flagellatus KT]637937746 YP_544955 ""</i> |                                            |                              |                           |                         |                        |                                               |            |                              |                           |                         |                        |           |                        |  |  |
| <b>MFLA0847</b><br><b>MFLA0991</b>                                                                                     |                                            | 1.04 E-5                     | 5.567                     | 4.212                   | 6.043                  | R ●● Y                                        | 2.16 E-1   | 23.492                       | 23.332                    | 24.414                  | 0.304                  | R ●       |                        |  |  |
| <i>hypothetical protein [Methylobacillus flagellatus KT]637937747 YP_544956</i>                                        |                                            |                              |                           |                         |                        |                                               |            |                              |                           |                         |                        |           |                        |  |  |
| <b>MFLA0848</b><br><b>MFLA0992</b>                                                                                     |                                            | 2.843                        | 1.184                     | 3.239                   | 2.669                  | Y ●● Y                                        | 1.48 E-1   | 19.754                       | 21.935                    | 22.222                  | -0.894                 | Y ●       |                        |  |  |
| <i>hypothetical protein [Methylobacillus flagellatus KT]637937748 YP_544957</i>                                        |                                            |                              |                           |                         |                        |                                               |            |                              |                           |                         |                        |           |                        |  |  |
| <b>MFLA0849</b><br><b>MFLA0993</b>                                                                                     |                                            | 6.517                        |                           | 6.517                   |                        | Y ●● Y                                        |            | 23.788                       |                           | 23.788                  |                        | Y ●       |                        |  |  |
| <i>hypothetical protein [Methylobacillus flagellatus KT]637937749 YP_544958</i>                                        |                                            |                              |                           |                         |                        |                                               |            |                              |                           |                         |                        |           |                        |  |  |
| <b>MFLA0850</b><br><b>MFLA0994</b>                                                                                     |                                            | 0.000                        | 0.000                     |                         |                        | ■ ■                                           |            | 0.000                        | 0.000                     |                         |                        | ■         |                        |  |  |
| <i>"electron transport complex, RnfABCDGE type, B subunit [Methylobacillus flagellatus KT]637937750 YP_544959 ""</i>   |                                            |                              |                           |                         |                        |                                               |            |                              |                           |                         |                        |           |                        |  |  |
| <b>MFLA0851</b><br><b>MFLA0995</b>                                                                                     |                                            | 3.093                        | 0.585                     | 3.327                   | 1.486                  | Y ●● Y                                        | 1.58 E-1   | 20.478                       | 18.388                    | 20.782                  | 0.733                  | Y ●       |                        |  |  |
| <i>endonuclease III [Methylobacillus flagellatus KT]637937751 YP_544960</i>                                            |                                            |                              |                           |                         |                        |                                               |            |                              |                           |                         |                        |           |                        |  |  |
| <b>MFLA0852</b><br><b>MFLA0996</b>                                                                                     |                                            | 0.000                        | 0.000                     |                         |                        | ■ ■                                           |            | 0.000                        | 0.000                     |                         |                        | ■         |                        |  |  |
| <i>hypothetical protein [Methylobacillus flagellatus KT]637937752 YP_544961</i>                                        |                                            |                              |                           |                         |                        |                                               |            |                              |                           |                         |                        |           |                        |  |  |
| <b>MFLA0853</b><br><b>MFLA0997</b>                                                                                     |                                            | 1.26 E-10                    | 4.993                     | 6.355                   | 6.829                  | G ●● Y                                        | 1.13 E-2   | 24.011                       | 25.144                    | 25.686                  | -1.145                 | G ●       |                        |  |  |
| <i>Phosphomethylpyrimidine kinase [Methylobacillus flagellatus KT]637937753 YP_544962</i>                              |                                            |                              |                           |                         |                        |                                               |            |                              |                           |                         |                        |           |                        |  |  |
| <b>MFLA0854</b><br><b>MFLA0998</b>                                                                                     |                                            | 0.000                        | 0.000                     |                         |                        | ■ ■                                           |            | 0.000                        | 0.000                     |                         |                        | ■         |                        |  |  |
| <i>hypothetical protein [Methylobacillus flagellatus KT]637937754 YP_544963</i>                                        |                                            |                              |                           |                         |                        |                                               |            |                              |                           |                         |                        |           |                        |  |  |
| <b>MFLA0855</b><br><b>MFLA0999</b>                                                                                     |                                            | 4.324                        | 4.511                     | 5.421                   | -0.200                 | Y ●● Y                                        | 6.58 E-2   | 22.536                       | 23.065                    | 23.824                  | -0.615                 | Y ●       |                        |  |  |
| <i>L-aspartate oxidase [Methylobacillus flagellatus KT]637937755 YP_544964</i>                                         |                                            |                              |                           |                         |                        |                                               |            |                              |                           |                         |                        |           |                        |  |  |
| <b>MFLA0856</b><br><b>MFLA1000</b>                                                                                     |                                            | 4.736                        | 3.710                     | 5.312                   | 1.058                  | Y ●● Y                                        | 1.08 E-1   | 23.667                       | 22.888                    | 24.330                  | 0.783                  | Y ●       |                        |  |  |
| <i>sigma-24 (FecI-like) [Methylobacillus flagellatus KT]637937756 YP_544965</i>                                        |                                            |                              |                           |                         |                        |                                               |            |                              |                           |                         |                        |           |                        |  |  |
| <b>MFLA0857</b><br><b>MFLA1001</b>                                                                                     |                                            | 1.813                        |                           | 1.813                   |                        | Y ●● Y                                        |            | 21.206                       |                           | 21.206                  |                        | Y ●       |                        |  |  |
| <i>hypothetical protein [Methylobacillus flagellatus KT]637937757 YP_544966</i>                                        |                                            |                              |                           |                         |                        |                                               |            |                              |                           |                         |                        |           |                        |  |  |
| <b>MFLA0858</b><br><b>MFLA1002</b>                                                                                     |                                            | 4.557                        | 4.895                     | 5.736                   | -0.391                 | Y ●● Y                                        | 8.38 E-2   | 22.610                       | 23.019                    | 23.829                  | -0.480                 | Y ●       |                        |  |  |
| <i>"sigma E regulatory protein, MucB/RseB [Methylobacillus flagellatus KT]637937758 YP_544967 ""</i>                   |                                            |                              |                           |                         |                        |                                               |            |                              |                           |                         |                        |           |                        |  |  |
| <b>MFLA0859</b><br><b>MFLA1003</b>                                                                                     |                                            | 0                            | 9.864                     | 9.089                   | 10.528                 | R ●● Y                                        | 6.37 E-2   | 28.280                       | 28.628                    | 29.464                  | -0.373                 | Y ●       |                        |  |  |
| <i>"Peptidase S1C, Do [Methylobacillus flagellatus KT]637937759 YP_544968 ""</i>                                       |                                            |                              |                           |                         |                        |                                               |            |                              |                           |                         |                        |           |                        |  |  |



| ORF                                                                                                       | AM/OH <i>M. Flagellatus</i> Spectral Count |                              |                           |                         |                        | AM/OH <i>M. Flagellatus</i> Protein Intensity |                 |                              |                           |                         | Spectral Count         |           | Protein Intensity      |  |
|-----------------------------------------------------------------------------------------------------------|--------------------------------------------|------------------------------|---------------------------|-------------------------|------------------------|-----------------------------------------------|-----------------|------------------------------|---------------------------|-------------------------|------------------------|-----------|------------------------|--|
|                                                                                                           | <i>g</i> -value                            | log <sub>2</sub> Methylamine | log <sub>2</sub> Methanol | log <sub>2</sub> Sc Sum | log <sub>2</sub> Ratio | Regulation                                    | <i>g</i> -value | log <sub>2</sub> Methylamine | log <sub>2</sub> Methanol | log <sub>2</sub> PI Sum | log <sub>2</sub> Ratio | Consensus | Log <sub>2</sub> Ratio |  |
| <b>MFLA0860</b><br><b>MFLA1004</b>                                                                        |                                            | 6.234                        | 6.589                     | 7.423                   | -0.410                 | Y ●● Y                                        | 1.35 E-1        | 25.126                       | 25.600                    | 26.382                  | -0.731                 | Y ●       |                        |  |
| <i>Small GTP-binding protein domain [Methylobacillus flagellatus KT]637937760 YP_544969</i>               |                                            |                              |                           |                         |                        |                                               |                 |                              |                           |                         |                        |           |                        |  |
| <b>MFLA0861</b><br><b>MFLA1005</b>                                                                        |                                            | 5.276                        | 4.648                     | 5.996                   | 0.318                  | Y ●● Y                                        | 1.95 E-1        | 24.837                       | 24.449                    | 25.656                  | -0.028                 | Y ●       |                        |  |
| <i>"Peptidase S26A, signal peptidase I [Methylobacillus flagellatus KT]637937761 YP_544970 ""</i>         |                                            |                              |                           |                         |                        |                                               |                 |                              |                           |                         |                        |           |                        |  |
| <b>MFLA0862</b><br><b>MFLA1006</b>                                                                        |                                            | 3.648                        | 4.395                     | 5.069                   | -0.992                 | Y ●● Y                                        | 9.6 E-2         | 22.752                       | 23.391                    | 24.107                  | -0.902                 | Y ●       |                        |  |
| <i>putative transmembrane protein [Methylobacillus flagellatus KT]637937762 YP_544971</i>                 |                                            |                              |                           |                         |                        |                                               |                 |                              |                           |                         |                        |           |                        |  |
| <b>MFLA0863</b><br><b>MFLA1007</b>                                                                        |                                            | 3.915                        | 2.966                     | 4.517                   | 0.947                  | Y ●● R                                        | 9.95 E-3        | 23.135                       | 21.780                    | 23.611                  | 1.348                  | R ●       |                        |  |
| <i>Ribonuclease III [Methylobacillus flagellatus KT]637937763 YP_544972</i>                               |                                            |                              |                           |                         |                        |                                               |                 |                              |                           |                         |                        |           |                        |  |
| <b>MFLA0864</b><br><b>MFLA1008</b>                                                                        |                                            | 5.352                        | 5.117                     | 6.239                   | 0.132                  | Y ●● Y                                        | 1.89 E-1        | 23.402                       | 23.864                    | 24.651                  | -1.877                 | Y ●       |                        |  |
| <i>GTP-binding protein Era [Methylobacillus flagellatus KT]637937764 YP_544973</i>                        |                                            |                              |                           |                         |                        |                                               |                 |                              |                           |                         |                        |           |                        |  |
| <b>MFLA0865</b><br><b>MFLA1009</b>                                                                        |                                            | 0.000                        | 0.000                     |                         |                        | ●●                                            |                 | 0.000                        | 0.000                     |                         |                        | ●         |                        |  |
| <i>putative lipoprotein [Methylobacillus flagellatus KT]637937765 YP_544974</i>                           |                                            |                              |                           |                         |                        |                                               |                 |                              |                           |                         |                        |           |                        |  |
| <b>MFLA0866</b><br><b>MFLA1010</b>                                                                        |                                            | 1.843                        | 2.095                     | 2.974                   | 0.877                  | Y ●● Y                                        | 1.53 E-1        | 20.354                       | 22.292                    | 22.627                  | -0.705                 | Y ●       |                        |  |
| <i>DNA repair protein RecO [Methylobacillus flagellatus KT]637937766 YP_544975</i>                        |                                            |                              |                           |                         |                        |                                               |                 |                              |                           |                         |                        |           |                        |  |
| <b>MFLA0867</b><br><b>MFLA1011</b>                                                                        | 1.77 E-5                                   | 5.926                        | 6.699                     | 7.364                   | -0.776                 | G ●● Y                                        | 1.77 E-2        | 25.985                       | 27.090                    | 27.641                  | -1.095                 | G ●       |                        |  |
| <i>pyridoxal phosphate biosynthetic protein PdxJ [Methylobacillus flagellatus KT]637937767 YP_544976</i>  |                                            |                              |                           |                         |                        |                                               |                 |                              |                           |                         |                        |           |                        |  |
| <b>MFLA0868</b><br><b>MFLA1012</b>                                                                        |                                            | 2.543                        | 1.668                     | 3.171                   | -0.340                 | Y ●● Y                                        | 3.76 E-2        | 21.173                       | 19.409                    | 21.545                  | 0.763                  | Y ●       |                        |  |
| <i>phosphopantethiene--protein transferase domain [Methylobacillus flagellatus KT]637937768 YP_544977</i> |                                            |                              |                           |                         |                        |                                               |                 |                              |                           |                         |                        |           |                        |  |
| <b>MFLA0869</b><br><b>MFLA1013</b>                                                                        |                                            | 4.046                        | 3.729                     | 4.896                   | 0.360                  | Y ●● Y                                        | 1.15 E-1        | 21.764                       | 22.174                    | 22.984                  | -0.505                 | Y ●       |                        |  |
| <i>hypothetical protein [Methylobacillus flagellatus KT]637937769 YP_544978</i>                           |                                            |                              |                           |                         |                        |                                               |                 |                              |                           |                         |                        |           |                        |  |
| <b>MFLA0870</b><br><b>MFLA1014</b>                                                                        |                                            | 0.813                        | 2.505                     | 2.894                   | -0.682                 | Y ●● Y                                        | 2.39 E-1        | 19.387                       | 20.550                    | 21.083                  | 0.011                  | Y ●       |                        |  |
| <i>UBA/THIF-type NAD/FAD binding fold [Methylobacillus flagellatus KT]637937770 YP_544979</i>             |                                            |                              |                           |                         |                        |                                               |                 |                              |                           |                         |                        |           |                        |  |
| <b>MFLA0871</b><br><b>MFLA1015</b>                                                                        | 8.51 E-2                                   | 5.554                        | 5.568                     | 6.561                   | -0.057                 | Y ●● Y                                        | 2.09 E-1        | 24.745                       | 24.579                    | 25.664                  | 0.101                  | Y ●       |                        |  |
| <i>hypothetical protein [Methylobacillus flagellatus KT]637937771 YP_544980</i>                           |                                            |                              |                           |                         |                        |                                               |                 |                              |                           |                         |                        |           |                        |  |
| <b>MFLA0872</b><br><b>MFLA1016</b>                                                                        |                                            | 3.580                        |                           | 3.580                   |                        | Y ●● Y                                        |                 | 23.886                       |                           | 23.886                  |                        | Y ●       |                        |  |
| <i>TonB-dependent receptor [Methylobacillus flagellatus KT]637937772 YP_544981</i>                        |                                            |                              |                           |                         |                        |                                               |                 |                              |                           |                         |                        |           |                        |  |
| <b>MFLA0873</b><br><b>MFLA1017</b>                                                                        | 0                                          | 9.000                        | 7.778                     | 9.515                   | 1.218                  | R ●● Y                                        | 4.58 E-3        | 28.596                       | 28.163                    | 29.396                  | 0.434                  | R ●       |                        |  |
| <i>heat shock protein Hsp90 [Methylobacillus flagellatus KT]637937773 YP_544982</i>                       |                                            |                              |                           |                         |                        |                                               |                 |                              |                           |                         |                        |           |                        |  |
| <b>MFLA0874</b><br><b>MFLA1018</b>                                                                        | 0                                          | 9.314                        | 9.739                     | 10.542                  | -0.424                 | Y ●● Y                                        | 1.7 E-1         | 30.028                       | 30.236                    | 31.136                  | -0.277                 | Y ●       |                        |  |
| <i>ribosomal protein S4 [Methylobacillus flagellatus KT]637937774 YP_544983</i>                           |                                            |                              |                           |                         |                        |                                               |                 |                              |                           |                         |                        |           |                        |  |
| <b>MFLA0875</b><br><b>MFLA1019</b>                                                                        |                                            | 0.000                        | 0.000                     |                         |                        | ●●                                            |                 | 0.000                        | 0.000                     |                         |                        | ●         |                        |  |
| <i>hypothetical protein [Methylobacillus flagellatus KT]637937775 YP_544984</i>                           |                                            |                              |                           |                         |                        |                                               |                 |                              |                           |                         |                        |           |                        |  |
| <b>MFLA0876</b><br><b>MFLA1020</b>                                                                        |                                            | 2.328                        | 4.305                     | 4.631                   | -0.957                 | Y ●● Y                                        | 2.09 E-2        | 21.895                       | 24.929                    | 25.095                  | -2.033                 | Y ●       |                        |  |
| <i>TonB-like protein [Methylobacillus flagellatus KT]637937776 YP_544985</i>                              |                                            |                              |                           |                         |                        |                                               |                 |                              |                           |                         |                        |           |                        |  |
| <b>MFLA0877</b><br><b>MFLA1021</b>                                                                        | 1.83 E-13                                  | 5.703                        | 6.972                     | 7.473                   | -1.278                 | G ●● Y                                        | 1.06 E-2        | 24.619                       | 26.508                    | 26.852                  | -2.080                 | G ●       |                        |  |
| <i>MotA/TolQ/ExbB proton channel [Methylobacillus flagellatus KT]637937777 YP_544986</i>                  |                                            |                              |                           |                         |                        |                                               |                 |                              |                           |                         |                        |           |                        |  |
| <b>MFLA0878</b><br><b>MFLA1022</b>                                                                        |                                            | 4.199                        | 4.594                     | 5.410                   | -1.635                 | Y ●● Y                                        | 2.6 E-2         | 24.043                       | 23.635                    | 24.853                  | -0.593                 | Y ●       |                        |  |
| <i>Biopolymer transport protein ExbD/TolR [Methylobacillus flagellatus KT]637937778 YP_544987</i>         |                                            |                              |                           |                         |                        |                                               |                 |                              |                           |                         |                        |           |                        |  |
| <b>MFLA0879</b><br><b>MFLA1023</b>                                                                        |                                            | 7.340                        | 7.108                     | 8.229                   | 0.152                  | Y ●● Y                                        | 2.24 E-1        | 25.989                       | 26.097                    | 27.044                  | -0.199                 | Y ●       |                        |  |
| <i>Glycogen/starch/alpha-glucan phosphorylase [Methylobacillus flagellatus KT]637937779 YP_544988</i>     |                                            |                              |                           |                         |                        |                                               |                 |                              |                           |                         |                        |           |                        |  |
| <b>MFLA0880</b><br><b>MFLA1024</b>                                                                        |                                            | 5.050                        | 4.223                     | 5.695                   | 0.797                  | Y ●● Y                                        | 2.38 E-1        | 25.208                       | 25.340                    | 26.276                  | -0.351                 | Y ●       |                        |  |
| <i>hypothetical protein [Methylobacillus flagellatus KT]637937780 YP_544989</i>                           |                                            |                              |                           |                         |                        |                                               |                 |                              |                           |                         |                        |           |                        |  |
| <b>MFLA0881</b><br><b>MFLA1025</b>                                                                        |                                            | 4.253                        | 3.102                     | 4.789                   | 1.079                  | Y ●● Y                                        | 2.63 E-1        | 22.053                       | 21.997                    | 23.026                  | -0.190                 | Y ●       |                        |  |
| <i>protein of unknown function DUF1234 [Methylobacillus flagellatus KT]637937781 YP_544990</i>            |                                            |                              |                           |                         |                        |                                               |                 |                              |                           |                         |                        |           |                        |  |

| ORF                                                                                                                                    | AM/OH <i>M. Flagellatus</i> Spectral Count |                              |                           |                         |                        | AM/OH <i>M. Flagellatus</i> Protein Intensity |          |                              |                           |                         | Spectral Count         |           | Protein Intensity |  | Log <sub>2</sub> Ratio |
|----------------------------------------------------------------------------------------------------------------------------------------|--------------------------------------------|------------------------------|---------------------------|-------------------------|------------------------|-----------------------------------------------|----------|------------------------------|---------------------------|-------------------------|------------------------|-----------|-------------------|--|------------------------|
|                                                                                                                                        | q-value                                    | log <sub>2</sub> Methylamine | log <sub>2</sub> Methanol | log <sub>2</sub> Sc Sum | log <sub>2</sub> Ratio | Regulation                                    | q-value  | log <sub>2</sub> Methylamine | log <sub>2</sub> Methanol | log <sub>2</sub> PI Sum | log <sub>2</sub> Ratio | Consensus |                   |  |                        |
| MFLA0882<br>MFLA1026                                                                                                                   |                                            | 4.397                        | 4.732                     | 5.574                   | -0.376                 | Y ●● Y                                        | 1 E-1    | 21.488                       | 22.507                    | 23.086                  | -1.205                 | Y ●       |                   |  |                        |
| <i>Glyoxalase/bleomycin resistance protein/dioxygenase [Methylobacillus flagellatus KT]637937782 YP_544991</i>                         |                                            |                              |                           |                         |                        |                                               |          |                              |                           |                         |                        |           |                   |  |                        |
| MFLA0883<br>MFLA1027                                                                                                                   |                                            | 0.000                        | 0.000                     |                         |                        | ■ ■                                           |          | 0.000                        | 0.000                     |                         |                        | ■         |                   |  |                        |
| <i>small multidrug resistance protein [Methylobacillus flagellatus KT]637937783 YP_544992</i>                                          |                                            |                              |                           |                         |                        |                                               |          |                              |                           |                         |                        |           |                   |  |                        |
| MFLA0884<br>MFLA1028                                                                                                                   |                                            | 3.819                        | 2.627                     | 4.343                   | 0.833                  | Y ●● Y                                        | 7.7 E-2  | 21.568                       | 22.304                    | 22.982                  | -1.027                 | Y ●       |                   |  |                        |
| <i>hypothetical protein [Methylobacillus flagellatus KT]637937784 YP_544993</i>                                                        |                                            |                              |                           |                         |                        |                                               |          |                              |                           |                         |                        |           |                   |  |                        |
| MFLA0885<br>MFLA1029                                                                                                                   |                                            | 3.988                        | 2.897                     | 4.543                   | 0.959                  | Y ●● Y                                        | 1.68 E-1 | 21.635                       | 21.411                    | 22.527                  | 0.172                  | Y ●       |                   |  |                        |
| <i>Endonuclease/exonuclease/phosphatase [Methylobacillus flagellatus KT]637937785 YP_544994</i>                                        |                                            |                              |                           |                         |                        |                                               |          |                              |                           |                         |                        |           |                   |  |                        |
| MFLA0886<br>MFLA1030                                                                                                                   |                                            |                              | 1.322                     | 1.322                   |                        | Y ●● Y                                        |          |                              | 20.114                    | 20.114                  |                        | Y ●       |                   |  |                        |
| <i>diguanylate cyclase (GGDEF domain) [Methylobacillus flagellatus KT]637937786 YP_544995</i>                                          |                                            |                              |                           |                         |                        |                                               |          |                              |                           |                         |                        |           |                   |  |                        |
| MFLA0887<br>MFLA1031                                                                                                                   |                                            | 1.03 E-4                     | 8.393                     | 8.729                   | 9.571                  | -0.336                                        | Y ●● Y   | 1.05 E-2                     | 27.136                    | 28.024                  | 28.647                 | -0.882    | Y ●               |  |                        |
| <i>phosphoribosylformylglycinamide synthase [Methylobacillus flagellatus KT]637937787 YP_544996</i>                                    |                                            |                              |                           |                         |                        |                                               |          |                              |                           |                         |                        |           |                   |  |                        |
| MFLA0888<br>MFLA1032                                                                                                                   |                                            | 8.21 E-5                     | 5.316                     | 4.194                   | 5.861                  | 1.087                                         | R ●● Y   | 1.96 E-1                     | 23.557                    | 23.430                  | 24.495                 | 0.144     | R ●               |  |                        |
| <i>Ankyrin [Methylobacillus flagellatus KT]637937788 YP_544997</i>                                                                     |                                            |                              |                           |                         |                        |                                               |          |                              |                           |                         |                        |           |                   |  |                        |
| MFLA0889<br>MFLA1033                                                                                                                   |                                            | 4.845                        | 3.441                     | 5.307                   | 1.029                  | Y ●● Y                                        | 8.26 E-2 | 24.024                       | 23.007                    | 24.603                  | 0.910                  | Y ●       |                   |  |                        |
| <i>" L-sorbose dehydrogenase, putative [Methylobacillus flagellatus KT]637937789 YP_544998 ""</i>                                      |                                            |                              |                           |                         |                        |                                               |          |                              |                           |                         |                        |           |                   |  |                        |
| MFLA0890<br>MFLA1034                                                                                                                   |                                            | 6.029                        | 6.466                     | 7.264                   | -0.513                 | Y ●● Y                                        | 1.88 E-1 | 25.657                       | 25.855                    | 26.759                  | -0.231                 | Y ●       |                   |  |                        |
| <i>hypothetical protein [Methylobacillus flagellatus KT]637937790 YP_544999</i>                                                        |                                            |                              |                           |                         |                        |                                               |          |                              |                           |                         |                        |           |                   |  |                        |
| MFLA0891<br>MFLA1035                                                                                                                   |                                            | 0.000                        | 0.000                     |                         |                        | ■ ■                                           |          | 0.000                        | 0.000                     |                         |                        | ■         |                   |  |                        |
| <i>Twin-arginine translocation pathway signal [Methylobacillus flagellatus KT]637937791 YP_545000</i>                                  |                                            |                              |                           |                         |                        |                                               |          |                              |                           |                         |                        |           |                   |  |                        |
| MFLA0892<br>MFLA1036                                                                                                                   |                                            | 5.081                        | 1.184                     | 5.174                   | 3.880                  | Y ●● Y                                        | 2.76 E-1 | 22.666                       | 22.678                    | 23.672                  | -0.048                 | Y ●       |                   |  |                        |
| <i>hypothetical protein [Methylobacillus flagellatus KT]637937792 YP_545001</i>                                                        |                                            |                              |                           |                         |                        |                                               |          |                              |                           |                         |                        |           |                   |  |                        |
| MFLA0893<br>MFLA1037                                                                                                                   |                                            | 2.23 E-8                     | 6.169                     | 4.993                   | 6.697                  | 1.158                                         | R ●● Y   | 1.04 E-1                     | 24.125                    | 23.704                  | 24.930                 | 0.517     | R ●               |  |                        |
| <i>Fructose-6-phosphate phosphoketolase [Methylobacillus flagellatus KT]637937793 YP_545002</i>                                        |                                            |                              |                           |                         |                        |                                               |          |                              |                           |                         |                        |           |                   |  |                        |
| MFLA0894<br>MFLA1038                                                                                                                   |                                            | 0.000                        | 0.000                     |                         |                        | ■ ■                                           |          | 0.000                        | 0.000                     |                         |                        | ■         |                   |  |                        |
| <i>hypothetical protein [Methylobacillus flagellatus KT]637937794 YP_545003</i>                                                        |                                            |                              |                           |                         |                        |                                               |          |                              |                           |                         |                        |           |                   |  |                        |
| MFLA0895<br>MFLA1039                                                                                                                   |                                            | 0.000                        | 0.000                     |                         |                        | ■ ■                                           |          | 0.000                        | 0.000                     |                         |                        | ■         |                   |  |                        |
| <i>hypothetical protein [Methylobacillus flagellatus KT]637937795 YP_545004</i>                                                        |                                            |                              |                           |                         |                        |                                               |          |                              |                           |                         |                        |           |                   |  |                        |
| MFLA0896<br>MFLA1040                                                                                                                   |                                            | 0.000                        | 0.000                     |                         |                        | ■ ■                                           |          | 0.000                        | 0.000                     |                         |                        | ■         |                   |  |                        |
| <i>Rhs element Vgr protein [Methylobacillus flagellatus KT]637937796 YP_545005</i>                                                     |                                            |                              |                           |                         |                        |                                               |          |                              |                           |                         |                        |           |                   |  |                        |
| MFLA0897<br>MFLA1041                                                                                                                   |                                            | 0.000                        | 0.000                     |                         |                        | ■ ■                                           |          | 0.000                        | 0.000                     |                         |                        | ■         |                   |  |                        |
| <i>hypothetical protein [Methylobacillus flagellatus KT]637937797 YP_545006</i>                                                        |                                            |                              |                           |                         |                        |                                               |          |                              |                           |                         |                        |           |                   |  |                        |
| MFLA0898<br>MFLA1042                                                                                                                   |                                            | 2.691                        | 2.659                     | 3.675                   | 1.064                  | Y ●● Y                                        | 4.7 E-2  | 21.428                       | 21.551                    | 22.491                  | 0.887                  | Y ●       |                   |  |                        |
| <i>protein of unknown function DUF455 [Methylobacillus flagellatus KT]637937798 YP_545007</i>                                          |                                            |                              |                           |                         |                        |                                               |          |                              |                           |                         |                        |           |                   |  |                        |
| MFLA0899<br>MFLA1043                                                                                                                   |                                            | 0.000                        | 0.000                     |                         |                        | ■ ■                                           |          | 0.000                        | 0.000                     |                         |                        | ■         |                   |  |                        |
| <i>" sigma54 specific transcriptional regulator with GAF sensor, Fis family [Methylobacillus flagellatus KT]637937799 YP_545008 ""</i> |                                            |                              |                           |                         |                        |                                               |          |                              |                           |                         |                        |           |                   |  |                        |
| MFLA0900<br>MFLA1044                                                                                                                   |                                            | 0.000                        | 0.000                     |                         |                        | ■ ■                                           |          | 0.000                        | 0.000                     |                         |                        | ■         |                   |  |                        |
| <i>metallophosphoesterase [Methylobacillus flagellatus KT]637937800 YP_545009</i>                                                      |                                            |                              |                           |                         |                        |                                               |          |                              |                           |                         |                        |           |                   |  |                        |
| MFLA0901<br>MFLA1045                                                                                                                   |                                            | 0.000                        | 0.000                     |                         |                        | ■ ■                                           |          | 0.000                        | 0.000                     |                         |                        | ■         |                   |  |                        |
| <i>" 4Fe-4S ferredoxin, iron-sulfur binding [Methylobacillus flagellatus KT]637937801 YP_545010 ""</i>                                 |                                            |                              |                           |                         |                        |                                               |          |                              |                           |                         |                        |           |                   |  |                        |
| MFLA0902<br>MFLA1046                                                                                                                   |                                            | 0.000                        | 0.000                     |                         |                        | ■ ■                                           |          | 0.000                        | 0.000                     |                         |                        | ■         |                   |  |                        |
| <i>protein of unknown function DUF498 [Methylobacillus flagellatus KT]637937802 YP_545011</i>                                          |                                            |                              |                           |                         |                        |                                               |          |                              |                           |                         |                        |           |                   |  |                        |
| MFLA0903<br>MFLA1047                                                                                                                   |                                            | 5.79 E-12                    | 6.326                     | 7.171                   | 7.810                  | -0.988                                        | G ●● Y   | 1.33 E-1                     | 25.439                    | 26.040                  | 26.771                 | -1.308    | G ●               |  |                        |
| <i>" aminotransferase, class I and II [Methylobacillus flagellatus KT]637937803 YP_545012 ""</i>                                       |                                            |                              |                           |                         |                        |                                               |          |                              |                           |                         |                        |           |                   |  |                        |

| ORF                                                                                                                                    | AM/OH <i>M. Flagellatus</i> Spectral Count |                              |                           |                         |                        |            | AM/OH <i>M. Flagellatus</i> Protein Intensity |                              |                           |                         |                        |                        | Consensus | Spectral Count |   | Protein Intensity |  |
|----------------------------------------------------------------------------------------------------------------------------------------|--------------------------------------------|------------------------------|---------------------------|-------------------------|------------------------|------------|-----------------------------------------------|------------------------------|---------------------------|-------------------------|------------------------|------------------------|-----------|----------------|---|-------------------|--|
|                                                                                                                                        | q-value                                    | log <sub>2</sub> Methylamine | log <sub>2</sub> Methanol | log <sub>2</sub> Sc Sum | log <sub>2</sub> Ratio | Regulation | q-value                                       | log <sub>2</sub> Methylamine | log <sub>2</sub> Methanol | log <sub>2</sub> PI Sum | log <sub>2</sub> Ratio | Log <sub>2</sub> Ratio |           | -7             | 0 | 7                 |  |
| <b>MFLA0904</b><br><b>MFLA1048</b>                                                                                                     | 1.15 E-2                                   | 7.439                        | 7.335                     | 8.388                   | 0.139                  | Y ●● Y     | 2.13 E-2                                      | 26.378                       | 26.968                    | 27.703                  | -0.583                 | Y ●                    |           |                |   |                   |  |
| <i>Homoserine dehydrogenase [Methylobacillus flagellatus KT]637937804 YP_545013</i>                                                    |                                            |                              |                           |                         |                        |            |                                               |                              |                           |                         |                        |                        |           |                |   |                   |  |
| <b>MFLA0905</b><br><b>MFLA1049</b>                                                                                                     | 8.35 E-9                                   | 6.731                        | 7.420                     | 8.116                   | -0.723                 | G ●● Y     | 7.33 E-2                                      | 26.819                       | 27.356                    | 28.112                  | -0.603                 | G ●                    |           |                |   |                   |  |
| <i>threonine synthase [Methylobacillus flagellatus KT]637937805 YP_545014</i>                                                          |                                            |                              |                           |                         |                        |            |                                               |                              |                           |                         |                        |                        |           |                |   |                   |  |
| <b>MFLA0906</b><br><b>MFLA1050</b>                                                                                                     | 4.258                                      | 4.783                        | 5.544                     | 5.544                   | -1.032                 | Y ●● Y     | 1.45 E-1                                      | 24.639                       | 23.584                    | 25.206                  | -0.101                 | Y ●                    |           |                |   |                   |  |
| <i>Thymidylate synthase [Methylobacillus flagellatus KT]637937806 YP_545015</i>                                                        |                                            |                              |                           |                         |                        |            |                                               |                              |                           |                         |                        |                        |           |                |   |                   |  |
| <b>MFLA0907</b><br><b>MFLA1051</b>                                                                                                     | 2.844                                      | 2.844                        | 2.844                     | 2.844                   | 2.844                  | Y ●● Y     | 20.737                                        | 20.737                       | 20.737                    | 20.737                  | 20.737                 | Y ●                    |           |                |   |                   |  |
| <i>diguanylate cyclase/phosphodiesterase (GGDEF &amp; EAL domains) [Methylobacillus flagellatus KT]637937807 YP_545016</i>             |                                            |                              |                           |                         |                        |            |                                               |                              |                           |                         |                        |                        |           |                |   |                   |  |
| <b>MFLA0908</b><br><b>MFLA1052</b>                                                                                                     | 3.692                                      | 3.826                        | 4.761                     | 4.761                   | 0.092                  | Y ●● Y     | 1.06 E-1                                      | 22.330                       | 21.986                    | 23.168                  | 0.413                  | Y ●                    |           |                |   |                   |  |
| <i>" Propeptide, PepSY amd peptidase M4 [Methylobacillus flagellatus KT]637937808 YP_545017 ""</i>                                     |                                            |                              |                           |                         |                        |            |                                               |                              |                           |                         |                        |                        |           |                |   |                   |  |
| <b>MFLA0909</b><br><b>MFLA1053</b>                                                                                                     | 0.000                                      | 0.000                        | 0.000                     | 0.000                   | 0.000                  | ●●         | 0.000                                         | 0.000                        | 0.000                     | 0.000                   | 0.000                  | ●                      |           |                |   |                   |  |
| <i>hypothetical protein [Methylobacillus flagellatus KT]637937809 YP_545018</i>                                                        |                                            |                              |                           |                         |                        |            |                                               |                              |                           |                         |                        |                        |           |                |   |                   |  |
| <b>MFLA0910</b><br><b>MFLA1054</b>                                                                                                     | 1.843                                      | 1.843                        | 1.843                     | 1.843                   | 1.843                  | Y ●● Y     | 19.059                                        | 19.059                       | 19.059                    | 19.059                  | 19.059                 | Y ●                    |           |                |   |                   |  |
| <i>hypothetical protein [Methylobacillus flagellatus KT]637937810 YP_545019</i>                                                        |                                            |                              |                           |                         |                        |            |                                               |                              |                           |                         |                        |                        |           |                |   |                   |  |
| <b>MFLA0911</b><br><b>MFLA1055</b>                                                                                                     | 5.77 E-2                                   | 5.100                        | 5.547                     | 6.341                   | -0.457                 | Y ●● Y     | 1.92 E-1                                      | 23.797                       | 24.052                    | 24.930                  | -0.477                 | Y ●                    |           |                |   |                   |  |
| <i>" two component, sigma54 specific, transcriptional regulator, Fis family [Methylobacillus flagellatus KT]637937811 YP_545020 ""</i> |                                            |                              |                           |                         |                        |            |                                               |                              |                           |                         |                        |                        |           |                |   |                   |  |
| <b>MFLA0912</b><br><b>MFLA1056</b>                                                                                                     | 2.691                                      | 0.000                        | 2.898                     | 2.898                   | 2.691                  | Y ●● Y     | 19.522                                        | 20.961                       | 21.414                    | 21.414                  | -1.439                 | Y ●                    |           |                |   |                   |  |
| <i>hypothetical protein [Methylobacillus flagellatus KT]637937812 YP_545021</i>                                                        |                                            |                              |                           |                         |                        |            |                                               |                              |                           |                         |                        |                        |           |                |   |                   |  |
| <b>MFLA0913</b><br><b>MFLA1057</b>                                                                                                     | 4.456                                      | 3.962                        | 5.230                     | 5.230                   | 0.527                  | Y ●● Y     | 2.18 E-1                                      | 22.461                       | 22.315                    | 23.389                  | 0.216                  | Y ●                    |           |                |   |                   |  |
| <i>periplasmic sensor signal transduction histidine kinase [Methylobacillus flagellatus KT]637937813 YP_545022</i>                     |                                            |                              |                           |                         |                        |            |                                               |                              |                           |                         |                        |                        |           |                |   |                   |  |
| <b>MFLA0914</b><br><b>MFLA1058</b>                                                                                                     | 1.521                                      | 0.346                        | 2.050                     | 2.050                   | 1.174                  | Y ●● Y     | 18.997                                        | 19.551                       | 20.300                    | 20.300                  | -0.554                 | Y ●                    |           |                |   |                   |  |
| <i>Dihydrofolate reductase [Methylobacillus flagellatus KT]637937814 YP_545023</i>                                                     |                                            |                              |                           |                         |                        |            |                                               |                              |                           |                         |                        |                        |           |                |   |                   |  |
| <b>MFLA0915</b><br><b>MFLA1059</b>                                                                                                     | 4.51 E-6                                   | 7.631                        | 7.053                     | 8.371                   | 0.578                  | R ●● Y     | 2.17 E-1                                      | 26.444                       | 26.357                    | 27.401                  | 0.107                  | R ●                    |           |                |   |                   |  |
| <i>Lysine decarboxylase [Methylobacillus flagellatus KT]637937815 YP_545024</i>                                                        |                                            |                              |                           |                         |                        |            |                                               |                              |                           |                         |                        |                        |           |                |   |                   |  |
| <b>MFLA0916</b><br><b>MFLA1060</b>                                                                                                     | 4.039                                      | 4.661                        | 5.384                     | 5.384                   | -0.725                 | Y ●● Y     | 4.87 E-2                                      | 23.840                       | 24.949                    | 25.498                  | -1.027                 | Y ●                    |           |                |   |                   |  |
| <i>Deoxycytidine triphosphate deaminase [Methylobacillus flagellatus KT]637937816 YP_545025</i>                                        |                                            |                              |                           |                         |                        |            |                                               |                              |                           |                         |                        |                        |           |                |   |                   |  |
| <b>MFLA0917</b><br><b>MFLA1061</b>                                                                                                     | 9.070                                      | 8.922                        | 9.998                     | 9.998                   | 0.106                  | Y ●● Y     | 1.29 E-2                                      | 28.648                       | 29.189                    | 29.944                  | -0.537                 | Y ●                    |           |                |   |                   |  |
| <i>glucose-6-phosphate 1-dehydrogenase [Methylobacillus flagellatus KT]637937817 YP_545026</i>                                         |                                            |                              |                           |                         |                        |            |                                               |                              |                           |                         |                        |                        |           |                |   |                   |  |
| <b>MFLA0918</b><br><b>MFLA1062</b>                                                                                                     | 9.861                                      | 9.496                        | 10.690                    | 10.690                  | 0.173                  | Y ●● Y     | 6.21 E-2                                      | 28.765                       | 29.539                    | 30.203                  | -0.979                 | Y ●                    |           |                |   |                   |  |
| <i>6-phosphogluconate dehydrogenase related protein [Methylobacillus flagellatus KT]637937818 YP_545027</i>                            |                                            |                              |                           |                         |                        |            |                                               |                              |                           |                         |                        |                        |           |                |   |                   |  |
| <b>MFLA0919</b><br><b>MFLA1063</b>                                                                                                     | 2.96 E-7                                   | 5.280                        | 6.391                     | 6.940                   | -1.109                 | G ●● Y     | 9.7 E-2                                       | 25.779                       | 26.204                    | 27.007                  | -0.387                 | G ●                    |           |                |   |                   |  |
| <i>6-phosphogluconolactonase [Methylobacillus flagellatus KT]637937819 YP_545028</i>                                                   |                                            |                              |                           |                         |                        |            |                                               |                              |                           |                         |                        |                        |           |                |   |                   |  |
| <b>MFLA0920</b><br><b>MFLA1064</b>                                                                                                     | 6.62 E-3                                   | 4.552                        | 5.214                     | 5.921                   | -0.636                 | G ●● Y     | 7.99 E-2                                      | 24.099                       | 24.475                    | 25.299                  | -0.365                 | G ●                    |           |                |   |                   |  |
| <i>protein of unknown function DUF59 [Methylobacillus flagellatus KT]637937820 YP_545029</i>                                           |                                            |                              |                           |                         |                        |            |                                               |                              |                           |                         |                        |                        |           |                |   |                   |  |
| <b>MFLA0921</b><br><b>MFLA1065</b>                                                                                                     | 6.742                                      | 6.719                        | 7.731                     | 7.731                   | -0.058                 | Y ●● Y     | 4.62 E-2                                      | 25.730                       | 26.246                    | 27.011                  | -0.494                 | Y ●                    |           |                |   |                   |  |
| <i>methionyl-tRNA synthetase [Methylobacillus flagellatus KT]637937821 YP_545030</i>                                                   |                                            |                              |                           |                         |                        |            |                                               |                              |                           |                         |                        |                        |           |                |   |                   |  |
| <b>MFLA0922</b><br><b>MFLA1066</b>                                                                                                     | 6.621                                      | 5.715                        | 7.238                     | 7.238                   | 0.583                  | Y ●● Y     | 2.22 E-1                                      | 25.765                       | 25.851                    | 26.809                  | -0.050                 | Y ●                    |           |                |   |                   |  |
| <i>Competence protein ComEA helix-hairpin-helix region [Methylobacillus flagellatus KT]637937822 YP_545031</i>                         |                                            |                              |                           |                         |                        |            |                                               |                              |                           |                         |                        |                        |           |                |   |                   |  |
| <b>MFLA0923</b><br><b>MFLA1067</b>                                                                                                     | 3.876                                      | 4.790                        | 5.405                     | 5.405                   | -0.937                 | Y ●● Y     | 1.66 E-2                                      | 23.537                       | 24.487                    | 25.088                  | -0.979                 | Y ●                    |           |                |   |                   |  |
| <i>orotidine 5'-phosphate decarboxylase [Methylobacillus flagellatus KT]637937823 YP_545032</i>                                        |                                            |                              |                           |                         |                        |            |                                               |                              |                           |                         |                        |                        |           |                |   |                   |  |
| <b>MFLA0924</b><br><b>MFLA1068</b>                                                                                                     | 9.98 E-2                                   | 6.351                        | 6.597                     | 7.479                   | -0.247                 | Y ●● Y     | 5.72 E-2                                      | 24.636                       | 25.110                    | 25.892                  | -0.490                 | Y ●                    |           |                |   |                   |  |
| <i>Tetrapeptide region [Methylobacillus flagellatus KT]637937824 YP_545033</i>                                                         |                                            |                              |                           |                         |                        |            |                                               |                              |                           |                         |                        |                        |           |                |   |                   |  |
| <b>MFLA0925</b><br><b>MFLA1069</b>                                                                                                     | 0.000                                      | 0.000                        | 0.000                     | 0.000                   | 0.000                  | ●●         | 0.000                                         | 0.000                        | 0.000                     | 0.000                   | 0.000                  | ●                      |           |                |   |                   |  |
| <i>hypothetical protein [Methylobacillus flagellatus KT]637937825 YP_545034</i>                                                        |                                            |                              |                           |                         |                        |            |                                               |                              |                           |                         |                        |                        |           |                |   |                   |  |

| AM/OH <i>M. Flagellatus</i> Spectral Count                                                                           |          |                                 |          |        |                        |            |          |                                    |          |        |                        |           |                | AM/OH <i>M. Flagellatus</i> Protein Intensity |                   |                        |  |  |  |  |  |  |  |  |  |  |  |
|----------------------------------------------------------------------------------------------------------------------|----------|---------------------------------|----------|--------|------------------------|------------|----------|------------------------------------|----------|--------|------------------------|-----------|----------------|-----------------------------------------------|-------------------|------------------------|--|--|--|--|--|--|--|--|--|--|--|
| ORF                                                                                                                  | q-value  | log <sub>2</sub> Spectral Count |          |        |                        | Regulation | q-value  | log <sub>2</sub> Protein Intensity |          |        |                        | Consensus | Spectral Count |                                               | Protein Intensity |                        |  |  |  |  |  |  |  |  |  |  |  |
|                                                                                                                      |          | Methylamine                     | Methanol | Sc Sum | log <sub>2</sub> Ratio |            |          | Methylamine                        | Methanol | PI Sum | log <sub>2</sub> Ratio |           | -7             | 0                                             | 7                 | Log <sub>2</sub> Ratio |  |  |  |  |  |  |  |  |  |  |  |
| MFLA0926<br>MFLA1070                                                                                                 |          | 1.813                           | 3.015    | 3.536  | -0.152                 | Y ●● Y     | 2.72 E-1 | 22.494                             | 23.470   | 24.063 | 0.130                  | Y ●       |                |                                               |                   |                        |  |  |  |  |  |  |  |  |  |  |  |
| <i>" integration host factor, beta subunit [Methylobacillus flagellatus KT]637937826 YP_545035 ""</i>                |          |                                 |          |        |                        |            |          |                                    |          |        |                        |           |                |                                               |                   |                        |  |  |  |  |  |  |  |  |  |  |  |
| MFLA0927<br>MFLA1071                                                                                                 |          | 10.718                          | 10.805   | 11.762 | -0.094                 | Y ●● Y     | 6.35 E-2 | 30.593                             | 30.888   | 31.748 | -0.306                 | Y ●       |                |                                               |                   |                        |  |  |  |  |  |  |  |  |  |  |  |
| <i>ribosomal protein S1 [Methylobacillus flagellatus KT]637937827 YP_545036</i>                                      |          |                                 |          |        |                        |            |          |                                    |          |        |                        |           |                |                                               |                   |                        |  |  |  |  |  |  |  |  |  |  |  |
| MFLA0928<br>MFLA1072                                                                                                 |          | 4.915                           | 4.972    | 5.944  | -0.059                 | Y ●● Y     | 6.87 E-2 | 22.759                             | 22.446   | 23.611 | 0.297                  | Y ●       |                |                                               |                   |                        |  |  |  |  |  |  |  |  |  |  |  |
| <i>cytidylate kinase [Methylobacillus flagellatus KT]637937828 YP_545037</i>                                         |          |                                 |          |        |                        |            |          |                                    |          |        |                        |           |                |                                               |                   |                        |  |  |  |  |  |  |  |  |  |  |  |
| MFLA0929<br>MFLA1073                                                                                                 |          | 4.184                           | 4.548    | 5.378  | -0.461                 | Y ●● Y     | 2.7 E-2  | 21.214                             | 23.169   | 23.500 | -2.217                 | Y ●       |                |                                               |                   |                        |  |  |  |  |  |  |  |  |  |  |  |
| <i>3-phosphoshikimate 1-carboxyvinyltransferase [Methylobacillus flagellatus KT]637937829 YP_545038</i>              |          |                                 |          |        |                        |            |          |                                    |          |        |                        |           |                |                                               |                   |                        |  |  |  |  |  |  |  |  |  |  |  |
| MFLA0930<br>MFLA1074                                                                                                 | 1.43 E-9 | 4.330                           | 5.992    | 6.388  | -1.918                 | G ●● Y     | 1.66 E-2 | 23.122                             | 24.510   | 24.976 | -1.366                 | G ●       |                |                                               |                   |                        |  |  |  |  |  |  |  |  |  |  |  |
| <i>Prephenate dehydrogenase [Methylobacillus flagellatus KT]637937830 YP_545039</i>                                  |          |                                 |          |        |                        |            |          |                                    |          |        |                        |           |                |                                               |                   |                        |  |  |  |  |  |  |  |  |  |  |  |
| MFLA0931<br>MFLA1075                                                                                                 |          | 0.000                           | 0.000    |        |                        | ●●         |          | 0.000                              | 0.000    |        |                        | ●         |                |                                               |                   |                        |  |  |  |  |  |  |  |  |  |  |  |
| <i>Arginyltransferase [Methylobacillus flagellatus KT]637937831 YP_545040</i>                                        |          |                                 |          |        |                        |            |          |                                    |          |        |                        |           |                |                                               |                   |                        |  |  |  |  |  |  |  |  |  |  |  |
| MFLA0932<br>MFLA1076                                                                                                 |          | 0.000                           | 0.000    |        |                        | ●●         |          | 0.000                              | 0.000    |        |                        | ●         |                |                                               |                   |                        |  |  |  |  |  |  |  |  |  |  |  |
| <i>Leucyltransferase [Methylobacillus flagellatus KT]637937832 YP_545041</i>                                         |          |                                 |          |        |                        |            |          |                                    |          |        |                        |           |                |                                               |                   |                        |  |  |  |  |  |  |  |  |  |  |  |
| MFLA0933<br>MFLA1077                                                                                                 |          | 0.000                           | 0.000    |        |                        | ●●         |          | 0.000                              | 0.000    |        |                        | ●         |                |                                               |                   |                        |  |  |  |  |  |  |  |  |  |  |  |
| <i>hypothetical protein [Methylobacillus flagellatus KT]637937833 YP_545042</i>                                      |          |                                 |          |        |                        |            |          |                                    |          |        |                        |           |                |                                               |                   |                        |  |  |  |  |  |  |  |  |  |  |  |
| MFLA0934<br>MFLA1078                                                                                                 |          | 0.000                           | 0.000    |        |                        | ●●         |          | 0.000                              | 0.000    |        |                        | ●         |                |                                               |                   |                        |  |  |  |  |  |  |  |  |  |  |  |
| <i>hypothetical protein [Methylobacillus flagellatus KT]637937834 YP_545043</i>                                      |          |                                 |          |        |                        |            |          |                                    |          |        |                        |           |                |                                               |                   |                        |  |  |  |  |  |  |  |  |  |  |  |
| MFLA0935<br>MFLA1079                                                                                                 |          | 1.843                           |          | 1.843  |                        | Y ●● Y     |          | 19.767                             |          | 19.767 |                        | Y ●       |                |                                               |                   |                        |  |  |  |  |  |  |  |  |  |  |  |
| <i>outer membrane efflux protein [Methylobacillus flagellatus KT]637937835 YP_545044</i>                             |          |                                 |          |        |                        |            |          |                                    |          |        |                        |           |                |                                               |                   |                        |  |  |  |  |  |  |  |  |  |  |  |
| MFLA0936<br>MFLA1080                                                                                                 |          | 2.843                           | 3.056    | 3.953  | 0.792                  | Y ●● Y     | 2.7 E-1  | 21.559                             | 22.544   | 23.134 | 0.042                  | Y ●       |                |                                               |                   |                        |  |  |  |  |  |  |  |  |  |  |  |
| <i>Twin-arginine translocation pathway signal [Methylobacillus flagellatus KT]637937836 YP_545045</i>                |          |                                 |          |        |                        |            |          |                                    |          |        |                        |           |                |                                               |                   |                        |  |  |  |  |  |  |  |  |  |  |  |
| MFLA0937<br>MFLA1081                                                                                                 | 3.18 E-9 | 7.135                           | 6.243    | 7.757  | 0.887                  | R ●● Y     | 6.09 E-2 | 27.047                             | 27.884   | 28.525 | -1.088                 | Y ●       |                |                                               |                   |                        |  |  |  |  |  |  |  |  |  |  |  |
| <i>Heavy metal transport/detoxification protein [Methylobacillus flagellatus KT]637937837 YP_545046</i>              |          |                                 |          |        |                        |            |          |                                    |          |        |                        |           |                |                                               |                   |                        |  |  |  |  |  |  |  |  |  |  |  |
| MFLA0938<br>MFLA1082                                                                                                 | 1.98 E-2 | 5.397                           | 4.938    | 6.186  | 0.422                  | Y ●● Y     | 2.05 E-1 | 23.922                             | 24.067   | 24.997 | -0.146                 | Y ●       |                |                                               |                   |                        |  |  |  |  |  |  |  |  |  |  |  |
| <i>Heavy metal translocating P-type ATPase [Methylobacillus flagellatus KT]637937838 YP_545047</i>                   |          |                                 |          |        |                        |            |          |                                    |          |        |                        |           |                |                                               |                   |                        |  |  |  |  |  |  |  |  |  |  |  |
| MFLA0939<br>MFLA1083                                                                                                 |          | 1.521                           | 1.184    | 2.362  | 1.347                  | Y ●● Y     | 5.5 E-2  | 19.004                             | 18.135   | 19.634 | 2.052                  | Y ●       |                |                                               |                   |                        |  |  |  |  |  |  |  |  |  |  |  |
| <i>Radical SAM [Methylobacillus flagellatus KT]637937839 YP_545048</i>                                               |          |                                 |          |        |                        |            |          |                                    |          |        |                        |           |                |                                               |                   |                        |  |  |  |  |  |  |  |  |  |  |  |
| MFLA0940<br>MFLA1084                                                                                                 |          | 0.000                           | 0.000    |        |                        | ●●         |          | 0.000                              | 0.000    |        |                        | ●         |                |                                               |                   |                        |  |  |  |  |  |  |  |  |  |  |  |
| <i>hypothetical protein [Methylobacillus flagellatus KT]637937840 YP_545049</i>                                      |          |                                 |          |        |                        |            |          |                                    |          |        |                        |           |                |                                               |                   |                        |  |  |  |  |  |  |  |  |  |  |  |
| MFLA0941<br>MFLA1085                                                                                                 |          | 2.691                           | 1.668    | 3.268  | 1.022                  | Y ●● Y     |          | 20.664                             | 19.209   | 21.113 | 1.455                  | Y ●       |                |                                               |                   |                        |  |  |  |  |  |  |  |  |  |  |  |
| <i>GCN5-related N-acetyltransferase [Methylobacillus flagellatus KT]637937841 YP_545050</i>                          |          |                                 |          |        |                        |            |          |                                    |          |        |                        |           |                |                                               |                   |                        |  |  |  |  |  |  |  |  |  |  |  |
| MFLA0942<br>MFLA1086                                                                                                 |          | 0.000                           | 0.000    |        |                        | ●●         |          | 0.000                              | 0.000    |        |                        | ●         |                |                                               |                   |                        |  |  |  |  |  |  |  |  |  |  |  |
| <i>" cytochrome d ubiquinol oxidase, subunit II [Methylobacillus flagellatus KT]637937842 YP_545051 ""</i>           |          |                                 |          |        |                        |            |          |                                    |          |        |                        |           |                |                                               |                   |                        |  |  |  |  |  |  |  |  |  |  |  |
| MFLA0943<br>MFLA1087                                                                                                 |          | 0.000                           | 0.000    |        |                        | ●●         |          | 0.000                              | 0.000    |        |                        | ●         |                |                                               |                   |                        |  |  |  |  |  |  |  |  |  |  |  |
| <i>" cytochrome bd ubiquinol oxidase, subunit I [Methylobacillus flagellatus KT]637937843 YP_545052 ""</i>           |          |                                 |          |        |                        |            |          |                                    |          |        |                        |           |                |                                               |                   |                        |  |  |  |  |  |  |  |  |  |  |  |
| MFLA0944<br>MFLA1088                                                                                                 |          | 2.328                           | 1.322    | 2.911  | 1.006                  | Y ●● Y     |          | 21.059                             | 20.637   | 21.863 | 0.422                  | Y ●       |                |                                               |                   |                        |  |  |  |  |  |  |  |  |  |  |  |
| <i>response regulator receiver domain protein (CheY-like) [Methylobacillus flagellatus KT]637937844 YP_545053</i>    |          |                                 |          |        |                        |            |          |                                    |          |        |                        |           |                |                                               |                   |                        |  |  |  |  |  |  |  |  |  |  |  |
| MFLA0945<br>MFLA1089                                                                                                 |          | 2.328                           | 1.915    | 3.136  | 1.494                  | Y ●● Y     | 1.49 E-1 | 20.161                             | 22.306   | 22.600 | -0.861                 | Y ●       |                |                                               |                   |                        |  |  |  |  |  |  |  |  |  |  |  |
| <i>" two component transcriptional regulator, LuxR family [Methylobacillus flagellatus KT]637937845 YP_545054 ""</i> |          |                                 |          |        |                        |            |          |                                    |          |        |                        |           |                |                                               |                   |                        |  |  |  |  |  |  |  |  |  |  |  |
| MFLA0946<br>MFLA1090                                                                                                 |          | 2.621                           |          | 2.621  |                        | Y ●● Y     |          | 18.956                             |          | 18.956 |                        | Y ●       |                |                                               |                   |                        |  |  |  |  |  |  |  |  |  |  |  |
| <i>hypothetical protein [Methylobacillus flagellatus KT]637937846 YP_545055</i>                                      |          |                                 |          |        |                        |            |          |                                    |          |        |                        |           |                |                                               |                   |                        |  |  |  |  |  |  |  |  |  |  |  |
| MFLA0947<br>MFLA1091                                                                                                 |          | 0.000                           | 0.000    |        |                        | ●●         |          | 0.000                              | 0.000    |        |                        | ●         |                |                                               |                   |                        |  |  |  |  |  |  |  |  |  |  |  |
| <i>protein of unknown function DUF1328 [Methylobacillus flagellatus KT]637937847 YP_545056</i>                       |          |                                 |          |        |                        |            |          |                                    |          |        |                        |           |                |                                               |                   |                        |  |  |  |  |  |  |  |  |  |  |  |

| ORF                                                                                                                | AM/OH <i>M. Flagellatus</i> Spectral Count |                              |                           |                         |                        |            | AM/OH <i>M. Flagellatus</i> Protein Intensity |                              |                           |                         |                        |           | Spectral Count         |  | Protein Intensity |  |
|--------------------------------------------------------------------------------------------------------------------|--------------------------------------------|------------------------------|---------------------------|-------------------------|------------------------|------------|-----------------------------------------------|------------------------------|---------------------------|-------------------------|------------------------|-----------|------------------------|--|-------------------|--|
|                                                                                                                    | <i>q</i> -value                            | log <sub>2</sub> Methylamine | log <sub>2</sub> Methanol | log <sub>2</sub> Sc Sum | log <sub>2</sub> Ratio | Regulation | <i>q</i> -value                               | log <sub>2</sub> Methylamine | log <sub>2</sub> Methanol | log <sub>2</sub> PI Sum | log <sub>2</sub> Ratio | Consensus | Log <sub>2</sub> Ratio |  |                   |  |
| MFLA0948<br>MFLA1092                                                                                               |                                            | 3.106                        | 3.281                     | 4.196                   | 0.847                  | Y ●● Y     | 6.2 E-2                                       | 21.795                       | 21.756                    | 22.776                  | 1.078                  | Y ●       |                        |  |                   |  |
| <i>periplasmic sensor signal transduction histidine kinase [Methylobacillus flagellatus KT]637937848 YP_545057</i> |                                            |                              |                           |                         |                        |            |                                               |                              |                           |                         |                        |           |                        |  |                   |  |
| MFLA0949<br>MFLA1093                                                                                               |                                            | 0.000                        | 0.000                     |                         |                        | ■ ■        |                                               | 0.000                        | 0.000                     |                         |                        | ■         |                        |  |                   |  |
| <i>hypothetical protein [Methylobacillus flagellatus KT]637937849 YP_545058</i>                                    |                                            |                              |                           |                         |                        |            |                                               |                              |                           |                         |                        |           |                        |  |                   |  |
| MFLA0950<br>MFLA1094                                                                                               |                                            | 0.000                        | 0.000                     |                         |                        | ■ ■        |                                               | 0.000                        | 0.000                     |                         |                        | ■         |                        |  |                   |  |
| <i>transport-associated [Methylobacillus flagellatus KT]637937850 YP_545059</i>                                    |                                            |                              |                           |                         |                        |            |                                               |                              |                           |                         |                        |           |                        |  |                   |  |
| MFLA0951<br>MFLA1095                                                                                               |                                            | 0.000                        | 0.000                     |                         |                        | ■ ■        |                                               | 0.000                        | 0.000                     |                         |                        | ■         |                        |  |                   |  |
| <i>Lipocalin-like protein [Methylobacillus flagellatus KT]637937851 YP_545060</i>                                  |                                            |                              |                           |                         |                        |            |                                               |                              |                           |                         |                        |           |                        |  |                   |  |
| MFLA0952<br>MFLA1096                                                                                               |                                            | 0.000                        | 0.000                     |                         |                        | ■ ■        |                                               | 0.000                        | 0.000                     |                         |                        | ■         |                        |  |                   |  |
| <i>protein of unknown function DUF188 [Methylobacillus flagellatus KT]637937852 YP_545061</i>                      |                                            |                              |                           |                         |                        |            |                                               |                              |                           |                         |                        |           |                        |  |                   |  |
| MFLA0953<br>MFLA1097                                                                                               |                                            | 0.000                        | 0.000                     |                         |                        | Y ●● Y     |                                               |                              | 18.572                    | 18.572                  |                        | Y ●       |                        |  |                   |  |
| <i>ATP-dependent DNA helicase RecQ [Methylobacillus flagellatus KT]637937853 YP_545062</i>                         |                                            |                              |                           |                         |                        |            |                                               |                              |                           |                         |                        |           |                        |  |                   |  |
| MFLA0954<br>MFLA1098                                                                                               |                                            | 5.611                        | 5.656                     | 6.634                   | -0.249                 | Y ●● Y     | 2.11 E-1                                      | 24.002                       | 24.274                    | 25.144                  | -0.831                 | Y ●       |                        |  |                   |  |
| <i>DEAD/DEAH box helicase-like protein [Methylobacillus flagellatus KT]637937854 YP_545063</i>                     |                                            |                              |                           |                         |                        |            |                                               |                              |                           |                         |                        |           |                        |  |                   |  |
| MFLA0955<br>MFLA1099                                                                                               |                                            | 4.586                        | 4.321                     | 5.459                   | 0.362                  | Y ●● Y     | 2.22 E-1                                      | 22.899                       | 23.045                    | 23.974                  | -0.283                 | Y ●       |                        |  |                   |  |
| <i>" Pseudouridine synthase, Rsu [Methylobacillus flagellatus KT]637937855 YP_545064 ""</i>                        |                                            |                              |                           |                         |                        |            |                                               |                              |                           |                         |                        |           |                        |  |                   |  |
| MFLA0956<br>MFLA1100                                                                                               |                                            | 4.081                        | 4.540                     | 5.329                   | -0.810                 | Y ●● Y     | 6.15 E-2                                      | 23.021                       | 23.827                    | 24.479                  | -1.053                 | Y ●       |                        |  |                   |  |
| <i>hypothetical protein [Methylobacillus flagellatus KT]637937856 YP_545065</i>                                    |                                            |                              |                           |                         |                        |            |                                               |                              |                           |                         |                        |           |                        |  |                   |  |
| MFLA0957<br>MFLA1101                                                                                               |                                            | 0.000                        | 0.000                     |                         |                        | ■ ■        |                                               | 0.000                        | 0.000                     |                         |                        | ■         |                        |  |                   |  |
| <i>hypothetical protein [Methylobacillus flagellatus KT]637937857 YP_545066</i>                                    |                                            |                              |                           |                         |                        |            |                                               |                              |                           |                         |                        |           |                        |  |                   |  |
| MFLA0958<br>MFLA1102                                                                                               |                                            | 0.000                        | 0.000                     |                         |                        | ■ ■        |                                               | 0.000                        | 0.000                     |                         |                        | ■         |                        |  |                   |  |
| <i>alkylphosphonate utilization operon protein PhnA [Methylobacillus flagellatus KT]637937858 YP_545067</i>        |                                            |                              |                           |                         |                        |            |                                               |                              |                           |                         |                        |           |                        |  |                   |  |
| MFLA0959<br>MFLA1103                                                                                               |                                            | 0.000                        | 0.000                     |                         |                        | ■ ■        |                                               | 0.000                        | 0.000                     |                         |                        | ■         |                        |  |                   |  |
| <i>Secretion chaperone CsaA [Methylobacillus flagellatus KT]637937859 YP_545068</i>                                |                                            |                              |                           |                         |                        |            |                                               |                              |                           |                         |                        |           |                        |  |                   |  |
| MFLA0960<br>MFLA1104                                                                                               |                                            | 0.813                        | 1.585                     | 2.250                   | -0.772                 | Y ●● Y     |                                               | 21.930                       | 20.064                    | 22.280                  | 1.866                  | Y ●       |                        |  |                   |  |
| <i>" Dihydroxyacetone kinase DhaK, subunit 1 [Methylobacillus flagellatus KT]637937860 YP_545069 ""</i>            |                                            |                              |                           |                         |                        |            |                                               |                              |                           |                         |                        |           |                        |  |                   |  |
| MFLA0961<br>MFLA1105                                                                                               |                                            | 1.05 E-1                     | 5.104                     | 4.917                   | 6.014                  | 0.194      | Y ●● Y                                        | 1.33 E-1                     | 24.250                    | 23.911                  | 25.090                 | 0.339     | Y ●                    |  |                   |  |
| <i>" Dihydroxyacetone kinase, subunit L [Methylobacillus flagellatus KT]637937861 YP_545070 ""</i>                 |                                            |                              |                           |                         |                        |            |                                               |                              |                           |                         |                        |           |                        |  |                   |  |
| MFLA0962<br>MFLA1106                                                                                               |                                            | 0.000                        | 0.000                     |                         |                        | ■ ■        |                                               | 0.000                        | 0.000                     |                         |                        | ■         |                        |  |                   |  |
| <i>ribose 5-phosphate isomerase [Methylobacillus flagellatus KT]637937862 YP_545071</i>                            |                                            |                              |                           |                         |                        |            |                                               |                              |                           |                         |                        |           |                        |  |                   |  |
| MFLA0963                                                                                                           |                                            | 0.000                        | 0.000                     |                         |                        | ■ ■        |                                               | 0.000                        | 0.000                     |                         |                        | ■         |                        |  |                   |  |
| <i>tRNA/rRNA methyltransferase (SpoU) [Methylobacillus flagellatus KT]637937863 YP_545072</i>                      |                                            |                              |                           |                         |                        |            |                                               |                              |                           |                         |                        |           |                        |  |                   |  |
| MFLA1107                                                                                                           |                                            | 1.521                        |                           | 1.521                   |                        | Y ●● Y     |                                               | 19.697                       |                           | 19.697                  |                        | Y ●       |                        |  |                   |  |
| <i>tRNA/rRNA methyltransferase (SpoU) [Methylobacillus flagellatus KT]637938007 YP_545216</i>                      |                                            |                              |                           |                         |                        |            |                                               |                              |                           |                         |                        |           |                        |  |                   |  |
| MFLA1108                                                                                                           |                                            | 7.77 E-5                     | 4.450                     | 5.479                   | 6.054                  | -0.979     | G ●● Y                                        | 1.53 E-2                     | 22.412                    | 23.824                  | 24.284                 | -1.392    | G ●                    |  |                   |  |
| <i>Hsp33 protein [Methylobacillus flagellatus KT]637938008 YP_545217</i>                                           |                                            |                              |                           |                         |                        |            |                                               |                              |                           |                         |                        |           |                        |  |                   |  |
| MFLA1109                                                                                                           |                                            | 0.000                        | 0.000                     |                         |                        | ■ ■        |                                               | 0.000                        | 0.000                     |                         |                        | ■         |                        |  |                   |  |
| <i>Glutamate--tRNA ligase [Methylobacillus flagellatus KT]637938009 YP_545218</i>                                  |                                            |                              |                           |                         |                        |            |                                               |                              |                           |                         |                        |           |                        |  |                   |  |
| MFLA1110                                                                                                           |                                            | 0.000                        | 0.000                     |                         |                        | ■ ■        |                                               | 0.000                        | 0.000                     |                         |                        | ■         |                        |  |                   |  |
| <i>hypothetical protein [Methylobacillus flagellatus KT]637938010 YP_545219</i>                                    |                                            |                              |                           |                         |                        |            |                                               |                              |                           |                         |                        |           |                        |  |                   |  |
| MFLA1111                                                                                                           |                                            | 4.696                        | 4.202                     | 5.470                   | 0.494                  | Y ●● Y     | 1.43 E-1                                      | 22.707                       | 23.489                    | 24.151                  | -0.773                 | Y ●       |                        |  |                   |  |
| <i>twitching motility protein [Methylobacillus flagellatus KT]637938011 YP_545220</i>                              |                                            |                              |                           |                         |                        |            |                                               |                              |                           |                         |                        |           |                        |  |                   |  |
| MFLA1112                                                                                                           |                                            | 0.521                        |                           | 0.521                   |                        | Y ●● Y     |                                               | 18.071                       |                           | 18.071                  |                        | Y ●       |                        |  |                   |  |
| <i>hypothetical protein [Methylobacillus flagellatus KT]637938012 YP_545221</i>                                    |                                            |                              |                           |                         |                        |            |                                               |                              |                           |                         |                        |           |                        |  |                   |  |

| ORF             | AM/OH <i>M. Flagellatus</i> Spectral Count                                                                                                        |                      |                   |                 |                | AM/OH <i>M. Flagellatus</i> Protein Intensity |            |                      |                   |                 | Spectral Count |           | Protein Intensity      |  |  |
|-----------------|---------------------------------------------------------------------------------------------------------------------------------------------------|----------------------|-------------------|-----------------|----------------|-----------------------------------------------|------------|----------------------|-------------------|-----------------|----------------|-----------|------------------------|--|--|
|                 | $q$ -value                                                                                                                                        | $\log_2$ Methylamine | $\log_2$ Methanol | $\log_2$ Sc Sum | $\log_2$ Ratio | Regulation                                    | $q$ -value | $\log_2$ Methylamine | $\log_2$ Methanol | $\log_2$ PI Sum | $\log_2$ Ratio | Consensus | Log <sub>2</sub> Ratio |  |  |
| <b>MFLA1113</b> |                                                                                                                                                   | 5.046                | 5.060             | 6.053           | -0.136         | Y ●●                                          | 4.99 E-2   | 23.192               | 22.573            | 23.916          | 0.628          | Y ●       |                        |  |  |
|                 | <i>protein of unknown function DUF344 [Methylobacillus flagellatus KT]637938013 YP_545222</i>                                                     |                      |                   |                 |                |                                               |            |                      |                   |                 |                |           |                        |  |  |
| <b>MFLA1114</b> |                                                                                                                                                   |                      | 2.862             | 2.862           |                | Y ●●                                          |            |                      | 21.743            | 21.743          |                | Y ●       |                        |  |  |
|                 | <i>diguanylate cyclase/phosphodiesterase (GGDEF &amp; EAL domains) with PAS/PAC sensor(s) [Methylobacillus flagellatus KT]637938014 YP_545223</i> |                      |                   |                 |                |                                               |            |                      |                   |                 |                |           |                        |  |  |
| <b>MFLA1115</b> |                                                                                                                                                   | 0.000                | 0.000             |                 |                | ■                                             |            | 0.000                | 0.000             |                 |                | ■         |                        |  |  |
|                 | <i>protein of unknown function DUF454 [Methylobacillus flagellatus KT]637938015 YP_545224</i>                                                     |                      |                   |                 |                |                                               |            |                      |                   |                 |                |           |                        |  |  |
| <b>MFLA1116</b> |                                                                                                                                                   | 4.492                | 4.710             | 5.605           | -0.203         | Y ●●                                          | 8.99 E-2   | 22.558               | 23.467            | 24.083          | -0.781         | Y ●       |                        |  |  |
|                 | <i>2-C-methyl-D-erythritol 4-phosphate cytidyltransferase [Methylobacillus flagellatus KT]637938016 YP_545225</i>                                 |                      |                   |                 |                |                                               |            |                      |                   |                 |                |           |                        |  |  |
| <b>MFLA1117</b> |                                                                                                                                                   | 3.514                | 4.257             | 4.933           | 0.494          | Y ●●                                          | 1.29 E-1   | 20.128               | 23.163            | 23.329          | -1.721         | Y ●       |                        |  |  |
|                 | <i>" 2-C-methyl-D-erythritol 2,4-cyclodiphosphate synthase [Methylobacillus flagellatus KT]637938017 YP_545226 ""</i>                             |                      |                   |                 |                |                                               |            |                      |                   |                 |                |           |                        |  |  |
| <b>MFLA1118</b> |                                                                                                                                                   | 0.000                | 0.000             |                 |                | ■                                             |            | 0.000                | 0.000             |                 |                | ■         |                        |  |  |
|                 | <i>Smr protein/MutS2 [Methylobacillus flagellatus KT]637938018 YP_545227</i>                                                                      |                      |                   |                 |                |                                               |            |                      |                   |                 |                |           |                        |  |  |
| <b>MFLA1119</b> |                                                                                                                                                   | 7.882                | 8.103             | 8.997           | -0.246         | Y ●●                                          | 9.55 E-2   | 27.872               | 28.013            | 28.944          | -0.146         | Y ●       |                        |  |  |
|                 | <i>thioredoxin reductase [Methylobacillus flagellatus KT]637938019 YP_545228</i>                                                                  |                      |                   |                 |                |                                               |            |                      |                   |                 |                |           |                        |  |  |
| <b>MFLA1120</b> |                                                                                                                                                   | 7.75 E-4             | 7.156             | 6.629           | 7.916          | 0.527                                         | R ●●       | 1.94 E-1             | 27.125            | 27.030          | 28.078         | 0.101     | R ●                    |  |  |
|                 | <i>Ferritin and Dps [Methylobacillus flagellatus KT]637938020 YP_545229</i>                                                                       |                      |                   |                 |                |                                               |            |                      |                   |                 |                |           |                        |  |  |
| <b>MFLA1121</b> |                                                                                                                                                   | 0.000                | 0.000             |                 |                | ■                                             |            | 0.000                | 0.000             |                 |                | ■         |                        |  |  |
|                 | <i>hypothetical protein [Methylobacillus flagellatus KT]637938021 YP_545230</i>                                                                   |                      |                   |                 |                |                                               |            |                      |                   |                 |                |           |                        |  |  |
| <b>MFLA1122</b> |                                                                                                                                                   | 0.000                | 0.000             |                 |                | ■                                             |            | 0.000                | 0.000             |                 |                | ■         |                        |  |  |
|                 | <i>hypothetical protein [Methylobacillus flagellatus KT]637938022 YP_545231</i>                                                                   |                      |                   |                 |                |                                               |            |                      |                   |                 |                |           |                        |  |  |
| <b>MFLA1123</b> |                                                                                                                                                   | 0.000                | 0.000             |                 |                | ■                                             |            | 0.000                | 0.000             |                 |                | ■         |                        |  |  |
|                 | <i>hypothetical protein [Methylobacillus flagellatus KT]637938023 YP_545232</i>                                                                   |                      |                   |                 |                |                                               |            |                      |                   |                 |                |           |                        |  |  |
| <b>MFLA1124</b> |                                                                                                                                                   | 4.914                | 4.638             | 5.782           | 0.152          | Y ●●                                          | 4.59 E-2   | 22.928               | 23.711            | 24.372          | -0.822         | Y ●       |                        |  |  |
|                 | <i>cell divisionFtsK/SpoIIIE [Methylobacillus flagellatus KT]637938024 YP_545233</i>                                                              |                      |                   |                 |                |                                               |            |                      |                   |                 |                |           |                        |  |  |
| <b>MFLA1125</b> |                                                                                                                                                   | 4.836                | 4.363             | 5.619           | 0.494          | Y ●●                                          | 1.17 E-1   | 23.881               | 23.252            | 24.601          | 0.455          | Y ●       |                        |  |  |
|                 | <i>outer membrane lipoprotein carrier protein LolA [Methylobacillus flagellatus KT]637938025 YP_545234</i>                                        |                      |                   |                 |                |                                               |            |                      |                   |                 |                |           |                        |  |  |
| <b>MFLA1126</b> |                                                                                                                                                   | 0.000                | 0.000             |                 |                | ■                                             |            | 0.000                | 0.000             |                 |                | ■         |                        |  |  |
|                 | <i>hypothetical protein [Methylobacillus flagellatus KT]637938026 YP_545235</i>                                                                   |                      |                   |                 |                |                                               |            |                      |                   |                 |                |           |                        |  |  |
| <b>MFLA1127</b> |                                                                                                                                                   | 0.000                | 0.000             |                 |                | ■                                             |            | 0.000                | 0.000             |                 |                | ■         |                        |  |  |
|                 | <i>hypothetical protein [Methylobacillus flagellatus KT]637938027 YP_545236</i>                                                                   |                      |                   |                 |                |                                               |            |                      |                   |                 |                |           |                        |  |  |
| <b>MFLA1128</b> |                                                                                                                                                   | 1.48 E-1             | 6.099             | 6.138           | 7.118          | -0.035                                        | Y ●●       | 1.25 E-1             | 24.126            | 24.534          | 25.345         | -0.581    | Y ●                    |  |  |
|                 | <i>" AAA ATPase, central region [Methylobacillus flagellatus KT]637938028 YP_545237 ""</i>                                                        |                      |                   |                 |                |                                               |            |                      |                   |                 |                |           |                        |  |  |
| <b>MFLA1129</b> |                                                                                                                                                   | 3.43 E-3             | 7.048             | 7.425           | 8.248          | -0.378                                        | Y ●●       | 2.13 E-1             | 26.877            | 26.672          | 27.778         | 0.014     | Y ●                    |  |  |
|                 | <i>seryl-tRNA synthetase [Methylobacillus flagellatus KT]637938029 YP_545238</i>                                                                  |                      |                   |                 |                |                                               |            |                      |                   |                 |                |           |                        |  |  |
| <b>MFLA1130</b> |                                                                                                                                                   | 0.000                | 0.000             |                 |                | ■                                             |            | 0.000                | 0.000             |                 |                | ■         |                        |  |  |
|                 | <i>sodium/hydrogen exchanger [Methylobacillus flagellatus KT]637938030 YP_545239</i>                                                              |                      |                   |                 |                |                                               |            |                      |                   |                 |                |           |                        |  |  |
| <b>MFLA1131</b> |                                                                                                                                                   | 4.126                | 3.315             | 4.777           | 0.697          | Y ●●                                          | 1.71 E-1   | 22.560               | 21.872            | 23.257          | 0.236          | Y ●       |                        |  |  |
|                 | <i>" Lytic transglycosylase, catalytic [Methylobacillus flagellatus KT]637938031 YP_545240 ""</i>                                                 |                      |                   |                 |                |                                               |            |                      |                   |                 |                |           |                        |  |  |
| <b>MFLA1132</b> |                                                                                                                                                   | 0.000                | 0.000             |                 |                | ■                                             |            | 0.000                | 0.000             |                 |                | ■         |                        |  |  |
|                 | <i>protein of unknown function DUF1555 [Methylobacillus flagellatus KT]637938032 YP_545241</i>                                                    |                      |                   |                 |                |                                               |            |                      |                   |                 |                |           |                        |  |  |
| <b>MFLA1133</b> |                                                                                                                                                   | 0.000                | 0.000             |                 |                | ■                                             |            | 0.000                | 0.000             |                 |                | ■         |                        |  |  |
|                 | <i>" protein of unknown function DUF6, transmembrane [Methylobacillus flagellatus KT]637938034 YP_545242 ""</i>                                   |                      |                   |                 |                |                                               |            |                      |                   |                 |                |           |                        |  |  |
| <b>MFLA1134</b> |                                                                                                                                                   | 0.521                |                   | 0.521           |                | Y ●●                                          |            | 15.420               |                   | 15.420          |                | Y ●       |                        |  |  |
|                 | <i>conserved hypothetical chaperone protein [Methylobacillus flagellatus KT]637938035 YP_545243</i>                                               |                      |                   |                 |                |                                               |            |                      |                   |                 |                |           |                        |  |  |

| ORF             | AM/OH <i>M. Flagellatus</i> Spectral Count                                                                                       |                      |                   |                 |                | AM/OH <i>M. Flagellatus</i> Protein Intensity |            |                      |                   |                 | Spectral Count |           | Protein Intensity      |  |
|-----------------|----------------------------------------------------------------------------------------------------------------------------------|----------------------|-------------------|-----------------|----------------|-----------------------------------------------|------------|----------------------|-------------------|-----------------|----------------|-----------|------------------------|--|
|                 | $q$ -value                                                                                                                       | $\log_2$ Methylamine | $\log_2$ Methanol | $\log_2$ Sc Sum | $\log_2$ Ratio | Regulation                                    | $q$ -value | $\log_2$ Methylamine | $\log_2$ Methanol | $\log_2$ PI Sum | $\log_2$ Ratio | Consensus | Log <sub>2</sub> Ratio |  |
| <b>MFLA1135</b> | 2.05 E-5                                                                                                                         | 7.366                | 7.750             | 8.570           | -0.428         | Y ●● Y                                        | 1.08 E-2   | 26.196               | 27.474            | 27.972          | -1.320         | Y ●       |                        |  |
|                 | <i>ABC transporter related [Methylobacillus flagellatus KT]637938036 YP_545244</i>                                               |                      |                   |                 |                |                                               |            |                      |                   |                 |                |           |                        |  |
| <b>MFLA1136</b> | 1.71 E-11                                                                                                                        | 6.032                | 7.034             | 7.618           | -1.090         | G ●● G                                        | 4.58 E-3   | 26.579               | 28.075            | 28.513          | -1.500         | G ●       |                        |  |
|                 | <i>nitroreductase [Methylobacillus flagellatus KT]637938037 YP_545245</i>                                                        |                      |                   |                 |                |                                               |            |                      |                   |                 |                |           |                        |  |
| <b>MFLA1137</b> |                                                                                                                                  | 2.267                | 2.267             |                 |                | Y ●● Y                                        |            |                      | 22.383            | 22.383          |                | Y ●       |                        |  |
|                 | <i>GreA/GreB family elongation factor [Methylobacillus flagellatus KT]637938038 YP_545246</i>                                    |                      |                   |                 |                |                                               |            |                      |                   |                 |                |           |                        |  |
| <b>MFLA1138</b> | 1.53 E-6                                                                                                                         | 7.664                | 8.078             | 8.886           | -0.381         | Y ●● Y                                        | 7.57 E-2   | 26.799               | 27.331            | 28.089          | -0.544         | Y ●       |                        |  |
|                 | <i>tryptophanyl-tRNA synthetase [Methylobacillus flagellatus KT]637938039 YP_545247</i>                                          |                      |                   |                 |                |                                               |            |                      |                   |                 |                |           |                        |  |
| <b>MFLA1139</b> | 2.81 E-3                                                                                                                         | 7.610                | 7.950             | 8.790           | -0.342         | Y ●● Y                                        | 2.65 E-2   | 27.250               | 27.982            | 28.662          | -0.785         | Y ●       |                        |  |
|                 | <i>GMP synthase-like protein [Methylobacillus flagellatus KT]637938040 YP_545248</i>                                             |                      |                   |                 |                |                                               |            |                      |                   |                 |                |           |                        |  |
| <b>MFLA1140</b> | 1.42 E-1                                                                                                                         | 5.567                | 5.754             | 6.663           | -0.187         | Y ●● G                                        | 4.29 E-3   | 25.362               | 26.044            | 26.743          | -0.682         | G ●       |                        |  |
|                 | <i>protein of unknown function DUF541 [Methylobacillus flagellatus KT]637938041 YP_545249</i>                                    |                      |                   |                 |                |                                               |            |                      |                   |                 |                |           |                        |  |
| <b>MFLA1141</b> | 1.18 E-1                                                                                                                         | 9.306                | 9.370             | 10.338          | -0.064         | Y ●● Y                                        | 8.99 E-2   | 29.517               | 29.849            | 30.693          | -0.373         | Y ●       |                        |  |
|                 | <i>inosine-5'-monophosphate dehydrogenase [Methylobacillus flagellatus KT]637938042 YP_545250</i>                                |                      |                   |                 |                |                                               |            |                      |                   |                 |                |           |                        |  |
| <b>MFLA1142</b> |                                                                                                                                  | 4.039                | 2.852             | 4.565           | 1.370          | Y ●● Y                                        | 1.99 E-2   | 22.634               | 21.792            | 23.274          | 0.837          | Y ●       |                        |  |
|                 | <i>hypothetical protein [Methylobacillus flagellatus KT]637938043 YP_545251</i>                                                  |                      |                   |                 |                |                                               |            |                      |                   |                 |                |           |                        |  |
| <b>MFLA1143</b> |                                                                                                                                  | 0.000                | 0.000             |                 |                | ●●                                            |            | 0.000                | 0.000             |                 |                | ●         |                        |  |
|                 | <i>protein of unknown function UPF0125 [Methylobacillus flagellatus KT]637938044 YP_545252</i>                                   |                      |                   |                 |                |                                               |            |                      |                   |                 |                |           |                        |  |
| <b>MFLA1144</b> |                                                                                                                                  | 3.528                | 3.528             |                 |                | Y ●● Y                                        |            |                      | 20.511            | 20.511          |                | Y ●       |                        |  |
|                 | <i>cyclase/dehydrase [Methylobacillus flagellatus KT]637938045 YP_545253</i>                                                     |                      |                   |                 |                |                                               |            |                      |                   |                 |                |           |                        |  |
| <b>MFLA1145</b> |                                                                                                                                  | 3.210                | 3.422             | 4.320           | -0.252         | Y ●● Y                                        | 2.74 E-2   | 21.134               | 22.014            | 22.640          | -0.942         | Y ●       |                        |  |
|                 | <i>SsrA-binding protein [Methylobacillus flagellatus KT]637938046 YP_545254</i>                                                  |                      |                   |                 |                |                                               |            |                      |                   |                 |                |           |                        |  |
| <b>MFLA1146</b> |                                                                                                                                  | 0.000                | 0.000             |                 |                | ●●                                            |            | 0.000                | 0.000             |                 |                | ●         |                        |  |
|                 | <i>Hemerythrin HHE cation binding region [Methylobacillus flagellatus KT]637938047 YP_545255</i>                                 |                      |                   |                 |                |                                               |            |                      |                   |                 |                |           |                        |  |
| <b>MFLA1147</b> |                                                                                                                                  | 0.000                | 0.000             |                 |                | Y ●● Y                                        |            |                      | 20.956            | 20.956          |                | Y ●       |                        |  |
|                 | <i>nuclease (SNase-like) [Methylobacillus flagellatus KT]637938048 YP_545256</i>                                                 |                      |                   |                 |                |                                               |            |                      |                   |                 |                |           |                        |  |
| <b>MFLA1148</b> |                                                                                                                                  | 2.398                | 3.417             | 3.995           | 0.111          | Y ●● Y                                        | 1.97 E-1   | 19.386               | 20.559            | 21.088          | -0.137         | Y ●       |                        |  |
|                 | <i>short-chain dehydrogenase/reductase SDR [Methylobacillus flagellatus KT]637938049 YP_545257</i>                               |                      |                   |                 |                |                                               |            |                      |                   |                 |                |           |                        |  |
| <b>MFLA1149</b> |                                                                                                                                  | 0.000                | 0.000             |                 |                | ●●                                            |            | 0.000                | 0.000             |                 |                | ●         |                        |  |
|                 | <i>" transcriptional regulator, LysR family [Methylobacillus flagellatus KT]637938050 YP_545258 ""</i>                           |                      |                   |                 |                |                                               |            |                      |                   |                 |                |           |                        |  |
| <b>MFLA1150</b> |                                                                                                                                  | 0.521                | 1.184             | 1.890           | 0.347          | Y ●● Y                                        | 1.51 E-1   | 20.175               | 21.379            | 21.899          | -0.190         | Y ●       |                        |  |
|                 | <i>hypothetical protein [Methylobacillus flagellatus KT]637938051 YP_545259</i>                                                  |                      |                   |                 |                |                                               |            |                      |                   |                 |                |           |                        |  |
| <b>MFLA1151</b> |                                                                                                                                  | 0.000                | 0.000             |                 |                | ●●                                            |            | 0.000                | 0.000             |                 |                | ●         |                        |  |
|                 | <i>hypothetical protein [Methylobacillus flagellatus KT]637938052 YP_545260</i>                                                  |                      |                   |                 |                |                                               |            |                      |                   |                 |                |           |                        |  |
| <b>MFLA1152</b> |                                                                                                                                  | 0.000                | 0.000             |                 |                | ●●                                            |            | 0.000                | 0.000             |                 |                | ●         |                        |  |
|                 | <i>hypothetical protein [Methylobacillus flagellatus KT]637938053 YP_545261</i>                                                  |                      |                   |                 |                |                                               |            |                      |                   |                 |                |           |                        |  |
| <b>MFLA1153</b> |                                                                                                                                  | 0.813                | 0.813             |                 |                | Y ●● Y                                        |            | 17.716               | 17.716            |                 |                | Y ●       |                        |  |
|                 | <i>hypothetical protein [Methylobacillus flagellatus KT]637938054 YP_545262</i>                                                  |                      |                   |                 |                |                                               |            |                      |                   |                 |                |           |                        |  |
| <b>MFLA1154</b> |                                                                                                                                  | 0.000                | 0.000             |                 |                | ●●                                            |            | 0.000                | 0.000             |                 |                | ●         |                        |  |
|                 | <i>" prophage LambdaMc01, site-specific recombinase, resolvase family [Methylobacillus flagellatus KT]637938055 YP_545263 ""</i> |                      |                   |                 |                |                                               |            |                      |                   |                 |                |           |                        |  |
| <b>MFLA1155</b> |                                                                                                                                  | 0.000                | 0.000             |                 |                | ●●                                            |            | 0.000                | 0.000             |                 |                | ●         |                        |  |
|                 | <i>Recombinase [Methylobacillus flagellatus KT]637938056 YP_545264</i>                                                           |                      |                   |                 |                |                                               |            |                      |                   |                 |                |           |                        |  |
| <b>MFLA1156</b> |                                                                                                                                  | 0.000                | 0.000             |                 |                | ●●                                            |            | 0.000                | 0.000             |                 |                | ●         |                        |  |
|                 | <i>hypothetical protein [Methylobacillus flagellatus KT]637938057 YP_545265</i>                                                  |                      |                   |                 |                |                                               |            |                      |                   |                 |                |           |                        |  |

| ORF             | AM/OH <i>M. Flagellatus</i> Spectral Count                                                                         |                      |                   |                 |                |            | AM/OH <i>M. Flagellatus</i> Protein Intensity |                      |                   |                 |                |                        | Consensus | Spectral Count |   | Protein Intensity |  |  |
|-----------------|--------------------------------------------------------------------------------------------------------------------|----------------------|-------------------|-----------------|----------------|------------|-----------------------------------------------|----------------------|-------------------|-----------------|----------------|------------------------|-----------|----------------|---|-------------------|--|--|
|                 | $q$ -value                                                                                                         | $\log_2$ Methylamine | $\log_2$ Methanol | $\log_2$ Sc Sum | $\log_2$ Ratio | Regulation | $q$ -value                                    | $\log_2$ Methylamine | $\log_2$ Methanol | $\log_2$ PI Sum | $\log_2$ Ratio | Log <sub>2</sub> Ratio |           |                |   |                   |  |  |
| <b>MFLA1157</b> |                                                                                                                    | 0.000                | 0.000             |                 |                |            |                                               | 0.000                | 0.000             |                 |                |                        |           |                |   |                   |  |  |
|                 | <i>hypothetical protein [Methylobacillus flagellatus KT]637938058 YP_545266</i>                                    |                      |                   |                 |                |            |                                               |                      |                   |                 |                |                        |           |                |   |                   |  |  |
| <b>MFLA1158</b> | 1.92 E-14                                                                                                          | 7.684                | 6.744             | 8.289           | 0.912          | R          | ●                                             | ●                    | Y                 | 2.67 E-1        | 26.508         | 26.493                 | 27.501    | -0.011         | Y | ●                 |  |  |
|                 | <i>"peptidase S1 and S6, chymotrypsin/Hap [Methylobacillus flagellatus KT]637938059 YP_545267 ""</i>               |                      |                   |                 |                |            |                                               |                      |                   |                 |                |                        |           |                |   |                   |  |  |
| <b>MFLA1159</b> |                                                                                                                    | 4.470                | 3.367             | 5.021           | 0.701          | Y          | ●                                             | ●                    | Y                 | 1.1 E-1         | 22.835         | 21.325                 | 23.269    | 0.875          | Y | ●                 |  |  |
|                 | <i>"peptidase M48, Ste24p [Methylobacillus flagellatus KT]637938060 YP_545268 ""</i>                               |                      |                   |                 |                |            |                                               |                      |                   |                 |                |                        |           |                |   |                   |  |  |
| <b>MFLA1160</b> |                                                                                                                    | 2.398                |                   | 2.398           |                | Y          | ●                                             | ●                    | Y                 |                 | 18.611         |                        | 18.611    |                | Y | ●                 |  |  |
|                 | <i>hypothetical protein [Methylobacillus flagellatus KT]637938061 YP_545269</i>                                    |                      |                   |                 |                |            |                                               |                      |                   |                 |                |                        |           |                |   |                   |  |  |
| <b>MFLA1161</b> |                                                                                                                    | 6.287                | 6.398             | 7.344           | -0.542         | Y          | ●                                             | ●                    | Y                 | 8.11 E-2        | 26.212         | 25.702                 | 26.979    | 0.462          | Y | ●                 |  |  |
|                 | <i>thioredoxin [Methylobacillus flagellatus KT]637938062 YP_545270</i>                                             |                      |                   |                 |                |            |                                               |                      |                   |                 |                |                        |           |                |   |                   |  |  |
| <b>MFLA1162</b> | 3.4 E-16                                                                                                           | 7.858                | 6.900             | 8.457           | 0.979          | R          | ●                                             | ●                    | Y                 | 5.13 E-2        | 27.606         | 26.880                 | 28.288    | 0.694          | R | ●                 |  |  |
|                 | <i>hypothetical protein [Methylobacillus flagellatus KT]637938063 YP_545271</i>                                    |                      |                   |                 |                |            |                                               |                      |                   |                 |                |                        |           |                |   |                   |  |  |
| <b>MFLA1163</b> |                                                                                                                    | 0.000                | 0.000             |                 |                |            |                                               | 0.000                | 0.000             |                 |                |                        |           |                |   |                   |  |  |
|                 | <i>hypothetical protein [Methylobacillus flagellatus KT]637938064 YP_545272</i>                                    |                      |                   |                 |                |            |                                               |                      |                   |                 |                |                        |           |                |   |                   |  |  |
| <b>MFLA1164</b> | 1.8 E-8                                                                                                            | 8.636                | 8.990             | 9.824           | -0.375         | Y          | ●                                             | ●                    | Y                 | 1.66 E-2        | 29.796         | 30.278                 | 31.057    | -0.492         | Y | ●                 |  |  |
|                 | <i>hypothetical protein [Methylobacillus flagellatus KT]637938065 YP_545273</i>                                    |                      |                   |                 |                |            |                                               |                      |                   |                 |                |                        |           |                |   |                   |  |  |
| <b>MFLA1165</b> |                                                                                                                    | 0.000                | 0.000             |                 |                |            |                                               | 0.000                | 0.000             |                 |                |                        |           |                |   |                   |  |  |
|                 | <i>hypothetical protein [Methylobacillus flagellatus KT]637938066 YP_545274</i>                                    |                      |                   |                 |                |            |                                               |                      |                   |                 |                |                        |           |                |   |                   |  |  |
| <b>MFLA1166</b> |                                                                                                                    | 0.000                | 0.000             |                 |                |            |                                               | 0.000                | 0.000             |                 |                |                        |           |                |   |                   |  |  |
|                 | <i>heat shock protein Hsp20 [Methylobacillus flagellatus KT]637938067 YP_545275</i>                                |                      |                   |                 |                |            |                                               |                      |                   |                 |                |                        |           |                |   |                   |  |  |
| <b>MFLA1167</b> |                                                                                                                    | 0.000                | 0.000             |                 |                |            |                                               | 0.000                | 0.000             |                 |                |                        |           |                |   |                   |  |  |
|                 | <i>hypothetical protein [Methylobacillus flagellatus KT]637938068 YP_545276</i>                                    |                      |                   |                 |                |            |                                               |                      |                   |                 |                |                        |           |                |   |                   |  |  |
| <b>MFLA1168</b> | 2.33 E-2                                                                                                           | 7.679                | 7.553             | 8.617           | 0.122          | Y          | ●                                             | ●                    | Y                 | 8.09 E-2        | 26.759         | 27.136                 | 27.960    | -0.412         | Y | ●                 |  |  |
|                 | <i>ATP-dependent metalloprotease FtsH [Methylobacillus flagellatus KT]637938069 YP_545277</i>                      |                      |                   |                 |                |            |                                               |                      |                   |                 |                |                        |           |                |   |                   |  |  |
| <b>MFLA1169</b> | 3.63 E-2                                                                                                           | 6.830                | 6.484             | 7.668           | 0.347          | Y          | ●                                             | ●                    | Y                 | 2.81 E-2        | 26.249         | 26.507                 | 27.384    | -0.260         | Y | ●                 |  |  |
|                 | <i>phospholipase D/Transphosphatidylase [Methylobacillus flagellatus KT]637938070 YP_545278</i>                    |                      |                   |                 |                |            |                                               |                      |                   |                 |                |                        |           |                |   |                   |  |  |
| <b>MFLA1170</b> |                                                                                                                    | 10.684               | 10.698            | 11.691          | -0.011         | Y          | ●                                             | ●                    | Y                 | 1.68 E-2        | 30.420         | 30.886                 | 31.672    | -0.463         | Y | ●                 |  |  |
|                 | <i>ATPase AAA-2 [Methylobacillus flagellatus KT]637938071 YP_545279</i>                                            |                      |                   |                 |                |            |                                               |                      |                   |                 |                |                        |           |                |   |                   |  |  |
| <b>MFLA1171</b> |                                                                                                                    | 10.145               | 10.069            | 11.108          | 0.088          | Y          | ●                                             | ●                    | Y                 | 2.3 E-1         | 31.704         | 31.804                 | 32.755    | -0.103         | Y | ●                 |  |  |
|                 | <i>heat shock protein Hsp20 [Methylobacillus flagellatus KT]637938072 YP_545280</i>                                |                      |                   |                 |                |            |                                               |                      |                   |                 |                |                        |           |                |   |                   |  |  |
| <b>MFLA1172</b> |                                                                                                                    | 4.135                | 2.659             | 4.578           | 2.509          | Y          | ●                                             | ●                    | Y                 | 5.86 E-2        | 21.479         | 21.615                 | 22.549    | 0.882          | Y | ●                 |  |  |
|                 | <i>"phage transcriptional regulator, AlpA [Methylobacillus flagellatus KT]637938073 YP_545281 ""</i>               |                      |                   |                 |                |            |                                               |                      |                   |                 |                |                        |           |                |   |                   |  |  |
| <b>MFLA1173</b> |                                                                                                                    | 0.000                | 0.000             |                 |                |            |                                               | 0.000                | 0.000             |                 |                |                        |           |                |   |                   |  |  |
|                 | <i>phospholipase D/Transphosphatidylase [Methylobacillus flagellatus KT]637938074 YP_545282</i>                    |                      |                   |                 |                |            |                                               |                      |                   |                 |                |                        |           |                |   |                   |  |  |
| <b>MFLA1174</b> |                                                                                                                    | 0.000                | 0.000             |                 |                |            |                                               | 0.000                | 0.000             |                 |                |                        |           |                |   |                   |  |  |
|                 | <i>protein of unknown function DUF45 [Methylobacillus flagellatus KT]637938075 YP_545283</i>                       |                      |                   |                 |                |            |                                               |                      |                   |                 |                |                        |           |                |   |                   |  |  |
| <b>MFLA1175</b> |                                                                                                                    | 4.769                | 4.638             | 5.705           | 0.053          | Y          | ●                                             | ●                    | Y                 | 8.26 E-2        | 22.655         | 23.581                 | 24.191    | -1.160         | Y | ●                 |  |  |
|                 | <i>"type I site-specific deoxyribonuclease, HsdR family [Methylobacillus flagellatus KT]637938076 YP_545284 ""</i> |                      |                   |                 |                |            |                                               |                      |                   |                 |                |                        |           |                |   |                   |  |  |
| <b>MFLA1176</b> |                                                                                                                    | 3.523                | 2.844             | 4.223           | 0.579          | Y          | ●                                             | ●                    | Y                 | 1.47 E-1        | 21.495         | 21.076                 | 22.301    | 0.438          | Y | ●                 |  |  |
|                 | <i>restriction modification system DNA specificity domain [Methylobacillus flagellatus KT]637938077 YP_545285</i>  |                      |                   |                 |                |            |                                               |                      |                   |                 |                |                        |           |                |   |                   |  |  |
| <b>MFLA1177</b> |                                                                                                                    | 4.774                | 4.972             | 5.877           | -0.205         | Y          | ●                                             | ●                    | Y                 | 1.17 E-2        | 22.654         | 23.574                 | 24.186    | -0.952         | Y | ●                 |  |  |
|                 | <i>"transcriptional regulator, XRE family [Methylobacillus flagellatus KT]637938078 YP_545286 ""</i>               |                      |                   |                 |                |            |                                               |                      |                   |                 |                |                        |           |                |   |                   |  |  |
| <b>MFLA1178</b> |                                                                                                                    | 0.000                | 0.000             |                 |                |            |                                               | 0.000                | 0.000             |                 |                |                        |           |                |   |                   |  |  |
|                 | <i>hypothetical protein [Methylobacillus flagellatus KT]637938079 YP_545287</i>                                    |                      |                   |                 |                |            |                                               |                      |                   |                 |                |                        |           |                |   |                   |  |  |



| ORF             | AM/OH <i>M. Flagellatus</i> Spectral Count                                                                                                                    |                      |                   |                 |                |            | AM/OH <i>M. Flagellatus</i> Protein Intensity |                      |                   |                 |                |           | Spectral Count         |                        | Protein Intensity |  |
|-----------------|---------------------------------------------------------------------------------------------------------------------------------------------------------------|----------------------|-------------------|-----------------|----------------|------------|-----------------------------------------------|----------------------|-------------------|-----------------|----------------|-----------|------------------------|------------------------|-------------------|--|
|                 | $q$ -value                                                                                                                                                    | $\log_2$ Methylamine | $\log_2$ Methanol | $\log_2$ Sc Sum | $\log_2$ Ratio | Regulation | $q$ -value                                    | $\log_2$ Methylamine | $\log_2$ Methanol | $\log_2$ PI Sum | $\log_2$ Ratio | Consensus | Log <sub>2</sub> Ratio | Log <sub>2</sub> Ratio |                   |  |
| <b>MFLA1179</b> |                                                                                                                                                               | 2.135                |                   | 2.135           |                | Y ●● Y     |                                               | 19.117               |                   | 19.117          |                | Y ●       |                        |                        |                   |  |
|                 | <i>hypothetical protein [Methylobacillus flagellatus KT]637938080 YP_545288</i>                                                                               |                      |                   |                 |                |            |                                               |                      |                   |                 |                |           |                        |                        |                   |  |
| <b>MFLA1180</b> |                                                                                                                                                               | 0.000                | 0.000             |                 |                | ■●■        |                                               | 0.000                |                   | 0.000           |                | ■         |                        |                        |                   |  |
|                 | <i>" transcriptional regulator, AraC family [Methylobacillus flagellatus KT]637938081 YP_545289 ""</i>                                                        |                      |                   |                 |                |            |                                               |                      |                   |                 |                |           |                        |                        |                   |  |
| <b>MFLA1181</b> |                                                                                                                                                               | 0.000                | 0.000             |                 |                | ■●■        |                                               | 0.000                |                   | 0.000           |                | ■         |                        |                        |                   |  |
|                 | <i>hypothetical protein [Methylobacillus flagellatus KT]637938082 YP_545290</i>                                                                               |                      |                   |                 |                |            |                                               |                      |                   |                 |                |           |                        |                        |                   |  |
| <b>MFLA1182</b> | 1.674                                                                                                                                                         | 2.941                | 3.442             | -1.252          | Y ●● Y         | 2.36 E-1   | 21.300                                        | 21.367               | 22.334            | -0.093          | Y ●            |           |                        |                        |                   |  |
|                 | <i>filamentation induced by cAMP protein Fic [Methylobacillus flagellatus KT]637938083 YP_545291</i>                                                          |                      |                   |                 |                |            |                                               |                      |                   |                 |                |           |                        |                        |                   |  |
| <b>MFLA1183</b> | 6.012                                                                                                                                                         | 6.562                | 7.313             | -0.626          | Y ●● Y         | 1.12 E-1   | 23.605                                        | 24.379               | 25.043            | -0.992          | Y ●            |           |                        |                        |                   |  |
|                 | <i>response regulator receiver modulated diguanylate cyclase/phosphodiesterase with PAS/PAC sensor(s) [Methylobacillus flagellatus KT]637938084 YP_545292</i> |                      |                   |                 |                |            |                                               |                      |                   |                 |                |           |                        |                        |                   |  |
| <b>MFLA1184</b> | 3.259                                                                                                                                                         | 4.353                | 4.908             | -1.091          | Y ●● G         | 6.42 E-3   | 21.621                                        | 23.940               | 24.204            | -2.330          | G ●            |           |                        |                        |                   |  |
|                 | <i>histidine kinase [Methylobacillus flagellatus KT]637938085 YP_545293</i>                                                                                   |                      |                   |                 |                |            |                                               |                      |                   |                 |                |           |                        |                        |                   |  |
| <b>MFLA1185</b> | 6.75 E-9                                                                                                                                                      | 5.546                | 3.966             | 5.962           | 1.397          | R ●● Y     | 5.13 E-2                                      | 24.068               | 22.758            | 24.557          | 1.208          | R ●       |                        |                        |                   |  |
|                 | <i>thioredoxin-related [Methylobacillus flagellatus KT]637938086 YP_545294</i>                                                                                |                      |                   |                 |                |            |                                               |                      |                   |                 |                |           |                        |                        |                   |  |
| <b>MFLA1186</b> | 3.954                                                                                                                                                         | 2.897                | 4.520             | 0.298           | Y ●● Y         | 1.44 E-1   | 23.305                                        | 22.717               | 24.041            | 0.321           | Y ●            |           |                        |                        |                   |  |
|                 | <i>alkyl hydroperoxide reductase/ Thiol specific antioxidant/ Mal allergen [Methylobacillus flagellatus KT]637938087 YP_545295</i>                            |                      |                   |                 |                |            |                                               |                      |                   |                 |                |           |                        |                        |                   |  |
| <b>MFLA1187</b> | 0.000                                                                                                                                                         | 0.000                |                   |                 |                | ■●■        |                                               | 0.000                |                   | 0.000           |                | ■         |                        |                        |                   |  |
|                 | <i>hypothetical protein [Methylobacillus flagellatus KT]637938090 YP_545296</i>                                                                               |                      |                   |                 |                |            |                                               |                      |                   |                 |                |           |                        |                        |                   |  |
| <b>MFLA1188</b> | 0                                                                                                                                                             | 7.483                | 5.675             | 7.846           | 1.758          | R ●● Y     | 1.59 E-1                                      | 25.457               | 25.127            | 26.302          | 0.228          | R ●       |                        |                        |                   |  |
|                 | <i>cold-shock DNA-binding domain protein [Methylobacillus flagellatus KT]637938091 YP_545297</i>                                                              |                      |                   |                 |                |            |                                               |                      |                   |                 |                |           |                        |                        |                   |  |
| <b>MFLA1189</b> | 2.746                                                                                                                                                         | 0.000                | 2.946             | 1.459           | Y ●● Y         | 9.14 E-2   | 20.899                                        | 19.363               | 21.326            | 0.523           | Y ●            |           |                        |                        |                   |  |
|                 | <i>Glycogen debranching enzyme GlgX [Methylobacillus flagellatus KT]637938092 YP_545298</i>                                                                   |                      |                   |                 |                |            |                                               |                      |                   |                 |                |           |                        |                        |                   |  |
| <b>MFLA1190</b> | 0.000                                                                                                                                                         | 0.000                |                   |                 |                | ■●■        |                                               | 0.000                |                   | 0.000           |                | ■         |                        |                        |                   |  |
|                 | <i>hypothetical protein [Methylobacillus flagellatus KT]637938093 YP_545299</i>                                                                               |                      |                   |                 |                |            |                                               |                      |                   |                 |                |           |                        |                        |                   |  |
| <b>MFLA1191</b> | 0.000                                                                                                                                                         | 0.000                |                   |                 |                | ■●■        |                                               | 0.000                |                   | 0.000           |                | ■         |                        |                        |                   |  |
|                 | <i>hypothetical protein [Methylobacillus flagellatus KT]637938094 YP_545300</i>                                                                               |                      |                   |                 |                |            |                                               |                      |                   |                 |                |           |                        |                        |                   |  |
| <b>MFLA1192</b> | 0.000                                                                                                                                                         | 0.000                |                   |                 |                | ■●■        |                                               | 0.000                |                   | 0.000           |                | ■         |                        |                        |                   |  |
|                 | <i>ABC transporter related [Methylobacillus flagellatus KT]637938095 YP_545301</i>                                                                            |                      |                   |                 |                |            |                                               |                      |                   |                 |                |           |                        |                        |                   |  |
| <b>MFLA1193</b> | 0.000                                                                                                                                                         | 0.000                |                   |                 |                | ■●■        |                                               | 0.000                |                   | 0.000           |                | ■         |                        |                        |                   |  |
|                 | <i>hypothetical protein [Methylobacillus flagellatus KT]637938096 YP_545302</i>                                                                               |                      |                   |                 |                |            |                                               |                      |                   |                 |                |           |                        |                        |                   |  |
| <b>MFLA1194</b> | 0.000                                                                                                                                                         | 0.000                |                   |                 |                | ■●■        |                                               | 0.000                |                   | 0.000           |                | ■         |                        |                        |                   |  |
|                 | <i>UDP-galactopyranose mutase [Methylobacillus flagellatus KT]637938097 YP_545303</i>                                                                         |                      |                   |                 |                |            |                                               |                      |                   |                 |                |           |                        |                        |                   |  |
| <b>MFLA1195</b> | 0.000                                                                                                                                                         | 0.000                |                   |                 |                | ■●■        |                                               | 0.000                |                   | 0.000           |                | ■         |                        |                        |                   |  |
|                 | <i>hypothetical protein [Methylobacillus flagellatus KT]637938098 YP_545304</i>                                                                               |                      |                   |                 |                |            |                                               |                      |                   |                 |                |           |                        |                        |                   |  |
| <b>MFLA1196</b> | 1.25 E-1                                                                                                                                                      | 5.512                | 5.328             | 6.423           | 0.199          | Y ●● Y     | 2.87 E-2                                      | 22.488               | 24.183            | 24.572          | -1.913         | Y ●       |                        |                        |                   |  |
|                 | <i>FAD-dependent pyridine nucleotide-disulphide oxidoreductase [Methylobacillus flagellatus KT]637938100 YP_545305</i>                                        |                      |                   |                 |                |            |                                               |                      |                   |                 |                |           |                        |                        |                   |  |
| <b>MFLA1197</b> | 1.48 E-11                                                                                                                                                     | 7.450                | 8.163             | 8.850           | -0.716         | G ●● Y     | 2.81 E-2                                      | 26.790               | 27.487            | 28.180          | -0.714         | G ●       |                        |                        |                   |  |
|                 | <i>alkyl hydroperoxide reductase/ Thiol specific antioxidant/ Mal allergen [Methylobacillus flagellatus KT]637938101 YP_545306</i>                            |                      |                   |                 |                |            |                                               |                      |                   |                 |                |           |                        |                        |                   |  |
| <b>MFLA1198</b> | 0.000                                                                                                                                                         | 0.000                |                   |                 |                | ■●■        |                                               | 0.000                |                   | 0.000           |                | ■         |                        |                        |                   |  |
|                 | <i>diguanylate cyclase (GGDEF domain) [Methylobacillus flagellatus KT]637938102 YP_545307</i>                                                                 |                      |                   |                 |                |            |                                               |                      |                   |                 |                |           |                        |                        |                   |  |
| <b>MFLA1199</b> | 4.605                                                                                                                                                         | 4.754                | 5.681             | -0.151          | Y ●● Y         | 2.39 E-1   | 23.001                                        | 23.128               | 24.066            | -0.268          | Y ●            |           |                        |                        |                   |  |
|                 | <i>ABC transporter related [Methylobacillus flagellatus KT]637938103 YP_545308</i>                                                                            |                      |                   |                 |                |            |                                               |                      |                   |                 |                |           |                        |                        |                   |  |
| <b>MFLA1200</b> | 4.571                                                                                                                                                         | 4.154                | 5.378             | 0.450           | Y ●● Y         | 1.93 E-1   | 21.287                                        | 21.498               | 22.397            | -0.199          | Y ●            |           |                        |                        |                   |  |
|                 | <i>AsmA [Methylobacillus flagellatus KT]637938104 YP_545309</i>                                                                                               |                      |                   |                 |                |            |                                               |                      |                   |                 |                |           |                        |                        |                   |  |

| ORF             | AM/OH <i>M. Flagellatus</i> Spectral Count                                                                          |                      |                   |                 |                 |            | AM/OH <i>M. Flagellatus</i> Protein Intensity |                      |                   |                 |                 |           | Spectral Count         |   | Protein Intensity |  |
|-----------------|---------------------------------------------------------------------------------------------------------------------|----------------------|-------------------|-----------------|-----------------|------------|-----------------------------------------------|----------------------|-------------------|-----------------|-----------------|-----------|------------------------|---|-------------------|--|
|                 | $q$ -value                                                                                                          | $\log_2$ Methylamine | $\log_2$ Methanol | $\log_2$ Sc Sum | $\log_2$ -Ratio | Regulation | $q$ -value                                    | $\log_2$ Methylamine | $\log_2$ Methanol | $\log_2$ PI Sum | $\log_2$ -Ratio | Consensus | Log <sub>2</sub> Ratio |   |                   |  |
| <b>MFLA1201</b> |                                                                                                                     | 0.000                | 0.000             |                 |                 |            |                                               | 0.000                | 0.000             |                 |                 |           |                        |   |                   |  |
|                 | <i>major facilitator superfamily MFS_1 [Methylobacillus flagellatus KT]637938105 YP_545310</i>                      |                      |                   |                 |                 |            |                                               |                      |                   |                 |                 |           |                        |   |                   |  |
| <b>MFLA1202</b> |                                                                                                                     | 0.000                | 0.000             |                 |                 |            |                                               | 0.000                | 0.000             |                 |                 |           |                        |   |                   |  |
|                 | <i>UvrD/REP helicase [Methylobacillus flagellatus KT]637938106 YP_545311</i>                                        |                      |                   |                 |                 |            |                                               |                      |                   |                 |                 |           |                        |   |                   |  |
| <b>MFLA1203</b> |                                                                                                                     | 0.000                | 0.000             |                 |                 |            |                                               | 0.000                | 0.000             |                 |                 |           |                        |   |                   |  |
|                 | <i>protein of unknown function DUF1555 [Methylobacillus flagellatus KT]637938107 YP_545312</i>                      |                      |                   |                 |                 |            |                                               |                      |                   |                 |                 |           |                        |   |                   |  |
| <b>MFLA1204</b> | 3.461                                                                                                               | 4.410                | 5.012             | -0.914          | Y               | ●●         | Y                                             | 4.72 E-2             | 22.346            | 23.045          | 23.737          | -0.660    | Y                      | ● |                   |  |
|                 | <i>GTP-binding [Methylobacillus flagellatus KT]637938108 YP_545313</i>                                              |                      |                   |                 |                 |            |                                               |                      |                   |                 |                 |           |                        |   |                   |  |
| <b>MFLA1205</b> |                                                                                                                     | 0.000                | 0.000             |                 |                 |            |                                               | 0.000                | 0.000             |                 |                 |           |                        |   |                   |  |
|                 | <i>hypothetical protein [Methylobacillus flagellatus KT]637938109 YP_545314</i>                                     |                      |                   |                 |                 |            |                                               |                      |                   |                 |                 |           |                        |   |                   |  |
| <b>MFLA1206</b> |                                                                                                                     | 0.000                | 0.000             |                 |                 |            |                                               | 0.000                | 0.000             |                 |                 |           |                        |   |                   |  |
|                 | <i>Alkaline phosphatase [Methylobacillus flagellatus KT]637938110 YP_545315</i>                                     |                      |                   |                 |                 |            |                                               |                      |                   |                 |                 |           |                        |   |                   |  |
| <b>MFLA1207</b> |                                                                                                                     | 0.000                | 0.000             |                 |                 |            |                                               | 0.000                | 0.000             |                 |                 |           |                        |   |                   |  |
|                 | <i>hypothetical protein [Methylobacillus flagellatus KT]637938111 YP_545316</i>                                     |                      |                   |                 |                 |            |                                               |                      |                   |                 |                 |           |                        |   |                   |  |
| <b>MFLA1208</b> | 1.521                                                                                                               | 1.915                | 2.731             | 0.686           | Y               | ●●         | Y                                             | 2.93 E-2             | 20.471            | 20.943          | 21.726          | 0.529     | Y                      | ● |                   |  |
|                 | <i>hypothetical protein [Methylobacillus flagellatus KT]637938112 YP_545317</i>                                     |                      |                   |                 |                 |            |                                               |                      |                   |                 |                 |           |                        |   |                   |  |
| <b>MFLA1209</b> |                                                                                                                     | 0.000                | 0.000             |                 |                 |            |                                               | 0.000                | 0.000             |                 |                 |           |                        |   |                   |  |
|                 | <i>ribonuclease BN [Methylobacillus flagellatus KT]637938113 YP_545318</i>                                          |                      |                   |                 |                 |            |                                               |                      |                   |                 |                 |           |                        |   |                   |  |
| <b>MFLA1210</b> | 2.62 E-16                                                                                                           | 6.305                | 5.458             | 6.943           | 1.902           | R          | ●●                                            | Y                    | 1.02 E-1          | 22.132          | 22.683          | 23.434    | 0.474                  | R | ●                 |  |
|                 | <i>protein of unknown function DUF461 [Methylobacillus flagellatus KT]637938114 YP_545319</i>                       |                      |                   |                 |                 |            |                                               |                      |                   |                 |                 |           |                        |   |                   |  |
| <b>MFLA1211</b> |                                                                                                                     | 0.000                | 0.000             |                 |                 |            |                                               | 0.000                | 0.000             |                 |                 |           |                        |   |                   |  |
|                 | <i>hypothetical protein [Methylobacillus flagellatus KT]637938115 YP_545320</i>                                     |                      |                   |                 |                 |            |                                               |                      |                   |                 |                 |           |                        |   |                   |  |
| <b>MFLA1212</b> | 1.65 E-2                                                                                                            | 5.764                | 6.271             | 7.040           | -0.505          | Y          | ●●                                            | Y                    | 4.58 E-2          | 24.256          | 24.912          | 25.621    | -0.709                 | Y | ●                 |  |
|                 | <i>ATP-dependent helicase HrpA [Methylobacillus flagellatus KT]637938116 YP_545321</i>                              |                      |                   |                 |                 |            |                                               |                      |                   |                 |                 |           |                        |   |                   |  |
| <b>MFLA1213</b> |                                                                                                                     | 3.427                | 0.585             | 3.616           | 2.843           | Y          | ●●                                            | Y                    | 22.137            | 19.207          | 22.315          | 2.930     | Y                      | ● |                   |  |
|                 | <i>Lytic murein transglycosylase [Methylobacillus flagellatus KT]637938117 YP_545322</i>                            |                      |                   |                 |                 |            |                                               |                      |                   |                 |                 |           |                        |   |                   |  |
| <b>MFLA1214</b> | 1.95 E-2                                                                                                            | 8.031                | 8.149             | 9.091           | -0.121          | Y          | ●●                                            | Y                    | 1.04 E-1          | 26.051          | 26.256          | 27.157    | -0.217                 | Y | ●                 |  |
|                 | <i>oxidoreductase-like protein [Methylobacillus flagellatus KT]637938118 YP_545323</i>                              |                      |                   |                 |                 |            |                                               |                      |                   |                 |                 |           |                        |   |                   |  |
| <b>MFLA1215</b> | 5.49 E-2                                                                                                            | 7.056                | 7.160             | 8.109           | -0.115          | Y          | ●●                                            | G                    | 4.29 E-3          | 25.602          | 26.316          | 27.002    | -0.715                 | G | ●                 |  |
|                 | <i>" type I site-specific deoxyribonuclease, HsdR family [Methylobacillus flagellatus KT]637938119 YP_545324 ""</i> |                      |                   |                 |                 |            |                                               |                      |                   |                 |                 |           |                        |   |                   |  |
| <b>MFLA1216</b> | 9.72 E-2                                                                                                            | 5.077                | 5.261             | 6.172           | -0.310          | Y          | ●●                                            | Y                    | 4.93 E-2          | 23.935          | 24.438          | 25.208    | -0.549                 | Y | ●                 |  |
|                 | <i>restriction modification system DNA specificity domain [Methylobacillus flagellatus KT]637938120 YP_545325</i>   |                      |                   |                 |                 |            |                                               |                      |                   |                 |                 |           |                        |   |                   |  |
| <b>MFLA1217</b> |                                                                                                                     | 4.160                | 3.820             | 5.000           | 0.286           | Y          | ●●                                            | Y                    | 4.5 E-2           | 21.876          | 21.366          | 22.644    | 0.494                  | Y | ●                 |  |
|                 | <i>hypothetical protein [Methylobacillus flagellatus KT]637938121 YP_545326</i>                                     |                      |                   |                 |                 |            |                                               |                      |                   |                 |                 |           |                        |   |                   |  |
| <b>MFLA1218</b> | 3.82 E-2                                                                                                            | 5.569                | 5.965             | 6.780           | -0.404          | Y          | ●●                                            | Y                    | 1.13 E-2          | 23.645          | 24.814          | 25.345    | -1.208                 | Y | ●                 |  |
|                 | <i>DEAD/DEAH box helicase-like protein [Methylobacillus flagellatus KT]637938122 YP_545327</i>                      |                      |                   |                 |                 |            |                                               |                      |                   |                 |                 |           |                        |   |                   |  |
| <b>MFLA1219</b> |                                                                                                                     | 1.521                | 2.170             | 2.881           | -0.649          | Y          | ●●                                            | Y                    | 19.071            | 19.836          | 20.504          | -0.765    | Y                      | ● |                   |  |
|                 | <i>anticodon nuclease [Methylobacillus flagellatus KT]637938123 YP_545328</i>                                       |                      |                   |                 |                 |            |                                               |                      |                   |                 |                 |           |                        |   |                   |  |
| <b>MFLA1220</b> | 6.62 E-2                                                                                                            | 6.568                | 6.836             | 7.708           | -0.272          | Y          | ●●                                            | Y                    | 1.41 E-2          | 25.509          | 26.163          | 26.873    | -0.653                 | Y | ●                 |  |
|                 | <i>" type I restriction-modification system, M subunit [Methylobacillus flagellatus KT]637938124 YP_545329 ""</i>   |                      |                   |                 |                 |            |                                               |                      |                   |                 |                 |           |                        |   |                   |  |
| <b>MFLA1221</b> |                                                                                                                     | 0.000                | 0.000             |                 |                 |            |                                               | 0.000                | 0.000             |                 |                 |           |                        |   |                   |  |
|                 | <i>crcB protein [Methylobacillus flagellatus KT]637938125 YP_545330</i>                                             |                      |                   |                 |                 |            |                                               |                      |                   |                 |                 |           |                        |   |                   |  |
| <b>MFLA1222</b> |                                                                                                                     | 0.000                | 0.000             |                 |                 |            |                                               | 0.000                | 0.000             |                 |                 |           |                        |   |                   |  |
|                 | <i>thioredoxin-related [Methylobacillus flagellatus KT]637938126 YP_545331</i>                                      |                      |                   |                 |                 |            |                                               |                      |                   |                 |                 |           |                        |   |                   |  |

| ORF             | AM/OH <i>M. Flagellatus</i> Spectral Count                                                                                         |                              |                           |                         |                        | AM/OH <i>M. Flagellatus</i> Protein Intensity |          |                              |                           |                         | Spectral Count         |           | Protein Intensity |  | Log <sub>2</sub> Ratio |
|-----------------|------------------------------------------------------------------------------------------------------------------------------------|------------------------------|---------------------------|-------------------------|------------------------|-----------------------------------------------|----------|------------------------------|---------------------------|-------------------------|------------------------|-----------|-------------------|--|------------------------|
|                 | q-value                                                                                                                            | log <sub>2</sub> Methylamine | log <sub>2</sub> Methanol | log <sub>2</sub> Sc Sum | log <sub>2</sub> Ratio | Regulation                                    | q-value  | log <sub>2</sub> Methylamine | log <sub>2</sub> Methanol | log <sub>2</sub> PI Sum | log <sub>2</sub> Ratio | Consensus |                   |  |                        |
| <b>MFLA1223</b> | 0                                                                                                                                  | 8.105                        | 9.576                     | 10.021                  | -1.452                 | G ● ● Y                                       | 1.03 E-2 | 27.460                       | 29.854                    | 30.105                  | -2.375                 | G ●       |                   |  |                        |
|                 | <i>Ribonucleoside-diphosphate reductase [Methylobacillus flagellatus KT]637938127 YP_545332</i>                                    |                              |                           |                         |                        |                                               |          |                              |                           |                         |                        |           |                   |  |                        |
| <b>MFLA1224</b> | 0                                                                                                                                  | 5.690                        | 7.178                     | 7.618                   | -1.455                 | G ● ● Y                                       | 1.29 E-2 | 25.241                       | 26.732                    | 27.171                  | -1.536                 | G ●       |                   |  |                        |
|                 | <i>Ribonucleoside-diphosphate reductase [Methylobacillus flagellatus KT]637938128 YP_545333</i>                                    |                              |                           |                         |                        |                                               |          |                              |                           |                         |                        |           |                   |  |                        |
| <b>MFLA1225</b> | 0.000                                                                                                                              | 0.000                        |                           |                         |                        | ● ●                                           |          | 0.000                        | 0.000                     |                         |                        | ●         |                   |  |                        |
|                 | <i>ferredoxin [Methylobacillus flagellatus KT]637938129 YP_545334</i>                                                              |                              |                           |                         |                        |                                               |          |                              |                           |                         |                        |           |                   |  |                        |
| <b>MFLA1226</b> |                                                                                                                                    |                              | 2.170                     | 2.170                   |                        | Y ● ● Y                                       |          |                              | 21.238                    | 21.238                  |                        | Y ●       |                   |  |                        |
|                 | <i>protein of unknown function UPF0118 [Methylobacillus flagellatus KT]637938130 YP_545335</i>                                     |                              |                           |                         |                        |                                               |          |                              |                           |                         |                        |           |                   |  |                        |
| <b>MFLA1227</b> | 4.093                                                                                                                              | 4.511                        | 5.317                     | 5.317                   | -0.439                 | Y ● ● Y                                       | 1.56 E-1 | 22.859                       | 23.496                    | 24.212                  | -0.998                 | Y ●       |                   |  |                        |
|                 | <i>hypothetical protein [Methylobacillus flagellatus KT]637938131 YP_545336</i>                                                    |                              |                           |                         |                        |                                               |          |                              |                           |                         |                        |           |                   |  |                        |
| <b>MFLA1228</b> | 0.000                                                                                                                              | 0.000                        |                           |                         |                        | ● ●                                           |          | 0.000                        | 0.000                     |                         |                        | ●         |                   |  |                        |
|                 | <i>hypothetical protein [Methylobacillus flagellatus KT]637938132 YP_545337</i>                                                    |                              |                           |                         |                        |                                               |          |                              |                           |                         |                        |           |                   |  |                        |
| <b>MFLA1229</b> | 9.4 E-3                                                                                                                            | 4.624                        | 5.413                     | 6.072                   | -0.793                 | G ● ● Y                                       | 7.05 E-2 | 21.316                       | 22.232                    | 22.846                  | -1.381                 | G ●       |                   |  |                        |
|                 | <i>"cobalamin synthesis protein, P47K [Methylobacillus flagellatus KT]637938133 YP_545338 ""</i>                                   |                              |                           |                         |                        |                                               |          |                              |                           |                         |                        |           |                   |  |                        |
| <b>MFLA1230</b> | 1.33 E-1                                                                                                                           | 5.510                        | 5.650                     | 6.581                   | -0.147                 | Y ● ● Y                                       | 1.06 E-1 | 24.651                       | 24.988                    | 25.829                  | -0.401                 | Y ●       |                   |  |                        |
|                 | <i>"cobalamin synthesis protein, P47K [Methylobacillus flagellatus KT]637938134 YP_545339 ""</i>                                   |                              |                           |                         |                        |                                               |          |                              |                           |                         |                        |           |                   |  |                        |
| <b>MFLA1231</b> | 0.000                                                                                                                              | 0.000                        |                           |                         |                        | ● ●                                           |          | 0.000                        | 0.000                     |                         |                        | ●         |                   |  |                        |
|                 | <i>"cobalamin synthesis protein, P47K [Methylobacillus flagellatus KT]637938135 YP_545340 ""</i>                                   |                              |                           |                         |                        |                                               |          |                              |                           |                         |                        |           |                   |  |                        |
| <b>MFLA1232</b> | 0.000                                                                                                                              | 0.000                        |                           |                         |                        | ● ●                                           |          | 0.000                        | 0.000                     |                         |                        | ●         |                   |  |                        |
|                 | <i>"transcriptional regulators, TraR/DksA family [Methylobacillus flagellatus KT]637938136 YP_545341 ""</i>                        |                              |                           |                         |                        |                                               |          |                              |                           |                         |                        |           |                   |  |                        |
| <b>MFLA1233</b> | 4.294                                                                                                                              | 4.044                        | 5.174                     | 5.174                   | 0.094                  | Y ● ● Y                                       | 2.17 E-1 | 23.246                       | 23.064                    | 24.158                  | 0.310                  | Y ●       |                   |  |                        |
|                 | <i>"ferric uptake regulator, FUR family [Methylobacillus flagellatus KT]637938137 YP_545342 ""</i>                                 |                              |                           |                         |                        |                                               |          |                              |                           |                         |                        |           |                   |  |                        |
| <b>MFLA1234</b> | 4.49 E-4                                                                                                                           | 4.959                        | 5.854                     | 6.475                   | -0.909                 | G ● ● Y                                       | 4.4 E-2  | 23.167                       | 24.459                    | 24.953                  | -1.566                 | G ●       |                   |  |                        |
|                 | <i>ribonuclease II [Methylobacillus flagellatus KT]637938138 YP_545343</i>                                                         |                              |                           |                         |                        |                                               |          |                              |                           |                         |                        |           |                   |  |                        |
| <b>MFLA1235</b> | 2.761                                                                                                                              |                              | 2.761                     |                         |                        | Y ● ● Y                                       |          | 20.972                       |                           | 20.972                  |                        | Y ●       |                   |  |                        |
|                 | <i>hypothetical protein [Methylobacillus flagellatus KT]637938139 YP_545344</i>                                                    |                              |                           |                         |                        |                                               |          |                              |                           |                         |                        |           |                   |  |                        |
| <b>MFLA1236</b> | 3.899                                                                                                                              | 4.087                        | 4.996                     | 4.996                   | -0.167                 | Y ● ● G                                       | 9.78 E-3 | 22.839                       | 23.510                    | 24.213                  | -0.678                 | G ●       |                   |  |                        |
|                 | <i>putative RNA methylase [Methylobacillus flagellatus KT]637938140 YP_545345</i>                                                  |                              |                           |                         |                        |                                               |          |                              |                           |                         |                        |           |                   |  |                        |
| <b>MFLA1237</b> | 2.521                                                                                                                              |                              | 2.521                     |                         |                        | Y ● ● Y                                       |          | 20.305                       |                           | 20.305                  |                        | Y ●       |                   |  |                        |
|                 | <i>hypothetical protein [Methylobacillus flagellatus KT]637938141 YP_545346</i>                                                    |                              |                           |                         |                        |                                               |          |                              |                           |                         |                        |           |                   |  |                        |
| <b>MFLA1238</b> | 6.28 E-11                                                                                                                          | 6.762                        | 7.616                     | 8.251                   | -0.850                 | G ● ● G                                       | 6.36 E-3 | 26.218                       | 27.171                    | 27.772                  | -0.951                 | G ●       |                   |  |                        |
|                 | <i>"Peptidase M1, alanyl aminopeptidase [Methylobacillus flagellatus KT]637938142 YP_545347 ""</i>                                 |                              |                           |                         |                        |                                               |          |                              |                           |                         |                        |           |                   |  |                        |
| <b>MFLA1239</b> | 0.000                                                                                                                              | 0.000                        |                           |                         |                        | ● ●                                           |          | 0.000                        | 0.000                     |                         |                        | ●         |                   |  |                        |
|                 | <i>Phytanoyl-CoA dioxygenase [Methylobacillus flagellatus KT]637938143 YP_545348</i>                                               |                              |                           |                         |                        |                                               |          |                              |                           |                         |                        |           |                   |  |                        |
| <b>MFLA1240</b> | 9.334                                                                                                                              | 9.745                        | 10.554                    | 10.554                  | -0.958                 | Y ● ● Y                                       | 5.71 E-2 | 29.376                       | 29.943                    | 30.687                  | -0.649                 | Y ●       |                   |  |                        |
|                 | <i>alkyl hydroperoxide reductase/ Thiol specific antioxidant/ Mal allergen [Methylobacillus flagellatus KT]637938144 YP_545349</i> |                              |                           |                         |                        |                                               |          |                              |                           |                         |                        |           |                   |  |                        |
| <b>MFLA1241</b> | 4.647                                                                                                                              | 3.880                        | 5.314                     | 5.314                   | 0.798                  | Y ● ● Y                                       | 2.7 E-2  | 24.405                       | 23.284                    | 24.951                  | 1.208                  | Y ●       |                   |  |                        |
|                 | <i>hypothetical protein [Methylobacillus flagellatus KT]637938145 YP_545350</i>                                                    |                              |                           |                         |                        |                                               |          |                              |                           |                         |                        |           |                   |  |                        |
| <b>MFLA1242</b> | 3.081                                                                                                                              | 2.710                        | 3.907                     | 3.907                   | -0.006                 | Y ● ● Y                                       | 3.86 E-2 | 23.773                       | 22.473                    | 24.265                  | 1.370                  | Y ●       |                   |  |                        |
|                 | <i>response regulator receiver domain protein (CheY-like) [Methylobacillus flagellatus KT]637938146 YP_545351</i>                  |                              |                           |                         |                        |                                               |          |                              |                           |                         |                        |           |                   |  |                        |
| <b>MFLA1243</b> | 4.915                                                                                                                              | 4.520                        | 5.731                     | 5.731                   | 0.109                  | Y ● ● Y                                       | 6.73 E-2 | 24.573                       | 26.172                    | 26.583                  | -1.731                 | Y ●       |                   |  |                        |
|                 | <i>response regulator receiver domain protein (CheY-like) [Methylobacillus flagellatus KT]637938147 YP_545352</i>                  |                              |                           |                         |                        |                                               |          |                              |                           |                         |                        |           |                   |  |                        |
| <b>MFLA1244</b> | 3.996                                                                                                                              | 3.700                        | 4.856                     | 4.856                   | 0.294                  | Y ● ● R                                       | 4.7 E-4  | 23.058                       | 21.937                    | 23.604                  | 1.120                  | R ●       |                   |  |                        |
|                 | <i>CheW protein [Methylobacillus flagellatus KT]637938148 YP_545353</i>                                                            |                              |                           |                         |                        |                                               |          |                              |                           |                         |                        |           |                   |  |                        |

| ORF             | AM/OH <i>M. Flagellatus</i> Spectral Count                                                                                             |                              |                           |                         |                        | AM/OH <i>M. Flagellatus</i> Protein Intensity |          |                              |                           |                         | Spectral Count         |           | Protein Intensity |  | Log <sub>2</sub> Ratio |
|-----------------|----------------------------------------------------------------------------------------------------------------------------------------|------------------------------|---------------------------|-------------------------|------------------------|-----------------------------------------------|----------|------------------------------|---------------------------|-------------------------|------------------------|-----------|-------------------|--|------------------------|
|                 | q-value                                                                                                                                | log <sub>2</sub> Methylamine | log <sub>2</sub> Methanol | log <sub>2</sub> Sc Sum | log <sub>2</sub> Ratio | Regulation                                    | q-value  | log <sub>2</sub> Methylamine | log <sub>2</sub> Methanol | log <sub>2</sub> PI Sum | log <sub>2</sub> Ratio | Consensus |                   |  |                        |
| <b>MFLA1245</b> |                                                                                                                                        | 6.559                        | 6.873                     | 7.724                   | -0.298                 | Y ●●● Y                                       | 1.71 E-1 | 25.500                       | 25.707                    | 26.607                  | -0.293                 | Y ●●      |                   |  |                        |
|                 | <i>methyl-accepting chemotaxis sensory transducer [Methylobacillus flagellatus KT]637938149 YP_545354</i>                              |                              |                           |                         |                        |                                               |          |                              |                           |                         |                        |           |                   |  |                        |
| <b>MFLA1246</b> | 3.97 E-6                                                                                                                               | 7.173                        | 6.486                     | 7.870                   | 0.702                  | R ●●● Y                                       | 4.29 E-2 | 25.523                       | 25.155                    | 26.351                  | 0.371                  | R ●●      |                   |  |                        |
|                 | <i>CheA signal transduction histidine kinases [Methylobacillus flagellatus KT]637938150 YP_545355</i>                                  |                              |                           |                         |                        |                                               |          |                              |                           |                         |                        |           |                   |  |                        |
| <b>MFLA1247</b> |                                                                                                                                        | 5.329                        | 6.045                     | 6.731                   | -0.687                 | Y ●●● Y                                       | 1.1 E-1  | 23.255                       | 24.114                    | 24.748                  | -1.222                 | Y ●●      |                   |  |                        |
|                 | <i>" DNA polymerase III, alpha subunit [Methylobacillus flagellatus KT]637938151 YP_545356 ""</i>                                      |                              |                           |                         |                        |                                               |          |                              |                           |                         |                        |           |                   |  |                        |
| <b>MFLA1248</b> | 4.31 E-2                                                                                                                               | 6.287                        | 6.635                     | 7.472                   | -0.345                 | Y ●●● Y                                       | 2.7 E-2  | 26.196                       | 26.995                    | 27.650                  | -0.833                 | Y ●●      |                   |  |                        |
|                 | <i>" acetyl-CoA carboxylase, carboxyl transferase, alpha subunit [Methylobacillus flagellatus KT]637938152 YP_545357 ""</i>            |                              |                           |                         |                        |                                               |          |                              |                           |                         |                        |           |                   |  |                        |
| <b>MFLA1249</b> |                                                                                                                                        | 1.843                        | 3.523                     | 3.914                   | -0.645                 | Y ●●● Y                                       | 1.17 E-1 | 19.336                       | 22.437                    | 22.596                  | -1.880                 | Y ●●      |                   |  |                        |
|                 | <i>tRNA(Ile)-lysine synthetase-like protein [Methylobacillus flagellatus KT]637938153 YP_545358</i>                                    |                              |                           |                         |                        |                                               |          |                              |                           |                         |                        |           |                   |  |                        |
| <b>MFLA1250</b> |                                                                                                                                        | 4.353                        | 3.476                     | 4.980                   | 0.459                  | Y ●●● Y                                       | 1.14 E-1 | 23.166                       | 22.399                    | 23.833                  | 0.756                  | Y ●●      |                   |  |                        |
|                 | <i>Arylesterase [Methylobacillus flagellatus KT]637938154 YP_545359</i>                                                                |                              |                           |                         |                        |                                               |          |                              |                           |                         |                        |           |                   |  |                        |
| <b>MFLA1251</b> |                                                                                                                                        | 3.461                        | 4.551                     | 5.107                   | -0.741                 | Y ●●● Y                                       | 2.21 E-1 | 22.026                       | 22.218                    | 23.125                  | -0.133                 | Y ●●      |                   |  |                        |
|                 | <i>ABC transporter related [Methylobacillus flagellatus KT]637938155 YP_545360</i>                                                     |                              |                           |                         |                        |                                               |          |                              |                           |                         |                        |           |                   |  |                        |
| <b>MFLA1252</b> |                                                                                                                                        | 4.146                        | 1.184                     | 4.320                   | 2.482                  | Y ●●● Y                                       | 6.47 E-2 | 22.705                       | 21.283                    | 23.162                  | 1.553                  | Y ●●      |                   |  |                        |
|                 | <i>protein of unknown function DUF214 [Methylobacillus flagellatus KT]637938156 YP_545361</i>                                          |                              |                           |                         |                        |                                               |          |                              |                           |                         |                        |           |                   |  |                        |
| <b>MFLA1253</b> | 0                                                                                                                                      | 6.891                        | 3.301                     | 7.006                   | 3.644                  | R ●●● Y                                       | 1.38 E-2 | 26.020                       | 22.288                    | 26.125                  | 3.751                  | R ●●      |                   |  |                        |
|                 | <i>TonB-dependent receptor [Methylobacillus flagellatus KT]637938157 YP_545362</i>                                                     |                              |                           |                         |                        |                                               |          |                              |                           |                         |                        |           |                   |  |                        |
| <b>MFLA1254</b> |                                                                                                                                        | 5.492                        | 3.584                     | 5.833                   | 1.907                  | Y ●●● Y                                       | 1.1 E-2  | 24.197                       | 22.325                    | 24.545                  | 1.854                  | Y ●●      |                   |  |                        |
|                 | <i>" two component, sigma54 specific, transcriptional regulator, Fis family [Methylobacillus flagellatus KT]637938158 YP_545363 ""</i> |                              |                           |                         |                        |                                               |          |                              |                           |                         |                        |           |                   |  |                        |
| <b>MFLA1255</b> | 1.06 E-1                                                                                                                               | 5.581                        | 5.838                     | 6.715                   | -0.261                 | Y ●●● Y                                       | 2.58 E-1 | 25.686                       | 25.643                    | 26.665                  | -0.014                 | Y ●●      |                   |  |                        |
|                 | <i>phosphoribosylglycinamide formyltransferase 2 [Methylobacillus flagellatus KT]637938159 YP_545364</i>                               |                              |                           |                         |                        |                                               |          |                              |                           |                         |                        |           |                   |  |                        |
| <b>MFLA1256</b> |                                                                                                                                        | 1.674                        | 1.322                     | 2.509                   | -0.655                 | Y ●●● Y                                       | 2.18 E-1 | 21.055                       | 20.250                    | 21.708                  | -0.318                 | Y ●●      |                   |  |                        |
|                 | <i>globin [Methylobacillus flagellatus KT]637938160 YP_545365</i>                                                                      |                              |                           |                         |                        |                                               |          |                              |                           |                         |                        |           |                   |  |                        |
| <b>MFLA1257</b> |                                                                                                                                        | 5.113                        | 5.726                     | 6.452                   | -0.744                 | Y ●●● Y                                       | 1.12 E-1 | 24.388                       | 25.071                    | 25.769                  | -1.264                 | Y ●●      |                   |  |                        |
|                 | <i>DEAD/DEAH box helicase-like protein [Methylobacillus flagellatus KT]637938161 YP_545366</i>                                         |                              |                           |                         |                        |                                               |          |                              |                           |                         |                        |           |                   |  |                        |
| <b>MFLA1258</b> |                                                                                                                                        | 4.642                        | 3.353                     | 5.137                   | 1.146                  | Y ●●● Y                                       | 2.13 E-1 | 23.353                       | 22.960                    | 24.170                  | -0.633                 | Y ●●      |                   |  |                        |
|                 | <i>DEAD/DEAH box helicase-like protein [Methylobacillus flagellatus KT]637938162 YP_545367</i>                                         |                              |                           |                         |                        |                                               |          |                              |                           |                         |                        |           |                   |  |                        |
| <b>MFLA1259</b> | 6.96 E-5                                                                                                                               | 7.762                        | 7.318                     | 8.557                   | 0.427                  | Y ●●● Y                                       | 4.29 E-2 | 25.838                       | 26.855                    | 27.434                  | -1.123                 | Y ●●      |                   |  |                        |
|                 | <i>GTP-binding protein TypA [Methylobacillus flagellatus KT]637938163 YP_545368</i>                                                    |                              |                           |                         |                        |                                               |          |                              |                           |                         |                        |           |                   |  |                        |
| <b>MFLA1260</b> |                                                                                                                                        | 0.000                        | 0.000                     |                         |                        | ●●                                            |          | 0.000                        | 0.000                     |                         |                        | ●●        |                   |  |                        |
|                 | <i>TPR repeat [Methylobacillus flagellatus KT]637938164 YP_545369</i>                                                                  |                              |                           |                         |                        |                                               |          |                              |                           |                         |                        |           |                   |  |                        |
| <b>MFLA1261</b> | 3.52 E-2                                                                                                                               | 4.891                        | 5.463                     | 6.205                   | -0.581                 | Y ●●● Y                                       | 1.18 E-2 | 22.234                       | 23.900                    | 24.295                  | -1.679                 | Y ●●      |                   |  |                        |
|                 | <i>protein of unknown function DUF195 [Methylobacillus flagellatus KT]637938165 YP_545370</i>                                          |                              |                           |                         |                        |                                               |          |                              |                           |                         |                        |           |                   |  |                        |
| <b>MFLA1262</b> |                                                                                                                                        | 3.591                        | 2.459                     | 4.133                   | 0.111                  | Y ●●● Y                                       | 1.1 E-1  | 20.977                       | 20.542                    | 21.776                  | -0.625                 | Y ●●      |                   |  |                        |
|                 | <i>" molybdopterin converting factor, subunit 1 [Methylobacillus flagellatus KT]637938166 YP_545371 ""</i>                             |                              |                           |                         |                        |                                               |          |                              |                           |                         |                        |           |                   |  |                        |
| <b>MFLA1263</b> |                                                                                                                                        | 0.521                        | 3.162                     | 3.376                   | -1.641                 | Y ●●● Y                                       | 9 E-2    | 17.504                       | 22.712                    | 22.750                  | -4.092                 | Y ●●      |                   |  |                        |
|                 | <i>molybdopterin biosynthesis MoaE [Methylobacillus flagellatus KT]637938167 YP_545372</i>                                             |                              |                           |                         |                        |                                               |          |                              |                           |                         |                        |           |                   |  |                        |
| <b>MFLA1264</b> |                                                                                                                                        | 4.566                        | 4.781                     | 5.677                   | -0.299                 | Y ●●● Y                                       | 1.17 E-1 | 23.069                       | 23.479                    | 24.288                  | -0.549                 | Y ●●      |                   |  |                        |
|                 | <i>ATP-dependent protease-like protein [Methylobacillus flagellatus KT]637938168 YP_545373</i>                                         |                              |                           |                         |                        |                                               |          |                              |                           |                         |                        |           |                   |  |                        |
| <b>MFLA1265</b> |                                                                                                                                        | 0.000                        | 0.000                     |                         |                        | ●●                                            |          | 0.000                        | 0.000                     |                         |                        | ●●        |                   |  |                        |
|                 | <i>RNA-binding S4 [Methylobacillus flagellatus KT]637938169 YP_545374</i>                                                              |                              |                           |                         |                        |                                               |          |                              |                           |                         |                        |           |                   |  |                        |
| <b>MFLA1266</b> |                                                                                                                                        | 0.000                        | 0.000                     |                         |                        | ●●                                            |          | 0.000                        | 0.000                     |                         |                        | ●●        |                   |  |                        |
|                 | <i>Radical SAM [Methylobacillus flagellatus KT]637938170 YP_545375</i>                                                                 |                              |                           |                         |                        |                                               |          |                              |                           |                         |                        |           |                   |  |                        |

| ORF             | AM/OH <i>M. Flagellatus</i> Spectral Count                                                                                       |                              |                           |                         |                        | AM/OH <i>M. Flagellatus</i> Protein Intensity |          |                              |                           |                         | Spectral Count         |           | Protein Intensity |  | Log <sub>2</sub> Ratio |
|-----------------|----------------------------------------------------------------------------------------------------------------------------------|------------------------------|---------------------------|-------------------------|------------------------|-----------------------------------------------|----------|------------------------------|---------------------------|-------------------------|------------------------|-----------|-------------------|--|------------------------|
|                 | q-value                                                                                                                          | log <sub>2</sub> Methylamine | log <sub>2</sub> Methanol | log <sub>2</sub> Sc Sum | log <sub>2</sub> Ratio | Regulation                                    | q-value  | log <sub>2</sub> Methylamine | log <sub>2</sub> Methanol | log <sub>2</sub> PI Sum | log <sub>2</sub> Ratio | Consensus |                   |  |                        |
| <b>MFLA1267</b> |                                                                                                                                  | 2.843                        | 3.725                     | 4.350                   | 0.131                  | Y ●●                                          | 5.93 E-2 | 20.726                       | 23.889                    | 24.042                  | -2.145                 | Y ●       |                   |  |                        |
|                 | <i>short-chain dehydrogenase/reductase SDR [Methylobacillus flagellatus KT]637938171 YP_545376</i>                               |                              |                           |                         |                        |                                               |          |                              |                           |                         |                        |           |                   |  |                        |
| <b>MFLA1268</b> |                                                                                                                                  | 5.237                        | 4.465                     | 5.902                   | 0.342                  | Y ●●                                          | 1.54 E-1 | 23.608                       | 24.072                    | 24.859                  | -0.964                 | Y ●       |                   |  |                        |
|                 | <i>Mannose-1-phosphate guanylyltransferase/mannose-6-phosphate isomerase [Methylobacillus flagellatus KT]637938172 YP_545377</i> |                              |                           |                         |                        |                                               |          |                              |                           |                         |                        |           |                   |  |                        |
| <b>MFLA1269</b> |                                                                                                                                  | 0.000                        | 0.000                     |                         |                        | ■                                             |          | 0.000                        | 0.000                     |                         |                        | ■         |                   |  |                        |
|                 | <i>ABC-2 [Methylobacillus flagellatus KT]637938173 YP_545378</i>                                                                 |                              |                           |                         |                        |                                               |          |                              |                           |                         |                        |           |                   |  |                        |
| <b>MFLA1270</b> |                                                                                                                                  | 0.000                        | 0.000                     |                         |                        | ■                                             |          | 0.000                        | 0.000                     |                         |                        | ■         |                   |  |                        |
|                 | <i>NDP-hexose 3-C-methyltransferase TyICIII [Methylobacillus flagellatus KT]637938174 YP_545379</i>                              |                              |                           |                         |                        |                                               |          |                              |                           |                         |                        |           |                   |  |                        |
| <b>MFLA1271</b> |                                                                                                                                  | 4.42 E-5                     | 5.949                     | 6.605                   | 7.314                  | G ●●                                          | 2.73 E-2 | 25.738                       | 26.614                    | 27.241                  | -0.967                 | G ●       |                   |  |                        |
|                 | <i>" GDP-mannose 4,6-dehydratase [Methylobacillus flagellatus KT]637938175 YP_545380 ""</i>                                      |                              |                           |                         |                        |                                               |          |                              |                           |                         |                        |           |                   |  |                        |
| <b>MFLA1272</b> |                                                                                                                                  | 3.328                        | 4.147                     | 4.795                   | 0.333                  | Y ●●                                          | 9.42 E-2 | 21.738                       | 23.236                    | 23.674                  | -0.486                 | Y ●       |                   |  |                        |
|                 | <i>NAD-dependent epimerase/dehydratase [Methylobacillus flagellatus KT]637938176 YP_545381</i>                                   |                              |                           |                         |                        |                                               |          |                              |                           |                         |                        |           |                   |  |                        |
| <b>MFLA1273</b> |                                                                                                                                  | 5.74 E-2                     | 4.967                     | 5.305                   | 6.146                  | Y ●●                                          | 2.41 E-1 | 24.098                       | 23.980                    | 25.040                  | -0.096                 | Y ●       |                   |  |                        |
|                 | <i>" glycosyl transferase, group 1 [Methylobacillus flagellatus KT]637938177 YP_545382 ""</i>                                    |                              |                           |                         |                        |                                               |          |                              |                           |                         |                        |           |                   |  |                        |
| <b>MFLA1274</b> |                                                                                                                                  | 0.000                        | 0.000                     |                         |                        | ■                                             |          | 0.000                        | 0.000                     |                         |                        | ■         |                   |  |                        |
|                 | <i>polysaccharide export protein [Methylobacillus flagellatus KT]637938178 YP_545383</i>                                         |                              |                           |                         |                        |                                               |          |                              |                           |                         |                        |           |                   |  |                        |
| <b>MFLA1275</b> |                                                                                                                                  |                              | 2.000                     | 2.000                   |                        | Y ●●                                          |          |                              | 20.008                    | 20.008                  |                        | Y ●       |                   |  |                        |
|                 | <i>" glycosyl transferase, group 1 [Methylobacillus flagellatus KT]637938179 YP_545384 ""</i>                                    |                              |                           |                         |                        |                                               |          |                              |                           |                         |                        |           |                   |  |                        |
| <b>MFLA1276</b> |                                                                                                                                  | 1.521                        |                           | 1.521                   |                        | Y ●●                                          |          | 19.110                       |                           | 19.110                  |                        | Y ●       |                   |  |                        |
|                 | <i>NAD-dependent epimerase/dehydratase [Methylobacillus flagellatus KT]637938180 YP_545385</i>                                   |                              |                           |                         |                        |                                               |          |                              |                           |                         |                        |           |                   |  |                        |
| <b>MFLA1277</b> |                                                                                                                                  | 1.106                        |                           | 1.106                   |                        | Y ●●                                          |          | 19.962                       |                           | 19.962                  |                        | Y ●       |                   |  |                        |
|                 | <i>sugar transferase [Methylobacillus flagellatus KT]637938181 YP_545386</i>                                                     |                              |                           |                         |                        |                                               |          |                              |                           |                         |                        |           |                   |  |                        |
| <b>MFLA1278</b> |                                                                                                                                  | 1.106                        | 3.140                     | 3.455                   | -1.021                 | Y ●●                                          | 1.41 E-1 | 20.240                       | 22.242                    | 22.563                  | -0.821                 | Y ●       |                   |  |                        |
|                 | <i>polysaccharide biosynthesis protein CapD [Methylobacillus flagellatus KT]637938182 YP_545387</i>                              |                              |                           |                         |                        |                                               |          |                              |                           |                         |                        |           |                   |  |                        |
| <b>MFLA1279</b> |                                                                                                                                  | 8.81 E-17                    | 6.975                     | 7.918                   | 8.523                  | G ●●                                          | 2.25 E-1 | 27.103                       | 27.193                    | 28.149                  | -0.146                 | G ●       |                   |  |                        |
|                 | <i>UTP-glucose-1-phosphate uridylyltransferase [Methylobacillus flagellatus KT]637938183 YP_545388</i>                           |                              |                           |                         |                        |                                               |          |                              |                           |                         |                        |           |                   |  |                        |
| <b>MFLA1280</b> |                                                                                                                                  | 0.000                        | 0.000                     |                         |                        | ■                                             |          | 0.000                        | 0.000                     |                         |                        | ■         |                   |  |                        |
|                 | <i>phosphoribosyltransferase [Methylobacillus flagellatus KT]637938184 YP_545389</i>                                             |                              |                           |                         |                        |                                               |          |                              |                           |                         |                        |           |                   |  |                        |
| <b>MFLA1281</b> |                                                                                                                                  | 4.402                        | 5.379                     | 5.972                   | -0.981                 | Y ●●                                          | 1.01 E-2 | 23.339                       | 24.602                    | 25.104                  | -1.284                 | Y ●       |                   |  |                        |
|                 | <i>response regulator receiver domain protein (CheY-like) [Methylobacillus flagellatus KT]637938185 YP_545390</i>                |                              |                           |                         |                        |                                               |          |                              |                           |                         |                        |           |                   |  |                        |
| <b>MFLA1282</b> |                                                                                                                                  | 0.000                        | 0.000                     |                         |                        | ■                                             |          | 0.000                        | 0.000                     |                         |                        | ■         |                   |  |                        |
|                 | <i>response regulator receiver domain protein (CheY-like) [Methylobacillus flagellatus KT]637938186 YP_545391</i>                |                              |                           |                         |                        |                                               |          |                              |                           |                         |                        |           |                   |  |                        |
| <b>MFLA1283</b> |                                                                                                                                  | 4.140                        | 3.975                     | 5.060                   | 0.152                  | Y ●●                                          | 2.21 E-1 | 21.824                       | 21.612                    | 22.722                  | 0.132                  | Y ●       |                   |  |                        |
|                 | <i>PAS/PAC sensor signal transduction histidine kinase [Methylobacillus flagellatus KT]637938187 YP_545392</i>                   |                              |                           |                         |                        |                                               |          |                              |                           |                         |                        |           |                   |  |                        |
| <b>MFLA1284</b> |                                                                                                                                  | 0.000                        | 0.000                     |                         |                        | ■                                             |          | 0.000                        | 0.000                     |                         |                        | ■         |                   |  |                        |
|                 | <i>hypothetical protein [Methylobacillus flagellatus KT]637938188 YP_545393</i>                                                  |                              |                           |                         |                        |                                               |          |                              |                           |                         |                        |           |                   |  |                        |
| <b>MFLA1285</b> |                                                                                                                                  | 6.893                        | 6.466                     | 7.695                   | 0.473                  | Y ●●                                          | 6.85 E-2 | 26.342                       | 25.778                    | 27.087                  | 0.573                  | Y ●       |                   |  |                        |
|                 | <i>hypothetical protein [Methylobacillus flagellatus KT]637938189 YP_545394</i>                                                  |                              |                           |                         |                        |                                               |          |                              |                           |                         |                        |           |                   |  |                        |
| <b>MFLA1286</b> |                                                                                                                                  | 0                            | 8.905                     | 9.477                   | 10.219                 | G ●●                                          | 2.79 E-2 | 28.833                       | 29.746                    | 30.361                  | -0.999                 | G ●       |                   |  |                        |
|                 | <i>Glutamate dehydrogenase (NADP+) [Methylobacillus flagellatus KT]637938190 YP_545395</i>                                       |                              |                           |                         |                        |                                               |          |                              |                           |                         |                        |           |                   |  |                        |
| <b>MFLA1287</b> |                                                                                                                                  | 0.000                        | 0.000                     |                         |                        | ■                                             |          | 0.000                        | 0.000                     |                         |                        | ■         |                   |  |                        |
|                 | <i>aminoglycoside phosphotransferase [Methylobacillus flagellatus KT]637938191 YP_545396</i>                                     |                              |                           |                         |                        |                                               |          |                              |                           |                         |                        |           |                   |  |                        |
| <b>MFLA1288</b> |                                                                                                                                  | 0.000                        | 0.000                     |                         |                        | ■                                             |          | 0.000                        | 0.000                     |                         |                        | ■         |                   |  |                        |
|                 | <i>ribosomal protein L36 [Methylobacillus flagellatus KT]637938192 YP_545397</i>                                                 |                              |                           |                         |                        |                                               |          |                              |                           |                         |                        |           |                   |  |                        |

| ORF             | AM/OH <i>M. Flagellatus</i> Spectral Count                                                                                   |                      |                   |                 |                 |            | AM/OH <i>M. Flagellatus</i> Protein Intensity |                      |                   |                 |                 |           | Spectral Count         |  | Protein Intensity |  |
|-----------------|------------------------------------------------------------------------------------------------------------------------------|----------------------|-------------------|-----------------|-----------------|------------|-----------------------------------------------|----------------------|-------------------|-----------------|-----------------|-----------|------------------------|--|-------------------|--|
|                 | $q$ -value                                                                                                                   | $\log_2$ Methylamine | $\log_2$ Methanol | $\log_2$ Sc Sum | $\log_2$ -Ratio | Regulation | $q$ -value                                    | $\log_2$ Methylamine | $\log_2$ Methanol | $\log_2$ PI Sum | $\log_2$ -Ratio | Consensus | Log <sub>2</sub> Ratio |  |                   |  |
| <b>MFLA1289</b> |                                                                                                                              | 0.000                | 0.000             |                 |                 |            |                                               | 0.000                | 0.000             |                 |                 |           |                        |  |                   |  |
|                 | <i>major facilitator superfamily MFS_1 [Methylobacillus flagellatus KT]637938193 YP_545398</i>                               |                      |                   |                 |                 |            |                                               |                      |                   |                 |                 |           |                        |  |                   |  |
| <b>MFLA1290</b> |                                                                                                                              | 0.000                | 0.000             |                 |                 |            |                                               | 0.000                | 0.000             |                 |                 |           |                        |  |                   |  |
|                 | <i>hypothetical protein [Methylobacillus flagellatus KT]637938194 YP_545399</i>                                              |                      |                   |                 |                 |            |                                               |                      |                   |                 |                 |           |                        |  |                   |  |
| <b>MFLA1291</b> |                                                                                                                              | 0.000                | 0.000             |                 |                 |            |                                               | 0.000                | 0.000             |                 |                 |           |                        |  |                   |  |
|                 | <i>protoheme IX farnesyltransferase [Methylobacillus flagellatus KT]637938195 YP_545400</i>                                  |                      |                   |                 |                 |            |                                               |                      |                   |                 |                 |           |                        |  |                   |  |
| <b>MFLA1292</b> |                                                                                                                              | 0.000                | 0.000             |                 |                 |            |                                               | 0.000                | 0.000             |                 |                 |           |                        |  |                   |  |
|                 | <i>cytochrome C oxidase subunit IV [Methylobacillus flagellatus KT]637938196 YP_545401</i>                                   |                      |                   |                 |                 |            |                                               |                      |                   |                 |                 |           |                        |  |                   |  |
| <b>MFLA1293</b> |                                                                                                                              | 0.000                | 0.000             |                 |                 |            |                                               | 0.000                | 0.000             |                 |                 |           |                        |  |                   |  |
|                 | <i>" cytochrome c oxidase, subunit III [Methylobacillus flagellatus KT]637938197 YP_545402 ""</i>                            |                      |                   |                 |                 |            |                                               |                      |                   |                 |                 |           |                        |  |                   |  |
| <b>MFLA1294</b> | 6.88 E-2                                                                                                                     | 5.826                | 6.105             | 6.972           | -0.299          | Y ●●       | Y                                             | 1.34 E-1             | 26.645            | 26.796          | 27.723          | -0.143    | Y ●                    |  |                   |  |
|                 | <i>Cytochrome-c oxidase [Methylobacillus flagellatus KT]637938198 YP_545403</i>                                              |                      |                   |                 |                 |            |                                               |                      |                   |                 |                 |           |                        |  |                   |  |
| <b>MFLA1295</b> | 7.837                                                                                                                        | 8.057                | 8.951             | -0.226          | Y ●●            | Y          | 3.12 E-2                                      | 28.014               | 28.539            | 29.300          | -0.521          | Y ●       |                        |  |                   |  |
|                 | <i>" ubiquinol oxidase, subunit II [Methylobacillus flagellatus KT]637938199 YP_545404 ""</i>                                |                      |                   |                 |                 |            |                                               |                      |                   |                 |                 |           |                        |  |                   |  |
| <b>MFLA1296</b> | 1.75 E-3                                                                                                                     | 5.427                | 4.734             | 6.122           | 0.646           | R ●●       | Y                                             | 7.03 E-2             | 24.859            | 23.848          | 25.440          | 1.165     | R ●                    |  |                   |  |
|                 | <i>" proteinase inhibitor I11, ecotin [Methylobacillus flagellatus KT]637938200 YP_545405 ""</i>                             |                      |                   |                 |                 |            |                                               |                      |                   |                 |                 |           |                        |  |                   |  |
| <b>MFLA1297</b> | 7.531                                                                                                                        | 7.251                | 8.398             | -0.105          | Y ●●            | Y          | 3.51 E-2                                      | 25.750               | 26.972            | 27.486          | -1.188          | Y ●       |                        |  |                   |  |
|                 | <i>hypothetical protein [Methylobacillus flagellatus KT]637938201 YP_545406</i>                                              |                      |                   |                 |                 |            |                                               |                      |                   |                 |                 |           |                        |  |                   |  |
| <b>MFLA1298</b> | 1.521                                                                                                                        | 3.295                | 3.665             | -0.738          | Y ●●            | Y          | 1.16 E-1                                      | 19.937               | 21.439            | 21.875          | -0.475          | Y ●       |                        |  |                   |  |
|                 | <i>" (p)ppGpp synthetase I (GTP pyrophosphokinase), SpoT/RelA [Methylobacillus flagellatus KT]637938202 YP_545407 ""</i>     |                      |                   |                 |                 |            |                                               |                      |                   |                 |                 |           |                        |  |                   |  |
| <b>MFLA1299</b> | 0.000                                                                                                                        | 0.000                |                   |                 |                 |            |                                               | 0.000                | 0.000             |                 |                 |           |                        |  |                   |  |
|                 | <i>DNA-3-methyladenine glycosylase II [Methylobacillus flagellatus KT]637938203 YP_545408</i>                                |                      |                   |                 |                 |            |                                               |                      |                   |                 |                 |           |                        |  |                   |  |
| <b>MFLA1300</b> | 0.000                                                                                                                        | 0.000                |                   |                 |                 |            |                                               | 0.000                | 0.000             |                 |                 |           |                        |  |                   |  |
|                 | <i>hypothetical protein [Methylobacillus flagellatus KT]637938204 YP_545409</i>                                              |                      |                   |                 |                 |            |                                               |                      |                   |                 |                 |           |                        |  |                   |  |
| <b>MFLA1301</b> | 0.000                                                                                                                        | 0.000                |                   |                 |                 |            |                                               | 0.000                | 0.000             |                 |                 |           |                        |  |                   |  |
|                 | <i>2OG-Fe(II) oxygenase [Methylobacillus flagellatus KT]637938205 YP_545410</i>                                              |                      |                   |                 |                 |            |                                               |                      |                   |                 |                 |           |                        |  |                   |  |
| <b>MFLA1302</b> | 5.244                                                                                                                        | 4.194                | 5.812             | 1.040           | Y ●●            | Y          | 2.33 E-1                                      | 23.137               | 23.237            | 24.188          | -0.211          | Y ●       |                        |  |                   |  |
|                 | <i>glutamine amidotransferase class-I [Methylobacillus flagellatus KT]637938206 YP_545411</i>                                |                      |                   |                 |                 |            |                                               |                      |                   |                 |                 |           |                        |  |                   |  |
| <b>MFLA1303</b> | 0.000                                                                                                                        | 0.000                |                   |                 |                 |            |                                               | 0.000                | 0.000             |                 |                 |           |                        |  |                   |  |
|                 | <i>putative GNAT-family acetyltransferase [Methylobacillus flagellatus KT]637938207 YP_545412</i>                            |                      |                   |                 |                 |            |                                               |                      |                   |                 |                 |           |                        |  |                   |  |
| <b>MFLA1304</b> | 2.328                                                                                                                        | 2.991                | 3.697             | 0.347           | Y ●●            | Y          | 9.02 E-2                                      | 19.278               | 21.109            | 21.467          | -0.808          | Y ●       |                        |  |                   |  |
|                 | <i>outer membrane efflux protein [Methylobacillus flagellatus KT]637938208 YP_545413</i>                                     |                      |                   |                 |                 |            |                                               |                      |                   |                 |                 |           |                        |  |                   |  |
| <b>MFLA1305</b> | 3.159                                                                                                                        | 4.571                | 5.031             | -1.673          | Y ●●            | Y          | 5.91 E-2                                      | 21.950               | 23.514            | 23.934          | -1.855          | Y ●       |                        |  |                   |  |
|                 | <i>Secretion protein HlyD [Methylobacillus flagellatus KT]637938209 YP_545414</i>                                            |                      |                   |                 |                 |            |                                               |                      |                   |                 |                 |           |                        |  |                   |  |
| <b>MFLA1306</b> | 5.754                                                                                                                        | 4.747                | 6.337             | 1.155           | Y ●●            | Y          | 7.38 E-2                                      | 24.228               | 23.060            | 24.759          | 1.199           | Y ●       |                        |  |                   |  |
|                 | <i>Heavy metal efflux pump Czca [Methylobacillus flagellatus KT]637938210 YP_545415</i>                                      |                      |                   |                 |                 |            |                                               |                      |                   |                 |                 |           |                        |  |                   |  |
| <b>MFLA1307</b> | 2.106                                                                                                                        |                      | 2.106             |                 | Y ●●            | Y          |                                               | 19.211               |                   | 19.211          |                 | Y ●       |                        |  |                   |  |
|                 | <i>" two component transcriptional regulator, winged helix family [Methylobacillus flagellatus KT]637938211 YP_545416 ""</i> |                      |                   |                 |                 |            |                                               |                      |                   |                 |                 |           |                        |  |                   |  |
| <b>MFLA1308</b> | 1.674                                                                                                                        | 0.000                | 2.068             | 0.667           | Y ●●            | Y          | 2.17 E-1                                      | 21.296               | 20.503            | 21.953          | -0.341          | Y ●       |                        |  |                   |  |
|                 | <i>periplasmic sensor signal transduction histidine kinase [Methylobacillus flagellatus KT]637938212 YP_545417</i>           |                      |                   |                 |                 |            |                                               |                      |                   |                 |                 |           |                        |  |                   |  |
| <b>MFLA1309</b> | 0.000                                                                                                                        | 0.000                |                   |                 |                 |            |                                               | 0.000                | 0.000             |                 |                 |           |                        |  |                   |  |
|                 | <i>" Integrase, catalytic region [Methylobacillus flagellatus KT]637938213 YP_545418 ""</i>                                  |                      |                   |                 |                 |            |                                               |                      |                   |                 |                 |           |                        |  |                   |  |
| <b>MFLA1310</b> | 0.000                                                                                                                        | 0.000                |                   |                 |                 |            |                                               | 0.000                | 0.000             |                 |                 |           |                        |  |                   |  |
|                 | <i>transposase IS3/IS911 [Methylobacillus flagellatus KT]637938214 YP_545419</i>                                             |                      |                   |                 |                 |            |                                               |                      |                   |                 |                 |           |                        |  |                   |  |

| ORF             | AM/OH <i>M. Flagellatus</i> Spectral Count                                                                                |                      |                   |                 |                 |            | AM/OH <i>M. Flagellatus</i> Protein Intensity |                      |                   |                 |                 |           | Spectral Count         |        | Protein Intensity |   |
|-----------------|---------------------------------------------------------------------------------------------------------------------------|----------------------|-------------------|-----------------|-----------------|------------|-----------------------------------------------|----------------------|-------------------|-----------------|-----------------|-----------|------------------------|--------|-------------------|---|
|                 | $q$ -value                                                                                                                | $\log_2$ Methylamine | $\log_2$ Methanol | $\log_2$ Sc Sum | $\log_2$ -Ratio | Regulation | $q$ -value                                    | $\log_2$ Methylamine | $\log_2$ Methanol | $\log_2$ PI Sum | $\log_2$ -Ratio | Consensus | Log <sub>2</sub> Ratio |        |                   |   |
| <b>MFLA1311</b> |                                                                                                                           | 0.000                | 0.000             |                 |                 |            |                                               | 0.000                | 0.000             |                 |                 |           |                        |        |                   |   |
|                 | <i>hypothetical protein [Methylobacillus flagellatus KT]637938215 YP_545420</i>                                           |                      |                   |                 |                 |            |                                               |                      |                   |                 |                 |           |                        |        |                   |   |
| <b>MFLA1312</b> |                                                                                                                           | 0.000                | 0.000             |                 |                 |            |                                               | 0.000                | 0.000             |                 |                 |           |                        |        |                   |   |
|                 | <i>hypothetical protein [Methylobacillus flagellatus KT]637938216 YP_545421</i>                                           |                      |                   |                 |                 |            |                                               |                      |                   |                 |                 |           |                        |        |                   |   |
| <b>MFLA1313</b> |                                                                                                                           | 0.000                | 0.000             |                 |                 |            |                                               | 0.000                | 0.000             |                 |                 |           |                        |        |                   |   |
|                 | <i>putative integrase [Methylobacillus flagellatus KT]637938217 YP_545422</i>                                             |                      |                   |                 |                 |            |                                               |                      |                   |                 |                 |           |                        |        |                   |   |
| <b>MFLA1314</b> |                                                                                                                           | 0.000                | 0.000             |                 |                 |            |                                               | 0.000                | 0.000             |                 |                 |           |                        |        |                   |   |
|                 | <i>phage integrase [Methylobacillus flagellatus KT]637938218 YP_545423</i>                                                |                      |                   |                 |                 |            |                                               |                      |                   |                 |                 |           |                        |        |                   |   |
| <b>MFLA1315</b> |                                                                                                                           | 3.235                |                   | 3.235           |                 | Y          | ●                                             | ●                    | Y                 | 22.607          |                 | 22.607    |                        | Y      | ●                 |   |
|                 | <i>MltA-interacting MipA [Methylobacillus flagellatus KT]637938220 YP_545424</i>                                          |                      |                   |                 |                 |            |                                               |                      |                   |                 |                 |           |                        |        |                   |   |
| <b>MFLA1316</b> |                                                                                                                           | 0.000                | 0.000             |                 |                 |            |                                               | 0.000                | 0.000             |                 |                 |           |                        |        |                   |   |
|                 | <i>hypothetical protein [Methylobacillus flagellatus KT]637938221 YP_545425</i>                                           |                      |                   |                 |                 |            |                                               |                      |                   |                 |                 |           |                        |        |                   |   |
| <b>MFLA1317</b> | 0                                                                                                                         | 7.805                | 6.311             | 8.244           | 1.459           | R          | ●                                             | ●                    | Y                 | 8.26 E-2        | 27.240          | 26.868    | 28.066                 | 0.347  | R                 | ● |
|                 | <i>hypothetical protein [Methylobacillus flagellatus KT]637938222 YP_545426</i>                                           |                      |                   |                 |                 |            |                                               |                      |                   |                 |                 |           |                        |        |                   |   |
| <b>MFLA1318</b> |                                                                                                                           | 0.813                | 1.000             | 1.910           | -0.187          | Y          | ●                                             | ●                    | Y                 | 21.254          | 20.393          | 21.887    | 0.861                  | Y      | ●                 |   |
|                 | <i>hypothetical protein [Methylobacillus flagellatus KT]637938223 YP_545427</i>                                           |                      |                   |                 |                 |            |                                               |                      |                   |                 |                 |           |                        |        |                   |   |
| <b>MFLA1319</b> | 9.53 E-6                                                                                                                  | 6.314                | 7.004             | 7.700           | -0.709          | G          | ●                                             | ●                    | Y                 | 1.1 E-2         | 26.748          | 27.833    | 28.390                 | -1.127 | G                 | ● |
|                 | <i>" aminotransferase, class I and II [Methylobacillus flagellatus KT]637938224 YP_545428 ""</i>                          |                      |                   |                 |                 |            |                                               |                      |                   |                 |                 |           |                        |        |                   |   |
| <b>MFLA1320</b> | 9.98 E-2                                                                                                                  | 5.377                | 5.001             | 6.201           | 0.373           | Y          | ●                                             | ●                    | Y                 | 2.38 E-1        | 23.540          | 23.696    | 24.620                 | -0.545 | Y                 | ● |
|                 | <i>" excinuclease ABC, B subunit [Methylobacillus flagellatus KT]637938225 YP_545429 ""</i>                               |                      |                   |                 |                 |            |                                               |                      |                   |                 |                 |           |                        |        |                   |   |
| <b>MFLA1321</b> |                                                                                                                           | 8.648                | 8.327             | 9.497           | 0.295           | Y          | ●                                             | ●                    | Y                 | 1.02 E-1        | 27.895          | 28.364    | 29.149                 | -0.486 | Y                 | ● |
|                 | <i>" ribonuclease, Rne/Rng family [Methylobacillus flagellatus KT]637938226 YP_545430 ""</i>                              |                      |                   |                 |                 |            |                                               |                      |                   |                 |                 |           |                        |        |                   |   |
| <b>MFLA1322</b> |                                                                                                                           | 0.521                | 3.056             | 3.285           | -1.530          | Y          | ●                                             | ●                    | Y                 | 7.49 E-2        | 19.673          | 22.178    | 22.412                 | -1.478 | Y                 | ● |
|                 | <i>" Pseudouridine synthase, RluD [Methylobacillus flagellatus KT]637938227 YP_545431 ""</i>                              |                      |                   |                 |                 |            |                                               |                      |                   |                 |                 |           |                        |        |                   |   |
| <b>MFLA1323</b> | 1.06 E-1                                                                                                                  | 5.327                | 5.610             | 6.475           | -0.274          | Y          | ●                                             | ●                    | Y                 | 1.49 E-1        | 24.092          | 23.688    | 24.904                 | 0.251  | Y                 | ● |
|                 | <i>" HAD-superfamily hydrolase, subfamily IA, variant 1 [Methylobacillus flagellatus KT]637938228 YP_545432 ""</i>        |                      |                   |                 |                 |            |                                               |                      |                   |                 |                 |           |                        |        |                   |   |
| <b>MFLA1324</b> | 0                                                                                                                         | 6.796                | 4.268             | 7.027           | 1.824           | R          | ●                                             | ●                    | Y                 | 6.03 E-2        | 24.149          | 25.171    | 25.749                 | -1.569 | Y                 | ● |
|                 | <i>peptidase S49 [Methylobacillus flagellatus KT]637938229 YP_545433</i>                                                  |                      |                   |                 |                 |            |                                               |                      |                   |                 |                 |           |                        |        |                   |   |
| <b>MFLA1325</b> | 1.12 E-8                                                                                                                  | 7.279                | 7.760             | 8.539           | -0.566          | G          | ●                                             | ●                    | Y                 | 1.66 E-2        | 26.671          | 27.217    | 27.970                 | -0.557 | G                 | ● |
|                 | <i>Glucose-6-phosphate isomerase [Methylobacillus flagellatus KT]637938230 YP_545434</i>                                  |                      |                   |                 |                 |            |                                               |                      |                   |                 |                 |           |                        |        |                   |   |
| <b>MFLA1326</b> |                                                                                                                           | 7.900                | 7.795             | 8.848           | 0.002           | Y          | ●                                             | ●                    | Y                 | 2.51 E-2        | 26.508          | 27.717    | 28.236                 | -1.419 | Y                 | ● |
|                 | <i>ribosomal protein S6 [Methylobacillus flagellatus KT]637938231 YP_545435</i>                                           |                      |                   |                 |                 |            |                                               |                      |                   |                 |                 |           |                        |        |                   |   |
| <b>MFLA1327</b> |                                                                                                                           |                      | 0.000             | 0.000           |                 | Y          | ●                                             | ●                    | Y                 |                 | 20.943          | 20.943    |                        | Y      | ●                 |   |
|                 | <i>single-strand binding protein/Primosomal replication protein n [Methylobacillus flagellatus KT]637938232 YP_545436</i> |                      |                   |                 |                 |            |                                               |                      |                   |                 |                 |           |                        |        |                   |   |
| <b>MFLA1328</b> | 1.63 E-3                                                                                                                  | 6.226                | 5.580             | 6.939           | 0.649           | R          | ●                                             | ●                    | Y                 | 2.18 E-1        | 26.469          | 26.188    | 27.335                 | -0.029 | Y                 | ● |
|                 | <i>ribosomal protein S18 [Methylobacillus flagellatus KT]637938233 YP_545437</i>                                          |                      |                   |                 |                 |            |                                               |                      |                   |                 |                 |           |                        |        |                   |   |
| <b>MFLA1329</b> | 0                                                                                                                         | 7.395                | 8.778             | 9.247           | -1.379          | G          | ●                                             | ●                    | Y                 | 3.76 E-2        | 28.966          | 29.300    | 30.143                 | -0.331 | G                 | ● |
|                 | <i>ribosomal protein L9 [Methylobacillus flagellatus KT]637938234 YP_545438</i>                                           |                      |                   |                 |                 |            |                                               |                      |                   |                 |                 |           |                        |        |                   |   |
| <b>MFLA1330</b> | 1.13 E-2                                                                                                                  | 5.053                | 5.686             | 6.404           | -0.608          | Y          | ●                                             | ●                    | Y                 | 1.53 E-2        | 24.601          | 25.289    | 25.986                 | -0.696 | Y                 | ● |
|                 | <i>replicative DNA helicase [Methylobacillus flagellatus KT]637938235 YP_545439</i>                                       |                      |                   |                 |                 |            |                                               |                      |                   |                 |                 |           |                        |        |                   |   |
| <b>MFLA1331</b> |                                                                                                                           | 4.044                | 4.508             | 5.295           | 0.625           | Y          | ●                                             | ●                    | Y                 | 1.17 E-2        | 21.936          | 21.908    | 22.922                 | 1.028  | Y                 | ● |
|                 | <i>alanine racemase [Methylobacillus flagellatus KT]637938236 YP_545440</i>                                               |                      |                   |                 |                 |            |                                               |                      |                   |                 |                 |           |                        |        |                   |   |
| <b>MFLA1332</b> |                                                                                                                           | 4.283                | 4.324             | 5.304           | -0.091          | Y          | ●                                             | ●                    | Y                 | 1.08 E-2        | 22.442          | 24.012    | 24.431                 | -1.628 | Y                 | ● |
|                 | <i>DNA repair protein Rada [Methylobacillus flagellatus KT]637938237 YP_545441</i>                                        |                      |                   |                 |                 |            |                                               |                      |                   |                 |                 |           |                        |        |                   |   |

| ORF             | AM/OH <i>M. Flagellatus</i> Spectral Count                                                                     |                              |                           |                         |                        | AM/OH <i>M. Flagellatus</i> Protein Intensity |          |                              |                           |                         | Consensus | Spectral Count         |                        | Protein Intensity |   |   |
|-----------------|----------------------------------------------------------------------------------------------------------------|------------------------------|---------------------------|-------------------------|------------------------|-----------------------------------------------|----------|------------------------------|---------------------------|-------------------------|-----------|------------------------|------------------------|-------------------|---|---|
|                 | q-value                                                                                                        | log <sub>2</sub> Methylamine | log <sub>2</sub> Methanol | log <sub>2</sub> Sc Sum | log <sub>2</sub> Ratio | Regulation                                    | q-value  | log <sub>2</sub> Methylamine | log <sub>2</sub> Methanol | log <sub>2</sub> PI Sum |           | log <sub>2</sub> Ratio | Log <sub>2</sub> Ratio | -7                | 0 | 7 |
| <b>MFLA1333</b> |                                                                                                                | 0.000                        | 0.000                     |                         |                        | ■ ■                                           |          | 0.000                        | 0.000                     |                         |           | ■                      |                        |                   |   |   |
|                 | <i>hypothetical protein [Methylobacillus flagellatus KT]637938239 YP_545442</i>                                |                              |                           |                         |                        |                                               |          |                              |                           |                         |           |                        |                        |                   |   |   |
| <b>MFLA1334</b> |                                                                                                                | 0.000                        | 0.000                     |                         |                        | ■ ■                                           |          | 0.000                        | 0.000                     |                         |           | ■                      |                        |                   |   |   |
|                 | <i>methylation [Methylobacillus flagellatus KT]637938240 YP_545443</i>                                         |                              |                           |                         |                        |                                               |          |                              |                           |                         |           |                        |                        |                   |   |   |
| <b>MFLA1335</b> |                                                                                                                | 0.000                        | 0.000                     |                         |                        | ■ ■                                           |          | 0.000                        | 0.000                     |                         |           | ■                      |                        |                   |   |   |
|                 | <i>methylation [Methylobacillus flagellatus KT]637938241 YP_545444</i>                                         |                              |                           |                         |                        |                                               |          |                              |                           |                         |           |                        |                        |                   |   |   |
| <b>MFLA1336</b> |                                                                                                                | 0.000                        | 0.000                     |                         |                        | ■ ■                                           |          | 0.000                        | 0.000                     |                         |           | ■                      |                        |                   |   |   |
|                 | <i>type II and III secretion system protein [Methylobacillus flagellatus KT]637938242 YP_545445</i>            |                              |                           |                         |                        |                                               |          |                              |                           |                         |           |                        |                        |                   |   |   |
| <b>MFLA1337</b> |                                                                                                                | 0.000                        | 0.000                     |                         |                        | ■ ■                                           |          | 0.000                        | 0.000                     |                         |           | ■                      |                        |                   |   |   |
|                 | <i>hypothetical protein [Methylobacillus flagellatus KT]637938243 YP_545446</i>                                |                              |                           |                         |                        |                                               |          |                              |                           |                         |           |                        |                        |                   |   |   |
| <b>MFLA1338</b> |                                                                                                                | 0.000                        | 0.000                     |                         |                        | ■ ■                                           |          | 0.000                        | 0.000                     |                         |           | ■                      |                        |                   |   |   |
|                 | <i>putative transmembrane protein [Methylobacillus flagellatus KT]637938244 YP_545447</i>                      |                              |                           |                         |                        |                                               |          |                              |                           |                         |           |                        |                        |                   |   |   |
| <b>MFLA1339</b> |                                                                                                                | 0.000                        | 0.000                     |                         |                        | ■ ■                                           |          | 0.000                        | 0.000                     |                         |           | ■                      |                        |                   |   |   |
|                 | <i>hypothetical protein [Methylobacillus flagellatus KT]637938245 YP_545448</i>                                |                              |                           |                         |                        |                                               |          |                              |                           |                         |           |                        |                        |                   |   |   |
| <b>MFLA1340</b> |                                                                                                                | 0.000                        | 0.000                     |                         |                        | ■ ■                                           |          | 0.000                        | 0.000                     |                         |           | ■                      |                        |                   |   |   |
|                 | <i>hypothetical protein [Methylobacillus flagellatus KT]637938246 YP_545449</i>                                |                              |                           |                         |                        |                                               |          |                              |                           |                         |           |                        |                        |                   |   |   |
| <b>MFLA1341</b> |                                                                                                                | 0.000                        | 0.000                     |                         |                        | ■ ■                                           |          | 0.000                        | 0.000                     |                         |           | ■                      |                        |                   |   |   |
|                 | <i>type II secretion system protein E [Methylobacillus flagellatus KT]637938247 YP_545450</i>                  |                              |                           |                         |                        |                                               |          |                              |                           |                         |           |                        |                        |                   |   |   |
| <b>MFLA1342</b> |                                                                                                                | 0.000                        | 0.000                     |                         |                        | ■ ■                                           |          | 0.000                        | 0.000                     |                         |           | ■                      |                        |                   |   |   |
|                 | <i>type II secretion system protein [Methylobacillus flagellatus KT]637938248 YP_545451</i>                    |                              |                           |                         |                        |                                               |          |                              |                           |                         |           |                        |                        |                   |   |   |
| <b>MFLA1343</b> |                                                                                                                | 0.000                        | 0.000                     |                         |                        | ■ ■                                           |          | 0.000                        | 0.000                     |                         |           | ■                      |                        |                   |   |   |
|                 | <i>General secretion pathway protein G [Methylobacillus flagellatus KT]637938249 YP_545452</i>                 |                              |                           |                         |                        |                                               |          |                              |                           |                         |           |                        |                        |                   |   |   |
| <b>MFLA1344</b> |                                                                                                                | 0.000                        | 0.000                     |                         |                        | ■ ■                                           |          | 0.000                        | 0.000                     |                         |           | ■                      |                        |                   |   |   |
|                 | <i>hypothetical protein [Methylobacillus flagellatus KT]637938250 YP_545453</i>                                |                              |                           |                         |                        |                                               |          |                              |                           |                         |           |                        |                        |                   |   |   |
| <b>MFLA1345</b> |                                                                                                                | 0.000                        | 0.000                     |                         |                        | ■ ■                                           |          | 0.000                        | 0.000                     |                         |           | ■                      |                        |                   |   |   |
|                 | <i>" Type I secretion outer membrane protein, TolC [Methylobacillus flagellatus KT]637938251 YP_545454 ""</i>  |                              |                           |                         |                        |                                               |          |                              |                           |                         |           |                        |                        |                   |   |   |
| <b>MFLA1346</b> |                                                                                                                | 0.000                        | 0.000                     |                         |                        | ■ ■                                           |          | 0.000                        | 0.000                     |                         |           | ■                      |                        |                   |   |   |
|                 | <i>" Type I secretion membrane fusion protein, HlyD [Methylobacillus flagellatus KT]637938252 YP_545455 ""</i> |                              |                           |                         |                        |                                               |          |                              |                           |                         |           |                        |                        |                   |   |   |
| <b>MFLA1347</b> |                                                                                                                | 0.000                        | 0.000                     |                         |                        | ■ ■                                           |          | 0.000                        | 0.000                     |                         |           | ■                      |                        |                   |   |   |
|                 | <i>" Type I secretion system ATPase, PrtD [Methylobacillus flagellatus KT]637938253 YP_545456 ""</i>           |                              |                           |                         |                        |                                               |          |                              |                           |                         |           |                        |                        |                   |   |   |
| <b>MFLA1348</b> |                                                                                                                | 0.000                        | 0.000                     |                         |                        | ■ ■                                           |          | 0.000                        | 0.000                     |                         |           | ■                      |                        |                   |   |   |
|                 | <i>" Type I secretion system ATPase, PrtD [Methylobacillus flagellatus KT]637938254 YP_545457 ""</i>           |                              |                           |                         |                        |                                               |          |                              |                           |                         |           |                        |                        |                   |   |   |
| <b>MFLA1349</b> |                                                                                                                | 0.000                        | 0.000                     |                         |                        | ■ ■                                           |          | 0.000                        | 0.000                     |                         |           | ■                      |                        |                   |   |   |
|                 | <i>Hemolysin-type calcium-binding region [Methylobacillus flagellatus KT]637938255 YP_545458</i>               |                              |                           |                         |                        |                                               |          |                              |                           |                         |           |                        |                        |                   |   |   |
| <b>MFLA1350</b> |                                                                                                                | 3.648                        |                           | 3.648                   |                        | Y ● ● Y                                       |          | 23.160                       |                           | 23.160                  |           | Y ●                    |                        |                   |   |   |
|                 | <i>hypothetical protein [Methylobacillus flagellatus KT]637938256 YP_545459</i>                                |                              |                           |                         |                        |                                               |          |                              |                           |                         |           |                        |                        |                   |   |   |
| <b>MFLA1351</b> |                                                                                                                | 0.000                        | 0.000                     |                         |                        | ■ ■                                           |          | 0.000                        | 0.000                     |                         |           | ■                      |                        |                   |   |   |
|                 | <i>TonB-dependent receptor [Methylobacillus flagellatus KT]637938257 YP_545460</i>                             |                              |                           |                         |                        |                                               |          |                              |                           |                         |           |                        |                        |                   |   |   |
| <b>MFLA1352</b> |                                                                                                                | 0.000                        | 0.000                     |                         |                        | ■ ■                                           |          | 0.000                        | 0.000                     |                         |           | ■                      |                        |                   |   |   |
|                 | <i>putative FecR [Methylobacillus flagellatus KT]637938258 YP_545461</i>                                       |                              |                           |                         |                        |                                               |          |                              |                           |                         |           |                        |                        |                   |   |   |
| <b>MFLA1353</b> |                                                                                                                | 0.000                        | 0.000                     |                         |                        | ■ ■                                           |          | 0.000                        | 0.000                     |                         |           | ■                      |                        |                   |   |   |
|                 | <i>sigma-24 (FecI-like) [Methylobacillus flagellatus KT]637938259 YP_545462</i>                                |                              |                           |                         |                        |                                               |          |                              |                           |                         |           |                        |                        |                   |   |   |
| <b>MFLA1354</b> |                                                                                                                | 0.521                        | 2.372                     | 2.725                   | -0.814                 | Y ● ● Y                                       | 2.28 E-1 | 21.346                       | 22.557                    | 23.075                  | -0.032    | Y ●                    |                        |                   |   |   |
|                 | <i>Succinylglutamate desuccinylase/aspartoacylase [Methylobacillus flagellatus KT]637938260 YP_545463</i>      |                              |                           |                         |                        |                                               |          |                              |                           |                         |           |                        |                        |                   |   |   |



| ORF             | AM/OH <i>M. Flagellatus</i> Spectral Count                                                                          |                              |                           |                         |                        |            | AM/OH <i>M. Flagellatus</i> Protein Intensity |                              |                           |                         |                        |      | Consensus | Log <sub>2</sub> Ratio |
|-----------------|---------------------------------------------------------------------------------------------------------------------|------------------------------|---------------------------|-------------------------|------------------------|------------|-----------------------------------------------|------------------------------|---------------------------|-------------------------|------------------------|------|-----------|------------------------|
|                 | q-value                                                                                                             | log <sub>2</sub> Methylamine | log <sub>2</sub> Methanol | log <sub>2</sub> Sc Sum | log <sub>2</sub> Ratio | Regulation | q-value                                       | log <sub>2</sub> Methylamine | log <sub>2</sub> Methanol | log <sub>2</sub> PI Sum | log <sub>2</sub> Ratio |      |           |                        |
| <b>MFLA1355</b> | 8.24 E-2                                                                                                            | 6.097                        | 5.788                     | 6.951                   | 0.308                  | Y ●●● Y    | 8.35 E-3                                      | 25.518                       | 25.131                    | 26.337                  | 0.389                  | Y ●● |           |                        |
|                 | <i>YceI [Methylobacillus flagellatus KT]637938261 YP_545464</i>                                                     |                              |                           |                         |                        |            |                                               |                              |                           |                         |                        |      |           |                        |
| <b>MFLA1356</b> | 1.69 E-2                                                                                                            | 7.606                        | 7.598                     | 8.602                   | -0.014                 | Y ●●● Y    | 1.58 E-1                                      | 27.077                       | 26.821                    | 27.955                  | 0.195                  | Y ●● |           |                        |
|                 | <i>protein of unknown function DUF748 [Methylobacillus flagellatus KT]637938262 YP_545465</i>                       |                              |                           |                         |                        |            |                                               |                              |                           |                         |                        |      |           |                        |
| <b>MFLA1357</b> | 0                                                                                                                   | 8.645                        | 6.829                     | 9.006                   | 1.852                  | R ●●● Y    | 1.99 E-2                                      | 24.918                       | 24.392                    | 25.679                  | 0.537                  | R ●● |           |                        |
|                 | <i>hypothetical protein [Methylobacillus flagellatus KT]637938263 YP_545466</i>                                     |                              |                           |                         |                        |            |                                               |                              |                           |                         |                        |      |           |                        |
| <b>MFLA1358</b> |                                                                                                                     | 4.413                        | 4.438                     | 5.425                   | -0.022                 | Y ●●● Y    | 5.12 E-2                                      | 23.643                       | 23.249                    | 24.459                  | 0.413                  | Y ●● |           |                        |
|                 | <i>GTP cyclohydrolase II [Methylobacillus flagellatus KT]637938264 YP_545467</i>                                    |                              |                           |                         |                        |            |                                               |                              |                           |                         |                        |      |           |                        |
| <b>MFLA1359</b> |                                                                                                                     | 3.461                        |                           | 3.461                   |                        | Y ●●● Y    |                                               | 22.221                       |                           | 22.221                  |                        | Y ●● |           |                        |
|                 | <i>" RND efflux system, outer membrane lipoprotein, NodT [Methylobacillus flagellatus KT]637938265 YP_545468 ""</i> |                              |                           |                         |                        |            |                                               |                              |                           |                         |                        |      |           |                        |
| <b>MFLA1360</b> |                                                                                                                     | 3.982                        | 1.585                     | 4.232                   | 1.397                  | Y ●●● Y    | 6.81 E-2                                      | 22.201                       | 19.979                    | 22.481                  | 1.207                  | Y ●● |           |                        |
|                 | <i>Hydrophobe/amphiphile efflux-1 HAE1 [Methylobacillus flagellatus KT]637938266 YP_545469</i>                      |                              |                           |                         |                        |            |                                               |                              |                           |                         |                        |      |           |                        |
| <b>MFLA1361</b> |                                                                                                                     | 4.581                        | 3.834                     | 5.256                   | 0.758                  | Y ●●● Y    | 1.08 E-2                                      | 23.757                       | 23.314                    | 24.553                  | 0.441                  | Y ●● |           |                        |
|                 | <i>secretion protein HlyD [Methylobacillus flagellatus KT]637938267 YP_545470</i>                                   |                              |                           |                         |                        |            |                                               |                              |                           |                         |                        |      |           |                        |
| <b>MFLA1362</b> |                                                                                                                     |                              | 1.000                     | 1.000                   |                        | Y ●●● Y    |                                               |                              | 20.327                    | 20.327                  |                        | Y ●● |           |                        |
|                 | <i>" transcriptional regulator, TetR family [Methylobacillus flagellatus KT]637938268 YP_545471 ""</i>              |                              |                           |                         |                        |            |                                               |                              |                           |                         |                        |      |           |                        |
| <b>MFLA1363</b> |                                                                                                                     | 0.000                        | 0.000                     |                         |                        | ●●●        |                                               | 0.000                        | 0.000                     |                         |                        | ●●   |           |                        |
|                 | <i>protein of unknown function DUF204 [Methylobacillus flagellatus KT]637938269 YP_545472</i>                       |                              |                           |                         |                        |            |                                               |                              |                           |                         |                        |      |           |                        |
| <b>MFLA1364</b> |                                                                                                                     | 1.813                        |                           | 1.813                   |                        | Y ●●● Y    |                                               | 19.262                       |                           | 19.262                  |                        | Y ●● |           |                        |
|                 | <i>lipopolysaccharide kinase [Methylobacillus flagellatus KT]637938270 YP_545473</i>                                |                              |                           |                         |                        |            |                                               |                              |                           |                         |                        |      |           |                        |
| <b>MFLA1365</b> |                                                                                                                     | 0.000                        | 0.000                     |                         |                        | ●●●        |                                               | 0.000                        | 0.000                     |                         |                        | ●●   |           |                        |
|                 | <i>Lysine exporter protein (LYSE/YGGA) [Methylobacillus flagellatus KT]637938271 YP_545474</i>                      |                              |                           |                         |                        |            |                                               |                              |                           |                         |                        |      |           |                        |
| <b>MFLA1366</b> |                                                                                                                     | 0.000                        | 0.000                     |                         |                        | ●●●        |                                               | 0.000                        | 0.000                     |                         |                        | ●●   |           |                        |
|                 | <i>hypothetical protein [Methylobacillus flagellatus KT]637938272 YP_545475</i>                                     |                              |                           |                         |                        |            |                                               |                              |                           |                         |                        |      |           |                        |
| <b>MFLA1367</b> |                                                                                                                     | 4.974                        | 3.725                     | 5.481                   | 1.261                  | Y ●●● Y    | 1.97 E-1                                      | 22.592                       | 22.796                    | 23.698                  | -0.085                 | Y ●● |           |                        |
|                 | <i>" 1,4-alpha-glucan branching enzyme [Methylobacillus flagellatus KT]637938273 YP_545476 ""</i>                   |                              |                           |                         |                        |            |                                               |                              |                           |                         |                        |      |           |                        |
| <b>MFLA1368</b> | 3.18 E-4                                                                                                            | 6.034                        | 5.252                     | 6.695                   | 0.754                  | R ●●● Y    | 3.09 E-2                                      | 24.904                       | 24.315                    | 25.639                  | 0.573                  | R ●● |           |                        |
|                 | <i>Glucose-1-phosphate adenylyltransferase [Methylobacillus flagellatus KT]637938274 YP_545477</i>                  |                              |                           |                         |                        |            |                                               |                              |                           |                         |                        |      |           |                        |
| <b>MFLA1369</b> |                                                                                                                     | 3.591                        | 3.595                     | 4.593                   | -0.006                 | Y ●●● Y    | 5.2 E-2                                       | 19.983                       | 21.410                    | 21.866                  | -1.479                 | Y ●● |           |                        |
|                 | <i>" glycoside hydrolase, family 57 [Methylobacillus flagellatus KT]637938275 YP_545478 ""</i>                      |                              |                           |                         |                        |            |                                               |                              |                           |                         |                        |      |           |                        |
| <b>MFLA1370</b> | 2.96 E-2                                                                                                            | 7.286                        | 7.248                     | 8.267                   | 0.068                  | Y ●●● Y    | 1.13 E-1                                      | 25.991                       | 26.279                    | 27.142                  | -0.325                 | Y ●● |           |                        |
|                 | <i>4-alpha-glucanotransferase [Methylobacillus flagellatus KT]637938276 YP_545479</i>                               |                              |                           |                         |                        |            |                                               |                              |                           |                         |                        |      |           |                        |
| <b>MFLA1371</b> |                                                                                                                     | 4.128                        | 3.807                     | 4.976                   | 0.106                  | Y ●●● Y    | 1.93 E-1                                      | 23.171                       | 22.885                    | 24.035                  | 0.100                  | Y ●● |           |                        |
|                 | <i>hypothetical protein [Methylobacillus flagellatus KT]637938277 YP_545480</i>                                     |                              |                           |                         |                        |            |                                               |                              |                           |                         |                        |      |           |                        |
| <b>MFLA1372</b> | 3.23 E-4                                                                                                            | 6.420                        | 5.693                     | 7.102                   | 0.736                  | R ●●● Y    | 2.53 E-1                                      | 24.791                       | 24.802                    | 25.797                  | -0.012                 | Y ●● |           |                        |
|                 | <i>" glycosyl transferase, family 2 [Methylobacillus flagellatus KT]637938278 YP_545481 ""</i>                      |                              |                           |                         |                        |            |                                               |                              |                           |                         |                        |      |           |                        |
| <b>MFLA1373</b> |                                                                                                                     | 4.915                        | 4.040                     | 5.543                   | 1.044                  | Y ●●● Y    | 1.57 E-1                                      | 23.870                       | 23.486                    | 24.691                  | 0.658                  | Y ●● |           |                        |
|                 | <i>putative beta (1-6) glucan synthase [Methylobacillus flagellatus KT]637938279 YP_545482</i>                      |                              |                           |                         |                        |            |                                               |                              |                           |                         |                        |      |           |                        |
| <b>MFLA1374</b> |                                                                                                                     | 0.000                        | 0.000                     |                         |                        | ●●●        |                                               | 0.000                        | 0.000                     |                         |                        | ●●   |           |                        |
|                 | <i>hypothetical protein [Methylobacillus flagellatus KT]637938280 YP_545483</i>                                     |                              |                           |                         |                        |            |                                               |                              |                           |                         |                        |      |           |                        |
| <b>MFLA1375</b> |                                                                                                                     | 0.000                        | 0.000                     |                         |                        | ●●●        |                                               | 0.000                        | 0.000                     |                         |                        | ●●   |           |                        |
|                 | <i>hypothetical protein [Methylobacillus flagellatus KT]637938281 YP_545484</i>                                     |                              |                           |                         |                        |            |                                               |                              |                           |                         |                        |      |           |                        |
| <b>MFLA1376</b> |                                                                                                                     | 0.000                        | 0.000                     |                         |                        | ●●●        |                                               | 0.000                        | 0.000                     |                         |                        | ●●   |           |                        |
|                 | <i>GtrA-like protein [Methylobacillus flagellatus KT]637938282 YP_545485</i>                                        |                              |                           |                         |                        |            |                                               |                              |                           |                         |                        |      |           |                        |



| ORF             | AM/OH <i>M. Flagellatus</i> Spectral Count                                                                                 |                      |                   |                 |                | AM/OH <i>M. Flagellatus</i> Protein Intensity |            |                      |                   |                 | Spectral Count |           | Protein Intensity      |  |  |
|-----------------|----------------------------------------------------------------------------------------------------------------------------|----------------------|-------------------|-----------------|----------------|-----------------------------------------------|------------|----------------------|-------------------|-----------------|----------------|-----------|------------------------|--|--|
|                 | $q$ -value                                                                                                                 | $\log_2$ Methylamine | $\log_2$ Methanol | $\log_2$ Sc Sum | $\log_2$ Ratio | Regulation                                    | $q$ -value | $\log_2$ Methylamine | $\log_2$ Methanol | $\log_2$ PI Sum | $\log_2$ Ratio | Consensus | Log <sub>2</sub> Ratio |  |  |
| <b>MFLA1377</b> |                                                                                                                            | 0.521                | 2.689             | 2.979           | -1.056         | Y ●● Y                                        | 7.77 E-2   | 18.463               | 22.395            | 22.486          | -2.873         | Y ●       |                        |  |  |
|                 | " glycosyl transferase, family 2 [Methylobacillus flagellatus KT]637938283 YP_545486 ""                                    |                      |                   |                 |                |                                               |            |                      |                   |                 |                |           |                        |  |  |
| <b>MFLA1378</b> |                                                                                                                            | 0.000                | 0.000             |                 |                | ●●                                            |            | 0.000                | 0.000             |                 |                | ●         |                        |  |  |
|                 | hypothetical protein [Methylobacillus flagellatus KT]637938284 YP_545487                                                   |                      |                   |                 |                |                                               |            |                      |                   |                 |                |           |                        |  |  |
| <b>MFLA1379</b> |                                                                                                                            | 0.000                | 0.000             |                 |                | ●●                                            |            | 0.000                | 0.000             |                 |                | ●         |                        |  |  |
|                 | 4Fe-4S cluster binding [Methylobacillus flagellatus KT]637938285 YP_545488                                                 |                      |                   |                 |                |                                               |            |                      |                   |                 |                |           |                        |  |  |
| <b>MFLA1380</b> |                                                                                                                            | 2.328                | 2.595             | 3.468           | 0.751          | Y ●● Y                                        | 1.41 E-1   | 22.360               | 22.653            | 23.514          | 1.014          | Y ●       |                        |  |  |
|                 | protein of unknown function UPF0079 [Methylobacillus flagellatus KT]637938286 YP_545489                                    |                      |                   |                 |                |                                               |            |                      |                   |                 |                |           |                        |  |  |
| <b>MFLA1381</b> |                                                                                                                            | 4.357                | 5.197             | 5.837           | -0.806         | Y ●● Y                                        | 8.26 E-2   | 22.888               | 23.931            | 24.502          | -1.351         | Y ●       |                        |  |  |
|                 | N-acetylmuramoyl-L-alanine amidase [Methylobacillus flagellatus KT]637938287 YP_545490                                     |                      |                   |                 |                |                                               |            |                      |                   |                 |                |           |                        |  |  |
| <b>MFLA1382</b> |                                                                                                                            | 1.4 E-4              | 6.306             | 6.881           | 7.622          | G ●●                                          | 1.38 E-2   | 24.968               | 26.261            | 26.755          | -1.327         | G ●       |                        |  |  |
|                 | beta-lactamase-like protein [Methylobacillus flagellatus KT]637938288 YP_545491                                            |                      |                   |                 |                |                                               |            |                      |                   |                 |                |           |                        |  |  |
| <b>MFLA1383</b> |                                                                                                                            | 0                    | 8.190             | 9.479           | 9.974          | G ●● Y                                        | 2.7 E-2    | 28.257               | 29.143            | 29.767          | -0.942         | G ●       |                        |  |  |
|                 | hypothetical protein [Methylobacillus flagellatus KT]637938289 YP_545492                                                   |                      |                   |                 |                |                                               |            |                      |                   |                 |                |           |                        |  |  |
| <b>MFLA1384</b> |                                                                                                                            | 3.283                | 3.928             | 4.641           | -0.651         | Y ●● Y                                        | 5.87 E-2   | 21.363               | 22.539            | 23.068          | -1.298         | Y ●       |                        |  |  |
|                 | DNA mismatch repair protein MutL [Methylobacillus flagellatus KT]637938290 YP_545493                                       |                      |                   |                 |                |                                               |            |                      |                   |                 |                |           |                        |  |  |
| <b>MFLA1385</b> |                                                                                                                            | 2.307                | 1.322             | 2.897           | -0.155         | Y ●● Y                                        | 1.13 E-1   | 22.404               | 19.104            | 22.544          | 2.096          | Y ●       |                        |  |  |
|                 | tRNA delta(2)-isopentenylpyrophosphate transferase [Methylobacillus flagellatus KT]637938291 YP_545494                     |                      |                   |                 |                |                                               |            |                      |                   |                 |                |           |                        |  |  |
| <b>MFLA1386</b> |                                                                                                                            | 2.69 E-2             | 5.464             | 5.911           | 6.705          | Y ●● Y                                        | 1.01 E-2   | 24.138               | 25.069            | 25.677          | -0.943         | Y ●       |                        |  |  |
|                 | " aminotransferase, class I and II [Methylobacillus flagellatus KT]637938292 YP_545495 ""                                  |                      |                   |                 |                |                                               |            |                      |                   |                 |                |           |                        |  |  |
| <b>MFLA1387</b> |                                                                                                                            | 3.610                | 3.739             | 4.676           | -0.193         | Y ●● Y                                        | 1.4 E-1    | 22.660               | 22.425            | 23.547          | 0.191          | Y ●       |                        |  |  |
|                 | twitching motility protein [Methylobacillus flagellatus KT]637938293 YP_545496                                             |                      |                   |                 |                |                                               |            |                      |                   |                 |                |           |                        |  |  |
| <b>MFLA1388</b> |                                                                                                                            | 0.000                | 0.000             |                 |                | ●●                                            |            | 0.000                | 0.000             |                 |                | ●         |                        |  |  |
|                 | diguanylate cyclase/phosphodiesterase (GGDEF & EAL domains) [Methylobacillus flagellatus KT]637938294 YP_545497            |                      |                   |                 |                |                                               |            |                      |                   |                 |                |           |                        |  |  |
| <b>MFLA1389</b> |                                                                                                                            | 4.601                | 4.328             | 5.471           | 0.264          | Y ●● Y                                        | 1.88 E-1   | 22.483               | 22.830            | 23.667          | -0.596         | Y ●       |                        |  |  |
|                 | TPR repeat [Methylobacillus flagellatus KT]637938295 YP_545498                                                             |                      |                   |                 |                |                                               |            |                      |                   |                 |                |           |                        |  |  |
| <b>MFLA1390</b> |                                                                                                                            | 0.000                | 0.000             |                 |                | ●●                                            |            | 0.000                | 0.000             |                 |                | ●         |                        |  |  |
|                 | protein of unknown function DUF752 [Methylobacillus flagellatus KT]637938296 YP_545499                                     |                      |                   |                 |                |                                               |            |                      |                   |                 |                |           |                        |  |  |
| <b>MFLA1391</b> |                                                                                                                            | 2.418                | 3.787             | 4.259           | -1.181         | Y ●● Y                                        | 9.64 E-2   | 21.085               | 22.461            | 22.931          | -1.092         | Y ●       |                        |  |  |
|                 | " molybdenum ABC transporter, periplasmic molybdate-binding protein [Methylobacillus flagellatus KT]637938297 YP_545500 "" |                      |                   |                 |                |                                               |            |                      |                   |                 |                |           |                        |  |  |
| <b>MFLA1392</b> |                                                                                                                            | 0.000                | 0.000             |                 |                | ●●                                            |            | 0.000                | 0.000             |                 |                | ●         |                        |  |  |
|                 | " Molybdate ABC transporter, permease protein [Methylobacillus flagellatus KT]637938298 YP_545501 ""                       |                      |                   |                 |                |                                               |            |                      |                   |                 |                |           |                        |  |  |
| <b>MFLA1393</b> |                                                                                                                            | 1.398                | 2.410             | 2.991           | 0.140          | Y ●● Y                                        | 1.81 E-1   | 19.914               | 21.453            | 21.879          | -0.344         | Y ●       |                        |  |  |
|                 | ABC transporter related [Methylobacillus flagellatus KT]637938299 YP_545502                                                |                      |                   |                 |                |                                               |            |                      |                   |                 |                |           |                        |  |  |
| <b>MFLA1394</b> |                                                                                                                            | 0.000                | 0.000             |                 |                | ●●                                            |            | 0.000                | 0.000             |                 |                | ●         |                        |  |  |
|                 | Methyltransferase type 12 [Methylobacillus flagellatus KT]637938300 YP_545503                                              |                      |                   |                 |                |                                               |            |                      |                   |                 |                |           |                        |  |  |
| <b>MFLA1395</b> |                                                                                                                            | 4.656                | 4.964             | 5.818           | -0.283         | Y ●● Y                                        | 1.02 E-1   | 24.730               | 25.088            | 25.920          | -0.313         | Y ●       |                        |  |  |
|                 | putative phage repressor [Methylobacillus flagellatus KT]637938301 YP_545504                                               |                      |                   |                 |                |                                               |            |                      |                   |                 |                |           |                        |  |  |
| <b>MFLA1396</b> |                                                                                                                            | 0.000                | 0.000             |                 |                | ●●                                            |            | 0.000                | 0.000             |                 |                | ●         |                        |  |  |
|                 | hypothetical protein [Methylobacillus flagellatus KT]637938302 YP_545505                                                   |                      |                   |                 |                |                                               |            |                      |                   |                 |                |           |                        |  |  |
| <b>MFLA1397</b> |                                                                                                                            | 0.521                |                   | 0.521           |                | Y ●● Y                                        |            | 20.272               |                   | 20.272          |                | Y ●       |                        |  |  |
|                 | putative phospholipase [Methylobacillus flagellatus KT]637938303 YP_545506                                                 |                      |                   |                 |                |                                               |            |                      |                   |                 |                |           |                        |  |  |
| <b>MFLA1398</b> |                                                                                                                            | 6.66 E-2             | 5.109             | 5.543           | 6.342          | Y ●● Y                                        | 8.9 E-2    | 23.368               | 24.244            | 24.872          | -1.568         | Y ●       |                        |  |  |
|                 | hypothetical protein [Methylobacillus flagellatus KT]637938306 YP_545507                                                   |                      |                   |                 |                |                                               |            |                      |                   |                 |                |           |                        |  |  |

| ORF             | AM/OH <i>M. Flagellatus</i> Spectral Count                                                                                        |                              |                           |                         |                        | AM/OH <i>M. Flagellatus</i> Protein Intensity |          |                              |                           |                         | Spectral Count         |           | Protein Intensity |  | Log <sub>2</sub> Ratio |
|-----------------|-----------------------------------------------------------------------------------------------------------------------------------|------------------------------|---------------------------|-------------------------|------------------------|-----------------------------------------------|----------|------------------------------|---------------------------|-------------------------|------------------------|-----------|-------------------|--|------------------------|
|                 | q-value                                                                                                                           | log <sub>2</sub> Methylamine | log <sub>2</sub> Methanol | log <sub>2</sub> Sc Sum | log <sub>2</sub> Ratio | Regulation                                    | q-value  | log <sub>2</sub> Methylamine | log <sub>2</sub> Methanol | log <sub>2</sub> PI Sum | log <sub>2</sub> Ratio | Consensus |                   |  |                        |
| <b>MFLA1399</b> | 3.92 E-2                                                                                                                          | 5.306                        | 5.298                     | 6.302                   | -0.103                 | Y ●●● Y                                       | 2.48 E-1 | 24.070                       | 24.139                    | 25.105                  | -0.119                 | Y ●●      |                   |  |                        |
|                 | <i>sulfatase [Methylobacillus flagellatus KT]637938307 YP_545508</i>                                                              |                              |                           |                         |                        |                                               |          |                              |                           |                         |                        |           |                   |  |                        |
| <b>MFLA1400</b> | 1.59 E-2                                                                                                                          | 3.983                        | 5.700                     | 6.083                   | -0.712                 | Y ●●● Y                                       | 7.49 E-2 | 21.350                       | 24.683                    | 24.819                  | -2.289                 | Y ●●      |                   |  |                        |
|                 | <i>GTP cyclohydrolase I [Methylobacillus flagellatus KT]637938308 YP_545509</i>                                                   |                              |                           |                         |                        |                                               |          |                              |                           |                         |                        |           |                   |  |                        |
| <b>MFLA1401</b> | 4 E-2                                                                                                                             | 5.637                        | 5.276                     | 6.468                   | 0.377                  | Y ●●● Y                                       | 2.37 E-1 | 23.259                       | 23.336                    | 24.298                  | -0.012                 | Y ●●      |                   |  |                        |
|                 | <i>Chromosome segregation protein SMC [Methylobacillus flagellatus KT]637938309 YP_545510</i>                                     |                              |                           |                         |                        |                                               |          |                              |                           |                         |                        |           |                   |  |                        |
| <b>MFLA1402</b> | 6.09 E-2                                                                                                                          | 5.944                        | 5.929                     | 6.937                   | -0.031                 | Y ●●● Y                                       | 1.82 E-1 | 25.424                       | 25.729                    | 26.584                  | -0.585                 | Y ●●      |                   |  |                        |
|                 | <i>" putative ZipA related protein, possibly involved in cell division [Methylobacillus flagellatus KT]637938310 YP_545511 ""</i> |                              |                           |                         |                        |                                               |          |                              |                           |                         |                        |           |                   |  |                        |
| <b>MFLA1403</b> | 4.06 E-2                                                                                                                          | 5.532                        | 4.995                     | 6.289                   | 0.530                  | Y ●●● Y                                       | 7.02 E-2 | 24.521                       | 23.721                    | 25.176                  | 0.712                  | Y ●●      |                   |  |                        |
|                 | <i>" DNA ligase, NAD-dependent [Methylobacillus flagellatus KT]637938311 YP_545512 ""</i>                                         |                              |                           |                         |                        |                                               |          |                              |                           |                         |                        |           |                   |  |                        |
| <b>MFLA1404</b> |                                                                                                                                   | 2.710                        | 1.585                     | 3.255                   | 0.035                  | Y ●●● Y                                       | 7.72 E-2 | 20.259                       | 20.107                    | 21.185                  | -0.895                 | Y ●●      |                   |  |                        |
|                 | <i>" 3'(2'),5'-bisphosphate nucleotidase [Methylobacillus flagellatus KT]637938312 YP_545513 ""</i>                               |                              |                           |                         |                        |                                               |          |                              |                           |                         |                        |           |                   |  |                        |
| <b>MFLA1405</b> |                                                                                                                                   | 4.397                        | 3.584                     | 5.047                   | 0.786                  | Y ●●● Y                                       | 1.42 E-1 | 21.518                       | 22.128                    | 22.855                  | -1.026                 | Y ●●      |                   |  |                        |
|                 | <i>TPR repeat [Methylobacillus flagellatus KT]637938313 YP_545514</i>                                                             |                              |                           |                         |                        |                                               |          |                              |                           |                         |                        |           |                   |  |                        |
| <b>MFLA1406</b> |                                                                                                                                   | 3.199                        | 3.275                     | 4.237                   | -0.225                 | Y ●●● Y                                       | 2.52 E-2 | 24.232                       | 25.316                    | 25.873                  | -1.095                 | Y ●●      |                   |  |                        |
|                 | <i>Conserved TM helix [Methylobacillus flagellatus KT]637938314 YP_545515</i>                                                     |                              |                           |                         |                        |                                               |          |                              |                           |                         |                        |           |                   |  |                        |
| <b>MFLA1407</b> |                                                                                                                                   | 2.813                        |                           | 2.813                   |                        | Y ●●● Y                                       |          | 20.577                       |                           | 20.577                  |                        | Y ●●      |                   |  |                        |
|                 | <i>cold-shock DNA-binding domain protein [Methylobacillus flagellatus KT]637938315 YP_545516</i>                                  |                              |                           |                         |                        |                                               |          |                              |                           |                         |                        |           |                   |  |                        |
| <b>MFLA1408</b> | 1.8 E-2                                                                                                                           | 9.340                        | 9.231                     | 10.287                  | 0.110                  | Y ●●● Y                                       | 5.57 E-2 | 29.290                       | 29.684                    | 30.501                  | -0.414                 | Y ●●      |                   |  |                        |
|                 | <i>trigger factor [Methylobacillus flagellatus KT]637938316 YP_545517</i>                                                         |                              |                           |                         |                        |                                               |          |                              |                           |                         |                        |           |                   |  |                        |
| <b>MFLA1409</b> | 3.4 E-16                                                                                                                          | 7.713                        | 6.830                     | 8.338                   | 0.826                  | R ●●● Y                                       | 1.35 E-1 | 26.727                       | 26.550                    | 27.641                  | 0.158                  | R ●●      |                   |  |                        |
|                 | <i>" ATP-dependent Clp protease, proteolytic subunit ClpP [Methylobacillus flagellatus KT]637938317 YP_545518 ""</i>              |                              |                           |                         |                        |                                               |          |                              |                           |                         |                        |           |                   |  |                        |
| <b>MFLA1410</b> |                                                                                                                                   | 6.253                        | 6.868                     | 7.593                   | -0.497                 | Y ●●● Y                                       | 2.43 E-2 | 25.606                       | 26.990                    | 27.458                  | -1.347                 | Y ●●      |                   |  |                        |
|                 | <i>" ATP-dependent Clp protease, ATP-binding subunit ClpX [Methylobacillus flagellatus KT]637938318 YP_545519 ""</i>              |                              |                           |                         |                        |                                               |          |                              |                           |                         |                        |           |                   |  |                        |
| <b>MFLA1411</b> | 1.01 E-7                                                                                                                          | 9.235                        | 8.902                     | 10.078                  | 0.323                  | Y ●●● Y                                       | 1.29 E-2 | 28.683                       | 28.451                    | 29.572                  | 0.232                  | Y ●●      |                   |  |                        |
|                 | <i>ATP-dependent protease La [Methylobacillus flagellatus KT]637938319 YP_545520</i>                                              |                              |                           |                         |                        |                                               |          |                              |                           |                         |                        |           |                   |  |                        |
| <b>MFLA1412</b> |                                                                                                                                   | 6.366                        | 5.826                     | 7.121                   | 0.320                  | Y ●●● Y                                       | 2.7 E-1  | 27.420                       | 27.358                    | 28.389                  | -1.085                 | Y ●●      |                   |  |                        |
|                 | <i>histone-like DNA-binding protein [Methylobacillus flagellatus KT]637938320 YP_545521</i>                                       |                              |                           |                         |                        |                                               |          |                              |                           |                         |                        |           |                   |  |                        |
| <b>MFLA1413</b> | 0                                                                                                                                 | 9.162                        | 8.141                     | 9.740                   | 1.087                  | R ●●● Y                                       | 1.43 E-1 | 27.899                       | 27.780                    | 28.841                  | 0.119                  | R ●●      |                   |  |                        |
|                 | <i>PpiC-type peptidyl-prolyl cis-trans isomerase [Methylobacillus flagellatus KT]637938323 YP_545522</i>                          |                              |                           |                         |                        |                                               |          |                              |                           |                         |                        |           |                   |  |                        |
| <b>MFLA1414</b> |                                                                                                                                   | 0.000                        | 0.000                     |                         |                        | ●●●                                           |          | 0.000                        | 0.000                     |                         |                        | ●●        |                   |  |                        |
|                 | <i>hypothetical protein [Methylobacillus flagellatus KT]637938324 YP_545523</i>                                                   |                              |                           |                         |                        |                                               |          |                              |                           |                         |                        |           |                   |  |                        |
| <b>MFLA1415</b> |                                                                                                                                   | 0.000                        | 0.000                     |                         |                        | ●●●                                           |          | 0.000                        | 0.000                     |                         |                        | ●●        |                   |  |                        |
|                 | <i>hypothetical protein [Methylobacillus flagellatus KT]637938325 YP_545524</i>                                                   |                              |                           |                         |                        |                                               |          |                              |                           |                         |                        |           |                   |  |                        |
| <b>MFLA1416</b> |                                                                                                                                   | 0.000                        | 0.000                     |                         |                        | ●●●                                           |          | 0.000                        | 0.000                     |                         |                        | ●●        |                   |  |                        |
|                 | <i>Malto-oligosyltrehalose synthase [Methylobacillus flagellatus KT]637938326 YP_545525</i>                                       |                              |                           |                         |                        |                                               |          |                              |                           |                         |                        |           |                   |  |                        |
| <b>MFLA1417</b> |                                                                                                                                   | 0.000                        | 0.000                     |                         |                        | ●●●                                           |          | 0.000                        | 0.000                     |                         |                        | ●●        |                   |  |                        |
|                 | <i>Malto-oligosyltrehalose trehalohydrolase [Methylobacillus flagellatus KT]637938327 YP_545526</i>                               |                              |                           |                         |                        |                                               |          |                              |                           |                         |                        |           |                   |  |                        |
| <b>MFLA1418</b> |                                                                                                                                   | 0.000                        | 0.000                     |                         |                        | ●●●                                           |          | 0.000                        | 0.000                     |                         |                        | ●●        |                   |  |                        |
|                 | <i>Trehalose synthase-like protein [Methylobacillus flagellatus KT]637938328 YP_545527</i>                                        |                              |                           |                         |                        |                                               |          |                              |                           |                         |                        |           |                   |  |                        |
| <b>MFLA1419</b> |                                                                                                                                   | 0.000                        | 0.000                     |                         |                        | ●●●                                           |          | 0.000                        | 0.000                     |                         |                        | ●●        |                   |  |                        |
|                 | <i>" alpha amylase, catalytic region [Methylobacillus flagellatus KT]637938329 YP_545528 ""</i>                                   |                              |                           |                         |                        |                                               |          |                              |                           |                         |                        |           |                   |  |                        |
| <b>MFLA1420</b> |                                                                                                                                   | 0.000                        | 0.000                     |                         |                        | ●●●                                           |          | 0.000                        | 0.000                     |                         |                        | ●●        |                   |  |                        |
|                 | <i>hypothetical protein [Methylobacillus flagellatus KT]637938330 YP_545529</i>                                                   |                              |                           |                         |                        |                                               |          |                              |                           |                         |                        |           |                   |  |                        |

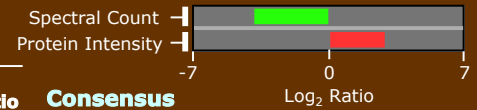

**AM/OH *M. Flagellatus* Spectral Count**

**AM/OH *M. Flagellatus* Protein Intensity**

| ORF             | Spectral Count                                                                                               |                              |                           |                         |                        | Protein Intensity |         |                              |                           |                         | Consensus | Log <sub>2</sub> Ratio |                        |
|-----------------|--------------------------------------------------------------------------------------------------------------|------------------------------|---------------------------|-------------------------|------------------------|-------------------|---------|------------------------------|---------------------------|-------------------------|-----------|------------------------|------------------------|
|                 | q-value                                                                                                      | log <sub>2</sub> Methylamine | log <sub>2</sub> Methanol | log <sub>2</sub> Sc Sum | log <sub>2</sub> Ratio | Regulation        | q-value | log <sub>2</sub> Methylamine | log <sub>2</sub> Methanol | log <sub>2</sub> PI Sum |           |                        | log <sub>2</sub> Ratio |
| <b>MFLA1421</b> |                                                                                                              | 0.000                        | 0.000                     |                         |                        | ■ ■               |         | 0.000                        | 0.000                     |                         |           | ■                      |                        |
|                 | <i>phospholipase D/Transphosphatidylase [Methylobacillus flagellatus KT]637938331 YP_545530</i>              |                              |                           |                         |                        |                   |         |                              |                           |                         |           |                        |                        |
| <b>MFLA1422</b> |                                                                                                              | 0.000                        | 0.000                     |                         |                        | ■ ■               |         | 0.000                        | 0.000                     |                         |           | ■                      |                        |
|                 | <i>Endonuclease/exonuclease/phosphatase [Methylobacillus flagellatus KT]637938332 YP_545531</i>              |                              |                           |                         |                        |                   |         |                              |                           |                         |           |                        |                        |
| <b>MFLA1423</b> |                                                                                                              | 0.000                        | 0.000                     |                         |                        | ■ ■               |         | 0.000                        | 0.000                     |                         |           | ■                      |                        |
|                 | <i>hypothetical protein [Methylobacillus flagellatus KT]637938333 YP_545532</i>                              |                              |                           |                         |                        |                   |         |                              |                           |                         |           |                        |                        |
| <b>MFLA1424</b> |                                                                                                              | 0.000                        | 0.000                     |                         |                        | ■ ■               |         | 0.000                        | 0.000                     |                         |           | ■                      |                        |
|                 | <i>hypothetical protein [Methylobacillus flagellatus KT]637938334 YP_545533</i>                              |                              |                           |                         |                        |                   |         |                              |                           |                         |           |                        |                        |
| <b>MFLA1425</b> |                                                                                                              | 0.000                        | 0.000                     |                         |                        | ■ ■               |         | 0.000                        | 0.000                     |                         |           | ■                      |                        |
|                 | <i>methyltransferase small [Methylobacillus flagellatus KT]637938335 YP_545534</i>                           |                              |                           |                         |                        |                   |         |                              |                           |                         |           |                        |                        |
| <b>MFLA1426</b> |                                                                                                              | 0.000                        | 0.000                     |                         |                        | ■ ■               |         | 0.000                        | 0.000                     |                         |           | ■                      |                        |
|                 | <i>short-chain dehydrogenase/reductase SDR [Methylobacillus flagellatus KT]637938336 YP_545535</i>           |                              |                           |                         |                        |                   |         |                              |                           |                         |           |                        |                        |
| <b>MFLA1427</b> |                                                                                                              | 0.000                        | 0.000                     |                         |                        | ■ ■               |         | 0.000                        | 0.000                     |                         |           | ■                      |                        |
|                 | <i>hypothetical protein [Methylobacillus flagellatus KT]637938337 YP_545536</i>                              |                              |                           |                         |                        |                   |         |                              |                           |                         |           |                        |                        |
| <b>MFLA1428</b> |                                                                                                              | 0.000                        | 0.000                     |                         |                        | ■ ■               |         | 0.000                        | 0.000                     |                         |           | ■                      |                        |
|                 | <i>hypothetical protein [Methylobacillus flagellatus KT]637938338 YP_545537</i>                              |                              |                           |                         |                        |                   |         |                              |                           |                         |           |                        |                        |
| <b>MFLA1429</b> |                                                                                                              | 0.000                        | 0.000                     |                         |                        | ■ ■               |         | 0.000                        | 0.000                     |                         |           | ■                      |                        |
|                 | <i>copper resistance protein CopC [Methylobacillus flagellatus KT]637938339 YP_545538</i>                    |                              |                           |                         |                        |                   |         |                              |                           |                         |           |                        |                        |
| <b>MFLA1430</b> |                                                                                                              | 0.000                        | 0.000                     |                         |                        | ■ ■               |         | 0.000                        | 0.000                     |                         |           | ■                      |                        |
|                 | <i>copper resistance D [Methylobacillus flagellatus KT]637938340 YP_545539</i>                               |                              |                           |                         |                        |                   |         |                              |                           |                         |           |                        |                        |
| <b>MFLA1431</b> |                                                                                                              | 0.000                        | 0.000                     |                         |                        | ■ ■               |         | 0.000                        | 0.000                     |                         |           | ■                      |                        |
|                 | <i>hypothetical protein [Methylobacillus flagellatus KT]637938341 YP_545540</i>                              |                              |                           |                         |                        |                   |         |                              |                           |                         |           |                        |                        |
| <b>MFLA1432</b> |                                                                                                              | 0.000                        | 0.000                     |                         |                        | ■ ■               |         | 0.000                        | 0.000                     |                         |           | ■                      |                        |
|                 | <i>" cytochrome c, class I [Methylobacillus flagellatus KT]637938342 YP_545541 ""</i>                        |                              |                           |                         |                        |                   |         |                              |                           |                         |           |                        |                        |
| <b>MFLA1433</b> |                                                                                                              | 0.000                        | 0.000                     |                         |                        | ■ ■               |         | 0.000                        | 0.000                     |                         |           | ■                      |                        |
|                 | <i>" cytochrome C oxidase, mono-heme subunit/FixO [Methylobacillus flagellatus KT]637938343 YP_545542 ""</i> |                              |                           |                         |                        |                   |         |                              |                           |                         |           |                        |                        |
| <b>MFLA1434</b> |                                                                                                              | 0.000                        | 0.000                     |                         |                        | ■ ■               |         | 0.000                        | 0.000                     |                         |           | ■                      |                        |
|                 | <i>" cytochrome c oxidase, subunit I [Methylobacillus flagellatus KT]637938344 YP_545543 ""</i>              |                              |                           |                         |                        |                   |         |                              |                           |                         |           |                        |                        |
| <b>MFLA1435</b> |                                                                                                              | 0.000                        | 0.000                     |                         |                        | ■ ■               |         | 0.000                        | 0.000                     |                         |           | ■                      |                        |
|                 | <i>hypothetical protein [Methylobacillus flagellatus KT]637938345 YP_545544</i>                              |                              |                           |                         |                        |                   |         |                              |                           |                         |           |                        |                        |
| <b>MFLA1436</b> |                                                                                                              | 0.000                        | 0.000                     |                         |                        | ■ ■               |         | 0.000                        | 0.000                     |                         |           | ■                      |                        |
|                 | <i>Catalase [Methylobacillus flagellatus KT]637938346 YP_545545</i>                                          |                              |                           |                         |                        |                   |         |                              |                           |                         |           |                        |                        |
| <b>MFLA1437</b> |                                                                                                              | 0.000                        | 0.000                     |                         |                        | ■ ■               |         | 0.000                        | 0.000                     |                         |           | ■                      |                        |
|                 | <i>integral membrane protein [Methylobacillus flagellatus KT]637938347 YP_545546</i>                         |                              |                           |                         |                        |                   |         |                              |                           |                         |           |                        |                        |
| <b>MFLA1438</b> |                                                                                                              | 0.000                        | 0.000                     |                         |                        | ■ ■               |         | 0.000                        | 0.000                     |                         |           | ■                      |                        |
|                 | <i>NAD-dependent epimerase/dehydratase [Methylobacillus flagellatus KT]637938348 YP_545547</i>               |                              |                           |                         |                        |                   |         |                              |                           |                         |           |                        |                        |
| <b>MFLA1439</b> |                                                                                                              | 0.000                        | 0.000                     |                         |                        | ■ ■               |         | 0.000                        | 0.000                     |                         |           | ■                      |                        |
|                 | <i>hypothetical protein [Methylobacillus flagellatus KT]637938349 YP_545548</i>                              |                              |                           |                         |                        |                   |         |                              |                           |                         |           |                        |                        |
| <b>MFLA1440</b> |                                                                                                              | 0.000                        | 0.000                     |                         |                        | ■ ■               |         | 0.000                        | 0.000                     |                         |           | ■                      |                        |
|                 | <i>hypothetical protein [Methylobacillus flagellatus KT]637938350 YP_545549</i>                              |                              |                           |                         |                        |                   |         |                              |                           |                         |           |                        |                        |
| <b>MFLA1441</b> |                                                                                                              | 0.000                        | 0.000                     |                         |                        | ■ ■               |         | 0.000                        | 0.000                     |                         |           | ■                      |                        |
|                 | <i>Alcohol dehydrogenase GroES-like protein [Methylobacillus flagellatus KT]637938351 YP_545550</i>          |                              |                           |                         |                        |                   |         |                              |                           |                         |           |                        |                        |
| <b>MFLA1442</b> |                                                                                                              | 0.000                        | 0.000                     |                         |                        | ■ ■               |         | 0.000                        | 0.000                     |                         |           | ■                      |                        |
|                 | <i>fatty acid beta hydroxylase (cytochrome P450) [Methylobacillus flagellatus KT]637938352 YP_545551</i>     |                              |                           |                         |                        |                   |         |                              |                           |                         |           |                        |                        |

| ORF             | AM/OH <i>M. Flagellatus</i> Spectral Count                                                          |                      |                   |                 |                |            | AM/OH <i>M. Flagellatus</i> Protein Intensity |                      |                   |                 |                |                        | Consensus | Spectral Count |   | Protein Intensity |  |
|-----------------|-----------------------------------------------------------------------------------------------------|----------------------|-------------------|-----------------|----------------|------------|-----------------------------------------------|----------------------|-------------------|-----------------|----------------|------------------------|-----------|----------------|---|-------------------|--|
|                 | $q$ -value                                                                                          | $\log_2$ Methylamine | $\log_2$ Methanol | $\log_2$ Sc Sum | $\log_2$ Ratio | Regulation | $q$ -value                                    | $\log_2$ Methylamine | $\log_2$ Methanol | $\log_2$ PI Sum | $\log_2$ Ratio | Log <sub>2</sub> Ratio |           | -7             | 0 | 7                 |  |
| <b>MFLA1443</b> |                                                                                                     | 0.000                | 0.000             |                 |                |            |                                               | 0.000                | 0.000             |                 |                |                        |           |                |   |                   |  |
|                 | <i>hypothetical protein [Methylobacillus flagellatus KT]637938353 YP_545552</i>                     |                      |                   |                 |                |            |                                               |                      |                   |                 |                |                        |           |                |   |                   |  |
| <b>MFLA1444</b> |                                                                                                     |                      | 1.807             | 1.807           |                | Y ●● Y     |                                               |                      | 17.018            | 17.018          |                |                        | Y ●       |                |   |                   |  |
|                 | <i>protein of unknown function DUF336 [Methylobacillus flagellatus KT]637938354 YP_545553</i>       |                      |                   |                 |                |            |                                               |                      |                   |                 |                |                        |           |                |   |                   |  |
| <b>MFLA1445</b> |                                                                                                     | 0.000                | 0.000             |                 |                |            |                                               | 0.000                | 0.000             |                 |                |                        |           |                |   |                   |  |
|                 | <i>hypothetical protein [Methylobacillus flagellatus KT]637938355 YP_545554</i>                     |                      |                   |                 |                |            |                                               |                      |                   |                 |                |                        |           |                |   |                   |  |
| <b>MFLA1446</b> |                                                                                                     | 0.000                | 0.000             |                 |                |            |                                               | 0.000                | 0.000             |                 |                |                        |           |                |   |                   |  |
|                 | <i>hypothetical protein [Methylobacillus flagellatus KT]637938356 YP_545555</i>                     |                      |                   |                 |                |            |                                               |                      |                   |                 |                |                        |           |                |   |                   |  |
| <b>MFLA1447</b> |                                                                                                     | 0.000                | 0.000             |                 |                |            |                                               | 0.000                | 0.000             |                 |                |                        |           |                |   |                   |  |
|                 | <i>"cytochrome c oxidase, subunit III [Methylobacillus flagellatus KT]637938357 YP_545556 ""</i>    |                      |                   |                 |                |            |                                               |                      |                   |                 |                |                        |           |                |   |                   |  |
| <b>MFLA1448</b> |                                                                                                     | 0.000                | 0.000             |                 |                |            |                                               | 0.000                | 0.000             |                 |                |                        |           |                |   |                   |  |
|                 | <i>Cytochrome-c oxidase [Methylobacillus flagellatus KT]637938358 YP_545557</i>                     |                      |                   |                 |                |            |                                               |                      |                   |                 |                |                        |           |                |   |                   |  |
| <b>MFLA1449</b> |                                                                                                     | 0.000                | 0.000             |                 |                |            |                                               | 0.000                | 0.000             |                 |                |                        |           |                |   |                   |  |
|                 | <i>"cytochrome c oxidase, subunit II [Methylobacillus flagellatus KT]637938359 YP_545558 ""</i>     |                      |                   |                 |                |            |                                               |                      |                   |                 |                |                        |           |                |   |                   |  |
| <b>MFLA1450</b> |                                                                                                     | 0.000                | 0.000             |                 |                |            |                                               | 0.000                | 0.000             |                 |                |                        |           |                |   |                   |  |
|                 | <i>"cytochrome c, class I [Methylobacillus flagellatus KT]637938360 YP_545559 ""</i>                |                      |                   |                 |                |            |                                               |                      |                   |                 |                |                        |           |                |   |                   |  |
| <b>MFLA1451</b> |                                                                                                     | 0.000                | 0.000             |                 |                |            |                                               | 0.000                | 0.000             |                 |                |                        |           |                |   |                   |  |
|                 | <i>Pyrrolo-quinoline quinone [Methylobacillus flagellatus KT]637938361 YP_545560</i>                |                      |                   |                 |                |            |                                               |                      |                   |                 |                |                        |           |                |   |                   |  |
| <b>MFLA1452</b> |                                                                                                     | 0.000                | 0.000             |                 |                |            |                                               | 0.000                | 0.000             |                 |                |                        |           |                |   |                   |  |
|                 | <i>MscS Mechanosensitive ion channel [Methylobacillus flagellatus KT]637938362 YP_545561</i>        |                      |                   |                 |                |            |                                               |                      |                   |                 |                |                        |           |                |   |                   |  |
| <b>MFLA1453</b> |                                                                                                     | 0.000                | 0.000             |                 |                |            |                                               | 0.000                | 0.000             |                 |                |                        |           |                |   |                   |  |
|                 | <i>hypothetical protein [Methylobacillus flagellatus KT]637938363 YP_545562</i>                     |                      |                   |                 |                |            |                                               |                      |                   |                 |                |                        |           |                |   |                   |  |
| <b>MFLA1454</b> | 1.06 E-1                                                                                            | 5.093                | 5.018             | 6.056           | 0.053          | Y ●● Y     |                                               | 1.82 E-1             | 24.326            | 23.935          | 25.144         | 0.085                  | Y ●       |                |   |                   |  |
|                 | <i>hypothetical protein [Methylobacillus flagellatus KT]637938364 YP_545563</i>                     |                      |                   |                 |                |            |                                               |                      |                   |                 |                |                        |           |                |   |                   |  |
| <b>MFLA1455</b> | 1.72 E-4                                                                                            | 4.386                | 5.510             | 6.055           | -1.127         | G ●● Y     |                                               | 1.33 E-1             | 24.763            | 25.123          | 25.954         | -0.423                 | G ●       |                |   |                   |  |
|                 | <i>hypothetical protein [Methylobacillus flagellatus KT]637938365 YP_545564</i>                     |                      |                   |                 |                |            |                                               |                      |                   |                 |                |                        |           |                |   |                   |  |
| <b>MFLA1456</b> |                                                                                                     | 0.000                | 0.000             |                 |                |            |                                               | 0.000                | 0.000             |                 |                |                        |           |                |   |                   |  |
|                 | <i>hypothetical protein [Methylobacillus flagellatus KT]637938366 YP_545565</i>                     |                      |                   |                 |                |            |                                               |                      |                   |                 |                |                        |           |                |   |                   |  |
| <b>MFLA1457</b> |                                                                                                     | 0.000                | 0.000             |                 |                |            |                                               | 0.000                | 0.000             |                 |                |                        |           |                |   |                   |  |
|                 | <i>type II and III secretion system protein [Methylobacillus flagellatus KT]637938367 YP_545566</i> |                      |                   |                 |                |            |                                               |                      |                   |                 |                |                        |           |                |   |                   |  |
| <b>MFLA1458</b> |                                                                                                     | 0.000                | 0.000             |                 |                |            |                                               | 0.000                | 0.000             |                 |                |                        |           |                |   |                   |  |
|                 | <i>hypothetical protein [Methylobacillus flagellatus KT]637938368 YP_545567</i>                     |                      |                   |                 |                |            |                                               |                      |                   |                 |                |                        |           |                |   |                   |  |
| <b>MFLA1459</b> |                                                                                                     | 0.000                | 0.000             |                 |                |            |                                               | 0.000                | 0.000             |                 |                |                        |           |                |   |                   |  |
|                 | <i>hypothetical protein [Methylobacillus flagellatus KT]637938369 YP_545568</i>                     |                      |                   |                 |                |            |                                               |                      |                   |                 |                |                        |           |                |   |                   |  |
| <b>MFLA1460</b> |                                                                                                     | 0.000                | 0.000             |                 |                |            |                                               | 0.000                | 0.000             |                 |                |                        |           |                |   |                   |  |
|                 | <i>hypothetical protein [Methylobacillus flagellatus KT]637938370 YP_545569</i>                     |                      |                   |                 |                |            |                                               |                      |                   |                 |                |                        |           |                |   |                   |  |
| <b>MFLA1461</b> |                                                                                                     | 0.000                | 0.000             |                 |                |            |                                               | 0.000                | 0.000             |                 |                |                        |           |                |   |                   |  |
|                 | <i>hypothetical protein [Methylobacillus flagellatus KT]637938371 YP_545570</i>                     |                      |                   |                 |                |            |                                               |                      |                   |                 |                |                        |           |                |   |                   |  |
| <b>MFLA1462</b> |                                                                                                     | 0.000                | 0.000             |                 |                |            |                                               | 0.000                | 0.000             |                 |                |                        |           |                |   |                   |  |
|                 | <i>hypothetical protein [Methylobacillus flagellatus KT]637938372 YP_545571</i>                     |                      |                   |                 |                |            |                                               |                      |                   |                 |                |                        |           |                |   |                   |  |
| <b>MFLA1463</b> |                                                                                                     | 0.000                | 0.000             |                 |                |            |                                               | 0.000                | 0.000             |                 |                |                        |           |                |   |                   |  |
|                 | <i>hypothetical protein [Methylobacillus flagellatus KT]637938373 YP_545572</i>                     |                      |                   |                 |                |            |                                               |                      |                   |                 |                |                        |           |                |   |                   |  |
| <b>MFLA1464</b> |                                                                                                     | 1.521                | 1.000             | 2.284           | 0.521          | Y ●● Y     |                                               | 20.592               | 20.191            | 21.405          | 0.401          | Y ●                    |           |                |   |                   |  |
|                 | <i>hypothetical protein [Methylobacillus flagellatus KT]637938374 YP_545573</i>                     |                      |                   |                 |                |            |                                               |                      |                   |                 |                |                        |           |                |   |                   |  |

| ORF             | AM/OH <i>M. Flagellatus</i> Spectral Count                                                                                      |                              |                           |                         |                        |            | AM/OH <i>M. Flagellatus</i> Protein Intensity |                              |                           |                         |                        |      | Consensus | Log <sub>2</sub> Ratio |
|-----------------|---------------------------------------------------------------------------------------------------------------------------------|------------------------------|---------------------------|-------------------------|------------------------|------------|-----------------------------------------------|------------------------------|---------------------------|-------------------------|------------------------|------|-----------|------------------------|
|                 | <i>q</i> -value                                                                                                                 | log <sub>2</sub> Methylamine | log <sub>2</sub> Methanol | log <sub>2</sub> Sc Sum | log <sub>2</sub> Ratio | Regulation | <i>q</i> -value                               | log <sub>2</sub> Methylamine | log <sub>2</sub> Methanol | log <sub>2</sub> PI Sum | log <sub>2</sub> Ratio |      |           |                        |
| <b>MFLA1465</b> |                                                                                                                                 | 0.813                        |                           | 0.813                   |                        | Y ●● Y     |                                               | 20.420                       |                           | 20.420                  |                        | Y ●● |           |                        |
|                 | <i>hypothetical protein [Methylobacillus flagellatus KT]637938375 YP_545574</i>                                                 |                              |                           |                         |                        |            |                                               |                              |                           |                         |                        |      |           |                        |
| <b>MFLA1466</b> | 4.467                                                                                                                           | 4.543                        | 5.505                     | -0.167                  | Y ●● Y                 | 6.47 E-2   | 24.465                                        | 25.137                       | 25.840                    | -0.826                  | Y ●●                   |      |           |                        |
|                 | <i>Peptide deformylase [Methylobacillus flagellatus KT]637938377 YP_545575</i>                                                  |                              |                           |                         |                        |            |                                               |                              |                           |                         |                        |      |           |                        |
| <b>MFLA1467</b> | 4.964                                                                                                                           | 4.641                        | 5.811                     | 0.316                   | Y ●● Y                 | 1.44 E-1   | 24.855                                        | 25.140                       | 26.004                    | -0.373                  | Y ●●                   |      |           |                        |
|                 | <i>5'-methylthioadenosine phosphorylase [Methylobacillus flagellatus KT]637938378 YP_545576</i>                                 |                              |                           |                         |                        |            |                                               |                              |                           |                         |                        |      |           |                        |
| <b>MFLA1468</b> | 4.357                                                                                                                           | 3.991                        | 5.186                     | 0.251                   | Y ●● Y                 | 8 E-2      | 22.264                                        | 23.002                       | 23.679                    | -1.053                  | Y ●●                   |      |           |                        |
|                 | <i>Squalene/phytoene synthase [Methylobacillus flagellatus KT]637938379 YP_545577</i>                                           |                              |                           |                         |                        |            |                                               |                              |                           |                         |                        |      |           |                        |
| <b>MFLA1469</b> | 2.795                                                                                                                           | 3.240                        | 4.035                     | -0.486                  | Y ●● Y                 | 1.02 E-1   | 21.390                                        | 22.619                       | 23.132                    | -0.880                  | Y ●●                   |      |           |                        |
|                 | <i>Squalene/phytoene synthase [Methylobacillus flagellatus KT]637938380 YP_545578</i>                                           |                              |                           |                         |                        |            |                                               |                              |                           |                         |                        |      |           |                        |
| <b>MFLA1470</b> | 0.521                                                                                                                           |                              | 0.521                     |                         | Y ●● Y                 |            | 18.602                                        |                              | 18.602                    |                         | Y ●●                   |      |           |                        |
|                 | <i>amine oxidase [Methylobacillus flagellatus KT]637938381 YP_545579</i>                                                        |                              |                           |                         |                        |            |                                               |                              |                           |                         |                        |      |           |                        |
| <b>MFLA1471</b> | 0.000                                                                                                                           | 0.000                        |                           |                         | ●●                     |            | 0.000                                         | 0.000                        |                           |                         | ●●                     |      |           |                        |
|                 | <i>membrane protein of unknown function [Methylobacillus flagellatus KT]637938382 YP_545580</i>                                 |                              |                           |                         |                        |            |                                               |                              |                           |                         |                        |      |           |                        |
| <b>MFLA1472</b> | 1.82 E-2                                                                                                                        | 4.926                        | 5.541                     | 6.266                   | -0.618                 | Y ●● Y     | 4.68 E-2                                      | 23.349                       | 24.204                    | 24.839                  | -0.949                 | Y ●● |           |                        |
|                 | <i>" Glycogen/starch synthases, ADP-glucose type [Methylobacillus flagellatus KT]637938383 YP_545581 ""</i>                     |                              |                           |                         |                        |            |                                               |                              |                           |                         |                        |      |           |                        |
| <b>MFLA1473</b> | 1.07 E-1                                                                                                                        | 5.976                        | 5.727                     | 6.857                   | 0.246                  | Y ●● Y     | 1.65 E-1                                      | 25.274                       | 25.090                    | 26.185                  | 0.180                  | Y ●● |           |                        |
|                 | <i>Exonuclease [Methylobacillus flagellatus KT]637938384 YP_545582</i>                                                          |                              |                           |                         |                        |            |                                               |                              |                           |                         |                        |      |           |                        |
| <b>MFLA1474</b> | 4.277                                                                                                                           | 4.825                        | 5.577                     | -0.571                  | Y ●● Y                 | 4.5 E-2    | 22.678                                        | 24.519                       | 24.875                    | -2.383                  | Y ●●                   |      |           |                        |
|                 | <i>Ste24 endopeptidase [Methylobacillus flagellatus KT]637938385 YP_545583</i>                                                  |                              |                           |                         |                        |            |                                               |                              |                           |                         |                        |      |           |                        |
| <b>MFLA1475</b> | 3.582                                                                                                                           | 3.725                        | 4.655                     | -0.752                  | Y ●● Y                 | 2.01 E-2   | 22.139                                        | 23.287                       | 23.825                    | -1.272                  | Y ●●                   |      |           |                        |
|                 | <i>GTPase EngC [Methylobacillus flagellatus KT]637938386 YP_545584</i>                                                          |                              |                           |                         |                        |            |                                               |                              |                           |                         |                        |      |           |                        |
| <b>MFLA1476</b> | 0.000                                                                                                                           | 0.000                        |                           |                         | ●●                     |            | 0.000                                         | 0.000                        |                           |                         | ●●                     |      |           |                        |
|                 | <i>histone deacetylase superfamily [Methylobacillus flagellatus KT]637938387 YP_545585</i>                                      |                              |                           |                         |                        |            |                                               |                              |                           |                         |                        |      |           |                        |
| <b>MFLA1477</b> |                                                                                                                                 | 3.039                        | 3.039                     |                         | Y ●● Y                 |            |                                               | 21.812                       | 21.812                    |                         | Y ●●                   |      |           |                        |
|                 | <i>6-pyruvoyl tetrahydrobiopterin synthase [Methylobacillus flagellatus KT]637938388 YP_545586</i>                              |                              |                           |                         |                        |            |                                               |                              |                           |                         |                        |      |           |                        |
| <b>MFLA1478</b> | 3.691                                                                                                                           | 3.000                        | 4.386                     | 0.691                   | Y ●● Y                 |            | 21.809                                        | 19.706                       | 22.111                    | 2.103                   | Y ●●                   |      |           |                        |
|                 | <i>" DNA polymerase III, epsilon subunit [Methylobacillus flagellatus KT]637938389 YP_545587 ""</i>                             |                              |                           |                         |                        |            |                                               |                              |                           |                         |                        |      |           |                        |
| <b>MFLA1479</b> | 1.967                                                                                                                           | 1.966                        | 2.966                     | -0.006                  | Y ●● Y                 | 1.05 E-1   | 20.331                                        | 21.218                       | 21.842                    | -1.358                  | Y ●●                   |      |           |                        |
|                 | <i>ribonuclease H [Methylobacillus flagellatus KT]637938390 YP_545588</i>                                                       |                              |                           |                         |                        |            |                                               |                              |                           |                         |                        |      |           |                        |
| <b>MFLA1480</b> | 3.899                                                                                                                           | 4.027                        | 4.965                     | -0.050                  | Y ●● Y                 | 7.62 E-2   | 22.019                                        | 22.511                       | 23.286                    | -0.586                  | Y ●●                   |      |           |                        |
|                 | <i>Methyltransferase type 11 [Methylobacillus flagellatus KT]637938391 YP_545589</i>                                            |                              |                           |                         |                        |            |                                               |                              |                           |                         |                        |      |           |                        |
| <b>MFLA1481</b> | 3.930                                                                                                                           | 3.551                        | 4.753                     | 0.362                   | Y ●● Y                 | 6.49 E-2   | 22.371                                        | 22.753                       | 23.575                    | -0.365                  | Y ●●                   |      |           |                        |
|                 | <i>Hydroxyacylglutathione hydrolase [Methylobacillus flagellatus KT]637938392 YP_545590</i>                                     |                              |                           |                         |                        |            |                                               |                              |                           |                         |                        |      |           |                        |
| <b>MFLA1482</b> | 0.000                                                                                                                           | 0.000                        |                           |                         | ●●                     |            | 0.000                                         | 0.000                        |                           |                         | ●●                     |      |           |                        |
|                 | <i>" Lytic transglycosylase, catalytic [Methylobacillus flagellatus KT]637938393 YP_545591 ""</i>                               |                              |                           |                         |                        |            |                                               |                              |                           |                         |                        |      |           |                        |
| <b>MFLA1483</b> | 5.014                                                                                                                           | 4.581                        | 5.814                     | 0.434                   | Y ●● Y                 | 2.21 E-1   | 23.797                                        | 23.871                       | 24.834                    | -0.110                  | Y ●●                   |      |           |                        |
|                 | <i>" extracellular solute-binding protein, family 5 [Methylobacillus flagellatus KT]637938394 YP_545592 ""</i>                  |                              |                           |                         |                        |            |                                               |                              |                           |                         |                        |      |           |                        |
| <b>MFLA1484</b> | 0.521                                                                                                                           |                              | 0.521                     |                         | Y ●● Y                 |            | 19.024                                        |                              | 19.024                    |                         | Y ●●                   |      |           |                        |
|                 | <i>binding-protein-dependent transport systems inner membrane component [Methylobacillus flagellatus KT]637938395 YP_545593</i> |                              |                           |                         |                        |            |                                               |                              |                           |                         |                        |      |           |                        |
| <b>MFLA1485</b> | 0.000                                                                                                                           | 0.000                        |                           |                         | ●●                     |            | 0.000                                         | 0.000                        |                           |                         | ●●                     |      |           |                        |
|                 | <i>binding-protein-dependent transport systems inner membrane component [Methylobacillus flagellatus KT]637938396 YP_545594</i> |                              |                           |                         |                        |            |                                               |                              |                           |                         |                        |      |           |                        |
| <b>MFLA1486</b> | 6.771                                                                                                                           | 5.802                        | 7.366                     | 0.816                   | Y ●● Y                 | 3.09 E-2   | 27.226                                        | 26.464                       | 27.894                    | 0.779                   | Y ●●                   |      |           |                        |
|                 | <i>hypothetical protein [Methylobacillus flagellatus KT]637938397 YP_545595</i>                                                 |                              |                           |                         |                        |            |                                               |                              |                           |                         |                        |      |           |                        |



| ORF             | AM/OH <i>M. Flagellatus</i> Spectral Count                                                                         |                              |                           |                         |                        |            | AM/OH <i>M. Flagellatus</i> Protein Intensity |                              |                           |                         |                        |           | Spectral Count         |   | Protein Intensity |  |
|-----------------|--------------------------------------------------------------------------------------------------------------------|------------------------------|---------------------------|-------------------------|------------------------|------------|-----------------------------------------------|------------------------------|---------------------------|-------------------------|------------------------|-----------|------------------------|---|-------------------|--|
|                 | q-value                                                                                                            | log <sub>2</sub> Methylamine | log <sub>2</sub> Methanol | log <sub>2</sub> Sc Sum | log <sub>2</sub> Ratio | Regulation | q-value                                       | log <sub>2</sub> Methylamine | log <sub>2</sub> Methanol | log <sub>2</sub> PI Sum | log <sub>2</sub> Ratio | Consensus | Log <sub>2</sub> Ratio |   |                   |  |
| <b>MFLA1487</b> |                                                                                                                    | 0.000                        | 0.000                     |                         |                        |            |                                               | 0.000                        | 0.000                     |                         |                        |           |                        |   |                   |  |
|                 | <i>putative hydrolase protein [Methylobacillus flagellatus KT]637938398 YP_545596</i>                              |                              |                           |                         |                        |            |                                               |                              |                           |                         |                        |           |                        |   |                   |  |
| <b>MFLA1488</b> |                                                                                                                    | 0.000                        | 0.000                     |                         |                        |            |                                               | 0.000                        | 0.000                     |                         |                        |           |                        |   |                   |  |
|                 | <i>hypothetical protein [Methylobacillus flagellatus KT]637938399 YP_545597</i>                                    |                              |                           |                         |                        |            |                                               |                              |                           |                         |                        |           |                        |   |                   |  |
| <b>MFLA1489</b> |                                                                                                                    | 0.000                        | 0.000                     |                         |                        |            |                                               | 0.000                        | 0.000                     |                         |                        |           |                        |   |                   |  |
|                 | <i>Arsenical pump membrane protein [Methylobacillus flagellatus KT]637938400 YP_545598</i>                         |                              |                           |                         |                        |            |                                               |                              |                           |                         |                        |           |                        |   |                   |  |
| <b>MFLA1490</b> |                                                                                                                    | 0.000                        | 0.000                     |                         |                        |            |                                               | 0.000                        | 0.000                     |                         |                        |           |                        |   |                   |  |
|                 | <i>putative signal transduction protein with CBS domains [Methylobacillus flagellatus KT]637938401 YP_545599</i>   |                              |                           |                         |                        |            |                                               |                              |                           |                         |                        |           |                        |   |                   |  |
| <b>MFLA1491</b> | 3.85 E-3                                                                                                           | 5.479                        | 6.049                     | 6.792                   | -0.620                 | G          | ●●                                            | Y                            | 2.74 E-2                  | 23.707                  | 24.552                 | 25.190    | -0.882                 | G | ●                 |  |
|                 | <i>arsenite-activated ATPase (arsA) [Methylobacillus flagellatus KT]637938402 YP_545600</i>                        |                              |                           |                         |                        |            |                                               |                              |                           |                         |                        |           |                        |   |                   |  |
| <b>MFLA1492</b> |                                                                                                                    | 1.106                        | 3.102                     | 3.425                   | -0.971                 | Y          | ●●                                            | Y                            | 1.02 E-1                  | 21.623                  | 23.806                 | 24.093    | -1.122                 | Y | ●                 |  |
|                 | <i>Arsenical resistance operon trans-acting repressor ArsD [Methylobacillus flagellatus KT]637938403 YP_545601</i> |                              |                           |                         |                        |            |                                               |                              |                           |                         |                        |           |                        |   |                   |  |
| <b>MFLA1493</b> |                                                                                                                    | 2.328                        | 3.546                     | 4.062                   | -0.050                 | Y          | ●●                                            | Y                            | 1.48 E-1                  | 21.016                  | 21.643                 | 22.363    | 0.445                  | Y | ●                 |  |
|                 | <i>" transcriptional regulator, ArsR family [Methylobacillus flagellatus KT]637938404 YP_545602 ""</i>             |                              |                           |                         |                        |            |                                               |                              |                           |                         |                        |           |                        |   |                   |  |
| <b>MFLA1494</b> |                                                                                                                    | 0.000                        | 0.000                     |                         |                        |            |                                               | 0.000                        | 0.000                     |                         |                        |           |                        |   |                   |  |
|                 | <i>Resolvase-like protein [Methylobacillus flagellatus KT]637938405 YP_545603</i>                                  |                              |                           |                         |                        |            |                                               |                              |                           |                         |                        |           |                        |   |                   |  |
| <b>MFLA1495</b> |                                                                                                                    | 1.843                        | 0.931                     | 2.458                   | 0.911                  | Y          | ●●                                            | Y                            | 19.103                    | 18.536                  | 19.848                 | 0.567     | Y                      | ● |                   |  |
|                 | <i>transposase Tn3 [Methylobacillus flagellatus KT]637938406 YP_545604</i>                                         |                              |                           |                         |                        |            |                                               |                              |                           |                         |                        |           |                        |   |                   |  |
| <b>MFLA1496</b> |                                                                                                                    | 0.000                        | 0.000                     |                         |                        |            |                                               | 0.000                        | 0.000                     |                         |                        |           |                        |   |                   |  |
|                 | <i>putative hydrolase protein [Methylobacillus flagellatus KT]637938407 YP_545605</i>                              |                              |                           |                         |                        |            |                                               |                              |                           |                         |                        |           |                        |   |                   |  |
| <b>MFLA1497</b> |                                                                                                                    | 4.601                        | 4.456                     | 5.530                   | 0.107                  | Y          | ●●                                            | Y                            | 1.13 E-1                  | 23.733                  | 23.994                 | 24.869    | -0.308                 | Y | ●                 |  |
|                 | <i>TatD-related deoxyribonuclease [Methylobacillus flagellatus KT]637938408 YP_545606</i>                          |                              |                           |                         |                        |            |                                               |                              |                           |                         |                        |           |                        |   |                   |  |
| <b>MFLA1498</b> |                                                                                                                    | 0.000                        | 0.000                     |                         |                        |            |                                               | 0.000                        | 0.000                     |                         |                        |           |                        |   |                   |  |
|                 | <i>type IV pilus assembly PilZ [Methylobacillus flagellatus KT]637938409 YP_545607</i>                             |                              |                           |                         |                        |            |                                               |                              |                           |                         |                        |           |                        |   |                   |  |
| <b>MFLA1499</b> |                                                                                                                    | 3.106                        | 2.585                     | 3.869                   | 0.521                  | Y          | ●●                                            | Y                            | 21.901                    | 21.170                  | 22.581                 | 0.731     | Y                      | ● |                   |  |
|                 | <i>" DNA polymerase III, delta prime subunit [Methylobacillus flagellatus KT]637938410 YP_545608 ""</i>            |                              |                           |                         |                        |            |                                               |                              |                           |                         |                        |           |                        |   |                   |  |
| <b>MFLA1500</b> |                                                                                                                    | 3.700                        | 3.638                     | 4.670                   | 0.044                  | Y          | ●●                                            | Y                            | 2.7 E-1                   | 21.355                  | 21.312                 | 22.334    | -0.181                 | Y | ●                 |  |
|                 | <i>Thymidylate kinase [Methylobacillus flagellatus KT]637938411 YP_545609</i>                                      |                              |                           |                         |                        |            |                                               |                              |                           |                         |                        |           |                        |   |                   |  |
| <b>MFLA1501</b> |                                                                                                                    | 4.967                        | 3.778                     | 5.492                   | 1.201                  | Y          | ●●                                            | Y                            | 7.36 E-2                  | 23.642                  | 22.844                 | 24.297    | 0.770                  | Y | ●                 |  |
|                 | <i>aminodeoxychorismate lyase [Methylobacillus flagellatus KT]637938412 YP_545610</i>                              |                              |                           |                         |                        |            |                                               |                              |                           |                         |                        |           |                        |   |                   |  |
| <b>MFLA1502</b> |                                                                                                                    | 0.000                        | 0.000                     |                         |                        |            |                                               | 0.000                        | 0.000                     |                         |                        |           |                        |   |                   |  |
|                 | <i>" aminotransferase, class IV [Methylobacillus flagellatus KT]637938413 YP_545611 ""</i>                         |                              |                           |                         |                        |            |                                               |                              |                           |                         |                        |           |                        |   |                   |  |
| <b>MFLA1503</b> |                                                                                                                    | 8.071                        | 7.901                     | 8.989                   | 0.175                  | Y          | ●●                                            | G                            | 5.49 E-3                  | 27.282                  | 27.822                 | 28.577    | -0.541                 | Y | ●                 |  |
|                 | <i>beta-ketoacyl synthase [Methylobacillus flagellatus KT]637938414 YP_545612</i>                                  |                              |                           |                         |                        |            |                                               |                              |                           |                         |                        |           |                        |   |                   |  |
| <b>MFLA1504</b> |                                                                                                                    | 6.650                        | 6.070                     | 7.389                   | 0.345                  | Y          | ●●                                            | Y                            | 1.99 E-2                  | 26.728                  | 28.806                 | 29.113    | -2.260                 | Y | ●                 |  |
|                 | <i>acyl carrier protein [Methylobacillus flagellatus KT]637938415 YP_545613</i>                                    |                              |                           |                         |                        |            |                                               |                              |                           |                         |                        |           |                        |   |                   |  |
| <b>MFLA1505</b> | 1.48 E-1                                                                                                           | 6.439                        | 6.405                     | 7.422                   | 0.030                  | Y          | ●●                                            | Y                            | 9.8 E-2                   | 26.666                  | 26.232                 | 27.465    | 0.397                  | Y | ●                 |  |
|                 | <i>3-oxoacyl-(acyl-carrier-protein) reductase [Methylobacillus flagellatus KT]637938416 YP_545614</i>              |                              |                           |                         |                        |            |                                               |                              |                           |                         |                        |           |                        |   |                   |  |
| <b>MFLA1506</b> | 1.05 E-2                                                                                                           | 6.180                        | 6.629                     | 7.422                   | -0.460                 | Y          | ●●                                            | Y                            | 1.23 E-2                  | 24.979                  | 25.657                 | 26.357    | -0.686                 | Y | ●                 |  |
|                 | <i>malonyl CoA-acyl carrier protein transacylase [Methylobacillus flagellatus KT]637938417 YP_545615</i>           |                              |                           |                         |                        |            |                                               |                              |                           |                         |                        |           |                        |   |                   |  |
| <b>MFLA1507</b> | 3 E-6                                                                                                              | 6.115                        | 5.151                     | 6.712                   | 0.864                  | R          | ●●                                            | Y                            | 3.18 E-2                  | 24.427                  | 23.740                 | 25.124    | 0.706                  | R | ●                 |  |
|                 | <i>3-oxoacyl-(acyl-carrier-protein) synthase III [Methylobacillus flagellatus KT]637938418 YP_545616</i>           |                              |                           |                         |                        |            |                                               |                              |                           |                         |                        |           |                        |   |                   |  |
| <b>MFLA1508</b> |                                                                                                                    | 2.996                        | 2.966                     | 3.981                   | 0.023                  | Y          | ●●                                            | Y                            | 1.5 E-1                   | 22.231                  | 21.919                 | 23.084    | 0.230                  | Y | ●                 |  |
|                 | <i>fatty acid/phospholipid synthesis protein PlsX [Methylobacillus flagellatus KT]637938419 YP_545617</i>          |                              |                           |                         |                        |            |                                               |                              |                           |                         |                        |           |                        |   |                   |  |

| ORF             | AM/OH <i>M. Flagellatus</i> Spectral Count                                                                                         |                              |                           |                         |                        | AM/OH <i>M. Flagellatus</i> Protein Intensity |          |                              |                           |                         | Spectral Count         |           | Protein Intensity      |  |  |
|-----------------|------------------------------------------------------------------------------------------------------------------------------------|------------------------------|---------------------------|-------------------------|------------------------|-----------------------------------------------|----------|------------------------------|---------------------------|-------------------------|------------------------|-----------|------------------------|--|--|
|                 | q-value                                                                                                                            | log <sub>2</sub> Methylamine | log <sub>2</sub> Methanol | log <sub>2</sub> Sc Sum | log <sub>2</sub> Ratio | Regulation                                    | q-value  | log <sub>2</sub> Methylamine | log <sub>2</sub> Methanol | log <sub>2</sub> PI Sum | log <sub>2</sub> Ratio | Consensus | Log <sub>2</sub> Ratio |  |  |
| <b>MFLA1509</b> | 0                                                                                                                                  | 7.207                        | 6.064                     | 7.746                   | 1.208                  | R ●●●●                                        | 5.57 E-2 | 27.305                       | 25.527                    | 27.674                  | 1.935                  | R ●●●●    |                        |  |  |
|                 | <i>ribosomal protein L32 [Methylobacillus flagellatus KT]637938420 YP_545618</i>                                                   |                              |                           |                         |                        |                                               |          |                              |                           |                         |                        |           |                        |  |  |
| <b>MFLA1510</b> |                                                                                                                                    | 6.273                        | 4.258                     | 6.592                   | 1.247                  | Y ●●●●                                        | 1.59 E-1 | 23.418                       | 22.732                    | 24.116                  | 0.681                  | Y ●●●●    |                        |  |  |
|                 | <i>protein of unknown function DUF177 [Methylobacillus flagellatus KT]637938421 YP_545619</i>                                      |                              |                           |                         |                        |                                               |          |                              |                           |                         |                        |           |                        |  |  |
| <b>MFLA1511</b> | 1.25 E-1                                                                                                                           | 7.230                        | 7.187                     | 8.209                   | 0.037                  | Y ●●●●                                        | 2.12 E-2 | 26.995                       | 27.755                    | 28.424                  | -0.802                 | Y ●●●●    |                        |  |  |
|                 | <i>" acetyl-CoA carboxylase, biotin carboxylase [Methylobacillus flagellatus KT]637938422 YP_545620 ""</i>                         |                              |                           |                         |                        |                                               |          |                              |                           |                         |                        |           |                        |  |  |
| <b>MFLA1512</b> | 0                                                                                                                                  | 9.043                        | 9.951                     | 10.567                  | -0.915                 | G ●●●●                                        | 1.26 E-2 | 28.807                       | 29.470                    | 30.176                  | -0.677                 | G ●●●●    |                        |  |  |
|                 | <i>oxaloacetate decarboxylase alpha subunit [Methylobacillus flagellatus KT]637938423 YP_545621</i>                                |                              |                           |                         |                        |                                               |          |                              |                           |                         |                        |           |                        |  |  |
| <b>MFLA1513</b> |                                                                                                                                    | 2.106                        | 2.806                     | 3.498                   | -0.700                 | Y ●●●●                                        |          | 22.641                       | 22.498                    | 23.571                  | 0.143                  | Y ●●●●    |                        |  |  |
|                 | <i>maf protein [Methylobacillus flagellatus KT]637938424 YP_545622</i>                                                             |                              |                           |                         |                        |                                               |          |                              |                           |                         |                        |           |                        |  |  |
| <b>MFLA1514</b> | 1.15 E-2                                                                                                                           | 6.448                        | 6.580                     | 7.515                   | -0.140                 | Y ●●●●                                        | 1.48 E-1 | 26.018                       | 25.909                    | 26.964                  | 0.122                  | Y ●●●●    |                        |  |  |
|                 | <i>hypothetical protein [Methylobacillus flagellatus KT]637938425 YP_545623</i>                                                    |                              |                           |                         |                        |                                               |          |                              |                           |                         |                        |           |                        |  |  |
| <b>MFLA1515</b> |                                                                                                                                    | 3.656                        | 2.000                     | 4.054                   | 0.656                  | Y ●●●●                                        | 1.48 E-1 | 21.084                       | 20.481                    | 21.813                  | -0.479                 | Y ●●●●    |                        |  |  |
|                 | <i>Uroporphyrin-III C/tetrapyrrole (Corrin/Porphyrin) methyltransferase [Methylobacillus flagellatus KT]637938426 YP_545624</i>    |                              |                           |                         |                        |                                               |          |                              |                           |                         |                        |           |                        |  |  |
| <b>MFLA1516</b> |                                                                                                                                    | 0.000                        | 0.000                     |                         |                        | ●●●●                                          |          | 0.000                        | 0.000                     |                         |                        | ●●●●      |                        |  |  |
|                 | <i>Ribonuclease H [Methylobacillus flagellatus KT]637938427 YP_545625</i>                                                          |                              |                           |                         |                        |                                               |          |                              |                           |                         |                        |           |                        |  |  |
| <b>MFLA1517</b> |                                                                                                                                    | 2.843                        | 2.529                     | 3.694                   | 1.584                  | Y ●●●●                                        | 6.31 E-2 | 20.649                       | 22.571                    | 22.909                  | -0.914                 | Y ●●●●    |                        |  |  |
|                 | <i>lipid-A-disaccharide synthase [Methylobacillus flagellatus KT]637938428 YP_545626</i>                                           |                              |                           |                         |                        |                                               |          |                              |                           |                         |                        |           |                        |  |  |
| <b>MFLA1518</b> | 3.03 E-2                                                                                                                           | 6.631                        | 6.276                     | 7.464                   | 0.345                  | Y ●●●●                                        | 3.26 E-2 | 24.393                       | 24.828                    | 25.627                  | -0.430                 | Y ●●●●    |                        |  |  |
|                 | <i>acyl-(acyl-carrier-protein)--UDP-N- acetylglucosamine O-acyltransferase [Methylobacillus flagellatus KT]637938429 YP_545627</i> |                              |                           |                         |                        |                                               |          |                              |                           |                         |                        |           |                        |  |  |
| <b>MFLA1519</b> |                                                                                                                                    | 4.623                        |                           | 4.623                   |                        | Y ●●●●                                        |          | 24.503                       |                           | 24.503                  |                        | Y ●●●●    |                        |  |  |
|                 | <i>beta-hydroxyacyl-(acyl-carrier-protein) dehydratase FabZ [Methylobacillus flagellatus KT]637938430 YP_545628</i>                |                              |                           |                         |                        |                                               |          |                              |                           |                         |                        |           |                        |  |  |
| <b>MFLA1520</b> | 5.21 E-2                                                                                                                           | 5.101                        | 5.001                     | 6.052                   | 0.017                  | Y ●●●●                                        | 4.84 E-2 | 24.359                       | 24.813                    | 25.604                  | -0.458                 | Y ●●●●    |                        |  |  |
|                 | <i>UDP-3-O-(3-hydroxymyristoyl) glucosamine N-acyltransferase [Methylobacillus flagellatus KT]637938431 YP_545629</i>              |                              |                           |                         |                        |                                               |          |                              |                           |                         |                        |           |                        |  |  |
| <b>MFLA1521</b> |                                                                                                                                    | 8.219                        | 7.758                     | 9.007                   | 0.494                  | Y ●●●●                                        | 3.09 E-2 | 27.454                       | 28.071                    | 28.795                  | -0.617                 | Y ●●●●    |                        |  |  |
|                 | <i>outer membrane chaperone Skp (OmpH) [Methylobacillus flagellatus KT]637938432 YP_545630</i>                                     |                              |                           |                         |                        |                                               |          |                              |                           |                         |                        |           |                        |  |  |
| <b>MFLA1522</b> | 8.78 E-3                                                                                                                           | 7.470                        | 7.185                     | 8.334                   | 0.269                  | Y ●●●●                                        | 1.82 E-2 | 26.732                       | 27.068                    | 27.909                  | -0.335                 | Y ●●●●    |                        |  |  |
|                 | <i>surface antigen (D15) [Methylobacillus flagellatus KT]637938433 YP_545631</i>                                                   |                              |                           |                         |                        |                                               |          |                              |                           |                         |                        |           |                        |  |  |
| <b>MFLA1523</b> |                                                                                                                                    | 1.106                        | 2.505                     | 2.969                   | -0.390                 | Y ●●●●                                        | 8.3 E-2  | 20.833                       | 20.656                    | 21.747                  | 1.345                  | Y ●●●●    |                        |  |  |
|                 | <i>" Peptidase M50, putative membrane-associated zinc metallopeptidase [Methylobacillus flagellatus KT]637938434 YP_545632 ""</i>  |                              |                           |                         |                        |                                               |          |                              |                           |                         |                        |           |                        |  |  |
| <b>MFLA1524</b> |                                                                                                                                    |                              | 1.000                     | 1.000                   |                        | Y ●●●●                                        |          |                              | 19.948                    | 19.948                  |                        | Y ●●●●    |                        |  |  |
|                 | <i>1-deoxy-D-xylulose-5-phosphate reductoisomerase [Methylobacillus flagellatus KT]637938435 YP_545633</i>                         |                              |                           |                         |                        |                                               |          |                              |                           |                         |                        |           |                        |  |  |
| <b>MFLA1525</b> |                                                                                                                                    | 0.000                        | 0.000                     |                         |                        | ●●●●                                          |          | 0.000                        | 0.000                     |                         |                        | ●●●●      |                        |  |  |
|                 | <i>phosphatidate cytidyltransferase [Methylobacillus flagellatus KT]637938436 YP_545634</i>                                        |                              |                           |                         |                        |                                               |          |                              |                           |                         |                        |           |                        |  |  |
| <b>MFLA1526</b> |                                                                                                                                    | 0.000                        | 0.000                     |                         |                        | ●●●●                                          |          | 0.000                        | 0.000                     |                         |                        | ●●●●      |                        |  |  |
|                 | <i>undecaprenyl diphosphate synthase [Methylobacillus flagellatus KT]637938437 YP_545635</i>                                       |                              |                           |                         |                        |                                               |          |                              |                           |                         |                        |           |                        |  |  |
| <b>MFLA1527</b> | 2.37 E-2                                                                                                                           | 6.043                        | 5.633                     | 6.852                   | 0.400                  | Y ●●●●                                        | 8.4 E-2  | 26.318                       | 26.623                    | 27.478                  | -0.333                 | Y ●●●●    |                        |  |  |
|                 | <i>ribosome recycling factor [Methylobacillus flagellatus KT]637938438 YP_545636</i>                                               |                              |                           |                         |                        |                                               |          |                              |                           |                         |                        |           |                        |  |  |
| <b>MFLA1528</b> | 0                                                                                                                                  | 6.353                        | 7.553                     | 8.074                   | -1.152                 | G ●●●●                                        | 2.19 E-1 | 26.210                       | 26.039                    | 27.127                  | 0.007                  | Y ●●●●    |                        |  |  |
|                 | <i>Uridylate kinase [Methylobacillus flagellatus KT]637938439 YP_545637</i>                                                        |                              |                           |                         |                        |                                               |          |                              |                           |                         |                        |           |                        |  |  |
| <b>MFLA1529</b> | 0                                                                                                                                  | 10.156                       | 10.904                    | 11.578                  | -0.824                 | G ●●●●                                        | 1.77 E-2 | 28.847                       | 29.549                    | 30.240                  | -0.717                 | G ●●●●    |                        |  |  |
|                 | <i>translation elongation factor Ts [Methylobacillus flagellatus KT]637938440 YP_545638</i>                                        |                              |                           |                         |                        |                                               |          |                              |                           |                         |                        |           |                        |  |  |
| <b>MFLA1530</b> | 1.07 E-1                                                                                                                           | 8.002                        | 8.121                     | 9.063                   | -0.118                 | Y ●●●●                                        | 1.05 E-1 | 29.567                       | 29.835                    | 30.707                  | -0.290                 | Y ●●●●    |                        |  |  |
|                 | <i>ribosomal protein S2 [Methylobacillus flagellatus KT]637938441 YP_545639</i>                                                    |                              |                           |                         |                        |                                               |          |                              |                           |                         |                        |           |                        |  |  |



| ORF             | AM/OH <i>M. Flagellatus</i> Spectral Count                                                                               |                      |                   |                 |                |            | AM/OH <i>M. Flagellatus</i> Protein Intensity |                      |                   |                 |                |                        | Consensus | Spectral Count |   | Protein Intensity |  |
|-----------------|--------------------------------------------------------------------------------------------------------------------------|----------------------|-------------------|-----------------|----------------|------------|-----------------------------------------------|----------------------|-------------------|-----------------|----------------|------------------------|-----------|----------------|---|-------------------|--|
|                 | $q$ -value                                                                                                               | $\log_2$ Methylamine | $\log_2$ Methanol | $\log_2$ Sc Sum | $\log_2$ Ratio | Regulation | $q$ -value                                    | $\log_2$ Methylamine | $\log_2$ Methanol | $\log_2$ PI Sum | $\log_2$ Ratio | Log <sub>2</sub> Ratio |           | -7             | 0 | 7                 |  |
| <b>MFLA1531</b> | 6.46 E-2                                                                                                                 | 5.315                | 4.915             | 6.129           | 0.404          | Y ●● Y     | 1.12 E-2                                      | 23.583               | 24.556            | 25.150          | -0.965         | Y ●                    |           |                |   |                   |  |
|                 | " methionine aminopeptidase, type I [Methylobacillus flagellatus KT]637938442 YP_545640 ""                               |                      |                   |                 |                |            |                                               |                      |                   |                 |                |                        |           |                |   |                   |  |
| <b>MFLA1532</b> |                                                                                                                          | 5.120                | 4.360             | 5.789           | 0.605          | Y ●● Y     | 1.93 E-1                                      | 22.702               | 22.284            | 23.508          | -0.085         | Y ●                    |           |                |   |                   |  |
|                 | " UTP-GlnB (protein PII) uridylyltransferase, GlnD [Methylobacillus flagellatus KT]637938443 YP_545641 ""                |                      |                   |                 |                |            |                                               |                      |                   |                 |                |                        |           |                |   |                   |  |
| <b>MFLA1533</b> |                                                                                                                          | 7.979                | 8.451             | 9.235           | -0.658         | Y ●● Y     | 5.77 E-2                                      | 27.163               | 27.855            | 28.550          | -0.671         | Y ●                    |           |                |   |                   |  |
|                 | " protein of unknown function DUF861, cupin_3 [Methylobacillus flagellatus KT]637938444 YP_545642 ""                     |                      |                   |                 |                |            |                                               |                      |                   |                 |                |                        |           |                |   |                   |  |
| <b>MFLA1534</b> |                                                                                                                          | 0.000                | 0.000             |                 |                | ■ ■        |                                               | 0.000                | 0.000             |                 |                | ■                      |           |                |   |                   |  |
|                 | Alkanesulfonate monooxygenase [Methylobacillus flagellatus KT]637938445 YP_545643                                        |                      |                   |                 |                |            |                                               |                      |                   |                 |                |                        |           |                |   |                   |  |
| <b>MFLA1535</b> |                                                                                                                          | 0.000                | 0.000             |                 |                | ■ ■        |                                               | 0.000                | 0.000             |                 |                | ■                      |           |                |   |                   |  |
|                 | Alkanesulfonate monooxygenase [Methylobacillus flagellatus KT]637938446 YP_545644                                        |                      |                   |                 |                |            |                                               |                      |                   |                 |                |                        |           |                |   |                   |  |
| <b>MFLA1536</b> |                                                                                                                          | 0.000                | 0.000             |                 |                | ■ ■        |                                               | 0.000                | 0.000             |                 |                | ■                      |           |                |   |                   |  |
|                 | Haloacid dehalogenase-like hydrolase [Methylobacillus flagellatus KT]637938447 YP_545645                                 |                      |                   |                 |                |            |                                               |                      |                   |                 |                |                        |           |                |   |                   |  |
| <b>MFLA1537</b> |                                                                                                                          | 0.000                | 0.000             |                 |                | ■ ■        |                                               | 0.000                | 0.000             |                 |                | ■                      |           |                |   |                   |  |
|                 | hypothetical protein [Methylobacillus flagellatus KT]637938448 YP_545646                                                 |                      |                   |                 |                |            |                                               |                      |                   |                 |                |                        |           |                |   |                   |  |
| <b>MFLA1538</b> |                                                                                                                          | 0.000                | 0.000             |                 |                | ■ ■        |                                               | 0.000                | 0.000             |                 |                | ■                      |           |                |   |                   |  |
|                 | nitroreductase [Methylobacillus flagellatus KT]637938449 YP_545647                                                       |                      |                   |                 |                |            |                                               |                      |                   |                 |                |                        |           |                |   |                   |  |
| <b>MFLA1539</b> |                                                                                                                          | 0.000                | 0.000             |                 |                | ■ ■        |                                               | 0.000                | 0.000             |                 |                | ■                      |           |                |   |                   |  |
|                 | " extracellular solute-binding protein, family 5 [Methylobacillus flagellatus KT]637938450 YP_545648 ""                  |                      |                   |                 |                |            |                                               |                      |                   |                 |                |                        |           |                |   |                   |  |
| <b>MFLA1540</b> |                                                                                                                          | 0.000                | 0.000             |                 |                | ■ ■        |                                               | 0.000                | 0.000             |                 |                | ■                      |           |                |   |                   |  |
|                 | ABC transporter related [Methylobacillus flagellatus KT]637938451 YP_545649                                              |                      |                   |                 |                |            |                                               |                      |                   |                 |                |                        |           |                |   |                   |  |
| <b>MFLA1541</b> |                                                                                                                          | 0.000                | 0.000             |                 |                | ■ ■        |                                               | 0.000                | 0.000             |                 |                | ■                      |           |                |   |                   |  |
|                 | binding-protein-dependent transport systems inner membrane component [Methylobacillus flagellatus KT]637938452 YP_545650 |                      |                   |                 |                |            |                                               |                      |                   |                 |                |                        |           |                |   |                   |  |
| <b>MFLA1542</b> |                                                                                                                          | 0.000                | 0.000             |                 |                | ■ ■        |                                               | 0.000                | 0.000             |                 |                | ■                      |           |                |   |                   |  |
|                 | binding-protein-dependent transport systems inner membrane component [Methylobacillus flagellatus KT]637938453 YP_545651 |                      |                   |                 |                |            |                                               |                      |                   |                 |                |                        |           |                |   |                   |  |
| <b>MFLA1543</b> | 4.547                                                                                                                    | 2.254                | 4.815             | 2.440           | Y ●● Y         |            | 1.41 E-2                                      | 21.557               | 21.098            | 22.346          | 0.464          | Y ●                    |           |                |   |                   |  |
|                 | " HAD-superfamily hydrolase subfamily IA, variant 3 [Methylobacillus flagellatus KT]637938454 YP_545652 ""               |                      |                   |                 |                |            |                                               |                      |                   |                 |                |                        |           |                |   |                   |  |
| <b>MFLA1544</b> |                                                                                                                          | 0.000                | 0.000             |                 |                | ■ ■        |                                               | 0.000                | 0.000             |                 |                | ■                      |           |                |   |                   |  |
|                 | luciferase-like protein [Methylobacillus flagellatus KT]637938455 YP_545653                                              |                      |                   |                 |                |            |                                               |                      |                   |                 |                |                        |           |                |   |                   |  |
| <b>MFLA1545</b> | 1.106                                                                                                                    | 0.000                | 1.656             | 1.106           | Y ●● Y         |            |                                               | 20.238               | 17.459            | 20.434          | 2.779          | Y ●                    |           |                |   |                   |  |
|                 | hypothetical protein [Methylobacillus flagellatus KT]637938456 YP_545654                                                 |                      |                   |                 |                |            |                                               |                      |                   |                 |                |                        |           |                |   |                   |  |
| <b>MFLA1546</b> |                                                                                                                          | 0.000                | 0.000             |                 |                | ■ ■        |                                               | 0.000                | 0.000             |                 |                | ■                      |           |                |   |                   |  |
|                 | " thermophilic desulfurizing enzyme, TdsB protein [Methylobacillus flagellatus KT]637938457 YP_545655 ""                 |                      |                   |                 |                |            |                                               |                      |                   |                 |                |                        |           |                |   |                   |  |
| <b>MFLA1547</b> | 0.521                                                                                                                    |                      | 0.521             |                 | Y ●● Y         |            |                                               | 17.575               |                   | 17.575          |                | Y ●                    |           |                |   |                   |  |
|                 | TonB-dependent receptor [Methylobacillus flagellatus KT]637938458 YP_545656                                              |                      |                   |                 |                |            |                                               |                      |                   |                 |                |                        |           |                |   |                   |  |
| <b>MFLA1548</b> |                                                                                                                          | 0.000                | 0.000             |                 |                | ■ ■        |                                               | 0.000                | 0.000             |                 |                | ■                      |           |                |   |                   |  |
|                 | ABC transporter related [Methylobacillus flagellatus KT]637938459 YP_545657                                              |                      |                   |                 |                |            |                                               |                      |                   |                 |                |                        |           |                |   |                   |  |
| <b>MFLA1549</b> |                                                                                                                          | 0.000                | 0.000             |                 |                | ■ ■        |                                               | 0.000                | 0.000             |                 |                | ■                      |           |                |   |                   |  |
|                 | ABC transporter related [Methylobacillus flagellatus KT]637938460 YP_545658                                              |                      |                   |                 |                |            |                                               |                      |                   |                 |                |                        |           |                |   |                   |  |
| <b>MFLA1550</b> |                                                                                                                          | 0.000                | 0.000             |                 |                | ■ ■        |                                               | 0.000                | 0.000             |                 |                | ■                      |           |                |   |                   |  |
|                 | " thermophilic desulfurizing enzyme, TdsB protein [Methylobacillus flagellatus KT]637938461 YP_545659 ""                 |                      |                   |                 |                |            |                                               |                      |                   |                 |                |                        |           |                |   |                   |  |
| <b>MFLA1551</b> | 0                                                                                                                        | 8.423                | 6.268             | 8.715           | 2.163          | R ●● Y     | 1.1 E-2                                       | 27.073               | 26.207            | 27.704          | 0.870          | R ●                    |           |                |   |                   |  |
|                 | Peroxidase [Methylobacillus flagellatus KT]637938462 YP_545660                                                           |                      |                   |                 |                |            |                                               |                      |                   |                 |                |                        |           |                |   |                   |  |
| <b>MFLA1552</b> |                                                                                                                          | 0.000                | 0.000             |                 |                | ■ ■        |                                               | 0.000                | 0.000             |                 |                | ■                      |           |                |   |                   |  |
|                 | protein of unknown function DUF81 [Methylobacillus flagellatus KT]637938464 YP_545661                                    |                      |                   |                 |                |            |                                               |                      |                   |                 |                |                        |           |                |   |                   |  |

| ORF             | AM/OH <i>M. Flagellatus</i> Spectral Count                                                                                            |                              |                           |                         |                        |            | AM/OH <i>M. Flagellatus</i> Protein Intensity |                              |                           |                         |                        |                        | Consensus | Spectral Count<br>Protein Intensity |
|-----------------|---------------------------------------------------------------------------------------------------------------------------------------|------------------------------|---------------------------|-------------------------|------------------------|------------|-----------------------------------------------|------------------------------|---------------------------|-------------------------|------------------------|------------------------|-----------|-------------------------------------|
|                 | q-value                                                                                                                               | log <sub>2</sub> Methylamine | log <sub>2</sub> Methanol | log <sub>2</sub> Sc Sum | log <sub>2</sub> Ratio | Regulation | q-value                                       | log <sub>2</sub> Methylamine | log <sub>2</sub> Methanol | log <sub>2</sub> PI Sum | log <sub>2</sub> Ratio | Log <sub>2</sub> Ratio |           |                                     |
| <b>MFLA1553</b> |                                                                                                                                       | 0.521                        |                           | 0.521                   |                        | Y ●● Y     |                                               | 18.261                       |                           | 18.261                  |                        | Y ●                    |           |                                     |
|                 | <i>" DNA polymerase III, epsilon subunit [Methylobacillus flagellatus KT]637938465 YP_545662 ""</i>                                   |                              |                           |                         |                        |            |                                               |                              |                           |                         |                        |                        |           |                                     |
| <b>MFLA1554</b> |                                                                                                                                       | 0.000                        | 0.000                     |                         |                        | ■●         |                                               | 0.000                        |                           | 0.000                   |                        | ■                      |           |                                     |
|                 | <i>ABC transporter related [Methylobacillus flagellatus KT]637938466 YP_545663</i>                                                    |                              |                           |                         |                        |            |                                               |                              |                           |                         |                        |                        |           |                                     |
| <b>MFLA1555</b> |                                                                                                                                       | 1.106                        |                           | 1.106                   |                        | Y ●● Y     |                                               | 21.855                       |                           | 21.855                  |                        | Y ●                    |           |                                     |
|                 | <i>ABC transporter related [Methylobacillus flagellatus KT]637938467 YP_545664</i>                                                    |                              |                           |                         |                        |            |                                               |                              |                           |                         |                        |                        |           |                                     |
| <b>MFLA1556</b> |                                                                                                                                       | 0.000                        | 0.000                     |                         |                        | ■●         |                                               | 0.000                        |                           | 0.000                   |                        | ■                      |           |                                     |
|                 | <i>binding-protein-dependent transport systems inner membrane component [Methylobacillus flagellatus KT]637938468 YP_545665</i>       |                              |                           |                         |                        |            |                                               |                              |                           |                         |                        |                        |           |                                     |
| <b>MFLA1557</b> |                                                                                                                                       | 0.000                        | 0.000                     |                         |                        | ■●         |                                               | 0.000                        |                           | 0.000                   |                        | ■                      |           |                                     |
|                 | <i>binding-protein-dependent transport systems inner membrane component [Methylobacillus flagellatus KT]637938469 YP_545666</i>       |                              |                           |                         |                        |            |                                               |                              |                           |                         |                        |                        |           |                                     |
| <b>MFLA1558</b> |                                                                                                                                       | 0.000                        | 0.000                     |                         |                        | ■●         |                                               | 0.000                        |                           | 0.000                   |                        | ■                      |           |                                     |
|                 | <i>Biopolymer transport protein ExbD/ToR [Methylobacillus flagellatus KT]637938470 YP_545667</i>                                      |                              |                           |                         |                        |            |                                               |                              |                           |                         |                        |                        |           |                                     |
| <b>MFLA1559</b> |                                                                                                                                       | 0.000                        | 0.000                     |                         |                        | ■●         |                                               | 0.000                        |                           | 0.000                   |                        | ■                      |           |                                     |
|                 | <i>MotA/ToIQ/ExbB proton channel [Methylobacillus flagellatus KT]637938471 YP_545668</i>                                              |                              |                           |                         |                        |            |                                               |                              |                           |                         |                        |                        |           |                                     |
| <b>MFLA1560</b> |                                                                                                                                       | 0.000                        | 0.000                     |                         |                        | ■●         |                                               | 0.000                        |                           | 0.000                   |                        | ■                      |           |                                     |
|                 | <i>TonB-like protein [Methylobacillus flagellatus KT]637938472 YP_545669</i>                                                          |                              |                           |                         |                        |            |                                               |                              |                           |                         |                        |                        |           |                                     |
| <b>MFLA1561</b> |                                                                                                                                       | 0.000                        | 0.000                     |                         |                        | ■●         |                                               | 0.000                        |                           | 0.000                   |                        | ■                      |           |                                     |
|                 | <i>ABC transporter related [Methylobacillus flagellatus KT]637938473 YP_545670</i>                                                    |                              |                           |                         |                        |            |                                               |                              |                           |                         |                        |                        |           |                                     |
| <b>MFLA1562</b> |                                                                                                                                       | 0.000                        | 0.000                     |                         |                        | ■●         |                                               | 0.000                        |                           | 0.000                   |                        | ■                      |           |                                     |
|                 | <i>hypothetical protein [Methylobacillus flagellatus KT]637938474 YP_545671</i>                                                       |                              |                           |                         |                        |            |                                               |                              |                           |                         |                        |                        |           |                                     |
| <b>MFLA1563</b> |                                                                                                                                       |                              | 0.000                     | 0.000                   |                        | Y ●● Y     |                                               |                              | 17.301                    | 17.301                  |                        | Y ●                    |           |                                     |
|                 | <i>" sulfonate ABC transporter, periplasmic sulfonate-binding protein SsuA [Methylobacillus flagellatus KT]637938475 YP_545672 ""</i> |                              |                           |                         |                        |            |                                               |                              |                           |                         |                        |                        |           |                                     |
| <b>MFLA1564</b> |                                                                                                                                       | 0.000                        | 0.000                     |                         |                        | ■●         |                                               | 0.000                        |                           | 0.000                   |                        | ■                      |           |                                     |
|                 | <i>" sulfonate ABC transporter, periplasmic sulfonate-binding protein SsuA [Methylobacillus flagellatus KT]637938476 YP_545673 ""</i> |                              |                           |                         |                        |            |                                               |                              |                           |                         |                        |                        |           |                                     |
| <b>MFLA1565</b> |                                                                                                                                       | 0.000                        | 0.000                     |                         |                        | ■●         |                                               | 0.000                        |                           | 0.000                   |                        | ■                      |           |                                     |
|                 | <i>" monooxygenase, putative [Methylobacillus flagellatus KT]637938477 YP_545674 ""</i>                                               |                              |                           |                         |                        |            |                                               |                              |                           |                         |                        |                        |           |                                     |
| <b>MFLA1566</b> |                                                                                                                                       | 0.000                        | 0.000                     |                         |                        | ■●         |                                               | 0.000                        |                           | 0.000                   |                        | ■                      |           |                                     |
|                 | <i>class II aldolase/adducin-like protein [Methylobacillus flagellatus KT]637938478 YP_545675</i>                                     |                              |                           |                         |                        |            |                                               |                              |                           |                         |                        |                        |           |                                     |
| <b>MFLA1567</b> |                                                                                                                                       | 1.106                        |                           | 1.106                   |                        | Y ●● Y     |                                               | 18.169                       |                           | 18.169                  |                        | Y ●                    |           |                                     |
|                 | <i>" sigma-54 factor, interaction region [Methylobacillus flagellatus KT]637938479 YP_545676 ""</i>                                   |                              |                           |                         |                        |            |                                               |                              |                           |                         |                        |                        |           |                                     |
| <b>MFLA1568</b> |                                                                                                                                       | 4.312                        | 3.857                     | 5.103                   | 0.453                  | Y ●● Y     | 4.08 E-2                                      | 22.820                       | 21.814                    | 23.403                  | 0.960                  | Y ●                    |           |                                     |
|                 | <i>hypothetical protein [Methylobacillus flagellatus KT]637938480 YP_545677</i>                                                       |                              |                           |                         |                        |            |                                               |                              |                           |                         |                        |                        |           |                                     |
| <b>MFLA1569</b> |                                                                                                                                       | 1.843                        | 1.710                     | 2.778                   | 1.169                  | Y ●● Y     | 2.81 E-2                                      | 21.839                       | 20.887                    | 22.440                  | 1.973                  | Y ●                    |           |                                     |
|                 | <i>NADPH-dependent FMN reductase [Methylobacillus flagellatus KT]637938481 YP_545678</i>                                              |                              |                           |                         |                        |            |                                               |                              |                           |                         |                        |                        |           |                                     |
| <b>MFLA1570</b> |                                                                                                                                       |                              | 1.000                     | 1.000                   |                        | Y ●● Y     |                                               |                              | 22.848                    | 22.848                  |                        | Y ●                    |           |                                     |
|                 | <i>methyl-accepting chemotaxis sensory transducer [Methylobacillus flagellatus KT]637938482 YP_545679</i>                             |                              |                           |                         |                        |            |                                               |                              |                           |                         |                        |                        |           |                                     |
| <b>MFLA1571</b> |                                                                                                                                       | 0.000                        | 0.000                     |                         |                        | ■●         |                                               | 0.000                        |                           | 0.000                   |                        | ■                      |           |                                     |
|                 | <i>adenylate/guanylate cyclase [Methylobacillus flagellatus KT]637938483 YP_545680</i>                                                |                              |                           |                         |                        |            |                                               |                              |                           |                         |                        |                        |           |                                     |
| <b>MFLA1572</b> |                                                                                                                                       | 7.45 E-2                     | 6.261                     | 6.286                   | 7.273                  | 0.010      | Y ●● Y                                        | 5.44 E-2                     | 24.229                    | 25.683                  | -0.742                 | Y ●                    |           |                                     |
|                 | <i>" DNA polymerase III, subunits gamma and tau [Methylobacillus flagellatus KT]637938484 YP_545681 ""</i>                            |                              |                           |                         |                        |            |                                               |                              |                           |                         |                        |                        |           |                                     |
| <b>MFLA1573</b> |                                                                                                                                       | 4.46 E-2                     | 7.154                     | 6.881                   | 8.024                  | 0.269      | Y ●● Y                                        | 4.59 E-2                     | 26.715                    | 26.042                  | 27.417                 | 0.642                  | Y ●       |                                     |
|                 | <i>conserved hypothetical protein 103 [Methylobacillus flagellatus KT]637938485 YP_545682</i>                                         |                              |                           |                         |                        |            |                                               |                              |                           |                         |                        |                        |           |                                     |
| <b>MFLA1574</b> |                                                                                                                                       | 3.718                        | 2.871                     | 4.356                   | 0.820                  | Y ●● Y     | 2.8 E-2                                       | 23.872                       | 21.471                    | 24.122                  | 2.365                  | Y ●                    |           |                                     |
|                 | <i>recombination protein RecR [Methylobacillus flagellatus KT]637938486 YP_545683</i>                                                 |                              |                           |                         |                        |            |                                               |                              |                           |                         |                        |                        |           |                                     |

| ORF             | AM/OH <i>M. Flagellatus</i> Spectral Count                                                                          |                              |                           |                         |                        | AM/OH <i>M. Flagellatus</i> Protein Intensity |                 |                              |                           |                         | Spectral Count         |           | Protein Intensity      |  |  |
|-----------------|---------------------------------------------------------------------------------------------------------------------|------------------------------|---------------------------|-------------------------|------------------------|-----------------------------------------------|-----------------|------------------------------|---------------------------|-------------------------|------------------------|-----------|------------------------|--|--|
|                 | <i>q</i> -value                                                                                                     | log <sub>2</sub> Methylamine | log <sub>2</sub> Methanol | log <sub>2</sub> Sc Sum | log <sub>2</sub> Ratio | Regulation                                    | <i>q</i> -value | log <sub>2</sub> Methylamine | log <sub>2</sub> Methanol | log <sub>2</sub> PI Sum | log <sub>2</sub> Ratio | Consensus | Log <sub>2</sub> Ratio |  |  |
| <b>MFLA1575</b> |                                                                                                                     | 3.802                        | 3.117                     | 4.500                   | 0.147                  | Y ●● Y                                        | 2.29 E-1        | 21.880                       | 22.124                    | 23.007                  | -1.127                 | Y ●       |                        |  |  |
|                 | <i>phosphoglycolate phosphatase [Methylobacillus flagellatus KT]637938487 YP_545684</i>                             |                              |                           |                         |                        |                                               |                 |                              |                           |                         |                        |           |                        |  |  |
| <b>MFLA1576</b> |                                                                                                                     | 4.683                        | 4.219                     | 5.470                   | 0.469                  | Y ●● Y                                        | 1.51 E-1        | 24.302                       | 24.114                    | 25.211                  | 0.236                  | Y ●       |                        |  |  |
|                 | <i>ubiquinone biosynthesis O-methyltransferase [Methylobacillus flagellatus KT]637938488 YP_545685</i>              |                              |                           |                         |                        |                                               |                 |                              |                           |                         |                        |           |                        |  |  |
| <b>MFLA1577</b> |                                                                                                                     | 4.397                        | 1.322                     | 4.559                   | 2.028                  | Y ●● Y                                        | 1.83 E-1        | 22.099                       | 20.502                    | 22.511                  | 0.343                  | Y ●       |                        |  |  |
|                 | <i>amidohydrolase [Methylobacillus flagellatus KT]637938489 YP_545686</i>                                           |                              |                           |                         |                        |                                               |                 |                              |                           |                         |                        |           |                        |  |  |
| <b>MFLA1578</b> |                                                                                                                     | 11.873                       | 11.956                    | 12.915                  | -0.093                 | Y ●● Y                                        | 8.26 E-2        | 30.921                       | 31.201                    | 32.068                  | -0.301                 | Y ●       |                        |  |  |
|                 | <i>OmpA/MotB [Methylobacillus flagellatus KT]637938490 YP_545687</i>                                                |                              |                           |                         |                        |                                               |                 |                              |                           |                         |                        |           |                        |  |  |
| <b>MFLA1579</b> |                                                                                                                     | 0.521                        | 2.710                     | 2.996                   | -1.153                 | Y ●● Y                                        | 1.17 E-1        | 19.309                       | 21.380                    | 21.688                  | -0.977                 | Y ●       |                        |  |  |
|                 | <i>protein of unknown function DUF556 [Methylobacillus flagellatus KT]637938491 YP_545688</i>                       |                              |                           |                         |                        |                                               |                 |                              |                           |                         |                        |           |                        |  |  |
| <b>MFLA1580</b> |                                                                                                                     | 2.600                        |                           | 2.600                   |                        | Y ●● Y                                        |                 | 20.720                       |                           | 20.720                  |                        | Y ●       |                        |  |  |
|                 | <i>hypothetical protein [Methylobacillus flagellatus KT]637938492 YP_545689</i>                                     |                              |                           |                         |                        |                                               |                 |                              |                           |                         |                        |           |                        |  |  |
| <b>MFLA1581</b> |                                                                                                                     | 4.312                        | 2.871                     | 4.765                   | 1.440                  | Y ●● Y                                        | 6.85 E-2        | 22.077                       | 21.618                    | 22.866                  | 0.455                  | Y ●       |                        |  |  |
|                 | <i>" dihydropteroate synthase, DHPS [Methylobacillus flagellatus KT]637938493 YP_545690 ""</i>                      |                              |                           |                         |                        |                                               |                 |                              |                           |                         |                        |           |                        |  |  |
| <b>MFLA1582</b> |                                                                                                                     | 4.324                        | 4.627                     | 5.484                   | -0.317                 | Y ●● Y                                        | 4.29 E-2        | 23.318                       | 24.137                    | 24.785                  | -0.780                 | Y ●       |                        |  |  |
|                 | <i>flavoprotein [Methylobacillus flagellatus KT]637938494 YP_545691</i>                                             |                              |                           |                         |                        |                                               |                 |                              |                           |                         |                        |           |                        |  |  |
| <b>MFLA1583</b> |                                                                                                                     | 7.867                        | 8.096                     | 8.986                   | -0.342                 | Y ●● Y                                        | 1.11 E-2        | 27.055                       | 27.878                    | 28.525                  | -0.835                 | Y ●       |                        |  |  |
|                 | <i>Adenylosuccinate synthase [Methylobacillus flagellatus KT]637938495 YP_545692</i>                                |                              |                           |                         |                        |                                               |                 |                              |                           |                         |                        |           |                        |  |  |
| <b>MFLA1584</b> |                                                                                                                     | 1.79 E-3                     | 6.112                     | 6.656                   | 7.410                  | G ●● Y                                        | 4.4 E-2         | 24.657                       | 25.057                    | 25.870                  | -0.417                 | G ●       |                        |  |  |
|                 | <i>" tRNA synthetase, class II (G, H, P and S) [Methylobacillus flagellatus KT]637938496 YP_545693 ""</i>           |                              |                           |                         |                        |                                               |                 |                              |                           |                         |                        |           |                        |  |  |
| <b>MFLA1585</b> |                                                                                                                     | 0.000                        | 0.000                     |                         |                        | ●●                                            |                 | 0.000                        | 0.000                     |                         |                        | ●         |                        |  |  |
|                 | <i>hypothetical protein [Methylobacillus flagellatus KT]637938497 YP_545694</i>                                     |                              |                           |                         |                        |                                               |                 |                              |                           |                         |                        |           |                        |  |  |
| <b>MFLA1586</b> |                                                                                                                     | 1.06 E-3                     | 6.956                     | 7.409                   | 8.200                  | Y ●● Y                                        | 9.54 E-2        | 27.345                       | 27.588                    | 28.472                  | -0.239                 | Y ●       |                        |  |  |
|                 | <i>HflC protein [Methylobacillus flagellatus KT]637938498 YP_545695</i>                                             |                              |                           |                         |                        |                                               |                 |                              |                           |                         |                        |           |                        |  |  |
| <b>MFLA1587</b> |                                                                                                                     | 1.1 E-2                      | 7.294                     | 7.606                   | 8.458                  | Y ●● Y                                        | 2.12 E-2        | 27.460                       | 27.905                    | 28.699                  | -0.456                 | Y ●       |                        |  |  |
|                 | <i>HflK protein [Methylobacillus flagellatus KT]637938499 YP_545696</i>                                             |                              |                           |                         |                        |                                               |                 |                              |                           |                         |                        |           |                        |  |  |
| <b>MFLA1588</b> |                                                                                                                     | 3.120                        | 0.585                     | 3.350                   | 1.535                  | Y ●● Y                                        | 2.28 E-1        | 20.919                       | 20.181                    | 21.596                  | -0.717                 | Y ●       |                        |  |  |
|                 | <i>Small GTP-binding protein domain [Methylobacillus flagellatus KT]637938500 YP_545697</i>                         |                              |                           |                         |                        |                                               |                 |                              |                           |                         |                        |           |                        |  |  |
| <b>MFLA1589</b> |                                                                                                                     | 7.194                        | 6.790                     | 8.006                   | 0.480                  | Y ●● Y                                        | 2.58 E-1        | 26.897                       | 26.956                    | 27.927                  | -0.039                 | Y ●       |                        |  |  |
|                 | <i>Host factor Hfq [Methylobacillus flagellatus KT]637938501 YP_545698</i>                                          |                              |                           |                         |                        |                                               |                 |                              |                           |                         |                        |           |                        |  |  |
| <b>MFLA1590</b> |                                                                                                                     | 6.693                        | 7.108                     | 7.915                   | -0.483                 | Y ●● Y                                        | 1.12 E-1        | 25.736                       | 26.197                    | 26.985                  | -0.626                 | Y ●       |                        |  |  |
|                 | <i>glutamyl-tRNA synthetase [Methylobacillus flagellatus KT]637938502 YP_545699</i>                                 |                              |                           |                         |                        |                                               |                 |                              |                           |                         |                        |           |                        |  |  |
| <b>MFLA1591</b> |                                                                                                                     | 5.610                        | 1.825                     | 5.711                   | 3.936                  | Y ●● Y                                        | 1.49 E-2        | 24.634                       | 20.149                    | 24.697                  | 4.473                  | Y ●       |                        |  |  |
|                 | <i>" RND efflux system, outer membrane lipoprotein, NodT [Methylobacillus flagellatus KT]637938503 YP_545700 ""</i> |                              |                           |                         |                        |                                               |                 |                              |                           |                         |                        |           |                        |  |  |
| <b>MFLA1592</b> |                                                                                                                     | 6.328                        | 6.212                     | 7.272                   | 0.205                  | Y ●● Y                                        | 4.59 E-2        | 25.469                       | 25.186                    | 26.335                  | 0.293                  | Y ●       |                        |  |  |
|                 | <i>Hydrophobe/amphiphile efflux-1 HAE1 [Methylobacillus flagellatus KT]637938504 YP_545701</i>                      |                              |                           |                         |                        |                                               |                 |                              |                           |                         |                        |           |                        |  |  |
| <b>MFLA1593</b> |                                                                                                                     | 1.55 E-5                     | 6.386                     | 5.541                   | 7.025                  | R ●● Y                                        | 3.82 E-2        | 25.806                       | 26.083                    | 26.951                  | -0.272                 | Y ●       |                        |  |  |
|                 | <i>secretion protein HlyD [Methylobacillus flagellatus KT]637938505 YP_545702</i>                                   |                              |                           |                         |                        |                                               |                 |                              |                           |                         |                        |           |                        |  |  |
| <b>MFLA1594</b> |                                                                                                                     | 0.521                        |                           | 0.521                   |                        | Y ●● Y                                        |                 | 18.754                       |                           | 18.754                  |                        | Y ●       |                        |  |  |
|                 | <i>" transcriptional regulator, TetR family [Methylobacillus flagellatus KT]637938506 YP_545703 ""</i>              |                              |                           |                         |                        |                                               |                 |                              |                           |                         |                        |           |                        |  |  |
| <b>MFLA1595</b> |                                                                                                                     | 0.000                        | 0.000                     |                         |                        | ●●                                            |                 | 0.000                        | 0.000                     |                         |                        | ●         |                        |  |  |
|                 | <i>hypothetical protein [Methylobacillus flagellatus KT]637938507 YP_545704</i>                                     |                              |                           |                         |                        |                                               |                 |                              |                           |                         |                        |           |                        |  |  |
| <b>MFLA1596</b> |                                                                                                                     | 4.562                        |                           | 4.562                   |                        | Y ●● Y                                        |                 | 22.894                       |                           | 22.894                  |                        | Y ●       |                        |  |  |
|                 | <i>hypothetical protein [Methylobacillus flagellatus KT]637938508 YP_545705</i>                                     |                              |                           |                         |                        |                                               |                 |                              |                           |                         |                        |           |                        |  |  |

| ORF             | AM/OH <i>M. Flagellatus</i> Spectral Count                                                           |                      |                   |                 |                |            | AM/OH <i>M. Flagellatus</i> Protein Intensity |                      |                   |                 |                |           | Spectral Count         |  | Protein Intensity |  |
|-----------------|------------------------------------------------------------------------------------------------------|----------------------|-------------------|-----------------|----------------|------------|-----------------------------------------------|----------------------|-------------------|-----------------|----------------|-----------|------------------------|--|-------------------|--|
|                 | $q$ -value                                                                                           | $\log_2$ Methylamine | $\log_2$ Methanol | $\log_2$ Sc Sum | $\log_2$ Ratio | Regulation | $q$ -value                                    | $\log_2$ Methylamine | $\log_2$ Methanol | $\log_2$ PI Sum | $\log_2$ Ratio | Consensus | Log <sub>2</sub> Ratio |  |                   |  |
| <b>MFLA1597</b> |                                                                                                      | 0.000                | 0.000             |                 |                |            |                                               | 0.000                | 0.000             |                 |                |           |                        |  |                   |  |
|                 | <i>zinc/iron permease [Methylobacillus flagellatus KT]637938509 YP_545706</i>                        |                      |                   |                 |                |            |                                               |                      |                   |                 |                |           |                        |  |                   |  |
| <b>MFLA1598</b> |                                                                                                      | 0.000                | 0.000             |                 |                |            |                                               | 0.000                | 0.000             |                 |                |           |                        |  |                   |  |
|                 | <i>protein of unknown function DUF1555 [Methylobacillus flagellatus KT]637938510 YP_545707</i>       |                      |                   |                 |                |            |                                               |                      |                   |                 |                |           |                        |  |                   |  |
| <b>MFLA1599</b> |                                                                                                      |                      | 0.000             | 0.000           |                | Y ●●● Y    |                                               |                      | 20.894            | 20.894          |                | Y ●●      |                        |  |                   |  |
|                 | <i>" TonB-dependent receptor, plug [Methylobacillus flagellatus KT]637938511 YP_545708 ""</i>        |                      |                   |                 |                |            |                                               |                      |                   |                 |                |           |                        |  |                   |  |
| <b>MFLA1600</b> |                                                                                                      |                      | 5.280             | 5.280           |                | Y ●●● Y    |                                               |                      | 24.148            | 24.148          |                | Y ●●      |                        |  |                   |  |
|                 | <i>hypothetical protein [Methylobacillus flagellatus KT]637938512 YP_545709</i>                      |                      |                   |                 |                |            |                                               |                      |                   |                 |                |           |                        |  |                   |  |
| <b>MFLA1601</b> |                                                                                                      | 0.000                | 0.000             |                 |                |            |                                               | 0.000                | 0.000             |                 |                |           |                        |  |                   |  |
|                 | <i>protein of unknown function DUF1555 [Methylobacillus flagellatus KT]637938513 YP_545710</i>       |                      |                   |                 |                |            |                                               |                      |                   |                 |                |           |                        |  |                   |  |
| <b>MFLA1602</b> |                                                                                                      | 0.000                | 0.000             |                 |                |            |                                               | 0.000                | 0.000             |                 |                |           |                        |  |                   |  |
|                 | <i>protein of unknown function DUF1555 [Methylobacillus flagellatus KT]637938514 YP_545711</i>       |                      |                   |                 |                |            |                                               |                      |                   |                 |                |           |                        |  |                   |  |
| <b>MFLA1603</b> |                                                                                                      | 3.761                | 3.483             | 4.628           | 0.236          | Y ●●● Y    | 1.75 E-2                                      | 23.179               | 22.449            | 23.860          | 0.724          | Y ●●      |                        |  |                   |  |
|                 | <i>" TonB-dependent receptor, plug [Methylobacillus flagellatus KT]637938515 YP_545712 ""</i>        |                      |                   |                 |                |            |                                               |                      |                   |                 |                |           |                        |  |                   |  |
| <b>MFLA1604</b> | 0                                                                                                    | 8.351                | 9.569             | 10.085          | -1.216         | G ●●● G    | 4.1 E-3                                       | 27.511               | 29.302            | 29.668          | -1.810         | G ●●      |                        |  |                   |  |
|                 | <i>Haemin-degrading [Methylobacillus flagellatus KT]637938516 YP_545713</i>                          |                      |                   |                 |                |            |                                               |                      |                   |                 |                |           |                        |  |                   |  |
| <b>MFLA1605</b> |                                                                                                      | 5.947                | 6.335             | 7.154           | -0.358         | Y ●●● Y    | 7.63 E-2                                      | 24.846               | 26.628            | 26.996          | -1.459         | Y ●●      |                        |  |                   |  |
|                 | <i>periplasmic binding protein [Methylobacillus flagellatus KT]637938517 YP_545714</i>               |                      |                   |                 |                |            |                                               |                      |                   |                 |                |           |                        |  |                   |  |
| <b>MFLA1606</b> |                                                                                                      | 0.000                | 0.000             |                 |                |            |                                               | 0.000                | 0.000             |                 |                |           |                        |  |                   |  |
|                 | <i>transport system permease protein [Methylobacillus flagellatus KT]637938518 YP_545715</i>         |                      |                   |                 |                |            |                                               |                      |                   |                 |                |           |                        |  |                   |  |
| <b>MFLA1607</b> |                                                                                                      | 2.418                | 3.162             | 3.837           | -0.834         | Y ●●● Y    | 7.36 E-2                                      | 20.463               | 21.312            | 21.949          | -0.881         | Y ●●      |                        |  |                   |  |
|                 | <i>ABC transporter related [Methylobacillus flagellatus KT]637938519 YP_545716</i>                   |                      |                   |                 |                |            |                                               |                      |                   |                 |                |           |                        |  |                   |  |
| <b>MFLA1608</b> |                                                                                                      | 0.000                | 0.000             |                 |                |            |                                               | 0.000                | 0.000             |                 |                |           |                        |  |                   |  |
|                 | <i>hypothetical protein [Methylobacillus flagellatus KT]637938520 YP_545717</i>                      |                      |                   |                 |                |            |                                               |                      |                   |                 |                |           |                        |  |                   |  |
| <b>MFLA1609</b> |                                                                                                      | 0.000                | 0.000             |                 |                |            |                                               | 0.000                | 0.000             |                 |                |           |                        |  |                   |  |
|                 | <i>hypothetical protein [Methylobacillus flagellatus KT]637938521 YP_545718</i>                      |                      |                   |                 |                |            |                                               |                      |                   |                 |                |           |                        |  |                   |  |
| <b>MFLA1610</b> |                                                                                                      | 0.000                | 0.000             |                 |                |            |                                               | 0.000                | 0.000             |                 |                |           |                        |  |                   |  |
|                 | <i>" Cupin 2, conserved barrel [Methylobacillus flagellatus KT]637938522 YP_545719 ""</i>            |                      |                   |                 |                |            |                                               |                      |                   |                 |                |           |                        |  |                   |  |
| <b>MFLA1611</b> |                                                                                                      | 3.804                | 3.750             | 4.777           | 0.027          | Y ●●● Y    | 1.7 E-1                                       | 22.629               | 22.779            | 23.706          | -0.187         | Y ●●      |                        |  |                   |  |
|                 | <i>protein of unknown function DUF152 [Methylobacillus flagellatus KT]637938523 YP_545720</i>        |                      |                   |                 |                |            |                                               |                      |                   |                 |                |           |                        |  |                   |  |
| <b>MFLA1612</b> |                                                                                                      | 2.328                | 2.649             | 3.497           | 0.994          | Y ●●● Y    | 1.55 E-1                                      | 22.353               | 22.882            | 23.641          | 0.626          | Y ●●      |                        |  |                   |  |
|                 | <i>" Pseudouridine synthase, RluD [Methylobacillus flagellatus KT]637938524 YP_545721 ""</i>         |                      |                   |                 |                |            |                                               |                      |                   |                 |                |           |                        |  |                   |  |
| <b>MFLA1613</b> |                                                                                                      | 5.050                | 4.202             | 5.687           | 0.813          | Y ●●● Y    | 5.33 E-2                                      | 23.488               | 23.919            | 24.720          | -0.415         | Y ●●      |                        |  |                   |  |
|                 | <i>putative competence lipoprotein precursor [Methylobacillus flagellatus KT]637938525 YP_545722</i> |                      |                   |                 |                |            |                                               |                      |                   |                 |                |           |                        |  |                   |  |
| <b>MFLA1614</b> |                                                                                                      | 6.825                | 6.483             | 7.664           | 0.305          | Y ●●● Y    | 2.77 E-1                                      | 25.956               | 25.965            | 26.961          | -0.096         | Y ●●      |                        |  |                   |  |
|                 | <i>Small GTP-binding protein domain [Methylobacillus flagellatus KT]637938526 YP_545723</i>          |                      |                   |                 |                |            |                                               |                      |                   |                 |                |           |                        |  |                   |  |
| <b>MFLA1615</b> | 1.43 E-3                                                                                             | 6.215                | 6.738             | 7.500           | -0.517         | G ●●● Y    | 2.42 E-1                                      | 26.203               | 26.248            | 27.225          | -0.032         | Y ●●      |                        |  |                   |  |
|                 | <i>Pyrrolo-quinoline quinone [Methylobacillus flagellatus KT]637938527 YP_545724</i>                 |                      |                   |                 |                |            |                                               |                      |                   |                 |                |           |                        |  |                   |  |
| <b>MFLA1616</b> | 0                                                                                                    | 7.311                | 4.771             | 7.540           | 2.570          | R ●●● Y    | 1.26 E-1                                      | 24.573               | 24.008            | 25.318          | 0.395          | R ●●      |                        |  |                   |  |
|                 | <i>hypothetical protein [Methylobacillus flagellatus KT]637938528 YP_545725</i>                      |                      |                   |                 |                |            |                                               |                      |                   |                 |                |           |                        |  |                   |  |
| <b>MFLA1617</b> |                                                                                                      | 4.591                | 5.104             | 5.870           | -0.449         | Y ●●● Y    | 8.22 E-2                                      | 23.831               | 24.240            | 25.050          | -0.395         | Y ●●      |                        |  |                   |  |
|                 | <i>ABC transporter related [Methylobacillus flagellatus KT]637938529 YP_545726</i>                   |                      |                   |                 |                |            |                                               |                      |                   |                 |                |           |                        |  |                   |  |
| <b>MFLA1618</b> |                                                                                                      | 3.398                | 4.219             | 4.866           | 0.203          | Y ●●● Y    | 1.06 E-1                                      | 21.923               | 23.683            | 24.056          | -0.722         | Y ●●      |                        |  |                   |  |
|                 | <i>ABC transporter related [Methylobacillus flagellatus KT]637938530 YP_545727</i>                   |                      |                   |                 |                |            |                                               |                      |                   |                 |                |           |                        |  |                   |  |

| ORF             | AM/OH <i>M. Flagellatus</i> Spectral Count                                                                         |                              |                           |                         |                        |            | AM/OH <i>M. Flagellatus</i> Protein Intensity |                              |                           |                         |                        |                        | Consensus | Spectral Count |   | Protein Intensity |  |
|-----------------|--------------------------------------------------------------------------------------------------------------------|------------------------------|---------------------------|-------------------------|------------------------|------------|-----------------------------------------------|------------------------------|---------------------------|-------------------------|------------------------|------------------------|-----------|----------------|---|-------------------|--|
|                 | q-value                                                                                                            | log <sub>2</sub> Methylamine | log <sub>2</sub> Methanol | log <sub>2</sub> Sc Sum | log <sub>2</sub> Ratio | Regulation | q-value                                       | log <sub>2</sub> Methylamine | log <sub>2</sub> Methanol | log <sub>2</sub> PI Sum | log <sub>2</sub> Ratio | Log <sub>2</sub> Ratio |           | -7             | 0 | 7                 |  |
| <b>MFLA1619</b> | 0                                                                                                                  | 7.914                        | 6.881                     | 8.488                   | 1.029                  | R ●●● Y    | 1.25 E-2                                      | 26.322                       | 26.991                    | 27.695                  | -0.683                 | Y ●●                   |           |                |   |                   |  |
|                 | <i>histidyl-tRNA synthetase [Methylobacillus flagellatus KT]637938531 YP_545728</i>                                |                              |                           |                         |                        |            |                                               |                              |                           |                         |                        |                        |           |                |   |                   |  |
| <b>MFLA1620</b> | 8.43 E-2                                                                                                           | 6.221                        | 6.074                     | 7.150                   | 0.139                  | Y ●●● Y    | 1.83 E-1                                      | 25.338                       | 25.503                    | 26.423                  | -0.229                 | Y ●●                   |           |                |   |                   |  |
|                 | <i>1-hydroxy-2-methyl-2-(E)-butenyl 4-diphosphate synthase [Methylobacillus flagellatus KT]637938532 YP_545729</i> |                              |                           |                         |                        |            |                                               |                              |                           |                         |                        |                        |           |                |   |                   |  |
| <b>MFLA1621</b> | 4.638                                                                                                              | 4.344                        | 5.499                     | 0.107                   | Y ●●● Y                | 1.29 E-1   | 24.790                                        | 25.326                       | 26.083                    | -0.914                  | Y ●●                   |                        |           |                |   |                   |  |
|                 | <i>hypothetical protein [Methylobacillus flagellatus KT]637938533 YP_545730</i>                                    |                              |                           |                         |                        |            |                                               |                              |                           |                         |                        |                        |           |                |   |                   |  |
| <b>MFLA1622</b> | 1.39 E-1                                                                                                           | 5.661                        | 5.456                     | 6.562                   | 0.206                  | Y ●●● Y    | 2.39 E-1                                      | 24.254                       | 24.331                    | 25.293                  | -0.105                 | Y ●●                   |           |                |   |                   |  |
|                 | <i>Tetratricopeptide TPR_2 [Methylobacillus flagellatus KT]637938534 YP_545731</i>                                 |                              |                           |                         |                        |            |                                               |                              |                           |                         |                        |                        |           |                |   |                   |  |
| <b>MFLA1623</b> |                                                                                                                    | 2.435                        | 2.435                     |                         |                        | Y ●●● Y    |                                               |                              | 21.762                    | 21.762                  |                        | Y ●●                   |           |                |   |                   |  |
|                 | <i>hypothetical protein [Methylobacillus flagellatus KT]637938535 YP_545732</i>                                    |                              |                           |                         |                        |            |                                               |                              |                           |                         |                        |                        |           |                |   |                   |  |
| <b>MFLA1624</b> | 1.07 E-11                                                                                                          | 8.832                        | 9.259                     | 10.061                  | -0.435                 | Y ●●● Y    | 4.79 E-2                                      | 28.518                       | 29.222                    | 29.912                  | -0.811                 | Y ●●                   |           |                |   |                   |  |
|                 | <i>Nucleoside-diphosphate kinase [Methylobacillus flagellatus KT]637938536 YP_545733</i>                           |                              |                           |                         |                        |            |                                               |                              |                           |                         |                        |                        |           |                |   |                   |  |
| <b>MFLA1625</b> | 4.025                                                                                                              | 4.919                        | 5.540                     | -0.960                  | Y ●●● Y                | 1.26 E-1   | 23.920                                        | 24.268                       | 25.105                    | -0.421                  | Y ●●                   |                        |           |                |   |                   |  |
|                 | <i>" RNA methyltransferase TrmH, group 3 [Methylobacillus flagellatus KT]637938537 YP_545734 ""</i>                |                              |                           |                         |                        |            |                                               |                              |                           |                         |                        |                        |           |                |   |                   |  |
| <b>MFLA1626</b> | 7.082                                                                                                              | 7.470                        | 8.289                     | -0.465                  | Y ●●● Y                | 4.65 E-2   | 25.882                                        | 26.343                       | 27.131                    | -0.498                  | Y ●●                   |                        |           |                |   |                   |  |
|                 | <i>Ribonuclease R [Methylobacillus flagellatus KT]637938538 YP_545735</i>                                          |                              |                           |                         |                        |            |                                               |                              |                           |                         |                        |                        |           |                |   |                   |  |
| <b>MFLA1627</b> | 0.000                                                                                                              | 0.000                        |                           |                         |                        | ●●●        | 0.000                                         | 0.000                        |                           |                         |                        | ●●                     |           |                |   |                   |  |
|                 | <i>hypothetical protein [Methylobacillus flagellatus KT]637938540 YP_545736</i>                                    |                              |                           |                         |                        |            |                                               |                              |                           |                         |                        |                        |           |                |   |                   |  |
| <b>MFLA1628</b> | 0.521                                                                                                              | 1.807                        | 2.303                     | -1.287                  | Y ●●● Y                |            | 20.854                                        | 22.674                       | 23.034                    | -1.821                  | Y ●●                   |                        |           |                |   |                   |  |
|                 | <i>hypothetical protein [Methylobacillus flagellatus KT]637938542 YP_545737</i>                                    |                              |                           |                         |                        |            |                                               |                              |                           |                         |                        |                        |           |                |   |                   |  |
| <b>MFLA1629</b> | 0.000                                                                                                              | 0.000                        |                           |                         |                        | ●●●        | 0.000                                         | 0.000                        |                           |                         |                        | ●●                     |           |                |   |                   |  |
|                 | <i>hypothetical protein [Methylobacillus flagellatus KT]637938543 YP_545738</i>                                    |                              |                           |                         |                        |            |                                               |                              |                           |                         |                        |                        |           |                |   |                   |  |
| <b>MFLA1630</b> | 0.000                                                                                                              | 0.000                        |                           |                         |                        | ●●●        | 0.000                                         | 0.000                        |                           |                         |                        | ●●                     |           |                |   |                   |  |
|                 | <i>outer membrane efflux protein [Methylobacillus flagellatus KT]637938544 YP_545739</i>                           |                              |                           |                         |                        |            |                                               |                              |                           |                         |                        |                        |           |                |   |                   |  |
| <b>MFLA1631</b> | 0.000                                                                                                              | 0.000                        |                           |                         |                        | ●●●        | 0.000                                         | 0.000                        |                           |                         |                        | ●●                     |           |                |   |                   |  |
|                 | <i>hypothetical protein [Methylobacillus flagellatus KT]637938545 YP_545740</i>                                    |                              |                           |                         |                        |            |                                               |                              |                           |                         |                        |                        |           |                |   |                   |  |
| <b>MFLA1632</b> | 0.000                                                                                                              | 0.000                        |                           |                         |                        | ●●●        | 0.000                                         | 0.000                        |                           |                         |                        | ●●                     |           |                |   |                   |  |
|                 | <i>acriflavin resistance protein [Methylobacillus flagellatus KT]637938546 YP_545741</i>                           |                              |                           |                         |                        |            |                                               |                              |                           |                         |                        |                        |           |                |   |                   |  |
| <b>MFLA1633</b> | 0.000                                                                                                              | 0.000                        |                           |                         |                        | ●●●        | 0.000                                         | 0.000                        |                           |                         |                        | ●●                     |           |                |   |                   |  |
|                 | <i>hypothetical protein [Methylobacillus flagellatus KT]637938547 YP_545742</i>                                    |                              |                           |                         |                        |            |                                               |                              |                           |                         |                        |                        |           |                |   |                   |  |
| <b>MFLA1634</b> | 0.000                                                                                                              | 0.000                        |                           |                         |                        | ●●●        | 0.000                                         | 0.000                        |                           |                         |                        | ●●                     |           |                |   |                   |  |
|                 | <i>small multidrug resistance protein [Methylobacillus flagellatus KT]637938548 YP_545743</i>                      |                              |                           |                         |                        |            |                                               |                              |                           |                         |                        |                        |           |                |   |                   |  |
| <b>MFLA1635</b> | 1.11 E-4                                                                                                           | 5.951                        | 5.075                     | 6.578                   | 0.900                  | R ●●● R    | 9.92 E-3                                      | 25.981                       | 24.619                    | 26.455                  | 1.359                  | R ●●                   |           |                |   |                   |  |
|                 | <i>membrane protein-like protein [Methylobacillus flagellatus KT]637938549 YP_545744</i>                           |                              |                           |                         |                        |            |                                               |                              |                           |                         |                        |                        |           |                |   |                   |  |
| <b>MFLA1636</b> | 5.064                                                                                                              | 3.820                        | 5.572                     | 1.173                   | Y ●●● Y                | 3.96 E-2   | 23.700                                        | 24.074                       | 24.899                    | -0.381                  | Y ●●                   |                        |           |                |   |                   |  |
|                 | <i>hypothetical protein [Methylobacillus flagellatus KT]637938550 YP_545745</i>                                    |                              |                           |                         |                        |            |                                               |                              |                           |                         |                        |                        |           |                |   |                   |  |
| <b>MFLA1637</b> | 2.746                                                                                                              | 4.012                        | 4.513                     | -1.550                  | Y ●●● G                | 8.35 E-3   | 22.127                                        | 23.387                       | 23.891                    | -1.269                  | G ●●                   |                        |           |                |   |                   |  |
|                 | <i>hypothetical protein [Methylobacillus flagellatus KT]637938551 YP_545746</i>                                    |                              |                           |                         |                        |            |                                               |                              |                           |                         |                        |                        |           |                |   |                   |  |
| <b>MFLA1638</b> | 1.28 E-1                                                                                                           | 5.530                        | 5.303                     | 6.421                   | 0.224                  | Y ●●● Y    | 2.42 E-1                                      | 24.265                       | 24.081                    | 25.176                  | -0.505                 | Y ●●                   |           |                |   |                   |  |
|                 | <i>type II secretion system protein [Methylobacillus flagellatus KT]637938552 YP_545747</i>                        |                              |                           |                         |                        |            |                                               |                              |                           |                         |                        |                        |           |                |   |                   |  |
| <b>MFLA1639</b> | 2.71 E-3                                                                                                           | 4.799                        | 5.628                     | 6.273                   | -0.820                 | G ●●● Y    | 1.66 E-2                                      | 24.202                       | 25.300                    | 25.853                  | -1.110                 | G ●●                   |           |                |   |                   |  |
|                 | <i>type II secretion system protein [Methylobacillus flagellatus KT]637938553 YP_545748</i>                        |                              |                           |                         |                        |            |                                               |                              |                           |                         |                        |                        |           |                |   |                   |  |
| <b>MFLA1640</b> | 1.58 E-2                                                                                                           | 6.807                        | 6.515                     | 7.668                   | 0.268                  | Y ●●● Y    | 3.74 E-2                                      | 25.378                       | 26.022                    | 26.735                  | -0.670                 | Y ●●                   |           |                |   |                   |  |
|                 | <i>type II secretion system protein E [Methylobacillus flagellatus KT]637938554 YP_545749</i>                      |                              |                           |                         |                        |            |                                               |                              |                           |                         |                        |                        |           |                |   |                   |  |

| ORF             | AM/OH <i>M. Flagellatus</i> Spectral Count                                                                                                                       |                              |                           |                         |                        | AM/OH <i>M. Flagellatus</i> Protein Intensity |          |                              |                           |                         | Spectral Count         |           | Protein Intensity |  | Log <sub>2</sub> Ratio |
|-----------------|------------------------------------------------------------------------------------------------------------------------------------------------------------------|------------------------------|---------------------------|-------------------------|------------------------|-----------------------------------------------|----------|------------------------------|---------------------------|-------------------------|------------------------|-----------|-------------------|--|------------------------|
|                 | q-value                                                                                                                                                          | log <sub>2</sub> Methylamine | log <sub>2</sub> Methanol | log <sub>2</sub> Sc Sum | log <sub>2</sub> Ratio | Regulation                                    | q-value  | log <sub>2</sub> Methylamine | log <sub>2</sub> Methanol | log <sub>2</sub> PI Sum | log <sub>2</sub> Ratio | Consensus |                   |  |                        |
| <b>MFLA1641</b> | 2.05 E-5                                                                                                                                                         | 7.879                        | 8.292                     | 9.100                   | -0.408                 | Y ●● Y                                        | 6.47 E-2 | 27.776                       | 28.321                    | 29.074                  | -0.576                 | Y ●       |                   |  |                        |
|                 | <i>pilus assembly protein CpaE [Methylobacillus flagellatus KT]637938555 YP_545750</i>                                                                           |                              |                           |                         |                        |                                               |          |                              |                           |                         |                        |           |                   |  |                        |
| <b>MFLA1642</b> | 0                                                                                                                                                                | 9.673                        | 8.660                     | 10.253                  | 0.987                  | R ●● Y                                        | 2.1 E-2  | 28.939                       | 28.399                    | 29.694                  | 0.534                  | R ●       |                   |  |                        |
|                 | <i>type II and III secretion system protein [Methylobacillus flagellatus KT]637938556 YP_545751</i>                                                              |                              |                           |                         |                        |                                               |          |                              |                           |                         |                        |           |                   |  |                        |
| <b>MFLA1643</b> | 6.038                                                                                                                                                            | 6.505                        | 7.290                     | 7.290                   | -0.667                 | Y ●● Y                                        | 2.87 E-2 | 25.991                       | 26.672                    | 27.371                  | -0.715                 | Y ●       |                   |  |                        |
|                 | <i>Flp pilus assembly CpaB [Methylobacillus flagellatus KT]637938557 YP_545752</i>                                                                               |                              |                           |                         |                        |                                               |          |                              |                           |                         |                        |           |                   |  |                        |
| <b>MFLA1644</b> | 1.398                                                                                                                                                            | 2.170                        | 2.835                     | 2.835                   | -0.772                 | Y ●● Y                                        |          | 21.768                       | 22.407                    | 23.122                  | -0.639                 | Y ●       |                   |  |                        |
|                 | <i>TadE-like protein [Methylobacillus flagellatus KT]637938558 YP_545753</i>                                                                                     |                              |                           |                         |                        |                                               |          |                              |                           |                         |                        |           |                   |  |                        |
| <b>MFLA1645</b> | 0.000                                                                                                                                                            | 0.000                        |                           |                         |                        | ●●                                            |          | 0.000                        | 0.000                     |                         |                        | ●         |                   |  |                        |
|                 | <i>"peptidase A24A, prepilin type IV [Methylobacillus flagellatus KT]637938559 YP_545754 ""</i>                                                                  |                              |                           |                         |                        |                                               |          |                              |                           |                         |                        |           |                   |  |                        |
| <b>MFLA1646</b> | 4.347                                                                                                                                                            | 5.036                        | 5.732                     | 5.732                   | -0.749                 | Y ●● Y                                        | 2.02 E-1 | 23.342                       | 23.190                    | 24.268                  | 0.227                  | Y ●       |                   |  |                        |
|                 | <i>transcriptional coactivator/pterin dehydratase [Methylobacillus flagellatus KT]637938560 YP_545755</i>                                                        |                              |                           |                         |                        |                                               |          |                              |                           |                         |                        |           |                   |  |                        |
| <b>MFLA1647</b> | 6.575                                                                                                                                                            | 5.737                        | 7.216                     | 7.216                   | 0.580                  | Y ●● Y                                        | 1.14 E-1 | 24.713                       | 25.021                    | 25.875                  | -0.267                 | Y ●       |                   |  |                        |
|                 | <i>aspartate/glutamate/uridylylase kinase [Methylobacillus flagellatus KT]637938561 YP_545756</i>                                                                |                              |                           |                         |                        |                                               |          |                              |                           |                         |                        |           |                   |  |                        |
| <b>MFLA1648</b> | 4.933                                                                                                                                                            | 4.924                        | 5.928                     | 5.928                   | 0.016                  | Y ●● Y                                        | 2.27 E-1 | 23.457                       | 23.640                    | 24.552                  | -0.262                 | Y ●       |                   |  |                        |
|                 | <i>"para-aminobenzoate synthase, component I [Methylobacillus flagellatus KT]637938562 YP_545757 ""</i>                                                          |                              |                           |                         |                        |                                               |          |                              |                           |                         |                        |           |                   |  |                        |
| <b>MFLA1649</b> | 4.49 E-2                                                                                                                                                         | 5.110                        | 5.447                     | 6.288                   | -0.399                 | Y ●● G                                        | 4.58 E-3 | 23.353                       | 24.151                    | 24.806                  | -0.800                 | G ●       |                   |  |                        |
|                 | <i>"S-layer protein, putative [Methylobacillus flagellatus KT]637938563 YP_545758 ""</i>                                                                         |                              |                           |                         |                        |                                               |          |                              |                           |                         |                        |           |                   |  |                        |
| <b>MFLA1650</b> |                                                                                                                                                                  | 1.346                        | 1.346                     |                         |                        | Y ●● Y                                        |          |                              | 18.789                    | 18.789                  |                        | Y ●       |                   |  |                        |
|                 | <i>protein of unknown function DUF201 [Methylobacillus flagellatus KT]637938564 YP_545759</i>                                                                    |                              |                           |                         |                        |                                               |          |                              |                           |                         |                        |           |                   |  |                        |
| <b>MFLA1651</b> |                                                                                                                                                                  | 2.095                        | 2.095                     |                         |                        | Y ●● Y                                        |          |                              | 21.131                    | 21.131                  |                        | Y ●       |                   |  |                        |
|                 | <i>histidine biosynthesis [Methylobacillus flagellatus KT]637938565 YP_545760</i>                                                                                |                              |                           |                         |                        |                                               |          |                              |                           |                         |                        |           |                   |  |                        |
| <b>MFLA1652</b> | 0                                                                                                                                                                | 9.866                        | 10.260                    | 11.077                  | -0.380                 | Y ●● Y                                        | 8.58 E-2 | 30.470                       | 31.102                    | 31.820                  | -0.559                 | Y ●       |                   |  |                        |
|                 | <i>formaldehyde-activating enzyme [Methylobacillus flagellatus KT]637938566 YP_545761</i>                                                                        |                              |                           |                         |                        |                                               |          |                              |                           |                         |                        |           |                   |  |                        |
| <b>MFLA1653</b> | 7.931                                                                                                                                                            | 8.271                        | 9.111                     | 9.111                   | -0.302                 | Y ●● Y                                        | 2.28 E-2 | 28.559                       | 29.413                    | 30.049                  | -0.882                 | Y ●       |                   |  |                        |
|                 | <i>sugar isomerase (SIS) [Methylobacillus flagellatus KT]637938567 YP_545762</i>                                                                                 |                              |                           |                         |                        |                                               |          |                              |                           |                         |                        |           |                   |  |                        |
| <b>MFLA1654</b> | 0                                                                                                                                                                | 11.036                       | 11.572                    | 12.329                  | -0.548                 | G ●● Y                                        | 9.62 E-2 | 32.621                       | 32.881                    | 33.757                  | -0.251                 | G ●       |                   |  |                        |
|                 | <i>Orotidine 5'-phosphate decarboxylase [Methylobacillus flagellatus KT]637938568 YP_545763</i>                                                                  |                              |                           |                         |                        |                                               |          |                              |                           |                         |                        |           |                   |  |                        |
| <b>MFLA1655</b> | 10.396                                                                                                                                                           | 10.951                       | 11.700                    | 11.700                  | -0.642                 | Y ●● G                                        | 4.58 E-3 | 31.060                       | 32.157                    | 32.710                  | -1.105                 | G ●       |                   |  |                        |
|                 | <i>transaldolase [Methylobacillus flagellatus KT]637938569 YP_545764</i>                                                                                         |                              |                           |                         |                        |                                               |          |                              |                           |                         |                        |           |                   |  |                        |
| <b>MFLA1656</b> |                                                                                                                                                                  | 2.095                        | 2.095                     |                         |                        | Y ●● Y                                        |          |                              | 21.262                    | 21.262                  |                        | Y ●       |                   |  |                        |
|                 | <i>triphosphoribosyl-dephospho-CoA protein [Methylobacillus flagellatus KT]637938570 YP_545765</i>                                                               |                              |                           |                         |                        |                                               |          |                              |                           |                         |                        |           |                   |  |                        |
| <b>MFLA1657</b> | 2.691                                                                                                                                                            | 1.915                        | 3.354                     | 3.354                   | 1.856                  | Y ●● Y                                        | 1.77 E-1 | 19.253                       | 21.026                    | 21.396                  | -0.433                 | Y ●       |                   |  |                        |
|                 | <i>S6 modification enzyme RimK [Methylobacillus flagellatus KT]637938571 YP_545766</i>                                                                           |                              |                           |                         |                        |                                               |          |                              |                           |                         |                        |           |                   |  |                        |
| <b>MFLA1658</b> | 0                                                                                                                                                                | 8.501                        | 9.398                     | 10.018                  | -0.888                 | G ●● Y                                        | 5.48 E-2 | 28.507                       | 29.418                    | 30.033                  | -1.126                 | G ●       |                   |  |                        |
|                 | <i>Methenyltetrahydromethanopterin cyclohydrolase [Methylobacillus flagellatus KT]637938572 YP_545767</i>                                                        |                              |                           |                         |                        |                                               |          |                              |                           |                         |                        |           |                   |  |                        |
| <b>MFLA1659</b> | 4.323                                                                                                                                                            | 3.778                        | 5.076                     | 5.076                   | 0.171                  | Y ●● Y                                        | 1.41 E-1 | 23.096                       | 22.549                    | 23.848                  | 0.320                  | Y ●       |                   |  |                        |
|                 | <i>protein of unknown function DUF201 [Methylobacillus flagellatus KT]637938573 YP_545768</i>                                                                    |                              |                           |                         |                        |                                               |          |                              |                           |                         |                        |           |                   |  |                        |
| <b>MFLA1660</b> | 5.32 E-13                                                                                                                                                        | 9.512                        | 9.872                     | 10.703                  | -0.352                 | Y ●● Y                                        | 2.94 E-2 | 29.078                       | 29.719                    | 30.434                  | -0.627                 | Y ●       |                   |  |                        |
|                 | <i>"methylene tetrahydromethanopterin dehydrogenase/methylenetetrahydrofolate dehydrogenase, putative [Methylobacillus flagellatus KT]637938574 YP_545769 ""</i> |                              |                           |                         |                        |                                               |          |                              |                           |                         |                        |           |                   |  |                        |
| <b>MFLA1661</b> | 0                                                                                                                                                                | 6.150                        | 7.503                     | 7.980                   | -1.353                 | G ●● Y                                        | 2.29 E-2 | 24.147                       | 25.131                    | 25.721                  | -1.077                 | G ●       |                   |  |                        |
|                 | <i>GHMP kinase group 1 [Methylobacillus flagellatus KT]637938575 YP_545770</i>                                                                                   |                              |                           |                         |                        |                                               |          |                              |                           |                         |                        |           |                   |  |                        |
| <b>MFLA1662</b> | 7.380                                                                                                                                                            | 7.550                        | 8.467                     | 8.467                   | -0.140                 | Y ●● G                                        | 8.64 E-3 | 25.900                       | 27.356                    | 27.805                  | -1.493                 | G ●       |                   |  |                        |
|                 | <i>formylmethanofuran dehydrogenase [Methylobacillus flagellatus KT]637938576 YP_545771</i>                                                                      |                              |                           |                         |                        |                                               |          |                              |                           |                         |                        |           |                   |  |                        |

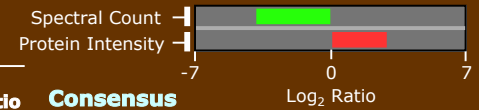

**AM/OH M Flagellatus Spectral Count**

**AM/OH M Flagellatus Protein Intensity**

| ORF                                                                                                                        | $\alpha$ -value | log <sub>2</sub> Methylamine | log <sub>2</sub> Methanol | log <sub>2</sub> Sc Sum | log <sub>2</sub> Ratio | Regulation | $\alpha$ -value | log <sub>2</sub> Methylamine | log <sub>2</sub> Methanol | log <sub>2</sub> PI Sum | log <sub>2</sub> Ratio | Consensus | Log <sub>2</sub> Ratio |
|----------------------------------------------------------------------------------------------------------------------------|-----------------|------------------------------|---------------------------|-------------------------|------------------------|------------|-----------------|------------------------------|---------------------------|-------------------------|------------------------|-----------|------------------------|
| <b>MFLA1663</b>                                                                                                            | 2.48 E-4        | 8.715                        | 8.461                     | 9.594                   | 0.265                  | Y ● ● G    | 6.36 E-3        | 28.144                       | 28.841                    | 29.534                  | -0.697                 | Y ●       |                        |
| <i>Amidohydrolyase 3 [Methylobacillus flagellatus KT]637938577 YP_545772</i>                                               |                 |                              |                           |                         |                        |            |                 |                              |                           |                         |                        |           |                        |
| <b>MFLA1664</b>                                                                                                            | 5.14 E-2        | 7.499                        | 7.349                     | 8.426                   | 0.163                  | Y ● ● Y    | 9.14 E-2        | 27.446                       | 27.662                    | 28.558                  | -0.221                 | Y ●       |                        |
| <i>Formylmethanofuran--tetrahydromethanopterin N-formyltransferase [Methylobacillus flagellatus KT]637938578 YP_545773</i> |                 |                              |                           |                         |                        |            |                 |                              |                           |                         |                        |           |                        |
| <b>MFLA1665</b>                                                                                                            | 0               | 9.169                        | 8.546                     | 9.891                   | 0.624                  | R ● ● Y    | 8.8 E-2         | 27.475                       | 27.659                    | 28.570                  | -0.191                 | Y ●       |                        |
| <i>Formylmethanofuran dehydrogenase [Methylobacillus flagellatus KT]637938579 YP_545774</i>                                |                 |                              |                           |                         |                        |            |                 |                              |                           |                         |                        |           |                        |
| <b>MFLA1666</b>                                                                                                            | 6.587           | 6.166                        | 7.392                     | 0.217                   | Y ● ● Y                | 1.16 E-1   | 26.686          | 26.959                       | 27.829                    | -0.282                  | Y ●                    |           |                        |
| <i>OmpA/MotB [Methylobacillus flagellatus KT]637938580 YP_545775</i>                                                       |                 |                              |                           |                         |                        |            |                 |                              |                           |                         |                        |           |                        |
| <b>MFLA1667</b>                                                                                                            | 1.521           | 1.184                        | 2.362                     | 1.347                   | Y ● ● Y                | 1.87 E-1   | 19.992          | 21.583                       | 21.997                    | -0.311                  | Y ●                    |           |                        |
| <i>protein of unknown function UPF0029 [Methylobacillus flagellatus KT]637938581 YP_545776</i>                             |                 |                              |                           |                         |                        |            |                 |                              |                           |                         |                        |           |                        |
| <b>MFLA1668</b>                                                                                                            | 1.95 E-2        | 6.075                        | 5.704                     | 6.901                   | 0.365                  | Y ● ● Y    | 2 E-1           | 25.195                       | 25.104                    | 26.150                  | 0.094                  | Y ●       |                        |
| <i>" protein of unknown function DUF853, NPT hydrolase putative [Methylobacillus flagellatus KT]637938582 YP_545777 ""</i> |                 |                              |                           |                         |                        |            |                 |                              |                           |                         |                        |           |                        |
| <b>MFLA1669</b>                                                                                                            | 4.956           | 4.545                        | 5.765                     | 0.422                   | Y ● ● Y                | 2.32 E-1   | 23.848          | 24.018                       | 24.935                    | -0.270                  | Y ●                    |           |                        |
| <i>" transcriptional regulator, LysR family [Methylobacillus flagellatus KT]637938583 YP_545778 ""</i>                     |                 |                              |                           |                         |                        |            |                 |                              |                           |                         |                        |           |                        |
| <b>MFLA1670</b>                                                                                                            | 0.000           | 0.000                        |                           |                         |                        |            | 0.000           | 0.000                        |                           |                         |                        |           |                        |
| <i>protein of unknown function DUF81 [Methylobacillus flagellatus KT]637938584 YP_545779</i>                               |                 |                              |                           |                         |                        |            |                 |                              |                           |                         |                        |           |                        |
| <b>MFLA1671</b>                                                                                                            | 9.25 E-5        | 6.543                        | 7.145                     | 7.875                   | -0.606                 | G ● ● Y    | 8.22 E-2        | 26.313                       | 26.836                    | 27.598                  | -0.566                 | G ●       |                        |
| <i>nitrite and sulphite reductase 4Fe-4S region [Methylobacillus flagellatus KT]637938585 YP_545780</i>                    |                 |                              |                           |                         |                        |            |                 |                              |                           |                         |                        |           |                        |
| <b>MFLA1672</b>                                                                                                            | 9.72 E-2        | 5.916                        | 6.189                     | 7.059                   | -0.275                 | Y ● ● Y    | 9.23 E-2        | 25.304                       | 25.727                    | 26.531                  | -0.502                 | Y ●       |                        |
| <i>Uncharacterised conserved protein UCP030820 [Methylobacillus flagellatus KT]637938586 YP_545781</i>                     |                 |                              |                           |                         |                        |            |                 |                              |                           |                         |                        |           |                        |
| <b>MFLA1673</b>                                                                                                            | 10 E-2          | 6.663                        | 6.787                     | 7.726                   | -0.137                 | Y ● ● Y    | 2.7 E-2         | 25.754                       | 26.607                    | 27.243                  | -0.829                 | Y ●       |                        |
| <i>" Sulfate adenylyltransferase, small subunit [Methylobacillus flagellatus KT]637938587 YP_545782 ""</i>                 |                 |                              |                           |                         |                        |            |                 |                              |                           |                         |                        |           |                        |
| <b>MFLA1674</b>                                                                                                            | 5.29 E-10       | 7.151                        | 7.858                     | 8.547                   | -0.706                 | G ● ● Y    | 3.18 E-2        | 26.634                       | 27.251                    | 27.975                  | -0.658                 | G ●       |                        |
| <i>" Sulfate adenylyltransferase, large subunit [Methylobacillus flagellatus KT]637938588 YP_545783 ""</i>                 |                 |                              |                           |                         |                        |            |                 |                              |                           |                         |                        |           |                        |
| <b>MFLA1675</b>                                                                                                            | 3.38 E-14       | 6.052                        | 4.143                     | 6.393                   | 1.745                  | R ● ● Y    | 2.62 E-1        | 25.256                       | 25.315                    | 26.286                  | -0.318                 | Y ●       |                        |
| <i>" 4Fe-4S ferredoxin, iron-sulfur binding [Methylobacillus flagellatus KT]637938589 YP_545784 ""</i>                     |                 |                              |                           |                         |                        |            |                 |                              |                           |                         |                        |           |                        |
| <b>MFLA1676</b>                                                                                                            | 5.836           | 6.304                        | 7.089                     | -0.379                  | Y ● ● Y                | 2.02 E-1   | 25.266          | 25.429                       | 26.350                    | -0.187                  | Y ●                    |           |                        |
| <i>short-chain alcohol dehydrogenase [Methylobacillus flagellatus KT]637938590 YP_545785</i>                               |                 |                              |                           |                         |                        |            |                 |                              |                           |                         |                        |           |                        |
| <b>MFLA1677</b>                                                                                                            | 0.000           | 0.000                        |                           |                         |                        |            | 0.000           | 0.000                        |                           |                         |                        |           |                        |
| <i>Drug resistance transporter Bcr/CfIA subfamily [Methylobacillus flagellatus KT]637938591 YP_545786</i>                  |                 |                              |                           |                         |                        |            |                 |                              |                           |                         |                        |           |                        |
| <b>MFLA1678</b>                                                                                                            | 9.29 E-5        | 5.508                        | 4.497                     | 6.089                   | 0.958                  | R ● ● Y    | 1.83 E-1        | 24.882                       | 24.564                    | 25.732                  | 0.243                  | R ●       |                        |
| <i>Cyclopropane-fatty-acyl-phospholipid synthase [Methylobacillus flagellatus KT]637938592 YP_545787</i>                   |                 |                              |                           |                         |                        |            |                 |                              |                           |                         |                        |           |                        |
| <b>MFLA1679</b>                                                                                                            | 3.34 E-2        | 5.789                        | 6.112                     | 6.960                   | -0.316                 | Y ● ● Y    | 1.12 E-2        | 24.786                       | 26.114                    | 26.598                  | -1.405                 | Y ●       |                        |
| <i>phosphoadenosine phosphosulfate reductase [Methylobacillus flagellatus KT]637938593 YP_545788</i>                       |                 |                              |                           |                         |                        |            |                 |                              |                           |                         |                        |           |                        |
| <b>MFLA1680</b>                                                                                                            | 4.424           | 4.450                        | 5.437                     | 0.008                   | Y ● ● Y                | 3.22 E-2   | 22.617          | 23.380                       | 24.049                    | -0.783                  | Y ●                    |           |                        |
| <i>Coenzyme PQQ biosynthesis protein E [Methylobacillus flagellatus KT]637938594 YP_545789</i>                             |                 |                              |                           |                         |                        |            |                 |                              |                           |                         |                        |           |                        |
| <b>MFLA1681</b>                                                                                                            | 1.843           | 3.441                        | 3.852                     | -0.577                  | Y ● ● Y                | 8.26 E-2   | 21.655          | 23.367                       | 23.751                    | -0.698                  | Y ●                    |           |                        |
| <i>coenzyme PQQ synthesis D [Methylobacillus flagellatus KT]637938595 YP_545790</i>                                        |                 |                              |                           |                         |                        |            |                 |                              |                           |                         |                        |           |                        |
| <b>MFLA1682</b>                                                                                                            | 3.73 E-15       | 6.033                        | 7.086                     | 7.653                   | -1.249                 | G ● ● Y    | 1.29 E-2        | 23.162                       | 25.114                    | 25.446                  | -2.391                 | G ●       |                        |
| <i>Coenzyme PQQ biosynthesis protein C [Methylobacillus flagellatus KT]637938596 YP_545791</i>                             |                 |                              |                           |                         |                        |            |                 |                              |                           |                         |                        |           |                        |
| <b>MFLA1683</b>                                                                                                            | 4.240           | 4.957                        | 5.643                     | -0.836                  | Y ● ● Y                | 4.26 E-2   | 23.480          | 24.787                       | 25.276                    | -1.608                  | Y ●                    |           |                        |
| <i>Coenzyme PQQ biosynthesis protein B [Methylobacillus flagellatus KT]637938597 YP_545792</i>                             |                 |                              |                           |                         |                        |            |                 |                              |                           |                         |                        |           |                        |
| <b>MFLA1684</b>                                                                                                            | 1.03 E-2        | 6.183                        | 6.315                     | 7.250                   | -0.203                 | Y ● ● Y    | 9.62 E-2        | 25.204                       | 25.633                    | 26.434                  | -0.514                 | Y ●       |                        |
| <i>histidinol-phosphate aminotransferase [Methylobacillus flagellatus KT]637938598 YP_545793</i>                           |                 |                              |                           |                         |                        |            |                 |                              |                           |                         |                        |           |                        |

| ORF             | AM/OH <i>M. Flagellatus</i> Spectral Count                                                                                         |                              |                           |                         |                        | AM/OH <i>M. Flagellatus</i> Protein Intensity |                 |                              |                           |                         | Spectral Count         |           | Protein Intensity      |  |  |
|-----------------|------------------------------------------------------------------------------------------------------------------------------------|------------------------------|---------------------------|-------------------------|------------------------|-----------------------------------------------|-----------------|------------------------------|---------------------------|-------------------------|------------------------|-----------|------------------------|--|--|
|                 | <i>q</i> -value                                                                                                                    | log <sub>2</sub> Methylamine | log <sub>2</sub> Methanol | log <sub>2</sub> Sc Sum | log <sub>2</sub> Ratio | Regulation                                    | <i>q</i> -value | log <sub>2</sub> Methylamine | log <sub>2</sub> Methanol | log <sub>2</sub> PI Sum | log <sub>2</sub> Ratio | Consensus | Log <sub>2</sub> Ratio |  |  |
| <b>MFLA1685</b> |                                                                                                                                    | 3.482                        | 4.407                     | 5.018                   | -0.761                 | Y ●●● Y                                       | 1.24 E-2        | 22.831                       | 23.877                    | 24.447                  | -1.056                 | Y ●●      |                        |  |  |
|                 | <i>diguanylate cyclase (GGDEF domain) [Methylobacillus flagellatus KT]637938599 YP_545794</i>                                      |                              |                           |                         |                        |                                               |                 |                              |                           |                         |                        |           |                        |  |  |
| <b>MFLA1686</b> | 3.7 E-3                                                                                                                            | 5.697                        | 6.222                     | 6.983                   | -0.572                 | G ●●● Y                                       | 3.1 E-2         | 24.437                       | 24.799                    | 25.629                  | -0.355                 | G ●●      |                        |  |  |
|                 | <i>chorismate mutase [Methylobacillus flagellatus KT]637938600 YP_545795</i>                                                       |                              |                           |                         |                        |                                               |                 |                              |                           |                         |                        |           |                        |  |  |
| <b>MFLA1687</b> | 4.57 E-3                                                                                                                           | 4.918                        | 5.632                     | 6.319                   | -0.723                 | G ●●● G                                       | 7.38 E-3        | 24.219                       | 25.420                    | 25.941                  | -1.223                 | G ●●      |                        |  |  |
|                 | <i>phosphoserine aminotransferase [Methylobacillus flagellatus KT]637938601 YP_545796</i>                                          |                              |                           |                         |                        |                                               |                 |                              |                           |                         |                        |           |                        |  |  |
| <b>MFLA1688</b> | 3.82 E-2                                                                                                                           | 7.481                        | 7.704                     | 8.597                   | -0.226                 | Y ●●● Y                                       | 1.11 E-2        | 26.779                       | 27.469                    | 28.165                  | -0.686                 | Y ●●      |                        |  |  |
|                 | <i>" DNA gyrase, A subunit [Methylobacillus flagellatus KT]637938602 YP_545797 ""</i>                                              |                              |                           |                         |                        |                                               |                 |                              |                           |                         |                        |           |                        |  |  |
| <b>MFLA1689</b> |                                                                                                                                    | 8.046                        | 8.069                     | 9.057                   | -0.156                 | Y ●●● Y                                       | 1.33 E-1        | 29.247                       | 29.016                    | 30.136                  | 0.193                  | Y ●●      |                        |  |  |
|                 | <i>alkyl hydroperoxide reductase/ Thiol specific antioxidant/ Mal allergen [Methylobacillus flagellatus KT]637938603 YP_545798</i> |                              |                           |                         |                        |                                               |                 |                              |                           |                         |                        |           |                        |  |  |
| <b>MFLA1690</b> | 1.19 E-2                                                                                                                           | 7.202                        | 7.424                     | 8.317                   | -0.246                 | Y ●●● Y                                       | 1.03 E-2        | 27.471                       | 28.123                    | 28.833                  | -0.659                 | Y ●●      |                        |  |  |
|                 | <i>hypothetical protein [Methylobacillus flagellatus KT]637938604 YP_545799</i>                                                    |                              |                           |                         |                        |                                               |                 |                              |                           |                         |                        |           |                        |  |  |
| <b>MFLA1691</b> | 4.63 E-2                                                                                                                           | 6.387                        | 6.520                     | 7.455                   | -0.109                 | Y ●●● Y                                       | 2.74 E-2        | 25.420                       | 26.278                    | 26.912                  | -0.911                 | Y ●●      |                        |  |  |
|                 | <i>O-succinylhomoserine sulfhydrylase [Methylobacillus flagellatus KT]637938605 YP_545800</i>                                      |                              |                           |                         |                        |                                               |                 |                              |                           |                         |                        |           |                        |  |  |
| <b>MFLA1692</b> | 3.88 E-13                                                                                                                          | 6.550                        | 7.515                     | 8.112                   | -0.992                 | G ●●● G                                       | 8.91 E-3        | 25.953                       | 27.120                    | 27.651                  | -1.164                 | G ●●      |                        |  |  |
|                 | <i>amidophosphoribosyltransferase [Methylobacillus flagellatus KT]637938606 YP_545801</i>                                          |                              |                           |                         |                        |                                               |                 |                              |                           |                         |                        |           |                        |  |  |
| <b>MFLA1693</b> |                                                                                                                                    | 0.000                        | 0.000                     |                         |                        | ●●●                                           |                 | 0.000                        | 0.000                     |                         |                        | ●●        |                        |  |  |
|                 | <i>Colicin V production protein [Methylobacillus flagellatus KT]637938607 YP_545802</i>                                            |                              |                           |                         |                        |                                               |                 |                              |                           |                         |                        |           |                        |  |  |
| <b>MFLA1694</b> |                                                                                                                                    | 2.328                        | 2.170                     | 3.251                   | 0.158                  | Y ●●● Y                                       |                 | 19.835                       | 20.589                    | 21.260                  | -0.754                 | Y ●●      |                        |  |  |
|                 | <i>Sporulation related [Methylobacillus flagellatus KT]637938608 YP_545803</i>                                                     |                              |                           |                         |                        |                                               |                 |                              |                           |                         |                        |           |                        |  |  |
| <b>MFLA1695</b> |                                                                                                                                    | 3.763                        | 3.705                     | 4.734                   | -0.060                 | Y ●●● Y                                       | 2.3 E-1         | 22.756                       | 22.571                    | 23.667                  | 0.073                  | Y ●●      |                        |  |  |
|                 | <i>FoIc bifunctional protein [Methylobacillus flagellatus KT]637938609 YP_545804</i>                                               |                              |                           |                         |                        |                                               |                 |                              |                           |                         |                        |           |                        |  |  |
| <b>MFLA1696</b> | 1.97 E-2                                                                                                                           | 5.593                        | 5.347                     | 6.475                   | 0.355                  | Y ●●● Y                                       | 9.44 E-2        | 25.245                       | 24.604                    | 25.960                  | 0.798                  | Y ●●      |                        |  |  |
|                 | <i>" acetyl-CoA carboxylase, carboxyl transferase, beta subunit [Methylobacillus flagellatus KT]637938610 YP_545805 ""</i>         |                              |                           |                         |                        |                                               |                 |                              |                           |                         |                        |           |                        |  |  |
| <b>MFLA1697</b> |                                                                                                                                    | 6.385                        | 6.626                     | 7.510                   | -0.258                 | Y ●●● Y                                       | 6.85 E-2        | 25.887                       | 26.162                    | 27.031                  | -0.269                 | Y ●●      |                        |  |  |
|                 | <i>" tryptophan synthase, alpha subunit [Methylobacillus flagellatus KT]637938611 YP_545806 ""</i>                                 |                              |                           |                         |                        |                                               |                 |                              |                           |                         |                        |           |                        |  |  |
| <b>MFLA1698</b> |                                                                                                                                    | 6.475                        | 6.776                     | 7.633                   | -0.192                 | Y ●●● Y                                       | 1.29 E-1        | 26.196                       | 26.424                    | 27.315                  | -0.237                 | Y ●●      |                        |  |  |
|                 | <i>" tryptophan synthase, beta subunit [Methylobacillus flagellatus KT]637938612 YP_545807 ""</i>                                  |                              |                           |                         |                        |                                               |                 |                              |                           |                         |                        |           |                        |  |  |
| <b>MFLA1699</b> |                                                                                                                                    | 0.000                        | 0.000                     |                         |                        | ●●●                                           |                 | 0.000                        | 0.000                     |                         |                        | ●●        |                        |  |  |
|                 | <i>Phosphoribosylanthranilate isomerase [Methylobacillus flagellatus KT]637938613 YP_545808</i>                                    |                              |                           |                         |                        |                                               |                 |                              |                           |                         |                        |           |                        |  |  |
| <b>MFLA1700</b> |                                                                                                                                    | 3.259                        | 2.966                     | 4.120                   | 0.286                  | Y ●●● Y                                       | 7.05 E-2        | 21.153                       | 21.986                    | 22.629                  | -0.759                 | Y ●●      |                        |  |  |
|                 | <i>tRNA pseudouridine synthase A [Methylobacillus flagellatus KT]637938614 YP_545809</i>                                           |                              |                           |                         |                        |                                               |                 |                              |                           |                         |                        |           |                        |  |  |
| <b>MFLA1701</b> | 8.26 E-12                                                                                                                          | 7.658                        | 8.238                     | 8.977                   | -0.630                 | G ●●● G                                       | 4.1 E-3         | 27.148                       | 27.702                    | 28.452                  | -0.555                 | G ●●      |                        |  |  |
|                 | <i>hypothetical protein [Methylobacillus flagellatus KT]637938615 YP_545810</i>                                                    |                              |                           |                         |                        |                                               |                 |                              |                           |                         |                        |           |                        |  |  |
| <b>MFLA1702</b> | 1.27 E-2                                                                                                                           | 7.021                        | 6.843                     | 7.935                   | 0.158                  | Y ●●● Y                                       | 1.08 E-2        | 25.957                       | 26.399                    | 27.195                  | -0.446                 | Y ●●      |                        |  |  |
|                 | <i>aspartate-semialdehyde dehydrogenase [Methylobacillus flagellatus KT]637938616 YP_545811</i>                                    |                              |                           |                         |                        |                                               |                 |                              |                           |                         |                        |           |                        |  |  |
| <b>MFLA1703</b> | 1.84 E-2                                                                                                                           | 7.645                        | 7.503                     | 8.576                   | 0.120                  | Y ●●● Y                                       | 2.22 E-1        | 26.747                       | 26.670                    | 27.709                  | 0.079                  | Y ●●      |                        |  |  |
|                 | <i>3-isopropylmalate dehydrogenase [Methylobacillus flagellatus KT]637938617 YP_545812</i>                                         |                              |                           |                         |                        |                                               |                 |                              |                           |                         |                        |           |                        |  |  |
| <b>MFLA1704</b> | 2.75 E-8                                                                                                                           | 6.813                        | 7.558                     | 8.233                   | -0.745                 | G ●●● Y                                       | 2 E-1           | 26.441                       | 26.555                    | 27.499                  | -0.117                 | G ●●      |                        |  |  |
|                 | <i>" 3-isopropylmalate dehydratase, small subunit [Methylobacillus flagellatus KT]637938618 YP_545813 ""</i>                       |                              |                           |                         |                        |                                               |                 |                              |                           |                         |                        |           |                        |  |  |
| <b>MFLA1705</b> | 2.82 E-6                                                                                                                           | 7.112                        | 6.444                     | 7.817                   | 0.658                  | R ●●● Y                                       | 2.01 E-2        | 26.978                       | 26.297                    | 27.677                  | 0.681                  | R ●●      |                        |  |  |
|                 | <i>" 3-isopropylmalate dehydratase, large subunit [Methylobacillus flagellatus KT]637938619 YP_545814 ""</i>                       |                              |                           |                         |                        |                                               |                 |                              |                           |                         |                        |           |                        |  |  |
| <b>MFLA1706</b> |                                                                                                                                    | 7.234                        | 6.521                     | 7.921                   | 0.630                  | Y ●●● Y                                       | 3.92 E-2        | 25.563                       | 25.143                    | 26.368                  | 0.415                  | Y ●●      |                        |  |  |
|                 | <i>protein of unknown function DUF520 [Methylobacillus flagellatus KT]637938620 YP_545815</i>                                      |                              |                           |                         |                        |                                               |                 |                              |                           |                         |                        |           |                        |  |  |



| ORF             | AM/OH <i>M. Flagellatus</i> Spectral Count                                                                    |                              |                           |                         |                        |            | AM/OH <i>M. Flagellatus</i> Protein Intensity |                              |                           |                         |                        |        | Consensus | Log <sub>2</sub> Ratio |
|-----------------|---------------------------------------------------------------------------------------------------------------|------------------------------|---------------------------|-------------------------|------------------------|------------|-----------------------------------------------|------------------------------|---------------------------|-------------------------|------------------------|--------|-----------|------------------------|
|                 | q-value                                                                                                       | log <sub>2</sub> Methylamine | log <sub>2</sub> Methanol | log <sub>2</sub> Sc Sum | log <sub>2</sub> Ratio | Regulation | q-value                                       | log <sub>2</sub> Methylamine | log <sub>2</sub> Methanol | log <sub>2</sub> PI Sum | log <sub>2</sub> Ratio |        |           |                        |
| <b>MFLA1707</b> | 3.14 E-2                                                                                                      | 4.135                        | 5.672                     | 6.099                   | -0.514                 | Y ●● Y     | 4.79 E-2                                      | 22.388                       | 24.440                    | 24.752                  | -1.049                 | Y ●    |           |                        |
|                 | protein of unknown function DUF1255 [Methylobacillus flagellatus KT]637938621 YP_545816                       |                              |                           |                         |                        |            |                                               |                              |                           |                         |                        |        |           |                        |
| <b>MFLA1708</b> | 8.11 E-7                                                                                                      | 8.162                        | 7.656                     | 8.931                   | 0.499                  | Y ●● Y     | 2.04 E-1                                      | 26.720                       | 26.920                    | 27.823                  | -0.385                 | Y ●    |           |                        |
|                 | Argininosuccinate synthase [Methylobacillus flagellatus KT]637938622 YP_545817                                |                              |                           |                         |                        |            |                                               |                              |                           |                         |                        |        |           |                        |
| <b>MFLA1709</b> |                                                                                                               | 7.100                        | 6.046                     | 7.667                   | 0.778                  | Y ●● Y     | 2.24 E-1                                      | 25.831                       | 25.611                    | 26.725                  | -0.137                 | Y ●    |           |                        |
|                 | ornithine carbamoyltransferase [Methylobacillus flagellatus KT]637938623 YP_545818                            |                              |                           |                         |                        |            |                                               |                              |                           |                         |                        |        |           |                        |
| <b>MFLA1710</b> | 1.8 E-2                                                                                                       | 6.733                        | 6.721                     | 7.727                   | -0.043                 | Y ●● Y     | 1.33 E-1                                      | 25.731                       | 25.865                    | 26.800                  | -0.150                 | Y ●    |           |                        |
|                 | acetylornithine and succinylornithine aminotransferases [Methylobacillus flagellatus KT]637938624 YP_545819   |                              |                           |                         |                        |            |                                               |                              |                           |                         |                        |        |           |                        |
| <b>MFLA1711</b> |                                                                                                               | 1.674                        | 2.739                     | 3.303                   | -1.071                 | Y ●● Y     | 4.59 E-2                                      | 21.184                       |                           | 21.771                  | 22.507                 | -0.646 | Y ●       |                        |
|                 | Rieske (2Fe-2S) region [Methylobacillus flagellatus KT]637938625 YP_545820                                    |                              |                           |                         |                        |            |                                               |                              |                           |                         |                        |        |           |                        |
| <b>MFLA1712</b> |                                                                                                               | 0.000                        | 0.000                     |                         |                        | ■ ■        |                                               | 0.000                        | 0.000                     |                         |                        |        | ■         |                        |
|                 | " protein of unknown function DUF6, transmembrane [Methylobacillus flagellatus KT]637938626 YP_545821 ""      |                              |                           |                         |                        |            |                                               |                              |                           |                         |                        |        |           |                        |
| <b>MFLA1713</b> |                                                                                                               | 0.000                        | 0.000                     |                         |                        | ■ ■        |                                               | 0.000                        | 0.000                     |                         |                        |        | ■         |                        |
|                 | hypothetical protein [Methylobacillus flagellatus KT]637938627 YP_545822                                      |                              |                           |                         |                        |            |                                               |                              |                           |                         |                        |        |           |                        |
| <b>MFLA1714</b> | 4.497                                                                                                         | 3.659                        | 5.138                     | 0.855                   | 0.855                  | Y ●● Y     | 1.44 E-1                                      | 22.810                       | 23.221                    | 24.030                  | -0.578                 | Y ●    |           |                        |
|                 | " two component transcriptional regulator, LuxR family [Methylobacillus flagellatus KT]637938628 YP_545823 "" |                              |                           |                         |                        |            |                                               |                              |                           |                         |                        |        |           |                        |
| <b>MFLA1715</b> |                                                                                                               | 3.844                        | 2.184                     | 4.241                   | 1.664                  | Y ●● Y     | 1.84 E-1                                      | 22.438                       | 21.954                    | 23.216                  | 0.066                  | Y ●    |           |                        |
|                 | multi-sensor signal transduction histidine kinase [Methylobacillus flagellatus KT]637938629 YP_545824         |                              |                           |                         |                        |            |                                               |                              |                           |                         |                        |        |           |                        |
| <b>MFLA1716</b> |                                                                                                               | 0.000                        | 0.000                     |                         |                        | ■ ■        |                                               | 0.000                        | 0.000                     |                         |                        |        | ■         |                        |
|                 | hypothetical protein [Methylobacillus flagellatus KT]637938630 YP_545825                                      |                              |                           |                         |                        |            |                                               |                              |                           |                         |                        |        |           |                        |
| <b>MFLA1717</b> |                                                                                                               | 2.892                        | 2.649                     | 3.776                   | 0.418                  | Y ●● Y     | 2.5 E-1                                       | 23.140                       | 23.045                    | 24.093                  | 0.380                  | Y ●    |           |                        |
|                 | Pyrrolo-quinoline quinone [Methylobacillus flagellatus KT]637938631 YP_545826                                 |                              |                           |                         |                        |            |                                               |                              |                           |                         |                        |        |           |                        |
| <b>MFLA1718</b> |                                                                                                               | 0.000                        | 0.000                     |                         |                        | ■ ■        |                                               | 0.000                        | 0.000                     |                         |                        |        | ■         |                        |
|                 | protein of unknown function DUF1555 [Methylobacillus flagellatus KT]637938632 YP_545827                       |                              |                           |                         |                        |            |                                               |                              |                           |                         |                        |        |           |                        |
| <b>MFLA1719</b> |                                                                                                               | 0.000                        | 0.000                     |                         |                        | ■ ■        |                                               | 0.000                        | 0.000                     |                         |                        |        | ■         |                        |
|                 | Sel1 [Methylobacillus flagellatus KT]637938633 YP_545828                                                      |                              |                           |                         |                        |            |                                               |                              |                           |                         |                        |        |           |                        |
| <b>MFLA1720</b> |                                                                                                               | 0.000                        | 0.000                     |                         |                        | ■ ■        |                                               | 0.000                        | 0.000                     |                         |                        |        | ■         |                        |
|                 | hypothetical protein [Methylobacillus flagellatus KT]637938634 YP_545829                                      |                              |                           |                         |                        |            |                                               |                              |                           |                         |                        |        |           |                        |
| <b>MFLA1721</b> |                                                                                                               | 0.000                        | 0.000                     |                         |                        | ■ ■        |                                               | 0.000                        | 0.000                     |                         |                        |        | ■         |                        |
|                 | Na <sup>+</sup> /Pi-cotransporter [Methylobacillus flagellatus KT]637938635 YP_545830                         |                              |                           |                         |                        |            |                                               |                              |                           |                         |                        |        |           |                        |
| <b>MFLA1722</b> |                                                                                                               | 2.461                        | 3.551                     | 4.107                   | -1.091                 | Y ●● Y     | 2.49 E-2                                      | 21.258                       | 22.157                    | 22.776                  | -0.917                 | Y ●    |           |                        |
|                 | methyltransferase small [Methylobacillus flagellatus KT]637938636 YP_545831                                   |                              |                           |                         |                        |            |                                               |                              |                           |                         |                        |        |           |                        |
| <b>MFLA1723</b> | 3.66 E-2                                                                                                      | 6.511                        | 6.379                     | 7.446                   | 0.151                  | Y ●● Y     | 1.43 E-1                                      | 25.550                       | 25.455                    | 26.504                  | 0.087                  | Y ●    |           |                        |
|                 | L-sorbose dehydrogenase [Methylobacillus flagellatus KT]637938637 YP_545832                                   |                              |                           |                         |                        |            |                                               |                              |                           |                         |                        |        |           |                        |
| <b>MFLA1724</b> |                                                                                                               | 0.000                        | 0.000                     |                         |                        | ■ ■        |                                               | 0.000                        | 0.000                     |                         |                        |        | ■         |                        |
|                 | hypothetical protein [Methylobacillus flagellatus KT]637938638 YP_545833                                      |                              |                           |                         |                        |            |                                               |                              |                           |                         |                        |        |           |                        |
| <b>MFLA1725</b> |                                                                                                               | 2.106                        |                           | 2.106                   |                        | Y ●● Y     |                                               | 21.572                       |                           | 21.572                  |                        | Y ●    |           |                        |
|                 | metal dependent phosphohydrolase [Methylobacillus flagellatus KT]637938639 YP_545834                          |                              |                           |                         |                        |            |                                               |                              |                           |                         |                        |        |           |                        |
| <b>MFLA1726</b> |                                                                                                               | 4.705                        | 2.941                     | 5.078                   | 1.786                  | Y ●● Y     | 4.87 E-2                                      | 22.050                       | 20.428                    | 22.456                  | 1.510                  | Y ●    |           |                        |
|                 | Glutamate-ammonia-ligase adenyltransferase [Methylobacillus flagellatus KT]637938640 YP_545835                |                              |                           |                         |                        |            |                                               |                              |                           |                         |                        |        |           |                        |
| <b>MFLA1727</b> | 4.8 E-2                                                                                                       | 6.904                        | 6.939                     | 7.922                   | -0.048                 | Y ●● Y     | 1.17 E-1                                      | 26.257                       | 26.540                    | 27.405                  | -0.320                 | Y ●    |           |                        |
|                 | Acetate--CoA ligase [Methylobacillus flagellatus KT]637938641 YP_545836                                       |                              |                           |                         |                        |            |                                               |                              |                           |                         |                        |        |           |                        |
| <b>MFLA1728</b> |                                                                                                               | 3.710                        | 4.288                     | 5.028                   | -0.667                 | Y ●● Y     | 1.39 E-1                                      | 24.585                       | 25.053                    | 25.837                  | -0.816                 | Y ●    |           |                        |
|                 | protein of unknown function DUF442 [Methylobacillus flagellatus KT]637938642 YP_545837                        |                              |                           |                         |                        |            |                                               |                              |                           |                         |                        |        |           |                        |



| ORF             | AM/OH <i>M. Flagellatus</i> Spectral Count                                                                                  |                              |                           |                         |                        | AM/OH <i>M. Flagellatus</i> Protein Intensity |          |                              |                           |                         | Spectral Count         |           | Protein Intensity |  | Log <sub>2</sub> Ratio |
|-----------------|-----------------------------------------------------------------------------------------------------------------------------|------------------------------|---------------------------|-------------------------|------------------------|-----------------------------------------------|----------|------------------------------|---------------------------|-------------------------|------------------------|-----------|-------------------|--|------------------------|
|                 | q-value                                                                                                                     | log <sub>2</sub> Methylamine | log <sub>2</sub> Methanol | log <sub>2</sub> Sc Sum | log <sub>2</sub> Ratio | Regulation                                    | q-value  | log <sub>2</sub> Methylamine | log <sub>2</sub> Methanol | log <sub>2</sub> PI Sum | log <sub>2</sub> Ratio | Consensus |                   |  |                        |
| <b>MFLA1729</b> |                                                                                                                             | 0.813                        | 1.769                     | 2.369                   | 0.055                  | Y ●● Y                                        | 9.73 E-2 | 19.536                       | 20.222                    | 20.919                  | 0.323                  | Y ●       |                   |  |                        |
|                 | <i>"HAD-superfamily hydrolase subfamily IA, variant 3 [Methylobacillus flagellatus KT]637938643 YP_545838 ""</i>            |                              |                           |                         |                        |                                               |          |                              |                           |                         |                        |           |                   |  |                        |
| <b>MFLA1730</b> |                                                                                                                             | 0.000                        | 0.000                     |                         |                        | ■●                                            |          | 0.000                        | 0.000                     |                         |                        | ■         |                   |  |                        |
|                 | <i>transcriptional regulator [Methylobacillus flagellatus KT]637938644 YP_545839</i>                                        |                              |                           |                         |                        |                                               |          |                              |                           |                         |                        |           |                   |  |                        |
| <b>MFLA1731</b> |                                                                                                                             | 0.000                        | 0.000                     |                         |                        | ■●                                            |          | 0.000                        | 0.000                     |                         |                        | ■         |                   |  |                        |
|                 | <i>Antibiotic biosynthesis monooxygenase [Methylobacillus flagellatus KT]637938645 YP_545840</i>                            |                              |                           |                         |                        |                                               |          |                              |                           |                         |                        |           |                   |  |                        |
| <b>MFLA1732</b> |                                                                                                                             | 0.000                        | 0.000                     |                         |                        | ■●                                            |          | 0.000                        | 0.000                     |                         |                        | ■         |                   |  |                        |
|                 | <i>"Alcohol dehydrogenase, zinc-binding [Methylobacillus flagellatus KT]637938646 YP_545841 ""</i>                          |                              |                           |                         |                        |                                               |          |                              |                           |                         |                        |           |                   |  |                        |
| <b>MFLA1733</b> |                                                                                                                             | 3.283                        | 3.321                     | 4.302                   | 0.036                  | Y ●● Y                                        | 1.6 E-2  | 20.491                       | 22.057                    | 22.477                  | -1.760                 | Y ●       |                   |  |                        |
|                 | <i>beta-lactamase-like protein [Methylobacillus flagellatus KT]637938647 YP_545842</i>                                      |                              |                           |                         |                        |                                               |          |                              |                           |                         |                        |           |                   |  |                        |
| <b>MFLA1734</b> |                                                                                                                             | 4.938                        | 4.036                     | 5.556                   | 0.877                  | Y ●● Y                                        | 1.63 E-1 | 23.299                       | 23.042                    | 24.176                  | 0.195                  | Y ●       |                   |  |                        |
|                 | <i>"transcriptional regulator, Crp/Fnr family [Methylobacillus flagellatus KT]637938648 YP_545843 ""</i>                    |                              |                           |                         |                        |                                               |          |                              |                           |                         |                        |           |                   |  |                        |
| <b>MFLA1735</b> |                                                                                                                             | 2.543                        | 1.966                     | 3.283                   | 0.362                  | Y ●● Y                                        | 4.19 E-2 | 21.163                       | 21.928                    | 22.596                  | -0.868                 | Y ●       |                   |  |                        |
|                 | <i>hypothetical protein [Methylobacillus flagellatus KT]637938649 YP_545844</i>                                             |                              |                           |                         |                        |                                               |          |                              |                           |                         |                        |           |                   |  |                        |
| <b>MFLA1736</b> |                                                                                                                             | 0.000                        | 0.000                     |                         |                        | ■●                                            |          | 0.000                        | 0.000                     |                         |                        | ■         |                   |  |                        |
|                 | <i>response regulator receiver domain protein (CheY-like) [Methylobacillus flagellatus KT]637938650 YP_545845</i>           |                              |                           |                         |                        |                                               |          |                              |                           |                         |                        |           |                   |  |                        |
| <b>MFLA1737</b> |                                                                                                                             | 2.15 E-2                     | 5.172                     | 5.757                   | 6.494                  | -0.587                                        | Y ●● Y   | 2.56 E-2                     | 23.520                    | 24.632                  | 25.181                 | -1.281    | Y ●               |  |                        |
|                 | <i>peptide chain release factor 3 [Methylobacillus flagellatus KT]637938651 YP_545846</i>                                   |                              |                           |                         |                        |                                               |          |                              |                           |                         |                        |           |                   |  |                        |
| <b>MFLA1738</b> |                                                                                                                             |                              | 0.585                     | 0.585                   |                        | Y ●● Y                                        |          |                              | 20.129                    | 20.129                  |                        | Y ●       |                   |  |                        |
|                 | <i>hypothetical protein [Methylobacillus flagellatus KT]637938652 YP_545847</i>                                             |                              |                           |                         |                        |                                               |          |                              |                           |                         |                        |           |                   |  |                        |
| <b>MFLA1739</b> |                                                                                                                             | 3.736                        | 2.649                     | 4.292                   | 1.397                  | Y ●● Y                                        | 1.59 E-1 | 21.004                       | 21.507                    | 22.278                  | -0.697                 | Y ●       |                   |  |                        |
|                 | <i>"glycosyl transferase, group 1 [Methylobacillus flagellatus KT]637938653 YP_545848 ""</i>                                |                              |                           |                         |                        |                                               |          |                              |                           |                         |                        |           |                   |  |                        |
| <b>MFLA1740</b> |                                                                                                                             | 0.000                        | 0.000                     |                         |                        | ■●                                            |          | 0.000                        | 0.000                     |                         |                        | ■         |                   |  |                        |
|                 | <i>hypothetical protein [Methylobacillus flagellatus KT]637938654 YP_545849</i>                                             |                              |                           |                         |                        |                                               |          |                              |                           |                         |                        |           |                   |  |                        |
| <b>MFLA1741</b> |                                                                                                                             | 0.000                        | 0.000                     |                         |                        | ■●                                            |          | 0.000                        | 0.000                     |                         |                        | ■         |                   |  |                        |
|                 | <i>hypothetical protein [Methylobacillus flagellatus KT]637938655 YP_545850</i>                                             |                              |                           |                         |                        |                                               |          |                              |                           |                         |                        |           |                   |  |                        |
| <b>MFLA1742</b> |                                                                                                                             |                              | 1.000                     | 1.000                   |                        | Y ●● Y                                        |          |                              | 18.349                    | 18.349                  |                        | Y ●       |                   |  |                        |
|                 | <i>hypothetical protein [Methylobacillus flagellatus KT]637938656 YP_545851</i>                                             |                              |                           |                         |                        |                                               |          |                              |                           |                         |                        |           |                   |  |                        |
| <b>MFLA1743</b> |                                                                                                                             | 2.843                        | 2.170                     | 3.545                   | 0.673                  | Y ●● Y                                        |          | 21.259                       | 20.269                    | 21.847                  | 0.990                  | Y ●       |                   |  |                        |
|                 | <i>ABC transporter related [Methylobacillus flagellatus KT]637938657 YP_545852</i>                                          |                              |                           |                         |                        |                                               |          |                              |                           |                         |                        |           |                   |  |                        |
| <b>MFLA1744</b> |                                                                                                                             | 7.68 E-2                     | 5.222                     | 4.900                   | 6.070                  | 0.314                                         | Y ●● Y   | 2.54 E-1                     | 22.367                    | 22.320                  | 23.343                 | -0.013    | Y ●               |  |                        |
|                 | <i>hypothetical protein [Methylobacillus flagellatus KT]637938658 YP_545853</i>                                             |                              |                           |                         |                        |                                               |          |                              |                           |                         |                        |           |                   |  |                        |
| <b>MFLA1745</b> |                                                                                                                             | 3.159                        | 2.334                     | 3.805                   | 0.494                  | Y ●● Y                                        | 7.52 E-2 | 22.843                       | 21.326                    | 23.275                  | 1.320                  | Y ●       |                   |  |                        |
|                 | <i>Nitrilase/cyanide hydratase and apolipoprotein N-acyltransferase [Methylobacillus flagellatus KT]637938659 YP_545854</i> |                              |                           |                         |                        |                                               |          |                              |                           |                         |                        |           |                   |  |                        |
| <b>MFLA1746</b> |                                                                                                                             | 5.921                        | 5.459                     | 6.708                   | 0.276                  | Y ●● Y                                        | 5.48 E-2 | 25.353                       | 26.052                    | 26.744                  | -0.796                 | Y ●       |                   |  |                        |
|                 | <i>"peptidase U62, modulator of DNA gyrase [Methylobacillus flagellatus KT]637938660 YP_545855 ""</i>                       |                              |                           |                         |                        |                                               |          |                              |                           |                         |                        |           |                   |  |                        |
| <b>MFLA1747</b> |                                                                                                                             | 9.04 E-2                     | 6.921                     | 7.103                   | 8.015                  | -0.177                                        | Y ●● Y   | 2.4 E-1                      | 26.693                    | 26.800                  | 27.747                 | -0.248    | Y ●               |  |                        |
|                 | <i>hypothetical protein [Methylobacillus flagellatus KT]637938661 YP_545856</i>                                             |                              |                           |                         |                        |                                               |          |                              |                           |                         |                        |           |                   |  |                        |
| <b>MFLA1748</b> |                                                                                                                             | 5.18 E-2                     | 5.832                     | 5.947                   | 6.890                  | -0.159                                        | Y ●● Y   | 1.39 E-1                     | 24.045                    | 24.511                  | 25.297                 | -0.813    | Y ●               |  |                        |
|                 | <i>transcription-repair coupling factor [Methylobacillus flagellatus KT]637938662 YP_545857</i>                             |                              |                           |                         |                        |                                               |          |                              |                           |                         |                        |           |                   |  |                        |
| <b>MFLA1749</b> |                                                                                                                             | 0.000                        | 0.000                     |                         |                        | ■●                                            |          | 0.000                        | 0.000                     |                         |                        | ■         |                   |  |                        |
|                 | <i>hypothetical protein [Methylobacillus flagellatus KT]637938663 YP_545858</i>                                             |                              |                           |                         |                        |                                               |          |                              |                           |                         |                        |           |                   |  |                        |
| <b>MFLA1750</b> |                                                                                                                             | 0.000                        | 0.000                     |                         |                        | ■●                                            |          | 0.000                        | 0.000                     |                         |                        | ■         |                   |  |                        |
|                 | <i>hypothetical protein [Methylobacillus flagellatus KT]637938664 YP_545859</i>                                             |                              |                           |                         |                        |                                               |          |                              |                           |                         |                        |           |                   |  |                        |

| ORF             | AM/OH <i>M. Flagellatus</i> Spectral Count                                                                           |                              |                           |                         |                        |            | AM/OH <i>M. Flagellatus</i> Protein Intensity |                              |                           |                         |                        |        | Consensus | Log <sub>2</sub> Ratio |  |
|-----------------|----------------------------------------------------------------------------------------------------------------------|------------------------------|---------------------------|-------------------------|------------------------|------------|-----------------------------------------------|------------------------------|---------------------------|-------------------------|------------------------|--------|-----------|------------------------|--|
|                 | q-value                                                                                                              | log <sub>2</sub> Methylamine | log <sub>2</sub> Methanol | log <sub>2</sub> Sc Sum | log <sub>2</sub> Ratio | Regulation | q-value                                       | log <sub>2</sub> Methylamine | log <sub>2</sub> Methanol | log <sub>2</sub> PI Sum | log <sub>2</sub> Ratio |        |           |                        |  |
| <b>MFLA1751</b> | 4.444                                                                                                                | 3.871                        | 5.186                     | 0.352                   | Y                      | ●●         | Y                                             | 2.66 E-1                     | 22.500                    | 22.446                  | 23.473                 | -0.255 | Y         | ●                      |  |
|                 | <i>UvrD/REP helicase [Methylobacillus flagellatus KT]637938665 YP_545860</i>                                         |                              |                           |                         |                        |            |                                               |                              |                           |                         |                        |        |           |                        |  |
| <b>MFLA1752</b> | 3.608                                                                                                                | 3.177                        | 4.408                     | 1.585                   | Y                      | ●●         | Y                                             | 2.45 E-2                     | 23.648                    | 21.017                  | 23.864                 | 3.834  | Y         | ●                      |  |
|                 | <i>hypothetical protein [Methylobacillus flagellatus KT]637938666 YP_545861</i>                                      |                              |                           |                         |                        |            |                                               |                              |                           |                         |                        |        |           |                        |  |
| <b>MFLA1753</b> | 2.418                                                                                                                |                              | 2.418                     |                         | Y                      | ●●         | Y                                             |                              | 20.314                    |                         | 20.314                 |        | Y         | ●                      |  |
|                 | <i>GreA/GreB family elongation factor [Methylobacillus flagellatus KT]637938667 YP_545862</i>                        |                              |                           |                         |                        |            |                                               |                              |                           |                         |                        |        |           |                        |  |
| <b>MFLA1754</b> | 0.000                                                                                                                | 0.000                        |                           |                         |                        | ■          | ■                                             |                              | 0.000                     | 0.000                   |                        |        |           | ■                      |  |
|                 | <i>hypothetical protein [Methylobacillus flagellatus KT]637938668 YP_545863</i>                                      |                              |                           |                         |                        |            |                                               |                              |                           |                         |                        |        |           |                        |  |
| <b>MFLA1755</b> | 7.205                                                                                                                | 7.901                        | 8.594                     | -0.724                  | Y                      | ●●         | Y                                             | 6.99 E-2                     | 27.301                    | 28.012                  | 28.700                 | -0.645 | Y         | ●                      |  |
|                 | <i>translation elongation factor P [Methylobacillus flagellatus KT]637938669 YP_545864</i>                           |                              |                           |                         |                        |            |                                               |                              |                           |                         |                        |        |           |                        |  |
| <b>MFLA1756</b> | 0.000                                                                                                                | 0.000                        |                           |                         |                        | ■          | ■                                             |                              | 0.000                     | 0.000                   |                        |        |           | ■                      |  |
|                 | <i>hypothetical protein [Methylobacillus flagellatus KT]637938670 YP_545865</i>                                      |                              |                           |                         |                        |            |                                               |                              |                           |                         |                        |        |           |                        |  |
| <b>MFLA1757</b> | 0.000                                                                                                                | 0.000                        |                           |                         |                        | ■          | ■                                             |                              | 0.000                     | 0.000                   |                        |        |           | ■                      |  |
|                 | <i>ammonium transporter [Methylobacillus flagellatus KT]637938671 YP_545866</i>                                      |                              |                           |                         |                        |            |                                               |                              |                           |                         |                        |        |           |                        |  |
| <b>MFLA1758</b> | 0.000                                                                                                                | 0.000                        |                           |                         |                        | ■          | ■                                             |                              | 0.000                     | 0.000                   |                        |        |           | ■                      |  |
|                 | <i>uracil-DNA glycosylase [Methylobacillus flagellatus KT]637938672 YP_545867</i>                                    |                              |                           |                         |                        |            |                                               |                              |                           |                         |                        |        |           |                        |  |
| <b>MFLA1759</b> | 0.000                                                                                                                | 0.000                        |                           |                         |                        | ■          | ■                                             |                              | 0.000                     | 0.000                   |                        |        |           | ■                      |  |
|                 | <i>Radical SAM [Methylobacillus flagellatus KT]637938673 YP_545868</i>                                               |                              |                           |                         |                        |            |                                               |                              |                           |                         |                        |        |           |                        |  |
| <b>MFLA1760</b> | 0.521                                                                                                                |                              | 0.521                     |                         | Y                      | ●●         | Y                                             |                              | 19.006                    |                         | 19.006                 |        | Y         | ●                      |  |
|                 | <i>CheW protein [Methylobacillus flagellatus KT]637938674 YP_545869</i>                                              |                              |                           |                         |                        |            |                                               |                              |                           |                         |                        |        |           |                        |  |
| <b>MFLA1761</b> | 1.843                                                                                                                | 1.915                        | 2.879                     | 1.008                   | Y                      | ●●         | Y                                             | 6.08 E-2                     | 20.486                    | 20.983                  | 21.755                 | 0.509  | Y         | ●                      |  |
|                 | <i>" two component transcriptional regulator, LuxR family [Methylobacillus flagellatus KT]637938675 YP_545870 ""</i> |                              |                           |                         |                        |            |                                               |                              |                           |                         |                        |        |           |                        |  |
| <b>MFLA1762</b> | 0.000                                                                                                                | 0.000                        |                           |                         |                        | ■          | ■                                             |                              | 0.000                     | 0.000                   |                        |        |           | ■                      |  |
|                 | <i>periplasmic sensor hybrid histidine kinase [Methylobacillus flagellatus KT]637938676 YP_545871</i>                |                              |                           |                         |                        |            |                                               |                              |                           |                         |                        |        |           |                        |  |
| <b>MFLA1763</b> | 0.000                                                                                                                | 0.000                        |                           |                         |                        | ■          | ■                                             |                              | 0.000                     | 0.000                   |                        |        |           | ■                      |  |
|                 | <i>HupE/UreJ protein [Methylobacillus flagellatus KT]637938677 YP_545872</i>                                         |                              |                           |                         |                        |            |                                               |                              |                           |                         |                        |        |           |                        |  |
| <b>MFLA1764</b> | 2.967                                                                                                                | 4.044                        | 4.604                     | -1.067                  | Y                      | ●●         | Y                                             | 3.98 E-2                     | 21.709                    | 22.542                  | 23.185                 | -0.951 | Y         | ●                      |  |
|                 | <i>urease accessory protein UreG [Methylobacillus flagellatus KT]637938678 YP_545873</i>                             |                              |                           |                         |                        |            |                                               |                              |                           |                         |                        |        |           |                        |  |
| <b>MFLA1765</b> | 0.000                                                                                                                | 0.000                        |                           |                         |                        | ■          | ■                                             |                              | 0.000                     | 0.000                   |                        |        |           | ■                      |  |
|                 | <i>Urease accessory protein UreF [Methylobacillus flagellatus KT]637938679 YP_545874</i>                             |                              |                           |                         |                        |            |                                               |                              |                           |                         |                        |        |           |                        |  |
| <b>MFLA1766</b> | 0.000                                                                                                                | 0.000                        |                           |                         |                        | ■          | ■                                             |                              | 0.000                     | 0.000                   |                        |        |           | ■                      |  |
|                 | <i>UreE urease accessory-like protein [Methylobacillus flagellatus KT]637938680 YP_545875</i>                        |                              |                           |                         |                        |            |                                               |                              |                           |                         |                        |        |           |                        |  |
| <b>MFLA1767</b> | 3.341                                                                                                                | 3.435                        | 4.389                     | -0.041                  | Y                      | ●●         | Y                                             | 2.52 E-2                     | 21.264                    | 22.477                  | 22.995                 | -1.264 | Y         | ●                      |  |
|                 | <i>" urease, alpha subunit [Methylobacillus flagellatus KT]637938681 YP_545876 ""</i>                                |                              |                           |                         |                        |            |                                               |                              |                           |                         |                        |        |           |                        |  |
| <b>MFLA1768</b> | 0.000                                                                                                                | 0.000                        |                           |                         |                        | ■          | ■                                             |                              | 0.000                     | 0.000                   |                        |        |           | ■                      |  |
|                 | <i>" urease, beta subunit [Methylobacillus flagellatus KT]637938682 YP_545877 ""</i>                                 |                              |                           |                         |                        |            |                                               |                              |                           |                         |                        |        |           |                        |  |
| <b>MFLA1769</b> | 1.843                                                                                                                | 0.931                        | 2.458                     | 0.911                   | Y                      | ●●         | Y                                             |                              | 18.323                    | 19.965                  | 20.366                 | -1.641 | Y         | ●                      |  |
|                 | <i>" urease, gamma subunit [Methylobacillus flagellatus KT]637938683 YP_545878 ""</i>                                |                              |                           |                         |                        |            |                                               |                              |                           |                         |                        |        |           |                        |  |
| <b>MFLA1770</b> | 0.000                                                                                                                | 0.000                        |                           |                         |                        | ■          | ■                                             |                              | 0.000                     | 0.000                   |                        |        |           | ■                      |  |
|                 | <i>Urease accessory protein UreD [Methylobacillus flagellatus KT]637938684 YP_545879</i>                             |                              |                           |                         |                        |            |                                               |                              |                           |                         |                        |        |           |                        |  |
| <b>MFLA1771</b> | 0.000                                                                                                                | 0.000                        |                           |                         |                        | ■          | ■                                             |                              | 0.000                     | 0.000                   |                        |        |           | ■                      |  |
|                 | <i>ABC transporter related [Methylobacillus flagellatus KT]637938685 YP_545880</i>                                   |                              |                           |                         |                        |            |                                               |                              |                           |                         |                        |        |           |                        |  |
| <b>MFLA1772</b> | 1.106                                                                                                                |                              | 1.106                     |                         | Y                      | ●●         | Y                                             |                              | 19.410                    |                         | 19.410                 |        | Y         | ●                      |  |
|                 | <i>ABC transporter related [Methylobacillus flagellatus KT]637938686 YP_545881</i>                                   |                              |                           |                         |                        |            |                                               |                              |                           |                         |                        |        |           |                        |  |



| ORF             | AM/OH <i>M. Flagellatus</i> Spectral Count                                                                          |                      |                   |                 |                 |            | AM/OH <i>M. Flagellatus</i> Protein Intensity |                      |                   |                 |                 |           | Spectral Count         |   | Protein Intensity |  |
|-----------------|---------------------------------------------------------------------------------------------------------------------|----------------------|-------------------|-----------------|-----------------|------------|-----------------------------------------------|----------------------|-------------------|-----------------|-----------------|-----------|------------------------|---|-------------------|--|
|                 | $q$ -value                                                                                                          | $\log_2$ Methylamine | $\log_2$ Methanol | $\log_2$ Sc Sum | $\log_2$ -Ratio | Regulation | $q$ -value                                    | $\log_2$ Methylamine | $\log_2$ Methanol | $\log_2$ PI Sum | $\log_2$ -Ratio | Consensus | Log <sub>2</sub> Ratio |   |                   |  |
| <b>MFLA1773</b> |                                                                                                                     | 0.000                | 0.000             |                 |                 |            |                                               | 0.000                | 0.000             |                 |                 |           |                        |   |                   |  |
|                 | <i>inner-membrane translocator [Methylobacillus flagellatus KT]637938687 YP_545882</i>                              |                      |                   |                 |                 |            |                                               |                      |                   |                 |                 |           |                        |   |                   |  |
| <b>MFLA1774</b> |                                                                                                                     | 0.000                | 0.000             |                 |                 |            |                                               | 0.000                | 0.000             |                 |                 |           |                        |   |                   |  |
|                 | <i>inner-membrane translocator [Methylobacillus flagellatus KT]637938688 YP_545883</i>                              |                      |                   |                 |                 |            |                                               |                      |                   |                 |                 |           |                        |   |                   |  |
| <b>MFLA1775</b> | 5.432                                                                                                               | 4.861                | 6.175             | 0.576           | Y               | ●●         | Y                                             | 1.02 E-1             | 25.078            | 24.095          | 25.669          | 0.941     | Y                      | ● |                   |  |
|                 | <i>Twin-arginine translocation pathway signal [Methylobacillus flagellatus KT]637938689 YP_545884</i>               |                      |                   |                 |                 |            |                                               |                      |                   |                 |                 |           |                        |   |                   |  |
| <b>MFLA1776</b> |                                                                                                                     | 0.000                | 0.000             |                 |                 |            |                                               | 0.000                | 0.000             |                 |                 |           |                        |   |                   |  |
|                 | <i>" Glutamine amidotransferase, class-II [Methylobacillus flagellatus KT]637938690 YP_545885 ""</i>                |                      |                   |                 |                 |            |                                               |                      |                   |                 |                 |           |                        |   |                   |  |
| <b>MFLA1777</b> |                                                                                                                     |                      | 2.844             | 2.844           |                 | Y          | ●●                                            | Y                    |                   | 21.445          | 21.445          |           | Y                      | ● |                   |  |
|                 | <i>Formamidase [Methylobacillus flagellatus KT]637938691 YP_545886</i>                                              |                      |                   |                 |                 |            |                                               |                      |                   |                 |                 |           |                        |   |                   |  |
| <b>MFLA1778</b> |                                                                                                                     | 0.000                | 0.000             |                 |                 |            |                                               | 0.000                | 0.000             |                 |                 |           |                        |   |                   |  |
|                 | <i>hypothetical protein [Methylobacillus flagellatus KT]637938692 YP_545887</i>                                     |                      |                   |                 |                 |            |                                               |                      |                   |                 |                 |           |                        |   |                   |  |
| <b>MFLA1779</b> |                                                                                                                     | 0.000                | 0.000             |                 |                 |            |                                               | 0.000                | 0.000             |                 |                 |           |                        |   |                   |  |
|                 | <i>hypothetical protein [Methylobacillus flagellatus KT]637938693 YP_545888</i>                                     |                      |                   |                 |                 |            |                                               |                      |                   |                 |                 |           |                        |   |                   |  |
| <b>MFLA1780</b> | 4.918                                                                                                               | 3.875                | 5.489             | 1.134           | Y               | ●●         | Y                                             | 1.34 E-1             | 21.561            | 22.727          | 23.259          | -0.241    | Y                      | ● |                   |  |
|                 | <i>hypothetical protein [Methylobacillus flagellatus KT]637938694 YP_545889</i>                                     |                      |                   |                 |                 |            |                                               |                      |                   |                 |                 |           |                        |   |                   |  |
| <b>MFLA1781</b> | 3.106                                                                                                               | 0.346                | 3.304             | 2.759           | Y               | ●●         | Y                                             |                      | 25.783            | 21.316          | 25.847          | 4.468     | Y                      | ● |                   |  |
|                 | <i>putative prophage repressor [Methylobacillus flagellatus KT]637938695 YP_545890</i>                              |                      |                   |                 |                 |            |                                               |                      |                   |                 |                 |           |                        |   |                   |  |
| <b>MFLA1782</b> |                                                                                                                     | 0.000                | 0.000             |                 |                 |            |                                               | 0.000                | 0.000             |                 |                 |           |                        |   |                   |  |
|                 | <i>[Methylobacillus flagellatus KT]639329602</i>                                                                    |                      |                   |                 |                 |            |                                               |                      |                   |                 |                 |           |                        |   |                   |  |
| <b>MFLA1783</b> |                                                                                                                     | 0.000                | 0.000             |                 |                 |            |                                               | 0.000                | 0.000             |                 |                 |           |                        |   |                   |  |
|                 | <i>hypothetical protein [Methylobacillus flagellatus KT]637938696 YP_545891</i>                                     |                      |                   |                 |                 |            |                                               |                      |                   |                 |                 |           |                        |   |                   |  |
| <b>MFLA1784</b> | 1.26 E-5                                                                                                            | 7.100                | 6.432             | 7.804           | 0.682           | R          | ●●                                            | Y                    | 2.21 E-1          | 24.480          | 24.399          | 25.440    | 0.113                  | R | ●                 |  |
|                 | <i>nitrilotriacetate monooxygenase component A [Methylobacillus flagellatus KT]637938697 YP_545892</i>              |                      |                   |                 |                 |            |                                               |                      |                   |                 |                 |           |                        |   |                   |  |
| <b>MFLA1785</b> | 1.48 E-1                                                                                                            | 7.393                | 7.339             | 8.366           | 0.052           | Y          | ●●                                            | Y                    | 9.05 E-2          | 26.983          | 27.238          | 28.116    | -0.244                 | Y | ●                 |  |
|                 | <i>short-chain dehydrogenase/reductase SDR [Methylobacillus flagellatus KT]637938698 YP_545893</i>                  |                      |                   |                 |                 |            |                                               |                      |                   |                 |                 |           |                        |   |                   |  |
| <b>MFLA1786</b> |                                                                                                                     | 2.328                | 2.328             |                 |                 | Y          | ●●                                            | Y                    |                   | 20.066          | 20.066          |           | Y                      | ● |                   |  |
|                 | <i>Na<sup>+</sup>/solute symporter [Methylobacillus flagellatus KT]637938699 YP_545894</i>                          |                      |                   |                 |                 |            |                                               |                      |                   |                 |                 |           |                        |   |                   |  |
| <b>MFLA1787</b> |                                                                                                                     | 0.000                | 0.000             |                 |                 |            |                                               | 0.000                | 0.000             |                 |                 |           |                        |   |                   |  |
|                 | <i>Conserved TM helix [Methylobacillus flagellatus KT]637938700 YP_545895</i>                                       |                      |                   |                 |                 |            |                                               |                      |                   |                 |                 |           |                        |   |                   |  |
| <b>MFLA1788</b> | 4.460                                                                                                               | 4.379                | 5.420             | -0.541          | Y               | ●●         | Y                                             | 1.17 E-1             | 22.568            | 23.256          | 23.953          | -1.415    | Y                      | ● |                   |  |
|                 | <i>protein of unknown function UPF0061 [Methylobacillus flagellatus KT]637938701 YP_545896</i>                      |                      |                   |                 |                 |            |                                               |                      |                   |                 |                 |           |                        |   |                   |  |
| <b>MFLA1789</b> |                                                                                                                     | 0.000                | 0.000             |                 |                 |            |                                               | 0.000                | 0.000             |                 |                 |           |                        |   |                   |  |
|                 | <i>luciferase-like protein [Methylobacillus flagellatus KT]637938702 YP_545897</i>                                  |                      |                   |                 |                 |            |                                               |                      |                   |                 |                 |           |                        |   |                   |  |
| <b>MFLA1790</b> |                                                                                                                     | 0.000                | 0.000             |                 |                 |            |                                               | 0.000                | 0.000             |                 |                 |           |                        |   |                   |  |
|                 | <i>" transcriptional regulator, LysR family [Methylobacillus flagellatus KT]637938703 YP_545898 ""</i>              |                      |                   |                 |                 |            |                                               |                      |                   |                 |                 |           |                        |   |                   |  |
| <b>MFLA1791</b> |                                                                                                                     | 0.000                | 0.000             |                 |                 |            |                                               | 0.000                | 0.000             |                 |                 |           |                        |   |                   |  |
|                 | <i>Alpha/beta hydrolase fold-3 [Methylobacillus flagellatus KT]637938704 YP_545899</i>                              |                      |                   |                 |                 |            |                                               |                      |                   |                 |                 |           |                        |   |                   |  |
| <b>MFLA1792</b> |                                                                                                                     | 0.000                | 0.000             |                 |                 |            |                                               | 0.000                | 0.000             |                 |                 |           |                        |   |                   |  |
|                 | <i>secretion protein HlyD [Methylobacillus flagellatus KT]637938705 YP_545900</i>                                   |                      |                   |                 |                 |            |                                               |                      |                   |                 |                 |           |                        |   |                   |  |
| <b>MFLA1793</b> |                                                                                                                     | 0.000                | 0.000             |                 |                 |            |                                               | 0.000                | 0.000             |                 |                 |           |                        |   |                   |  |
|                 | <i>Hydrophobe/amphiphile efflux-1 HAE1 [Methylobacillus flagellatus KT]637938706 YP_545901</i>                      |                      |                   |                 |                 |            |                                               |                      |                   |                 |                 |           |                        |   |                   |  |
| <b>MFLA1794</b> |                                                                                                                     | 0.000                | 0.000             |                 |                 |            |                                               | 0.000                | 0.000             |                 |                 |           |                        |   |                   |  |
|                 | <i>" RND efflux system, outer membrane lipoprotein, NodT [Methylobacillus flagellatus KT]637938707 YP_545902 ""</i> |                      |                   |                 |                 |            |                                               |                      |                   |                 |                 |           |                        |   |                   |  |

| ORF             | AM/OH <i>M. Flagellatus</i> Spectral Count                                                                                    |                              |                           |                         |                        |            | AM/OH <i>M. Flagellatus</i> Protein Intensity |                              |                           |                         |                        |           | Spectral Count         |        | Protein Intensity |   |
|-----------------|-------------------------------------------------------------------------------------------------------------------------------|------------------------------|---------------------------|-------------------------|------------------------|------------|-----------------------------------------------|------------------------------|---------------------------|-------------------------|------------------------|-----------|------------------------|--------|-------------------|---|
|                 | q-value                                                                                                                       | log <sub>2</sub> Methylamine | log <sub>2</sub> Methanol | log <sub>2</sub> Sc Sum | log <sub>2</sub> Ratio | Regulation | q-value                                       | log <sub>2</sub> Methylamine | log <sub>2</sub> Methanol | log <sub>2</sub> PI Sum | log <sub>2</sub> Ratio | Consensus | Log <sub>2</sub> Ratio |        |                   |   |
| <b>MFLA1795</b> |                                                                                                                               | 0.000                        | 0.000                     |                         |                        |            |                                               | 0.000                        | 0.000                     |                         |                        |           |                        |        |                   |   |
|                 | <i>Lysine exporter protein (LYSE/YGGA) [Methylobacillus flagellatus KT]637938708 YP_545903</i>                                |                              |                           |                         |                        |            |                                               |                              |                           |                         |                        |           |                        |        |                   |   |
| <b>MFLA1796</b> |                                                                                                                               | 0.000                        | 0.000                     |                         |                        |            |                                               | 0.000                        | 0.000                     |                         |                        |           |                        |        |                   |   |
|                 | <i>transport-associated [Methylobacillus flagellatus KT]637938709 YP_545904</i>                                               |                              |                           |                         |                        |            |                                               |                              |                           |                         |                        |           |                        |        |                   |   |
| <b>MFLA1797</b> |                                                                                                                               | 0.000                        | 0.000                     |                         |                        |            |                                               | 0.000                        | 0.000                     |                         |                        |           |                        |        |                   |   |
|                 | <i>hypothetical protein [Methylobacillus flagellatus KT]637938710 YP_545905</i>                                               |                              |                           |                         |                        |            |                                               |                              |                           |                         |                        |           |                        |        |                   |   |
| <b>MFLA1798</b> | 4.477                                                                                                                         | 3.464                        | 5.058                     | 1.418                   | Y                      | ●          | ●                                             | Y                            | 7.11 E-2                  | 22.874                  | 22.284                 | 23.609    | 0.539                  | Y      | ●                 |   |
|                 | <i>Twin-arginine translocation pathway signal [Methylobacillus flagellatus KT]637938711 YP_545906</i>                         |                              |                           |                         |                        |            |                                               |                              |                           |                         |                        |           |                        |        |                   |   |
| <b>MFLA1799</b> |                                                                                                                               | 0.000                        | 0.000                     |                         |                        |            |                                               | 0.000                        | 0.000                     |                         |                        |           |                        |        |                   |   |
|                 | <i>major facilitator superfamily MFS_1 [Methylobacillus flagellatus KT]637938712 YP_545907</i>                                |                              |                           |                         |                        |            |                                               |                              |                           |                         |                        |           |                        |        |                   |   |
| <b>MFLA1800</b> |                                                                                                                               | 0.000                        | 0.000                     |                         |                        |            |                                               | 0.000                        | 0.000                     |                         |                        |           |                        |        |                   |   |
|                 | <i>putative transcriptional regulator [Methylobacillus flagellatus KT]637938713 YP_545908</i>                                 |                              |                           |                         |                        |            |                                               |                              |                           |                         |                        |           |                        |        |                   |   |
| <b>MFLA1801</b> | 1.74 E-2                                                                                                                      | 5.357                        | 5.555                     | 6.460                   | -0.324                 | Y          | ●                                             | ●                            | Y                         | 1.53 E-2                | 24.157                 | 25.284    | 25.828                 | -1.197 | Y                 | ● |
|                 | <i>NAD-dependent epimerase/dehydratase [Methylobacillus flagellatus KT]637938714 YP_545909</i>                                |                              |                           |                         |                        |            |                                               |                              |                           |                         |                        |           |                        |        |                   |   |
| <b>MFLA1802</b> |                                                                                                                               |                              | 0.000                     | 0.000                   |                        | Y          | ●                                             | ●                            | Y                         |                         |                        | 18.588    | 18.588                 |        | Y                 | ● |
|                 | <i>short-chain dehydrogenase/reductase SDR [Methylobacillus flagellatus KT]637938715 YP_545910</i>                            |                              |                           |                         |                        |            |                                               |                              |                           |                         |                        |           |                        |        |                   |   |
| <b>MFLA1803</b> |                                                                                                                               | 0.000                        | 0.000                     |                         |                        |            |                                               | 0.000                        | 0.000                     |                         |                        |           |                        |        |                   |   |
|                 | <i>CDP-diacylglycerol--glycerol-3-phosphate 3-phosphatidyltransferase [Methylobacillus flagellatus KT]637938719 YP_545911</i> |                              |                           |                         |                        |            |                                               |                              |                           |                         |                        |           |                        |        |                   |   |
| <b>MFLA1804</b> | 2.106                                                                                                                         | 1.540                        | 2.850                     | 1.640                   | Y                      | ●          | ●                                             | Y                            | 1.06 E-1                  | 18.671                  | 21.401                 | 21.604    | -1.615                 | Y      | ●                 |   |
|                 | <i>" excinuclease ABC, C subunit [Methylobacillus flagellatus KT]637938720 YP_545912 ""</i>                                   |                              |                           |                         |                        |            |                                               |                              |                           |                         |                        |           |                        |        |                   |   |
| <b>MFLA1805</b> | 2.398                                                                                                                         |                              | 2.398                     |                         |                        | Y          | ●                                             | ●                            | Y                         | 22.376                  |                        | 22.376    |                        | Y      | ●                 |   |
|                 | <i>4-oxalocrotonate tautomerase [Methylobacillus flagellatus KT]637938721 YP_545913</i>                                       |                              |                           |                         |                        |            |                                               |                              |                           |                         |                        |           |                        |        |                   |   |
| <b>MFLA1806</b> |                                                                                                                               | 0.000                        | 0.000                     |                         |                        |            |                                               | 0.000                        | 0.000                     |                         |                        |           |                        |        |                   |   |
|                 | <i>cation diffusion facilitator family transporter [Methylobacillus flagellatus KT]637938722 YP_545914</i>                    |                              |                           |                         |                        |            |                                               |                              |                           |                         |                        |           |                        |        |                   |   |
| <b>MFLA1807</b> | 2.521                                                                                                                         | 2.398                        | 3.461                     | 1.347                   | Y                      | ●          | ●                                             | Y                            | 5.54 E-2                  | 19.988                  | 22.690                 | 22.896    | -1.690                 | Y      | ●                 |   |
|                 | <i>protein of unknown function DUF519 [Methylobacillus flagellatus KT]637938723 YP_545915</i>                                 |                              |                           |                         |                        |            |                                               |                              |                           |                         |                        |           |                        |        |                   |   |
| <b>MFLA1808</b> |                                                                                                                               | 0.000                        | 0.000                     |                         |                        |            |                                               | 0.000                        | 0.000                     |                         |                        |           |                        |        |                   |   |
|                 | <i>Uncharacterized protein UPF0114 [Methylobacillus flagellatus KT]637938724 YP_545916</i>                                    |                              |                           |                         |                        |            |                                               |                              |                           |                         |                        |           |                        |        |                   |   |
| <b>MFLA1809</b> |                                                                                                                               | 0.000                        | 0.000                     |                         |                        |            |                                               | 0.000                        | 0.000                     |                         |                        |           |                        |        |                   |   |
|                 | <i>protein of unknown function DUF81 [Methylobacillus flagellatus KT]637938725 YP_545917</i>                                  |                              |                           |                         |                        |            |                                               |                              |                           |                         |                        |           |                        |        |                   |   |
| <b>MFLA1810</b> |                                                                                                                               | 0.000                        | 0.000                     |                         |                        |            |                                               | 0.000                        | 0.000                     |                         |                        |           |                        |        |                   |   |
|                 | <i>" protein of unknown function DUF395, YeeE/YedE [Methylobacillus flagellatus KT]637938726 YP_545918 ""</i>                 |                              |                           |                         |                        |            |                                               |                              |                           |                         |                        |           |                        |        |                   |   |
| <b>MFLA1811</b> |                                                                                                                               | 0.000                        | 0.000                     |                         |                        |            |                                               | 0.000                        | 0.000                     |                         |                        |           |                        |        |                   |   |
|                 | <i>" protein of unknown function DUF395, YeeE/YedE [Methylobacillus flagellatus KT]637938727 YP_545919 ""</i>                 |                              |                           |                         |                        |            |                                               |                              |                           |                         |                        |           |                        |        |                   |   |
| <b>MFLA1812</b> |                                                                                                                               | 0.000                        | 0.000                     |                         |                        |            |                                               | 0.000                        | 0.000                     |                         |                        |           |                        |        |                   |   |
|                 | <i>hypothetical protein [Methylobacillus flagellatus KT]637938728 YP_545920</i>                                               |                              |                           |                         |                        |            |                                               |                              |                           |                         |                        |           |                        |        |                   |   |
| <b>MFLA1813</b> | 3.81 E-2                                                                                                                      | 4.803                        | 5.366                     | 6.112                   | -0.583                 | Y          | ●                                             | ●                            | Y                         | 1.07 E-2                | 21.752                 | 23.657    | 23.999                 | -1.890 | Y                 | ● |
|                 | <i>protein of unknown function DUF442 [Methylobacillus flagellatus KT]637938729 YP_545921</i>                                 |                              |                           |                         |                        |            |                                               |                              |                           |                         |                        |           |                        |        |                   |   |
| <b>MFLA1814</b> | 3.273                                                                                                                         | 2.459                        | 3.923                     | 0.813                   | Y                      | ●          | ●                                             | Y                            |                           | 20.854                  | 20.935                 | 21.895    | -0.080                 | Y      | ●                 |   |
|                 | <i>beta-lactamase-like protein [Methylobacillus flagellatus KT]637938730 YP_545922</i>                                        |                              |                           |                         |                        |            |                                               |                              |                           |                         |                        |           |                        |        |                   |   |
| <b>MFLA1815</b> | 2.691                                                                                                                         | 1.540                        | 3.227                     | 2.225                   | Y                      | ●          | ●                                             | Y                            | 1.59 E-1                  | 18.052                  | 19.882                 | 20.239    | -0.600                 | Y      | ●                 |   |
|                 | <i>" sigma54 specific transcriptional regulator, Fis family [Methylobacillus flagellatus KT]637938731 YP_545923 ""</i>        |                              |                           |                         |                        |            |                                               |                              |                           |                         |                        |           |                        |        |                   |   |
| <b>MFLA1816</b> |                                                                                                                               | 0.000                        | 0.000                     |                         |                        |            |                                               | 0.000                        | 0.000                     |                         |                        |           |                        |        |                   |   |
|                 | <i>hypothetical protein [Methylobacillus flagellatus KT]637938732 YP_545924</i>                                               |                              |                           |                         |                        |            |                                               |                              |                           |                         |                        |           |                        |        |                   |   |

| ORF             | AM/OH <i>M. Flagellatus</i> Spectral Count                                                                                |                              |                           |                         |                        |            | AM/OH <i>M. Flagellatus</i> Protein Intensity |                              |                           |                         |                        |      | Consensus | Log <sub>2</sub> Ratio |
|-----------------|---------------------------------------------------------------------------------------------------------------------------|------------------------------|---------------------------|-------------------------|------------------------|------------|-----------------------------------------------|------------------------------|---------------------------|-------------------------|------------------------|------|-----------|------------------------|
|                 | q-value                                                                                                                   | log <sub>2</sub> Methylamine | log <sub>2</sub> Methanol | log <sub>2</sub> Sc Sum | log <sub>2</sub> Ratio | Regulation | q-value                                       | log <sub>2</sub> Methylamine | log <sub>2</sub> Methanol | log <sub>2</sub> PI Sum | log <sub>2</sub> Ratio |      |           |                        |
| <b>MFLA1817</b> | 7.21 E-2                                                                                                                  | 8.205                        | 8.181                     | 9.193                   | 0.015                  | Y ●● Y     | 1.66 E-2                                      | 27.784                       | 28.062                    | 28.930                  | -0.277                 | Y ●● |           |                        |
|                 | <i>Aconitate hydratase [Methylobacillus flagellatus KT]637938733 YP_545925</i>                                            |                              |                           |                         |                        |            |                                               |                              |                           |                         |                        |      |           |                        |
| <b>MFLA1818</b> | 0.000                                                                                                                     | 0.000                        |                           |                         |                        | ●●         |                                               | 0.000                        | 0.000                     |                         |                        |      | ●●        |                        |
|                 | <i>hypothetical protein [Methylobacillus flagellatus KT]637938734 YP_545926</i>                                           |                              |                           |                         |                        |            |                                               |                              |                           |                         |                        |      |           |                        |
| <b>MFLA1819</b> | 3.08 E-4                                                                                                                  | 7.618                        | 7.976                     | 8.808                   | -0.369                 | Y ●● Y     | 1.23 E-2                                      | 27.020                       | 28.185                    | 28.717                  | -1.233                 | Y ●● |           |                        |
|                 | <i>adenylosuccinate lyase [Methylobacillus flagellatus KT]637938735 YP_545927</i>                                         |                              |                           |                         |                        |            |                                               |                              |                           |                         |                        |      |           |                        |
| <b>MFLA1820</b> | 3.210                                                                                                                     | 4.056                        | 4.694                     | 4.694                   | -0.884                 | Y ●● Y     | 4.62 E-2                                      | 21.868                       | 22.666                    | 23.322                  | -0.944                 | Y ●● |           |                        |
|                 | <i>surface antigen (D15) [Methylobacillus flagellatus KT]637938736 YP_545928</i>                                          |                              |                           |                         |                        |            |                                               |                              |                           |                         |                        |      |           |                        |
| <b>MFLA1821</b> | 4.532                                                                                                                     | 4.373                        | 5.455                     | 5.455                   | 0.277                  | Y ●● Y     | 1.83 E-1                                      | 22.642                       | 23.086                    | 23.881                  | -0.634                 | Y ●● |           |                        |
|                 | <i>protein of unknown function DUF490 [Methylobacillus flagellatus KT]637938737 YP_545929</i>                             |                              |                           |                         |                        |            |                                               |                              |                           |                         |                        |      |           |                        |
| <b>MFLA1822</b> |                                                                                                                           | 3.945                        | 3.945                     | 3.945                   |                        | Y ●● Y     |                                               |                              | 23.660                    | 23.660                  |                        | Y ●● |           |                        |
|                 | <i>protein of unknown function DUF88 [Methylobacillus flagellatus KT]637938738 YP_545930</i>                              |                              |                           |                         |                        |            |                                               |                              |                           |                         |                        |      |           |                        |
| <b>MFLA1823</b> |                                                                                                                           | 0.000                        | 0.000                     | 0.000                   |                        | Y ●● Y     |                                               |                              | 18.843                    | 18.843                  |                        | Y ●● |           |                        |
|                 | <i>flavodoxin/nitric oxide synthase [Methylobacillus flagellatus KT]637938739 YP_545931</i>                               |                              |                           |                         |                        |            |                                               |                              |                           |                         |                        |      |           |                        |
| <b>MFLA1824</b> | 9.34 E-2                                                                                                                  | 6.065                        | 6.038                     | 7.051                   | -0.004                 | Y ●● Y     | 5.47 E-2                                      | 24.819                       | 25.234                    | 26.041                  | -0.424                 | Y ●● |           |                        |
|                 | <i>stationary-phase survival protein SurE [Methylobacillus flagellatus KT]637938740 YP_545932</i>                         |                              |                           |                         |                        |            |                                               |                              |                           |                         |                        |      |           |                        |
| <b>MFLA1825</b> | 4.974                                                                                                                     | 4.641                        | 5.817                     | 5.817                   | 0.337                  | Y ●● Y     | 1.92 E-1                                      | 23.235                       | 23.077                    | 24.158                  | 0.124                  | Y ●● |           |                        |
|                 | <i>protein-L-isoaspartate O-methyltransferase [Methylobacillus flagellatus KT]637938741 YP_545933</i>                     |                              |                           |                         |                        |            |                                               |                              |                           |                         |                        |      |           |                        |
| <b>MFLA1826</b> | 4.624                                                                                                                     | 5.013                        | 5.832                     | 5.832                   | -0.385                 | Y ●● Y     | 2.27 E-2                                      | 23.628                       | 24.481                    | 25.116                  | -0.915                 | Y ●● |           |                        |
|                 | <i>peptidase M23B [Methylobacillus flagellatus KT]637938742 YP_545934</i>                                                 |                              |                           |                         |                        |            |                                               |                              |                           |                         |                        |      |           |                        |
| <b>MFLA1827</b> | 0.000                                                                                                                     | 0.000                        |                           |                         |                        | ●●         |                                               | 0.000                        | 0.000                     |                         |                        |      | ●●        |                        |
|                 | <i>hypothetical protein [Methylobacillus flagellatus KT]637938743 YP_545935</i>                                           |                              |                           |                         |                        |            |                                               |                              |                           |                         |                        |      |           |                        |
| <b>MFLA1828</b> | 3.580                                                                                                                     | 1.322                        | 3.854                     | 3.854                   | 0.988                  | Y ●● Y     | 2.72 E-1                                      | 22.822                       | 21.790                    | 23.396                  | -0.227                 | Y ●● |           |                        |
|                 | <i>thioredoxin-related [Methylobacillus flagellatus KT]637938744 YP_545936</i>                                            |                              |                           |                         |                        |            |                                               |                              |                           |                         |                        |      |           |                        |
| <b>MFLA1829</b> | 2.03 E-2                                                                                                                  | 5.725                        | 6.229                     | 6.999                   | -0.504                 | Y ●● Y     | 4.08 E-2                                      | 26.711                       | 27.615                    | 28.233                  | -0.992                 | Y ●● |           |                        |
|                 | <i>nitroreductase [Methylobacillus flagellatus KT]637938745 YP_545937</i>                                                 |                              |                           |                         |                        |            |                                               |                              |                           |                         |                        |      |           |                        |
| <b>MFLA1830</b> | 8.090                                                                                                                     | 7.343                        | 8.764                     | 8.764                   | 0.761                  | Y ●● Y     | 2.66 E-1                                      | 25.857                       | 25.886                    | 26.872                  | -0.080                 | Y ●● |           |                        |
|                 | <i>NADH:flavin oxidoreductase/NADH oxidase [Methylobacillus flagellatus KT]637938746 YP_545938</i>                        |                              |                           |                         |                        |            |                                               |                              |                           |                         |                        |      |           |                        |
| <b>MFLA1831</b> | 2.99 E-2                                                                                                                  | 6.762                        | 7.088                     | 7.934                   | -0.327                 | Y ●● Y     | 2.67 E-1                                      | 26.740                       | 26.689                    | 27.715                  | 0.070                  | Y ●● |           |                        |
|                 | <i>YceI [Methylobacillus flagellatus KT]637938747 YP_545939</i>                                                           |                              |                           |                         |                        |            |                                               |                              |                           |                         |                        |      |           |                        |
| <b>MFLA1832</b> |                                                                                                                           | 4.125                        | 4.125                     | 4.125                   |                        | Y ●● Y     |                                               |                              | 22.840                    | 22.840                  |                        | Y ●● |           |                        |
|                 | <i>NADPH-dependent FMN reductase [Methylobacillus flagellatus KT]637938748 YP_545940</i>                                  |                              |                           |                         |                        |            |                                               |                              |                           |                         |                        |      |           |                        |
| <b>MFLA1833</b> | 1.106                                                                                                                     |                              | 1.106                     | 1.106                   |                        | Y ●● Y     |                                               | 19.141                       |                           | 19.141                  |                        | Y ●● |           |                        |
|                 | <i>Pirin-like protein [Methylobacillus flagellatus KT]637938749 YP_545941</i>                                             |                              |                           |                         |                        |            |                                               |                              |                           |                         |                        |      |           |                        |
| <b>MFLA1834</b> | 0.000                                                                                                                     | 0.000                        |                           |                         |                        | ●●         |                                               | 0.000                        | 0.000                     |                         |                        |      | ●●        |                        |
|                 | <i>protein of unknown function DUF540 [Methylobacillus flagellatus KT]637938750 YP_545942</i>                             |                              |                           |                         |                        |            |                                               |                              |                           |                         |                        |      |           |                        |
| <b>MFLA1835</b> | 0.521                                                                                                                     | 0.585                        | 1.553                     | 1.553                   | -0.064                 | Y ●● Y     |                                               | 22.106                       | 20.006                    | 22.409                  | 2.101                  | Y ●● |           |                        |
|                 | <i>" transcriptional regulator, LysR family [Methylobacillus flagellatus KT]637938751 YP_545943 ""</i>                    |                              |                           |                         |                        |            |                                               |                              |                           |                         |                        |      |           |                        |
| <b>MFLA1836</b> | 0.000                                                                                                                     | 0.000                        |                           |                         |                        | ●●         |                                               | 0.000                        | 0.000                     |                         |                        |      | ●●        |                        |
|                 | <i>hypothetical protein [Methylobacillus flagellatus KT]637938752 YP_545944</i>                                           |                              |                           |                         |                        |            |                                               |                              |                           |                         |                        |      |           |                        |
| <b>MFLA1837</b> | 4.757                                                                                                                     | 4.641                        | 5.700                     | 5.700                   | 0.086                  | Y ●● Y     | 2.59 E-1                                      | 23.087                       | 23.016                    | 24.052                  | -0.074                 | Y ●● |           |                        |
|                 | <i>" ATPase associated with various cellular activities, AAA_3 [Methylobacillus flagellatus KT]637938753 YP_545945 ""</i> |                              |                           |                         |                        |            |                                               |                              |                           |                         |                        |      |           |                        |
| <b>MFLA1838</b> | 0.000                                                                                                                     | 0.000                        |                           |                         |                        | ●●         |                                               | 0.000                        | 0.000                     |                         |                        |      | ●●        |                        |
|                 | <i>protein of unknown function DUF58 [Methylobacillus flagellatus KT]637938754 YP_545946</i>                              |                              |                           |                         |                        |            |                                               |                              |                           |                         |                        |      |           |                        |



| ORF             | AM/OH <i>M. Flagellatus</i> Spectral Count                                                                                      |                              |                           |                         |                        |            | AM/OH <i>M. Flagellatus</i> Protein Intensity |                              |                           |                         |                        |           | Spectral Count         |  | Protein Intensity |  |
|-----------------|---------------------------------------------------------------------------------------------------------------------------------|------------------------------|---------------------------|-------------------------|------------------------|------------|-----------------------------------------------|------------------------------|---------------------------|-------------------------|------------------------|-----------|------------------------|--|-------------------|--|
|                 | <i>q</i> -value                                                                                                                 | log <sub>2</sub> Methylamine | log <sub>2</sub> Methanol | log <sub>2</sub> Sc Sum | log <sub>2</sub> Ratio | Regulation | <i>q</i> -value                               | log <sub>2</sub> Methylamine | log <sub>2</sub> Methanol | log <sub>2</sub> PI Sum | log <sub>2</sub> Ratio | Consensus | Log <sub>2</sub> Ratio |  |                   |  |
| <b>MFLA1839</b> |                                                                                                                                 | 2.106                        |                           | 2.106                   |                        | Y ●● Y     |                                               | 19.211                       |                           | 19.211                  |                        | Y ●       |                        |  |                   |  |
|                 | <i>transglutaminase-like protein [Methylobacillus flagellatus KT]637938755 YP_545947</i>                                        |                              |                           |                         |                        |            |                                               |                              |                           |                         |                        |           |                        |  |                   |  |
| <b>MFLA1840</b> |                                                                                                                                 | 1.674                        |                           | 1.674                   |                        | Y ●● Y     |                                               | 19.665                       |                           | 19.665                  |                        | Y ●       |                        |  |                   |  |
|                 | <i>" CMP/dCMP deaminase, zinc-binding [Methylobacillus flagellatus KT]637938756 YP_545948 ""</i>                                |                              |                           |                         |                        |            |                                               |                              |                           |                         |                        |           |                        |  |                   |  |
| <b>MFLA1841</b> |                                                                                                                                 | 0.000                        | 0.000                     |                         |                        | ■ ■        |                                               | 0.000                        |                           | 0.000                   |                        | ■         |                        |  |                   |  |
|                 | <i>hypothetical protein [Methylobacillus flagellatus KT]637938757 YP_545949</i>                                                 |                              |                           |                         |                        |            |                                               |                              |                           |                         |                        |           |                        |  |                   |  |
| <b>MFLA1842</b> |                                                                                                                                 | 0.000                        | 0.000                     |                         |                        | ■ ■        |                                               | 0.000                        |                           | 0.000                   |                        | ■         |                        |  |                   |  |
|                 | <i>Rhomboid-like protein [Methylobacillus flagellatus KT]637938758 YP_545950</i>                                                |                              |                           |                         |                        |            |                                               |                              |                           |                         |                        |           |                        |  |                   |  |
| <b>MFLA1843</b> |                                                                                                                                 | 0.000                        | 0.000                     |                         |                        | ■ ■        |                                               | 0.000                        |                           | 0.000                   |                        | ■         |                        |  |                   |  |
|                 | <i>protein of unknown function UPF0005 [Methylobacillus flagellatus KT]637938759 YP_545951</i>                                  |                              |                           |                         |                        |            |                                               |                              |                           |                         |                        |           |                        |  |                   |  |
| <b>MFLA1844</b> |                                                                                                                                 | 0.000                        | 0.000                     |                         |                        | ■ ■        |                                               | 0.000                        |                           | 0.000                   |                        | ■         |                        |  |                   |  |
|                 | <i>protein of unknown function DUF1555 [Methylobacillus flagellatus KT]637938760 YP_545952</i>                                  |                              |                           |                         |                        |            |                                               |                              |                           |                         |                        |           |                        |  |                   |  |
| <b>MFLA1845</b> | 4.72 E-2                                                                                                                        | 5.169                        | 4.766                     | 5.982                   | 0.395                  | Y ●● Y     | 1.87 E-1                                      | 23.637                       | 23.771                    | 24.706                  | -0.168                 | Y ●       |                        |  |                   |  |
|                 | <i>Beta-N-acetylhexosaminidase [Methylobacillus flagellatus KT]637938761 YP_545953</i>                                          |                              |                           |                         |                        |            |                                               |                              |                           |                         |                        |           |                        |  |                   |  |
| <b>MFLA1846</b> |                                                                                                                                 | 0.000                        | 0.000                     |                         |                        | ■ ■        |                                               | 0.000                        |                           | 0.000                   |                        | ■         |                        |  |                   |  |
|                 | <i>protein of unknown function DUF165 [Methylobacillus flagellatus KT]637938762 YP_545954</i>                                   |                              |                           |                         |                        |            |                                               |                              |                           |                         |                        |           |                        |  |                   |  |
| <b>MFLA1847</b> |                                                                                                                                 | 0.000                        | 0.000                     |                         |                        | ■ ■        |                                               | 0.000                        |                           | 0.000                   |                        | ■         |                        |  |                   |  |
|                 | <i>binding-protein-dependent transport systems inner membrane component [Methylobacillus flagellatus KT]637938763 YP_545955</i> |                              |                           |                         |                        |            |                                               |                              |                           |                         |                        |           |                        |  |                   |  |
| <b>MFLA1848</b> |                                                                                                                                 | 0.000                        | 0.000                     |                         |                        | ■ ■        |                                               | 0.000                        |                           | 0.000                   |                        | ■         |                        |  |                   |  |
|                 | <i>binding-protein-dependent transport systems inner membrane component [Methylobacillus flagellatus KT]637938764 YP_545956</i> |                              |                           |                         |                        |            |                                               |                              |                           |                         |                        |           |                        |  |                   |  |
| <b>MFLA1849</b> | 2.761                                                                                                                           | 1.346                        | 3.220                     | 0.224                   | Y ●● Y                 | 1.3 E-1    | 19.939                                        | 19.654                       | 20.803                    | -0.939                  | Y ●                    |           |                        |  |                   |  |
|                 | <i>ErkK/YbiS/YcfS/YnhG [Methylobacillus flagellatus KT]637938765 YP_545957</i>                                                  |                              |                           |                         |                        |            |                                               |                              |                           |                         |                        |           |                        |  |                   |  |
| <b>MFLA1850</b> | 4.391                                                                                                                           | 4.471                        | 5.431                     | -0.094                  | Y ●● Y                 | 1.6 E-1    | 22.709                                        | 22.247                       | 23.497                    | 0.224                   | Y ●                    |           |                        |  |                   |  |
|                 | <i>" extracellular solute-binding protein, family 5 [Methylobacillus flagellatus KT]637938766 YP_545958 ""</i>                  |                              |                           |                         |                        |            |                                               |                              |                           |                         |                        |           |                        |  |                   |  |
| <b>MFLA1851</b> | 1.42 E-2                                                                                                                        | 5.167                        | 4.788                     | 5.990                   | 0.303                  | Y ●● Y     | 1.73 E-1                                      | 24.007                       | 23.579                    | 24.809                  | 0.143                  | Y ●       |                        |  |                   |  |
|                 | <i>" RNA methyltransferase, TrmA family [Methylobacillus flagellatus KT]637938767 YP_545959 ""</i>                              |                              |                           |                         |                        |            |                                               |                              |                           |                         |                        |           |                        |  |                   |  |
| <b>MFLA1852</b> | 3.726                                                                                                                           | 4.261                        | 5.018                     | -1.091                  | Y ●● Y                 | 7.9 E-2    | 23.018                                        | 23.700                       | 24.399                    | -0.924                  | Y ●                    |           |                        |  |                   |  |
|                 | <i>hypothetical protein [Methylobacillus flagellatus KT]637938768 YP_545960</i>                                                 |                              |                           |                         |                        |            |                                               |                              |                           |                         |                        |           |                        |  |                   |  |
| <b>MFLA1853</b> | 3.552                                                                                                                           | 2.844                        | 4.241                     | 0.710                   | Y ●● Y                 | 2.02 E-1   | 22.595                                        | 22.751                       | 23.675                    | -0.074                  | Y ●                    |           |                        |  |                   |  |
|                 | <i>hypothetical protein [Methylobacillus flagellatus KT]637938769 YP_545961</i>                                                 |                              |                           |                         |                        |            |                                               |                              |                           |                         |                        |           |                        |  |                   |  |
| <b>MFLA1854</b> | 0.813                                                                                                                           |                              | 0.813                     |                         | Y ●● Y                 |            | 23.707                                        |                              | 23.707                    |                         | Y ●                    |           |                        |  |                   |  |
|                 | <i>hypothetical protein [Methylobacillus flagellatus KT]637938770 YP_545962</i>                                                 |                              |                           |                         |                        |            |                                               |                              |                           |                         |                        |           |                        |  |                   |  |
| <b>MFLA1855</b> | 0.000                                                                                                                           | 0.000                        |                           |                         | ■ ■                    |            | 0.000                                         |                              | 0.000                     |                         | ■                      |           |                        |  |                   |  |
|                 | <i>" putative transcriptional regulator, CopG family [Methylobacillus flagellatus KT]637938771 YP_545963 ""</i>                 |                              |                           |                         |                        |            |                                               |                              |                           |                         |                        |           |                        |  |                   |  |
| <b>MFLA1856</b> | 0.000                                                                                                                           | 0.000                        |                           |                         | ■ ■                    |            | 0.000                                         |                              | 0.000                     |                         | ■                      |           |                        |  |                   |  |
|                 | <i>Glutamate--ammonia ligase [Methylobacillus flagellatus KT]637938772 YP_545964</i>                                            |                              |                           |                         |                        |            |                                               |                              |                           |                         |                        |           |                        |  |                   |  |
| <b>MFLA1857</b> | 0.000                                                                                                                           | 0.000                        |                           |                         | ■ ■                    |            | 0.000                                         |                              | 0.000                     |                         | ■                      |           |                        |  |                   |  |
|                 | <i>ABC transporter related [Methylobacillus flagellatus KT]637938773 YP_545965</i>                                              |                              |                           |                         |                        |            |                                               |                              |                           |                         |                        |           |                        |  |                   |  |
| <b>MFLA1858</b> | 0.000                                                                                                                           | 0.000                        |                           |                         | ■ ■                    |            | 0.000                                         |                              | 0.000                     |                         | ■                      |           |                        |  |                   |  |
|                 | <i>binding-protein-dependent transport systems inner membrane component [Methylobacillus flagellatus KT]637938774 YP_545966</i> |                              |                           |                         |                        |            |                                               |                              |                           |                         |                        |           |                        |  |                   |  |
| <b>MFLA1859</b> | 0.000                                                                                                                           | 0.000                        |                           |                         | ■ ■                    |            | 0.000                                         |                              | 0.000                     |                         | ■                      |           |                        |  |                   |  |
|                 | <i>ABC transport system substrate-binding protein [Methylobacillus flagellatus KT]637938775 YP_545967</i>                       |                              |                           |                         |                        |            |                                               |                              |                           |                         |                        |           |                        |  |                   |  |
| <b>MFLA1860</b> | 0.000                                                                                                                           | 0.000                        |                           |                         | ■ ■                    |            | 0.000                                         |                              | 0.000                     |                         | ■                      |           |                        |  |                   |  |
|                 | <i>hypothetical protein [Methylobacillus flagellatus KT]637938776 YP_545968</i>                                                 |                              |                           |                         |                        |            |                                               |                              |                           |                         |                        |           |                        |  |                   |  |



AM/OH *M. Flagellatus* Spectral Count

AM/OH *M. Flagellatus* Protein Intensity

| ORF             | AM/OH <i>M. Flagellatus</i> Spectral Count                                                                                         |                              |                           |                         |                        | AM/OH <i>M. Flagellatus</i> Protein Intensity |          |                              |                           |                         | Consensus | Log <sub>2</sub> Ratio |                        |
|-----------------|------------------------------------------------------------------------------------------------------------------------------------|------------------------------|---------------------------|-------------------------|------------------------|-----------------------------------------------|----------|------------------------------|---------------------------|-------------------------|-----------|------------------------|------------------------|
|                 | q-value                                                                                                                            | log <sub>2</sub> Methylamine | log <sub>2</sub> Methanol | log <sub>2</sub> Sc Sum | log <sub>2</sub> Ratio | Regulation                                    | q-value  | log <sub>2</sub> Methylamine | log <sub>2</sub> Methanol | log <sub>2</sub> PI Sum |           |                        | log <sub>2</sub> Ratio |
| <b>MFLA1861</b> | 1.08 E-1                                                                                                                           | 5.004                        | 5.117                     | 6.061                   | -0.117                 | Y ●● Y                                        | 2.05 E-2 | 24.335                       | 25.039                    | 25.729                  | -0.729    | Y ●●                   |                        |
|                 | <i>cysteine synthase B [Methylobacillus flagellatus KT]637938777 YP_545969</i>                                                     |                              |                           |                         |                        |                                               |          |                              |                           |                         |           |                        |                        |
| <b>MFLA1862</b> |                                                                                                                                    | 2.739                        |                           | 2.739                   |                        | Y ●● Y                                        |          |                              | 20.712                    | 20.712                  |           | Y ●●                   |                        |
|                 | <i>Disulphide bond formation protein DsbB [Methylobacillus flagellatus KT]637938778 YP_545970</i>                                  |                              |                           |                         |                        |                                               |          |                              |                           |                         |           |                        |                        |
| <b>MFLA1863</b> | 2.980                                                                                                                              | 3.261                        | 4.127                     | 0.722                   | Y ●● Y                 | 8.42 E-2                                      | 19.049   | 21.706                       | 21.918                    | -1.608                  | Y ●●      |                        |                        |
|                 | <i>" exodeoxyribonuclease VII, large subunit [Methylobacillus flagellatus KT]637938779 YP_545971 ""</i>                            |                              |                           |                         |                        |                                               |          |                              |                           |                         |           |                        |                        |
| <b>MFLA1864</b> |                                                                                                                                    | 1.322                        |                           | 1.322                   |                        | Y ●● Y                                        |          |                              | 19.954                    | 19.954                  |           | Y ●●                   |                        |
|                 | <i>TfoX-like protein [Methylobacillus flagellatus KT]637938780 YP_545972</i>                                                       |                              |                           |                         |                        |                                               |          |                              |                           |                         |           |                        |                        |
| <b>MFLA1865</b> | 4.960                                                                                                                              | 4.431                        | 5.720                     | 0.442                   | Y ●● Y                 | 2.13 E-1                                      | 24.613   | 24.791                       | 25.705                    | -0.099                  | Y ●●      |                        |                        |
|                 | <i>" peptidase M48, Ste24p [Methylobacillus flagellatus KT]637938781 YP_545973 ""</i>                                              |                              |                           |                         |                        |                                               |          |                              |                           |                         |           |                        |                        |
| <b>MFLA1866</b> | 0                                                                                                                                  | 9.075                        | 10.162                    | 10.718                  | -1.090                 | G ●● G                                        | 7.38 E-3 | 26.760                       | 28.757                    | 29.079                  | -2.003    | G ●●                   |                        |
|                 | <i>" 2,3,4,5-tetrahydropyridine-2,6-dicarboxylate N-succinyltransferase [Methylobacillus flagellatus KT]637938782 YP_545974 ""</i> |                              |                           |                         |                        |                                               |          |                              |                           |                         |           |                        |                        |
| <b>MFLA1867</b> |                                                                                                                                    | 2.095                        |                           | 2.095                   |                        | Y ●● Y                                        |          |                              | 21.120                    | 21.120                  |           | Y ●●                   |                        |
|                 | <i>diguanylate cyclase/phosphodiesterase (GGDEF &amp; EAL domains) [Methylobacillus flagellatus KT]637938783 YP_545975</i>         |                              |                           |                         |                        |                                               |          |                              |                           |                         |           |                        |                        |
| <b>MFLA1868</b> | 3.937                                                                                                                              | 4.526                        | 5.261                     | -0.641                  | Y ●● Y                 | 3.98 E-2                                      | 22.955   | 24.146                       | 24.670                    | -1.621                  | Y ●●      |                        |                        |
|                 | <i>hypothetical protein [Methylobacillus flagellatus KT]637938784 YP_545976</i>                                                    |                              |                           |                         |                        |                                               |          |                              |                           |                         |           |                        |                        |
| <b>MFLA1869</b> | 1.15 E-1                                                                                                                           | 4.604                        | 5.233                     | 5.953                   | -1.121                 | Y ●● Y                                        | 2.34 E-2 | 22.136                       | 23.957                    | 24.317                  | -2.363    | Y ●●                   |                        |
|                 | <i>succinyl-diaminopimelate desuccinylase [Methylobacillus flagellatus KT]637938785 YP_545977</i>                                  |                              |                           |                         |                        |                                               |          |                              |                           |                         |           |                        |                        |
| <b>MFLA1870</b> | 3.691                                                                                                                              | 5.366                        | 5.759                     | -0.671                  | Y ●● Y                 | 1.44 E-1                                      | 22.826   | 24.116                       | 24.610                    | -0.267                  | Y ●●      |                        |                        |
|                 | <i>" modification methylase, HemK family [Methylobacillus flagellatus KT]637938786 YP_545978 ""</i>                                |                              |                           |                         |                        |                                               |          |                              |                           |                         |           |                        |                        |
| <b>MFLA1871</b> | 0.000                                                                                                                              | 0.000                        |                           |                         |                        | ●●                                            | 0.000    | 0.000                        |                           |                         |           | ●●                     |                        |
|                 | <i>protein of unknown function DUF202 [Methylobacillus flagellatus KT]637938787 YP_545979</i>                                      |                              |                           |                         |                        |                                               |          |                              |                           |                         |           |                        |                        |
| <b>MFLA1872</b> | 4.470                                                                                                                              | 4.370                        | 5.421                     | -0.352                  | Y ●● Y                 | 1.69 E-1                                      | 22.151   | 22.607                       | 23.397                    | -1.159                  | Y ●●      |                        |                        |
|                 | <i>" Pseudouridine synthase, Rsu [Methylobacillus flagellatus KT]637938788 YP_545980 ""</i>                                        |                              |                           |                         |                        |                                               |          |                              |                           |                         |           |                        |                        |
| <b>MFLA1873</b> |                                                                                                                                    | 0.346                        |                           | 0.346                   |                        | Y ●● Y                                        |          |                              | 19.695                    | 19.695                  |           | Y ●●                   |                        |
|                 | <i>putative transcriptional regulator [Methylobacillus flagellatus KT]637938789 YP_545981</i>                                      |                              |                           |                         |                        |                                               |          |                              |                           |                         |           |                        |                        |
| <b>MFLA1874</b> | 0.000                                                                                                                              | 0.000                        |                           |                         |                        | ●●                                            | 0.000    | 0.000                        |                           |                         |           | ●●                     |                        |
|                 | <i>chromosome segregation and condensation protein ScpA [Methylobacillus flagellatus KT]637938790 YP_545982</i>                    |                              |                           |                         |                        |                                               |          |                              |                           |                         |           |                        |                        |
| <b>MFLA1875</b> | 0.000                                                                                                                              | 0.000                        |                           |                         |                        | ●●                                            | 0.000    | 0.000                        |                           |                         |           | ●●                     |                        |
|                 | <i>peptidase M50 [Methylobacillus flagellatus KT]637938791 YP_545983</i>                                                           |                              |                           |                         |                        |                                               |          |                              |                           |                         |           |                        |                        |
| <b>MFLA1876</b> | 4.128                                                                                                                              | 4.869                        | 5.545                     | -0.943                  | Y ●● Y                 | 6.37 E-2                                      | 24.523   | 25.235                       | 25.923                    | -0.893                  | Y ●●      |                        |                        |
|                 | <i>Sua5/YciO/YrdC/YwIC [Methylobacillus flagellatus KT]637938792 YP_545984</i>                                                     |                              |                           |                         |                        |                                               |          |                              |                           |                         |           |                        |                        |
| <b>MFLA1877</b> |                                                                                                                                    | 2.543                        |                           | 2.543                   |                        | Y ●● Y                                        |          |                              | 20.434                    | 20.434                  |           | Y ●●                   |                        |
|                 | <i>PHP-like protein [Methylobacillus flagellatus KT]637938793 YP_545985</i>                                                        |                              |                           |                         |                        |                                               |          |                              |                           |                         |           |                        |                        |
| <b>MFLA1878</b> | 0.000                                                                                                                              | 0.000                        |                           |                         |                        | ●●                                            | 0.000    | 0.000                        |                           |                         |           | ●●                     |                        |
|                 | <i>intracellular septation protein A [Methylobacillus flagellatus KT]637938794 YP_545986</i>                                       |                              |                           |                         |                        |                                               |          |                              |                           |                         |           |                        |                        |
| <b>MFLA1879</b> | 3.608                                                                                                                              | 2.806                        | 4.262                     | 0.802                   | Y ●● Y                 |                                               | 20.648   | 21.114                       | 21.900                    | -0.466                  | Y ●●      |                        |                        |
|                 | <i>YCII-related [Methylobacillus flagellatus KT]637938795 YP_545987</i>                                                            |                              |                           |                         |                        |                                               |          |                              |                           |                         |           |                        |                        |
| <b>MFLA1880</b> |                                                                                                                                    | 0.000                        |                           | 0.000                   |                        | Y ●● Y                                        |          |                              | 20.543                    | 20.543                  |           | Y ●●                   |                        |
|                 | <i>BolA-like protein [Methylobacillus flagellatus KT]637938796 YP_545988</i>                                                       |                              |                           |                         |                        |                                               |          |                              |                           |                         |           |                        |                        |
| <b>MFLA1881</b> | 8.541                                                                                                                              | 8.732                        | 9.640                     | -0.161                  | Y ●● Y                 | 1.55 E-1                                      | 28.952   | 28.805                       | 29.880                    | 0.132                   | Y ●●      |                        |                        |
|                 | <i>PpiC-type peptidyl-prolyl cis-trans isomerase [Methylobacillus flagellatus KT]637938797 YP_545989</i>                           |                              |                           |                         |                        |                                               |          |                              |                           |                         |           |                        |                        |
| <b>MFLA1882</b> | 4.080                                                                                                                              | 4.473                        | 5.290                     | -0.434                  | Y ●● G                 | 4.1 E-3                                       | 19.859   | 23.278                       | 23.407                    | -3.661                  | G ●●      |                        |                        |
|                 | <i>peptidase M61 [Methylobacillus flagellatus KT]637938798 YP_545990</i>                                                           |                              |                           |                         |                        |                                               |          |                              |                           |                         |           |                        |                        |



| ORF             | AM/OH <i>M. Flagellatus</i> Spectral Count                                                                                |                              |                           |                         |                        | AM/OH <i>M. Flagellatus</i> Protein Intensity |          |                              |                           |                         | Spectral Count         |           | Protein Intensity |  | Log <sub>2</sub> Ratio |
|-----------------|---------------------------------------------------------------------------------------------------------------------------|------------------------------|---------------------------|-------------------------|------------------------|-----------------------------------------------|----------|------------------------------|---------------------------|-------------------------|------------------------|-----------|-------------------|--|------------------------|
|                 | q-value                                                                                                                   | log <sub>2</sub> Methylamine | log <sub>2</sub> Methanol | log <sub>2</sub> Sc Sum | log <sub>2</sub> Ratio | Regulation                                    | q-value  | log <sub>2</sub> Methylamine | log <sub>2</sub> Methanol | log <sub>2</sub> PI Sum | log <sub>2</sub> Ratio | Consensus |                   |  |                        |
| <b>MFLA1883</b> | 6.28 E-5                                                                                                                  | 6.104                        | 5.247                     | 6.738                   | 0.900                  | R ●● Y                                        | 1.86 E-1 | 23.359                       | 23.019                    | 24.199                  | 0.159                  | R ●●      |                   |  |                        |
|                 | <i>iron permease FTR1 [Methylobacillus flagellatus KT]637938799 YP_545991</i>                                             |                              |                           |                         |                        |                                               |          |                              |                           |                         |                        |           |                   |  |                        |
| <b>MFLA1884</b> |                                                                                                                           | 1.398                        | 4.410                     | 4.579                   | -1.975                 | Y ●● Y                                        | 1.23 E-2 | 23.634                       | 23.306                    | 24.479                  | 1.329                  | Y ●●      |                   |  |                        |
|                 | <i>Glyoxalase/bleomycin resistance protein/dioxygenase [Methylobacillus flagellatus KT]637938800 YP_545992</i>            |                              |                           |                         |                        |                                               |          |                              |                           |                         |                        |           |                   |  |                        |
| <b>MFLA1885</b> |                                                                                                                           | 6.957                        | 7.443                     | 8.221                   | -0.516                 | Y ●● Y                                        | 1.33 E-1 | 27.902                       | 28.198                    | 29.058                  | -0.290                 | Y ●●      |                   |  |                        |
|                 | <i>" nitrogen regulatory protein P-II (GlnB, GlnK) [Methylobacillus flagellatus KT]637938801 YP_545993 ""</i>             |                              |                           |                         |                        |                                               |          |                              |                           |                         |                        |           |                   |  |                        |
| <b>MFLA1886</b> |                                                                                                                           | 4.271                        | 4.230                     | 5.251                   | 0.027                  | Y ●● G                                        | 8.9 E-3  | 22.699                       | 23.528                    | 24.172                  | -0.826                 | Y ●●      |                   |  |                        |
|                 | <i>NAD+ synthetase [Methylobacillus flagellatus KT]637938802 YP_545994</i>                                                |                              |                           |                         |                        |                                               |          |                              |                           |                         |                        |           |                   |  |                        |
| <b>MFLA1887</b> | 1.3 E-2                                                                                                                   | 6.263                        | 6.225                     | 7.244                   | -0.040                 | Y ●● Y                                        | 1.03 E-1 | 25.040                       | 25.329                    | 26.192                  | -0.311                 | Y ●●      |                   |  |                        |
|                 | <i>Ankyrin [Methylobacillus flagellatus KT]637938803 YP_545995</i>                                                        |                              |                           |                         |                        |                                               |          |                              |                           |                         |                        |           |                   |  |                        |
| <b>MFLA1888</b> |                                                                                                                           | 7.239                        | 6.321                     | 7.852                   | 0.742                  | Y ●● Y                                        | 1.23 E-1 | 25.004                       | 25.252                    | 26.133                  | -0.286                 | Y ●●      |                   |  |                        |
|                 | <i>" succinyl-CoA synthetase, alpha subunit [Methylobacillus flagellatus KT]637938804 YP_545996 ""</i>                    |                              |                           |                         |                        |                                               |          |                              |                           |                         |                        |           |                   |  |                        |
| <b>MFLA1889</b> | 8.81 E-2                                                                                                                  | 6.502                        | 6.742                     | 7.627                   | -0.243                 | Y ●● Y                                        | 1.13 E-2 | 25.674                       | 26.549                    | 27.176                  | -0.877                 | Y ●●      |                   |  |                        |
|                 | <i>" succinyl-CoA synthetase, beta subunit [Methylobacillus flagellatus KT]637938805 YP_545997 ""</i>                     |                              |                           |                         |                        |                                               |          |                              |                           |                         |                        |           |                   |  |                        |
| <b>MFLA1890</b> |                                                                                                                           | 2.710                        | 3.915                     | 4.435                   | -1.214                 | Y ●● Y                                        | 3.18 E-2 | 22.537                       | 24.037                    | 24.474                  | -1.946                 | Y ●●      |                   |  |                        |
|                 | <i>phosphoserine phosphatase SerB [Methylobacillus flagellatus KT]637938806 YP_545998</i>                                 |                              |                           |                         |                        |                                               |          |                              |                           |                         |                        |           |                   |  |                        |
| <b>MFLA1891</b> |                                                                                                                           | 7.902                        | 6.882                     | 8.480                   | 1.187                  | Y ●● Y                                        | 1.62 E-1 | 24.703                       | 24.931                    | 25.821                  | -0.170                 | Y ●●      |                   |  |                        |
|                 | <i>" peptidyl-prolyl cis-trans isomerase, cyclophilin type [Methylobacillus flagellatus KT]637938807 YP_545999 ""</i>     |                              |                           |                         |                        |                                               |          |                              |                           |                         |                        |           |                   |  |                        |
| <b>MFLA1892</b> |                                                                                                                           |                              | 1.807                     | 1.807                   |                        | Y ●● Y                                        |          |                              | 19.846                    | 19.846                  |                        | Y ●●      |                   |  |                        |
|                 | <i>" transcriptional regulator, GntR family [Methylobacillus flagellatus KT]637938808 YP_546000 ""</i>                    |                              |                           |                         |                        |                                               |          |                              |                           |                         |                        |           |                   |  |                        |
| <b>MFLA1893</b> | 0                                                                                                                         | 8.310                        | 7.283                     | 8.886                   | 1.028                  | R ●● Y                                        | 2.74 E-2 | 27.529                       | 26.831                    | 28.222                  | 0.680                  | R ●●      |                   |  |                        |
|                 | <i>beta-ketoacyl synthase [Methylobacillus flagellatus KT]637938809 YP_546001</i>                                         |                              |                           |                         |                        |                                               |          |                              |                           |                         |                        |           |                   |  |                        |
| <b>MFLA1894</b> | 8.21 E-8                                                                                                                  | 4.731                        | 5.978                     | 6.485                   | -1.375                 | G ●● Y                                        | 1.12 E-2 | 23.376                       | 25.496                    | 25.794                  | -2.675                 | G ●●      |                   |  |                        |
|                 | <i>beta-hydroxyacyl-(acyl-carrier-protein) dehydratase FabA [Methylobacillus flagellatus KT]637938810 YP_546002</i>       |                              |                           |                         |                        |                                               |          |                              |                           |                         |                        |           |                   |  |                        |
| <b>MFLA1895</b> |                                                                                                                           | 0.000                        | 0.000                     |                         |                        | ●●                                            |          | 0.000                        | 0.000                     |                         |                        | ●●        |                   |  |                        |
|                 | <i>" ATPase associated with various cellular activities, AAA_3 [Methylobacillus flagellatus KT]637938811 YP_546003 ""</i> |                              |                           |                         |                        |                                               |          |                              |                           |                         |                        |           |                   |  |                        |
| <b>MFLA1896</b> |                                                                                                                           | 0.000                        | 0.000                     |                         |                        | ●●                                            |          | 0.000                        | 0.000                     |                         |                        | ●●        |                   |  |                        |
|                 | <i>hypothetical protein [Methylobacillus flagellatus KT]637938812 YP_546004</i>                                           |                              |                           |                         |                        |                                               |          |                              |                           |                         |                        |           |                   |  |                        |
| <b>MFLA1897</b> |                                                                                                                           | 0.000                        | 0.000                     |                         |                        | ●●                                            |          | 0.000                        | 0.000                     |                         |                        | ●●        |                   |  |                        |
|                 | <i>hypothetical protein [Methylobacillus flagellatus KT]637938813 YP_546005</i>                                           |                              |                           |                         |                        |                                               |          |                              |                           |                         |                        |           |                   |  |                        |
| <b>MFLA1898</b> |                                                                                                                           | 0.000                        | 0.000                     |                         |                        | ●●                                            |          | 0.000                        | 0.000                     |                         |                        | ●●        |                   |  |                        |
|                 | <i>" von Willebrand factor, type A [Methylobacillus flagellatus KT]637938814 YP_546006 ""</i>                             |                              |                           |                         |                        |                                               |          |                              |                           |                         |                        |           |                   |  |                        |
| <b>MFLA1899</b> |                                                                                                                           | 0.000                        | 0.000                     |                         |                        | ●●                                            |          | 0.000                        | 0.000                     |                         |                        | ●●        |                   |  |                        |
|                 | <i>hypothetical protein [Methylobacillus flagellatus KT]637938815 YP_546007</i>                                           |                              |                           |                         |                        |                                               |          |                              |                           |                         |                        |           |                   |  |                        |
| <b>MFLA1900</b> |                                                                                                                           | 0.000                        | 0.000                     |                         |                        | ●●                                            |          | 0.000                        | 0.000                     |                         |                        | ●●        |                   |  |                        |
|                 | <i>" von Willebrand factor, type A [Methylobacillus flagellatus KT]637938816 YP_546008 ""</i>                             |                              |                           |                         |                        |                                               |          |                              |                           |                         |                        |           |                   |  |                        |
| <b>MFLA1901</b> |                                                                                                                           | 0.000                        | 0.000                     |                         |                        | ●●                                            |          | 0.000                        | 0.000                     |                         |                        | ●●        |                   |  |                        |
|                 | <i>hypothetical protein [Methylobacillus flagellatus KT]637938817 YP_546009</i>                                           |                              |                           |                         |                        |                                               |          |                              |                           |                         |                        |           |                   |  |                        |
| <b>MFLA1902</b> |                                                                                                                           | 1.521                        |                           | 1.521                   |                        | Y ●● Y                                        |          | 19.695                       |                           | 19.695                  |                        | Y ●●      |                   |  |                        |
|                 | <i>hypothetical protein [Methylobacillus flagellatus KT]637938818 YP_546010</i>                                           |                              |                           |                         |                        |                                               |          |                              |                           |                         |                        |           |                   |  |                        |
| <b>MFLA1903</b> |                                                                                                                           | 0.000                        | 0.000                     |                         |                        | ●●                                            |          | 0.000                        | 0.000                     |                         |                        | ●●        |                   |  |                        |
|                 | <i>hypothetical protein [Methylobacillus flagellatus KT]637938819 YP_546011</i>                                           |                              |                           |                         |                        |                                               |          |                              |                           |                         |                        |           |                   |  |                        |
| <b>MFLA1904</b> | 2.78 E-3                                                                                                                  | 4.552                        | 5.431                     | 6.058                   | -0.877                 | G ●● Y                                        | 2.76 E-2 | 23.532                       | 25.259                    | 25.640                  | -1.665                 | G ●●      |                   |  |                        |
|                 | <i>glycine cleavage T protein (aminomethyl transferase) [Methylobacillus flagellatus KT]637938820 YP_546012</i>           |                              |                           |                         |                        |                                               |          |                              |                           |                         |                        |           |                   |  |                        |

| ORF             | AM/OH <i>M. Flagellatus</i> Spectral Count                                                                                         |                              |                           |                         |                        |            | AM/OH <i>M. Flagellatus</i> Protein Intensity |                              |                           |                         |                        |           | Spectral Count         |  | Protein Intensity |  |
|-----------------|------------------------------------------------------------------------------------------------------------------------------------|------------------------------|---------------------------|-------------------------|------------------------|------------|-----------------------------------------------|------------------------------|---------------------------|-------------------------|------------------------|-----------|------------------------|--|-------------------|--|
|                 | q-value                                                                                                                            | log <sub>2</sub> Methylamine | log <sub>2</sub> Methanol | log <sub>2</sub> Sc Sum | log <sub>2</sub> Ratio | Regulation | q-value                                       | log <sub>2</sub> Methylamine | log <sub>2</sub> Methanol | log <sub>2</sub> PI Sum | log <sub>2</sub> Ratio | Consensus | Log <sub>2</sub> Ratio |  |                   |  |
| <b>MFLA1905</b> |                                                                                                                                    | 2.328                        |                           | 2.328                   |                        | Y ●● Y     |                                               | 18.339                       |                           | 18.339                  |                        | Y ●       |                        |  |                   |  |
|                 | <i>TonB-dependent receptor [Methylobacillus flagellatus KT]637938821 YP_546013</i>                                                 |                              |                           |                         |                        |            |                                               |                              |                           |                         |                        |           |                        |  |                   |  |
| <b>MFLA1906</b> |                                                                                                                                    | 0.000                        | 0.000                     |                         |                        | ●●         |                                               | 0.000                        |                           | 0.000                   |                        | ●         |                        |  |                   |  |
|                 | <i>hypothetical protein [Methylobacillus flagellatus KT]637938822 YP_546014</i>                                                    |                              |                           |                         |                        |            |                                               |                              |                           |                         |                        |           |                        |  |                   |  |
| <b>MFLA1907</b> | 2.761                                                                                                                              | 0.000                        |                           | 2.959                   | 1.571                  | Y ●● Y     | 1.33 E-1                                      | 20.834                       | 18.720                    | 21.134                  | 0.948                  | Y ●       |                        |  |                   |  |
|                 | <i>diguanylate cyclase (GGDEF domain) [Methylobacillus flagellatus KT]637938823 YP_546015</i>                                      |                              |                           |                         |                        |            |                                               |                              |                           |                         |                        |           |                        |  |                   |  |
| <b>MFLA1908</b> |                                                                                                                                    | 0.000                        | 0.000                     |                         |                        | ●●         |                                               | 0.000                        |                           | 0.000                   |                        | ●         |                        |  |                   |  |
|                 | <i>Septum formation initiator [Methylobacillus flagellatus KT]637938824 YP_546016</i>                                              |                              |                           |                         |                        |            |                                               |                              |                           |                         |                        |           |                        |  |                   |  |
| <b>MFLA1909</b> | 0                                                                                                                                  | 8.704                        | 9.712                     | 10.294                  | -1.035                 | G ●● Y     | 1.13 E-2                                      | 27.333                       | 28.404                    | 28.966                  | -1.105                 | G ●       |                        |  |                   |  |
|                 | <i>Phosphopyruvate hydratase [Methylobacillus flagellatus KT]637938825 YP_546017</i>                                               |                              |                           |                         |                        |            |                                               |                              |                           |                         |                        |           |                        |  |                   |  |
| <b>MFLA1910</b> | 9.45 E-6                                                                                                                           | 5.353                        | 4.087                     | 5.854                   | 1.204                  | R ●● Y     | 2.15 E-1                                      | 23.951                       | 24.072                    | 25.013                  | -0.066                 | Y ●       |                        |  |                   |  |
|                 | <i>2-dehydro-3-deoxyphosphooctonate aldolase [Methylobacillus flagellatus KT]637938826 YP_546018</i>                               |                              |                           |                         |                        |            |                                               |                              |                           |                         |                        |           |                        |  |                   |  |
| <b>MFLA1911</b> | 1.02 E-2                                                                                                                           | 7.202                        | 6.880                     | 8.050                   | 0.331                  | Y ●● G     | 4.58 E-3                                      | 26.193                       | 26.781                    | 27.517                  | -0.589                 | Y ●       |                        |  |                   |  |
|                 | <i>CTP synthase [Methylobacillus flagellatus KT]637938827 YP_546019</i>                                                            |                              |                           |                         |                        |            |                                               |                              |                           |                         |                        |           |                        |  |                   |  |
| <b>MFLA1912</b> | 1.521                                                                                                                              | 1.184                        | 2.362                     | 1.347                   | 1.347                  | Y ●● Y     | 2.27 E-1                                      | 20.373                       | 21.520                    | 22.058                  | -0.069                 | Y ●       |                        |  |                   |  |
|                 | <i>YjeF-related protein-like protein [Methylobacillus flagellatus KT]637938828 YP_546020</i>                                       |                              |                           |                         |                        |            |                                               |                              |                           |                         |                        |           |                        |  |                   |  |
| <b>MFLA1913</b> | 2.106                                                                                                                              | 2.788                        | 3.487                     | 0.479                   | 0.479                  | Y ●● Y     | 1.52 E-1                                      | 20.477                       | 21.737                    | 22.240                  | -0.236                 | Y ●       |                        |  |                   |  |
|                 | <i>Initiation factor 2B alpha/beta/delta [Methylobacillus flagellatus KT]637938829 YP_546021</i>                                   |                              |                           |                         |                        |            |                                               |                              |                           |                         |                        |           |                        |  |                   |  |
| <b>MFLA1914</b> |                                                                                                                                    | 0.000                        | 0.000                     |                         |                        | ●●         |                                               | 0.000                        |                           | 0.000                   |                        | ●         |                        |  |                   |  |
|                 | <i>TatD-related deoxyribonuclease [Methylobacillus flagellatus KT]637938830 YP_546022</i>                                          |                              |                           |                         |                        |            |                                               |                              |                           |                         |                        |           |                        |  |                   |  |
| <b>MFLA1915</b> | 3.937                                                                                                                              | 4.079                        | 5.010                     | -0.214                  | -0.214                 | Y ●● Y     | 4.29 E-2                                      | 21.725                       | 22.607                    | 23.233                  | -1.016                 | Y ●       |                        |  |                   |  |
|                 | <i>riboflavin biosynthesis protein RibD [Methylobacillus flagellatus KT]637938831 YP_546023</i>                                    |                              |                           |                         |                        |            |                                               |                              |                           |                         |                        |           |                        |  |                   |  |
| <b>MFLA1916</b> | 3.571                                                                                                                              | 4.398                        | 5.043                     | -0.811                  | -0.811                 | Y ●● Y     | 1.23 E-1                                      | 22.498                       | 22.984                    | 23.762                  | -0.563                 | Y ●       |                        |  |                   |  |
|                 | <i>Protein of unknown function DUF193 [Methylobacillus flagellatus KT]637938832 YP_546024</i>                                      |                              |                           |                         |                        |            |                                               |                              |                           |                         |                        |           |                        |  |                   |  |
| <b>MFLA1917</b> | 8.029                                                                                                                              | 8.627                        | 9.359                     | -0.598                  | -0.598                 | Y ●● Y     | 1.11 E-2                                      | 27.577                       | 28.185                    | 28.913                  | -0.608                 | Y ●       |                        |  |                   |  |
|                 | <i>Glycine hydroxymethyltransferase [Methylobacillus flagellatus KT]637938833 YP_546025</i>                                        |                              |                           |                         |                        |            |                                               |                              |                           |                         |                        |           |                        |  |                   |  |
| <b>MFLA1918</b> | 4.552                                                                                                                              | 5.040                        | 5.816                     | -0.494                  | -0.494                 | Y ●● Y     | 1.93 E-1                                      | 23.854                       | 23.553                    | 24.712                  | 0.175                  | Y ●       |                        |  |                   |  |
|                 | <i>" hydro-lyases, Fe-S type, tartrate/fumarate subfamily, alpha region [Methylobacillus flagellatus KT]637938834 YP_546026 ""</i> |                              |                           |                         |                        |            |                                               |                              |                           |                         |                        |           |                        |  |                   |  |
| <b>MFLA1919</b> | 0                                                                                                                                  | 7.337                        | 8.510                     | 9.040                   | -1.451                 | G ●● G     | 8.35 E-3                                      | 25.040                       | 26.604                    | 27.025                  | -1.595                 | G ●       |                        |  |                   |  |
|                 | <i>NADH:flavin oxidoreductase/NADH oxidase [Methylobacillus flagellatus KT]637938835 YP_546027</i>                                 |                              |                           |                         |                        |            |                                               |                              |                           |                         |                        |           |                        |  |                   |  |
| <b>MFLA1920</b> |                                                                                                                                    | 4.184                        | 4.184                     |                         |                        | Y ●● Y     |                                               |                              | 22.804                    | 22.804                  |                        | Y ●       |                        |  |                   |  |
|                 | <i>protein of unknown function DUF528 [Methylobacillus flagellatus KT]637938836 YP_546028</i>                                      |                              |                           |                         |                        |            |                                               |                              |                           |                         |                        |           |                        |  |                   |  |
| <b>MFLA1921</b> | 3.57 E-9                                                                                                                           | 6.828                        | 7.582                     | 8.254                   | -0.770                 | G ●● Y     | 1.23 E-2                                      | 26.996                       | 28.001                    | 28.584                  | -1.014                 | G ●       |                        |  |                   |  |
|                 | <i>Phosphoglucomutase [Methylobacillus flagellatus KT]637938837 YP_546029</i>                                                      |                              |                           |                         |                        |            |                                               |                              |                           |                         |                        |           |                        |  |                   |  |
| <b>MFLA1922</b> |                                                                                                                                    | 1.322                        | 1.322                     |                         |                        | Y ●● Y     |                                               |                              | 20.788                    | 20.788                  |                        | Y ●       |                        |  |                   |  |
|                 | <i>" peptidase A2A, retrovirus, catalytic [Methylobacillus flagellatus KT]637938838 YP_546030 ""</i>                               |                              |                           |                         |                        |            |                                               |                              |                           |                         |                        |           |                        |  |                   |  |
| <b>MFLA1923</b> |                                                                                                                                    | 0.000                        | 0.000                     |                         |                        | ●●         |                                               | 0.000                        |                           | 0.000                   |                        | ●         |                        |  |                   |  |
|                 | <i>hypothetical protein [Methylobacillus flagellatus KT]637938839 YP_546031</i>                                                    |                              |                           |                         |                        |            |                                               |                              |                           |                         |                        |           |                        |  |                   |  |
| <b>MFLA1924</b> |                                                                                                                                    | 0.000                        | 0.000                     |                         |                        | ●●         |                                               | 0.000                        |                           | 0.000                   |                        | ●         |                        |  |                   |  |
|                 | <i>" acetyltransferase, GNAT family [Methylobacillus flagellatus KT]637938840 YP_546032 ""</i>                                     |                              |                           |                         |                        |            |                                               |                              |                           |                         |                        |           |                        |  |                   |  |
| <b>MFLA1925</b> | 1.39 E-1                                                                                                                           | 5.926                        | 5.940                     | 6.933                   | -0.025                 | Y ●● Y     | 2.46 E-2                                      | 26.126                       | 26.497                    | 27.323                  | -0.378                 | Y ●       |                        |  |                   |  |
|                 | <i>phosphoglucomutase/phosphomannomutase alpha/beta/alpha domain I [Methylobacillus flagellatus KT]637938841 YP_546033</i>         |                              |                           |                         |                        |            |                                               |                              |                           |                         |                        |           |                        |  |                   |  |
| <b>MFLA1926</b> |                                                                                                                                    | 3.173                        | 4.479                     | 4.969                   | -1.408                 | Y ●● Y     | 1.38 E-2                                      | 23.112                       | 24.699                    | 25.113                  | -1.616                 | Y ●       |                        |  |                   |  |
|                 | <i>cyclic nucleotide-binding domain (cNMP-BD) protein [Methylobacillus flagellatus KT]637938843 YP_546034</i>                      |                              |                           |                         |                        |            |                                               |                              |                           |                         |                        |           |                        |  |                   |  |



AM/OH *M. Flagellatus* Spectral Count

AM/OH *M. Flagellatus* Protein Intensity

| ORF             | Spectral Count                                                                                                                      |                              |                           |                         |                        | Protein Intensity |          |                              |                           |                         | Consensus | Log <sub>2</sub> Ratio |                        |
|-----------------|-------------------------------------------------------------------------------------------------------------------------------------|------------------------------|---------------------------|-------------------------|------------------------|-------------------|----------|------------------------------|---------------------------|-------------------------|-----------|------------------------|------------------------|
|                 | q-value                                                                                                                             | log <sub>2</sub> Methylamine | log <sub>2</sub> Methanol | log <sub>2</sub> Sc Sum | log <sub>2</sub> Ratio | Regulation        | q-value  | log <sub>2</sub> Methylamine | log <sub>2</sub> Methanol | log <sub>2</sub> PI Sum |           |                        | log <sub>2</sub> Ratio |
| <b>MFLA1927</b> |                                                                                                                                     | 3.552                        | 3.568                     | 4.560                   | -0.019                 | Y ●●● Y           | 1.1 E-2  | 22.361                       | 22.733                    | 23.559                  | -0.371    | Y ●●                   |                        |
|                 | <i>" transcriptional regulator, LuxR family [Methylobacillus flagellatus KT]637938844 YP_546035 ""</i>                              |                              |                           |                         |                        |                   |          |                              |                           |                         |           |                        |                        |
| <b>MFLA1928</b> | 4.33 E-3                                                                                                                            | 4.922                        | 5.654                     | 6.334                   | -0.712                 | G ●●● Y           | 1.15 E-1 | 24.707                       | 25.294                    | 26.030                  | -0.644    | G ●●                   |                        |
|                 | <i>" Chemotaxis phosphatase, CheZ [Methylobacillus flagellatus KT]637938845 YP_546036 ""</i>                                        |                              |                           |                         |                        |                   |          |                              |                           |                         |           |                        |                        |
| <b>MFLA1929</b> | 5.88 E-2                                                                                                                            | 6.443                        | 6.568                     | 7.507                   | -0.148                 | Y ●●● Y           | 7.12 E-3 | 26.363                       | 26.060                    | 27.220                  | 0.303     | Y ●●                   |                        |
|                 | <i>response regulator receiver domain protein (CheY-like) [Methylobacillus flagellatus KT]637938846 YP_546037</i>                   |                              |                           |                         |                        |                   |          |                              |                           |                         |           |                        |                        |
| <b>MFLA1930</b> |                                                                                                                                     | 6.015                        | 6.190                     | 7.105                   | -0.352                 | Y ●●● Y           | 1.28 E-1 | 24.706                       | 25.033                    | 25.879                  | -0.399    | Y ●●                   |                        |
|                 | <i>response regulator receiver (CheY-like) modulated CheB methyltransferase [Methylobacillus flagellatus KT]637938847 YP_546038</i> |                              |                           |                         |                        |                   |          |                              |                           |                         |           |                        |                        |
| <b>MFLA1931</b> |                                                                                                                                     | 1.322                        | 1.322                     |                         |                        | Y ●●● Y           |          |                              | 19.550                    | 19.550                  |           | Y ●●                   |                        |
|                 | <i>" CheD, stimulates methylation of MCP proteins [Methylobacillus flagellatus KT]637938848 YP_546039 ""</i>                        |                              |                           |                         |                        |                   |          |                              |                           |                         |           |                        |                        |
| <b>MFLA1932</b> |                                                                                                                                     | 1.521                        | 0.000                     | 1.952                   | 1.521                  | Y ●●● Y           |          | 18.477                       | 20.543                    | 20.852                  | -2.066    | Y ●●                   |                        |
|                 | <i>" MCP methyltransferase, CheR-type [Methylobacillus flagellatus KT]637938849 YP_546040 ""</i>                                    |                              |                           |                         |                        |                   |          |                              |                           |                         |           |                        |                        |
| <b>MFLA1933</b> |                                                                                                                                     | 7.154                        | 6.764                     | 7.972                   | 0.360                  | Y ●●● Y           | 1.67 E-1 | 26.534                       | 26.134                    | 27.347                  | 0.296     | Y ●●                   |                        |
|                 | <i>methyl-accepting chemotaxis sensory transducer with Pas/Pac sensor [Methylobacillus flagellatus KT]637938850 YP_546041</i>       |                              |                           |                         |                        |                   |          |                              |                           |                         |           |                        |                        |
| <b>MFLA1934</b> | 1.09 E-11                                                                                                                           | 7.394                        | 6.459                     | 8.001                   | 0.965                  | R ●●● Y           | 1.08 E-2 | 27.681                       | 26.023                    | 28.078                  | 1.670     | R ●●                   |                        |
|                 | <i>methyl-accepting chemotaxis sensory transducer [Methylobacillus flagellatus KT]637938851 YP_546042</i>                           |                              |                           |                         |                        |                   |          |                              |                           |                         |           |                        |                        |
| <b>MFLA1935</b> |                                                                                                                                     | 2.328                        | 4.388                     | 4.698                   | -1.054                 | Y ●●● Y           | 2.7 E-1  | 23.374                       | 24.393                    | 24.972                  | 0.018     | Y ●●                   |                        |
|                 | <i>CheW protein [Methylobacillus flagellatus KT]637938852 YP_546043</i>                                                             |                              |                           |                         |                        |                   |          |                              |                           |                         |           |                        |                        |
| <b>MFLA1936</b> | 7.26 E-5                                                                                                                            | 6.623                        | 6.039                     | 7.360                   | 0.663                  | R ●●● Y           | 9.5 E-2  | 26.589                       | 25.075                    | 27.022                  | 1.336     | R ●●                   |                        |
|                 | <i>CheA signal transduction histidine kinases [Methylobacillus flagellatus KT]637938853 YP_546044</i>                               |                              |                           |                         |                        |                   |          |                              |                           |                         |           |                        |                        |
| <b>MFLA1937</b> |                                                                                                                                     | 4.581                        | 4.884                     | 5.741                   | -0.214                 | Y ●●● Y           | 1.5 E-1  | 24.150                       | 24.571                    | 25.376                  | -0.375    | Y ●●                   |                        |
|                 | <i>response regulator receiver domain protein (CheY-like) [Methylobacillus flagellatus KT]637938854 YP_546045</i>                   |                              |                           |                         |                        |                   |          |                              |                           |                         |           |                        |                        |
| <b>MFLA1938</b> |                                                                                                                                     | 2.398                        | 2.627                     | 3.517                   | 0.772                  | Y ●●● Y           | 1.57 E-2 | 20.526                       | 22.751                    | 23.030                  | -1.225    | Y ●●                   |                        |
|                 | <i>hypothetical protein [Methylobacillus flagellatus KT]637938855 YP_546046</i>                                                     |                              |                           |                         |                        |                   |          |                              |                           |                         |           |                        |                        |
| <b>MFLA1939</b> |                                                                                                                                     | 4.087                        | 2.295                     | 4.453                   | 1.786                  | Y ●●● Y           | 2.19 E-1 | 22.392                       | 22.315                    | 23.354                  | 0.064     | Y ●●                   |                        |
|                 | <i>OmpA/MotB [Methylobacillus flagellatus KT]637938856 YP_546047</i>                                                                |                              |                           |                         |                        |                   |          |                              |                           |                         |           |                        |                        |
| <b>MFLA1940</b> |                                                                                                                                     | 3.408                        | 3.353                     | 4.381                   | -0.015                 | Y ●●● Y           | 1.08 E-1 | 21.918                       | 21.172                    | 22.593                  | 0.552     | Y ●●                   |                        |
|                 | <i>putative chemotaxis transmembrane protein MotA [Methylobacillus flagellatus KT]637938857 YP_546048</i>                           |                              |                           |                         |                        |                   |          |                              |                           |                         |           |                        |                        |
| <b>MFLA1941</b> |                                                                                                                                     | 0.000                        | 0.000                     |                         |                        | ●●●               |          | 0.000                        | 0.000                     |                         |           | ●●                     |                        |
|                 | <i>hypothetical protein [Methylobacillus flagellatus KT]637938858 YP_546049</i>                                                     |                              |                           |                         |                        |                   |          |                              |                           |                         |           |                        |                        |
| <b>MFLA1942</b> |                                                                                                                                     | 0.000                        | 0.000                     |                         |                        | ●●●               |          | 0.000                        | 0.000                     |                         |           | ●●                     |                        |
|                 | <i>flagellar transcriptional activator FlhC [Methylobacillus flagellatus KT]637938859 YP_546050</i>                                 |                              |                           |                         |                        |                   |          |                              |                           |                         |           |                        |                        |
| <b>MFLA1943</b> |                                                                                                                                     | 0.000                        | 0.000                     |                         |                        | ●●●               |          | 0.000                        | 0.000                     |                         |           | ●●                     |                        |
|                 | <i>flagellar transcriptional activator [Methylobacillus flagellatus KT]637938860 YP_546051</i>                                      |                              |                           |                         |                        |                   |          |                              |                           |                         |           |                        |                        |
| <b>MFLA1944</b> |                                                                                                                                     | 0.000                        | 0.000                     |                         |                        | ●●●               |          | 0.000                        | 0.000                     |                         |           | ●●                     |                        |
|                 | <i>flagellar biosynthetic protein FlhB [Methylobacillus flagellatus KT]637938861 YP_546052</i>                                      |                              |                           |                         |                        |                   |          |                              |                           |                         |           |                        |                        |
| <b>MFLA1945</b> |                                                                                                                                     | 0.000                        | 0.000                     |                         |                        | ●●●               |          | 0.000                        | 0.000                     |                         |           | ●●                     |                        |
|                 | <i>flagellar biosynthesis protein FlhA [Methylobacillus flagellatus KT]637938862 YP_546053</i>                                      |                              |                           |                         |                        |                   |          |                              |                           |                         |           |                        |                        |
| <b>MFLA1946</b> |                                                                                                                                     | 0.000                        | 0.000                     |                         |                        | ●●●               |          | 0.000                        | 0.000                     |                         |           | ●●                     |                        |
|                 | <i>" GTP-binding signal recognition particle SRP54, G-domain [Methylobacillus flagellatus KT]637938863 YP_546054 ""</i>             |                              |                           |                         |                        |                   |          |                              |                           |                         |           |                        |                        |
| <b>MFLA1947</b> |                                                                                                                                     | 0.000                        | 0.000                     |                         |                        | ●●●               |          | 0.000                        | 0.000                     |                         |           | ●●                     |                        |
|                 | <i>hypothetical protein [Methylobacillus flagellatus KT]637938864 YP_546055</i>                                                     |                              |                           |                         |                        |                   |          |                              |                           |                         |           |                        |                        |
| <b>MFLA1948</b> |                                                                                                                                     | 4.107                        | 5.001                     | 5.622                   | -0.898                 | Y ●●● Y           | 7.33 E-2 | 23.351                       | 24.189                    | 24.830                  | -1.149    | Y ●●                   |                        |
|                 | <i>sigma 28 (Flagella/Sporulation) [Methylobacillus flagellatus KT]637938865 YP_546056</i>                                          |                              |                           |                         |                        |                   |          |                              |                           |                         |           |                        |                        |

| ORF             | AM/OH <i>M. Flagellatus</i> Spectral Count                                                                       |                              |                           |                         |                        |            | AM/OH <i>M. Flagellatus</i> Protein Intensity |                              |                           |                         |                        |     | Consensus | Log <sub>2</sub> Ratio |
|-----------------|------------------------------------------------------------------------------------------------------------------|------------------------------|---------------------------|-------------------------|------------------------|------------|-----------------------------------------------|------------------------------|---------------------------|-------------------------|------------------------|-----|-----------|------------------------|
|                 | q-value                                                                                                          | log <sub>2</sub> Methylamine | log <sub>2</sub> Methanol | log <sub>2</sub> Sc Sum | log <sub>2</sub> Ratio | Regulation | q-value                                       | log <sub>2</sub> Methylamine | log <sub>2</sub> Methanol | log <sub>2</sub> PI Sum | log <sub>2</sub> Ratio |     |           |                        |
| <b>MFLA1949</b> |                                                                                                                  | 1.813                        |                           | 1.813                   |                        | Y ●● Y     |                                               | 18.936                       |                           | 18.936                  |                        | Y ● |           |                        |
|                 | <i>MotA/ToIQ/ExbB proton channel [Methylobacillus flagellatus KT]637938866 YP_546057</i>                         |                              |                           |                         |                        |            |                                               |                              |                           |                         |                        |     |           |                        |
| <b>MFLA1950</b> |                                                                                                                  |                              | 0.346                     | 0.346                   |                        | Y ●● Y     |                                               |                              |                           | 19.211                  | 19.211                 |     | Y ●       |                        |
|                 | <i>OmpA/MotB [Methylobacillus flagellatus KT]637938867 YP_546058</i>                                             |                              |                           |                         |                        |            |                                               |                              |                           |                         |                        |     |           |                        |
| <b>MFLA1951</b> |                                                                                                                  | 3.364                        | 3.000                     | 4.193                   | -0.637                 | Y ●● Y     | 1.4 E-1                                       | 23.189                       | 20.330                    | 23.375                  | 1.441                  | Y ● |           |                        |
|                 | <i>FlgN [Methylobacillus flagellatus KT]637938868 YP_546059</i>                                                  |                              |                           |                         |                        |            |                                               |                              |                           |                         |                        |     |           |                        |
| <b>MFLA1952</b> | 1.56 E-4                                                                                                         | 4.784                        | 5.746                     | 6.343                   | -1.194                 | G ●● Y     | 3.84 E-2                                      | 24.434                       | 25.872                    | 26.325                  | -2.498                 | G ● |           |                        |
|                 | <i>" anti-sigma-28 factor, FlgM [Methylobacillus flagellatus KT]637938869 YP_546060 ""</i>                       |                              |                           |                         |                        |            |                                               |                              |                           |                         |                        |     |           |                        |
| <b>MFLA1953</b> |                                                                                                                  | 0.000                        | 0.000                     |                         |                        | ●●         |                                               | 0.000                        | 0.000                     |                         |                        | ●   |           |                        |
|                 | <i>Flagellar protein FlgA [Methylobacillus flagellatus KT]637938870 YP_546061</i>                                |                              |                           |                         |                        |            |                                               |                              |                           |                         |                        |     |           |                        |
| <b>MFLA1954</b> |                                                                                                                  | 1.521                        | 2.769                     | 3.275                   | -0.238                 | Y ●● Y     | 1.06 E-1                                      | 20.158                       | 22.197                    | 22.511                  | -0.978                 | Y ● |           |                        |
|                 | <i>flagellar basal-body rod protein FlgB [Methylobacillus flagellatus KT]637938871 YP_546062</i>                 |                              |                           |                         |                        |            |                                               |                              |                           |                         |                        |     |           |                        |
| <b>MFLA1955</b> |                                                                                                                  |                              | 2.949                     | 2.949                   |                        | Y ●● Y     |                                               |                              |                           | 22.505                  | 22.505                 |     | Y ●       |                        |
|                 | <i>flagellar basal-body rod protein FlgC [Methylobacillus flagellatus KT]637938872 YP_546063</i>                 |                              |                           |                         |                        |            |                                               |                              |                           |                         |                        |     |           |                        |
| <b>MFLA1956</b> |                                                                                                                  | 2.521                        | 2.949                     | 3.751                   | 0.762                  | Y ●● Y     | 1.02 E-1                                      | 21.901                       | 22.560                    | 23.268                  | 0.354                  | Y ● |           |                        |
|                 | <i>flagellar hook capping protein [Methylobacillus flagellatus KT]637938873 YP_546064</i>                        |                              |                           |                         |                        |            |                                               |                              |                           |                         |                        |     |           |                        |
| <b>MFLA1957</b> | 7.09 E-2                                                                                                         | 5.874                        | 5.561                     | 6.726                   | 0.318                  | Y ●● Y     | 2.32 E-1                                      | 24.738                       | 24.693                    | 25.716                  | 0.030                  | Y ● |           |                        |
|                 | <i>protein of unknown function DUF1078-like protein [Methylobacillus flagellatus KT]637938874 YP_546065</i>      |                              |                           |                         |                        |            |                                               |                              |                           |                         |                        |     |           |                        |
| <b>MFLA1958</b> |                                                                                                                  | 0.000                        | 0.000                     |                         |                        | ●●         |                                               | 0.000                        | 0.000                     |                         |                        | ●   |           |                        |
|                 | <i>Flagellar basal-body rod FlgF [Methylobacillus flagellatus KT]637938875 YP_546066</i>                         |                              |                           |                         |                        |            |                                               |                              |                           |                         |                        |     |           |                        |
| <b>MFLA1959</b> |                                                                                                                  | 4.451                        | 4.823                     | 5.649                   | -0.653                 | Y ●● Y     | 1.43 E-1                                      | 22.094                       | 22.692                    | 23.424                  | -0.441                 | Y ● |           |                        |
|                 | <i>Flagellar basal-body rod FlgG [Methylobacillus flagellatus KT]637938876 YP_546067</i>                         |                              |                           |                         |                        |            |                                               |                              |                           |                         |                        |     |           |                        |
| <b>MFLA1960</b> |                                                                                                                  | 0.000                        | 0.000                     |                         |                        | ●●         |                                               | 0.000                        | 0.000                     |                         |                        | ●   |           |                        |
|                 | <i>flagellar L-ring protein [Methylobacillus flagellatus KT]637938877 YP_546068</i>                              |                              |                           |                         |                        |            |                                               |                              |                           |                         |                        |     |           |                        |
| <b>MFLA1961</b> |                                                                                                                  |                              | 1.668                     | 1.668                   |                        | Y ●● Y     |                                               |                              |                           | 21.210                  | 21.210                 |     | Y ●       |                        |
|                 | <i>flagellar P-ring protein [Methylobacillus flagellatus KT]637938878 YP_546069</i>                              |                              |                           |                         |                        |            |                                               |                              |                           |                         |                        |     |           |                        |
| <b>MFLA1962</b> |                                                                                                                  |                              | 0.931                     | 0.931                   |                        | Y ●● Y     |                                               |                              |                           | 19.976                  | 19.976                 |     | Y ●       |                        |
|                 | <i>Mannosyl-glycoprotein endo-beta-N-acetylglucosamidase [Methylobacillus flagellatus KT]637938879 YP_546070</i> |                              |                           |                         |                        |            |                                               |                              |                           |                         |                        |     |           |                        |
| <b>MFLA1963</b> |                                                                                                                  | 3.621                        | 4.147                     | 4.908                   | 0.626                  | Y ●● Y     | 1.75 E-1                                      | 21.810                       | 23.607                    | 23.972                  | -0.460                 | Y ● |           |                        |
|                 | <i>Flagellar hook-associated protein [Methylobacillus flagellatus KT]637938880 YP_546071</i>                     |                              |                           |                         |                        |            |                                               |                              |                           |                         |                        |     |           |                        |
| <b>MFLA1964</b> |                                                                                                                  | 3.621                        | 4.893                     | 5.393                   | -0.257                 | Y ●● Y     | 2.87 E-2                                      | 20.367                       | 23.469                    | 23.628                  | -2.100                 | Y ● |           |                        |
|                 | <i>flagellin-like protein [Methylobacillus flagellatus KT]637938881 YP_546072</i>                                |                              |                           |                         |                        |            |                                               |                              |                           |                         |                        |     |           |                        |
| <b>MFLA1965</b> |                                                                                                                  | 3.967                        | 4.790                     | 5.437                   | -0.778                 | Y ●● Y     | 4.25 E-2                                      | 22.753                       | 23.913                    | 24.446                  | -1.130                 | Y ● |           |                        |
|                 | <i>diguanylate phosphodiesterase (EAL domain) [Methylobacillus flagellatus KT]637938882 YP_546073</i>            |                              |                           |                         |                        |            |                                               |                              |                           |                         |                        |     |           |                        |
| <b>MFLA1966</b> |                                                                                                                  | 0.000                        | 0.000                     |                         |                        | ●●         |                                               | 0.000                        | 0.000                     |                         |                        | ●   |           |                        |
|                 | <i>flagellar biosynthetic protein FliR [Methylobacillus flagellatus KT]637938883 YP_546074</i>                   |                              |                           |                         |                        |            |                                               |                              |                           |                         |                        |     |           |                        |
| <b>MFLA1967</b> |                                                                                                                  | 0.000                        | 0.000                     |                         |                        | ●●         |                                               | 0.000                        | 0.000                     |                         |                        | ●   |           |                        |
|                 | <i>flagellar biosynthetic protein FliQ [Methylobacillus flagellatus KT]637938884 YP_546075</i>                   |                              |                           |                         |                        |            |                                               |                              |                           |                         |                        |     |           |                        |
| <b>MFLA1968</b> |                                                                                                                  | 0.000                        | 0.000                     |                         |                        | ●●         |                                               | 0.000                        | 0.000                     |                         |                        | ●   |           |                        |
|                 | <i>flagellar biosynthetic protein FliP [Methylobacillus flagellatus KT]637938885 YP_546076</i>                   |                              |                           |                         |                        |            |                                               |                              |                           |                         |                        |     |           |                        |
| <b>MFLA1969</b> |                                                                                                                  | 0.000                        | 0.000                     |                         |                        | ●●         |                                               | 0.000                        | 0.000                     |                         |                        | ●   |           |                        |
|                 | <i>" flagellar biosynthesis protein, FliO [Methylobacillus flagellatus KT]637938886 YP_546077 ""</i>             |                              |                           |                         |                        |            |                                               |                              |                           |                         |                        |     |           |                        |
| <b>MFLA1970</b> |                                                                                                                  |                              | 1.000                     | 1.000                   |                        | Y ●● Y     |                                               |                              |                           | 22.695                  | 22.695                 |     | Y ●       |                        |
|                 | <i>Flagellar motor switch FliN [Methylobacillus flagellatus KT]637938887 YP_546078</i>                           |                              |                           |                         |                        |            |                                               |                              |                           |                         |                        |     |           |                        |



| ORF             | AM/OH <i>M. Flagellatus</i> Spectral Count                                                                           |                              |                           |                         |                        | AM/OH <i>M. Flagellatus</i> Protein Intensity |          |                              |                           |                         | Spectral Count         |           | Protein Intensity |  | Log <sub>2</sub> Ratio |
|-----------------|----------------------------------------------------------------------------------------------------------------------|------------------------------|---------------------------|-------------------------|------------------------|-----------------------------------------------|----------|------------------------------|---------------------------|-------------------------|------------------------|-----------|-------------------|--|------------------------|
|                 | q-value                                                                                                              | log <sub>2</sub> Methylamine | log <sub>2</sub> Methanol | log <sub>2</sub> Sc Sum | log <sub>2</sub> Ratio | Regulation                                    | q-value  | log <sub>2</sub> Methylamine | log <sub>2</sub> Methanol | log <sub>2</sub> PI Sum | log <sub>2</sub> Ratio | Consensus |                   |  |                        |
| <b>MFLA1971</b> |                                                                                                                      | 3.147                        | 2.529                     | 3.871                   | 0.862                  | Y ●● Y                                        | 1.06 E-1 | 21.955                       | 22.483                    | 23.243                  | -0.720                 | Y ●       |                   |  |                        |
|                 | <i>flagellar motor switch protein FlIM [Methylobacillus flagellatus KT]637938888 YP_546079</i>                       |                              |                           |                         |                        |                                               |          |                              |                           |                         |                        |           |                   |  |                        |
| <b>MFLA1972</b> |                                                                                                                      | 3.691                        | 2.941                     | 4.364                   | 1.771                  | Y ●● Y                                        | 1.54 E-1 | 21.528                       | 22.971                    | 23.423                  | -0.378                 | Y ●       |                   |  |                        |
|                 | <i>flagellar basal body-associated protein FliL [Methylobacillus flagellatus KT]637938889 YP_546080</i>              |                              |                           |                         |                        |                                               |          |                              |                           |                         |                        |           |                   |  |                        |
| <b>MFLA1973</b> |                                                                                                                      |                              | 0.585                     | 0.585                   |                        | Y ●● Y                                        |          |                              | 21.008                    | 21.008                  |                        | Y ●       |                   |  |                        |
|                 | <i>flagellar hook-length control protein [Methylobacillus flagellatus KT]637938890 YP_546081</i>                     |                              |                           |                         |                        |                                               |          |                              |                           |                         |                        |           |                   |  |                        |
| <b>MFLA1974</b> |                                                                                                                      | 0.000                        | 0.000                     |                         |                        | ●●                                            |          | 0.000                        | 0.000                     |                         |                        | ●         |                   |  |                        |
|                 | <i>Flagellar export FliJ [Methylobacillus flagellatus KT]637938891 YP_546082</i>                                     |                              |                           |                         |                        |                                               |          |                              |                           |                         |                        |           |                   |  |                        |
| <b>MFLA1975</b> |                                                                                                                      | 0.521                        | 1.322                     | 1.976                   | -0.801                 | Y ●● Y                                        |          | 21.897                       | 22.140                    | 23.024                  | -0.243                 | Y ●       |                   |  |                        |
|                 | <i>ATPase FliI/YscN [Methylobacillus flagellatus KT]637938892 YP_546083</i>                                          |                              |                           |                         |                        |                                               |          |                              |                           |                         |                        |           |                   |  |                        |
| <b>MFLA1976</b> |                                                                                                                      | 0.000                        | 0.000                     |                         |                        | ●●                                            |          | 0.000                        | 0.000                     |                         |                        | ●         |                   |  |                        |
|                 | <i>flagellar assembly protein FliH [Methylobacillus flagellatus KT]637938893 YP_546084</i>                           |                              |                           |                         |                        |                                               |          |                              |                           |                         |                        |           |                   |  |                        |
| <b>MFLA1977</b> |                                                                                                                      | 4.424                        | 4.630                     | 5.531                   | -0.125                 | Y ●● Y                                        | 1.79 E-1 | 21.937                       | 22.209                    | 23.079                  | -0.167                 | Y ●       |                   |  |                        |
|                 | <i>flagellar motor switch protein FliG [Methylobacillus flagellatus KT]637938894 YP_546085</i>                       |                              |                           |                         |                        |                                               |          |                              |                           |                         |                        |           |                   |  |                        |
| <b>MFLA1978</b> |                                                                                                                      | 3.591                        | 2.505                     | 4.148                   | 1.076                  | Y ●● Y                                        | 9.02 E-2 | 22.152                       | 21.451                    | 22.843                  | 0.741                  | Y ●       |                   |  |                        |
|                 | <i>flagellar M-ring protein FliF [Methylobacillus flagellatus KT]637938895 YP_546086</i>                             |                              |                           |                         |                        |                                               |          |                              |                           |                         |                        |           |                   |  |                        |
| <b>MFLA1979</b> |                                                                                                                      | 3.173                        | 2.516                     | 3.882                   | -0.446                 | Y ●● Y                                        | 2.42 E-2 | 20.687                       | 20.797                    | 21.743                  | -1.112                 | Y ●       |                   |  |                        |
|                 | <i>flagellar hook-basal body complex protein (FliE) [Methylobacillus flagellatus KT]637938896 YP_546087</i>          |                              |                           |                         |                        |                                               |          |                              |                           |                         |                        |           |                   |  |                        |
| <b>MFLA1980</b> |                                                                                                                      | 0.000                        | 0.000                     |                         |                        | ●●                                            |          | 0.000                        | 0.000                     |                         |                        | ●         |                   |  |                        |
|                 | <i>putative flagellar biosynthetic protein [Methylobacillus flagellatus KT]637938897 YP_546088</i>                   |                              |                           |                         |                        |                                               |          |                              |                           |                         |                        |           |                   |  |                        |
| <b>MFLA1981</b> |                                                                                                                      | 3.532                        | 3.184                     | 4.368                   | 0.316                  | Y ●● Y                                        | 1.01 E-1 | 20.605                       | 20.104                    | 21.376                  | 0.648                  | Y ●       |                   |  |                        |
|                 | <i>hypothetical protein [Methylobacillus flagellatus KT]637938898 YP_546089</i>                                      |                              |                           |                         |                        |                                               |          |                              |                           |                         |                        |           |                   |  |                        |
| <b>MFLA1982</b> |                                                                                                                      | 0.000                        | 0.000                     |                         |                        | ●●                                            |          | 0.000                        | 0.000                     |                         |                        | ●         |                   |  |                        |
|                 | <i>flagellar protein FliT [Methylobacillus flagellatus KT]637938899 YP_546090</i>                                    |                              |                           |                         |                        |                                               |          |                              |                           |                         |                        |           |                   |  |                        |
| <b>MFLA1983</b> |                                                                                                                      | 0.000                        | 0.000                     |                         |                        | ●●                                            |          | 0.000                        | 0.000                     |                         |                        | ●         |                   |  |                        |
|                 | <i>flagellar protein FliS [Methylobacillus flagellatus KT]637938900 YP_546091</i>                                    |                              |                           |                         |                        |                                               |          |                              |                           |                         |                        |           |                   |  |                        |
| <b>MFLA1984</b> |                                                                                                                      | 6.316                        | 6.505                     | 7.414                   | -0.320                 | Y ●● Y                                        | 4.46 E-2 | 23.965                       | 25.313                    | 25.791                  | -1.270                 | Y ●       |                   |  |                        |
|                 | <i>flagellar hook-associated 2-like protein [Methylobacillus flagellatus KT]637938901 YP_546092</i>                  |                              |                           |                         |                        |                                               |          |                              |                           |                         |                        |           |                   |  |                        |
| <b>MFLA1985</b> |                                                                                                                      | 0.000                        | 0.000                     |                         |                        | ●●                                            |          | 0.000                        | 0.000                     |                         |                        | ●         |                   |  |                        |
|                 | <i>flagellar protein FlaG protein [Methylobacillus flagellatus KT]637938902 YP_546093</i>                            |                              |                           |                         |                        |                                               |          |                              |                           |                         |                        |           |                   |  |                        |
| <b>MFLA1986</b> |                                                                                                                      | 0                            | 10.684                    | 10.301                  | 11.505                 | 0.383                                         | Y ●● Y   | 1.07 E-1                     | 30.769                    | 30.207                  | 31.515                 | 0.452     | Y ●               |  |                        |
|                 | <i>flagellin-like protein [Methylobacillus flagellatus KT]637938903 YP_546094</i>                                    |                              |                           |                         |                        |                                               |          |                              |                           |                         |                        |           |                   |  |                        |
| <b>MFLA1987</b> |                                                                                                                      |                              | 2.739                     | 2.739                   |                        | Y ●● Y                                        |          |                              | 21.126                    | 21.126                  |                        | Y ●       |                   |  |                        |
|                 | <i>" two component transcriptional regulator, LuxR family [Methylobacillus flagellatus KT]637938904 YP_546095 ""</i> |                              |                           |                         |                        |                                               |          |                              |                           |                         |                        |           |                   |  |                        |
| <b>MFLA1988</b> |                                                                                                                      | 0.813                        |                           | 0.813                   |                        | Y ●● Y                                        |          | 19.600                       |                           | 19.600                  |                        | Y ●       |                   |  |                        |
|                 | <i>putative signal transduction histidine kinase [Methylobacillus flagellatus KT]637938905 YP_546096</i>             |                              |                           |                         |                        |                                               |          |                              |                           |                         |                        |           |                   |  |                        |
| <b>MFLA1989</b> |                                                                                                                      | 0.000                        | 0.000                     |                         |                        | ●●                                            |          | 0.000                        | 0.000                     |                         |                        | ●         |                   |  |                        |
|                 | <i>TonB-dependent receptor [Methylobacillus flagellatus KT]637938906 YP_546097</i>                                   |                              |                           |                         |                        |                                               |          |                              |                           |                         |                        |           |                   |  |                        |
| <b>MFLA1990</b> |                                                                                                                      | 3.066                        |                           | 3.066                   |                        | Y ●● Y                                        |          | 20.950                       |                           | 20.950                  |                        | Y ●       |                   |  |                        |
|                 | <i>putative regulatory lipoprotein [Methylobacillus flagellatus KT]637938907 YP_546098</i>                           |                              |                           |                         |                        |                                               |          |                              |                           |                         |                        |           |                   |  |                        |
| <b>MFLA1991</b> |                                                                                                                      | 0.000                        | 0.000                     |                         |                        | ●●                                            |          | 0.000                        | 0.000                     |                         |                        | ●         |                   |  |                        |
|                 | <i>protein of unknown function DUF1111 [Methylobacillus flagellatus KT]637938908 YP_546099</i>                       |                              |                           |                         |                        |                                               |          |                              |                           |                         |                        |           |                   |  |                        |
| <b>MFLA1992</b> |                                                                                                                      | 3.561                        | 3.551                     | 4.556                   | -0.480                 | Y ●● Y                                        | 1.67 E-1 | 20.315                       | 20.816                    | 21.587                  | -0.858                 | Y ●       |                   |  |                        |
|                 | <i>sulphate transporter [Methylobacillus flagellatus KT]637938909 YP_546100</i>                                      |                              |                           |                         |                        |                                               |          |                              |                           |                         |                        |           |                   |  |                        |

| ORF             | AM/OH <i>M. Flagellatus</i> Spectral Count                                                                                       |                      |                   |                 |                |            | AM/OH <i>M. Flagellatus</i> Protein Intensity |                      |                   |                 |                |                        | Consensus | Spectral Count |   | Protein Intensity |  |
|-----------------|----------------------------------------------------------------------------------------------------------------------------------|----------------------|-------------------|-----------------|----------------|------------|-----------------------------------------------|----------------------|-------------------|-----------------|----------------|------------------------|-----------|----------------|---|-------------------|--|
|                 | $q$ -value                                                                                                                       | $\log_2$ Methylamine | $\log_2$ Methanol | $\log_2$ Sc Sum | $\log_2$ Ratio | Regulation | $q$ -value                                    | $\log_2$ Methylamine | $\log_2$ Methanol | $\log_2$ PI Sum | $\log_2$ Ratio | Log <sub>2</sub> Ratio |           | -7             | 0 | 7                 |  |
| <b>MFLA1993</b> | 2.04 E-13                                                                                                                        | 6.029                | 4.318             | 6.414           | 1.504          | R ●●● Y    | 1.36 E-1                                      | 24.919               | 24.173            | 25.594          | 0.397          | R ●●                   |           |                |   |                   |  |
|                 | <i>TonB-dependent siderophore receptor [Methylobacillus flagellatus KT]637938910 YP_546101</i>                                   |                      |                   |                 |                |            |                                               |                      |                   |                 |                |                        |           |                |   |                   |  |
| <b>MFLA1994</b> |                                                                                                                                  | 2.398                |                   | 2.398           |                | Y ●●● Y    |                                               | 22.890               |                   | 22.890          |                | Y ●●                   |           |                |   |                   |  |
|                 | <i>protein of unknown function DUF779 [Methylobacillus flagellatus KT]637938911 YP_546102</i>                                    |                      |                   |                 |                |            |                                               |                      |                   |                 |                |                        |           |                |   |                   |  |
| <b>MFLA1995</b> | 0                                                                                                                                | 10.426               | 7.433             | 10.597          | 2.984          | R ●●● Y    | 1.3 E-2                                       | 29.615               | 26.513            | 29.774          | 3.073          | R ●●                   |           |                |   |                   |  |
|                 | <i>Lactaldehyde dehydrogenase [Methylobacillus flagellatus KT]637938912 YP_546103</i>                                            |                      |                   |                 |                |            |                                               |                      |                   |                 |                |                        |           |                |   |                   |  |
| <b>MFLA1996</b> |                                                                                                                                  | 5.837                | 6.104             | 6.976           | -0.262         | Y ●●● Y    | 1.1 E-2                                       | 24.323               | 25.054            | 25.734          | -0.726         | Y ●●                   |           |                |   |                   |  |
|                 | <i>" transcriptional regulator, MerR family [Methylobacillus flagellatus KT]637938914 YP_546104 ""</i>                           |                      |                   |                 |                |            |                                               |                      |                   |                 |                |                        |           |                |   |                   |  |
| <b>MFLA1997</b> | 5.82 E-13                                                                                                                        | 5.725                | 6.937             | 7.454           | -1.155         | G ●●● Y    | 1.41 E-2                                      | 24.513               | 25.381            | 26.011          | -0.874         | G ●●                   |           |                |   |                   |  |
|                 | <i>" integration host factor, alpha subunit [Methylobacillus flagellatus KT]637938915 YP_546105 ""</i>                           |                      |                   |                 |                |            |                                               |                      |                   |                 |                |                        |           |                |   |                   |  |
| <b>MFLA1998</b> |                                                                                                                                  | 6.119                | 6.569             | 7.361           | -0.408         | Y ●●● Y    | 9.29 E-2                                      | 25.157               | 25.505            | 26.341          | -0.364         | Y ●●                   |           |                |   |                   |  |
|                 | <i>" phenylalanyl-tRNA synthetase, beta subunit [Methylobacillus flagellatus KT]637938916 YP_546106 ""</i>                       |                      |                   |                 |                |            |                                               |                      |                   |                 |                |                        |           |                |   |                   |  |
| <b>MFLA1999</b> | 3.19 E-2                                                                                                                         | 5.922                | 5.476             | 6.716           | 0.429          | Y ●●● Y    | 1.5 E-1                                       | 23.706               | 24.088            | 24.910          | -0.252         | Y ●●                   |           |                |   |                   |  |
|                 | <i>" phenylalanyl-tRNA synthetase, alpha subunit [Methylobacillus flagellatus KT]637938917 YP_546107 ""</i>                      |                      |                   |                 |                |            |                                               |                      |                   |                 |                |                        |           |                |   |                   |  |
| <b>MFLA2000</b> |                                                                                                                                  | 5.165                | 4.056             | 5.714           | 0.844          | Y ●●● Y    | 1.08 E-2                                      | 27.550               | 26.572            | 28.143          | 0.994          | Y ●●                   |           |                |   |                   |  |
|                 | <i>ribosomal protein L20 [Methylobacillus flagellatus KT]637938918 YP_546108</i>                                                 |                      |                   |                 |                |            |                                               |                      |                   |                 |                |                        |           |                |   |                   |  |
| <b>MFLA2001</b> | 1.98 E-6                                                                                                                         | 5.206                | 4.729             | 5.987           | 1.521          | R ●●● Y    | 2.78 E-1                                      | 22.454               | 23.451            | 24.037          | 0.026          | Y ●●                   |           |                |   |                   |  |
|                 | <i>ribosomal protein L35 [Methylobacillus flagellatus KT]637938919 YP_546109</i>                                                 |                      |                   |                 |                |            |                                               |                      |                   |                 |                |                        |           |                |   |                   |  |
| <b>MFLA2002</b> | 2.53 E-14                                                                                                                        | 7.015                | 5.986             | 7.590           | 1.231          | R ●●● Y    | 4.63 E-2                                      | 25.580               | 26.112            | 26.871          | -0.510         | Y ●●                   |           |                |   |                   |  |
|                 | <i>translation initiation factor IF-3 [Methylobacillus flagellatus KT]637938920 YP_546110</i>                                    |                      |                   |                 |                |            |                                               |                      |                   |                 |                |                        |           |                |   |                   |  |
| <b>MFLA2003</b> | 1.87 E-4                                                                                                                         | 7.796                | 7.405             | 8.614           | 0.372          | Y ●●● Y    | 1.29 E-1                                      | 26.104               | 26.447            | 27.286          | -0.439         | Y ●●                   |           |                |   |                   |  |
|                 | <i>threonyl-tRNA synthetase [Methylobacillus flagellatus KT]637938921 YP_546111</i>                                              |                      |                   |                 |                |            |                                               |                      |                   |                 |                |                        |           |                |   |                   |  |
| <b>MFLA2004</b> |                                                                                                                                  | 3.692                | 3.540             | 4.618           | 0.190          | Y ●●● Y    | 1.98 E-1                                      | 23.035               | 23.326            | 24.188          | -0.405         | Y ●●                   |           |                |   |                   |  |
|                 | <i>hypothetical protein [Methylobacillus flagellatus KT]637938922 YP_546112</i>                                                  |                      |                   |                 |                |            |                                               |                      |                   |                 |                |                        |           |                |   |                   |  |
| <b>MFLA2005</b> |                                                                                                                                  | 0.000                | 0.000             |                 |                | ●●●        |                                               | 0.000                | 0.000             |                 |                | ●●●                    |           |                |   |                   |  |
|                 | <i>hypothetical protein [Methylobacillus flagellatus KT]637938923 YP_546113</i>                                                  |                      |                   |                 |                |            |                                               |                      |                   |                 |                |                        |           |                |   |                   |  |
| <b>MFLA2006</b> |                                                                                                                                  | 0.000                | 0.000             |                 |                | ●●●        |                                               | 0.000                | 0.000             |                 |                | ●●●                    |           |                |   |                   |  |
|                 | <i>hypothetical protein [Methylobacillus flagellatus KT]637938924 YP_546114</i>                                                  |                      |                   |                 |                |            |                                               |                      |                   |                 |                |                        |           |                |   |                   |  |
| <b>MFLA2007</b> |                                                                                                                                  | 4.740                | 4.707             | 5.724           | -0.047         | Y ●●● Y    | 9.62 E-2                                      | 24.010               | 23.839            | 24.927          | 0.184          | Y ●●                   |           |                |   |                   |  |
|                 | <i>UDP-glucose 4-epimerase [Methylobacillus flagellatus KT]637938925 YP_546115</i>                                               |                      |                   |                 |                |            |                                               |                      |                   |                 |                |                        |           |                |   |                   |  |
| <b>MFLA2008</b> | 0                                                                                                                                | 8.578                | 9.352             | 10.017          | -0.757         | G ●●● Y    | 1.07 E-2                                      | 27.065               | 28.298            | 28.809          | -1.224         | G ●●                   |           |                |   |                   |  |
|                 | <i>" dTDP-glucose 4,6-dehydratase [Methylobacillus flagellatus KT]637938926 YP_546116 ""</i>                                     |                      |                   |                 |                |            |                                               |                      |                   |                 |                |                        |           |                |   |                   |  |
| <b>MFLA2009</b> | 1.38 E-1                                                                                                                         | 6.725                | 6.793             | 7.759           | -0.062         | Y ●●● G    | 9.51 E-3                                      | 25.522               | 26.994            | 27.438          | -1.462         | Y ●●                   |           |                |   |                   |  |
|                 | <i>glucose-1-phosphate thymidyltransferase [Methylobacillus flagellatus KT]637938927 YP_546117</i>                               |                      |                   |                 |                |            |                                               |                      |                   |                 |                |                        |           |                |   |                   |  |
| <b>MFLA2010</b> | 7.12 E-6                                                                                                                         | 6.620                | 7.287             | 7.992           | -0.665         | G ●●● Y    | 3.7 E-2                                       | 26.522               | 26.969            | 27.763          | -0.465         | G ●●                   |           |                |   |                   |  |
|                 | <i>" dTDP-4-dehydrorhamnose 3,5-epimerase [Methylobacillus flagellatus KT]637938928 YP_546118 ""</i>                             |                      |                   |                 |                |            |                                               |                      |                   |                 |                |                        |           |                |   |                   |  |
| <b>MFLA2011</b> | 1.35 E-1                                                                                                                         | 6.203                | 6.074             | 7.140           | 0.134          | Y ●●● Y    | 1.66 E-2                                      | 26.444               | 26.767            | 27.614          | -0.325         | Y ●●                   |           |                |   |                   |  |
|                 | <i>dTDP-4-dehydrorhamnose reductase [Methylobacillus flagellatus KT]637938929 YP_546119</i>                                      |                      |                   |                 |                |            |                                               |                      |                   |                 |                |                        |           |                |   |                   |  |
| <b>MFLA2012</b> | 1.79 E-11                                                                                                                        | 7.167                | 7.888             | 8.572           | -0.753         | G ●●● Y    | 1.35 E-2                                      | 26.811               | 27.776            | 28.373          | -1.002         | G ●●                   |           |                |   |                   |  |
|                 | <i>Mannose-1-phosphate guanylyltransferase/mannose-6-phosphate isomerase [Methylobacillus flagellatus KT]637938930 YP_546120</i> |                      |                   |                 |                |            |                                               |                      |                   |                 |                |                        |           |                |   |                   |  |
| <b>MFLA2013</b> | 4.43 E-2                                                                                                                         | 5.911                | 6.310             | 7.124           | -0.398         | Y ●●● G    | 1.12 E-7                                      | 24.176               | 25.766            | 26.180          | -1.590         | G ●●                   |           |                |   |                   |  |
|                 | <i>" glycosyltransferase, RfaG [Methylobacillus flagellatus KT]637938931 YP_546121 ""</i>                                        |                      |                   |                 |                |            |                                               |                      |                   |                 |                |                        |           |                |   |                   |  |
| <b>MFLA2014</b> | 2.45 E-2                                                                                                                         | 6.303                | 6.599             | 7.459           | -0.325         | Y ●●● Y    | 9.11 E-2                                      | 26.006               | 26.161            | 27.086          | -0.162         | Y ●●                   |           |                |   |                   |  |
|                 | <i>" glycoside hydrolase, family 5 [Methylobacillus flagellatus KT]637938932 YP_546122 ""</i>                                    |                      |                   |                 |                |            |                                               |                      |                   |                 |                |                        |           |                |   |                   |  |

| ORF             | AM/OH <i>M. Flagellatus</i> Spectral Count                                                     |                              |                           |                         |                        | AM/OH <i>M. Flagellatus</i> Protein Intensity |            |                              |                           |                         | Spectral Count         |           | Protein Intensity      |                        |
|-----------------|------------------------------------------------------------------------------------------------|------------------------------|---------------------------|-------------------------|------------------------|-----------------------------------------------|------------|------------------------------|---------------------------|-------------------------|------------------------|-----------|------------------------|------------------------|
|                 | $q$ -value                                                                                     | log <sub>2</sub> Methylamine | log <sub>2</sub> Methanol | log <sub>2</sub> Sc Sum | log <sub>2</sub> Ratio | Regulation                                    | $q$ -value | log <sub>2</sub> Methylamine | log <sub>2</sub> Methanol | log <sub>2</sub> PI Sum | log <sub>2</sub> Ratio | Consensus | Log <sub>2</sub> Ratio | Log <sub>2</sub> Ratio |
| <b>MFLA2015</b> |                                                                                                | 4.799                        | 4.194                     | 5.528                   | 0.625                  | Y ●●● Y                                       | 2.16 E-1   | 23.106                       | 22.861                    | 23.989                  | -0.041                 | Y ●●      |                        |                        |
|                 | <i>" glycosyl transferase, group 1 [Methylobacillus flagellatus KT]637938933 YP_546123 ""</i>  |                              |                           |                         |                        |                                               |            |                              |                           |                         |                        |           |                        |                        |
| <b>MFLA2016</b> |                                                                                                | 0.813                        | 2.595                     | 2.963                   | -0.764                 | Y ●●● Y                                       | 9.53 E-2   | 19.647                       | 22.454                    | 22.647                  | -1.728                 | Y ●●      |                        |                        |
|                 | <i>" glycosyl transferase, family 2 [Methylobacillus flagellatus KT]637938934 YP_546124 ""</i> |                              |                           |                         |                        |                                               |            |                              |                           |                         |                        |           |                        |                        |
| <b>MFLA2017</b> | 6.31 E-3                                                                                       | 5.056                        | 5.726                     | 6.429                   | -0.701                 | G ●●● Y                                       | 5.13 E-2   | 23.821                       | 24.925                    | 25.476                  | -1.535                 | G ●●      |                        |                        |
|                 | <i>" glycosyl transferase, family 2 [Methylobacillus flagellatus KT]637938935 YP_546125 ""</i> |                              |                           |                         |                        |                                               |            |                              |                           |                         |                        |           |                        |                        |
| <b>MFLA2018</b> |                                                                                                | 2.106                        | 1.000                     | 2.656                   | 1.106                  | Y ●●● Y                                       |            | 22.226                       | 22.757                    | 23.516                  | -0.530                 | Y ●●      |                        |                        |
|                 | <i>O-antigen polymerase [Methylobacillus flagellatus KT]637938936 YP_546126</i>                |                              |                           |                         |                        |                                               |            |                              |                           |                         |                        |           |                        |                        |
| <b>MFLA2019</b> |                                                                                                | 6.144                        | 5.679                     | 6.931                   | 0.366                  | Y ●●● Y                                       | 1.28 E-1   | 24.796                       | 25.025                    | 25.915                  | -0.258                 | Y ●●      |                        |                        |
|                 | <i>nitroreductase [Methylobacillus flagellatus KT]637938937 YP_546127</i>                      |                              |                           |                         |                        |                                               |            |                              |                           |                         |                        |           |                        |                        |
| <b>MFLA2020</b> |                                                                                                | 7.026                        | 7.308                     | 8.174                   | -0.419                 | Y ●●● Y                                       | 2.81 E-2   | 25.909                       | 26.673                    | 27.341                  | -0.796                 | Y ●●      |                        |                        |
|                 | <i>polysaccharide pyruvyl transferase [Methylobacillus flagellatus KT]637938938 YP_546128</i>  |                              |                           |                         |                        |                                               |            |                              |                           |                         |                        |           |                        |                        |
| <b>MFLA2021</b> |                                                                                                | 1.106                        | 0.000                     | 1.656                   | 1.106                  | Y ●●● Y                                       |            | 20.761                       | 18.104                    | 20.974                  | 2.657                  | Y ●●      |                        |                        |
|                 | <i>polysaccharide biosynthesis protein [Methylobacillus flagellatus KT]637938939 YP_546129</i> |                              |                           |                         |                        |                                               |            |                              |                           |                         |                        |           |                        |                        |
| <b>MFLA2022</b> |                                                                                                | 4.087                        | 4.435                     | 5.272                   | -0.325                 | Y ●●● Y                                       | 1.28 E-1   | 23.860                       | 24.209                    | 25.045                  | -0.422                 | Y ●●      |                        |                        |
|                 | <i>hypothetical protein [Methylobacillus flagellatus KT]637938940 YP_546130</i>                |                              |                           |                         |                        |                                               |            |                              |                           |                         |                        |           |                        |                        |
| <b>MFLA2023</b> |                                                                                                | 0.000                        | 0.000                     |                         |                        | ●●●                                           |            | 0.000                        | 0.000                     |                         |                        | ●●        |                        |                        |
|                 | <i>hypothetical protein [Methylobacillus flagellatus KT]637938941 YP_546131</i>                |                              |                           |                         |                        |                                               |            |                              |                           |                         |                        |           |                        |                        |
| <b>MFLA2024</b> | 0                                                                                              | 7.376                        | 8.437                     | 9.002                   | -1.079                 | G ●●● Y                                       | 4.87 E-2   | 26.292                       | 27.254                    | 27.852                  | -1.241                 | G ●●      |                        |                        |
|                 | <i>Protein-tyrosine kinase [Methylobacillus flagellatus KT]637938942 YP_546132</i>             |                              |                           |                         |                        |                                               |            |                              |                           |                         |                        |           |                        |                        |
| <b>MFLA2025</b> |                                                                                                | 7.380                        | 7.747                     | 8.575                   | -0.452                 | Y ●●● Y                                       | 1.38 E-2   | 27.001                       | 27.780                    | 28.442                  | -0.786                 | Y ●●      |                        |                        |
|                 | <i>lipopolysaccharide biosynthesis [Methylobacillus flagellatus KT]637938943 YP_546133</i>     |                              |                           |                         |                        |                                               |            |                              |                           |                         |                        |           |                        |                        |
| <b>MFLA2026</b> | 0                                                                                              | 6.785                        | 7.925                     | 8.465                   | -1.150                 | G ●●● Y                                       | 2.44 E-2   | 27.371                       | 27.825                    | 28.616                  | -0.468                 | G ●●      |                        |                        |
|                 | <i>polysaccharide export protein [Methylobacillus flagellatus KT]637938944 YP_546134</i>       |                              |                           |                         |                        |                                               |            |                              |                           |                         |                        |           |                        |                        |
| <b>MFLA2027</b> | 5.73 E-6                                                                                       | 7.968                        | 8.389                     | 9.194                   | -0.427                 | Y ●●● Y                                       | 1.01 E-2   | 28.563                       | 29.019                    | 29.809                  | -0.455                 | Y ●●      |                        |                        |
|                 | <i>hypothetical protein [Methylobacillus flagellatus KT]637938945 YP_546135</i>                |                              |                           |                         |                        |                                               |            |                              |                           |                         |                        |           |                        |                        |
| <b>MFLA2028</b> | 6.62 E-2                                                                                       | 5.719                        | 5.326                     | 6.536                   | 0.390                  | Y ●●● Y                                       | 6.6 E-2    | 23.863                       | 24.469                    | 25.198                  | -0.728                 | Y ●●      |                        |                        |
|                 | <i>sugar transferase [Methylobacillus flagellatus KT]637938946 YP_546136</i>                   |                              |                           |                         |                        |                                               |            |                              |                           |                         |                        |           |                        |                        |
| <b>MFLA2029</b> |                                                                                                | 5.549                        | 0.931                     | 5.607                   | 3.556                  | Y ●●● Y                                       | 1.26 E-1   | 24.671                       | 21.388                    | 24.812                  | 1.960                  | Y ●●      |                        |                        |
|                 | <i>hypothetical protein [Methylobacillus flagellatus KT]637938947 YP_546137</i>                |                              |                           |                         |                        |                                               |            |                              |                           |                         |                        |           |                        |                        |
| <b>MFLA2030</b> |                                                                                                | 0.000                        | 0.000                     |                         |                        | ●●●                                           |            | 0.000                        | 0.000                     |                         |                        | ●●        |                        |                        |
|                 | <i>Abortive infection protein [Methylobacillus flagellatus KT]637938948 YP_546138</i>          |                              |                           |                         |                        |                                               |            |                              |                           |                         |                        |           |                        |                        |
| <b>MFLA2031</b> |                                                                                                | 0.000                        | 0.000                     |                         |                        | ●●●                                           |            | 0.000                        | 0.000                     |                         |                        | ●●        |                        |                        |
|                 | <i>" TonB-dependent receptor, plug [Methylobacillus flagellatus KT]637938949 YP_546139 ""</i>  |                              |                           |                         |                        |                                               |            |                              |                           |                         |                        |           |                        |                        |
| <b>MFLA2032</b> |                                                                                                | 3.913                        | 4.625                     | 5.312                   | 0.311                  | Y ●●● Y                                       | 1.96 E-1   | 20.781                       | 21.633                    | 22.269                  | 0.180                  | Y ●●      |                        |                        |
|                 | <i>2OG-Fe(II) oxygenase [Methylobacillus flagellatus KT]637938951 YP_546140</i>                |                              |                           |                         |                        |                                               |            |                              |                           |                         |                        |           |                        |                        |
| <b>MFLA2033</b> |                                                                                                |                              | 3.162                     | 3.162                   |                        | Y ●●● Y                                       |            |                              | 20.844                    | 20.844                  |                        | Y ●●      |                        |                        |
|                 | <i>Pyridoxal-dependent decarboxylase [Methylobacillus flagellatus KT]637938952 YP_546141</i>   |                              |                           |                         |                        |                                               |            |                              |                           |                         |                        |           |                        |                        |
| <b>MFLA2034</b> | 0                                                                                              | 7.079                        | 8.176                     | 8.729                   | -1.144                 | G ●●● Y                                       | 7.05 E-2   | 28.918                       | 29.390                    | 30.173                  | -0.524                 | G ●●      |                        |                        |
|                 | <i>" MxaD protein, putative [Methylobacillus flagellatus KT]637938953 YP_546142 ""</i>         |                              |                           |                         |                        |                                               |            |                              |                           |                         |                        |           |                        |                        |
| <b>MFLA2035</b> | 2.62 E-6                                                                                       | 5.530                        | 4.090                     | 5.983                   | 1.402                  | R ●●● Y                                       | 1.49 E-2   | 24.662                       | 23.518                    | 25.200                  | 1.139                  | R ●●      |                        |                        |
|                 | <i>" MxaL protein, putative [Methylobacillus flagellatus KT]637938954 YP_546143 ""</i>         |                              |                           |                         |                        |                                               |            |                              |                           |                         |                        |           |                        |                        |
| <b>MFLA2036</b> |                                                                                                | 4.517                        | 4.557                     | 5.537                   | -0.013                 | Y ●●● Y                                       | 5.71 E-2   | 24.792                       | 23.698                    | 25.346                  | 1.138                  | Y ●●      |                        |                        |
|                 | <i>hypothetical protein [Methylobacillus flagellatus KT]637938955 YP_546144</i>                |                              |                           |                         |                        |                                               |            |                              |                           |                         |                        |           |                        |                        |

| ORF             | AM/OH <i>M. Flagellatus</i> Spectral Count                                                                         |                              |                           |                         |                        | AM/OH <i>M. Flagellatus</i> Protein Intensity |          |                              |                           |                         | Spectral Count         |           | Protein Intensity |  | Log <sub>2</sub> Ratio |
|-----------------|--------------------------------------------------------------------------------------------------------------------|------------------------------|---------------------------|-------------------------|------------------------|-----------------------------------------------|----------|------------------------------|---------------------------|-------------------------|------------------------|-----------|-------------------|--|------------------------|
|                 | q-value                                                                                                            | log <sub>2</sub> Methylamine | log <sub>2</sub> Methanol | log <sub>2</sub> Sc Sum | log <sub>2</sub> Ratio | Regulation                                    | q-value  | log <sub>2</sub> Methylamine | log <sub>2</sub> Methanol | log <sub>2</sub> PI Sum | log <sub>2</sub> Ratio | Consensus |                   |  |                        |
| <b>MFLA2037</b> |                                                                                                                    | 4.940                        | 3.643                     | 5.433                   | 1.057                  | Y ●● Y                                        | 7.24 E-2 | 24.347                       | 21.931                    | 24.595                  | 1.992                  | Y ●       |                   |  |                        |
|                 | " von Willebrand factor, type A [Methylobacillus flagellatus KT]637938956 YP_546145 ""                             |                              |                           |                         |                        |                                               |          |                              |                           |                         |                        |           |                   |  |                        |
| <b>MFLA2038</b> | 1.39 E-2                                                                                                           | 5.753                        | 5.406                     | 6.590                   | 0.347                  | Y ●● Y                                        | 6.44 E-2 | 25.216                       | 24.408                    | 25.868                  | 0.938                  | Y ●       |                   |  |                        |
|                 | hypothetical protein [Methylobacillus flagellatus KT]637938957 YP_546146                                           |                              |                           |                         |                        |                                               |          |                              |                           |                         |                        |           |                   |  |                        |
| <b>MFLA2039</b> | 7.88 E-8                                                                                                           | 5.596                        | 3.684                     | 5.936                   | 1.882                  | R ●● Y                                        | 9.53 E-2 | 23.060                       | 21.451                    | 23.469                  | 1.253                  | R ●       |                   |  |                        |
|                 | hypothetical protein [Methylobacillus flagellatus KT]637938958 YP_546147                                           |                              |                           |                         |                        |                                               |          |                              |                           |                         |                        |           |                   |  |                        |
| <b>MFLA2040</b> |                                                                                                                    | 8.101                        | 7.931                     | 9.019                   | 0.181                  | Y ●● Y                                        | 2.07 E-1 | 27.735                       | 27.822                    | 28.779                  | -0.069                 | Y ●       |                   |  |                        |
|                 | " ATPase associated with various cellular activities, AAA_3 [Methylobacillus flagellatus KT]637938959 YP_546148 "" |                              |                           |                         |                        |                                               |          |                              |                           |                         |                        |           |                   |  |                        |
| <b>MFLA2041</b> | 0                                                                                                                  | 6.289                        | 4.926                     | 6.763                   | 2.365                  | R ●● Y                                        | 3.14 E-2 | 27.309                       | 26.161                    | 27.846                  | 2.192                  | R ●       |                   |  |                        |
|                 | " methanol dehydrogenase, beta subunit [Methylobacillus flagellatus KT]637938960 YP_546149 ""                      |                              |                           |                         |                        |                                               |          |                              |                           |                         |                        |           |                   |  |                        |
| <b>MFLA2042</b> | 2.64 E-9                                                                                                           | 7.338                        | 7.955                     | 8.679                   | -0.622                 | G ●● Y                                        | 7.52 E-2 | 28.994                       | 29.473                    | 30.253                  | -0.563                 | G ●       |                   |  |                        |
|                 | " cytochrome c, class I [Methylobacillus flagellatus KT]637938961 YP_546150 ""                                     |                              |                           |                         |                        |                                               |          |                              |                           |                         |                        |           |                   |  |                        |
| <b>MFLA2043</b> | 3.05 E-4                                                                                                           | 8.645                        | 8.362                     | 9.510                   | 0.290                  | Y ●● Y                                        | 1.14 E-1 | 29.761                       | 29.453                    | 30.615                  | 0.265                  | Y ●       |                   |  |                        |
|                 | " extracellular solute-binding protein, family 3 [Methylobacillus flagellatus KT]637938962 YP_546151 ""            |                              |                           |                         |                        |                                               |          |                              |                           |                         |                        |           |                   |  |                        |
| <b>MFLA2044</b> | 0                                                                                                                  | 12.179                       | 11.631                    | 12.931                  | 0.527                  | R ●● Y                                        | 5.65 E-2 | 33.159                       | 32.644                    | 33.924                  | 0.489                  | R ●       |                   |  |                        |
|                 | Pyrrolo-quinoline quinone [Methylobacillus flagellatus KT]637938963 YP_546152                                      |                              |                           |                         |                        |                                               |          |                              |                           |                         |                        |           |                   |  |                        |
| <b>MFLA2045</b> | 3.9 E-2                                                                                                            | 5.130                        | 4.705                     | 5.933                   | 0.414                  | Y ●● Y                                        | 1.87 E-1 | 23.308                       | 22.974                    | 24.151                  | 0.479                  | Y ●       |                   |  |                        |
|                 | NAD-dependent epimerase/dehydratase [Methylobacillus flagellatus KT]637938964 YP_546153                            |                              |                           |                         |                        |                                               |          |                              |                           |                         |                        |           |                   |  |                        |
| <b>MFLA2046</b> |                                                                                                                    | 4.974                        | 4.850                     | 5.914                   | 0.126                  | Y ●● Y                                        | 1.76 E-1 | 24.202                       | 23.860                    | 25.041                  | 0.490                  | Y ●       |                   |  |                        |
|                 | NUDIX hydrolase [Methylobacillus flagellatus KT]637938965 YP_546154                                                |                              |                           |                         |                        |                                               |          |                              |                           |                         |                        |           |                   |  |                        |
| <b>MFLA2047</b> |                                                                                                                    | 0.000                        | 0.000                     |                         |                        | ●●                                            |          | 0.000                        | 0.000                     |                         |                        | ●         |                   |  |                        |
|                 | hypothetical protein [Methylobacillus flagellatus KT]637938966 YP_546155                                           |                              |                           |                         |                        |                                               |          |                              |                           |                         |                        |           |                   |  |                        |
| <b>MFLA2048</b> |                                                                                                                    | 0.000                        | 0.000                     |                         |                        | ●●                                            |          | 0.000                        | 0.000                     |                         |                        | ●         |                   |  |                        |
|                 | " Proton-translocating NADH-quinone oxidoreductase, chain N [Methylobacillus flagellatus KT]637938967 YP_546156 "" |                              |                           |                         |                        |                                               |          |                              |                           |                         |                        |           |                   |  |                        |
| <b>MFLA2049</b> |                                                                                                                    | 0.000                        | 0.000                     |                         |                        | ●●                                            |          | 0.000                        | 0.000                     |                         |                        | ●         |                   |  |                        |
|                 | " proton-translocating NADH-quinone oxidoreductase, chain M [Methylobacillus flagellatus KT]637938968 YP_546157 "" |                              |                           |                         |                        |                                               |          |                              |                           |                         |                        |           |                   |  |                        |
| <b>MFLA2050</b> |                                                                                                                    | 0.000                        | 0.000                     |                         |                        | ●●                                            |          | 0.000                        | 0.000                     |                         |                        | ●         |                   |  |                        |
|                 | " proton-translocating NADH-quinone oxidoreductase, chain L [Methylobacillus flagellatus KT]637938969 YP_546158 "" |                              |                           |                         |                        |                                               |          |                              |                           |                         |                        |           |                   |  |                        |
| <b>MFLA2051</b> |                                                                                                                    | 0.000                        | 0.000                     |                         |                        | ●●                                            |          | 0.000                        | 0.000                     |                         |                        | ●         |                   |  |                        |
|                 | " NADH-ubiquinone oxidoreductase, chain 4L [Methylobacillus flagellatus KT]637938970 YP_546159 ""                  |                              |                           |                         |                        |                                               |          |                              |                           |                         |                        |           |                   |  |                        |
| <b>MFLA2052</b> |                                                                                                                    | 1.843                        |                           | 1.843                   |                        | Y ●● Y                                        |          | 18.958                       |                           | 18.958                  |                        | Y ●       |                   |  |                        |
|                 | " NADH-ubiquinone/plastoquinone oxidoreductase, chain 6 [Methylobacillus flagellatus KT]637938971 YP_546160 ""     |                              |                           |                         |                        |                                               |          |                              |                           |                         |                        |           |                   |  |                        |
| <b>MFLA2053</b> |                                                                                                                    | 4.435                        | 2.226                     | 4.717                   | 2.294                  | Y ●● Y                                        | 2.52 E-2 | 23.237                       | 20.011                    | 23.383                  | 3.199                  | Y ●       |                   |  |                        |
|                 | " NADH-quinone oxidoreductase, chain I [Methylobacillus flagellatus KT]637938972 YP_546161 ""                      |                              |                           |                         |                        |                                               |          |                              |                           |                         |                        |           |                   |  |                        |
| <b>MFLA2054</b> |                                                                                                                    | 0.000                        | 0.000                     |                         |                        | ●●                                            |          | 0.000                        | 0.000                     |                         |                        | ●         |                   |  |                        |
|                 | " respiratory-chain NADH dehydrogenase, subunit 1 [Methylobacillus flagellatus KT]637938973 YP_546162 ""           |                              |                           |                         |                        |                                               |          |                              |                           |                         |                        |           |                   |  |                        |
| <b>MFLA2055</b> | 0                                                                                                                  | 7.877                        | 4.895                     | 8.049                   | 2.818                  | R ●● Y                                        | 2.67 E-2 | 27.204                       | 23.252                    | 27.294                  | 3.842                  | R ●       |                   |  |                        |
|                 | " NADH-quinone oxidoreductase, chain G [Methylobacillus flagellatus KT]637938974 YP_546163 ""                      |                              |                           |                         |                        |                                               |          |                              |                           |                         |                        |           |                   |  |                        |
| <b>MFLA2056</b> | 0                                                                                                                  | 6.870                        | 3.453                     | 6.999                   | 3.443                  | R ●● R                                        | 7.97 E-3 | 25.675                       | 21.748                    | 25.766                  | 4.013                  | R ●       |                   |  |                        |
|                 | " NADH-quinone oxidoreductase, F subunit [Methylobacillus flagellatus KT]637938975 YP_546164 ""                    |                              |                           |                         |                        |                                               |          |                              |                           |                         |                        |           |                   |  |                        |
| <b>MFLA2057</b> |                                                                                                                    | 4.053                        | 1.000                     | 4.218                   | 1.863                  | Y ●● Y                                        | 5.84 E-2 | 24.090                       | 20.077                    | 24.177                  | 2.992                  | Y ●       |                   |  |                        |
|                 | " NADH-quinone oxidoreductase, E subunit [Methylobacillus flagellatus KT]637938976 YP_546165 ""                    |                              |                           |                         |                        |                                               |          |                              |                           |                         |                        |           |                   |  |                        |
| <b>MFLA2058</b> | 0                                                                                                                  | 6.312                        | 2.372                     | 6.403                   | 3.964                  | R ●● R                                        | 4.7 E-4  | 25.915                       | 21.202                    | 25.969                  | 4.751                  | R ●       |                   |  |                        |
|                 | " NADH dehydrogenase I, D subunit [Methylobacillus flagellatus KT]637938977 YP_546166 ""                           |                              |                           |                         |                        |                                               |          |                              |                           |                         |                        |           |                   |  |                        |



| ORF             | AM/OH <i>M. Flagellatus</i> Spectral Count                                                                                   |                              |                           |                         |                        |            | AM/OH <i>M. Flagellatus</i> Protein Intensity |                              |                           |                         |                        |        | Consensus | Log <sub>2</sub> Ratio |
|-----------------|------------------------------------------------------------------------------------------------------------------------------|------------------------------|---------------------------|-------------------------|------------------------|------------|-----------------------------------------------|------------------------------|---------------------------|-------------------------|------------------------|--------|-----------|------------------------|
|                 | q-value                                                                                                                      | log <sub>2</sub> Methylamine | log <sub>2</sub> Methanol | log <sub>2</sub> Sc Sum | log <sub>2</sub> Ratio | Regulation | q-value                                       | log <sub>2</sub> Methylamine | log <sub>2</sub> Methanol | log <sub>2</sub> PI Sum | log <sub>2</sub> Ratio |        |           |                        |
| <b>MFLA2059</b> |                                                                                                                              | 4.682                        |                           | 4.682                   |                        | Y ●● Y     |                                               | 23.772                       |                           | 23.772                  |                        | Y ●    |           |                        |
|                 | <i>" NADH (or F420H2) dehydrogenase, subunit C [Methylobacillus flagellatus KT]637938978 YP_546167 ""</i>                    |                              |                           |                         |                        |            |                                               |                              |                           |                         |                        |        |           |                        |
| <b>MFLA2060</b> |                                                                                                                              | 4.120                        | 2.871                     | 4.627                   | 1.251                  | Y ●● Y     |                                               | 2.61 E-2                     | 23.320                    | 21.081                  | 23.597                 | 2.380  | Y ●       |                        |
|                 | <i>" NADH-quinone oxidoreductase, B subunit [Methylobacillus flagellatus KT]637938979 YP_546168 ""</i>                       |                              |                           |                         |                        |            |                                               |                              |                           |                         |                        |        |           |                        |
| <b>MFLA2061</b> |                                                                                                                              | 0.000                        | 0.000                     |                         |                        | ■ ■        |                                               | 0.000                        | 0.000                     | 0.000                   |                        |        | ■         |                        |
|                 | <i>" NADH-ubiquinone/plastoquinone oxidoreductase, chain 3 [Methylobacillus flagellatus KT]637938980 YP_546169 ""</i>        |                              |                           |                         |                        |            |                                               |                              |                           |                         |                        |        |           |                        |
| <b>MFLA2062</b> |                                                                                                                              | 0.000                        | 0.000                     |                         |                        | ■ ■        |                                               | 0.000                        | 0.000                     | 0.000                   |                        |        | ■         |                        |
|                 | <i>hypothetical protein [Methylobacillus flagellatus KT]637938981 YP_546170</i>                                              |                              |                           |                         |                        |            |                                               |                              |                           |                         |                        |        |           |                        |
| <b>MFLA2063</b> |                                                                                                                              | 0.000                        | 0.000                     |                         |                        | ■ ■        |                                               | 0.000                        | 0.000                     | 0.000                   |                        |        | ■         |                        |
|                 | <i>" preprotein translocase, SecG subunit [Methylobacillus flagellatus KT]637938983 YP_546171 ""</i>                         |                              |                           |                         |                        |            |                                               |                              |                           |                         |                        |        |           |                        |
| <b>MFLA2064</b> |                                                                                                                              | 2.983                        | 3.140                     | 4.064                   | 0.857                  | Y ●● Y     |                                               | 2.28 E-2                     | 22.747                    | 22.993                  | 23.875                 | 0.754  | Y ●       |                        |
|                 | <i>Triosephosphate isomerase [Methylobacillus flagellatus KT]637938984 YP_546172</i>                                         |                              |                           |                         |                        |            |                                               |                              |                           |                         |                        |        |           |                        |
| <b>MFLA2065</b> |                                                                                                                              | 2.980                        | 2.459                     | 3.743                   | 0.521                  | Y ●● Y     |                                               | 20.050                       | 20.351                    | 21.208                  | -0.301                 | Y ●    |           |                        |
|                 | <i>single-stranded-DNA-specific exonuclease RecJ [Methylobacillus flagellatus KT]637938985 YP_546173</i>                     |                              |                           |                         |                        |            |                                               |                              |                           |                         |                        |        |           |                        |
| <b>MFLA2066</b> |                                                                                                                              | 1.843                        |                           | 1.843                   |                        | Y ●● Y     |                                               | 18.925                       |                           | 18.925                  |                        |        | Y ●       |                        |
|                 | <i>hypothetical protein [Methylobacillus flagellatus KT]637938986 YP_546174</i>                                              |                              |                           |                         |                        |            |                                               |                              |                           |                         |                        |        |           |                        |
| <b>MFLA2067</b> |                                                                                                                              |                              | 0.000                     | 0.000                   |                        | Y ●● Y     |                                               |                              | 19.484                    | 19.484                  |                        |        | Y ●       |                        |
|                 | <i>" phosphohistidine phosphatase, SixA [Methylobacillus flagellatus KT]637938987 YP_546175 ""</i>                           |                              |                           |                         |                        |            |                                               |                              |                           |                         |                        |        |           |                        |
| <b>MFLA2068</b> |                                                                                                                              | 5.004                        | 3.871                     | 5.546                   | 1.118                  | Y ●● Y     |                                               | 7.7 E-2                      | 23.143                    | 22.645                  | 23.916                 | 0.517  | Y ●       |                        |
|                 | <i>putative partition-related protein [Methylobacillus flagellatus KT]637938988 YP_546176</i>                                |                              |                           |                         |                        |            |                                               |                              |                           |                         |                        |        |           |                        |
| <b>MFLA2069</b> |                                                                                                                              | 4.872                        | 3.517                     | 5.348                   | 1.391                  | Y ●● Y     |                                               | 2.74 E-2                     | 23.585                    | 22.168                  | 24.044                 | 1.377  | Y ●       |                        |
|                 | <i>adenylate cyclase [Methylobacillus flagellatus KT]637938989 YP_546177</i>                                                 |                              |                           |                         |                        |            |                                               |                              |                           |                         |                        |        |           |                        |
| <b>MFLA2070</b> |                                                                                                                              | 0.000                        | 0.000                     |                         |                        | ■ ■        |                                               | 0.000                        | 0.000                     | 0.000                   |                        |        | ■         |                        |
|                 | <i>hypothetical protein [Methylobacillus flagellatus KT]637938990 YP_546178</i>                                              |                              |                           |                         |                        |            |                                               |                              |                           |                         |                        |        |           |                        |
| <b>MFLA2071</b> |                                                                                                                              | 3.341                        | 3.505                     | 4.425                   | -0.167                 | Y ●● Y     |                                               | 5.51 E-2                     | 21.709                    | 22.346                  | 23.062                 | -0.698 | Y ●       |                        |
|                 | <i>TrkA-N [Methylobacillus flagellatus KT]637938991 YP_546179</i>                                                            |                              |                           |                         |                        |            |                                               |                              |                           |                         |                        |        |           |                        |
| <b>MFLA2072</b> |                                                                                                                              | 1.106                        |                           | 1.106                   |                        | Y ●● Y     |                                               | 19.198                       |                           | 19.198                  |                        |        | Y ●       |                        |
|                 | <i>Class I peptide chain release factor [Methylobacillus flagellatus KT]637938992 YP_546180</i>                              |                              |                           |                         |                        |            |                                               |                              |                           |                         |                        |        |           |                        |
| <b>MFLA2073</b> |                                                                                                                              | 4.714                        | 3.866                     | 5.352                   | 0.914                  | Y ●● R     |                                               | 1.97 E-3                     | 23.242                    | 22.622                  | 23.965                 | 0.620  | R ●       |                        |
|                 | <i>Leucyl aminopeptidase [Methylobacillus flagellatus KT]637938993 YP_546181</i>                                             |                              |                           |                         |                        |            |                                               |                              |                           |                         |                        |        |           |                        |
| <b>MFLA2074</b> |                                                                                                                              | 6.75 E-9                     | 8.345                     | 8.800                   | 9.590                  | Y ●● Y     |                                               | 1.16 E-1                     | 27.734                    | 28.099                  | 28.928                 | -0.475 | Y ●       |                        |
|                 | <i>" 2-oxo-acid dehydrogenase E1 component, homodimeric type [Methylobacillus flagellatus KT]637938994 YP_546182 ""</i>      |                              |                           |                         |                        |            |                                               |                              |                           |                         |                        |        |           |                        |
| <b>MFLA2075</b> |                                                                                                                              | 2.99 E-2                     | 6.954                     | 7.117                   | 8.038                  | Y ●● Y     |                                               | 2.7 E-2                      | 26.405                    | 26.819                  | 27.627                 | -0.425 | Y ●       |                        |
|                 | <i>catalytic domain of components of various dehydrogenase complexes [Methylobacillus flagellatus KT]637938995 YP_546183</i> |                              |                           |                         |                        |            |                                               |                              |                           |                         |                        |        |           |                        |
| <b>MFLA2076</b> |                                                                                                                              | 4.82 E-2                     | 6.483                     | 6.471                   | 7.477                  | Y ●● Y     |                                               | 6.73 E-2                     | 26.014                    | 26.379                  | 27.208                 | -0.354 | Y ●       |                        |
|                 | <i>Dihydropyrimidine dehydrogenase [Methylobacillus flagellatus KT]637938996 YP_546184</i>                                   |                              |                           |                         |                        |            |                                               |                              |                           |                         |                        |        |           |                        |
| <b>MFLA2077</b> |                                                                                                                              | 3.106                        | 4.520                     | 4.980                   | -0.076                 | Y ●● Y     |                                               | 1.57 E-1                     | 21.259                    | 23.990                  | 24.193                 | -0.959 | Y ●       |                        |
|                 | <i>hypothetical protein [Methylobacillus flagellatus KT]637938997 YP_546185</i>                                              |                              |                           |                         |                        |            |                                               |                              |                           |                         |                        |        |           |                        |
| <b>MFLA2078</b> |                                                                                                                              | 0.000                        | 0.000                     |                         |                        | ■ ■        |                                               | 0.000                        | 0.000                     | 0.000                   |                        |        | ■         |                        |
|                 | <i>hypothetical protein [Methylobacillus flagellatus KT]637938998 YP_546186</i>                                              |                              |                           |                         |                        |            |                                               |                              |                           |                         |                        |        |           |                        |
| <b>MFLA2079</b> |                                                                                                                              | 2.906                        | 3.254                     | 4.091                   | -0.410                 | Y ●● Y     |                                               | 2.54 E-2                     | 21.297                    | 23.977                  | 24.186                 | -2.605 | Y ●       |                        |
|                 | <i>hypothetical protein [Methylobacillus flagellatus KT]637938999 YP_546187</i>                                              |                              |                           |                         |                        |            |                                               |                              |                           |                         |                        |        |           |                        |
| <b>MFLA2080</b> |                                                                                                                              | 1.813                        | 2.700                     | 3.324                   | -0.887                 | Y ●● Y     |                                               | 19.337                       | 20.762                    | 21.219                  | -1.425                 | Y ●    |           |                        |
|                 | <i>" putative transcriptional acitvator, Baf [Methylobacillus flagellatus KT]637939000 YP_546188 ""</i>                      |                              |                           |                         |                        |            |                                               |                              |                           |                         |                        |        |           |                        |



| ORF             | AM/OH <i>M. Flagellatus</i> Spectral Count                                                                                         |                      |                   |                 |                |            | AM/OH <i>M. Flagellatus</i> Protein Intensity |                      |                   |                 |                |           | Spectral Count         |  | Protein Intensity |  |
|-----------------|------------------------------------------------------------------------------------------------------------------------------------|----------------------|-------------------|-----------------|----------------|------------|-----------------------------------------------|----------------------|-------------------|-----------------|----------------|-----------|------------------------|--|-------------------|--|
|                 | $q$ -value                                                                                                                         | $\log_2$ Methylamine | $\log_2$ Methanol | $\log_2$ Sc Sum | $\log_2$ Ratio | Regulation | $q$ -value                                    | $\log_2$ Methylamine | $\log_2$ Methanol | $\log_2$ PI Sum | $\log_2$ Ratio | Consensus | Log <sub>2</sub> Ratio |  |                   |  |
| <b>MFLA2081</b> |                                                                                                                                    | 3.106                |                   | 3.106           |                | Y ●●● Y    |                                               | 20.435               |                   | 20.435          |                | Y ●       |                        |  |                   |  |
|                 | <i>Biotin--acetyl-CoA-carboxylase ligase [Methylobacillus flagellatus KT]637939001 YP_546189</i>                                   |                      |                   |                 |                |            |                                               |                      |                   |                 |                |           |                        |  |                   |  |
| <b>MFLA2082</b> | 3.33 E-2                                                                                                                           | 7.133                | 7.331             | 8.235           | -0.214         | Y ●●● Y    | 2.06 E-2                                      | 26.102               | 27.015            | 27.630          | -0.974         | Y ●       |                        |  |                   |  |
|                 | <i>glutaminyl-tRNA synthetase [Methylobacillus flagellatus KT]637939002 YP_546190</i>                                              |                      |                   |                 |                |            |                                               |                      |                   |                 |                |           |                        |  |                   |  |
| <b>MFLA2083</b> |                                                                                                                                    | 2.906                | 0.931             | 3.233           | 0.736          | Y ●●● Y    | 6.85 E-2                                      | 19.934               | 20.172            | 21.058          | -1.329         | Y ●       |                        |  |                   |  |
|                 | <i>" flavin reductase-like, FMN-binding [Methylobacillus flagellatus KT]637939003 YP_546191 ""</i>                                 |                      |                   |                 |                |            |                                               |                      |                   |                 |                |           |                        |  |                   |  |
| <b>MFLA2084</b> |                                                                                                                                    | 0.000                | 0.000             |                 |                | ■ ■        |                                               | 0.000                | 0.000             |                 |                | ■         |                        |  |                   |  |
|                 | <i>hypothetical protein [Methylobacillus flagellatus KT]637939004 YP_546192</i>                                                    |                      |                   |                 |                |            |                                               |                      |                   |                 |                |           |                        |  |                   |  |
| <b>MFLA2085</b> |                                                                                                                                    |                      | 1.807             | 1.807           |                | Y ●●● Y    |                                               |                      | 18.942            | 18.942          |                | Y ●       |                        |  |                   |  |
|                 | <i>peptide methionine sulfoxide reductase [Methylobacillus flagellatus KT]637939005 YP_546193</i>                                  |                      |                   |                 |                |            |                                               |                      |                   |                 |                |           |                        |  |                   |  |
| <b>MFLA2086</b> |                                                                                                                                    | 1.521                | 0.000             | 1.952           | 1.521          | Y ●●● Y    |                                               | 19.060               | 20.827            | 21.199          | -1.767         | Y ●       |                        |  |                   |  |
|                 | <i>" Cobyric acid a,c-diamide synthase [Methylobacillus flagellatus KT]637939006 YP_546194 ""</i>                                  |                      |                   |                 |                |            |                                               |                      |                   |                 |                |           |                        |  |                   |  |
| <b>MFLA2087</b> |                                                                                                                                    | 1.967                | 1.585             | 2.788           | -0.626         | Y ●●● Y    | 9.64 E-2                                      | 21.731               | 18.808            | 21.910          | 1.832          | Y ●       |                        |  |                   |  |
|                 | <i>3-deoxy-D-manno-octulosonate cytidyltransferase [Methylobacillus flagellatus KT]637939013 YP_546195</i>                         |                      |                   |                 |                |            |                                               |                      |                   |                 |                |           |                        |  |                   |  |
| <b>MFLA2088</b> |                                                                                                                                    | 4.060                | 5.196             | 5.737           | -1.136         | Y ●●● Y    | 1.96 E-1                                      | 25.294               | 25.228            | 26.261          | 0.068          | Y ●       |                        |  |                   |  |
|                 | <i>protein of unknown function DUF343 [Methylobacillus flagellatus KT]637939014 YP_546196</i>                                      |                      |                   |                 |                |            |                                               |                      |                   |                 |                |           |                        |  |                   |  |
| <b>MFLA2089</b> |                                                                                                                                    | 4.370                | 4.679             | 5.533           | -0.454         | Y ●●● Y    | 9.18 E-2                                      | 22.549               | 23.132            | 23.870          | -0.610         | Y ●       |                        |  |                   |  |
|                 | <i>tetraacyldisaccharide 4'-kinase [Methylobacillus flagellatus KT]637939015 YP_546197</i>                                         |                      |                   |                 |                |            |                                               |                      |                   |                 |                |           |                        |  |                   |  |
| <b>MFLA2090</b> |                                                                                                                                    | 3.899                | 5.145             | 5.653           | -1.241         | Y ●●● Y    | 1.89 E-2                                      | 22.593               | 23.495            | 24.113          | -0.922         | Y ●       |                        |  |                   |  |
|                 | <i>Lipid A export ATP-binding/permease protein MsbA [Methylobacillus flagellatus KT]637939016 YP_546198</i>                        |                      |                   |                 |                |            |                                               |                      |                   |                 |                |           |                        |  |                   |  |
| <b>MFLA2091</b> | 2.35 E-6                                                                                                                           | 5.672                | 4.098             | 6.090           | 1.579          | R ●●● Y    | 1.53 E-2                                      | 24.688               | 23.889            | 25.343          | 0.799          | R ●       |                        |  |                   |  |
|                 | <i>Biopolymer transport protein ExbD/ToIR [Methylobacillus flagellatus KT]637939017 YP_546199</i>                                  |                      |                   |                 |                |            |                                               |                      |                   |                 |                |           |                        |  |                   |  |
| <b>MFLA2092</b> | 1.21 E-2                                                                                                                           | 6.402                | 6.459             | 7.431           | -0.092         | Y ●●● Y    | 1.34 E-1                                      | 25.701               | 25.853            | 26.779          | -0.174         | Y ●       |                        |  |                   |  |
|                 | <i>MotA/ToIQ/ExbB proton channel [Methylobacillus flagellatus KT]637939018 YP_546200</i>                                           |                      |                   |                 |                |            |                                               |                      |                   |                 |                |           |                        |  |                   |  |
| <b>MFLA2093</b> |                                                                                                                                    | 0.000                | 0.000             |                 |                | ■ ■        |                                               | 0.000                | 0.000             |                 |                | ■         |                        |  |                   |  |
|                 | <i>DNA internalization-related competence protein ComEC/Rec2 [Methylobacillus flagellatus KT]637939019 YP_546201</i>               |                      |                   |                 |                |            |                                               |                      |                   |                 |                |           |                        |  |                   |  |
| <b>MFLA2094</b> |                                                                                                                                    | 4.413                | 2.871             | 4.839           | 1.544          | Y ●●● Y    | 2.42 E-1                                      | 22.492               | 22.390            | 23.442          | -0.051         | Y ●       |                        |  |                   |  |
|                 | <i>" Lipoprotein releasing system, ATP-binding protein [Methylobacillus flagellatus KT]637939020 YP_546202 ""</i>                  |                      |                   |                 |                |            |                                               |                      |                   |                 |                |           |                        |  |                   |  |
| <b>MFLA2095</b> |                                                                                                                                    | 3.159                | 2.941             | 4.054           | -0.091         | Y ●●● R    | 7.12 E-3                                      | 21.644               | 21.131            | 22.410          | 0.512          | Y ●       |                        |  |                   |  |
|                 | <i>" Lipoprotein releasing system, transmembrane protein, LoIC/E family [Methylobacillus flagellatus KT]637939021 YP_546203 ""</i> |                      |                   |                 |                |            |                                               |                      |                   |                 |                |           |                        |  |                   |  |
| <b>MFLA2096</b> |                                                                                                                                    | 2.521                | 4.086             | 4.506           | -0.175         | Y ●●● Y    | 1.46 E-1                                      | 19.724               | 23.629            | 23.722          | -1.871         | Y ●       |                        |  |                   |  |
|                 | <i>hypothetical protein [Methylobacillus flagellatus KT]637939022 YP_546204</i>                                                    |                      |                   |                 |                |            |                                               |                      |                   |                 |                |           |                        |  |                   |  |
| <b>MFLA2097</b> |                                                                                                                                    | 2.691                | 2.668             | 3.679           | 0.022          | Y ●●● Y    |                                               | 21.040               | 20.974            | 22.007          | 0.066          | Y ●       |                        |  |                   |  |
|                 | <i>" riboflavin synthase, alpha subunit [Methylobacillus flagellatus KT]637939023 YP_546205 ""</i>                                 |                      |                   |                 |                |            |                                               |                      |                   |                 |                |           |                        |  |                   |  |
| <b>MFLA2098</b> | 1.27 E-4                                                                                                                           | 6.067                | 6.598             | 7.357           | -0.616         | G ●●● Y    | 4.78 E-2                                      | 24.896               | 25.493            | 26.225          | -0.639         | G ●       |                        |  |                   |  |
|                 | <i>" 3,4-dihydroxy-2-butanone 4-phosphate synthase [Methylobacillus flagellatus KT]637939024 YP_546206 ""</i>                      |                      |                   |                 |                |            |                                               |                      |                   |                 |                |           |                        |  |                   |  |
| <b>MFLA2099</b> |                                                                                                                                    | 3.718                | 4.548             | 5.192           | -0.817         | Y ●●● Y    | 5.77 E-2                                      | 22.869               | 24.192            | 24.677          | -2.146         | Y ●       |                        |  |                   |  |
|                 | <i>protein of unknown function DUF179 [Methylobacillus flagellatus KT]637939025 YP_546207</i>                                      |                      |                   |                 |                |            |                                               |                      |                   |                 |                |           |                        |  |                   |  |
| <b>MFLA2100</b> |                                                                                                                                    |                      | 1.322             | 1.322           |                | Y ●●● Y    |                                               |                      | 21.053            | 21.053          |                | Y ●       |                        |  |                   |  |
|                 | <i>Holliday junction resolvase YqgF [Methylobacillus flagellatus KT]637939026 YP_546208</i>                                        |                      |                   |                 |                |            |                                               |                      |                   |                 |                |           |                        |  |                   |  |
| <b>MFLA2101</b> |                                                                                                                                    | 5.405                | 5.975             | 6.718           | -0.533         | Y ●●● G    | 4.7 E-4                                       | 24.174               | 25.237            | 25.801          | -1.064         | G ●       |                        |  |                   |  |
|                 | <i>phosphoribosyltransferase [Methylobacillus flagellatus KT]637939027 YP_546209</i>                                               |                      |                   |                 |                |            |                                               |                      |                   |                 |                |           |                        |  |                   |  |
| <b>MFLA2102</b> | 1.06 E-3                                                                                                                           | 6.547                | 7.012             | 7.798           | -0.466         | Y ●●● Y    | 9.62 E-2                                      | 25.414               | 25.711            | 26.570          | -0.309         | Y ●       |                        |  |                   |  |
|                 | <i>aspartate carbamoyltransferase [Methylobacillus flagellatus KT]637939028 YP_546210</i>                                          |                      |                   |                 |                |            |                                               |                      |                   |                 |                |           |                        |  |                   |  |

| ORF             | AM/OH <i>M. Flagellatus</i> Spectral Count                                                                       |                              |                           |                         |                        |            | AM/OH <i>M. Flagellatus</i> Protein Intensity |                              |                           |                         |                        |                        | Consensus | Spectral Count |   | Protein Intensity |  |
|-----------------|------------------------------------------------------------------------------------------------------------------|------------------------------|---------------------------|-------------------------|------------------------|------------|-----------------------------------------------|------------------------------|---------------------------|-------------------------|------------------------|------------------------|-----------|----------------|---|-------------------|--|
|                 | q-value                                                                                                          | log <sub>2</sub> Methylamine | log <sub>2</sub> Methanol | log <sub>2</sub> Sc Sum | log <sub>2</sub> Ratio | Regulation | q-value                                       | log <sub>2</sub> Methylamine | log <sub>2</sub> Methanol | log <sub>2</sub> PI Sum | log <sub>2</sub> Ratio | Log <sub>2</sub> Ratio |           | -7             | 0 | 7                 |  |
| <b>MFLA2103</b> | 1.77 E-7                                                                                                         | 5.367                        | 6.408                     | 6.980                   | -1.066                 | G ●● Y     | 2.06 E-2                                      | 24.442                       | 25.539                    | 26.093                  | -1.164                 | G ●                    |           |                |   |                   |  |
|                 | " dihydroorotase, multifunctional complex type [Methylobacillus flagellatus KT]637939029 YP_546211 ""            |                              |                           |                         |                        |            |                                               |                              |                           |                         |                        |                        |           |                |   |                   |  |
| <b>MFLA2104</b> |                                                                                                                  | 0.000                        | 0.000                     |                         |                        | ■          |                                               | 0.000                        |                           | 0.000                   |                        | ■                      |           |                |   |                   |  |
|                 | Twin-arginine translocation pathway signal [Methylobacillus flagellatus KT]637939030 YP_546212                   |                              |                           |                         |                        |            |                                               |                              |                           |                         |                        |                        |           |                |   |                   |  |
| <b>MFLA2105</b> |                                                                                                                  | 0.000                        | 0.000                     |                         |                        | ■          |                                               | 0.000                        |                           | 0.000                   |                        | ■                      |           |                |   |                   |  |
|                 | Integral membrane protein TerC [Methylobacillus flagellatus KT]637939031 YP_546213                               |                              |                           |                         |                        |            |                                               |                              |                           |                         |                        |                        |           |                |   |                   |  |
| <b>MFLA2106</b> | 4.246                                                                                                            | 2.923                        | 4.731                     | 0.625                   | Y ●● Y                 |            | 2.07 E-1                                      | 22.032                       | 22.473                    | 23.269                  | -1.385                 | Y ●                    |           |                |   |                   |  |
|                 | twitching motility protein [Methylobacillus flagellatus KT]637939032 YP_546214                                   |                              |                           |                         |                        |            |                                               |                              |                           |                         |                        |                        |           |                |   |                   |  |
| <b>MFLA2107</b> | 5.966                                                                                                            | 5.510                        | 6.756                     | 0.422                   | Y ●● Y                 |            | 2.48 E-1                                      | 24.703                       | 24.758                    | 25.731                  | -0.063                 | Y ●                    |           |                |   |                   |  |
|                 | twitching motility protein [Methylobacillus flagellatus KT]637939033 YP_546215                                   |                              |                           |                         |                        |            |                                               |                              |                           |                         |                        |                        |           |                |   |                   |  |
| <b>MFLA2108</b> | 4.922                                                                                                            | 4.251                        | 5.625                     | 0.664                   | Y ●● Y                 |            | 1.5 E-2                                       | 22.851                       | 23.587                    | 24.265                  | -0.759                 | Y ●                    |           |                |   |                   |  |
|                 | Protein of unknown function UPF0001 [Methylobacillus flagellatus KT]637939034 YP_546216                          |                              |                           |                         |                        |            |                                               |                              |                           |                         |                        |                        |           |                |   |                   |  |
| <b>MFLA2109</b> | 1.106                                                                                                            | 4.071                        | 4.245                     | -1.904                  | Y ●● Y                 |            | 2.76 E-2                                      | 22.003                       | 24.179                    | 24.468                  | -1.176                 | Y ●                    |           |                |   |                   |  |
|                 | pyrroline-5-carboxylate reductase [Methylobacillus flagellatus KT]637939035 YP_546217                            |                              |                           |                         |                        |            |                                               |                              |                           |                         |                        |                        |           |                |   |                   |  |
| <b>MFLA2110</b> |                                                                                                                  | 0.000                        | 0.000                     |                         |                        | ■          |                                               | 0.000                        |                           | 0.000                   |                        | ■                      |           |                |   |                   |  |
|                 | protein of unknown function YGGT [Methylobacillus flagellatus KT]637939036 YP_546218                             |                              |                           |                         |                        |            |                                               |                              |                           |                         |                        |                        |           |                |   |                   |  |
| <b>MFLA2111</b> | 3.34 E-2                                                                                                         | 5.535                        | 5.156                     | 6.358                   | 0.317                  | Y ●● Y     | 1.33 E-1                                      | 25.461                       | 25.116                    | 26.299                  | 0.296                  | Y ●                    |           |                |   |                   |  |
|                 | " NADP oxidoreductase, coenzyme F420-dependent [Methylobacillus flagellatus KT]637939037 YP_546219 ""            |                              |                           |                         |                        |            |                                               |                              |                           |                         |                        |                        |           |                |   |                   |  |
| <b>MFLA2112</b> | 5.91 E-11                                                                                                        | 5.826                        | 3.162                     | 6.037                   | 2.655                  | R ●● Y     | 1.03 E-2                                      | 25.167                       | 21.597                    | 25.284                  | 3.547                  | R ●                    |           |                |   |                   |  |
|                 | " ribonuclease, Rne/Rng family [Methylobacillus flagellatus KT]637939038 YP_546220 ""                            |                              |                           |                         |                        |            |                                               |                              |                           |                         |                        |                        |           |                |   |                   |  |
| <b>MFLA2113</b> |                                                                                                                  | 0.521                        | 0.931                     | 1.741                   | -0.411                 | Y ●● Y     |                                               | 20.795                       | 19.965                    | 21.439                  | 0.830                  | Y ●                    |           |                |   |                   |  |
|                 | maf protein [Methylobacillus flagellatus KT]637939039 YP_546221                                                  |                              |                           |                         |                        |            |                                               |                              |                           |                         |                        |                        |           |                |   |                   |  |
| <b>MFLA2114</b> | 1.12 E-1                                                                                                         | 4.660                        | 5.271                     | 5.998                   | -0.671                 | Y ●● Y     | 2.41 E-1                                      | 24.635                       | 24.712                    | 25.674                  | -0.167                 | Y ●                    |           |                |   |                   |  |
|                 | NUDIX hydrolase [Methylobacillus flagellatus KT]637939040 YP_546222                                              |                              |                           |                         |                        |            |                                               |                              |                           |                         |                        |                        |           |                |   |                   |  |
| <b>MFLA2115</b> | 4.95 E-3                                                                                                         | 5.717                        | 6.211                     | 6.985                   | -0.527                 | G ●● Y     | 3.7 E-2                                       | 24.489                       | 24.908                    | 25.714                  | -0.433                 | G ●                    |           |                |   |                   |  |
|                 | tRNA (5-methylaminomethyl-2-thiouridylate)-methyltransferase [Methylobacillus flagellatus KT]637939041 YP_546223 |                              |                           |                         |                        |            |                                               |                              |                           |                         |                        |                        |           |                |   |                   |  |
| <b>MFLA2116</b> |                                                                                                                  | 4.888                        | 5.019                     | 5.955                   | -0.130                 | Y ●● Y     | 1.18 E-2                                      | 24.062                       | 25.305                    | 25.814                  | -1.260                 | Y ●                    |           |                |   |                   |  |
|                 | glutathione S-transferase-like protein [Methylobacillus flagellatus KT]637939042 YP_546224                       |                              |                           |                         |                        |            |                                               |                              |                           |                         |                        |                        |           |                |   |                   |  |
| <b>MFLA2117</b> |                                                                                                                  | 2.923                        | 3.240                     | 4.090                   | -0.667                 | Y ●● G     | 8.83 E-3                                      | 21.852                       | 22.981                    | 23.524                  | -1.140                 | G ●                    |           |                |   |                   |  |
|                 | nicotinate-nucleotide pyrophosphorylase [Methylobacillus flagellatus KT]637939043 YP_546225                      |                              |                           |                         |                        |            |                                               |                              |                           |                         |                        |                        |           |                |   |                   |  |
| <b>MFLA2118</b> |                                                                                                                  | 4.126                        | 3.162                     | 4.723                   | 0.841                  | Y ●● Y     | 7.07 E-2                                      | 22.747                       | 22.116                    | 23.466                  | 0.733                  | Y ●                    |           |                |   |                   |  |
|                 | type II secretion system protein E [Methylobacillus flagellatus KT]637939044 YP_546226                           |                              |                           |                         |                        |            |                                               |                              |                           |                         |                        |                        |           |                |   |                   |  |
| <b>MFLA2119</b> |                                                                                                                  | 8.830                        | 9.293                     | 10.080                  | -0.491                 | Y ●● Y     | 1.19 E-1                                      | 27.740                       | 28.188                    | 28.981                  | -0.643                 | Y ●                    |           |                |   |                   |  |
|                 | " acetolactate synthase, large subunit, biosynthetic type [Methylobacillus flagellatus KT]637939045 YP_546227 "" |                              |                           |                         |                        |            |                                               |                              |                           |                         |                        |                        |           |                |   |                   |  |
| <b>MFLA2120</b> | 4.53 E-11                                                                                                        | 6.832                        | 7.412                     | 8.151                   | -0.751                 | G ●● Y     | 3.17 E-2                                      | 26.181                       | 27.046                    | 27.678                  | -0.878                 | G ●                    |           |                |   |                   |  |
|                 | " acetolactate synthase, small subunit [Methylobacillus flagellatus KT]637939046 YP_546228 ""                    |                              |                           |                         |                        |            |                                               |                              |                           |                         |                        |                        |           |                |   |                   |  |
| <b>MFLA2121</b> |                                                                                                                  | 9.853                        | 10.467                    | 11.193                  | -0.847                 | Y ●● G     | 4.58 E-3                                      | 28.889                       | 29.963                    | 30.524                  | -1.083                 | G ●                    |           |                |   |                   |  |
|                 | ketol-acid reductoisomerase [Methylobacillus flagellatus KT]637939047 YP_546229                                  |                              |                           |                         |                        |            |                                               |                              |                           |                         |                        |                        |           |                |   |                   |  |
| <b>MFLA2122</b> |                                                                                                                  | 4.115                        | 5.139                     | 5.716                   | -1.114                 | Y ●● Y     | 3.09 E-2                                      | 22.418                       | 23.297                    | 23.923                  | -0.953                 | Y ●                    |           |                |   |                   |  |
|                 | Phosphatidylserine decarboxylase [Methylobacillus flagellatus KT]637939048 YP_546230                             |                              |                           |                         |                        |            |                                               |                              |                           |                         |                        |                        |           |                |   |                   |  |
| <b>MFLA2123</b> |                                                                                                                  | 3.038                        | 1.471                     | 3.457                   | 1.286                  | Y ●● Y     | 8.19 E-2                                      | 20.902                       | 21.980                    | 22.539                  | -1.391                 | Y ●                    |           |                |   |                   |  |
|                 | NUDIX hydrolase [Methylobacillus flagellatus KT]637939049 YP_546231                                              |                              |                           |                         |                        |            |                                               |                              |                           |                         |                        |                        |           |                |   |                   |  |
| <b>MFLA2124</b> | 7.38 E-2                                                                                                         | 5.060                        | 5.139                     | 6.100                   | -0.030                 | Y ●● Y     | 1.41 E-1                                      | 24.790                       | 24.428                    | 25.620                  | 0.259                  | Y ●                    |           |                |   |                   |  |
|                 | 40-residue YVTN beta-propeller repeat [Methylobacillus flagellatus KT]637939050 YP_546232                        |                              |                           |                         |                        |            |                                               |                              |                           |                         |                        |                        |           |                |   |                   |  |

| ORF             | AM/OH <i>M. Flagellatus</i> Spectral Count                                                                                          |                              |                           |                         |                        | AM/OH <i>M. Flagellatus</i> Protein Intensity |            |                              |                           |                         | Spectral Count         |           | Protein Intensity      |  |  |
|-----------------|-------------------------------------------------------------------------------------------------------------------------------------|------------------------------|---------------------------|-------------------------|------------------------|-----------------------------------------------|------------|------------------------------|---------------------------|-------------------------|------------------------|-----------|------------------------|--|--|
|                 | $q$ -value                                                                                                                          | log <sub>2</sub> Methylamine | log <sub>2</sub> Methanol | log <sub>2</sub> Sc Sum | log <sub>2</sub> Ratio | Regulation                                    | $q$ -value | log <sub>2</sub> Methylamine | log <sub>2</sub> Methanol | log <sub>2</sub> PI Sum | log <sub>2</sub> Ratio | Consensus | Log <sub>2</sub> Ratio |  |  |
| <b>MFLA2125</b> |                                                                                                                                     | 6.300                        | 5.844                     | 7.090                   | 0.430                  | Y ●● Y                                        | 1.69 E-1   | 26.285                       | 26.205                    | 27.245                  | 0.090                  | Y ●       |                        |  |  |
|                 | <i>MxaD gene product [Methylobacillus flagellatus KT]637939051 YP_546233</i>                                                        |                              |                           |                         |                        |                                               |            |                              |                           |                         |                        |           |                        |  |  |
| <b>MFLA2126</b> |                                                                                                                                     | 5.981                        | 6.239                     | 7.116                   | -0.597                 | Y ●● Y                                        | 9.25 E-2   | 26.952                       | 27.425                    | 28.208                  | -0.553                 | Y ●       |                        |  |  |
|                 | <i>methylation [Methylobacillus flagellatus KT]637939052 YP_546234</i>                                                              |                              |                           |                         |                        |                                               |            |                              |                           |                         |                        |           |                        |  |  |
| <b>MFLA2127</b> |                                                                                                                                     | 0.000                        | 0.000                     |                         |                        | ●●                                            |            | 0.000                        | 0.000                     |                         |                        | ●         |                        |  |  |
|                 | <i>hypothetical protein [Methylobacillus flagellatus KT]637939053 YP_546235</i>                                                     |                              |                           |                         |                        |                                               |            |                              |                           |                         |                        |           |                        |  |  |
| <b>MFLA2128</b> |                                                                                                                                     | 0.000                        | 0.000                     |                         |                        | ●●                                            |            | 0.000                        | 0.000                     |                         |                        | ●         |                        |  |  |
|                 | <i>beta-lactamase-like protein [Methylobacillus flagellatus KT]637939054 YP_546236</i>                                              |                              |                           |                         |                        |                                               |            |                              |                           |                         |                        |           |                        |  |  |
| <b>MFLA2129</b> |                                                                                                                                     | 3.259                        |                           | 3.259                   |                        | Y ●● Y                                        |            | 20.411                       |                           | 20.411                  |                        | Y ●       |                        |  |  |
|                 | <i>adenylate/guanylate cyclase [Methylobacillus flagellatus KT]637939055 YP_546237</i>                                              |                              |                           |                         |                        |                                               |            |                              |                           |                         |                        |           |                        |  |  |
| <b>MFLA2130</b> |                                                                                                                                     | 3.600                        | 2.585                     | 4.180                   | -0.126                 | Y ●● Y                                        | 9.14 E-2   | 23.308                       | 21.857                    | 23.758                  | 0.442                  | Y ●       |                        |  |  |
|                 | <i>Carboxylesterase [Methylobacillus flagellatus KT]637939056 YP_546238</i>                                                         |                              |                           |                         |                        |                                               |            |                              |                           |                         |                        |           |                        |  |  |
| <b>MFLA2131</b> |                                                                                                                                     | 0.000                        | 0.000                     |                         |                        | ●●                                            |            | 0.000                        | 0.000                     |                         |                        | ●         |                        |  |  |
|                 | <i>" exodeoxyribonuclease VII, small subunit [Methylobacillus flagellatus KT]637939057 YP_546239 ""</i>                             |                              |                           |                         |                        |                                               |            |                              |                           |                         |                        |           |                        |  |  |
| <b>MFLA2132</b> |                                                                                                                                     | 1.84 E-2                     | 4.347                     | 5.479                   | 6.022                  | -1.197                                        | Y ●● Y     | 1.69 E-2                     | 23.674                    | 25.412                  | 25.790                 | -1.712    | Y ●                    |  |  |
|                 | <i>Polyprenyl synthetase [Methylobacillus flagellatus KT]637939058 YP_546240</i>                                                    |                              |                           |                         |                        |                                               |            |                              |                           |                         |                        |           |                        |  |  |
| <b>MFLA2133</b> |                                                                                                                                     | 1.54 E-6                     | 5.534                     | 6.349                   | 6.999                  | -0.919                                        | G ●● Y     | 4.7 E-2                      | 24.561                    | 25.728                  | 26.260                 | -1.377    | G ●                    |  |  |
|                 | <i>deoxyxylulose-5-phosphate synthase [Methylobacillus flagellatus KT]637939059 YP_546241</i>                                       |                              |                           |                         |                        |                                               |            |                              |                           |                         |                        |           |                        |  |  |
| <b>MFLA2134</b> |                                                                                                                                     | 0                            | 6.765                     | 7.792                   | 8.368                  | -1.094                                        | G ●● Y     | 1.34 E-2                     | 26.369                    | 27.963                  | 28.376                 | -1.796    | G ●                    |  |  |
|                 | <i>protein of unknown function DUF198 [Methylobacillus flagellatus KT]637939060 YP_546242</i>                                       |                              |                           |                         |                        |                                               |            |                              |                           |                         |                        |           |                        |  |  |
| <b>MFLA2135</b> |                                                                                                                                     | 0.000                        | 0.000                     |                         |                        | ●●                                            |            | 0.000                        | 0.000                     |                         |                        | ●         |                        |  |  |
|                 | <i>" conserved hypothetical protein, predicted peptidase aspartic family [Methylobacillus flagellatus KT]637939061 YP_546243 ""</i> |                              |                           |                         |                        |                                               |            |                              |                           |                         |                        |           |                        |  |  |
| <b>MFLA2136</b> |                                                                                                                                     | 0.000                        | 0.000                     |                         |                        | ●●                                            |            | 0.000                        | 0.000                     |                         |                        | ●         |                        |  |  |
|                 | <i>major facilitator superfamily MFS_1 [Methylobacillus flagellatus KT]637939062 YP_546244</i>                                      |                              |                           |                         |                        |                                               |            |                              |                           |                         |                        |           |                        |  |  |
| <b>MFLA2137</b> |                                                                                                                                     | 6.65 E-2                     | 6.564                     | 6.652                   | 7.609                  | -0.093                                        | Y ●● Y     | 2.88 E-2                     | 24.922                    | 25.556                  | 26.274                 | -0.649    | Y ●                    |  |  |
|                 | <i>Chorismate synthase [Methylobacillus flagellatus KT]637939063 YP_546245</i>                                                      |                              |                           |                         |                        |                                               |            |                              |                           |                         |                        |           |                        |  |  |
| <b>MFLA2138</b> |                                                                                                                                     | 1.521                        | 2.095                     | 2.836                   | 0.555                  | Y ●● Y                                        | 1.34 E-1   | 20.910                       | 21.219                    | 22.073                  | 0.921                  | Y ●       |                        |  |  |
|                 | <i>" Pseudouridine synthase, Rsu [Methylobacillus flagellatus KT]637939064 YP_546246 ""</i>                                         |                              |                           |                         |                        |                                               |            |                              |                           |                         |                        |           |                        |  |  |
| <b>MFLA2139</b> |                                                                                                                                     | 4.39 E-5                     | 8.670                     | 8.328                   | 9.509                  | 0.345                                         | Y ●● Y     | 1.57 E-1                     | 26.858                    | 27.137                  | 28.005                 | -0.400    | Y ●                    |  |  |
|                 | <i>isocitrate/isopropylmalate dehydrogenase [Methylobacillus flagellatus KT]637939065 YP_546247</i>                                 |                              |                           |                         |                        |                                               |            |                              |                           |                         |                        |           |                        |  |  |
| <b>MFLA2140</b> |                                                                                                                                     | 10.894                       | 10.644                    | 11.774                  | 0.044                  | Y ●● Y                                        | 2.54 E-1   | 28.327                       | 28.400                    | 29.364                  | -0.036                 | Y ●       |                        |  |  |
|                 | <i>cold-shock DNA-binding domain protein [Methylobacillus flagellatus KT]637939066 YP_546248</i>                                    |                              |                           |                         |                        |                                               |            |                              |                           |                         |                        |           |                        |  |  |
| <b>MFLA2141</b> |                                                                                                                                     | 4.556                        | 5.143                     | 5.879                   | -0.698                 | Y ●● Y                                        | 2.06 E-1   | 23.611                       | 23.585                    | 24.598                  | 0.024                  | Y ●       |                        |  |  |
|                 | <i>type II secretion system protein E [Methylobacillus flagellatus KT]637939067 YP_546249</i>                                       |                              |                           |                         |                        |                                               |            |                              |                           |                         |                        |           |                        |  |  |
| <b>MFLA2142</b> |                                                                                                                                     | 4.066                        | 3.962                     | 5.015                   | 0.090                  | Y ●● Y                                        | 2.04 E-1   | 22.197                       | 22.451                    | 23.330                  | -0.439                 | Y ●       |                        |  |  |
|                 | <i>type II secretion system protein [Methylobacillus flagellatus KT]637939068 YP_546250</i>                                         |                              |                           |                         |                        |                                               |            |                              |                           |                         |                        |           |                        |  |  |
| <b>MFLA2143</b> |                                                                                                                                     | 3.52 E-2                     | 6.478                     | 6.698                   | 7.592                  | -0.191                                        | Y ●● Y     | 9.14 E-2                     | 26.450                    | 26.381                  | 27.416                 | 0.071     | Y ●                    |  |  |
|                 | <i>putative thiol:disulphide interchange protein [Methylobacillus flagellatus KT]637939069 YP_546251</i>                            |                              |                           |                         |                        |                                               |            |                              |                           |                         |                        |           |                        |  |  |
| <b>MFLA2144</b> |                                                                                                                                     | 2.761                        | 4.044                     | 4.540                   | -1.456                 | Y ●● Y                                        | 2.67 E-1   | 23.114                       | 23.070                    | 24.092                  | -0.224                 | Y ●       |                        |  |  |
|                 | <i>" Ubiquinone biosynthesis hydroxylase, UbiH/UbiF/VisC/COQ6 family [Methylobacillus flagellatus KT]637939070 YP_546252 ""</i>     |                              |                           |                         |                        |                                               |            |                              |                           |                         |                        |           |                        |  |  |
| <b>MFLA2145</b> |                                                                                                                                     | 4.888                        | 4.886                     | 5.887                   | 0.014                  | Y ●● Y                                        | 1.76 E-1   | 22.496                       | 22.880                    | 23.701                  | -0.734                 | Y ●       |                        |  |  |
|                 | <i>" Ubiquinone biosynthesis hydroxylase, UbiH/UbiF/VisC/COQ6 family [Methylobacillus flagellatus KT]637939071 YP_546253 ""</i>     |                              |                           |                         |                        |                                               |            |                              |                           |                         |                        |           |                        |  |  |
| <b>MFLA2146</b> |                                                                                                                                     | 3.353                        | 4.067                     | 4.754                   | -1.239                 | Y ●● Y                                        | 9.93 E-2   | 22.026                       | 23.246                    | 23.761                  | -1.337                 | Y ●       |                        |  |  |
|                 | <i>peptidase M24 [Methylobacillus flagellatus KT]637939072 YP_546254</i>                                                            |                              |                           |                         |                        |                                               |            |                              |                           |                         |                        |           |                        |  |  |

| ORF             | AM/OH <i>M. Flagellatus</i> Spectral Count                                                                  |                              |                           |                         |                        |            | AM/OH <i>M. Flagellatus</i> Protein Intensity |                              |                           |                         |                        |      | Consensus | Log <sub>2</sub> Ratio |
|-----------------|-------------------------------------------------------------------------------------------------------------|------------------------------|---------------------------|-------------------------|------------------------|------------|-----------------------------------------------|------------------------------|---------------------------|-------------------------|------------------------|------|-----------|------------------------|
|                 | q-value                                                                                                     | log <sub>2</sub> Methylamine | log <sub>2</sub> Methanol | log <sub>2</sub> Sc Sum | log <sub>2</sub> Ratio | Regulation | q-value                                       | log <sub>2</sub> Methylamine | log <sub>2</sub> Methanol | log <sub>2</sub> PI Sum | log <sub>2</sub> Ratio |      |           |                        |
| <b>MFLA2147</b> |                                                                                                             | 4.864                        | 4.979                     | 5.922                   | -0.114                 | Y ●● Y     | 1.16 E-1                                      | 23.885                       | 24.334                    | 25.127                  | -0.636                 | Y ●● |           |                        |
|                 | <i>Nucleotidyl transferase [Methylobacillus flagellatus KT]637939073 YP_546255</i>                          |                              |                           |                         |                        |            |                                               |                              |                           |                         |                        |      |           |                        |
| <b>MFLA2148</b> |                                                                                                             | 4.804                        | 4.268                     | 5.561                   | 0.436                  | Y ●● Y     | 1.98 E-1                                      | 24.007                       | 24.350                    | 25.189                  | -0.363                 | Y ●● |           |                        |
|                 | <i>aminoglycoside phosphotransferase [Methylobacillus flagellatus KT]637939074 YP_546256</i>                |                              |                           |                         |                        |            |                                               |                              |                           |                         |                        |      |           |                        |
| <b>MFLA2149</b> | 9.87 E-3                                                                                                    | 6.224                        | 6.668                     | 7.463                   | -0.434                 | Y ●● Y     | 1.01 E-1                                      | 25.191                       | 25.455                    | 26.329                  | -0.294                 | Y ●● |           |                        |
|                 | <i>Organic solvent tolerance protein [Methylobacillus flagellatus KT]637939075 YP_546257</i>                |                              |                           |                         |                        |            |                                               |                              |                           |                         |                        |      |           |                        |
| <b>MFLA2150</b> | 6.31 E-7                                                                                                    | 6.937                        | 7.547                     | 8.274                   | -0.633                 | G ●● Y     | 2.7 E-2                                       | 25.493                       | 26.274                    | 26.936                  | -0.841                 | G ●● |           |                        |
|                 | <i>PpiC-type peptidyl-prolyl cis-trans isomerase [Methylobacillus flagellatus KT]637939076 YP_546258</i>    |                              |                           |                         |                        |            |                                               |                              |                           |                         |                        |      |           |                        |
| <b>MFLA2151</b> |                                                                                                             | 2.937                        | 2.226                     | 3.625                   | 0.736                  | Y ●● Y     | 1.12 E-1                                      | 21.204                       | 21.655                    | 22.447                  | -0.424                 | Y ●● |           |                        |
|                 | <i>4-hydroxythreonine-4-phosphate dehydrogenase [Methylobacillus flagellatus KT]637939077 YP_546259</i>     |                              |                           |                         |                        |            |                                               |                              |                           |                         |                        |      |           |                        |
| <b>MFLA2152</b> |                                                                                                             | 2.106                        | 4.129                     | 4.446                   | -0.994                 | Y ●● Y     | 1.3 E-1                                       | 20.555                       | 24.580                    | 24.666                  | -2.528                 | Y ●● |           |                        |
|                 | <i>dimethyladenosine transferase [Methylobacillus flagellatus KT]637939078 YP_546260</i>                    |                              |                           |                         |                        |            |                                               |                              |                           |                         |                        |      |           |                        |
| <b>MFLA2153</b> | 1.05 E-1                                                                                                    | 7.008                        | 7.147                     | 8.079                   | -0.133                 | Y ●● Y     | 6.9 E-2                                       | 27.646                       | 27.831                    | 28.742                  | -0.188                 | Y ●● |           |                        |
|                 | <i>adenylate kinases [Methylobacillus flagellatus KT]637939079 YP_546261</i>                                |                              |                           |                         |                        |            |                                               |                              |                           |                         |                        |      |           |                        |
| <b>MFLA2154</b> |                                                                                                             | 4.461                        | 4.835                     | 5.660                   | -0.291                 | Y ●● Y     | 1.39 E-2                                      | 22.529                       | 23.775                    | 24.283                  | -1.231                 | Y ●● |           |                        |
|                 | <i>methyl-accepting chemotaxis sensory transducer [Methylobacillus flagellatus KT]637939080 YP_546262</i>   |                              |                           |                         |                        |            |                                               |                              |                           |                         |                        |      |           |                        |
| <b>MFLA2155</b> | 1.21 E-7                                                                                                    | 7.373                        | 7.926                     | 8.676                   | -0.555                 | G ●● G     | 9.92 E-3                                      | 26.314                       | 27.336                    | 27.914                  | -1.047                 | G ●● |           |                        |
|                 | <i>leucyl-tRNA synthetase [Methylobacillus flagellatus KT]637939081 YP_546263</i>                           |                              |                           |                         |                        |            |                                               |                              |                           |                         |                        |      |           |                        |
| <b>MFLA2156</b> |                                                                                                             | 3.106                        | 5.194                     | 5.499                   | -1.065                 | Y ●● Y     | 6.85 E-2                                      | 21.668                       | 24.317                    | 24.530                  | -1.627                 | Y ●● |           |                        |
|                 | <i>Rare lipoprotein B [Methylobacillus flagellatus KT]637939082 YP_546264</i>                               |                              |                           |                         |                        |            |                                               |                              |                           |                         |                        |      |           |                        |
| <b>MFLA2157</b> |                                                                                                             | 3.364                        | 2.595                     | 4.030                   | 0.786                  | Y ●● Y     | 2.28 E-1                                      | 21.565                       | 21.433                    | 22.501                  | 0.271                  | Y ●● |           |                        |
|                 | <i>" DNA polymerase III, delta subunit [Methylobacillus flagellatus KT]637939083 YP_546265 ""</i>           |                              |                           |                         |                        |            |                                               |                              |                           |                         |                        |      |           |                        |
| <b>MFLA2158</b> |                                                                                                             | 7.884                        | 8.351                     | 9.136                   | -0.558                 | Y ●● Y     | 1.04 E-1                                      | 25.922                       | 26.318                    | 27.134                  | -0.489                 | Y ●● |           |                        |
|                 | <i>gamma-glutamyl phosphate reductase [Methylobacillus flagellatus KT]637939084 YP_546266</i>               |                              |                           |                         |                        |            |                                               |                              |                           |                         |                        |      |           |                        |
| <b>MFLA2159</b> |                                                                                                             | 0.000                        | 0.000                     |                         |                        | ●●         |                                               | 0.000                        | 0.000                     |                         |                        | ●●   |           |                        |
|                 | <i>putative nicotinate-nucleotide adenyltransferase [Methylobacillus flagellatus KT]637939085 YP_546267</i> |                              |                           |                         |                        |            |                                               |                              |                           |                         |                        |      |           |                        |
| <b>MFLA2160</b> |                                                                                                             | 0.000                        | 0.000                     |                         |                        | ●●         |                                               | 0.000                        | 0.000                     |                         |                        | ●●   |           |                        |
|                 | <i>dethiobiotin synthase [Methylobacillus flagellatus KT]637939086 YP_546268</i>                            |                              |                           |                         |                        |            |                                               |                              |                           |                         |                        |      |           |                        |
| <b>MFLA2161</b> |                                                                                                             | 3.066                        | 4.479                     | 4.939                   | -1.519                 | Y ●● Y     | 1.9 E-2                                       | 20.600                       | 22.554                    | 22.885                  | -1.912                 | Y ●● |           |                        |
|                 | <i>Biotin biosynthesis protein BioC [Methylobacillus flagellatus KT]637939087 YP_546269</i>                 |                              |                           |                         |                        |            |                                               |                              |                           |                         |                        |      |           |                        |
| <b>MFLA2162</b> |                                                                                                             |                              | 3.523                     | 3.523                   |                        | Y ●● Y     |                                               |                              | 23.022                    | 23.022                  |                        | Y ●● |           |                        |
|                 | <i>bioH protein [Methylobacillus flagellatus KT]637939088 YP_546270</i>                                     |                              |                           |                         |                        |            |                                               |                              |                           |                         |                        |      |           |                        |
| <b>MFLA2163</b> |                                                                                                             | 2.328                        | 2.816                     | 3.593                   | 0.570                  | Y ●● Y     | 4.59 E-2                                      | 18.919                       | 21.848                    | 22.026                  | -1.922                 | Y ●● |           |                        |
|                 | <i>8-amino-7-oxononanoate synthase [Methylobacillus flagellatus KT]637939089 YP_546271</i>                  |                              |                           |                         |                        |            |                                               |                              |                           |                         |                        |      |           |                        |
| <b>MFLA2164</b> |                                                                                                             | 3.761                        | 4.702                     | 5.307                   | -1.078                 | Y ●● G     | 8.9 E-3                                       | 22.523                       | 23.772                    | 24.279                  | -1.269                 | G ●● |           |                        |
|                 | <i>biotin synthase [Methylobacillus flagellatus KT]637939090 YP_546272</i>                                  |                              |                           |                         |                        |            |                                               |                              |                           |                         |                        |      |           |                        |
| <b>MFLA2165</b> |                                                                                                             | 0.000                        | 0.000                     |                         |                        | ●●         |                                               | 0.000                        | 0.000                     |                         |                        | ●●   |           |                        |
|                 | <i>hypothetical protein [Methylobacillus flagellatus KT]637939091 YP_546273</i>                             |                              |                           |                         |                        |            |                                               |                              |                           |                         |                        |      |           |                        |
| <b>MFLA2166</b> |                                                                                                             | 0.000                        | 0.000                     |                         |                        | ●●         |                                               | 0.000                        | 0.000                     |                         |                        | ●●   |           |                        |
|                 | <i>putative lipoprotein [Methylobacillus flagellatus KT]637939092 YP_546274</i>                             |                              |                           |                         |                        |            |                                               |                              |                           |                         |                        |      |           |                        |
| <b>MFLA2167</b> |                                                                                                             | 0.000                        | 0.000                     |                         |                        | ●●         |                                               | 0.000                        | 0.000                     |                         |                        | ●●   |           |                        |
|                 | <i>protein of unknown function DUF81 [Methylobacillus flagellatus KT]637939093 YP_546275</i>                |                              |                           |                         |                        |            |                                               |                              |                           |                         |                        |      |           |                        |
| <b>MFLA2168</b> |                                                                                                             | 0.000                        | 0.000                     |                         |                        | ●●         |                                               | 0.000                        | 0.000                     |                         |                        | ●●   |           |                        |
|                 | <i>beta-lactamase-like protein [Methylobacillus flagellatus KT]637939094 YP_546276</i>                      |                              |                           |                         |                        |            |                                               |                              |                           |                         |                        |      |           |                        |



| ORF             | AM/OH <i>M. Flagellatus</i> Spectral Count                                                                                   |                              |                           |                         |                        |            | AM/OH <i>M. Flagellatus</i> Protein Intensity |                              |                           |                         |                        |     | Consensus | Log <sub>2</sub> Ratio |
|-----------------|------------------------------------------------------------------------------------------------------------------------------|------------------------------|---------------------------|-------------------------|------------------------|------------|-----------------------------------------------|------------------------------|---------------------------|-------------------------|------------------------|-----|-----------|------------------------|
|                 | q-value                                                                                                                      | log <sub>2</sub> Methylamine | log <sub>2</sub> Methanol | log <sub>2</sub> Sc Sum | log <sub>2</sub> Ratio | Regulation | q-value                                       | log <sub>2</sub> Methylamine | log <sub>2</sub> Methanol | log <sub>2</sub> PI Sum | log <sub>2</sub> Ratio |     |           |                        |
| <b>MFLA2169</b> |                                                                                                                              |                              | 2.816                     | 2.816                   |                        | Y ●● Y     |                                               |                              | 22.304                    | 22.304                  |                        | Y ● |           |                        |
|                 | <i>cyanate lyase [Methylobacillus flagellatus KT]637939095 YP_546277</i>                                                     |                              |                           |                         |                        |            |                                               |                              |                           |                         |                        |     |           |                        |
| <b>MFLA2170</b> |                                                                                                                              | 0.813                        |                           | 0.813                   |                        | Y ●● Y     |                                               | 18.483                       |                           | 18.483                  |                        | Y ● |           |                        |
|                 | <i>nitrate transport ATP-binding subunits C and D [Methylobacillus flagellatus KT]637939096 YP_546278</i>                    |                              |                           |                         |                        |            |                                               |                              |                           |                         |                        |     |           |                        |
| <b>MFLA2171</b> |                                                                                                                              | 0.000                        | 0.000                     |                         |                        | ■ ■        |                                               | 0.000                        | 0.000                     |                         |                        | ■   |           |                        |
|                 | <i>nitrate transport permease [Methylobacillus flagellatus KT]637939097 YP_546279</i>                                        |                              |                           |                         |                        |            |                                               |                              |                           |                         |                        |     |           |                        |
| <b>MFLA2172</b> |                                                                                                                              | 3.341                        | 3.315                     | 4.328                   | 0.021                  | Y ●● Y     | 2.74 E-1                                      | 21.463                       | 21.476                    | 22.469                  | 0.108                  | Y ● |           |                        |
|                 | <i>" putative nitrate transporter component, nrtA [Methylobacillus flagellatus KT]637939098 YP_546280 ""</i>                 |                              |                           |                         |                        |            |                                               |                              |                           |                         |                        |     |           |                        |
| <b>MFLA2173</b> |                                                                                                                              | 0.000                        | 0.000                     |                         |                        | ■ ■        |                                               | 0.000                        | 0.000                     |                         |                        | ■   |           |                        |
|                 | <i>Rubredoxin-type Fe(Cys)<sub>4</sub> protein [Methylobacillus flagellatus KT]637939099 YP_546281</i>                       |                              |                           |                         |                        |            |                                               |                              |                           |                         |                        |     |           |                        |
| <b>MFLA2174</b> |                                                                                                                              | 0.000                        | 0.000                     |                         |                        | ■ ■        |                                               | 0.000                        | 0.000                     |                         |                        | ■   |           |                        |
|                 | <i>putative acyl-CoA dehydrogenase [Methylobacillus flagellatus KT]637939100 YP_546282</i>                                   |                              |                           |                         |                        |            |                                               |                              |                           |                         |                        |     |           |                        |
| <b>MFLA2175</b> |                                                                                                                              | 0.000                        | 0.000                     |                         |                        | ■ ■        |                                               | 0.000                        | 0.000                     |                         |                        | ■   |           |                        |
|                 | <i>OsmC-like protein [Methylobacillus flagellatus KT]637939101 YP_546283</i>                                                 |                              |                           |                         |                        |            |                                               |                              |                           |                         |                        |     |           |                        |
| <b>MFLA2176</b> |                                                                                                                              | 3.294                        | 2.562                     | 3.974                   | 0.655                  | Y ●● Y     | 2.2 E-1                                       | 21.223                       | 21.074                    | 22.150                  | 0.314                  | Y ● |           |                        |
|                 | <i>" transcriptional regulator, NifA subfamily, Fis Family [Methylobacillus flagellatus KT]637939102 YP_546284 ""</i>        |                              |                           |                         |                        |            |                                               |                              |                           |                         |                        |     |           |                        |
| <b>MFLA2177</b> |                                                                                                                              | 0.000                        | 0.000                     |                         |                        | ■ ■        |                                               | 0.000                        | 0.000                     |                         |                        | ■   |           |                        |
|                 | <i>hypothetical protein [Methylobacillus flagellatus KT]637939103 YP_546285</i>                                              |                              |                           |                         |                        |            |                                               |                              |                           |                         |                        |     |           |                        |
| <b>MFLA2178</b> |                                                                                                                              | 0.000                        | 0.000                     |                         |                        | ■ ■        |                                               | 0.000                        | 0.000                     |                         |                        | ■   |           |                        |
|                 | <i>hypothetical protein [Methylobacillus flagellatus KT]637939104 YP_546286</i>                                              |                              |                           |                         |                        |            |                                               |                              |                           |                         |                        |     |           |                        |
| <b>MFLA2179</b> |                                                                                                                              | 4.762                        |                           | 4.762                   |                        | Y ●● Y     |                                               | 21.416                       |                           | 21.416                  |                        | Y ● |           |                        |
|                 | <i>hypothetical protein [Methylobacillus flagellatus KT]637939105 YP_546287</i>                                              |                              |                           |                         |                        |            |                                               |                              |                           |                         |                        |     |           |                        |
| <b>MFLA2180</b> |                                                                                                                              | 0.000                        | 0.000                     |                         |                        | ■ ■        |                                               | 0.000                        | 0.000                     |                         |                        | ■   |           |                        |
|                 | <i>hypothetical protein [Methylobacillus flagellatus KT]637939106 YP_546288</i>                                              |                              |                           |                         |                        |            |                                               |                              |                           |                         |                        |     |           |                        |
| <b>MFLA2181</b> |                                                                                                                              | 0.000                        | 0.000                     |                         |                        | ■ ■        |                                               | 0.000                        | 0.000                     |                         |                        | ■   |           |                        |
|                 | <i>hypothetical protein [Methylobacillus flagellatus KT]637939107 YP_546289</i>                                              |                              |                           |                         |                        |            |                                               |                              |                           |                         |                        |     |           |                        |
| <b>MFLA2182</b> |                                                                                                                              | 0.000                        | 0.000                     |                         |                        | ■ ■        |                                               | 0.000                        | 0.000                     |                         |                        | ■   |           |                        |
|                 | <i>" RNA methyltransferase TrmH, group 2 [Methylobacillus flagellatus KT]637939108 YP_546290 ""</i>                          |                              |                           |                         |                        |            |                                               |                              |                           |                         |                        |     |           |                        |
| <b>MFLA2183</b> | 1.67 E-2                                                                                                                     | 6.378                        | 5.916                     | 7.165                   | 0.451                  | Y ●● Y     | 2.42 E-1                                      | 25.099                       | 25.160                    | 26.130                  | -0.052                 | Y ● |           |                        |
|                 | <i>Glycerol-3-phosphate dehydrogenase (NAD(P)+) [Methylobacillus flagellatus KT]637939109 YP_546291</i>                      |                              |                           |                         |                        |            |                                               |                              |                           |                         |                        |     |           |                        |
| <b>MFLA2184</b> |                                                                                                                              | 3.430                        | 3.893                     | 4.680                   | -0.626                 | Y ●● Y     | 2.66 E-1                                      | 23.559                       | 23.610                    | 24.585                  | -0.354                 | Y ● |           |                        |
|                 | <i>protein of unknown function DUF1058 [Methylobacillus flagellatus KT]637939110 YP_546292</i>                               |                              |                           |                         |                        |            |                                               |                              |                           |                         |                        |     |           |                        |
| <b>MFLA2185</b> | 0                                                                                                                            | 7.224                        | 8.243                     | 8.821                   | -1.051                 | G ●● Y     | 8.4 E-2                                       | 28.958                       | 29.575                    | 30.299                  | -0.591                 | G ● |           |                        |
|                 | <i>protein-export protein SecB [Methylobacillus flagellatus KT]637939111 YP_546293</i>                                       |                              |                           |                         |                        |            |                                               |                              |                           |                         |                        |     |           |                        |
| <b>MFLA2186</b> |                                                                                                                              | 3.674                        | 3.404                     | 4.546                   | 0.264                  | Y ●● Y     | 5.47 E-2                                      | 21.923                       | 23.532                    | 23.941                  | -1.533                 | Y ● |           |                        |
|                 | <i>" Glutaredoxin, GrxC [Methylobacillus flagellatus KT]637939112 YP_546294 ""</i>                                           |                              |                           |                         |                        |            |                                               |                              |                           |                         |                        |     |           |                        |
| <b>MFLA2187</b> | 2.52 E-11                                                                                                                    | 6.901                        | 5.797                     | 7.452                   | 1.158                  | R ●● Y     | 1.91 E-1                                      | 24.646                       | 24.815                    | 25.733                  | -0.104                 | Y ● |           |                        |
|                 | <i>Rhodanese-like protein [Methylobacillus flagellatus KT]637939113 YP_546295</i>                                            |                              |                           |                         |                        |            |                                               |                              |                           |                         |                        |     |           |                        |
| <b>MFLA2188</b> | 3.87 E-15                                                                                                                    | 7.108                        | 7.994                     | 8.618                   | -0.889                 | G ●● Y     | 8.26 E-2                                      | 26.440                       | 26.925                    | 27.703                  | -0.585                 | G ● |           |                        |
|                 | <i>" phosphoglycerate mutase, 2,3-bisphosphoglycerate-independent [Methylobacillus flagellatus KT]637939114 YP_546296 ""</i> |                              |                           |                         |                        |            |                                               |                              |                           |                         |                        |     |           |                        |
| <b>MFLA2189</b> |                                                                                                                              | 2.674                        | 3.857                     | 4.384                   | -1.189                 | Y ●● Y     | 1.16 E-1                                      | 21.948                       | 21.625                    | 22.796                  | 0.274                  | Y ● |           |                        |
|                 | <i>peptidase M23B [Methylobacillus flagellatus KT]637939115 YP_546297</i>                                                    |                              |                           |                         |                        |            |                                               |                              |                           |                         |                        |     |           |                        |
| <b>MFLA2190</b> |                                                                                                                              | 3.081                        |                           | 3.081                   |                        | Y ●● Y     |                                               | 17.037                       |                           | 17.037                  |                        | Y ● |           |                        |
|                 | <i>protein of unknown function UPF0047 [Methylobacillus flagellatus KT]637939116 YP_546298</i>                               |                              |                           |                         |                        |            |                                               |                              |                           |                         |                        |     |           |                        |



| ORF             | AM/OH <i>M. Flagellatus</i> Spectral Count                                                                         |                              |                           |                         |                        | AM/OH <i>M. Flagellatus</i> Protein Intensity |          |                              |                           |                         | Spectral Count         |           | Protein Intensity |  | Log <sub>2</sub> Ratio |
|-----------------|--------------------------------------------------------------------------------------------------------------------|------------------------------|---------------------------|-------------------------|------------------------|-----------------------------------------------|----------|------------------------------|---------------------------|-------------------------|------------------------|-----------|-------------------|--|------------------------|
|                 | q-value                                                                                                            | log <sub>2</sub> Methylamine | log <sub>2</sub> Methanol | log <sub>2</sub> Sc Sum | log <sub>2</sub> Ratio | Regulation                                    | q-value  | log <sub>2</sub> Methylamine | log <sub>2</sub> Methanol | log <sub>2</sub> PI Sum | log <sub>2</sub> Ratio | Consensus |                   |  |                        |
| <b>MFLA2191</b> |                                                                                                                    | 3.532                        | 2.505                     | 4.108                   | 0.994                  | Y ●● Y                                        | 3.82 E-2 | 23.458                       | 21.848                    | 23.867                  | 1.546                  | Y ●       |                   |  |                        |
|                 | <i>hypothetical protein [Methylobacillus flagellatus KT]637939117 YP_546299</i>                                    |                              |                           |                         |                        |                                               |          |                              |                           |                         |                        |           |                   |  |                        |
| <b>MFLA2192</b> |                                                                                                                    | 0.000                        | 0.000                     |                         |                        | ■ ■                                           |          | 0.000                        | 0.000                     |                         |                        | ■         |                   |  |                        |
|                 | <i>hypothetical protein [Methylobacillus flagellatus KT]637939118 YP_546300</i>                                    |                              |                           |                         |                        |                                               |          |                              |                           |                         |                        |           |                   |  |                        |
| <b>MFLA2193</b> |                                                                                                                    | 1.843                        |                           | 1.843                   |                        | Y ●● Y                                        |          | 21.607                       |                           | 21.607                  |                        | Y ●       |                   |  |                        |
|                 | <i>TonB-dependent receptor [Methylobacillus flagellatus KT]637939119 YP_546301</i>                                 |                              |                           |                         |                        |                                               |          |                              |                           |                         |                        |           |                   |  |                        |
| <b>MFLA2194</b> |                                                                                                                    | 0.000                        | 0.000                     |                         |                        | ■ ■                                           |          | 0.000                        | 0.000                     |                         |                        | ■         |                   |  |                        |
|                 | <i>protein of unknown function DUF1555 [Methylobacillus flagellatus KT]637939120 YP_546302</i>                     |                              |                           |                         |                        |                                               |          |                              |                           |                         |                        |           |                   |  |                        |
| <b>MFLA2195</b> |                                                                                                                    | 0.000                        | 0.000                     |                         |                        | ■ ■                                           |          | 0.000                        | 0.000                     |                         |                        | ■         |                   |  |                        |
|                 | <i>protein of unknown function DUF1555 [Methylobacillus flagellatus KT]637939121 YP_546303</i>                     |                              |                           |                         |                        |                                               |          |                              |                           |                         |                        |           |                   |  |                        |
| <b>MFLA2196</b> |                                                                                                                    | 2.691                        |                           | 2.691                   |                        | Y ●● Y                                        |          | 19.534                       |                           | 19.534                  |                        | Y ●       |                   |  |                        |
|                 | <i>" cytochrome c, class I [Methylobacillus flagellatus KT]637939122 YP_546304 ""</i>                              |                              |                           |                         |                        |                                               |          |                              |                           |                         |                        |           |                   |  |                        |
| <b>MFLA2197</b> |                                                                                                                    | 3.03 E-2                     | 6.317                     | 6.407                   | 7.363                  | -0.088                                        | Y ●● R   | 6.19 E-3                     | 26.744                    | 25.908                  | 27.386                 | 0.835     | Y ●               |  |                        |
|                 | <i>hypothetical protein [Methylobacillus flagellatus KT]637939123 YP_546305</i>                                    |                              |                           |                         |                        |                                               |          |                              |                           |                         |                        |           |                   |  |                        |
| <b>MFLA2198</b> |                                                                                                                    | 7.21 E-10                    | 9.065                     | 8.601                   | 9.852                  | 0.464                                         | Y ●● Y   | 1.39 E-1                     | 28.743                    | 28.570                  | 29.659                 | 0.159     | Y ●               |  |                        |
|                 | <i>ATPase AAA-2 [Methylobacillus flagellatus KT]637939124 YP_546306</i>                                            |                              |                           |                         |                        |                                               |          |                              |                           |                         |                        |           |                   |  |                        |
| <b>MFLA2199</b> |                                                                                                                    | 3.025                        | 0.346                     | 3.235                   | 1.613                  | Y ●● Y                                        | 1.08 E-1 | 22.610                       | 20.898                    | 22.994                  | 0.674                  | Y ●       |                   |  |                        |
|                 | <i>hypothetical protein [Methylobacillus flagellatus KT]637939125 YP_546307</i>                                    |                              |                           |                         |                        |                                               |          |                              |                           |                         |                        |           |                   |  |                        |
| <b>MFLA2200</b> |                                                                                                                    | 0.000                        | 0.000                     |                         |                        | ■ ■                                           |          | 0.000                        | 0.000                     |                         |                        | ■         |                   |  |                        |
|                 | <i>hypothetical protein [Methylobacillus flagellatus KT]637939126 YP_546308</i>                                    |                              |                           |                         |                        |                                               |          |                              |                           |                         |                        |           |                   |  |                        |
| <b>MFLA2201</b> |                                                                                                                    | 0.000                        | 0.000                     |                         |                        | ■ ■                                           |          | 0.000                        | 0.000                     |                         |                        | ■         |                   |  |                        |
|                 | <i>periplasmic sensor signal transduction histidine kinase [Methylobacillus flagellatus KT]637939127 YP_546309</i> |                              |                           |                         |                        |                                               |          |                              |                           |                         |                        |           |                   |  |                        |
| <b>MFLA2202</b> |                                                                                                                    | 0.000                        | 0.000                     |                         |                        | ■ ■                                           |          | 0.000                        | 0.000                     |                         |                        | ■         |                   |  |                        |
|                 | <i>response regulator receiver domain protein (CheY-like) [Methylobacillus flagellatus KT]637939128 YP_546310</i>  |                              |                           |                         |                        |                                               |          |                              |                           |                         |                        |           |                   |  |                        |
| <b>MFLA2203</b> |                                                                                                                    | 0                            | 9.495                     | 10.002                  | 10.770                 | -0.522                                        | G ●● Y   | 1.01 E-2                     | 29.497                    | 29.911                  | 30.719                 | -0.413    | G ●               |  |                        |
|                 | <i>phosphoenolpyruvate synthase [Methylobacillus flagellatus KT]637939129 YP_546311</i>                            |                              |                           |                         |                        |                                               |          |                              |                           |                         |                        |           |                   |  |                        |
| <b>MFLA2204</b> |                                                                                                                    | 3.53 E-5                     | 6.240                     | 5.328                   | 6.855                  | 0.924                                         | R ●● Y   | 1.99 E-1                     | 25.080                    | 24.920                  | 26.003                 | 0.229     | R ●               |  |                        |
|                 | <i>protein of unknown function DUF299 [Methylobacillus flagellatus KT]637939130 YP_546312</i>                      |                              |                           |                         |                        |                                               |          |                              |                           |                         |                        |           |                   |  |                        |
| <b>MFLA2205</b> |                                                                                                                    | 0.000                        | 0.000                     |                         |                        | ■ ■                                           |          | 0.000                        | 0.000                     |                         |                        | ■         |                   |  |                        |
|                 | <i>DoxX [Methylobacillus flagellatus KT]637939131 YP_546313</i>                                                    |                              |                           |                         |                        |                                               |          |                              |                           |                         |                        |           |                   |  |                        |
| <b>MFLA2206</b> |                                                                                                                    | 8.074                        | 8.756                     | 9.455                   | -0.748                 | Y ●● G                                        | 6.19 E-3 | 29.230                       | 29.835                    | 30.564                  | -0.605                 | G ●       |                   |  |                        |
|                 | <i>" Alcohol dehydrogenase, zinc-binding [Methylobacillus flagellatus KT]637939132 YP_546314 ""</i>                |                              |                           |                         |                        |                                               |          |                              |                           |                         |                        |           |                   |  |                        |
| <b>MFLA2207</b> |                                                                                                                    | 0.000                        | 0.000                     |                         |                        | ■ ■                                           |          | 0.000                        | 0.000                     |                         |                        | ■         |                   |  |                        |
|                 | <i>lipoprotein signal peptidase [Methylobacillus flagellatus KT]637939133 YP_546315</i>                            |                              |                           |                         |                        |                                               |          |                              |                           |                         |                        |           |                   |  |                        |
| <b>MFLA2208</b> |                                                                                                                    | 1 E-1                        | 7.514                     | 7.591                   | 8.553                  | -0.084                                        | Y ●● Y   | 1.53 E-2                     | 26.132                    | 26.611                  | 27.391                 | -0.481    | Y ●               |  |                        |
|                 | <i>isoleucyl-tRNA synthetase [Methylobacillus flagellatus KT]637939134 YP_546316</i>                               |                              |                           |                         |                        |                                               |          |                              |                           |                         |                        |           |                   |  |                        |
| <b>MFLA2209</b> |                                                                                                                    | 2.521                        | 0.000                     | 2.752                   | 2.521                  | Y ●● Y                                        |          | 21.035                       | 22.073                    | 22.645                  | -1.037                 | Y ●       |                   |  |                        |
|                 | <i>riboflavin biosynthesis protein RibF [Methylobacillus flagellatus KT]637939135 YP_546317</i>                    |                              |                           |                         |                        |                                               |          |                              |                           |                         |                        |           |                   |  |                        |
| <b>MFLA2210</b> |                                                                                                                    | 0.000                        | 0.000                     |                         |                        | ■ ■                                           |          | 0.000                        | 0.000                     |                         |                        | ■         |                   |  |                        |
|                 | <i>integral membrane protein MviN [Methylobacillus flagellatus KT]637939136 YP_546318</i>                          |                              |                           |                         |                        |                                               |          |                              |                           |                         |                        |           |                   |  |                        |
| <b>MFLA2211</b> |                                                                                                                    | 0.000                        | 0.000                     |                         |                        | ■ ■                                           |          | 0.000                        | 0.000                     |                         |                        | ■         |                   |  |                        |
|                 | <i>ribosomal protein S20 [Methylobacillus flagellatus KT]637939137 YP_546319</i>                                   |                              |                           |                         |                        |                                               |          |                              |                           |                         |                        |           |                   |  |                        |
| <b>MFLA2212</b> |                                                                                                                    | 4.240                        |                           | 4.240                   |                        | Y ●● Y                                        |          | 22.869                       |                           | 22.869                  |                        | Y ●       |                   |  |                        |
|                 | <i>hypothetical protein [Methylobacillus flagellatus KT]637939138 YP_546320</i>                                    |                              |                           |                         |                        |                                               |          |                              |                           |                         |                        |           |                   |  |                        |

| ORF             | AM/OH <i>M. Flagellatus</i> Spectral Count                                                                                  |                              |                           |                         |                        |            | AM/OH <i>M. Flagellatus</i> Protein Intensity |                              |                           |                         |                        |        | Consensus | Log <sub>2</sub> Ratio |
|-----------------|-----------------------------------------------------------------------------------------------------------------------------|------------------------------|---------------------------|-------------------------|------------------------|------------|-----------------------------------------------|------------------------------|---------------------------|-------------------------|------------------------|--------|-----------|------------------------|
|                 | q-value                                                                                                                     | log <sub>2</sub> Methylamine | log <sub>2</sub> Methanol | log <sub>2</sub> Sc Sum | log <sub>2</sub> Ratio | Regulation | q-value                                       | log <sub>2</sub> Methylamine | log <sub>2</sub> Methanol | log <sub>2</sub> PI Sum | log <sub>2</sub> Ratio |        |           |                        |
| <b>MFLA2213</b> |                                                                                                                             | 3.552                        | 2.759                     | 4.209                   | 1.142                  | Y ●● Y     |                                               | 1.02 E-1                     | 23.793                    | 24.926                  | 25.468                 | -0.905 | Y ●●      |                        |
|                 | <i>hypothetical protein [Methylobacillus flagellatus KT]637939139 YP_546321</i>                                             |                              |                           |                         |                        |            |                                               |                              |                           |                         |                        |        |           |                        |
| <b>MFLA2214</b> | 2.35 E-2                                                                                                                    | 7.219                        | 7.428                     | 8.327                   | -0.215                 | Y ●● Y     |                                               | 1.09 E-1                     | 26.206                    | 26.592                  | 27.412                 | -0.492 | Y ●●      |                        |
|                 | <i>" phosphoribosylaminoimidazole carboxylase, ATPase subunit [Methylobacillus flagellatus KT]637939140 YP_546322 ""</i>    |                              |                           |                         |                        |            |                                               |                              |                           |                         |                        |        |           |                        |
| <b>MFLA2215</b> | 1.65 E-5                                                                                                                    | 4.547                        | 5.702                     | 6.238                   | -1.132                 | G ●● Y     |                                               | 6.87 E-2                     | 24.559                    | 25.069                  | 25.837                 | -0.507 | G ●●      |                        |
|                 | <i>" phosphoribosylaminoimidazole carboxylase, catalytic subunit [Methylobacillus flagellatus KT]637939141 YP_546323 ""</i> |                              |                           |                         |                        |            |                                               |                              |                           |                         |                        |        |           |                        |
| <b>MFLA2216</b> | 8.77 E-2                                                                                                                    | 5.050                        | 4.960                     | 6.005                   | 0.057                  | Y ●● Y     |                                               | 3.12 E-2                     | 23.263                    | 24.109                  | 24.747                 | -0.943 | Y ●●      |                        |
|                 | <i>glutamate 5-kinase [Methylobacillus flagellatus KT]637939142 YP_546324</i>                                               |                              |                           |                         |                        |            |                                               |                              |                           |                         |                        |        |           |                        |
| <b>MFLA2217</b> | 6.94 E-3                                                                                                                    | 5.619                        | 6.081                     | 6.868                   | -0.523                 | G ●● Y     |                                               | 2.42 E-1                     | 25.455                    | 25.401                  | 26.428                 | 0.011  | Y ●●      |                        |
|                 | <i>Small GTP-binding protein domain [Methylobacillus flagellatus KT]637939143 YP_546325</i>                                 |                              |                           |                         |                        |            |                                               |                              |                           |                         |                        |        |           |                        |
| <b>MFLA2218</b> | 8.81 E-17                                                                                                                   | 7.695                        | 8.474                     | 9.136                   | -0.787                 | G ●● Y     |                                               | 1.99 E-2                     | 25.803                    | 26.376                  | 27.118                 | -0.567 | G ●●      |                        |
|                 | <i>ribosomal protein L27 [Methylobacillus flagellatus KT]637939144 YP_546326</i>                                            |                              |                           |                         |                        |            |                                               |                              |                           |                         |                        |        |           |                        |
| <b>MFLA2219</b> | 0                                                                                                                           | 6.699                        | 7.905                     | 8.424                   | -1.202                 | G ●● Y     |                                               | 3.04 E-2                     | 28.097                    | 28.620                  | 29.382                 | -0.528 | G ●●      |                        |
|                 | <i>ribosomal protein L21 [Methylobacillus flagellatus KT]637939145 YP_546327</i>                                            |                              |                           |                         |                        |            |                                               |                              |                           |                         |                        |        |           |                        |
| <b>MFLA2220</b> | 1.42 E-2                                                                                                                    | 6.038                        | 5.908                     | 6.975                   | 0.059                  | Y ●● Y     |                                               | 1.61 E-1                     | 24.592                    | 24.826                  | 25.713                 | -0.208 | Y ●●      |                        |
|                 | <i>Trans-hexaprenyltransterase [Methylobacillus flagellatus KT]637939146 YP_546328</i>                                      |                              |                           |                         |                        |            |                                               |                              |                           |                         |                        |        |           |                        |
| <b>MFLA2221</b> |                                                                                                                             | 4.706                        | 3.261                     | 5.158                   | 1.105                  | Y ●● Y     |                                               | 1.59 E-1                     | 23.177                    | 22.682                  | 23.950                 | 0.202  | Y ●●      |                        |
|                 | <i>outer membrane efflux protein [Methylobacillus flagellatus KT]637939147 YP_546329</i>                                    |                              |                           |                         |                        |            |                                               |                              |                           |                         |                        |        |           |                        |
| <b>MFLA2222</b> | 1.15 E-2                                                                                                                    | 5.681                        | 5.555                     | 6.620                   | 0.124                  | Y ●● Y     |                                               | 1.71 E-1                     | 25.295                    | 24.939                  | 26.128                 | 0.245  | Y ●●      |                        |
|                 | <i>secretion protein HlyD [Methylobacillus flagellatus KT]637939148 YP_546330</i>                                           |                              |                           |                         |                        |            |                                               |                              |                           |                         |                        |        |           |                        |
| <b>MFLA2223</b> |                                                                                                                             | 4.991                        | 4.385                     | 5.720                   | 0.195                  | Y ●● Y     |                                               | 2.38 E-1                     | 22.722                    | 22.942                  | 23.836                 | -1.446 | Y ●●      |                        |
|                 | <i>ABC transporter related [Methylobacillus flagellatus KT]637939149 YP_546331</i>                                          |                              |                           |                         |                        |            |                                               |                              |                           |                         |                        |        |           |                        |
| <b>MFLA2224</b> |                                                                                                                             | 0.000                        | 0.000                     |                         |                        | ●●         |                                               | 0.000                        | 0.000                     |                         |                        |        | ●●        |                        |
|                 | <i>hypothetical protein [Methylobacillus flagellatus KT]637939150 YP_546332</i>                                             |                              |                           |                         |                        |            |                                               |                              |                           |                         |                        |        |           |                        |
| <b>MFLA2225</b> |                                                                                                                             | 0.000                        | 0.000                     |                         |                        | ●●         |                                               | 0.000                        | 0.000                     |                         |                        |        | ●●        |                        |
|                 | <i>Prepilin peptidase [Methylobacillus flagellatus KT]637939151 YP_546333</i>                                               |                              |                           |                         |                        |            |                                               |                              |                           |                         |                        |        |           |                        |
| <b>MFLA2226</b> | 6.51 E-3                                                                                                                    | 6.016                        | 6.523                     | 7.292                   | -0.513                 | G ●● Y     |                                               | 2.48 E-1                     | 26.468                    | 26.415                  | 27.442                 | -0.012 | Y ●●      |                        |
|                 | <i>Dephospho-CoA kinase [Methylobacillus flagellatus KT]637939152 YP_546334</i>                                             |                              |                           |                         |                        |            |                                               |                              |                           |                         |                        |        |           |                        |
| <b>MFLA2227</b> |                                                                                                                             | 4.011                        | 5.018                     | 5.600                   | -1.036                 | Y ●● Y     |                                               | 1.02 E-2                     | 23.336                    | 25.075                  | 25.453                 | -1.727 | Y ●●      |                        |
|                 | <i>protein of unknown function DUF1342 [Methylobacillus flagellatus KT]637939153 YP_546335</i>                              |                              |                           |                         |                        |            |                                               |                              |                           |                         |                        |        |           |                        |
| <b>MFLA2228</b> |                                                                                                                             | 0.000                        | 0.000                     |                         |                        | ●●         |                                               | 0.000                        | 0.000                     |                         |                        |        | ●●        |                        |
|                 | <i>protein of unknown function DUF329 [Methylobacillus flagellatus KT]637939154 YP_546336</i>                               |                              |                           |                         |                        |            |                                               |                              |                           |                         |                        |        |           |                        |
| <b>MFLA2229</b> |                                                                                                                             |                              | 0.931                     | 0.931                   |                        | Y ●● Y     |                                               |                              |                           | 19.602                  | 19.602                 |        | Y ●●      |                        |
|                 | <i>hypothetical protein [Methylobacillus flagellatus KT]637939155 YP_546337</i>                                             |                              |                           |                         |                        |            |                                               |                              |                           |                         |                        |        |           |                        |
| <b>MFLA2230</b> |                                                                                                                             | 2.106                        | 3.441                     | 3.922                   | -0.314                 | Y ●● Y     |                                               | 7.27 E-2                     | 20.190                    | 21.021                  | 21.665                 | 0.170  | Y ●●      |                        |
|                 | <i>mutator mutT protein [Methylobacillus flagellatus KT]637939156 YP_546338</i>                                             |                              |                           |                         |                        |            |                                               |                              |                           |                         |                        |        |           |                        |
| <b>MFLA2231</b> |                                                                                                                             | 4.352                        | 4.505                     | 5.431                   | -0.145                 | Y ●● Y     |                                               | 1.77 E-2                     | 22.491                    | 23.928                  | 24.381                 | -1.616 | Y ●●      |                        |
|                 | <i>protein of unknown function DUF815 [Methylobacillus flagellatus KT]637939157 YP_546339</i>                               |                              |                           |                         |                        |            |                                               |                              |                           |                         |                        |        |           |                        |
| <b>MFLA2232</b> | 8.65 E-7                                                                                                                    | 5.610                        | 6.507                     | 7.127                   | -0.958                 | G ●● Y     |                                               | 2.9 E-2                      | 24.244                    | 25.492                  | 25.999                 | -1.422 | G ●●      |                        |
|                 | <i>arginine biosynthesis bifunctional protein ArgJ [Methylobacillus flagellatus KT]637939158 YP_546340</i>                  |                              |                           |                         |                        |            |                                               |                              |                           |                         |                        |        |           |                        |
| <b>MFLA2233</b> |                                                                                                                             | 0.000                        | 0.000                     |                         |                        | ●●         |                                               | 0.000                        | 0.000                     |                         |                        |        | ●●        |                        |
|                 | <i>protein of unknown function DUF1289 [Methylobacillus flagellatus KT]637939159 YP_546341</i>                              |                              |                           |                         |                        |            |                                               |                              |                           |                         |                        |        |           |                        |
| <b>MFLA2234</b> | 3.19 E-3                                                                                                                    | 8.738                        | 8.935                     | 9.840                   | -0.199                 | Y ●● Y     |                                               | 9.79 E-2                     | 27.619                    | 28.083                  | 28.870                 | -0.577 | Y ●●      |                        |
|                 | <i>" preprotein translocase, SecA subunit [Methylobacillus flagellatus KT]637939160 YP_546342 ""</i>                        |                              |                           |                         |                        |            |                                               |                              |                           |                         |                        |        |           |                        |





| ORF             | AM/OH <i>M. Flagellatus</i> Spectral Count                                                                                     |                      |                   |                 |                 |            | AM/OH <i>M. Flagellatus</i> Protein Intensity |                      |                   |                 |                 |                        | Consensus | Spectral Count |   | Protein Intensity |  |
|-----------------|--------------------------------------------------------------------------------------------------------------------------------|----------------------|-------------------|-----------------|-----------------|------------|-----------------------------------------------|----------------------|-------------------|-----------------|-----------------|------------------------|-----------|----------------|---|-------------------|--|
|                 | $q$ -value                                                                                                                     | $\log_2$ Methylamine | $\log_2$ Methanol | $\log_2$ Sc Sum | $\log_2$ -Ratio | Regulation | $q$ -value                                    | $\log_2$ Methylamine | $\log_2$ Methanol | $\log_2$ PI Sum | $\log_2$ -Ratio | Log <sub>2</sub> Ratio |           | -7             | 0 | 7                 |  |
| <b>MFLA2235</b> |                                                                                                                                | 0.000                | 0.000             |                 |                 |            |                                               | 0.000                | 0.000             |                 |                 |                        |           |                |   |                   |  |
|                 | <i>peptidase M23B [Methylobacillus flagellatus KT]637939161 YP_546343</i>                                                      |                      |                   |                 |                 |            |                                               |                      |                   |                 |                 |                        |           |                |   |                   |  |
| <b>MFLA2236</b> |                                                                                                                                | 0.000                | 0.000             |                 |                 |            |                                               | 0.000                | 0.000             |                 |                 |                        |           |                |   |                   |  |
|                 | <i>hypothetical protein [Methylobacillus flagellatus KT]637939162 YP_546344</i>                                                |                      |                   |                 |                 |            |                                               |                      |                   |                 |                 |                        |           |                |   |                   |  |
| <b>MFLA2237</b> |                                                                                                                                | 0.000                | 0.000             |                 |                 |            |                                               | 0.000                | 0.000             |                 |                 |                        |           |                |   |                   |  |
|                 | <i>protein of unknown function DUF81 [Methylobacillus flagellatus KT]637939163 YP_546345</i>                                   |                      |                   |                 |                 |            |                                               |                      |                   |                 |                 |                        |           |                |   |                   |  |
| <b>MFLA2238</b> | 3.235                                                                                                                          | 1.000                | 3.513             | 1.232           | Y               | ●          | ●                                             | Y                    | 1.3 E-1           | 21.759          | 19.318          | 22.003                 | 1.228     | Y              | ● |                   |  |
|                 | <i>ABC transporter related [Methylobacillus flagellatus KT]637939164 YP_546346</i>                                             |                      |                   |                 |                 |            |                                               |                      |                   |                 |                 |                        |           |                |   |                   |  |
| <b>MFLA2239</b> |                                                                                                                                | 0.000                | 0.000             |                 |                 |            |                                               | 0.000                | 0.000             |                 |                 |                        |           |                |   |                   |  |
|                 | <i>ABC-2 [Methylobacillus flagellatus KT]637939165 YP_546347</i>                                                               |                      |                   |                 |                 |            |                                               |                      |                   |                 |                 |                        |           |                |   |                   |  |
| <b>MFLA2240</b> | 3.4 E-16                                                                                                                       | 6.761                | 7.757             | 8.343           | -1.022          | G          | ●                                             | ●                    | G                 | 5.35 E-3        | 26.102          | 27.961                 | 28.312    | -1.920         | G | ●                 |  |
|                 | <i>Inorganic diphosphatase [Methylobacillus flagellatus KT]637939166 YP_546348</i>                                             |                      |                   |                 |                 |            |                                               |                      |                   |                 |                 |                        |           |                |   |                   |  |
| <b>MFLA2241</b> |                                                                                                                                | 0.000                | 0.000             |                 |                 |            |                                               | 0.000                | 0.000             |                 |                 |                        |           |                |   |                   |  |
|                 | <i>protein of unknown function DUF1232 [Methylobacillus flagellatus KT]637939167 YP_546349</i>                                 |                      |                   |                 |                 |            |                                               |                      |                   |                 |                 |                        |           |                |   |                   |  |
| <b>MFLA2242</b> | 1.29 E-2                                                                                                                       | 6.139                | 5.614             | 6.900           | 0.539           | Y          | ●                                             | ●                    | Y                 | 1.12 E-2        | 24.947          | 25.876                 | 26.485    | -0.951         | Y | ●                 |  |
|                 | <i>phosphoribosylaminoimidazole-succinocarboxamide synthase [Methylobacillus flagellatus KT]637939168 YP_546350</i>            |                      |                   |                 |                 |            |                                               |                      |                   |                 |                 |                        |           |                |   |                   |  |
| <b>MFLA2243</b> | 4.766                                                                                                                          | 3.866                | 5.385             | 0.950           | Y               | ●          | ●                                             | Y                    | 4.84 E-2          | 23.622          | 25.765          | 26.059                 | -1.967    | Y              | ● |                   |  |
|                 | <i>" Fructose-bisphosphate aldolase, class II, Calvin cycle subtype [Methylobacillus flagellatus KT]637939169 YP_546351 ""</i> |                      |                   |                 |                 |            |                                               |                      |                   |                 |                 |                        |           |                |   |                   |  |
| <b>MFLA2244</b> | 1.49 E-2                                                                                                                       | 5.540                | 4.444             | 6.093           | 1.139           | Y          | ●                                             | ●                    | Y                 | 1.63 E-1        | 23.289          | 23.882                 | 24.616    | -0.180         | Y | ●                 |  |
|                 | <i>Pyruvate kinase [Methylobacillus flagellatus KT]637939170 YP_546352</i>                                                     |                      |                   |                 |                 |            |                                               |                      |                   |                 |                 |                        |           |                |   |                   |  |
| <b>MFLA2245</b> |                                                                                                                                | 0.000                | 0.000             |                 |                 |            |                                               | 0.000                | 0.000             |                 |                 |                        |           |                |   |                   |  |
|                 | <i>hypothetical protein [Methylobacillus flagellatus KT]637939171 YP_546353</i>                                                |                      |                   |                 |                 |            |                                               |                      |                   |                 |                 |                        |           |                |   |                   |  |
| <b>MFLA2246</b> |                                                                                                                                | 0.000                | 0.000             |                 |                 |            |                                               | 0.000                | 0.000             |                 |                 |                        |           |                |   |                   |  |
|                 | <i>hypothetical protein [Methylobacillus flagellatus KT]637939172 YP_546354</i>                                                |                      |                   |                 |                 |            |                                               |                      |                   |                 |                 |                        |           |                |   |                   |  |
| <b>MFLA2247</b> | 1.45 E-6                                                                                                                       | 6.380                | 7.098             | 7.783           | -0.716          | G          | ●                                             | ●                    | Y                 | 5.47 E-2        | 25.532          | 26.034                 | 26.805    | -0.558         | G | ●                 |  |
|                 | <i>Phosphoglycerate kinase [Methylobacillus flagellatus KT]637939173 YP_546355</i>                                             |                      |                   |                 |                 |            |                                               |                      |                   |                 |                 |                        |           |                |   |                   |  |
| <b>MFLA2248</b> | 3.1 E-2                                                                                                                        | 7.414                | 7.675             | 8.550           | -0.262          | Y          | ●                                             | ●                    | Y                 | 6.11 E-2        | 27.398          | 27.657                 | 28.533    | -0.273         | Y | ●                 |  |
|                 | <i>" glyceraldehyde-3-phosphate dehydrogenase, type I [Methylobacillus flagellatus KT]637939174 YP_546356 ""</i>               |                      |                   |                 |                 |            |                                               |                      |                   |                 |                 |                        |           |                |   |                   |  |
| <b>MFLA2249</b> | 11.651                                                                                                                         | 11.663               | 12.657            | -0.044          | Y               | ●          | ●                                             | Y                    | 5.03 E-2          | 30.795          | 31.272          | 32.053                 | -0.521    | Y              | ● |                   |  |
|                 | <i>transketolase [Methylobacillus flagellatus KT]637939175 YP_546357</i>                                                       |                      |                   |                 |                 |            |                                               |                      |                   |                 |                 |                        |           |                |   |                   |  |
| <b>MFLA2250</b> | 6.027                                                                                                                          | 5.504                | 6.789             | 0.377           | Y               | ●          | ●                                             | Y                    | 1.66 E-2          | 25.143          | 25.661          | 26.425                 | -0.513    | Y              | ● |                   |  |
|                 | <i>hypothetical protein [Methylobacillus flagellatus KT]637939176 YP_546358</i>                                                |                      |                   |                 |                 |            |                                               |                      |                   |                 |                 |                        |           |                |   |                   |  |
| <b>MFLA2251</b> | 4.211                                                                                                                          | 2.871                | 4.691             | 1.002           | Y               | ●          | ●                                             | Y                    | 6.17 E-2          | 22.684          | 22.147          | 23.441                 | 0.540     | Y              | ● |                   |  |
|                 | <i>protein of unknown function DUF558 [Methylobacillus flagellatus KT]637939177 YP_546359</i>                                  |                      |                   |                 |                 |            |                                               |                      |                   |                 |                 |                        |           |                |   |                   |  |
| <b>MFLA2252</b> | 3.945                                                                                                                          | 4.488                | 5.242             | -0.591          | Y               | ●          | ●                                             | Y                    | 5.13 E-2          | 21.430          | 22.501          | 23.062                 | -1.024    | Y              | ● |                   |  |
|                 | <i>" transcriptional regulator, XRE family [Methylobacillus flagellatus KT]637939178 YP_546360 ""</i>                          |                      |                   |                 |                 |            |                                               |                      |                   |                 |                 |                        |           |                |   |                   |  |
| <b>MFLA2253</b> |                                                                                                                                | 0.000                | 0.000             |                 |                 |            |                                               | 0.000                | 0.000             |                 |                 |                        |           |                |   |                   |  |
|                 | <i>hypothetical protein [Methylobacillus flagellatus KT]637939179 YP_546361</i>                                                |                      |                   |                 |                 |            |                                               |                      |                   |                 |                 |                        |           |                |   |                   |  |
| <b>MFLA2254</b> | 3.753                                                                                                                          | 3.830                | 4.792             | -0.050          | Y               | ●          | ●                                             | Y                    | 8.43 E-2          | 21.247          | 21.705          | 22.494                 | -0.417    | Y              | ● |                   |  |
|                 | <i>Formate--tetrahydrofolate ligase [Methylobacillus flagellatus KT]637939180 YP_546362</i>                                    |                      |                   |                 |                 |            |                                               |                      |                   |                 |                 |                        |           |                |   |                   |  |
| <b>MFLA2255</b> | 1.54 E-6                                                                                                                       | 6.943                | 7.584             | 8.298           | -0.640          | G          | ●                                             | ●                    | G                 | 1.69 E-3        | 27.125          | 27.854                 | 28.535    | -0.730         | G | ●                 |  |
|                 | <i>acetylglutamate kinase [Methylobacillus flagellatus KT]637939181 YP_546363</i>                                              |                      |                   |                 |                 |            |                                               |                      |                   |                 |                 |                        |           |                |   |                   |  |
| <b>MFLA2256</b> |                                                                                                                                | 0.000                | 0.000             |                 |                 |            |                                               | 0.000                | 0.000             |                 |                 |                        |           |                |   |                   |  |
|                 | <i>Pyrimidine 5-nucleotidase [Methylobacillus flagellatus KT]637939182 YP_546364</i>                                           |                      |                   |                 |                 |            |                                               |                      |                   |                 |                 |                        |           |                |   |                   |  |

| ORF             | AM/OH <i>M. Flagellatus</i> Spectral Count                                                                                                                     |                              |                           |                         |                        | AM/OH <i>M. Flagellatus</i> Protein Intensity |          |                              |                           |                         | Spectral Count         |           | Protein Intensity |  | Log <sub>2</sub> Ratio |
|-----------------|----------------------------------------------------------------------------------------------------------------------------------------------------------------|------------------------------|---------------------------|-------------------------|------------------------|-----------------------------------------------|----------|------------------------------|---------------------------|-------------------------|------------------------|-----------|-------------------|--|------------------------|
|                 | q-value                                                                                                                                                        | log <sub>2</sub> Methylamine | log <sub>2</sub> Methanol | log <sub>2</sub> Sc Sum | log <sub>2</sub> Ratio | Regulation                                    | q-value  | log <sub>2</sub> Methylamine | log <sub>2</sub> Methanol | log <sub>2</sub> PI Sum | log <sub>2</sub> Ratio | Consensus |                   |  |                        |
| <b>MFLA2257</b> |                                                                                                                                                                | 4.093                        | 4.895                     | 5.549                   | -0.824                 | Y ●●● Y                                       | 1.59 E-1 | 25.243                       | 25.387                    | 26.317                  | -0.175                 | Y ●●      |                   |  |                        |
|                 | "transcriptional regulator, TetR family [Methylobacillus flagellatus KT]637939183 YP_546365 ""                                                                 |                              |                           |                         |                        |                                               |          |                              |                           |                         |                        |           |                   |  |                        |
| <b>MFLA2258</b> |                                                                                                                                                                | 0.000                        | 0.000                     |                         |                        | ●●                                            |          | 0.000                        | 0.000                     |                         |                        | ●         |                   |  |                        |
|                 | hypothetical protein [Methylobacillus flagellatus KT]637939184 YP_546366                                                                                       |                              |                           |                         |                        |                                               |          |                              |                           |                         |                        |           |                   |  |                        |
| <b>MFLA2259</b> |                                                                                                                                                                |                              | 0.346                     | 0.346                   |                        | Y ●●● Y                                       |          |                              | 21.842                    | 21.842                  |                        | Y ●●      |                   |  |                        |
|                 | metal dependent phosphohydrolase [Methylobacillus flagellatus KT]637939185 YP_546367                                                                           |                              |                           |                         |                        |                                               |          |                              |                           |                         |                        |           |                   |  |                        |
| <b>MFLA2260</b> |                                                                                                                                                                | 0.000                        | 0.000                     |                         |                        | ●●                                            |          | 0.000                        | 0.000                     |                         |                        | ●         |                   |  |                        |
|                 | NAD-dependent epimerase/dehydratase [Methylobacillus flagellatus KT]637939186 YP_546368                                                                        |                              |                           |                         |                        |                                               |          |                              |                           |                         |                        |           |                   |  |                        |
| <b>MFLA2261</b> |                                                                                                                                                                | 5.448                        | 4.444                     | 6.032                   | 0.916                  | Y ●●● Y                                       | 8.8 E-2  | 23.573                       | 22.971                    | 24.304                  | 0.521                  | Y ●●      |                   |  |                        |
|                 | "Lytic transglycosylase, catalytic [Methylobacillus flagellatus KT]637939187 YP_546369 ""                                                                      |                              |                           |                         |                        |                                               |          |                              |                           |                         |                        |           |                   |  |                        |
| <b>MFLA2262</b> |                                                                                                                                                                | 1.93 E-2                     | 5.028                     | 5.286                   | 6.163                  | Y ●●● G                                       | 4.58 E-3 | 22.706                       | 24.521                    | 24.882                  | -1.864                 | G ●●      |                   |  |                        |
|                 | UDP-3-O-acyl N-acetylglucosamine deacetylase [Methylobacillus flagellatus KT]637939188 YP_546370                                                               |                              |                           |                         |                        |                                               |          |                              |                           |                         |                        |           |                   |  |                        |
| <b>MFLA2263</b> |                                                                                                                                                                | 0                            | 4.783                     | 6.981                   | 7.265                  | G ●●● G                                       | 4.58 E-3 | 24.812                       | 27.133                    | 27.396                  | -2.448                 | G ●●      |                   |  |                        |
|                 | cell division protein FtsZ [Methylobacillus flagellatus KT]637939189 YP_546371                                                                                 |                              |                           |                         |                        |                                               |          |                              |                           |                         |                        |           |                   |  |                        |
| <b>MFLA2264</b> |                                                                                                                                                                | 0                            | 6.227                     | 7.502                   | 8.001                  | G ●●● Y                                       | 3.74 E-2 | 24.886                       | 26.094                    | 26.613                  | -1.243                 | G ●●      |                   |  |                        |
|                 | cell division protein FtsA [Methylobacillus flagellatus KT]637939190 YP_546372                                                                                 |                              |                           |                         |                        |                                               |          |                              |                           |                         |                        |           |                   |  |                        |
| <b>MFLA2265</b> |                                                                                                                                                                | 0.000                        | 0.000                     |                         |                        | ●●                                            |          | 0.000                        | 0.000                     |                         |                        | ●         |                   |  |                        |
|                 | cell division protein FtsQ [Methylobacillus flagellatus KT]637939191 YP_546373                                                                                 |                              |                           |                         |                        |                                               |          |                              |                           |                         |                        |           |                   |  |                        |
| <b>MFLA2266</b> |                                                                                                                                                                | 3.38 E-3                     | 4.899                     | 5.706                   | 6.358                  | G ●●● Y                                       | 1.29 E-2 | 23.715                       | 24.979                    | 25.481                  | -1.355                 | G ●●      |                   |  |                        |
|                 | D-alanine--D-alanine ligase [Methylobacillus flagellatus KT]637939192 YP_546374                                                                                |                              |                           |                         |                        |                                               |          |                              |                           |                         |                        |           |                   |  |                        |
| <b>MFLA2267</b> |                                                                                                                                                                | 4.714                        | 3.627                     | 5.271                   | 1.084                  | Y ●●● Y                                       | 7.77 E-2 | 22.980                       | 23.237                    | 24.114                  | -0.244                 | Y ●●      |                   |  |                        |
|                 | UDP-N-acetylenolpyruvoylglucosamine reductase [Methylobacillus flagellatus KT]637939193 YP_546375                                                              |                              |                           |                         |                        |                                               |          |                              |                           |                         |                        |           |                   |  |                        |
| <b>MFLA2268</b> |                                                                                                                                                                | 4.120                        | 5.022                     | 5.640                   | -0.887                 | Y ●●● Y                                       | 1.08 E-2 | 21.517                       | 23.667                    | 23.960                  | -2.137                 | Y ●●      |                   |  |                        |
|                 | UDP-N-acetylmuramate--alanine ligase [Methylobacillus flagellatus KT]637939194 YP_546376                                                                       |                              |                           |                         |                        |                                               |          |                              |                           |                         |                        |           |                   |  |                        |
| <b>MFLA2269</b> |                                                                                                                                                                | 4.391                        | 5.130                     | 5.808                   | -0.756                 | Y ●●● Y                                       | 9.8 E-2  | 23.338                       | 23.991                    | 24.701                  | -0.915                 | Y ●●      |                   |  |                        |
|                 | UDP-N-acetylglucosamine--N-acetylmuramyl- (pentapeptide) pyrophosphoryl-undecaprenol N-acetylglucosamine transferase [Methylobacillus flagellatus KT]637939195 |                              |                           |                         |                        |                                               |          |                              |                           |                         |                        |           |                   |  |                        |
| <b>MFLA2270</b> |                                                                                                                                                                | 0.521                        | 0.000                     | 1.284                   | 0.521                  | Y ●●● Y                                       |          | 19.251                       | 19.902                    | 20.613                  | -0.651                 | Y ●●      |                   |  |                        |
|                 | cell cycle protein [Methylobacillus flagellatus KT]637939196 YP_546378                                                                                         |                              |                           |                         |                        |                                               |          |                              |                           |                         |                        |           |                   |  |                        |
| <b>MFLA2271</b> |                                                                                                                                                                | 4.93 E-5                     | 4.709                     | 5.764                   | 6.331                  | G ●●● Y                                       | 1.13 E-2 | 22.652                       | 24.240                    | 24.655                  | -1.613                 | G ●●      |                   |  |                        |
|                 | UDP-N-acetylmuramoylalanine--D-glutamate ligase [Methylobacillus flagellatus KT]637939197 YP_546379                                                            |                              |                           |                         |                        |                                               |          |                              |                           |                         |                        |           |                   |  |                        |
| <b>MFLA2272</b> |                                                                                                                                                                |                              | 0.346                     | 0.346                   |                        | Y ●●● Y                                       |          |                              | 16.861                    | 16.861                  |                        | Y ●●      |                   |  |                        |
|                 | phospho-N-acetylmuramoyl-pentapeptide- transferase [Methylobacillus flagellatus KT]637939198 YP_546380                                                         |                              |                           |                         |                        |                                               |          |                              |                           |                         |                        |           |                   |  |                        |
| <b>MFLA2273</b> |                                                                                                                                                                | 2.12 E-3                     | 5.402                     | 6.113                   | 6.801                  | G ●●● G                                       | 4.29 E-3 | 23.956                       | 25.243                    | 25.738                  | -1.291                 | G ●●      |                   |  |                        |
|                 | "UDP-N-acetylmuramoylalanyl-D-glutamyl-2, 6-diaminopimelate--D-alanyl-D-alanyl ligase [Methylobacillus flagellatus KT]637939199 YP_546381 ""                   |                              |                           |                         |                        |                                               |          |                              |                           |                         |                        |           |                   |  |                        |
| <b>MFLA2274</b> |                                                                                                                                                                | 1.843                        | 3.140                     | 3.632                   | -0.284                 | Y ●●● Y                                       | 8.56 E-2 | 21.185                       | 22.862                    | 23.255                  | -0.662                 | Y ●●      |                   |  |                        |
|                 | UDP-N-acetylmuramyl-tripeptide synthetases [Methylobacillus flagellatus KT]637939200 YP_546382                                                                 |                              |                           |                         |                        |                                               |          |                              |                           |                         |                        |           |                   |  |                        |
| <b>MFLA2275</b> |                                                                                                                                                                | 3.386                        | 2.739                     | 4.099                   | 0.625                  | Y ●●● Y                                       | 1.78 E-1 | 21.774                       | 21.264                    | 22.541                  | 0.309                  | Y ●●      |                   |  |                        |
|                 | Peptidoglycan glycosyltransferase [Methylobacillus flagellatus KT]637939201 YP_546383                                                                          |                              |                           |                         |                        |                                               |          |                              |                           |                         |                        |           |                   |  |                        |
| <b>MFLA2276</b> |                                                                                                                                                                | 0.000                        | 0.000                     |                         |                        | ●●                                            |          | 0.000                        | 0.000                     |                         |                        | ●         |                   |  |                        |
|                 | "Cell division protein, FtsL -like protein [Methylobacillus flagellatus KT]637939202 YP_546384 ""                                                              |                              |                           |                         |                        |                                               |          |                              |                           |                         |                        |           |                   |  |                        |
| <b>MFLA2277</b> |                                                                                                                                                                | 3.259                        | 3.453                     | 4.359                   | -0.175                 | Y ●●● Y                                       | 2.52 E-2 | 22.082                       | 23.181                    | 23.734                  | -1.236                 | Y ●●      |                   |  |                        |
|                 | methyltransferase [Methylobacillus flagellatus KT]637939203 YP_546385                                                                                          |                              |                           |                         |                        |                                               |          |                              |                           |                         |                        |           |                   |  |                        |
| <b>MFLA2278</b> |                                                                                                                                                                |                              | 4.548                     | 4.548                   |                        | Y ●●● Y                                       |          |                              | 24.358                    | 24.358                  |                        | Y ●●      |                   |  |                        |
|                 | protein of unknown function UPF0040 [Methylobacillus flagellatus KT]637939204 YP_546386                                                                        |                              |                           |                         |                        |                                               |          |                              |                           |                         |                        |           |                   |  |                        |

| ORF             | AM/OH <i>M. Flagellatus</i> Spectral Count                                                                           |                              |                           |                         |                        |            | AM/OH <i>M. Flagellatus</i> Protein Intensity |                              |                           |                         |                        |           | Spectral Count         |                        | Protein Intensity |  |
|-----------------|----------------------------------------------------------------------------------------------------------------------|------------------------------|---------------------------|-------------------------|------------------------|------------|-----------------------------------------------|------------------------------|---------------------------|-------------------------|------------------------|-----------|------------------------|------------------------|-------------------|--|
|                 | <i>q</i> -value                                                                                                      | log <sub>2</sub> Methylamine | log <sub>2</sub> Methanol | log <sub>2</sub> Sc Sum | log <sub>2</sub> Ratio | Regulation | <i>q</i> -value                               | log <sub>2</sub> Methylamine | log <sub>2</sub> Methanol | log <sub>2</sub> PI Sum | log <sub>2</sub> Ratio | Consensus | Log <sub>2</sub> Ratio | Log <sub>2</sub> Ratio |                   |  |
| <b>MFLA2279</b> |                                                                                                                      | 0.000                        | 0.000                     |                         |                        |            | 0.000                                         | 0.000                        |                           |                         |                        |           |                        |                        |                   |  |
|                 | <i>protein of unknown function DUF1555 [Methylobacillus flagellatus KT]637939205 YP_546387</i>                       |                              |                           |                         |                        |            |                                               |                              |                           |                         |                        |           |                        |                        |                   |  |
| <b>MFLA2280</b> | 4.614                                                                                                                | 4.471                        | 5.544                     | 0.149                   | Y                      | ●●         | Y                                             | 1.86 E-1                     | 23.881                    | 23.529                  | 24.716                 | 0.116     | Y                      | ●                      |                   |  |
|                 | <i>" dihydroorotase, homodimeric type [Methylobacillus flagellatus KT]637939206 YP_546388 ""</i>                     |                              |                           |                         |                        |            |                                               |                              |                           |                         |                        |           |                        |                        |                   |  |
| <b>MFLA2281</b> | 4.140                                                                                                                | 3.347                        | 4.797                     | 0.833                   | Y                      | ●●         | Y                                             | 2.45 E-1                     | 21.935                    | 22.076                  | 23.007                 | -0.566    | Y                      | ●                      |                   |  |
|                 | <i>Protein of unknown function UPF011 [Methylobacillus flagellatus KT]637939207 YP_546389</i>                        |                              |                           |                         |                        |            |                                               |                              |                           |                         |                        |           |                        |                        |                   |  |
| <b>MFLA2282</b> | 1.19 E-1                                                                                                             | 5.530                        | 5.771                     | 6.655                   | -0.245                 | Y          | ●●                                            | Y                            | 7.38 E-2                  | 24.094                  | 24.372                 | 25.240    | -0.277                 | Y                      | ●                 |  |
|                 | <i>Putative lipoprotein-like protein [Methylobacillus flagellatus KT]637939208 YP_546390</i>                         |                              |                           |                         |                        |            |                                               |                              |                           |                         |                        |           |                        |                        |                   |  |
| <b>MFLA2283</b> | 0.521                                                                                                                |                              | 0.521                     |                         | Y                      | ●●         | Y                                             |                              | 20.209                    |                         | 20.209                 |           | Y                      | ●                      |                   |  |
|                 | <i>protein of unknown function UPF0102 [Methylobacillus flagellatus KT]637939209 YP_546391</i>                       |                              |                           |                         |                        |            |                                               |                              |                           |                         |                        |           |                        |                        |                   |  |
| <b>MFLA2284</b> | 0.000                                                                                                                | 0.000                        |                           |                         |                        |            | 0.000                                         | 0.000                        |                           |                         |                        |           |                        |                        |                   |  |
|                 | <i>phosphoheptose isomerase [Methylobacillus flagellatus KT]637939210 YP_546392</i>                                  |                              |                           |                         |                        |            |                                               |                              |                           |                         |                        |           |                        |                        |                   |  |
| <b>MFLA2285</b> | 6.980                                                                                                                | 6.415                        | 7.725                     | 0.638                   | Y                      | ●●         | Y                                             | 4.01 E-2                     | 26.347                    | 27.320                  | 27.914                 | -0.934    | Y                      | ●                      |                   |  |
|                 | <i>transport-associated [Methylobacillus flagellatus KT]637939211 YP_546393</i>                                      |                              |                           |                         |                        |            |                                               |                              |                           |                         |                        |           |                        |                        |                   |  |
| <b>MFLA2286</b> | 4.067                                                                                                                | 2.871                        | 4.590                     | 0.912                   | Y                      | ●●         | Y                                             | 2.34 E-1                     | 24.109                    | 23.989                  | 25.050                 | 0.103     | Y                      | ●                      |                   |  |
|                 | <i>hypothetical protein [Methylobacillus flagellatus KT]637939212 YP_546394</i>                                      |                              |                           |                         |                        |            |                                               |                              |                           |                         |                        |           |                        |                        |                   |  |
| <b>MFLA2287</b> | 3.73 E-6                                                                                                             | 6.332                        | 6.996                     | 7.702                   | -0.666                 | G          | ●                                             | Y                            | 2.04 E-1                  | 25.144                  | 25.336                 | 26.243    | -0.357                 | G                      | ●                 |  |
|                 | <i>hypothetical protein [Methylobacillus flagellatus KT]637939213 YP_546395</i>                                      |                              |                           |                         |                        |            |                                               |                              |                           |                         |                        |           |                        |                        |                   |  |
| <b>MFLA2288</b> | 3.408                                                                                                                | 1.000                        | 3.657                     | 1.328                   | Y                      | ●●         | Y                                             | 1.55 E-1                     | 20.801                    | 18.543                  | 21.075                 | 0.842     | Y                      | ●                      |                   |  |
|                 | <i>diguanylate phosphodiesterase (EAL domain) [Methylobacillus flagellatus KT]637939214 YP_546396</i>                |                              |                           |                         |                        |            |                                               |                              |                           |                         |                        |           |                        |                        |                   |  |
| <b>MFLA2289</b> | 6.652                                                                                                                | 7.119                        | 7.904                     | -0.599                  | Y                      | ●●         | Y                                             | 1.66 E-2                     | 27.319                    | 28.261                  | 28.865                 | -0.931    | Y                      | ●                      |                   |  |
|                 | <i>thioredoxin [Methylobacillus flagellatus KT]637939215 YP_546397</i>                                               |                              |                           |                         |                        |            |                                               |                              |                           |                         |                        |           |                        |                        |                   |  |
| <b>MFLA2290</b> | 4.72 E-2                                                                                                             | 8.815                        | 8.937                     | 9.878                   | -0.122                 | Y          | ●●                                            | Y                            | 2.36 E-1                  | 27.139                  | 27.088                 | 28.113    | 0.070                  | Y                      | ●                 |  |
|                 | <i>transcription termination factor Rho [Methylobacillus flagellatus KT]637939216 YP_546398</i>                      |                              |                           |                         |                        |            |                                               |                              |                           |                         |                        |           |                        |                        |                   |  |
| <b>MFLA2291</b> | 0                                                                                                                    | 8.296                        | 7.446                     | 8.933                   | 0.859                  | R          | ●                                             | Y                            | 2.11 E-1                  | 26.702                  | 26.522                 | 27.615    | 0.044                  | Y                      | ●                 |  |
|                 | <i>ribosomal protein L31 [Methylobacillus flagellatus KT]637939217 YP_546399</i>                                     |                              |                           |                         |                        |            |                                               |                              |                           |                         |                        |           |                        |                        |                   |  |
| <b>MFLA2292</b> | 2.983                                                                                                                | 1.322                        | 3.380                     | 1.661                   | Y                      | ●●         | Y                                             |                              | 20.230                    | 19.656                  | 20.972                 | 0.574     | Y                      | ●                      |                   |  |
|                 | <i>" glycosyl transferase, family 39 [Methylobacillus flagellatus KT]637939218 YP_546400 ""</i>                      |                              |                           |                         |                        |            |                                               |                              |                           |                         |                        |           |                        |                        |                   |  |
| <b>MFLA2293</b> | 5.157                                                                                                                | 4.545                        | 5.883                     | 0.440                   | Y                      | ●●         | Y                                             | 1.77 E-2                     | 23.535                    | 24.135                  | 24.866                 | -0.614    | Y                      | ●                      |                   |  |
|                 | <i>" putative transcriptional regulator, ModE family [Methylobacillus flagellatus KT]637939219 YP_546401 ""</i>      |                              |                           |                         |                        |            |                                               |                              |                           |                         |                        |           |                        |                        |                   |  |
| <b>MFLA2294</b> | 0.000                                                                                                                | 0.000                        |                           |                         |                        |            | 0.000                                         | 0.000                        |                           |                         |                        |           |                        |                        |                   |  |
|                 | <i>molybdenum cofactor synthesis-like protein [Methylobacillus flagellatus KT]637939220 YP_546402</i>                |                              |                           |                         |                        |            |                                               |                              |                           |                         |                        |           |                        |                        |                   |  |
| <b>MFLA2295</b> | 0.000                                                                                                                | 0.000                        |                           |                         |                        |            | 0.000                                         | 0.000                        |                           |                         |                        |           |                        |                        |                   |  |
|                 | <i>molybdopterin-guanine dinucleotide biosynthesis protein A [Methylobacillus flagellatus KT]637939221 YP_546403</i> |                              |                           |                         |                        |            |                                               |                              |                           |                         |                        |           |                        |                        |                   |  |
| <b>MFLA2296</b> | 0.000                                                                                                                | 0.000                        |                           |                         |                        |            | 0.000                                         | 0.000                        |                           |                         |                        |           |                        |                        |                   |  |
|                 | <i>molybdopterin-guanine dinucleotide biosynthesis protein B [Methylobacillus flagellatus KT]637939222 YP_546404</i> |                              |                           |                         |                        |            |                                               |                              |                           |                         |                        |           |                        |                        |                   |  |
| <b>MFLA2297</b> | 6.11 E-2                                                                                                             | 5.101                        | 5.321                     | 6.215                   | -0.302                 | Y          | ●●                                            | Y                            | 2.02 E-1                  | 25.239                  | 24.940                 | 26.097    | 0.066                  | Y                      | ●                 |  |
|                 | <i>" MoeA-like, domain I and II [Methylobacillus flagellatus KT]637939223 YP_546405 ""</i>                           |                              |                           |                         |                        |            |                                               |                              |                           |                         |                        |           |                        |                        |                   |  |
| <b>MFLA2298</b> | 0.000                                                                                                                | 0.000                        |                           |                         |                        |            | 0.000                                         | 0.000                        |                           |                         |                        |           |                        |                        |                   |  |
|                 | <i>hypothetical protein [Methylobacillus flagellatus KT]637939224 YP_546406</i>                                      |                              |                           |                         |                        |            |                                               |                              |                           |                         |                        |           |                        |                        |                   |  |
| <b>MFLA2299</b> | 1.674                                                                                                                |                              | 1.674                     |                         | Y                      | ●●         | Y                                             |                              | 21.511                    |                         | 21.511                 |           | Y                      | ●                      |                   |  |
|                 | <i>" transcriptional regulator, GntR family [Methylobacillus flagellatus KT]637939225 YP_546407 ""</i>               |                              |                           |                         |                        |            |                                               |                              |                           |                         |                        |           |                        |                        |                   |  |
| <b>MFLA2300</b> | 1.521                                                                                                                |                              | 1.521                     |                         | Y                      | ●●         | Y                                             |                              | 20.306                    |                         | 20.306                 |           | Y                      | ●                      |                   |  |
|                 | <i>PfkB [Methylobacillus flagellatus KT]637939226 YP_546408</i>                                                      |                              |                           |                         |                        |            |                                               |                              |                           |                         |                        |           |                        |                        |                   |  |

| ORF             | AM/OH <i>M. Flagellatus</i> Spectral Count                                                                                         |                              |                           |                         |                        |            | AM/OH <i>M. Flagellatus</i> Protein Intensity |                              |                           |                         |                        |           | Spectral Count         |  | Protein Intensity |  |
|-----------------|------------------------------------------------------------------------------------------------------------------------------------|------------------------------|---------------------------|-------------------------|------------------------|------------|-----------------------------------------------|------------------------------|---------------------------|-------------------------|------------------------|-----------|------------------------|--|-------------------|--|
|                 | q-value                                                                                                                            | log <sub>2</sub> Methylamine | log <sub>2</sub> Methanol | log <sub>2</sub> Sc Sum | log <sub>2</sub> Ratio | Regulation | q-value                                       | log <sub>2</sub> Methylamine | log <sub>2</sub> Methanol | log <sub>2</sub> PI Sum | log <sub>2</sub> Ratio | Consensus | Log <sub>2</sub> Ratio |  |                   |  |
| <b>MFLA2301</b> | 0                                                                                                                                  | 6.727                        | 4.611                     | 7.026                   | 2.057                  | R ●● R     | 4.58 E-3                                      | 26.238                       | 24.066                    | 26.527                  | 2.182                  | R ●●      |                        |  |                   |  |
|                 | <i>TonB-dependent receptor [Methylobacillus flagellatus KT]637939227 YP_546409</i>                                                 |                              |                           |                         |                        |            |                                               |                              |                           |                         |                        |           |                        |  |                   |  |
| <b>MFLA2302</b> |                                                                                                                                    | 2.983                        |                           | 2.983                   |                        | Y ●● Y     |                                               | 17.144                       |                           | 17.144                  |                        | Y ●●      |                        |  |                   |  |
|                 | <i>hypothetical protein [Methylobacillus flagellatus KT]637939228 YP_546410</i>                                                    |                              |                           |                         |                        |            |                                               |                              |                           |                         |                        |           |                        |  |                   |  |
| <b>MFLA2303</b> |                                                                                                                                    | 0.000                        | 0.000                     |                         |                        | ●●         |                                               | 0.000                        | 0.000                     |                         |                        | ●●        |                        |  |                   |  |
|                 | <i>cytochrome B561 [Methylobacillus flagellatus KT]637939229 YP_546411</i>                                                         |                              |                           |                         |                        |            |                                               |                              |                           |                         |                        |           |                        |  |                   |  |
| <b>MFLA2304</b> | 0                                                                                                                                  | 7.906                        | 6.088                     | 8.266                   | 1.796                  | R ●● Y     | 6.03 E-2                                      | 26.807                       | 25.705                    | 27.359                  | 1.136                  | R ●●      |                        |  |                   |  |
|                 | <i>40-residue YVTN beta-propeller repeat [Methylobacillus flagellatus KT]637939230 YP_546412</i>                                   |                              |                           |                         |                        |            |                                               |                              |                           |                         |                        |           |                        |  |                   |  |
| <b>MFLA2305</b> |                                                                                                                                    | 2.843                        |                           | 2.843                   |                        | Y ●● Y     |                                               | 21.398                       |                           | 21.398                  |                        | Y ●●      |                        |  |                   |  |
|                 | <i>beta-lactamase-like protein [Methylobacillus flagellatus KT]637939231 YP_546413</i>                                             |                              |                           |                         |                        |            |                                               |                              |                           |                         |                        |           |                        |  |                   |  |
| <b>MFLA2306</b> |                                                                                                                                    | 0.000                        | 0.000                     |                         |                        | ●●         |                                               | 0.000                        | 0.000                     |                         |                        | ●●        |                        |  |                   |  |
|                 | <i>TonB-like protein [Methylobacillus flagellatus KT]637939232 YP_546414</i>                                                       |                              |                           |                         |                        |            |                                               |                              |                           |                         |                        |           |                        |  |                   |  |
| <b>MFLA2307</b> |                                                                                                                                    | 1.106                        |                           | 1.106                   |                        | Y ●● Y     |                                               | 20.001                       |                           | 20.001                  |                        | Y ●●      |                        |  |                   |  |
|                 | <i>periplasmic sensor signal transduction histidine kinase [Methylobacillus flagellatus KT]637939233 YP_546415</i>                 |                              |                           |                         |                        |            |                                               |                              |                           |                         |                        |           |                        |  |                   |  |
| <b>MFLA2308</b> |                                                                                                                                    | 4.451                        | 4.807                     | 5.640                   | -0.686                 | Y ●● Y     | 3.28 E-2                                      | 22.873                       | 24.834                    | 25.163                  | -2.032                 | Y ●●      |                        |  |                   |  |
|                 | <i>alkyl hydroperoxide reductase/ Thiol specific antioxidant/ Mal allergen [Methylobacillus flagellatus KT]637939234 YP_546416</i> |                              |                           |                         |                        |            |                                               |                              |                           |                         |                        |           |                        |  |                   |  |
| <b>MFLA2309</b> | 7.93 E-2                                                                                                                           | 7.524                        | 7.345                     | 8.437                   | 0.183                  | Y ●● Y     | 2.21 E-1                                      | 27.096                       | 27.114                    | 28.105                  | -0.020                 | Y ●●      |                        |  |                   |  |
|                 | <i>PhoH-like protein [Methylobacillus flagellatus KT]637939235 YP_546417</i>                                                       |                              |                           |                         |                        |            |                                               |                              |                           |                         |                        |           |                        |  |                   |  |
| <b>MFLA2310</b> |                                                                                                                                    | 0.000                        | 0.000                     |                         |                        | ●●         |                                               | 0.000                        | 0.000                     |                         |                        | ●●        |                        |  |                   |  |
|                 | <i>major facilitator superfamily MFS_1 [Methylobacillus flagellatus KT]637939236 YP_546418</i>                                     |                              |                           |                         |                        |            |                                               |                              |                           |                         |                        |           |                        |  |                   |  |
| <b>MFLA2311</b> | 0                                                                                                                                  | 7.491                        | 8.556                     | 9.120                   | -1.069                 | G ●● G     | 4.1 E-3                                       | 26.482                       | 27.989                    | 28.424                  | -1.509                 | G ●●      |                        |  |                   |  |
|                 | <i>FAD-dependent pyridine nucleotide-disulphide oxidoreductase [Methylobacillus flagellatus KT]637939237 YP_546419</i>             |                              |                           |                         |                        |            |                                               |                              |                           |                         |                        |           |                        |  |                   |  |
| <b>MFLA2312</b> |                                                                                                                                    | 4.324                        | 3.773                     | 5.075                   | 0.733                  | Y ●● Y     | 7.36 E-2                                      | 24.762                       | 23.591                    | 25.292                  | 1.350                  | Y ●●      |                        |  |                   |  |
|                 | <i>" cytochrome c, class I [Methylobacillus flagellatus KT]637939238 YP_546420 ""</i>                                              |                              |                           |                         |                        |            |                                               |                              |                           |                         |                        |           |                        |  |                   |  |
| <b>MFLA2313</b> | 6.08 E-2                                                                                                                           | 5.274                        | 4.641                     | 5.992                   | 0.639                  | Y ●● Y     | 2.7 E-1                                       | 24.204                       | 24.223                    | 25.214                  | -0.078                 | Y ●●      |                        |  |                   |  |
|                 | <i>" extracellular solute-binding protein, family 3 [Methylobacillus flagellatus KT]637939239 YP_546421 ""</i>                     |                              |                           |                         |                        |            |                                               |                              |                           |                         |                        |           |                        |  |                   |  |
| <b>MFLA2314</b> | 2.35 E-13                                                                                                                          | 5.995                        | 4.129                     | 6.345                   | 1.724                  | R ●● Y     | 4.54 E-2                                      | 25.291                       | 22.888                    | 25.541                  | 2.311                  | R ●●      |                        |  |                   |  |
|                 | <i>Pyrrolo-quinoline quinone [Methylobacillus flagellatus KT]637939240 YP_546422</i>                                               |                              |                           |                         |                        |            |                                               |                              |                           |                         |                        |           |                        |  |                   |  |
| <b>MFLA2315</b> |                                                                                                                                    | 4.126                        | 4.528                     | 5.341                   | -0.524                 | Y ●● Y     | 1.02 E-1                                      | 23.134                       | 24.003                    | 24.633                  | -1.779                 | Y ●●      |                        |  |                   |  |
|                 | <i>proline iminopeptidase [Methylobacillus flagellatus KT]637939241 YP_546423</i>                                                  |                              |                           |                         |                        |            |                                               |                              |                           |                         |                        |           |                        |  |                   |  |
| <b>MFLA2316</b> |                                                                                                                                    | 2.828                        |                           | 2.828                   |                        | Y ●● Y     |                                               | 19.273                       |                           | 19.273                  |                        | Y ●●      |                        |  |                   |  |
|                 | <i>cyclic nucleotide-binding domain (cNMP-BD) protein [Methylobacillus flagellatus KT]637939242 YP_546424</i>                      |                              |                           |                         |                        |            |                                               |                              |                           |                         |                        |           |                        |  |                   |  |
| <b>MFLA2317</b> |                                                                                                                                    | 4.576                        | 3.551                     | 5.153                   | 0.973                  | Y ●● Y     | 1.26 E-1                                      | 23.190                       | 23.256                    | 24.223                  | -0.064                 | Y ●●      |                        |  |                   |  |
|                 | <i>2OG-Fe(II) oxygenase [Methylobacillus flagellatus KT]637939243 YP_546425</i>                                                    |                              |                           |                         |                        |            |                                               |                              |                           |                         |                        |           |                        |  |                   |  |
| <b>MFLA2318</b> | 0                                                                                                                                  | 8.370                        | 5.041                     | 8.507                   | 3.417                  | R ●● Y     | 3.18 E-2                                      | 27.367                       | 23.389                    | 27.456                  | 4.057                  | R ●●      |                        |  |                   |  |
|                 | <i>TonB-dependent siderophore receptor [Methylobacillus flagellatus KT]637939244 YP_546426</i>                                     |                              |                           |                         |                        |            |                                               |                              |                           |                         |                        |           |                        |  |                   |  |
| <b>MFLA2319</b> | 1.1 E-8                                                                                                                            | 6.341                        | 7.155                     | 7.805                   | -0.861                 | G ●● G     | 3.72 E-3                                      | 25.929                       | 27.306                    | 27.776                  | -1.380                 | G ●●      |                        |  |                   |  |
|                 | <i>Rhodanese-like protein [Methylobacillus flagellatus KT]637939245 YP_546427</i>                                                  |                              |                           |                         |                        |            |                                               |                              |                           |                         |                        |           |                        |  |                   |  |
| <b>MFLA2320</b> |                                                                                                                                    | 0.000                        | 0.000                     |                         |                        | ●●         |                                               | 0.000                        | 0.000                     |                         |                        | ●●        |                        |  |                   |  |
|                 | <i>hypothetical protein [Methylobacillus flagellatus KT]637939246 YP_546428</i>                                                    |                              |                           |                         |                        |            |                                               |                              |                           |                         |                        |           |                        |  |                   |  |
| <b>MFLA2321</b> |                                                                                                                                    | 6.352                        | 6.583                     | 7.472                   | -0.348                 | Y ●● Y     | 2.02 E-1                                      | 24.442                       | 24.739                    | 25.598                  | -0.830                 | Y ●●      |                        |  |                   |  |
|                 | <i>" transcriptional regulator, LysR family [Methylobacillus flagellatus KT]637939247 YP_546429 ""</i>                             |                              |                           |                         |                        |            |                                               |                              |                           |                         |                        |           |                        |  |                   |  |
| <b>MFLA2322</b> | 1.19 E-1                                                                                                                           | 6.799                        | 6.641                     | 7.722                   | 0.155                  | Y ●● Y     | 6.48 E-2                                      | 26.411                       | 26.958                    | 27.710                  | -0.625                 | Y ●●      |                        |  |                   |  |
|                 | <i>sigma 70 (RpoD) [Methylobacillus flagellatus KT]637939249 YP_546430</i>                                                         |                              |                           |                         |                        |            |                                               |                              |                           |                         |                        |           |                        |  |                   |  |

| ORF             | AM/OH <i>M. Flagellatus</i> Spectral Count                                                                           |                              |                           |                         |                        | AM/OH <i>M. Flagellatus</i> Protein Intensity |          |                              |                           |                         | Spectral Count         |           | Protein Intensity |  | Log <sub>2</sub> Ratio |
|-----------------|----------------------------------------------------------------------------------------------------------------------|------------------------------|---------------------------|-------------------------|------------------------|-----------------------------------------------|----------|------------------------------|---------------------------|-------------------------|------------------------|-----------|-------------------|--|------------------------|
|                 | q-value                                                                                                              | log <sub>2</sub> Methylamine | log <sub>2</sub> Methanol | log <sub>2</sub> Sc Sum | log <sub>2</sub> Ratio | Regulation                                    | q-value  | log <sub>2</sub> Methylamine | log <sub>2</sub> Methanol | log <sub>2</sub> PI Sum | log <sub>2</sub> Ratio | Consensus |                   |  |                        |
| <b>MFLA2323</b> | 1.13 E-1                                                                                                             | 5.120                        | 4.991                     | 6.057                   | 0.207                  | Y ●● Y                                        | 2.19 E-1 | 22.634                       | 22.826                    | 23.734                  | -0.363                 | Y ●       |                   |  |                        |
|                 | <i>DNA primase [Methylobacillus flagellatus KT]637939250 YP_546431</i>                                               |                              |                           |                         |                        |                                               |          |                              |                           |                         |                        |           |                   |  |                        |
| <b>MFLA2324</b> |                                                                                                                      | 6.708                        | 6.712                     | 7.710                   | -0.092                 | Y ●● Y                                        | 1.5 E-1  | 25.289                       | 25.541                    | 26.421                  | -0.303                 | Y ●       |                   |  |                        |
|                 | <i>GatB/Yqey [Methylobacillus flagellatus KT]637939251 YP_546432</i>                                                 |                              |                           |                         |                        |                                               |          |                              |                           |                         |                        |           |                   |  |                        |
| <b>MFLA2325</b> |                                                                                                                      | 4.741                        | 4.079                     | 5.447                   | 0.618                  | Y ●● Y                                        | 8.7 E-2  | 25.763                       | 25.487                    | 26.632                  | 0.306                  | Y ●       |                   |  |                        |
|                 | <i>ribosomal protein S21 [Methylobacillus flagellatus KT]637939252 YP_546433</i>                                     |                              |                           |                         |                        |                                               |          |                              |                           |                         |                        |           |                   |  |                        |
| <b>MFLA2326</b> |                                                                                                                      | 4.796                        | 4.098                     | 5.489                   | 0.624                  | Y ●● Y                                        | 5.97 E-2 | 23.367                       | 22.878                    | 24.143                  | 0.484                  | Y ●       |                   |  |                        |
|                 | <i>" metalloendopeptidase, putative, glycoprotease family [Methylobacillus flagellatus KT]637939253 YP_546434 ""</i> |                              |                           |                         |                        |                                               |          |                              |                           |                         |                        |           |                   |  |                        |
| <b>MFLA2327</b> |                                                                                                                      | 0.000                        | 0.000                     |                         |                        | ■ ■                                           |          | 0.000                        | 0.000                     |                         |                        | ■         |                   |  |                        |
|                 | <i>protein of unknown function DUF205 [Methylobacillus flagellatus KT]637939254 YP_546435</i>                        |                              |                           |                         |                        |                                               |          |                              |                           |                         |                        |           |                   |  |                        |
| <b>MFLA2328</b> |                                                                                                                      |                              | 0.585                     | 0.585                   |                        | Y ●● Y                                        |          |                              | 20.782                    | 20.782                  |                        | Y ●       |                   |  |                        |
|                 | <i>dihydroneopterin aldolase [Methylobacillus flagellatus KT]637939255 YP_546436</i>                                 |                              |                           |                         |                        |                                               |          |                              |                           |                         |                        |           |                   |  |                        |
| <b>MFLA2329</b> |                                                                                                                      | 0.521                        |                           | 0.521                   |                        | Y ●● Y                                        |          | 19.527                       |                           | 19.527                  |                        | Y ●       |                   |  |                        |
|                 | <i>Tyrosine recombinase XerD [Methylobacillus flagellatus KT]637939256 YP_546437</i>                                 |                              |                           |                         |                        |                                               |          |                              |                           |                         |                        |           |                   |  |                        |
| <b>MFLA2330</b> |                                                                                                                      | 2.813                        | 3.476                     | 4.182                   | 0.444                  | Y ●● Y                                        | 1.37 E-1 | 19.438                       | 21.661                    | 21.941                  | -1.008                 | Y ●       |                   |  |                        |
|                 | <i>methylated-DNA--protein-cysteine methyltransferase [Methylobacillus flagellatus KT]637939257 YP_546438</i>        |                              |                           |                         |                        |                                               |          |                              |                           |                         |                        |           |                   |  |                        |
| <b>MFLA2331</b> |                                                                                                                      | 8.141                        | 8.296                     | 9.221                   | -0.196                 | Y ●● Y                                        | 2.28 E-1 | 27.783                       | 27.880                    | 28.832                  | -0.179                 | Y ●       |                   |  |                        |
|                 | <i>ribosomal protein L19 [Methylobacillus flagellatus KT]637939258 YP_546439</i>                                     |                              |                           |                         |                        |                                               |          |                              |                           |                         |                        |           |                   |  |                        |
| <b>MFLA2332</b> |                                                                                                                      | 3.851                        | 3.435                     | 4.658                   | 0.362                  | Y ●● Y                                        | 2.02 E-1 | 22.587                       | 22.312                    | 23.456                  | 0.236                  | Y ●       |                   |  |                        |
|                 | <i>tRNA (guanine-N1)-methyltransferase [Methylobacillus flagellatus KT]637939259 YP_546440</i>                       |                              |                           |                         |                        |                                               |          |                              |                           |                         |                        |           |                   |  |                        |
| <b>MFLA2333</b> |                                                                                                                      | 3.610                        | 4.173                     | 4.919                   | -0.626                 | Y ●● Y                                        | 8.15 E-2 | 23.147                       | 23.408                    | 24.283                  | -0.245                 | Y ●       |                   |  |                        |
|                 | <i>16S rRNA processing protein Rimm [Methylobacillus flagellatus KT]637939260 YP_546441</i>                          |                              |                           |                         |                        |                                               |          |                              |                           |                         |                        |           |                   |  |                        |
| <b>MFLA2334</b> | 2.94 E-12                                                                                                            | 5.298                        | 6.539                     | 7.048                   | -1.087                 | G ●● Y                                        | 1.08 E-1 | 27.466                       | 27.845                    | 28.668                  | -0.479                 | G ●       |                   |  |                        |
|                 | <i>ribosomal protein S16 [Methylobacillus flagellatus KT]637939261 YP_546442</i>                                     |                              |                           |                         |                        |                                               |          |                              |                           |                         |                        |           |                   |  |                        |
| <b>MFLA2335</b> |                                                                                                                      | 2.621                        | 2.000                     | 3.343                   | 0.621                  | Y ●● Y                                        |          | 21.037                       | 21.827                    | 22.485                  | -0.789                 | Y ●       |                   |  |                        |
|                 | <i>ExsB [Methylobacillus flagellatus KT]637939262 YP_546443</i>                                                      |                              |                           |                         |                        |                                               |          |                              |                           |                         |                        |           |                   |  |                        |
| <b>MFLA2336</b> |                                                                                                                      | 4.342                        | 4.795                     | 5.586                   | -0.836                 | Y ●● Y                                        | 1.9 E-1  | 23.570                       | 23.806                    | 24.693                  | -0.209                 | Y ●       |                   |  |                        |
|                 | <i>Radical SAM [Methylobacillus flagellatus KT]637939263 YP_546444</i>                                               |                              |                           |                         |                        |                                               |          |                              |                           |                         |                        |           |                   |  |                        |
| <b>MFLA2337</b> | 2.74 E-6                                                                                                             | 7.375                        | 7.924                     | 8.675                   | -0.549                 | G ●● Y                                        | 1.23 E-1 | 27.455                       | 27.780                    | 28.627                  | -0.291                 | G ●       |                   |  |                        |
|                 | <i>Tetratricopeptide region [Methylobacillus flagellatus KT]637939264 YP_546445</i>                                  |                              |                           |                         |                        |                                               |          |                              |                           |                         |                        |           |                   |  |                        |
| <b>MFLA2338</b> | 0                                                                                                                    | 10.317                       | 11.276                    | 11.875                  | -1.075                 | G ●● Y                                        | 1.38 E-2 | 29.643                       | 31.015                    | 31.487                  | -1.491                 | G ●       |                   |  |                        |
|                 | <i>OmpA/MotB [Methylobacillus flagellatus KT]637939265 YP_546446</i>                                                 |                              |                           |                         |                        |                                               |          |                              |                           |                         |                        |           |                   |  |                        |
| <b>MFLA2339</b> | 9.29 E-5                                                                                                             | 7.371                        | 6.842                     | 8.131                   | 0.537                  | R ●● G                                        | 4.85 E-3 | 26.636                       | 27.231                    | 27.964                  | -0.594                 | Y ●       |                   |  |                        |
|                 | <i>ToIB-like protein [Methylobacillus flagellatus KT]637939266 YP_546447</i>                                         |                              |                           |                         |                        |                                               |          |                              |                           |                         |                        |           |                   |  |                        |
| <b>MFLA2340</b> |                                                                                                                      | 3.844                        | 3.385                     | 4.633                   | 0.468                  | Y ●● Y                                        | 1.74 E-1 | 22.904                       | 23.214                    | 24.067                  | -0.400                 | Y ●       |                   |  |                        |
|                 | <i>hypothetical protein [Methylobacillus flagellatus KT]637939267 YP_546448</i>                                      |                              |                           |                         |                        |                                               |          |                              |                           |                         |                        |           |                   |  |                        |
| <b>MFLA2341</b> |                                                                                                                      |                              | 1.807                     | 1.807                   |                        | Y ●● Y                                        |          |                              | 21.856                    | 21.856                  |                        | Y ●       |                   |  |                        |
|                 | <i>Biopolymer transport protein ExbD/ToIR [Methylobacillus flagellatus KT]637939268 YP_546449</i>                    |                              |                           |                         |                        |                                               |          |                              |                           |                         |                        |           |                   |  |                        |
| <b>MFLA2342</b> |                                                                                                                      | 5.925                        | 5.883                     | 6.904                   | -0.078                 | Y ●● Y                                        | 1.06 E-2 | 24.931                       | 25.671                    | 26.348                  | -0.753                 | Y ●       |                   |  |                        |
|                 | <i>MotA/ToIQ/ExbB proton channel [Methylobacillus flagellatus KT]637939269 YP_546450</i>                             |                              |                           |                         |                        |                                               |          |                              |                           |                         |                        |           |                   |  |                        |
| <b>MFLA2343</b> |                                                                                                                      |                              | 0.000                     | 0.000                   |                        | Y ●● Y                                        |          |                              | 20.099                    | 20.099                  |                        | Y ●       |                   |  |                        |
|                 | <i>4-hydroxybenzoyl-CoA thioesterase [Methylobacillus flagellatus KT]637939270 YP_546451</i>                         |                              |                           |                         |                        |                                               |          |                              |                           |                         |                        |           |                   |  |                        |
| <b>MFLA2344</b> |                                                                                                                      | 4.439                        | 4.697                     | 5.574                   | -0.274                 | Y ●● Y                                        | 1.33 E-1 | 22.612                       | 23.294                    | 23.993                  | -0.924                 | Y ●       |                   |  |                        |
|                 | <i>Holliday junction DNA helicase RuvB [Methylobacillus flagellatus KT]637939271 YP_546452</i>                       |                              |                           |                         |                        |                                               |          |                              |                           |                         |                        |           |                   |  |                        |

| ORF             | AM/OH <i>M. Flagellatus</i> Spectral Count                                                                                        |                              |                           |                         |                        | AM/OH <i>M. Flagellatus</i> Protein Intensity |          |                              |                           |                         | Spectral Count         |           | Protein Intensity |  | Log <sub>2</sub> Ratio |
|-----------------|-----------------------------------------------------------------------------------------------------------------------------------|------------------------------|---------------------------|-------------------------|------------------------|-----------------------------------------------|----------|------------------------------|---------------------------|-------------------------|------------------------|-----------|-------------------|--|------------------------|
|                 | q-value                                                                                                                           | log <sub>2</sub> Methylamine | log <sub>2</sub> Methanol | log <sub>2</sub> Sc Sum | log <sub>2</sub> Ratio | Regulation                                    | q-value  | log <sub>2</sub> Methylamine | log <sub>2</sub> Methanol | log <sub>2</sub> PI Sum | log <sub>2</sub> Ratio | Consensus |                   |  |                        |
| <b>MFLA2345</b> |                                                                                                                                   | 4.970                        | 4.462                     | 5.738                   | 0.440                  | Y ●● Y                                        | 1.71 E-1 | 23.508                       | 23.233                    | 24.377                  | 0.160                  | Y ●       |                   |  |                        |
|                 | <i>aldo/keto reductase [Methylobacillus flagellatus KT]637939272 YP_546453</i>                                                    |                              |                           |                         |                        |                                               |          |                              |                           |                         |                        |           |                   |  |                        |
| <b>MFLA2346</b> |                                                                                                                                   | 0.000                        | 0.000                     |                         |                        | ■ ■                                           |          | 0.000                        | 0.000                     |                         |                        | ■         |                   |  |                        |
|                 | <i>" transcriptional regulator, LacI family [Methylobacillus flagellatus KT]637939273 YP_546454 ""</i>                            |                              |                           |                         |                        |                                               |          |                              |                           |                         |                        |           |                   |  |                        |
| <b>MFLA2347</b> |                                                                                                                                   | 0.000                        | 0.000                     |                         |                        | ■ ■                                           |          | 0.000                        | 0.000                     |                         |                        | ■         |                   |  |                        |
|                 | <i>ABC transporter related [Methylobacillus flagellatus KT]637939274 YP_546455</i>                                                |                              |                           |                         |                        |                                               |          |                              |                           |                         |                        |           |                   |  |                        |
| <b>MFLA2348</b> |                                                                                                                                   | 0.000                        | 0.000                     |                         |                        | ■ ■                                           |          | 0.000                        | 0.000                     |                         |                        | ■         |                   |  |                        |
|                 | <i>" extracellular solute-binding protein, family 1 [Methylobacillus flagellatus KT]637939275 YP_546456 ""</i>                    |                              |                           |                         |                        |                                               |          |                              |                           |                         |                        |           |                   |  |                        |
| <b>MFLA2349</b> |                                                                                                                                   | 0.000                        | 0.000                     |                         |                        | ■ ■                                           |          | 0.000                        | 0.000                     |                         |                        | ■         |                   |  |                        |
|                 | <i>binding-protein-dependent transport systems inner membrane component [Methylobacillus flagellatus KT]637939276 YP_546457</i>   |                              |                           |                         |                        |                                               |          |                              |                           |                         |                        |           |                   |  |                        |
| <b>MFLA2350</b> |                                                                                                                                   | 0.000                        | 0.000                     |                         |                        | ■ ■                                           |          | 0.000                        | 0.000                     |                         |                        | ■         |                   |  |                        |
|                 | <i>binding-protein-dependent transport systems inner membrane component [Methylobacillus flagellatus KT]637939277 YP_546458</i>   |                              |                           |                         |                        |                                               |          |                              |                           |                         |                        |           |                   |  |                        |
| <b>MFLA2351</b> |                                                                                                                                   | 0.000                        | 0.000                     |                         |                        | ■ ■                                           |          | 0.000                        | 0.000                     |                         |                        | ■         |                   |  |                        |
|                 | <i>TonB-dependent receptor [Methylobacillus flagellatus KT]637939278 YP_546459</i>                                                |                              |                           |                         |                        |                                               |          |                              |                           |                         |                        |           |                   |  |                        |
| <b>MFLA2352</b> |                                                                                                                                   | 0.000                        | 0.000                     |                         |                        | ■ ■                                           |          | 0.000                        | 0.000                     |                         |                        | ■         |                   |  |                        |
|                 | <i>" nitrotriacetate monooxygenase, A subunit, putative [Methylobacillus flagellatus KT]637939279 YP_546460 ""</i>                |                              |                           |                         |                        |                                               |          |                              |                           |                         |                        |           |                   |  |                        |
| <b>MFLA2353</b> |                                                                                                                                   | 0.813                        | 3.579                     | 3.777                   | -1.717                 | Y ●● Y                                        | 3.86 E-2 | 19.029                       | 23.142                    | 23.223                  | -3.107                 | Y ●       |                   |  |                        |
|                 | <i>Holliday junction DNA helicase RuvA [Methylobacillus flagellatus KT]637939280 YP_546461</i>                                    |                              |                           |                         |                        |                                               |          |                              |                           |                         |                        |           |                   |  |                        |
| <b>MFLA2354</b> |                                                                                                                                   |                              | 1.769                     | 1.769                   |                        | Y ●● Y                                        |          |                              | 20.490                    | 20.490                  |                        | Y ●       |                   |  |                        |
|                 | <i>crossover junction endodeoxyribonuclease RuvC [Methylobacillus flagellatus KT]637939281 YP_546462</i>                          |                              |                           |                         |                        |                                               |          |                              |                           |                         |                        |           |                   |  |                        |
| <b>MFLA2355</b> |                                                                                                                                   | 9.68 E-6                     | 5.364                     | 6.146                   | 6.807                  | G ●● Y                                        | 1.17 E-2 | 24.209                       | 25.712                    | 26.148                  | -1.499                 | G ●       |                   |  |                        |
|                 | <i>protein of unknown function DUF28 [Methylobacillus flagellatus KT]637939282 YP_546463</i>                                      |                              |                           |                         |                        |                                               |          |                              |                           |                         |                        |           |                   |  |                        |
| <b>MFLA2356</b> |                                                                                                                                   | 0.000                        | 0.000                     |                         |                        | ■ ■                                           |          | 0.000                        | 0.000                     |                         |                        | ■         |                   |  |                        |
|                 | <i>" protein of unknown function DUF6, transmembrane [Methylobacillus flagellatus KT]637939283 YP_546464 ""</i>                   |                              |                           |                         |                        |                                               |          |                              |                           |                         |                        |           |                   |  |                        |
| <b>MFLA2357</b> |                                                                                                                                   | 7.419                        | 6.880                     | 8.174                   | 0.528                  | Y ●● Y                                        | 6.58 E-3 | 26.876                       | 26.544                    | 27.719                  | 0.332                  | Y ●       |                   |  |                        |
|                 | <i>conserved hypothetical signal peptide protein [Methylobacillus flagellatus KT]637939284 YP_546465</i>                          |                              |                           |                         |                        |                                               |          |                              |                           |                         |                        |           |                   |  |                        |
| <b>MFLA2358</b> |                                                                                                                                   | 0                            | 6.881                     | 4.980                   | 7.223                  | R ●● Y                                        | 2.05 E-2 | 26.138                       | 24.351                    | 26.505                  | 1.750                  | R ●       |                   |  |                        |
|                 | <i>conserved hypothetical signal peptide protein [Methylobacillus flagellatus KT]637939285 YP_546466</i>                          |                              |                           |                         |                        |                                               |          |                              |                           |                         |                        |           |                   |  |                        |
| <b>MFLA2359</b> |                                                                                                                                   | 0.000                        | 0.000                     |                         |                        | ■ ■                                           |          | 0.000                        | 0.000                     |                         |                        | ■         |                   |  |                        |
|                 | <i>" transcriptional regulator, MarR family [Methylobacillus flagellatus KT]637939286 YP_546467 ""</i>                            |                              |                           |                         |                        |                                               |          |                              |                           |                         |                        |           |                   |  |                        |
| <b>MFLA2360</b> |                                                                                                                                   | 3.860                        | 2.991                     | 4.490                   | 0.847                  | Y ●● Y                                        | 1.96 E-1 | 23.341                       | 23.210                    | 24.277                  | 0.171                  | Y ●       |                   |  |                        |
|                 | <i>putative signal-transduction protein with CBS domains [Methylobacillus flagellatus KT]637939287 YP_546468</i>                  |                              |                           |                         |                        |                                               |          |                              |                           |                         |                        |           |                   |  |                        |
| <b>MFLA2361</b> |                                                                                                                                   | 0.000                        | 0.000                     |                         |                        | ■ ■                                           |          | 0.000                        | 0.000                     |                         |                        | ■         |                   |  |                        |
|                 | <i>Potassium efflux system protein [Methylobacillus flagellatus KT]637939288 YP_546469</i>                                        |                              |                           |                         |                        |                                               |          |                              |                           |                         |                        |           |                   |  |                        |
| <b>MFLA2362</b> |                                                                                                                                   | 0.000                        | 0.000                     |                         |                        | ■ ■                                           |          | 0.000                        | 0.000                     |                         |                        | ■         |                   |  |                        |
|                 | <i>NAD(P)H dehydrogenase (quinone) [Methylobacillus flagellatus KT]637939289 YP_546470</i>                                        |                              |                           |                         |                        |                                               |          |                              |                           |                         |                        |           |                   |  |                        |
| <b>MFLA2363</b> |                                                                                                                                   | 1.843                        | 1.769                     | 2.806                   | 1.084                  | Y ●● Y                                        | 1.98 E-1 | 21.770                       | 22.605                    | 23.247                  | 0.208                  | Y ●       |                   |  |                        |
|                 | <i>protein of unknown function UPF0047 [Methylobacillus flagellatus KT]637939290 YP_546471</i>                                    |                              |                           |                         |                        |                                               |          |                              |                           |                         |                        |           |                   |  |                        |
| <b>MFLA2364</b> |                                                                                                                                   | 7.352                        | 7.290                     | 8.321                   | -0.028                 | Y ●● Y                                        | 2.41 E-1 | 26.734                       | 26.809                    | 27.772                  | -0.117                 | Y ●       |                   |  |                        |
|                 | <i>conserved hypothetical protein-putative formaldehyde-activating enzyme [Methylobacillus flagellatus KT]637939291 YP_546472</i> |                              |                           |                         |                        |                                               |          |                              |                           |                         |                        |           |                   |  |                        |
| <b>MFLA2365</b> |                                                                                                                                   | 2.691                        |                           | 2.691                   |                        | Y ●● Y                                        |          | 19.916                       |                           | 19.916                  |                        | Y ●       |                   |  |                        |
|                 | <i>protein of unknown function DUF140 [Methylobacillus flagellatus KT]637939292 YP_546473</i>                                     |                              |                           |                         |                        |                                               |          |                              |                           |                         |                        |           |                   |  |                        |
| <b>MFLA2366</b> |                                                                                                                                   | 3.159                        | 2.573                     | 3.895                   | 0.459                  | Y ●● Y                                        | 1.1 E-1  | 21.230                       | 19.914                    | 21.717                  | 0.978                  | Y ●       |                   |  |                        |
|                 | <i>ABC transporter related [Methylobacillus flagellatus KT]637939293 YP_546474</i>                                                |                              |                           |                         |                        |                                               |          |                              |                           |                         |                        |           |                   |  |                        |

| ORF             | AM/OH <i>M. Flagellatus</i> Spectral Count                                                                                      |                      |                   |                 |                |            | AM/OH <i>M. Flagellatus</i> Protein Intensity |                      |                   |                 |                |                        | Consensus | Spectral Count |   | Protein Intensity |  |  |
|-----------------|---------------------------------------------------------------------------------------------------------------------------------|----------------------|-------------------|-----------------|----------------|------------|-----------------------------------------------|----------------------|-------------------|-----------------|----------------|------------------------|-----------|----------------|---|-------------------|--|--|
|                 | $q$ -value                                                                                                                      | $\log_2$ Methylamine | $\log_2$ Methanol | $\log_2$ Sc Sum | $\log_2$ Ratio | Regulation | $q$ -value                                    | $\log_2$ Methylamine | $\log_2$ Methanol | $\log_2$ PI Sum | $\log_2$ Ratio | Log <sub>2</sub> Ratio |           | -7             | 0 | 7                 |  |  |
| <b>MFLA2367</b> |                                                                                                                                 | 0.000                | 0.000             |                 |                |            |                                               | 0.000                | 0.000             |                 |                |                        |           |                |   |                   |  |  |
|                 | <i>hypothetical protein [Methylobacillus flagellatus KT]637939294 YP_546475</i>                                                 |                      |                   |                 |                |            |                                               |                      |                   |                 |                |                        |           |                |   |                   |  |  |
| <b>MFLA2368</b> | 6.08 E-12                                                                                                                       | 6.515                | 5.136             | 6.984           | 1.299          | R          | ●                                             | ●                    | Y                 | 1.06 E-1        | 25.522         | 24.957                 | 26.267    | 0.488          | R | ●                 |  |  |
|                 | <i>Mammalian cell entry related [Methylobacillus flagellatus KT]637939295 YP_546476</i>                                         |                      |                   |                 |                |            |                                               |                      |                   |                 |                |                        |           |                |   |                   |  |  |
| <b>MFLA2369</b> | 4.28 E-6                                                                                                                        | 5.603                | 4.573             | 6.178           | 0.903          | R          | ●                                             | ●                    | Y                 | 5.38 E-2        | 24.815         | 24.485                 | 25.660    | 0.318          | R | ●                 |  |  |
|                 | <i>putative lipoprotein [Methylobacillus flagellatus KT]637939296 YP_546477</i>                                                 |                      |                   |                 |                |            |                                               |                      |                   |                 |                |                        |           |                |   |                   |  |  |
| <b>MFLA2370</b> |                                                                                                                                 | 0.000                | 0.000             |                 |                |            |                                               | 0.000                | 0.000             |                 |                |                        |           |                |   |                   |  |  |
|                 | <i>" transcriptional regulator, AraC family [Methylobacillus flagellatus KT]637939297 YP_546478 ""</i>                          |                      |                   |                 |                |            |                                               |                      |                   |                 |                |                        |           |                |   |                   |  |  |
| <b>MFLA2371</b> |                                                                                                                                 | 3.221                | 2.862             | 4.053           | 1.755          | Y          | ●                                             | ●                    | Y                 | 2.11 E-2        | 21.703         | 21.415                 | 22.566    | 1.290          | Y | ●                 |  |  |
|                 | <i>" RND efflux system, outer membrane lipoprotein, NodT [Methylobacillus flagellatus KT]637939298 YP_546479 ""</i>             |                      |                   |                 |                |            |                                               |                      |                   |                 |                |                        |           |                |   |                   |  |  |
| <b>MFLA2372</b> |                                                                                                                                 | 4.032                | 2.000             | 4.347           | 1.017          | Y          | ●                                             | ●                    | Y                 | 1.17 E-1        | 22.304         | 21.092                 | 22.821    | 0.206          | Y | ●                 |  |  |
|                 | <i>secretion protein HlyD [Methylobacillus flagellatus KT]637939299 YP_546480</i>                                               |                      |                   |                 |                |            |                                               |                      |                   |                 |                |                        |           |                |   |                   |  |  |
| <b>MFLA2373</b> |                                                                                                                                 | 0.000                | 0.000             |                 |                |            |                                               | 0.000                | 0.000             |                 |                |                        |           |                |   |                   |  |  |
|                 | <i>[Methylobacillus flagellatus KT]639329603</i>                                                                                |                      |                   |                 |                |            |                                               |                      |                   |                 |                |                        |           |                |   |                   |  |  |
| <b>MFLA2375</b> | 1.05 E-2                                                                                                                        | 5.964                | 5.854             | 6.910           | 0.000          | Y          | ●                                             | ●                    | Y                 | 1.12 E-1        | 26.343         | 25.353                 | 26.931    | 0.647          | Y | ●                 |  |  |
|                 | <i>hypothetical protein [Methylobacillus flagellatus KT]637939300 YP_546481</i>                                                 |                      |                   |                 |                |            |                                               |                      |                   |                 |                |                        |           |                |   |                   |  |  |
| <b>MFLA2376</b> |                                                                                                                                 | 2.621                | 0.000             | 2.838           | 2.621          | Y          | ●                                             | ●                    | Y                 |                 | 18.785         | 18.132                 | 19.495    | 0.652          | Y | ●                 |  |  |
|                 | <i>putative redox protein [Methylobacillus flagellatus KT]637939301 YP_546482</i>                                               |                      |                   |                 |                |            |                                               |                      |                   |                 |                |                        |           |                |   |                   |  |  |
| <b>MFLA2377</b> |                                                                                                                                 | 0.000                | 0.000             |                 |                |            |                                               | 0.000                | 0.000             |                 |                |                        |           |                |   |                   |  |  |
|                 | <i>Catalase [Methylobacillus flagellatus KT]637939302 YP_546483</i>                                                             |                      |                   |                 |                |            |                                               |                      |                   |                 |                |                        |           |                |   |                   |  |  |
| <b>MFLA2378</b> |                                                                                                                                 | 0.000                | 0.000             |                 |                |            |                                               | 0.000                | 0.000             |                 |                |                        |           |                |   |                   |  |  |
|                 | <i>hypothetical protein [Methylobacillus flagellatus KT]637939304 YP_546484</i>                                                 |                      |                   |                 |                |            |                                               |                      |                   |                 |                |                        |           |                |   |                   |  |  |
| <b>MFLA2379</b> |                                                                                                                                 | 2.967                | 1.931             | 3.540           | 0.028          | Y          | ●                                             | ●                    | Y                 | 8.91 E-2        | 20.626         | 20.609                 | 21.618    | -1.103         | Y | ●                 |  |  |
|                 | <i>phospholipase D/Transphosphatidylase [Methylobacillus flagellatus KT]637939305 YP_546485</i>                                 |                      |                   |                 |                |            |                                               |                      |                   |                 |                |                        |           |                |   |                   |  |  |
| <b>MFLA2380</b> |                                                                                                                                 | 2.691                | 1.915             | 3.354           | 1.856          | Y          | ●                                             | ●                    | Y                 | 2.7 E-1         | 19.330         | 20.288                 | 20.887    | 0.321          | Y | ●                 |  |  |
|                 | <i>Endonuclease/exonuclease/phosphatase [Methylobacillus flagellatus KT]637939306 YP_546486</i>                                 |                      |                   |                 |                |            |                                               |                      |                   |                 |                |                        |           |                |   |                   |  |  |
| <b>MFLA2381</b> |                                                                                                                                 | 6.616                | 7.145             | 7.905           | -0.548         | Y          | ●                                             | ●                    | Y                 | 6.21 E-2        | 25.481         | 25.968                 | 26.745    | -0.532         | Y | ●                 |  |  |
|                 | <i>" quinolinate synthetase complex, A subunit [Methylobacillus flagellatus KT]637939307 YP_546487 ""</i>                       |                      |                   |                 |                |            |                                               |                      |                   |                 |                |                        |           |                |   |                   |  |  |
| <b>MFLA2382</b> |                                                                                                                                 | 2.106                | 3.600             | 4.038           | -0.445         | Y          | ●                                             | ●                    | Y                 | 1.33 E-1        | 20.577         | 22.284                 | 22.670    | -0.627         | Y | ●                 |  |  |
|                 | <i>NUDIX hydrolase [Methylobacillus flagellatus KT]637939308 YP_546488</i>                                                      |                      |                   |                 |                |            |                                               |                      |                   |                 |                |                        |           |                |   |                   |  |  |
| <b>MFLA2383</b> |                                                                                                                                 | 0.000                | 0.000             |                 |                |            |                                               | 0.000                | 0.000             |                 |                |                        |           |                |   |                   |  |  |
|                 | <i>adenine phosphoribosyltransferase [Methylobacillus flagellatus KT]637939309 YP_546489</i>                                    |                      |                   |                 |                |            |                                               |                      |                   |                 |                |                        |           |                |   |                   |  |  |
| <b>MFLA2384</b> | 2.89 E-5                                                                                                                        | 7.813                | 7.402             | 8.622           | 0.385          | Y          | ●                                             | ●                    | Y                 | 1.08 E-1        | 26.914         | 27.195                 | 28.061    | -0.328         | Y | ●                 |  |  |
|                 | <i>aspartyl-tRNA synthetase [Methylobacillus flagellatus KT]637939310 YP_546490</i>                                             |                      |                   |                 |                |            |                                               |                      |                   |                 |                |                        |           |                |   |                   |  |  |
| <b>MFLA2385</b> |                                                                                                                                 | 0.000                | 0.000             |                 |                |            |                                               | 0.000                | 0.000             |                 |                |                        |           |                |   |                   |  |  |
|                 | <i>protein of unknown function DUF502 [Methylobacillus flagellatus KT]637939311 YP_546491</i>                                   |                      |                   |                 |                |            |                                               |                      |                   |                 |                |                        |           |                |   |                   |  |  |
| <b>MFLA2386</b> |                                                                                                                                 |                      | 4.769             | 4.769           |                | Y          | ●                                             | ●                    | Y                 |                 |                | 22.918                 | 22.918    |                | Y | ●                 |  |  |
|                 | <i>hypothetical protein [Methylobacillus flagellatus KT]637939312 YP_546492</i>                                                 |                      |                   |                 |                |            |                                               |                      |                   |                 |                |                        |           |                |   |                   |  |  |
| <b>MFLA2387</b> |                                                                                                                                 | 0.521                |                   | 0.521           |                | Y          | ●                                             | ●                    | Y                 |                 | 17.752         |                        | 17.752    |                | Y | ●                 |  |  |
|                 | <i>TonB-dependent siderophore receptor [Methylobacillus flagellatus KT]637939313 YP_546493</i>                                  |                      |                   |                 |                |            |                                               |                      |                   |                 |                |                        |           |                |   |                   |  |  |
| <b>MFLA2388</b> |                                                                                                                                 | 1.106                | 1.000             | 2.054           | 0.106          | Y          | ●                                             | ●                    | Y                 |                 | 19.316         | 21.190                 | 21.538    | -1.874         | Y | ●                 |  |  |
|                 | <i>" extracellular solute-binding protein, family 5 [Methylobacillus flagellatus KT]637939314 YP_546494 ""</i>                  |                      |                   |                 |                |            |                                               |                      |                   |                 |                |                        |           |                |   |                   |  |  |
| <b>MFLA2389</b> |                                                                                                                                 | 0.000                | 0.000             |                 |                |            |                                               | 0.000                | 0.000             |                 |                |                        |           |                |   |                   |  |  |
|                 | <i>binding-protein-dependent transport systems inner membrane component [Methylobacillus flagellatus KT]637939315 YP_546495</i> |                      |                   |                 |                |            |                                               |                      |                   |                 |                |                        |           |                |   |                   |  |  |



| ORF             | AM/OH <i>M. Flagellatus</i> Spectral Count                                                                                      |                              |                           |                         |                        |            | AM/OH <i>M. Flagellatus</i> Protein Intensity |                              |                           |                         |                        |  | Consensus | Log <sub>2</sub> Ratio |
|-----------------|---------------------------------------------------------------------------------------------------------------------------------|------------------------------|---------------------------|-------------------------|------------------------|------------|-----------------------------------------------|------------------------------|---------------------------|-------------------------|------------------------|--|-----------|------------------------|
|                 | q-value                                                                                                                         | log <sub>2</sub> Methylamine | log <sub>2</sub> Methanol | log <sub>2</sub> Sc Sum | log <sub>2</sub> Ratio | Regulation | q-value                                       | log <sub>2</sub> Methylamine | log <sub>2</sub> Methanol | log <sub>2</sub> PI Sum | log <sub>2</sub> Ratio |  |           |                        |
| <b>MFLA2390</b> |                                                                                                                                 | 0.000                        | 0.000                     |                         |                        |            |                                               | 0.000                        | 0.000                     |                         |                        |  |           |                        |
|                 | <i>binding-protein-dependent transport systems inner membrane component [Methylobacillus flagellatus KT]637939316 YP_546496</i> |                              |                           |                         |                        |            |                                               |                              |                           |                         |                        |  |           |                        |
| <b>MFLA2391</b> |                                                                                                                                 |                              | 0.000                     | 0.000                   |                        | Y ●● Y     |                                               |                              | 18.641                    | 18.641                  |                        |  | Y ●       |                        |
|                 | <i>ABC transporter related [Methylobacillus flagellatus KT]637939317 YP_546497</i>                                              |                              |                           |                         |                        |            |                                               |                              |                           |                         |                        |  |           |                        |
| <b>MFLA2392</b> |                                                                                                                                 | 0.000                        | 0.000                     |                         |                        |            |                                               | 0.000                        | 0.000                     |                         |                        |  |           |                        |
|                 | <i>OmpA/MotB [Methylobacillus flagellatus KT]637939318 YP_546498</i>                                                            |                              |                           |                         |                        |            |                                               |                              |                           |                         |                        |  |           |                        |
| <b>MFLA2393</b> |                                                                                                                                 | 0.000                        | 0.000                     |                         |                        |            |                                               | 0.000                        | 0.000                     |                         |                        |  |           |                        |
|                 | <i>protein of unknown function DUF11 [Methylobacillus flagellatus KT]637939319 YP_546499</i>                                    |                              |                           |                         |                        |            |                                               |                              |                           |                         |                        |  |           |                        |
| <b>MFLA2394</b> |                                                                                                                                 | 0.521                        |                           | 0.521                   |                        | Y ●● Y     |                                               | 19.146                       |                           | 19.146                  |                        |  | Y ●       |                        |
|                 | <i>" two component transcriptional regulator, winged helix family [Methylobacillus flagellatus KT]637939320 YP_546500 ""</i>    |                              |                           |                         |                        |            |                                               |                              |                           |                         |                        |  |           |                        |
| <b>MFLA2395</b> |                                                                                                                                 | 0.000                        | 0.000                     |                         |                        |            |                                               | 0.000                        | 0.000                     |                         |                        |  |           |                        |
|                 | <i>periplasmic sensor signal transduction histidine kinase [Methylobacillus flagellatus KT]637939321 YP_546501</i>              |                              |                           |                         |                        |            |                                               |                              |                           |                         |                        |  |           |                        |
| <b>MFLA2396</b> |                                                                                                                                 | 0.000                        | 0.000                     |                         |                        |            |                                               | 0.000                        | 0.000                     |                         |                        |  |           |                        |
|                 | <i>protein of unknown function DUF1555 [Methylobacillus flagellatus KT]637939322 YP_546502</i>                                  |                              |                           |                         |                        |            |                                               |                              |                           |                         |                        |  |           |                        |
| <b>MFLA2397</b> |                                                                                                                                 | 0.000                        | 0.000                     |                         |                        |            |                                               | 0.000                        | 0.000                     |                         |                        |  |           |                        |
|                 | <i>hypothetical protein [Methylobacillus flagellatus KT]637939323 YP_546503</i>                                                 |                              |                           |                         |                        |            |                                               |                              |                           |                         |                        |  |           |                        |
| <b>MFLA2398</b> |                                                                                                                                 | 0.000                        | 0.000                     |                         |                        |            |                                               | 0.000                        | 0.000                     |                         |                        |  |           |                        |
|                 | <i>hypothetical protein [Methylobacillus flagellatus KT]637939324 YP_546504</i>                                                 |                              |                           |                         |                        |            |                                               |                              |                           |                         |                        |  |           |                        |
| <b>MFLA2399</b> |                                                                                                                                 | 0.000                        | 0.000                     |                         |                        |            |                                               | 0.000                        | 0.000                     |                         |                        |  |           |                        |
|                 | <i>hypothetical protein [Methylobacillus flagellatus KT]637939325 YP_546505</i>                                                 |                              |                           |                         |                        |            |                                               |                              |                           |                         |                        |  |           |                        |
| <b>MFLA2400</b> |                                                                                                                                 | 0.000                        | 0.000                     |                         |                        |            |                                               | 0.000                        | 0.000                     |                         |                        |  |           |                        |
|                 | <i>hypothetical protein [Methylobacillus flagellatus KT]637939326 YP_546506</i>                                                 |                              |                           |                         |                        |            |                                               |                              |                           |                         |                        |  |           |                        |
| <b>MFLA2401</b> |                                                                                                                                 | 0.000                        | 0.000                     |                         |                        |            |                                               | 0.000                        | 0.000                     |                         |                        |  |           |                        |
|                 | <i>" TonB-dependent receptor, putative [Methylobacillus flagellatus KT]637939327 YP_546507 ""</i>                               |                              |                           |                         |                        |            |                                               |                              |                           |                         |                        |  |           |                        |
| <b>MFLA2402</b> |                                                                                                                                 | 0.000                        | 0.000                     |                         |                        |            |                                               | 0.000                        | 0.000                     |                         |                        |  |           |                        |
|                 | <i>Biopolymer transport protein ExbD/ToR [Methylobacillus flagellatus KT]637939328 YP_546508</i>                                |                              |                           |                         |                        |            |                                               |                              |                           |                         |                        |  |           |                        |
| <b>MFLA2403</b> |                                                                                                                                 | 0.000                        | 0.000                     |                         |                        |            |                                               | 0.000                        | 0.000                     |                         |                        |  |           |                        |
|                 | <i>Biopolymer transport protein ExbD/ToR [Methylobacillus flagellatus KT]637939329 YP_546509</i>                                |                              |                           |                         |                        |            |                                               |                              |                           |                         |                        |  |           |                        |
| <b>MFLA2404</b> |                                                                                                                                 | 0.000                        | 0.000                     |                         |                        |            |                                               | 0.000                        | 0.000                     |                         |                        |  |           |                        |
|                 | <i>MotA/ToIQ/ExbB proton channel [Methylobacillus flagellatus KT]637939330 YP_546510</i>                                        |                              |                           |                         |                        |            |                                               |                              |                           |                         |                        |  |           |                        |
| <b>MFLA2405</b> |                                                                                                                                 |                              | 2.154                     | 2.154                   |                        | Y ●● Y     |                                               |                              | 19.329                    | 19.329                  |                        |  | Y ●       |                        |
|                 | <i>Filamentous haemagglutinin-like protein [Methylobacillus flagellatus KT]637939331 YP_546511</i>                              |                              |                           |                         |                        |            |                                               |                              |                           |                         |                        |  |           |                        |
| <b>MFLA2406</b> |                                                                                                                                 | 0.000                        | 0.000                     |                         |                        |            |                                               | 0.000                        | 0.000                     |                         |                        |  |           |                        |
|                 | <i>hemolysin activation/secretion protein [Methylobacillus flagellatus KT]637939332 YP_546512</i>                               |                              |                           |                         |                        |            |                                               |                              |                           |                         |                        |  |           |                        |
| <b>MFLA2407</b> |                                                                                                                                 | 5.430                        | 4.435                     | 6.016                   | 0.883                  | Y ●● Y     | 1.04 E-1                                      | 23.547                       | 22.777                    | 24.213                  | 0.614                  |  | Y ●       |                        |
|                 | <i>hypothetical protein [Methylobacillus flagellatus KT]637939333 YP_546513</i>                                                 |                              |                           |                         |                        |            |                                               |                              |                           |                         |                        |  |           |                        |
| <b>MFLA2408</b> |                                                                                                                                 | 0.000                        | 0.000                     |                         |                        |            |                                               | 0.000                        | 0.000                     |                         |                        |  |           |                        |
|                 | <i>hypothetical protein [Methylobacillus flagellatus KT]637939334 YP_546514</i>                                                 |                              |                           |                         |                        |            |                                               |                              |                           |                         |                        |  |           |                        |
| <b>MFLA2409</b> |                                                                                                                                 | 0.000                        | 0.000                     |                         |                        |            |                                               | 0.000                        | 0.000                     |                         |                        |  |           |                        |
|                 | <i>" transcriptional regulator, LuxR family [Methylobacillus flagellatus KT]637939335 YP_546515 ""</i>                          |                              |                           |                         |                        |            |                                               |                              |                           |                         |                        |  |           |                        |
| <b>MFLA2410</b> |                                                                                                                                 | 0.000                        | 0.000                     |                         |                        |            |                                               | 0.000                        | 0.000                     |                         |                        |  |           |                        |
|                 | <i>" Lytic transglycosylase, catalytic [Methylobacillus flagellatus KT]637939336 YP_546516 ""</i>                               |                              |                           |                         |                        |            |                                               |                              |                           |                         |                        |  |           |                        |
| <b>MFLA2411</b> |                                                                                                                                 | 0.000                        | 0.000                     |                         |                        |            |                                               | 0.000                        | 0.000                     |                         |                        |  |           |                        |
|                 | <i>hypothetical protein [Methylobacillus flagellatus KT]637939337 YP_546517</i>                                                 |                              |                           |                         |                        |            |                                               |                              |                           |                         |                        |  |           |                        |



| ORF             | AM/OH <i>M. Flagellatus</i> Spectral Count                                                                                 |                      |                   |                 |                 |            | AM/OH <i>M. Flagellatus</i> Protein Intensity |                      |                   |                 |                 |           | Spectral Count         |  | Protein Intensity |  |
|-----------------|----------------------------------------------------------------------------------------------------------------------------|----------------------|-------------------|-----------------|-----------------|------------|-----------------------------------------------|----------------------|-------------------|-----------------|-----------------|-----------|------------------------|--|-------------------|--|
|                 | $q$ -value                                                                                                                 | $\log_2$ Methylamine | $\log_2$ Methanol | $\log_2$ Sc Sum | $\log_2$ -Ratio | Regulation | $q$ -value                                    | $\log_2$ Methylamine | $\log_2$ Methanol | $\log_2$ PI Sum | $\log_2$ -Ratio | Consensus | Log <sub>2</sub> Ratio |  |                   |  |
| <b>MFLA2412</b> |                                                                                                                            | 0.000                | 0.000             |                 |                 | ■ ■        |                                               | 0.000                | 0.000             |                 |                 | ■         |                        |  |                   |  |
|                 | <i>methylation [Methylobacillus flagellatus KT]637939338 YP_546518</i>                                                     |                      |                   |                 |                 |            |                                               |                      |                   |                 |                 |           |                        |  |                   |  |
| <b>MFLA2413</b> |                                                                                                                            | 0.000                | 0.000             |                 |                 | ■ ■        |                                               | 0.000                | 0.000             |                 |                 | ■         |                        |  |                   |  |
|                 | <i>methylation [Methylobacillus flagellatus KT]637939339 YP_546519</i>                                                     |                      |                   |                 |                 |            |                                               |                      |                   |                 |                 |           |                        |  |                   |  |
| <b>MFLA2414</b> |                                                                                                                            |                      | 1.322             | 1.322           |                 | Y ● ● Y    |                                               |                      |                   | 18.263          | 18.263          | Y ●       |                        |  |                   |  |
|                 | <i>type II and III secretion system protein [Methylobacillus flagellatus KT]637939340 YP_546520</i>                        |                      |                   |                 |                 |            |                                               |                      |                   |                 |                 |           |                        |  |                   |  |
| <b>MFLA2415</b> |                                                                                                                            | 0.000                | 0.000             |                 |                 | ■ ■        |                                               | 0.000                | 0.000             |                 |                 | ■         |                        |  |                   |  |
|                 | <i>putative prolin-rich transmembrane protein [Methylobacillus flagellatus KT]637939341 YP_546521</i>                      |                      |                   |                 |                 |            |                                               |                      |                   |                 |                 |           |                        |  |                   |  |
| <b>MFLA2416</b> |                                                                                                                            | 0.000                | 0.000             |                 |                 | ■ ■        |                                               | 0.000                | 0.000             |                 |                 | ■         |                        |  |                   |  |
|                 | <i>hypothetical protein [Methylobacillus flagellatus KT]637939342 YP_546522</i>                                            |                      |                   |                 |                 |            |                                               |                      |                   |                 |                 |           |                        |  |                   |  |
| <b>MFLA2417</b> |                                                                                                                            | 0.000                | 0.000             |                 |                 | ■ ■        |                                               | 0.000                | 0.000             |                 |                 | ■         |                        |  |                   |  |
|                 | <i>Fimbrial assembly [Methylobacillus flagellatus KT]637939343 YP_546523</i>                                               |                      |                   |                 |                 |            |                                               |                      |                   |                 |                 |           |                        |  |                   |  |
| <b>MFLA2418</b> |                                                                                                                            | 0.000                | 0.000             |                 |                 | ■ ■        |                                               | 0.000                | 0.000             |                 |                 | ■         |                        |  |                   |  |
|                 | <i>hypothetical protein [Methylobacillus flagellatus KT]637939344 YP_546524</i>                                            |                      |                   |                 |                 |            |                                               |                      |                   |                 |                 |           |                        |  |                   |  |
| <b>MFLA2419</b> |                                                                                                                            | 0.000                | 0.000             |                 |                 | ■ ■        |                                               | 0.000                | 0.000             |                 |                 | ■         |                        |  |                   |  |
|                 | <i>type II secretion system protein E [Methylobacillus flagellatus KT]637939345 YP_546525</i>                              |                      |                   |                 |                 |            |                                               |                      |                   |                 |                 |           |                        |  |                   |  |
| <b>MFLA2420</b> |                                                                                                                            | 0.000                | 0.000             |                 |                 | ■ ■        |                                               | 0.000                | 0.000             |                 |                 | ■         |                        |  |                   |  |
|                 | <i>type II secretion system protein [Methylobacillus flagellatus KT]637939346 YP_546526</i>                                |                      |                   |                 |                 |            |                                               |                      |                   |                 |                 |           |                        |  |                   |  |
| <b>MFLA2421</b> |                                                                                                                            | 0.000                | 0.000             |                 |                 | ■ ■        |                                               | 0.000                | 0.000             |                 |                 | ■         |                        |  |                   |  |
|                 | <i>General secretion pathway protein G [Methylobacillus flagellatus KT]637939347 YP_546527</i>                             |                      |                   |                 |                 |            |                                               |                      |                   |                 |                 |           |                        |  |                   |  |
| <b>MFLA2422</b> |                                                                                                                            | 0.000                | 0.000             |                 |                 | ■ ■        |                                               | 0.000                | 0.000             |                 |                 | ■         |                        |  |                   |  |
|                 | <i>diguanylate cyclase/phosphodiesterase (GGDEF &amp; EAL domains) [Methylobacillus flagellatus KT]637939348 YP_546528</i> |                      |                   |                 |                 |            |                                               |                      |                   |                 |                 |           |                        |  |                   |  |
| <b>MFLA2423</b> |                                                                                                                            |                      | 4.773             | 4.773           |                 | Y ● ● Y    |                                               |                      |                   | 25.070          | 25.070          | Y ●       |                        |  |                   |  |
|                 | <i>protein of unknown function DUF1555 [Methylobacillus flagellatus KT]637939349 YP_546529</i>                             |                      |                   |                 |                 |            |                                               |                      |                   |                 |                 |           |                        |  |                   |  |
| <b>MFLA2424</b> | 4.38 E-5                                                                                                                   | 5.699                | 6.509             | 7.160           | -0.817          | G ● ● Y    | 3.67 E-2                                      | 25.044               | 26.455            | 26.916          | -1.412          | G ●       |                        |  |                   |  |
|                 | <i>single-strand binding protein [Methylobacillus flagellatus KT]637939350 YP_546530</i>                                   |                      |                   |                 |                 |            |                                               |                      |                   |                 |                 |           |                        |  |                   |  |
| <b>MFLA2425</b> |                                                                                                                            | 0.813                | 1.585             | 2.250           | -0.772          | Y ● ● Y    |                                               | 19.820               | 20.042            | 20.935          | -0.222          | Y ●       |                        |  |                   |  |
|                 | <i>major facilitator superfamily MFS_1 [Methylobacillus flagellatus KT]637939351 YP_546531</i>                             |                      |                   |                 |                 |            |                                               |                      |                   |                 |                 |           |                        |  |                   |  |
| <b>MFLA2426</b> | 1.95 E-2                                                                                                                   | 6.840                | 7.071             | 7.960           | -0.210          | Y ● ● Y    | 2.4 E-2                                       | 25.686               | 26.204            | 26.968          | -0.528          | Y ●       |                        |  |                   |  |
|                 | <i>" excinuclease ABC, A subunit [Methylobacillus flagellatus KT]637939352 YP_546532 ""</i>                                |                      |                   |                 |                 |            |                                               |                      |                   |                 |                 |           |                        |  |                   |  |
| <b>MFLA2427</b> |                                                                                                                            | 0.000                | 0.000             |                 |                 | ■ ■        |                                               | 0.000                | 0.000             |                 |                 | ■         |                        |  |                   |  |
|                 | <i>hypothetical protein [Methylobacillus flagellatus KT]637939353 YP_546533</i>                                            |                      |                   |                 |                 |            |                                               |                      |                   |                 |                 |           |                        |  |                   |  |
| <b>MFLA2428</b> |                                                                                                                            | 0.000                | 0.000             |                 |                 | ■ ■        |                                               | 0.000                | 0.000             |                 |                 | ■         |                        |  |                   |  |
|                 | <i>hypothetical protein [Methylobacillus flagellatus KT]637939354 YP_546534</i>                                            |                      |                   |                 |                 |            |                                               |                      |                   |                 |                 |           |                        |  |                   |  |
| <b>MFLA2429</b> |                                                                                                                            | 0.000                | 0.000             |                 |                 | ■ ■        |                                               | 0.000                | 0.000             |                 |                 | ■         |                        |  |                   |  |
|                 | <i>hypothetical protein [Methylobacillus flagellatus KT]637939355 YP_546535</i>                                            |                      |                   |                 |                 |            |                                               |                      |                   |                 |                 |           |                        |  |                   |  |
| <b>MFLA2430</b> |                                                                                                                            | 0.000                | 0.000             |                 |                 | ■ ■        |                                               | 0.000                | 0.000             |                 |                 | ■         |                        |  |                   |  |
|                 | <i>DoxX [Methylobacillus flagellatus KT]637939356 YP_546536</i>                                                            |                      |                   |                 |                 |            |                                               |                      |                   |                 |                 |           |                        |  |                   |  |
| <b>MFLA2431</b> |                                                                                                                            | 5.661                | 5.873             | 6.771           | -0.238          | Y ● ● Y    | 1.15 E-1                                      | 24.857               | 24.602            | 25.735          | 0.300           | Y ●       |                        |  |                   |  |
|                 | <i>hydroxymethylbutenyl pyrophosphate reductase [Methylobacillus flagellatus KT]637939357 YP_546537</i>                    |                      |                   |                 |                 |            |                                               |                      |                   |                 |                 |           |                        |  |                   |  |
| <b>MFLA2432</b> |                                                                                                                            | 2.328                | 1.931             | 3.143           | 0.397           | Y ● ● Y    |                                               | 20.647               | 20.758            | 21.704          | -0.111          | Y ●       |                        |  |                   |  |
|                 | <i>cobalamin biosynthesis protein CbiB [Methylobacillus flagellatus KT]637939358 YP_546538</i>                             |                      |                   |                 |                 |            |                                               |                      |                   |                 |                 |           |                        |  |                   |  |
| <b>MFLA2433</b> |                                                                                                                            | 5.107                | 4.788             | 5.956           | 0.317           | Y ● ● Y    | 1.43 E-1                                      | 23.913               | 23.771            | 24.844          | 0.162           | Y ●       |                        |  |                   |  |
|                 | <i>hypothetical protein [Methylobacillus flagellatus KT]637939359 YP_546539</i>                                            |                      |                   |                 |                 |            |                                               |                      |                   |                 |                 |           |                        |  |                   |  |

| ORF             | AM/OH <i>M. Flagellatus</i> Spectral Count                                                                                      |                              |                           |                         |                        | AM/OH <i>M. Flagellatus</i> Protein Intensity |          |                              |                           |                         | Spectral Count         |           | Protein Intensity |  | Log <sub>2</sub> Ratio |
|-----------------|---------------------------------------------------------------------------------------------------------------------------------|------------------------------|---------------------------|-------------------------|------------------------|-----------------------------------------------|----------|------------------------------|---------------------------|-------------------------|------------------------|-----------|-------------------|--|------------------------|
|                 | q-value                                                                                                                         | log <sub>2</sub> Methylamine | log <sub>2</sub> Methanol | log <sub>2</sub> Sc Sum | log <sub>2</sub> Ratio | Regulation                                    | q-value  | log <sub>2</sub> Methylamine | log <sub>2</sub> Methanol | log <sub>2</sub> PI Sum | log <sub>2</sub> Ratio | Consensus |                   |  |                        |
| <b>MFLA2434</b> |                                                                                                                                 | 7.572                        | 6.530                     | 8.143                   | 0.867                  | Y ●●● Y                                       | 1.11 E-1 | 25.417                       | 25.807                    | 26.625                  | -0.471                 | Y ●●      |                   |  |                        |
|                 | <i>formyltetrahydrofolate deformylase [Methylobacillus flagellatus KT]637939360 YP_546540</i>                                   |                              |                           |                         |                        |                                               |          |                              |                           |                         |                        |           |                   |  |                        |
| <b>MFLA2435</b> |                                                                                                                                 | 4.413                        | 4.862                     | 5.655                   | -0.428                 | Y ●●● Y                                       | 1.83 E-1 | 23.112                       | 23.560                    | 24.354                  | -1.673                 | Y ●●      |                   |  |                        |
|                 | <i>outer membrane efflux protein [Methylobacillus flagellatus KT]637939361 YP_546541</i>                                        |                              |                           |                         |                        |                                               |          |                              |                           |                         |                        |           |                   |  |                        |
| <b>MFLA2436</b> |                                                                                                                                 | 0.521                        |                           | 0.521                   |                        | Y ●●● Y                                       |          | 20.494                       |                           | 20.494                  |                        | Y ●●      |                   |  |                        |
|                 | <i>hypothetical protein [Methylobacillus flagellatus KT]637939362 YP_546542</i>                                                 |                              |                           |                         |                        |                                               |          |                              |                           |                         |                        |           |                   |  |                        |
| <b>MFLA2437</b> |                                                                                                                                 | 1.843                        |                           | 1.843                   |                        | Y ●●● Y                                       |          | 20.273                       |                           | 20.273                  |                        | Y ●●      |                   |  |                        |
|                 | <i>" Type I secretion membrane fusion protein, HlyD [Methylobacillus flagellatus KT]637939363 YP_546543 ""</i>                  |                              |                           |                         |                        |                                               |          |                              |                           |                         |                        |           |                   |  |                        |
| <b>MFLA2438</b> | 1.32 E-1                                                                                                                        | 5.502                        | 5.550                     | 6.526                   | -0.044                 | Y ●●● Y                                       | 2.7 E-1  | 25.200                       | 25.225                    | 26.212                  | -0.106                 | Y ●●      |                   |  |                        |
|                 | <i>hypothetical protein [Methylobacillus flagellatus KT]637939364 YP_546544</i>                                                 |                              |                           |                         |                        |                                               |          |                              |                           |                         |                        |           |                   |  |                        |
| <b>MFLA2439</b> |                                                                                                                                 | 2.025                        | 5.042                     | 5.210                   | -3.012                 | Y ●●● Y                                       | 6.34 E-2 | 22.011                       | 23.725                    | 24.109                  | -1.524                 | Y ●●      |                   |  |                        |
|                 | <i>Hemolysin-type calcium-binding region [Methylobacillus flagellatus KT]637939365 YP_546545</i>                                |                              |                           |                         |                        |                                               |          |                              |                           |                         |                        |           |                   |  |                        |
| <b>MFLA2440</b> |                                                                                                                                 | 2.543                        | 2.739                     | 3.645                   | -0.410                 | Y ●●● Y                                       | 1.14 E-1 | 22.315                       | 21.853                    | 23.103                  | 0.419                  | Y ●●      |                   |  |                        |
|                 | <i>ABC transporter related [Methylobacillus flagellatus KT]637939366 YP_546546</i>                                              |                              |                           |                         |                        |                                               |          |                              |                           |                         |                        |           |                   |  |                        |
| <b>MFLA2441</b> |                                                                                                                                 | 0.000                        | 0.000                     |                         |                        | ●●●                                           |          | 0.000                        | 0.000                     |                         |                        | ●●●       |                   |  |                        |
|                 | <i>Chromate transporter [Methylobacillus flagellatus KT]637939367 YP_546547</i>                                                 |                              |                           |                         |                        |                                               |          |                              |                           |                         |                        |           |                   |  |                        |
| <b>MFLA2442</b> |                                                                                                                                 | 0.000                        | 0.000                     |                         |                        | ●●●                                           |          | 0.000                        | 0.000                     |                         |                        | ●●●       |                   |  |                        |
|                 | <i>hypothetical protein [Methylobacillus flagellatus KT]637939368 YP_546548</i>                                                 |                              |                           |                         |                        |                                               |          |                              |                           |                         |                        |           |                   |  |                        |
| <b>MFLA2443</b> | 1.46 E-8                                                                                                                        | 5.463                        | 6.457                     | 7.044                   | -0.913                 | G ●●● Y                                       | 6.49 E-2 | 25.282                       | 25.864                    | 26.602                  | -0.643                 | G ●●      |                   |  |                        |
|                 | <i>diaminopimelate decarboxylase [Methylobacillus flagellatus KT]637939369 YP_546549</i>                                        |                              |                           |                         |                        |                                               |          |                              |                           |                         |                        |           |                   |  |                        |
| <b>MFLA2444</b> |                                                                                                                                 | 0.000                        | 0.000                     |                         |                        | ●●●                                           |          | 0.000                        | 0.000                     |                         |                        | ●●●       |                   |  |                        |
|                 | <i>Monofunctional biosynthetic peptidoglycan transglycosylase [Methylobacillus flagellatus KT]637939370 YP_546550</i>           |                              |                           |                         |                        |                                               |          |                              |                           |                         |                        |           |                   |  |                        |
| <b>MFLA2445</b> |                                                                                                                                 | 4.277                        | 4.999                     | 5.683                   | -0.736                 | Y ●●● Y                                       | 1.17 E-1 | 22.381                       | 22.733                    | 23.568                  | -0.380                 | Y ●●      |                   |  |                        |
|                 | <i>shikimate 5-dehydrogenase [Methylobacillus flagellatus KT]637939371 YP_546551</i>                                            |                              |                           |                         |                        |                                               |          |                              |                           |                         |                        |           |                   |  |                        |
| <b>MFLA2446</b> |                                                                                                                                 | 7.641                        | 7.747                     | 8.695                   | -0.127                 | Y ●●● Y                                       | 3.53 E-2 | 26.538                       | 26.237                    | 27.395                  | 0.310                  | Y ●●      |                   |  |                        |
|                 | <i>Rhodanese-like protein [Methylobacillus flagellatus KT]637939372 YP_546552</i>                                               |                              |                           |                         |                        |                                               |          |                              |                           |                         |                        |           |                   |  |                        |
| <b>MFLA2447</b> | 0                                                                                                                               | 9.180                        | 10.195                    | 10.775                  | -1.036                 | G ●●● G                                       | 8.9 E-3  | 28.192                       | 29.561                    | 30.033                  | -1.363                 | G ●●      |                   |  |                        |
|                 | <i>" glutamine synthetase, type I [Methylobacillus flagellatus KT]637939373 YP_546553 ""</i>                                    |                              |                           |                         |                        |                                               |          |                              |                           |                         |                        |           |                   |  |                        |
| <b>MFLA2448</b> |                                                                                                                                 | 0.000                        | 0.000                     |                         |                        | ●●●                                           |          | 0.000                        | 0.000                     |                         |                        | ●●●       |                   |  |                        |
|                 | <i>hypothetical protein [Methylobacillus flagellatus KT]637939374 YP_546554</i>                                                 |                              |                           |                         |                        |                                               |          |                              |                           |                         |                        |           |                   |  |                        |
| <b>MFLA2449</b> |                                                                                                                                 |                              | 0.000                     | 0.000                   |                        | Y ●●● Y                                       |          | 19.601                       | 19.601                    |                         |                        | Y ●●      |                   |  |                        |
|                 | <i>" signal transduction histidine kinase, nitrogen specific, NtrB [Methylobacillus flagellatus KT]637939375 YP_546555 ""</i>   |                              |                           |                         |                        |                                               |          |                              |                           |                         |                        |           |                   |  |                        |
| <b>MFLA2450</b> |                                                                                                                                 | 4.522                        | 4.288                     | 5.410                   | 0.160                  | Y ●●● Y                                       | 1.04 E-1 | 22.883                       | 22.742                    | 23.814                  | 0.140                  | Y ●●      |                   |  |                        |
|                 | <i>" nitrogen metabolism transcriptional regulator, NtrC, Fis Family [Methylobacillus flagellatus KT]637939376 YP_546556 ""</i> |                              |                           |                         |                        |                                               |          |                              |                           |                         |                        |           |                   |  |                        |
| <b>MFLA2451</b> |                                                                                                                                 | 2.637                        | 5.631                     | 5.802                   | -3.009                 | Y ●●● G                                       | 8.35 E-3 | 22.759                       | 23.626                    | 24.257                  | -0.878                 | G ●●      |                   |  |                        |
|                 | <i>protein of unknown function DUF86 [Methylobacillus flagellatus KT]637939377 YP_546557</i>                                    |                              |                           |                         |                        |                                               |          |                              |                           |                         |                        |           |                   |  |                        |
| <b>MFLA2452</b> |                                                                                                                                 | 0.000                        | 0.000                     |                         |                        | ●●●                                           |          | 0.000                        | 0.000                     |                         |                        | ●●●       |                   |  |                        |
|                 | <i>" DNA polymerase, beta-like region [Methylobacillus flagellatus KT]637939378 YP_546558 ""</i>                                |                              |                           |                         |                        |                                               |          |                              |                           |                         |                        |           |                   |  |                        |
| <b>MFLA2453</b> | 0                                                                                                                               | 13.800                       | 9.662                     | 13.880                  | 4.446                  | R ●●● Y                                       | 1.18 E-2 | 34.023                       | 29.425                    | 34.081                  | 4.833                  | R ●●      |                   |  |                        |
|                 | <i>hypothetical protein [Methylobacillus flagellatus KT]637939379 YP_546559</i>                                                 |                              |                           |                         |                        |                                               |          |                              |                           |                         |                        |           |                   |  |                        |
| <b>MFLA2454</b> |                                                                                                                                 | 3.461                        | 1.471                     | 3.785                   | 1.994                  | Y ●●● Y                                       | 1.04 E-1 | 22.323                       | 20.123                    | 22.608                  | 1.019                  | Y ●●      |                   |  |                        |
|                 | <i>Deoxyguanosinetriphosphate triphosphohydrolase [Methylobacillus flagellatus KT]637939380 YP_546560</i>                       |                              |                           |                         |                        |                                               |          |                              |                           |                         |                        |           |                   |  |                        |
| <b>MFLA2455</b> | 0                                                                                                                               | 5.476                        | 6.973                     | 7.411                   | -1.539                 | G ●●● Y                                       | 1.22 E-2 | 25.126                       | 26.694                    | 27.114                  | -1.698                 | G ●●      |                   |  |                        |
|                 | <i>3-dehydroquinate synthase [Methylobacillus flagellatus KT]637939381 YP_546561</i>                                            |                              |                           |                         |                        |                                               |          |                              |                           |                         |                        |           |                   |  |                        |



AM/OH *M. Flagellatus* Spectral Count

AM/OH *M. Flagellatus* Protein Intensity

| ORF             | AM/OH <i>M. Flagellatus</i> Spectral Count                                                                                                        |                              |                           |                         |                        | AM/OH <i>M. Flagellatus</i> Protein Intensity |          |                              |                           |                         | Consensus | Log <sub>2</sub> Ratio |                        |
|-----------------|---------------------------------------------------------------------------------------------------------------------------------------------------|------------------------------|---------------------------|-------------------------|------------------------|-----------------------------------------------|----------|------------------------------|---------------------------|-------------------------|-----------|------------------------|------------------------|
|                 | q-value                                                                                                                                           | log <sub>2</sub> Methylamine | log <sub>2</sub> Methanol | log <sub>2</sub> Sc Sum | log <sub>2</sub> Ratio | Regulation                                    | q-value  | log <sub>2</sub> Methylamine | log <sub>2</sub> Methanol | log <sub>2</sub> PI Sum |           |                        | log <sub>2</sub> Ratio |
| <b>MFLA2456</b> | 1.42 E-1                                                                                                                                          | 5.814                        | 5.703                     | 6.760                   | 0.117                  | Y ●● Y                                        | 9.25 E-2 | 23.556                       | 24.120                    | 24.865                  | -0.611    | Y ●●                   |                        |
|                 | <i>Shikimate kinase [Methylobacillus flagellatus KT]637939382 YP_546562</i>                                                                       |                              |                           |                         |                        |                                               |          |                              |                           |                         |           |                        |                        |
| <b>MFLA2457</b> |                                                                                                                                                   | 7.032                        | 6.503                     | 7.792                   | 0.655                  | Y ●● Y                                        | 2.27 E-2 | 26.654                       | 25.635                    | 27.232                  | 1.053     | Y ●●                   |                        |
|                 | <i>type II and III secretion system protein [Methylobacillus flagellatus KT]637939383 YP_546563</i>                                               |                              |                           |                         |                        |                                               |          |                              |                           |                         |           |                        |                        |
| <b>MFLA2458</b> |                                                                                                                                                   | 4.419                        | 4.844                     | 5.647                   | -0.224                 | Y ●● Y                                        | 8.3 E-2  | 24.335                       | 23.706                    | 25.055                  | 0.707     | Y ●●                   |                        |
|                 | <i>type IV pilus assembly protein PilP [Methylobacillus flagellatus KT]637939384 YP_546564</i>                                                    |                              |                           |                         |                        |                                               |          |                              |                           |                         |           |                        |                        |
| <b>MFLA2459</b> |                                                                                                                                                   | 4.397                        | 3.893                     | 5.167                   | 0.472                  | Y ●● R                                        | 8.91 E-3 | 23.851                       | 23.148                    | 24.542                  | 0.700     | R ●●                   |                        |
|                 | <i>" Pilus assembly protein, PilO [Methylobacillus flagellatus KT]637939385 YP_546565 ""</i>                                                      |                              |                           |                         |                        |                                               |          |                              |                           |                         |           |                        |                        |
| <b>MFLA2460</b> |                                                                                                                                                   | 3.482                        | 3.422                     | 4.452                   | 0.055                  | Y ●● Y                                        | 4.33 E-2 | 22.839                       | 23.450                    | 24.177                  | -0.628    | Y ●●                   |                        |
|                 | <i>Fimbrial assembly [Methylobacillus flagellatus KT]637939386 YP_546566</i>                                                                      |                              |                           |                         |                        |                                               |          |                              |                           |                         |           |                        |                        |
| <b>MFLA2461</b> | 1.06 E-1                                                                                                                                          | 5.515                        | 5.278                     | 6.401                   | 0.225                  | Y ●● Y                                        | 1.75 E-1 | 24.027                       | 24.326                    | 25.184                  | -0.157    | Y ●●                   |                        |
|                 | <i>type IV pilus assembly protein PilM [Methylobacillus flagellatus KT]637939387 YP_546567</i>                                                    |                              |                           |                         |                        |                                               |          |                              |                           |                         |           |                        |                        |
| <b>MFLA2462</b> | 1.1 E-2                                                                                                                                           | 6.504                        | 6.840                     | 7.682                   | -0.347                 | Y ●● Y                                        | 1.1 E-2  | 26.304                       | 26.972                    | 27.677                  | -0.679    | Y ●●                   |                        |
|                 | <i>Penicillin-binding protein 1A [Methylobacillus flagellatus KT]637939388 YP_546568</i>                                                          |                              |                           |                         |                        |                                               |          |                              |                           |                         |           |                        |                        |
| <b>MFLA2463</b> |                                                                                                                                                   | 3.120                        | 2.184                     | 3.727                   | 0.947                  | Y ●● Y                                        | 2.03 E-1 | 21.048                       | 21.320                    | 22.190                  | -0.166    | Y ●●                   |                        |
|                 | <i>hypothetical protein [Methylobacillus flagellatus KT]637939389 YP_546569</i>                                                                   |                              |                           |                         |                        |                                               |          |                              |                           |                         |           |                        |                        |
| <b>MFLA2464</b> | 2.03 E-2                                                                                                                                          | 5.964                        | 5.442                     | 6.726                   | 0.511                  | Y ●● Y                                        | 3.86 E-2 | 24.367                       | 24.825                    | 25.614                  | -0.466    | Y ●●                   |                        |
|                 | <i>Porphobilinogen synthase [Methylobacillus flagellatus KT]637939390 YP_546570</i>                                                               |                              |                           |                         |                        |                                               |          |                              |                           |                         |           |                        |                        |
| <b>MFLA2465</b> | 1.75 E-2                                                                                                                                          | 5.874                        | 5.448                     | 6.677                   | 0.439                  | Y ●● Y                                        | 6.18 E-2 | 23.683                       | 24.460                    | 25.123                  | -0.816    | Y ●●                   |                        |
|                 | <i>Indole-3-glycerol-phosphate synthase [Methylobacillus flagellatus KT]637939391 YP_546571</i>                                                   |                              |                           |                         |                        |                                               |          |                              |                           |                         |           |                        |                        |
| <b>MFLA2466</b> |                                                                                                                                                   | 0.000                        | 0.000                     |                         |                        | ●●                                            |          | 0.000                        | 0.000                     |                         |           | ●●                     |                        |
|                 | <i>hypothetical protein [Methylobacillus flagellatus KT]637939392 YP_546572</i>                                                                   |                              |                           |                         |                        |                                               |          |                              |                           |                         |           |                        |                        |
| <b>MFLA2467</b> | 1.14 E-1                                                                                                                                          | 5.265                        | 5.363                     | 6.315                   | -0.092                 | Y ●● Y                                        | 8.56 E-2 | 23.870                       | 24.300                    | 25.101                  | -0.425    | Y ●●                   |                        |
|                 | <i>anthranilate phosphoribosyltransferase [Methylobacillus flagellatus KT]637939393 YP_546573</i>                                                 |                              |                           |                         |                        |                                               |          |                              |                           |                         |           |                        |                        |
| <b>MFLA2468</b> |                                                                                                                                                   | 7.214                        | 7.403                     | 8.312                   | -0.248                 | Y ●● Y                                        | 6.15 E-2 | 24.791                       | 25.562                    | 26.227                  | -0.742    | Y ●●                   |                        |
|                 | <i>glutamine amidotransferase of anthranilate synthase or para-aminobenzoate synthase [Methylobacillus flagellatus KT]637939394 YP_546574</i>     |                              |                           |                         |                        |                                               |          |                              |                           |                         |           |                        |                        |
| <b>MFLA2469</b> |                                                                                                                                                   | 3.427                        | 2.295                     | 3.970                   | 2.169                  | Y ●● Y                                        | 2.1 E-2  | 17.984                       | 20.105                    | 20.403                  | -1.121    | Y ●●                   |                        |
|                 | <i>diguanylate cyclase/phosphodiesterase (GGDEF &amp; EAL domains) with PAS/PAC sensor(s) [Methylobacillus flagellatus KT]637939395 YP_546575</i> |                              |                           |                         |                        |                                               |          |                              |                           |                         |           |                        |                        |
| <b>MFLA2470</b> |                                                                                                                                                   | 0.000                        | 0.000                     |                         |                        | ●●                                            |          | 0.000                        | 0.000                     |                         |           | ●●                     |                        |
|                 | <i>hypothetical protein [Methylobacillus flagellatus KT]637939396 YP_546576</i>                                                                   |                              |                           |                         |                        |                                               |          |                              |                           |                         |           |                        |                        |
| <b>MFLA2471</b> |                                                                                                                                                   | 8.420                        | 7.968                     | 9.212                   | 0.384                  | Y ●● Y                                        | 2.5 E-1  | 27.504                       | 27.561                    | 28.533                  | -0.137    | Y ●●                   |                        |
|                 | <i>anthranilate synthase component I [Methylobacillus flagellatus KT]637939397 YP_546577</i>                                                      |                              |                           |                         |                        |                                               |          |                              |                           |                         |           |                        |                        |
| <b>MFLA2472</b> | 5.7 E-11                                                                                                                                          | 8.704                        | 9.176                     | 9.959                   | -0.472                 | Y ●● Y                                        | 1.01 E-2 | 28.031                       | 28.630                    | 29.362                  | -0.604    | Y ●●                   |                        |
|                 | <i>Ribulose-phosphate 3-epimerase [Methylobacillus flagellatus KT]637939398 YP_546578</i>                                                         |                              |                           |                         |                        |                                               |          |                              |                           |                         |           |                        |                        |
| <b>MFLA2473</b> |                                                                                                                                                   | 4.429                        | 4.151                     | 5.296                   | 0.229                  | Y ●● Y                                        | 9.93 E-2 | 22.387                       | 22.955                    | 23.699                  | -0.736    | Y ●●                   |                        |
|                 | <i>Shikimate/quininate 5-dehydrogenase [Methylobacillus flagellatus KT]637939399 YP_546579</i>                                                    |                              |                           |                         |                        |                                               |          |                              |                           |                         |           |                        |                        |
| <b>MFLA2474</b> |                                                                                                                                                   | 5.389                        | 5.656                     | 6.529                   | -0.328                 | Y ●● Y                                        | 1.47 E-1 | 25.258                       | 25.602                    | 26.440                  | -0.263    | Y ●●                   |                        |
|                 | <i>peptide chain release factor 1 [Methylobacillus flagellatus KT]637939400 YP_546580</i>                                                         |                              |                           |                         |                        |                                               |          |                              |                           |                         |           |                        |                        |
| <b>MFLA2475</b> |                                                                                                                                                   | 0.000                        | 0.000                     |                         |                        | ●●                                            |          | 0.000                        | 0.000                     |                         |           | ●●                     |                        |
|                 | <i>hypothetical protein [Methylobacillus flagellatus KT]637939401 YP_546581</i>                                                                   |                              |                           |                         |                        |                                               |          |                              |                           |                         |           |                        |                        |
| <b>MFLA2476</b> |                                                                                                                                                   | 3.753                        | 3.523                     | 4.643                   | 0.264                  | Y ●● Y                                        | 1.41 E-1 | 22.077                       | 22.740                    | 23.447                  | -0.637    | Y ●●                   |                        |
|                 | <i>" modification methylase, HemK family [Methylobacillus flagellatus KT]637939402 YP_546582 ""</i>                                               |                              |                           |                         |                        |                                               |          |                              |                           |                         |           |                        |                        |
| <b>MFLA2477</b> |                                                                                                                                                   | 0.521                        |                           | 0.521                   |                        | Y ●● Y                                        |          | 19.623                       |                           | 19.623                  |           | Y ●●                   |                        |
|                 | <i>Beta-lactamase [Methylobacillus flagellatus KT]637939403 YP_546583</i>                                                                         |                              |                           |                         |                        |                                               |          |                              |                           |                         |           |                        |                        |

| ORF             | AM/OH <i>M. Flagellatus</i> Spectral Count                                                                      |                              |                           |                         |                         |            | AM/OH <i>M. Flagellatus</i> Protein Intensity |                              |                           |                         |                         |           | Spectral Count         |                        | Protein Intensity |   |
|-----------------|-----------------------------------------------------------------------------------------------------------------|------------------------------|---------------------------|-------------------------|-------------------------|------------|-----------------------------------------------|------------------------------|---------------------------|-------------------------|-------------------------|-----------|------------------------|------------------------|-------------------|---|
|                 | <i>q</i> -value                                                                                                 | log <sub>2</sub> Methylamine | log <sub>2</sub> Methanol | log <sub>2</sub> Sc Sum | log <sub>2</sub> -Ratio | Regulation | <i>q</i> -value                               | log <sub>2</sub> Methylamine | log <sub>2</sub> Methanol | log <sub>2</sub> PI Sum | log <sub>2</sub> -Ratio | Consensus | Log <sub>2</sub> Ratio | Log <sub>2</sub> Ratio |                   |   |
| <b>MFLA2478</b> |                                                                                                                 | 0.000                        | 0.000                     |                         |                         |            |                                               | 0.000                        | 0.000                     |                         |                         |           |                        |                        |                   |   |
|                 | <i>" protein of unknown function DUF6, transmembrane [Methylobacillus flagellatus KT]637939404 YP_546584 ""</i> |                              |                           |                         |                         |            |                                               |                              |                           |                         |                         |           |                        |                        |                   |   |
| <b>MFLA2479</b> |                                                                                                                 | 0.000                        | 0.000                     |                         |                         |            |                                               | 0.000                        | 0.000                     |                         |                         |           |                        |                        |                   |   |
|                 | <i>" putative carbonic anhydrase, family 3 [Methylobacillus flagellatus KT]637939405 YP_546585 ""</i>           |                              |                           |                         |                         |            |                                               |                              |                           |                         |                         |           |                        |                        |                   |   |
| <b>MFLA2480</b> | 5.62 E-3                                                                                                        | 4.705                        | 5.524                     | 6.172                   | -0.818                  | G          | ●                                             | ●                            | Y                         | 8.11 E-2                | 24.427                  | 24.880    | 25.672                 | -0.523                 | G                 | ● |
|                 | <i>homoserine O-acetyltransferase [Methylobacillus flagellatus KT]637939406 YP_546586</i>                       |                              |                           |                         |                         |            |                                               |                              |                           |                         |                         |           |                        |                        |                   |   |
| <b>MFLA2481</b> | 1.06 E-7                                                                                                        | 4.126                        | 5.601                     | 6.044                   | -1.520                  | G          | ●                                             | ●                            | Y                         | 4.64 E-2                | 22.610                  | 23.784    | 24.314                 | -1.566                 | G                 | ● |
|                 | <i>Methionine biosynthesis MetW [Methylobacillus flagellatus KT]637939407 YP_546587</i>                         |                              |                           |                         |                         |            |                                               |                              |                           |                         |                         |           |                        |                        |                   |   |
| <b>MFLA2482</b> |                                                                                                                 | 0.000                        | 0.000                     |                         |                         |            |                                               | 0.000                        | 0.000                     |                         |                         |           |                        |                        |                   |   |
|                 | <i>hypothetical protein [Methylobacillus flagellatus KT]637939408 YP_546588</i>                                 |                              |                           |                         |                         |            |                                               |                              |                           |                         |                         |           |                        |                        |                   |   |
| <b>MFLA2483</b> |                                                                                                                 | 0.000                        | 0.000                     |                         |                         |            |                                               | 0.000                        | 0.000                     |                         |                         |           |                        |                        |                   |   |
|                 | <i>major facilitator superfamily MFS_1 [Methylobacillus flagellatus KT]637939409 YP_546589</i>                  |                              |                           |                         |                         |            |                                               |                              |                           |                         |                         |           |                        |                        |                   |   |
| <b>MFLA2484</b> | 4.003                                                                                                           | 3.999                        | 5.001                     | -0.075                  | Y                       | ●          | ●                                             | Y                            | 4.29 E-2                  | 21.631                  | 22.771                  | 23.311    | -1.166                 | Y                      | ●                 |   |
|                 | <i>exodeoxyribonuclease III (xth) [Methylobacillus flagellatus KT]637939410 YP_546590</i>                       |                              |                           |                         |                         |            |                                               |                              |                           |                         |                         |           |                        |                        |                   |   |
| <b>MFLA2485</b> | 4.31 E-2                                                                                                        | 6.080                        | 6.159                     | 7.120                   | -0.135                  | Y          | ●                                             | ●                            | Y                         | 4.29 E-2                | 25.164                  | 25.813    | 26.525                 | -0.724                 | Y                 | ● |
|                 | <i>orotate phosphoribosyltransferase [Methylobacillus flagellatus KT]637939411 YP_546591</i>                    |                              |                           |                         |                         |            |                                               |                              |                           |                         |                         |           |                        |                        |                   |   |
| <b>MFLA2486</b> |                                                                                                                 |                              | 0.346                     | 0.346                   |                         | Y          | ●                                             | ●                            | Y                         |                         |                         | 17.766    | 17.766                 |                        | Y                 | ● |
|                 | <i>T/U mismatch-specific DNA glycosylase [Methylobacillus flagellatus KT]637939412 YP_546592</i>                |                              |                           |                         |                         |            |                                               |                              |                           |                         |                         |           |                        |                        |                   |   |
| <b>MFLA2487</b> |                                                                                                                 |                              | 2.562                     | 2.562                   |                         | Y          | ●                                             | ●                            | Y                         |                         |                         | 26.354    | 26.354                 |                        | Y                 | ● |
|                 | <i>hypothetical protein [Methylobacillus flagellatus KT]637939413 YP_546593</i>                                 |                              |                           |                         |                         |            |                                               |                              |                           |                         |                         |           |                        |                        |                   |   |
| <b>MFLA2488</b> | 5.04 E-7                                                                                                        | 7.844                        | 8.297                     | 9.088                   | -0.461                  | Y          | ●                                             | ●                            | Y                         | 1.97 E-1                | 27.097                  | 27.183    | 28.140                 | -0.109                 | Y                 | ● |
|                 | <i>" glutamyl-tRNA(Gln) amidotransferase, B subunit [Methylobacillus flagellatus KT]637939414 YP_546594 ""</i>  |                              |                           |                         |                         |            |                                               |                              |                           |                         |                         |           |                        |                        |                   |   |
| <b>MFLA2489</b> |                                                                                                                 | 5.620                        | 6.167                     | 6.919                   | -0.626                  | Y          | ●                                             | ●                            | Y                         | 4.11 E-2                | 25.406                  | 26.555    | 27.092                 | -1.149                 | Y                 | ● |
|                 | <i>" glutamyl-tRNA(Gln) amidotransferase, A subunit [Methylobacillus flagellatus KT]637939415 YP_546595 ""</i>  |                              |                           |                         |                         |            |                                               |                              |                           |                         |                         |           |                        |                        |                   |   |
| <b>MFLA2490</b> | 4.67 E-8                                                                                                        | 5.810                        | 6.810                     | 7.395                   | -1.000                  | G          | ●                                             | ●                            | Y                         | 1.32 E-2                | 24.675                  | 25.548    | 26.177                 | -0.902                 | G                 | ● |
|                 | <i>" glutamyl-tRNA(Gln) amidotransferase, C subunit [Methylobacillus flagellatus KT]637939416 YP_546596 ""</i>  |                              |                           |                         |                         |            |                                               |                              |                           |                         |                         |           |                        |                        |                   |   |
| <b>MFLA2491</b> | 1.54 E-3                                                                                                        | 8.047                        | 8.307                     | 9.183                   | -0.269                  | Y          | ●                                             | ●                            | G                         | 4.58 E-3                | 27.566                  | 28.758    | 29.282                 | -1.196                 | G                 | ● |
|                 | <i>" cell shape determining protein, MreB/Mrl family [Methylobacillus flagellatus KT]637939417 YP_546597 ""</i> |                              |                           |                         |                         |            |                                               |                              |                           |                         |                         |           |                        |                        |                   |   |
| <b>MFLA2492</b> |                                                                                                                 | 4.628                        | 4.494                     | 5.563                   | 0.116                   | Y          | ●                                             | ●                            | Y                         | 1.26 E-1                | 22.949                  | 23.408    | 24.197                 | -0.480                 | Y                 | ● |
|                 | <i>rod shape-determining protein MreC [Methylobacillus flagellatus KT]637939418 YP_546598</i>                   |                              |                           |                         |                         |            |                                               |                              |                           |                         |                         |           |                        |                        |                   |   |
| <b>MFLA2493</b> |                                                                                                                 | 0.000                        | 0.000                     |                         |                         |            |                                               | 0.000                        | 0.000                     |                         |                         |           |                        |                        |                   |   |
|                 | <i>Rod shape-determining protein MreD [Methylobacillus flagellatus KT]637939419 YP_546599</i>                   |                              |                           |                         |                         |            |                                               |                              |                           |                         |                         |           |                        |                        |                   |   |
| <b>MFLA2494</b> |                                                                                                                 | 4.025                        | 3.715                     | 4.878                   | 0.264                   | Y          | ●                                             | ●                            | Y                         | 2.7 E-1                 | 22.076                  | 22.061    | 23.068                 | 0.046                  | Y                 | ● |
|                 | <i>Peptidoglycan glycosyltransferase [Methylobacillus flagellatus KT]637939420 YP_546600</i>                    |                              |                           |                         |                         |            |                                               |                              |                           |                         |                         |           |                        |                        |                   |   |
| <b>MFLA2495</b> |                                                                                                                 | 0.000                        | 0.000                     |                         |                         |            |                                               | 0.000                        | 0.000                     |                         |                         |           |                        |                        |                   |   |
|                 | <i>Rod shape-determining protein RodA [Methylobacillus flagellatus KT]637939421 YP_546601</i>                   |                              |                           |                         |                         |            |                                               |                              |                           |                         |                         |           |                        |                        |                   |   |
| <b>MFLA2496</b> | 2.19 E-5                                                                                                        | 5.696                        | 4.523                     | 6.226                   | 1.207                   | R          | ●                                             | ●                            | Y                         | 1.1 E-2                 | 24.849                  | 23.928    | 25.461                 | 0.932                  | R                 | ● |
|                 | <i>rare lipoprotein A [Methylobacillus flagellatus KT]637939422 YP_546602</i>                                   |                              |                           |                         |                         |            |                                               |                              |                           |                         |                         |           |                        |                        |                   |   |
| <b>MFLA2497</b> | 0                                                                                                               | 7.546                        | 6.255                     | 8.040                   | 1.231                   | R          | ●                                             | ●                            | Y                         | 2.05 E-1                | 26.220                  | 26.338    | 27.280                 | -0.068                 | Y                 | ● |
|                 | <i>Serine-type D-Ala-D-Ala carboxypeptidase [Methylobacillus flagellatus KT]637939423 YP_546603</i>             |                              |                           |                         |                         |            |                                               |                              |                           |                         |                         |           |                        |                        |                   |   |
| <b>MFLA2498</b> |                                                                                                                 |                              | 1.540                     | 1.540                   |                         | Y          | ●                                             | ●                            | Y                         |                         |                         | 21.733    | 21.733                 |                        | Y                 | ● |
|                 | <i>" aminotransferase, class IV [Methylobacillus flagellatus KT]637939424 YP_546604 ""</i>                      |                              |                           |                         |                         |            |                                               |                              |                           |                         |                         |           |                        |                        |                   |   |
| <b>MFLA2499</b> |                                                                                                                 | 0.000                        | 0.000                     |                         |                         |            |                                               | 0.000                        | 0.000                     |                         |                         |           |                        |                        |                   |   |
|                 | <i>protein of unknown function DUF493 [Methylobacillus flagellatus KT]637939425 YP_546605</i>                   |                              |                           |                         |                         |            |                                               |                              |                           |                         |                         |           |                        |                        |                   |   |

| ORF             | AM/OH <i>M. Flagellatus</i> Spectral Count                                                                                      |                     |                   |                 |                |            | AM/OH <i>M. Flagellatus</i> Protein Intensity |                     |                   |                 |                |                        | Consensus | Spectral Count |   | Protein Intensity |  |
|-----------------|---------------------------------------------------------------------------------------------------------------------------------|---------------------|-------------------|-----------------|----------------|------------|-----------------------------------------------|---------------------|-------------------|-----------------|----------------|------------------------|-----------|----------------|---|-------------------|--|
|                 | $q$ -value                                                                                                                      | $\log_2$ Methyamine | $\log_2$ Methanol | $\log_2$ Sc Sum | $\log_2$ Ratio | Regulation | $q$ -value                                    | $\log_2$ Methyamine | $\log_2$ Methanol | $\log_2$ PI Sum | $\log_2$ Ratio | Log <sub>2</sub> Ratio |           | -7             | 0 | 7                 |  |
| <b>MFLA2500</b> |                                                                                                                                 | 0.000               | 0.000             |                 |                |            |                                               | 0.000               | 0.000             |                 |                |                        |           |                |   |                   |  |
|                 | <i>lipoate-protein ligase B [Methylobacillus flagellatus KT]637939426 YP_546606</i>                                             |                     |                   |                 |                |            |                                               |                     |                   |                 |                |                        |           |                |   |                   |  |
| <b>MFLA2501</b> |                                                                                                                                 | 0.000               | 0.000             |                 |                |            |                                               | 0.000               | 0.000             |                 |                |                        |           |                |   |                   |  |
|                 | <i>lipoic acid synthetase [Methylobacillus flagellatus KT]637939427 YP_546607</i>                                               |                     |                   |                 |                |            |                                               |                     |                   |                 |                |                        |           |                |   |                   |  |
| <b>MFLA2502</b> | 3.619                                                                                                                           | 3.505               | 4.563             | 0.063           | Y              | ●●         | Y                                             | 6.47 E-2            | 21.055            | 22.420          | 22.893         | -1.562                 | Y         | ●              |   |                   |  |
|                 | <i>protein of unknown function DUF21 [Methylobacillus flagellatus KT]637939428 YP_546608</i>                                    |                     |                   |                 |                |            |                                               |                     |                   |                 |                |                        |           |                |   |                   |  |
| <b>MFLA2503</b> | 4.933                                                                                                                           | 4.800               | 5.868             | 0.130           | Y              | ●●         | Y                                             | 9.14 E-2            | 23.720            | 24.087          | 24.915         | -0.425                 | Y         | ●              |   |                   |  |
|                 | <i>" Ubiquinone biosynthesis hydroxylase, UbiH/UbiF/VisC/COQ6 family [Methylobacillus flagellatus KT]637939429 YP_546609 ""</i> |                     |                   |                 |                |            |                                               |                     |                   |                 |                |                        |           |                |   |                   |  |
| <b>MFLA2504</b> | 0.000                                                                                                                           | 0.000               |                   |                 |                |            |                                               | 0.000               | 0.000             |                 |                |                        |           |                |   |                   |  |
|                 | <i>" pyridoxamine 5'-phosphate oxidase-related, FMN-binding [Methylobacillus flagellatus KT]637939430 YP_546610 ""</i>          |                     |                   |                 |                |            |                                               |                     |                   |                 |                |                        |           |                |   |                   |  |
| <b>MFLA2505</b> | 6.96 E-6                                                                                                                        | 5.820               | 4.635             | 6.346           | 1.156          | R          | ●●                                            | Y                   | 2.93 E-2          | 25.262          | 23.940         | 25.748                 | 1.296     | R              | ● |                   |  |
|                 | <i>NADPH-dependent FMN reductase [Methylobacillus flagellatus KT]637939431 YP_546611</i>                                        |                     |                   |                 |                |            |                                               |                     |                   |                 |                |                        |           |                |   |                   |  |
| <b>MFLA2506</b> | 1.521                                                                                                                           |                     | 1.521             |                 | Y              | ●●         | Y                                             | 18.032              |                   | 18.032          |                |                        | Y         | ●              |   |                   |  |
|                 | <i>histidine triad (HIT) protein [Methylobacillus flagellatus KT]637939432 YP_546612</i>                                        |                     |                   |                 |                |            |                                               |                     |                   |                 |                |                        |           |                |   |                   |  |
| <b>MFLA2507</b> | 3.996                                                                                                                           | 4.722               | 5.404             | -0.702          | Y              | ●●         | Y                                             | 8.56 E-2            | 22.659            | 22.759          | 23.710         | -0.097                 | Y         | ●              |   |                   |  |
|                 | <i>TonB-like protein [Methylobacillus flagellatus KT]637939433 YP_546613</i>                                                    |                     |                   |                 |                |            |                                               |                     |                   |                 |                |                        |           |                |   |                   |  |
| <b>MFLA2508</b> | 3.692                                                                                                                           | 4.271               | 5.011             | -0.605          | Y              | ●●         | Y                                             | 5.48 E-2            | 21.612            | 22.678          | 23.241         | -1.522                 | Y         | ●              |   |                   |  |
|                 | <i>UDP-N-acetylmuramate [Methylobacillus flagellatus KT]637939434 YP_546614</i>                                                 |                     |                   |                 |                |            |                                               |                     |                   |                 |                |                        |           |                |   |                   |  |
| <b>MFLA2509</b> | 5.786                                                                                                                           | 6.409               | 7.131             | -0.837          | Y              | ●●         | Y                                             | 7.45 E-2            | 24.339            | 25.558          | 26.073         | -1.884                 | Y         | ●              |   |                   |  |
|                 | <i>5-methyltetrahydrofolate--homocysteine methyltransferase [Methylobacillus flagellatus KT]637939435 YP_546615</i>             |                     |                   |                 |                |            |                                               |                     |                   |                 |                |                        |           |                |   |                   |  |
| <b>MFLA2510</b> | 4.860                                                                                                                           | 4.125               | 5.539             | 0.847           | Y              | ●●         | Y                                             | 2.02 E-1            | 22.586            | 22.909          | 23.756         | 0.028                  | Y         | ●              |   |                   |  |
|                 | <i>Mg chelatase-related protein [Methylobacillus flagellatus KT]637939436 YP_546616</i>                                         |                     |                   |                 |                |            |                                               |                     |                   |                 |                |                        |           |                |   |                   |  |
| <b>MFLA2511</b> | 3.093                                                                                                                           | 3.669               | 4.410             | -0.591          | Y              | ●●         | Y                                             | 1.71 E-1            | 22.667            | 23.334          | 24.038         | -1.332                 | Y         | ●              |   |                   |  |
|                 | <i>protein of unknown function DUF526 [Methylobacillus flagellatus KT]637939437 YP_546617</i>                                   |                     |                   |                 |                |            |                                               |                     |                   |                 |                |                        |           |                |   |                   |  |
| <b>MFLA2512</b> | 0.000                                                                                                                           | 0.000               |                   |                 |                |            |                                               | 0.000               | 0.000             |                 |                |                        |           |                |   |                   |  |
|                 | <i>hypothetical protein [Methylobacillus flagellatus KT]637939438 YP_546618</i>                                                 |                     |                   |                 |                |            |                                               |                     |                   |                 |                |                        |           |                |   |                   |  |
| <b>MFLA2513</b> | 0.000                                                                                                                           | 0.000               |                   |                 |                |            |                                               | 0.000               | 0.000             |                 |                |                        |           |                |   |                   |  |
|                 | <i>" nitrogen regulatory protein P-II (GlnB, GlnK) [Methylobacillus flagellatus KT]637939439 YP_546619 ""</i>                   |                     |                   |                 |                |            |                                               |                     |                   |                 |                |                        |           |                |   |                   |  |
| <b>MFLA2514</b> | 0.000                                                                                                                           | 0.000               |                   |                 |                |            |                                               | 0.000               | 0.000             |                 |                |                        |           |                |   |                   |  |
|                 | <i>ammonium transporter [Methylobacillus flagellatus KT]637939440 YP_546620</i>                                                 |                     |                   |                 |                |            |                                               |                     |                   |                 |                |                        |           |                |   |                   |  |
| <b>MFLA2515</b> | 0.000                                                                                                                           | 0.000               |                   |                 |                |            |                                               | 0.000               | 0.000             |                 |                |                        |           |                |   |                   |  |
|                 | <i>hypothetical protein [Methylobacillus flagellatus KT]637939441 YP_546621</i>                                                 |                     |                   |                 |                |            |                                               |                     |                   |                 |                |                        |           |                |   |                   |  |
| <b>MFLA2516</b> | 4.832                                                                                                                           | 4.656               | 5.747             | 0.125           | Y              | ●●         | Y                                             | 2.51 E-2            | 22.878            | 24.200          | 24.685         | -1.549                 | Y         | ●              |   |                   |  |
|                 | <i>Glutamate--cysteine ligase GshA [Methylobacillus flagellatus KT]637939442 YP_546622</i>                                      |                     |                   |                 |                |            |                                               |                     |                   |                 |                |                        |           |                |   |                   |  |
| <b>MFLA2517</b> | 4.55 E-3                                                                                                                        | 5.783               | 5.034             | 6.456           | 0.751          | R          | ●●                                            | Y                   | 2.7 E-1           | 23.883          | 23.894         | 24.889                 | -0.008    | Y              | ● |                   |  |
|                 | <i>glutathione synthetase [Methylobacillus flagellatus KT]637939443 YP_546623</i>                                               |                     |                   |                 |                |            |                                               |                     |                   |                 |                |                        |           |                |   |                   |  |
| <b>MFLA2518</b> | 7.696                                                                                                                           | 6.563               | 8.238             | 0.873           | Y              | ●●         | Y                                             | 1.13 E-1            | 26.984            | 25.955          | 27.559         | 0.655                  | Y         | ●              |   |                   |  |
|                 | <i>Tfp pilus assembly protein tip-associated adhesin PliY1-like protein [Methylobacillus flagellatus KT]637939444 YP_546624</i> |                     |                   |                 |                |            |                                               |                     |                   |                 |                |                        |           |                |   |                   |  |
| <b>MFLA2519</b> | 2.398                                                                                                                           |                     | 2.398             |                 | Y              | ●●         | Y                                             | 19.488              |                   | 19.488          |                |                        | Y         | ●              |   |                   |  |
|                 | <i>hypothetical protein [Methylobacillus flagellatus KT]637939445 YP_546625</i>                                                 |                     |                   |                 |                |            |                                               |                     |                   |                 |                |                        |           |                |   |                   |  |
| <b>MFLA2520</b> | 0.000                                                                                                                           | 0.000               |                   |                 |                |            |                                               | 0.000               | 0.000             |                 |                |                        |           |                |   |                   |  |
|                 | <i>hypothetical protein [Methylobacillus flagellatus KT]637939446 YP_546626</i>                                                 |                     |                   |                 |                |            |                                               |                     |                   |                 |                |                        |           |                |   |                   |  |
| <b>MFLA2521</b> | 0.000                                                                                                                           | 0.000               |                   |                 |                |            |                                               | 0.000               | 0.000             |                 |                |                        |           |                |   |                   |  |
|                 | <i>hypothetical protein [Methylobacillus flagellatus KT]637939447 YP_546627</i>                                                 |                     |                   |                 |                |            |                                               |                     |                   |                 |                |                        |           |                |   |                   |  |

| ORF             | AM/OH <i>M. Flagellatus</i> Spectral Count                                                                                        |                              |                           |                         |                        |            | AM/OH <i>M. Flagellatus</i> Protein Intensity |                              |                           |                         |                        |           | Spectral Count         |  | Protein Intensity |  |
|-----------------|-----------------------------------------------------------------------------------------------------------------------------------|------------------------------|---------------------------|-------------------------|------------------------|------------|-----------------------------------------------|------------------------------|---------------------------|-------------------------|------------------------|-----------|------------------------|--|-------------------|--|
|                 | q-value                                                                                                                           | log <sub>2</sub> Methylamine | log <sub>2</sub> Methanol | log <sub>2</sub> Sc Sum | log <sub>2</sub> Ratio | Regulation | q-value                                       | log <sub>2</sub> Methylamine | log <sub>2</sub> Methanol | log <sub>2</sub> PI Sum | log <sub>2</sub> Ratio | Consensus | Log <sub>2</sub> Ratio |  |                   |  |
| <b>MFLA2522</b> |                                                                                                                                   |                              | 0.000                     | 0.000                   |                        | Y ●● Y     |                                               |                              | 25.444                    | 25.444                  |                        | Y ●       |                        |  |                   |  |
|                 | <i>methylation [Methylobacillus flagellatus KT]637939448 YP_546628</i>                                                            |                              |                           |                         |                        |            |                                               |                              |                           |                         |                        |           |                        |  |                   |  |
| <b>MFLA2523</b> | 2.813                                                                                                                             | 3.422                        | 4.150                     | 0.394                   | Y ●● Y                 | 1.43 E-2   | 23.604                                        | 24.156                       | 24.906                    | 0.448                   | Y ●                    |           |                        |  |                   |  |
|                 | <i>methylation [Methylobacillus flagellatus KT]637939449 YP_546629</i>                                                            |                              |                           |                         |                        |            |                                               |                              |                           |                         |                        |           |                        |  |                   |  |
| <b>MFLA2524</b> | 0                                                                                                                                 | 8.169                        | 9.723                     | 10.146                  | -1.629                 | G ●● Y     | 1.11 E-2                                      | 28.687                       | 29.527                    | 30.167                  | -0.861                 | G ●       |                        |  |                   |  |
|                 | <i>conserved hypothetical protein-putative formaldehyde-activating enzyme [Methylobacillus flagellatus KT]637939450 YP_546630</i> |                              |                           |                         |                        |            |                                               |                              |                           |                         |                        |           |                        |  |                   |  |
| <b>MFLA2525</b> | 1.521                                                                                                                             | 0.346                        | 2.050                     | 1.174                   | Y ●● Y                 |            | 19.918                                        | 19.646                       | 20.788                    | 0.272                   | Y ●                    |           |                        |  |                   |  |
|                 | <i>A/G-specific adenine glycosylase [Methylobacillus flagellatus KT]637939451 YP_546631</i>                                       |                              |                           |                         |                        |            |                                               |                              |                           |                         |                        |           |                        |  |                   |  |
| <b>MFLA2526</b> | 4.11 E-2                                                                                                                          | 7.258                        | 6.978                     | 8.125                   | 0.280                  | Y ●● Y     | 1.26 E-1                                      | 25.870                       | 26.117                    | 26.999                  | -0.237                 | Y ●       |                        |  |                   |  |
|                 | <i>AsmA [Methylobacillus flagellatus KT]637939452 YP_546632</i>                                                                   |                              |                           |                         |                        |            |                                               |                              |                           |                         |                        |           |                        |  |                   |  |
| <b>MFLA2527</b> | 0.000                                                                                                                             | 0.000                        |                           |                         |                        |            | 0.000                                         | 0.000                        |                           |                         |                        |           |                        |  |                   |  |
|                 | <i>" undecaprenol kinase, putative [Methylobacillus flagellatus KT]637939453 YP_546633 ""</i>                                     |                              |                           |                         |                        |            |                                               |                              |                           |                         |                        |           |                        |  |                   |  |
| <b>MFLA2528</b> | 3.482                                                                                                                             | 3.729                        | 4.611                     | -0.210                  | Y ●● Y                 | 4.79 E-2   | 23.165                                        | 24.785                       | 25.191                    | -1.495                  | Y ●                    |           |                        |  |                   |  |
|                 | <i>hypothetical protein [Methylobacillus flagellatus KT]637939454 YP_546634</i>                                                   |                              |                           |                         |                        |            |                                               |                              |                           |                         |                        |           |                        |  |                   |  |
| <b>MFLA2529</b> | 3.408                                                                                                                             | 3.962                        | 4.712                     | -0.541                  | Y ●● Y                 | 2.42 E-1   | 22.503                                        | 22.361                       | 23.434                    | 0.128                   | Y ●                    |           |                        |  |                   |  |
|                 | <i>" Pseudouridine synthase, Rsu [Methylobacillus flagellatus KT]637939455 YP_546635 ""</i>                                       |                              |                           |                         |                        |            |                                               |                              |                           |                         |                        |           |                        |  |                   |  |
| <b>MFLA2530</b> | 7.597                                                                                                                             | 7.791                        | 8.697                     | -0.417                  | Y ●● Y                 | 1.89 E-2   | 26.363                                        | 28.030                       | 28.425                    | -1.715                  | Y ●                    |           |                        |  |                   |  |
|                 | <i>thiamine biosynthesis protein ThiC [Methylobacillus flagellatus KT]637939456 YP_546636</i>                                     |                              |                           |                         |                        |            |                                               |                              |                           |                         |                        |           |                        |  |                   |  |
| <b>MFLA2531</b> | 5.42 E-8                                                                                                                          | 5.905                        | 4.509                     | 6.369                   | 1.436                  | R ●● Y     | 4.98 E-2                                      | 24.918                       | 22.533                    | 25.171                  | 2.211                  | R ●       |                        |  |                   |  |
|                 | <i>protein-L-isoaspartate(D-aspartate) O-methyltransferase [Methylobacillus flagellatus KT]637939457 YP_546637</i>                |                              |                           |                         |                        |            |                                               |                              |                           |                         |                        |           |                        |  |                   |  |
| <b>MFLA2532</b> | 3.235                                                                                                                             | 3.295                        | 4.265                     | -0.027                  | Y ●● Y                 | 1.28 E-1   | 21.519                                        | 20.936                       | 22.257                    | 0.664                   | Y ●                    |           |                        |  |                   |  |
|                 | <i>secretion protein HlyD [Methylobacillus flagellatus KT]637939458 YP_546638</i>                                                 |                              |                           |                         |                        |            |                                               |                              |                           |                         |                        |           |                        |  |                   |  |
| <b>MFLA2533</b> | 3.952                                                                                                                             | 3.032                        | 4.564                     | 0.926                   | Y ●● Y                 | 2.34 E-1   | 22.081                                        | 22.224                       | 23.154                    | 0.019                   | Y ●                    |           |                        |  |                   |  |
|                 | <i>acriflavin resistance protein [Methylobacillus flagellatus KT]637939459 YP_546639</i>                                          |                              |                           |                         |                        |            |                                               |                              |                           |                         |                        |           |                        |  |                   |  |
| <b>MFLA2534</b> | 4.186                                                                                                                             | 3.032                        | 4.721                     | 1.029                   | Y ●● Y                 | 6.44 E-2   | 23.734                                        | 22.168                       | 24.154                    | 1.512                   | Y ●                    |           |                        |  |                   |  |
|                 | <i>" Type I secretion outer membrane protein, TolC [Methylobacillus flagellatus KT]637939460 YP_546640 ""</i>                     |                              |                           |                         |                        |            |                                               |                              |                           |                         |                        |           |                        |  |                   |  |
| <b>MFLA2535</b> | 0.813                                                                                                                             | 1.585                        | 2.250                     | -0.772                  | Y ●● Y                 |            | 21.390                                        | 20.508                       | 22.015                    | 0.882                   | Y ●                    |           |                        |  |                   |  |
|                 | <i>isochorismatase hydrolase [Methylobacillus flagellatus KT]637939461 YP_546641</i>                                              |                              |                           |                         |                        |            |                                               |                              |                           |                         |                        |           |                        |  |                   |  |
| <b>MFLA2536</b> |                                                                                                                                   | 2.897                        | 2.897                     |                         |                        | Y ●● Y     |                                               | 20.825                       | 20.825                    |                         |                        | Y ●       |                        |  |                   |  |
|                 | <i>Three-deoxy-D-manno-octulosonic-acid transferase-like protein [Methylobacillus flagellatus KT]637939462 YP_546642</i>          |                              |                           |                         |                        |            |                                               |                              |                           |                         |                        |           |                        |  |                   |  |
| <b>MFLA2537</b> |                                                                                                                                   | 0.346                        | 0.346                     |                         |                        | Y ●● Y     |                                               | 20.241                       | 20.241                    |                         |                        | Y ●       |                        |  |                   |  |
|                 | <i>periplasmic sensor signal transduction histidine kinase [Methylobacillus flagellatus KT]637939463 YP_546643</i>                |                              |                           |                         |                        |            |                                               |                              |                           |                         |                        |           |                        |  |                   |  |
| <b>MFLA2538</b> | 0.000                                                                                                                             | 0.000                        |                           |                         |                        |            | 0.000                                         | 0.000                        |                           |                         |                        |           |                        |  |                   |  |
|                 | <i>" two component transcriptional regulator, winged helix family [Methylobacillus flagellatus KT]637939464 YP_546644 ""</i>      |                              |                           |                         |                        |            |                                               |                              |                           |                         |                        |           |                        |  |                   |  |
| <b>MFLA2539</b> | 0.000                                                                                                                             | 0.000                        |                           |                         |                        |            | 0.000                                         | 0.000                        |                           |                         |                        |           |                        |  |                   |  |
|                 | <i>Outer membrane autotransporter barrel [Methylobacillus flagellatus KT]637939465 YP_546645</i>                                  |                              |                           |                         |                        |            |                                               |                              |                           |                         |                        |           |                        |  |                   |  |
| <b>MFLA2540</b> | 4.587                                                                                                                             | 3.254                        | 5.069                     | 1.336                   | Y ●● R                 | 7.12 E-3   | 23.885                                        | 22.240                       | 24.285                    | 1.671                   | R ●                    |           |                        |  |                   |  |
|                 | <i>isochorismatase hydrolase [Methylobacillus flagellatus KT]637939466 YP_546646</i>                                              |                              |                           |                         |                        |            |                                               |                              |                           |                         |                        |           |                        |  |                   |  |
| <b>MFLA2541</b> | 0                                                                                                                                 | 5.927                        | 7.806                     | 8.153                   | -1.920                 | G ●● Y     | 1.53 E-2                                      | 24.111                       | 27.078                    | 27.252                  | -3.112                 | G ●       |                        |  |                   |  |
|                 | <i>Ribonucleoside-diphosphate reductase [Methylobacillus flagellatus KT]637939467 YP_546647</i>                                   |                              |                           |                         |                        |            |                                               |                              |                           |                         |                        |           |                        |  |                   |  |
| <b>MFLA2542</b> | 0                                                                                                                                 | 4.299                        | 6.283                     | 6.608                   | -2.792                 | G ●● Y     | 2.54 E-2                                      | 23.463                       | 25.996                    | 26.226                  | -2.912                 | G ●       |                        |  |                   |  |
|                 | <i>hypothetical protein [Methylobacillus flagellatus KT]637939468 YP_546648</i>                                                   |                              |                           |                         |                        |            |                                               |                              |                           |                         |                        |           |                        |  |                   |  |
| <b>MFLA2543</b> | 3.461                                                                                                                             | 4.191                        | 4.872                     | -0.725                  | Y ●● Y                 | 1.05 E-1   | 22.864                                        | 23.294                       | 24.095                    | -0.557                  | Y ●                    |           |                        |  |                   |  |
|                 | <i>formaldehyde-activating enzyme [Methylobacillus flagellatus KT]637939469 YP_546649</i>                                         |                              |                           |                         |                        |            |                                               |                              |                           |                         |                        |           |                        |  |                   |  |



AM/OH M *Flagellatus* Spectral Count

AM/OH M *Flagellatus* Protein Intensity

| ORF             | AM/OH M <i>Flagellatus</i> Spectral Count                                                                                |                              |                           |                         |                        |            | AM/OH M <i>Flagellatus</i> Protein Intensity |                              |                           |                         |                        |   | Consensus | Log <sub>2</sub> Ratio |
|-----------------|--------------------------------------------------------------------------------------------------------------------------|------------------------------|---------------------------|-------------------------|------------------------|------------|----------------------------------------------|------------------------------|---------------------------|-------------------------|------------------------|---|-----------|------------------------|
|                 | q-value                                                                                                                  | log <sub>2</sub> Methylamine | log <sub>2</sub> Methanol | log <sub>2</sub> Sc Sum | log <sub>2</sub> Ratio | Regulation | q-value                                      | log <sub>2</sub> Methylamine | log <sub>2</sub> Methanol | log <sub>2</sub> PI Sum | log <sub>2</sub> Ratio |   |           |                        |
| <b>MFLA2544</b> |                                                                                                                          | 0.000                        | 0.000                     |                         |                        | ■ ■        |                                              | 0.000                        | 0.000                     |                         |                        | ■ |           |                        |
|                 | " RND efflux system, outer membrane lipoprotein, NodT [Methylobacillus flagellatus KT]637939470 YP_546650 ""             |                              |                           |                         |                        |            |                                              |                              |                           |                         |                        |   |           |                        |
| <b>MFLA2545</b> |                                                                                                                          | 0.000                        | 0.000                     |                         |                        | ■ ■        |                                              | 0.000                        | 0.000                     |                         |                        | ■ |           |                        |
|                 | RND multidrug efflux transporter MexB [Methylobacillus flagellatus KT]637939471 YP_546651                                |                              |                           |                         |                        |            |                                              |                              |                           |                         |                        |   |           |                        |
| <b>MFLA2546</b> |                                                                                                                          | 0.000                        | 0.000                     |                         |                        | ■ ■        |                                              | 0.000                        | 0.000                     |                         |                        | ■ |           |                        |
|                 | Cation/multidrug efflux pump-like protein [Methylobacillus flagellatus KT]637939472 YP_546652                            |                              |                           |                         |                        |            |                                              |                              |                           |                         |                        |   |           |                        |
| <b>MFLA2547</b> |                                                                                                                          | 0.000                        | 0.000                     |                         |                        | ■ ■        |                                              | 0.000                        | 0.000                     |                         |                        | ■ |           |                        |
|                 | IstB-like ATP-binding protein [Methylobacillus flagellatus KT]637939473 YP_546653                                        |                              |                           |                         |                        |            |                                              |                              |                           |                         |                        |   |           |                        |
| <b>MFLA2548</b> |                                                                                                                          | 0.000                        | 0.000                     |                         |                        | ■ ■        |                                              | 0.000                        | 0.000                     |                         |                        | ■ |           |                        |
|                 | " Integrase, catalytic region [Methylobacillus flagellatus KT]637939474 YP_546654 ""                                     |                              |                           |                         |                        |            |                                              |                              |                           |                         |                        |   |           |                        |
| <b>MFLA2549</b> |                                                                                                                          | 0.000                        | 0.000                     |                         |                        | ■ ■        |                                              | 0.000                        | 0.000                     |                         |                        | ■ |           |                        |
|                 | hypothetical protein [Methylobacillus flagellatus KT]637939475 YP_546655                                                 |                              |                           |                         |                        |            |                                              |                              |                           |                         |                        |   |           |                        |
| <b>MFLA2550</b> |                                                                                                                          |                              | 0.585                     | 0.585                   |                        | Y ● ● Y    |                                              |                              |                           | 18.431                  | 18.431                 |   | Y ●       |                        |
|                 | Heavy metal translocating P-type ATPase [Methylobacillus flagellatus KT]637939476 YP_546656                              |                              |                           |                         |                        |            |                                              |                              |                           |                         |                        |   |           |                        |
| <b>MFLA2551</b> |                                                                                                                          | 2.746                        |                           | 2.746                   |                        | Y ● ● Y    |                                              | 21.040                       |                           | 21.040                  |                        |   | Y ●       |                        |
|                 | Heavy metal efflux pump CzcA [Methylobacillus flagellatus KT]637939477 YP_546657                                         |                              |                           |                         |                        |            |                                              |                              |                           |                         |                        |   |           |                        |
| <b>MFLA2552</b> |                                                                                                                          | 0.000                        | 0.000                     |                         |                        | ■ ■        |                                              | 0.000                        | 0.000                     |                         |                        | ■ |           |                        |
|                 | secretion protein HlyD [Methylobacillus flagellatus KT]637939478 YP_546658                                               |                              |                           |                         |                        |            |                                              |                              |                           |                         |                        |   |           |                        |
| <b>MFLA2553</b> |                                                                                                                          | 0.000                        | 0.000                     |                         |                        | ■ ■        |                                              | 0.000                        | 0.000                     |                         |                        | ■ |           |                        |
|                 | outer membrane efflux protein [Methylobacillus flagellatus KT]637939479 YP_546659                                        |                              |                           |                         |                        |            |                                              |                              |                           |                         |                        |   |           |                        |
| <b>MFLA2554</b> |                                                                                                                          | 0.000                        | 0.000                     |                         |                        | ■ ■        |                                              | 0.000                        | 0.000                     |                         |                        | ■ |           |                        |
|                 | protein of unknown function UPF0060 [Methylobacillus flagellatus KT]637939480 YP_546660                                  |                              |                           |                         |                        |            |                                              |                              |                           |                         |                        |   |           |                        |
| <b>MFLA2555</b> |                                                                                                                          | 0.000                        | 0.000                     |                         |                        | ■ ■        |                                              | 0.000                        | 0.000                     |                         |                        | ■ |           |                        |
|                 | hypothetical protein [Methylobacillus flagellatus KT]637939481 YP_546661                                                 |                              |                           |                         |                        |            |                                              |                              |                           |                         |                        |   |           |                        |
| <b>MFLA2556</b> |                                                                                                                          | 0.000                        | 0.000                     |                         |                        | ■ ■        |                                              | 0.000                        | 0.000                     |                         |                        | ■ |           |                        |
|                 | RND multidrug efflux transporter MexB [Methylobacillus flagellatus KT]637939482 YP_546662                                |                              |                           |                         |                        |            |                                              |                              |                           |                         |                        |   |           |                        |
| <b>MFLA2557</b> |                                                                                                                          | 0.000                        | 0.000                     |                         |                        | ■ ■        |                                              | 0.000                        | 0.000                     |                         |                        | ■ |           |                        |
|                 | secretion protein HlyD [Methylobacillus flagellatus KT]637939483 YP_546663                                               |                              |                           |                         |                        |            |                                              |                              |                           |                         |                        |   |           |                        |
| <b>MFLA2558</b> |                                                                                                                          | 3.700                        | 3.754                     | 4.728                   | -0.133                 | Y ● ● Y    | 7.54 E-2                                     | 22.640                       | 23.231                    | 23.966                  | -0.711                 |   | Y ●       |                        |
|                 | " transcriptional regulator, IclR family [Methylobacillus flagellatus KT]637939484 YP_546664 ""                          |                              |                           |                         |                        |            |                                              |                              |                           |                         |                        |   |           |                        |
| <b>MFLA2559</b> |                                                                                                                          | 0.000                        | 0.000                     |                         |                        | ■ ■        |                                              | 0.000                        | 0.000                     |                         |                        | ■ |           |                        |
|                 | binding-protein-dependent transport systems inner membrane component [Methylobacillus flagellatus KT]637939485 YP_546665 |                              |                           |                         |                        |            |                                              |                              |                           |                         |                        |   |           |                        |
| <b>MFLA2560</b> |                                                                                                                          | 0.000                        | 0.000                     |                         |                        | ■ ■        |                                              | 0.000                        | 0.000                     |                         |                        | ■ |           |                        |
|                 | ABC transporter related [Methylobacillus flagellatus KT]637939486 YP_546666                                              |                              |                           |                         |                        |            |                                              |                              |                           |                         |                        |   |           |                        |
| <b>MFLA2561</b> |                                                                                                                          | 0.000                        | 0.000                     |                         |                        | ■ ■        |                                              | 0.000                        | 0.000                     |                         |                        | ■ |           |                        |
|                 | NLPA lipoprotein [Methylobacillus flagellatus KT]637939487 YP_546667                                                     |                              |                           |                         |                        |            |                                              |                              |                           |                         |                        |   |           |                        |
| <b>MFLA2562</b> |                                                                                                                          | 0.000                        | 0.000                     |                         |                        | ■ ■        |                                              | 0.000                        | 0.000                     |                         |                        | ■ |           |                        |
|                 | Glutamate--ammonia ligase [Methylobacillus flagellatus KT]637939488 YP_546668                                            |                              |                           |                         |                        |            |                                              |                              |                           |                         |                        |   |           |                        |
| <b>MFLA2563</b> |                                                                                                                          |                              | 1.184                     | 1.184                   |                        | Y ● ● Y    |                                              |                              | 19.966                    | 19.966                  |                        |   | Y ●       |                        |
|                 | Homoserine O-acetyltransferase [Methylobacillus flagellatus KT]637939489 YP_546669                                       |                              |                           |                         |                        |            |                                              |                              |                           |                         |                        |   |           |                        |
| <b>MFLA2564</b> |                                                                                                                          | 2.259                        | 2.649                     | 3.467                   | -0.082                 | Y ● ● Y    | 5.48 E-2                                     | 22.200                       | 20.950                    | 22.707                  | 1.139                  |   | Y ●       |                        |
|                 | " transcriptional regulator, TetR family [Methylobacillus flagellatus KT]637939490 YP_546670 ""                          |                              |                           |                         |                        |            |                                              |                              |                           |                         |                        |   |           |                        |
| <b>MFLA2565</b> |                                                                                                                          | 0.000                        | 0.000                     |                         |                        | ■ ■        |                                              | 0.000                        | 0.000                     |                         |                        | ■ |           |                        |
|                 | hypothetical protein [Methylobacillus flagellatus KT]637939491 YP_546671                                                 |                              |                           |                         |                        |            |                                              |                              |                           |                         |                        |   |           |                        |

| ORF             | AM/OH <i>M. Flagellatus</i> Spectral Count                                                                                                |                      |                   |                 |                |            | AM/OH <i>M. Flagellatus</i> Protein Intensity |                      |                   |                 |                |           | Spectral Count         |   | Protein Intensity |  |
|-----------------|-------------------------------------------------------------------------------------------------------------------------------------------|----------------------|-------------------|-----------------|----------------|------------|-----------------------------------------------|----------------------|-------------------|-----------------|----------------|-----------|------------------------|---|-------------------|--|
|                 | $q$ -value                                                                                                                                | $\log_2$ Methylamine | $\log_2$ Methanol | $\log_2$ Sc Sum | $\log_2$ Ratio | Regulation | $q$ -value                                    | $\log_2$ Methylamine | $\log_2$ Methanol | $\log_2$ PI Sum | $\log_2$ Ratio | Consensus | Log <sub>2</sub> Ratio |   |                   |  |
| <b>MFLA2566</b> |                                                                                                                                           | 1.521                |                   | 1.521           |                | Y ●● Y     |                                               | 19.530               |                   | 19.530          |                | Y ●       |                        |   |                   |  |
|                 | <i>Heavy metal efflux pump CzcA [Methylobacillus flagellatus KT]637939492 YP_546672</i>                                                   |                      |                   |                 |                |            |                                               |                      |                   |                 |                |           |                        |   |                   |  |
| <b>MFLA2567</b> |                                                                                                                                           | 0.521                | 2.322             | 2.686           | -1.801         | Y ●● Y     |                                               | 18.839               | 20.601            | 20.974          | -1.762         | Y ●       |                        | ● |                   |  |
|                 | <i>secretion protein HlyD [Methylobacillus flagellatus KT]637939493 YP_546673</i>                                                         |                      |                   |                 |                |            |                                               |                      |                   |                 |                |           |                        |   |                   |  |
| <b>MFLA2568</b> |                                                                                                                                           | 0.000                | 0.000             |                 |                | ■ ■        |                                               | 0.000                | 0.000             |                 |                | ■         |                        |   |                   |  |
|                 | <i>outer membrane efflux protein [Methylobacillus flagellatus KT]637939494 YP_546674</i>                                                  |                      |                   |                 |                |            |                                               |                      |                   |                 |                |           |                        |   |                   |  |
| <b>MFLA2569</b> |                                                                                                                                           | 0.000                | 0.000             |                 |                | ■ ■        |                                               | 0.000                | 0.000             |                 |                | ■         |                        |   |                   |  |
|                 | <i>hypothetical protein [Methylobacillus flagellatus KT]637939495 YP_546675</i>                                                           |                      |                   |                 |                |            |                                               |                      |                   |                 |                |           |                        |   |                   |  |
| <b>MFLA2570</b> |                                                                                                                                           | 0.000                | 0.000             |                 |                | ■ ■        |                                               | 0.000                | 0.000             |                 |                | ■         |                        |   |                   |  |
|                 | <i>" transcriptional regulator, LysR family [Methylobacillus flagellatus KT]637939496 YP_546676 ""</i>                                    |                      |                   |                 |                |            |                                               |                      |                   |                 |                |           |                        |   |                   |  |
| <b>MFLA2571</b> | 0                                                                                                                                         | 9.587                | 10.324            | 11.002          | -0.938         | G ●● Y     | 1.96 E-1                                      | 30.319               | 30.617            | 31.476          | -0.705         | G ●       |                        | ● |                   |  |
|                 | <i>5-methyltetrahydropteroyltrimethylglutamate-- homocysteine S-methyltransferase [Methylobacillus flagellatus KT]637939497 YP_546677</i> |                      |                   |                 |                |            |                                               |                      |                   |                 |                |           |                        |   |                   |  |
| <b>MFLA2572</b> |                                                                                                                                           | 3.744                | 2.889             | 4.379           | 0.718          | Y ●● R     | 9.69 E-3                                      | 22.773               | 20.239            | 23.003          | 3.012          | R ●       |                        | ■ |                   |  |
|                 | <i>Catalase-like protein [Methylobacillus flagellatus KT]637939498 YP_546678</i>                                                          |                      |                   |                 |                |            |                                               |                      |                   |                 |                |           |                        |   |                   |  |
| <b>MFLA2573</b> |                                                                                                                                           | 4.633                | 4.947             | 5.799           | -0.249         | Y ●● Y     | 5.38 E-2                                      | 22.229               | 22.961            | 23.641          | -0.689         | Y ●       |                        | ■ |                   |  |
|                 | <i>isochorismatase hydrolase [Methylobacillus flagellatus KT]637939499 YP_546679</i>                                                      |                      |                   |                 |                |            |                                               |                      |                   |                 |                |           |                        |   |                   |  |
| <b>MFLA2574</b> |                                                                                                                                           | 1.106                | 2.739             | 3.142           | -0.632         | Y ●● Y     | 7.24 E-2                                      | 20.079               | 20.625            | 21.377          | 0.462          | Y ●       |                        | ■ |                   |  |
|                 | <i>Pirin-like protein [Methylobacillus flagellatus KT]637939500 YP_546680</i>                                                             |                      |                   |                 |                |            |                                               |                      |                   |                 |                |           |                        |   |                   |  |
| <b>MFLA2575</b> |                                                                                                                                           |                      | 0.000             | 0.000           |                | Y ●● Y     |                                               |                      | 18.440            | 18.440          |                | Y ●       |                        |   |                   |  |
|                 | <i>" transcriptional regulator, LysR family [Methylobacillus flagellatus KT]637939501 YP_546681 ""</i>                                    |                      |                   |                 |                |            |                                               |                      |                   |                 |                |           |                        |   |                   |  |
| <b>MFLA2576</b> |                                                                                                                                           | 0.000                | 0.000             |                 |                | ■ ■        |                                               | 0.000                | 0.000             |                 |                | ■         |                        |   |                   |  |
|                 | <i>" protein of unknown function DUF6, transmembrane [Methylobacillus flagellatus KT]637939502 YP_546682 ""</i>                           |                      |                   |                 |                |            |                                               |                      |                   |                 |                |           |                        |   |                   |  |
| <b>MFLA2577</b> |                                                                                                                                           | 1.521                |                   | 1.521           |                | Y ●● Y     |                                               | 18.994               |                   | 18.994          |                | Y ●       |                        |   |                   |  |
|                 | <i>FAD-dependent pyridine nucleotide-disulphide oxidoreductase [Methylobacillus flagellatus KT]637939503 YP_546683</i>                    |                      |                   |                 |                |            |                                               |                      |                   |                 |                |           |                        |   |                   |  |
| <b>MFLA2578</b> |                                                                                                                                           | 0.000                | 0.000             |                 |                | ■ ■        |                                               | 0.000                | 0.000             |                 |                | ■         |                        |   |                   |  |
|                 | <i>hypothetical protein [Methylobacillus flagellatus KT]637939504 YP_546684</i>                                                           |                      |                   |                 |                |            |                                               |                      |                   |                 |                |           |                        |   |                   |  |
| <b>MFLA2579</b> | 0                                                                                                                                         | 6.568                | 3.654             | 6.748           | 2.935          | R ●● R     | 7.71 E-3                                      | 24.644               | 22.551            | 24.948          | 2.211          | R ●       |                        | ■ |                   |  |
|                 | <i>hypothetical protein [Methylobacillus flagellatus KT]637939505 YP_546685</i>                                                           |                      |                   |                 |                |            |                                               |                      |                   |                 |                |           |                        |   |                   |  |
| <b>MFLA2580</b> |                                                                                                                                           | 2.328                | 1.807             | 3.091           | 0.521          | Y ●● Y     |                                               | 19.186               | 19.309            | 20.249          | -0.122         | Y ●       |                        | ■ |                   |  |
|                 | <i>" transcriptional regulator, TetR family [Methylobacillus flagellatus KT]637939506 YP_546686 ""</i>                                    |                      |                   |                 |                |            |                                               |                      |                   |                 |                |           |                        |   |                   |  |
| <b>MFLA2581</b> |                                                                                                                                           | 2.328                | 2.516             | 3.425           | -0.188         | Y ●● Y     |                                               | 21.304               | 22.345            | 22.917          | -1.042         | Y ●       |                        | ■ |                   |  |
|                 | <i>" transcriptional regulator, MarR family [Methylobacillus flagellatus KT]637939507 YP_546687 ""</i>                                    |                      |                   |                 |                |            |                                               |                      |                   |                 |                |           |                        |   |                   |  |
| <b>MFLA2582</b> |                                                                                                                                           | 1.106                |                   | 1.106           |                | Y ●● Y     |                                               | 18.410               |                   | 18.410          |                | Y ●       |                        |   |                   |  |
|                 | <i>" RND efflux system, outer membrane lipoprotein, NodT [Methylobacillus flagellatus KT]637939508 YP_546688 ""</i>                       |                      |                   |                 |                |            |                                               |                      |                   |                 |                |           |                        |   |                   |  |
| <b>MFLA2583</b> |                                                                                                                                           | 0.000                | 0.000             |                 |                | ■ ■        |                                               | 0.000                | 0.000             |                 |                | ■         |                        |   |                   |  |
|                 | <i>Fusaric acid resistance protein conserved region [Methylobacillus flagellatus KT]637939509 YP_546689</i>                               |                      |                   |                 |                |            |                                               |                      |                   |                 |                |           |                        |   |                   |  |
| <b>MFLA2584</b> |                                                                                                                                           | 0.000                | 0.000             |                 |                | ■ ■        |                                               | 0.000                | 0.000             |                 |                | ■         |                        |   |                   |  |
|                 | <i>protein of unknown function DUF1656 [Methylobacillus flagellatus KT]637939510 YP_546690</i>                                            |                      |                   |                 |                |            |                                               |                      |                   |                 |                |           |                        |   |                   |  |
| <b>MFLA2585</b> |                                                                                                                                           | 1.521                | 3.919             | 4.170           | -1.399         | Y ●● Y     | 9.64 E-2                                      | 19.169               | 22.183            | 22.352          | -1.920         | Y ●       |                        | ■ |                   |  |
|                 | <i>secretion protein HlyD [Methylobacillus flagellatus KT]637939511 YP_546691</i>                                                         |                      |                   |                 |                |            |                                               |                      |                   |                 |                |           |                        |   |                   |  |
| <b>MFLA2586</b> |                                                                                                                                           | 0.000                | 0.000             |                 |                | ■ ■        |                                               | 0.000                | 0.000             |                 |                | ■         |                        |   |                   |  |
|                 | <i>hypothetical protein [Methylobacillus flagellatus KT]637939512 YP_546692</i>                                                           |                      |                   |                 |                |            |                                               |                      |                   |                 |                |           |                        |   |                   |  |
| <b>MFLA2587</b> | 5.31 E-2                                                                                                                                  | 5.820                | 5.384             | 6.618           | 0.436          | Y ●● Y     | 2.26 E-1                                      | 24.748               | 24.714            | 25.731          | 0.026          | Y ●       |                        | ■ |                   |  |
|                 | <i>multi-sensor hybrid histidine kinase [Methylobacillus flagellatus KT]637939513 YP_546693</i>                                           |                      |                   |                 |                |            |                                               |                      |                   |                 |                |           |                        |   |                   |  |



| ORF             | AM/OH <i>M. Flagellatus</i> Spectral Count                                                                                  |                              |                           |                         |                        |            | AM/OH <i>M. Flagellatus</i> Protein Intensity |                              |                           |                         |                        |                        | Consensus | Spectral Count |   | Protein Intensity |  |
|-----------------|-----------------------------------------------------------------------------------------------------------------------------|------------------------------|---------------------------|-------------------------|------------------------|------------|-----------------------------------------------|------------------------------|---------------------------|-------------------------|------------------------|------------------------|-----------|----------------|---|-------------------|--|
|                 | q-value                                                                                                                     | log <sub>2</sub> Methylamine | log <sub>2</sub> Methanol | log <sub>2</sub> Sc Sum | log <sub>2</sub> Ratio | Regulation | q-value                                       | log <sub>2</sub> Methylamine | log <sub>2</sub> Methanol | log <sub>2</sub> PI Sum | log <sub>2</sub> Ratio | Log <sub>2</sub> Ratio |           | -7             | 0 | 7                 |  |
| <b>MFLA2588</b> |                                                                                                                             | 0.000                        | 0.000                     |                         |                        |            |                                               | 0.000                        | 0.000                     |                         |                        |                        |           |                |   |                   |  |
|                 | " MCP methyltransferase, CheR-type [Methylobacillus flagellatus KT]637939514 YP_546694 ""                                   |                              |                           |                         |                        |            |                                               |                              |                           |                         |                        |                        |           |                |   |                   |  |
| <b>MFLA2589</b> |                                                                                                                             | 0.000                        | 0.000                     |                         |                        |            |                                               | 0.000                        | 0.000                     |                         |                        |                        |           |                |   |                   |  |
|                 | CheB methyltransferase [Methylobacillus flagellatus KT]637939515 YP_546695                                                  |                              |                           |                         |                        |            |                                               |                              |                           |                         |                        |                        |           |                |   |                   |  |
| <b>MFLA2590</b> | 3.106                                                                                                                       | 3.391                        | 4.255                     | 0.799                   | Y                      | ●●         | Y                                             | 7.63 E-2                     | 21.044                    | 21.477                  | 22.277                 | 0.583                  | Y         | ●              |   |                   |  |
|                 | response regulator receiver sensor signal transduction histidine kinase [Methylobacillus flagellatus KT]637939516 YP_546696 |                              |                           |                         |                        |            |                                               |                              |                           |                         |                        |                        |           |                |   |                   |  |
| <b>MFLA2591</b> | 5.82 E-2                                                                                                                    | 6.366                        | 6.510                     | 7.440                   | -0.145                 | Y          | ●●                                            | Y                            | 4.29 E-2                  | 25.858                  | 26.755                 | 27.375                 | -0.849    | Y              | ● |                   |  |
|                 | short-chain dehydrogenase/reductase SDR [Methylobacillus flagellatus KT]637939517 YP_546697                                 |                              |                           |                         |                        |            |                                               |                              |                           |                         |                        |                        |           |                |   |                   |  |
| <b>MFLA2592</b> |                                                                                                                             | 0.000                        | 0.000                     |                         |                        |            |                                               | 0.000                        | 0.000                     |                         |                        |                        |           |                |   |                   |  |
|                 | " transcriptional regulator, LysR family [Methylobacillus flagellatus KT]637939518 YP_546698 ""                             |                              |                           |                         |                        |            |                                               |                              |                           |                         |                        |                        |           |                |   |                   |  |
| <b>MFLA2593</b> |                                                                                                                             | 0.000                        | 0.000                     |                         |                        |            |                                               | 0.000                        | 0.000                     |                         |                        |                        |           |                |   |                   |  |
|                 | hypothetical protein [Methylobacillus flagellatus KT]637939519 YP_546699                                                    |                              |                           |                         |                        |            |                                               |                              |                           |                         |                        |                        |           |                |   |                   |  |
| <b>MFLA2594</b> | 3.930                                                                                                                       | 1.540                        | 4.182                     | 2.447                   | Y                      | ●●         | Y                                             | 7.09 E-2                     | 22.377                    | 21.096                  | 22.874                 | 1.100                  | Y         | ●              |   |                   |  |
|                 | Uracil-DNA glycosylase superfamily [Methylobacillus flagellatus KT]637939520 YP_546700                                      |                              |                           |                         |                        |            |                                               |                              |                           |                         |                        |                        |           |                |   |                   |  |
| <b>MFLA2595</b> |                                                                                                                             | 0.000                        | 0.000                     |                         |                        |            |                                               | 0.000                        | 0.000                     |                         |                        |                        |           |                |   |                   |  |
|                 | hypothetical protein [Methylobacillus flagellatus KT]637939521 YP_546701                                                    |                              |                           |                         |                        |            |                                               |                              |                           |                         |                        |                        |           |                |   |                   |  |
| <b>MFLA2596</b> |                                                                                                                             | 0.000                        | 0.000                     |                         |                        |            |                                               | 0.000                        | 0.000                     |                         |                        |                        |           |                |   |                   |  |
|                 | proline-rich region [Methylobacillus flagellatus KT]637939522 YP_546702                                                     |                              |                           |                         |                        |            |                                               |                              |                           |                         |                        |                        |           |                |   |                   |  |
| <b>MFLA2597</b> |                                                                                                                             | 0.000                        | 0.000                     |                         |                        |            |                                               | 0.000                        | 0.000                     |                         |                        |                        |           |                |   |                   |  |
|                 | hypothetical protein [Methylobacillus flagellatus KT]637939523 YP_546703                                                    |                              |                           |                         |                        |            |                                               |                              |                           |                         |                        |                        |           |                |   |                   |  |
| <b>MFLA2598</b> |                                                                                                                             | 0.000                        | 0.000                     |                         |                        |            |                                               | 0.000                        | 0.000                     |                         |                        |                        |           |                |   |                   |  |
|                 | hypothetical protein [Methylobacillus flagellatus KT]637939524 YP_546704                                                    |                              |                           |                         |                        |            |                                               |                              |                           |                         |                        |                        |           |                |   |                   |  |
| <b>MFLA2599</b> | 0                                                                                                                           | 7.004                        | 3.523                     | 7.128                   | 3.393                  | R          | ●●                                            | R                            | 8.35 E-3                  | 25.735                  | 21.215                 | 25.796                 | 4.504     | R              | ● |                   |  |
|                 | " 6-phosphogluconate dehydrogenase, decarboxylating [Methylobacillus flagellatus KT]637939525 YP_546705 ""                  |                              |                           |                         |                        |            |                                               |                              |                           |                         |                        |                        |           |                |   |                   |  |
| <b>MFLA2600</b> |                                                                                                                             |                              | 3.540                     | 3.540                   |                        | Y          | ●●                                            | Y                            |                           |                         | 22.592                 | 22.592                 |           | Y              | ● |                   |  |
|                 | hypothetical protein [Methylobacillus flagellatus KT]637939526 YP_546706                                                    |                              |                           |                         |                        |            |                                               |                              |                           |                         |                        |                        |           |                |   |                   |  |
| <b>MFLA2601</b> | 4.18 E-2                                                                                                                    | 4.621                        | 5.073                     | 5.865                   | 0.548                  | Y          | ●●                                            | Y                            | 1.73 E-1                  | 22.446                  | 24.179                 | 24.559                 | -0.457    | Y              | ● |                   |  |
|                 | PsiF [Methylobacillus flagellatus KT]637939527 YP_546707                                                                    |                              |                           |                         |                        |            |                                               |                              |                           |                         |                        |                        |           |                |   |                   |  |
| <b>MFLA2602</b> | 6.464                                                                                                                       | 6.816                        | 7.651                     | -0.525                  | Y                      | ●●         | Y                                             | 2.3 E-1                      | 25.641                    | 25.744                  | 26.694                 | -0.089                 | Y         | ●              |   |                   |  |
|                 | Carboxymethylenebutenolide [Methylobacillus flagellatus KT]637939528 YP_546708                                              |                              |                           |                         |                        |            |                                               |                              |                           |                         |                        |                        |           |                |   |                   |  |
| <b>MFLA2603</b> | 4.748                                                                                                                       | 4.064                        | 5.446                     | 0.701                   | Y                      | ●●         | Y                                             | 2.48 E-1                     | 22.695                    | 22.576                  | 23.637                 | 0.233                  | Y         | ●              |   |                   |  |
|                 | restriction endonuclease [Methylobacillus flagellatus KT]637939529 YP_546709                                                |                              |                           |                         |                        |            |                                               |                              |                           |                         |                        |                        |           |                |   |                   |  |
| <b>MFLA2604</b> | 1.16 E-1                                                                                                                    | 5.642                        | 5.643                     | 6.643                   | 0.007                  | Y          | ●●                                            | G                            | 9.49 E-3                  | 23.552                  | 24.824                 | 25.324                 | -1.277    | Y              | ● |                   |  |
|                 | N-6 DNA methylase [Methylobacillus flagellatus KT]637939530 YP_546710                                                       |                              |                           |                         |                        |            |                                               |                              |                           |                         |                        |                        |           |                |   |                   |  |
| <b>MFLA2605</b> | 3.173                                                                                                                       | 3.488                        | 4.339                     | -0.417                  | Y                      | ●●         | Y                                             | 2.07 E-2                     | 21.527                    | 22.423                  | 23.043                 | -0.905                 | Y         | ●              |   |                   |  |
|                 | virulence protein [Methylobacillus flagellatus KT]637939531 YP_546711                                                       |                              |                           |                         |                        |            |                                               |                              |                           |                         |                        |                        |           |                |   |                   |  |
| <b>MFLA2606</b> | 2.967                                                                                                                       | 3.764                        | 4.420                     | -0.757                  | Y                      | ●●         | Y                                             | 1.28 E-1                     | 21.522                    | 22.197                  | 22.899                 | -0.799                 | Y         | ●              |   |                   |  |
|                 | restriction modification system DNA specificity domain [Methylobacillus flagellatus KT]637939532 YP_546712                  |                              |                           |                         |                        |            |                                               |                              |                           |                         |                        |                        |           |                |   |                   |  |
| <b>MFLA2607</b> | 6.080                                                                                                                       | 6.515                        | 7.314                     | -0.395                  | Y                      | ●●         | Y                                             | 2.59 E-2                     | 24.417                    | 25.302                  | 25.926                 | -0.867                 | Y         | ●              |   |                   |  |
|                 | protein of unknown function DUF450 [Methylobacillus flagellatus KT]637939533 YP_546713                                      |                              |                           |                         |                        |            |                                               |                              |                           |                         |                        |                        |           |                |   |                   |  |
| <b>MFLA2608</b> |                                                                                                                             | 0.000                        | 0.000                     |                         |                        |            |                                               | 0.000                        | 0.000                     |                         |                        |                        |           |                |   |                   |  |
|                 | [Methylobacillus flagellatus KT]639329604                                                                                   |                              |                           |                         |                        |            |                                               |                              |                           |                         |                        |                        |           |                |   |                   |  |
| <b>MFLA2609</b> | 4.949                                                                                                                       | 4.098                        | 5.585                     | 0.858                   | Y                      | ●●         | Y                                             | 2.25 E-1                     | 23.671                    | 23.546                  | 24.610                 | 0.075                  | Y         | ●              |   |                   |  |
|                 | PfkB [Methylobacillus flagellatus KT]637939534 YP_546714                                                                    |                              |                           |                         |                        |            |                                               |                              |                           |                         |                        |                        |           |                |   |                   |  |

| ORF             | AM/OH <i>M. Flagellatus</i> Spectral Count                                                                                                     |                      |                   |                 |                |            | AM/OH <i>M. Flagellatus</i> Protein Intensity |                      |                   |                 |                |           | Spectral Count         |  | Protein Intensity |  |
|-----------------|------------------------------------------------------------------------------------------------------------------------------------------------|----------------------|-------------------|-----------------|----------------|------------|-----------------------------------------------|----------------------|-------------------|-----------------|----------------|-----------|------------------------|--|-------------------|--|
|                 | $q$ -value                                                                                                                                     | $\log_2$ Methylamine | $\log_2$ Methanol | $\log_2$ Sc Sum | $\log_2$ Ratio | Regulation | $q$ -value                                    | $\log_2$ Methylamine | $\log_2$ Methanol | $\log_2$ PI Sum | $\log_2$ Ratio | Consensus | Log <sub>2</sub> Ratio |  |                   |  |
| <b>MFLA2610</b> |                                                                                                                                                | 4.294                | 2.226             | 4.603           | 1.994          | Y ●● Y     | 9.64 E-2                                      | 21.637               | 20.262            | 22.108          | 1.000          | Y ●       |                        |  |                   |  |
|                 | " Sucrose-phosphate synthase, glycosyltransferase region [Methylobacillus flagellatus KT]637939535 YP_546715 ""                                |                      |                   |                 |                |            |                                               |                      |                   |                 |                |           |                        |  |                   |  |
| <b>MFLA2611</b> | 4.16 E-2                                                                                                                                       | 4.929                | 4.880             | 5.905           | -0.017         | Y ●● Y     | 1.95 E-1                                      | 23.556               | 23.874            | 24.724          | -0.309         | Y ●       |                        |  |                   |  |
|                 | " alpha amylase, catalytic region [Methylobacillus flagellatus KT]637939536 YP_546716 ""                                                       |                      |                   |                 |                |            |                                               |                      |                   |                 |                |           |                        |  |                   |  |
| <b>MFLA2612</b> |                                                                                                                                                | 2.923                | 2.540             | 3.744           | 0.105          | Y ●● Y     | 1.02 E-1                                      | 19.717               | 22.552            | 22.741          | -0.955         | Y ●       |                        |  |                   |  |
|                 | MscS Mechanosensitive ion channel [Methylobacillus flagellatus KT]637939537 YP_546717                                                          |                      |                   |                 |                |            |                                               |                      |                   |                 |                |           |                        |  |                   |  |
| <b>MFLA2613</b> |                                                                                                                                                | 0.000                | 0.000             |                 |                | ■ ■        |                                               | 0.000                | 0.000             |                 |                | ■         |                        |  |                   |  |
|                 | hypothetical protein [Methylobacillus flagellatus KT]637939538 YP_546718                                                                       |                      |                   |                 |                |            |                                               |                      |                   |                 |                |           |                        |  |                   |  |
| <b>MFLA2614</b> |                                                                                                                                                | 0.000                | 0.000             |                 |                | ■ ■        |                                               | 0.000                | 0.000             |                 |                | ■         |                        |  |                   |  |
|                 | " transcriptional regulator, ArsR family [Methylobacillus flagellatus KT]637939539 YP_546719 ""                                                |                      |                   |                 |                |            |                                               |                      |                   |                 |                |           |                        |  |                   |  |
| <b>MFLA2615</b> |                                                                                                                                                | 4.017                | 4.308             | 5.170           | -0.328         | Y ●● Y     | 3.03 E-2                                      | 23.468               | 24.662            | 25.185          | -1.268         | Y ●       |                        |  |                   |  |
|                 | ProQ activator of osmoprotectant transporter ProP [Methylobacillus flagellatus KT]637939540 YP_546720                                          |                      |                   |                 |                |            |                                               |                      |                   |                 |                |           |                        |  |                   |  |
| <b>MFLA2616</b> |                                                                                                                                                | 0.000                | 0.000             |                 |                | ■ ■        |                                               | 0.000                | 0.000             |                 |                | ■         |                        |  |                   |  |
|                 | NUDIX hydrolase [Methylobacillus flagellatus KT]637939541 YP_546721                                                                            |                      |                   |                 |                |            |                                               |                      |                   |                 |                |           |                        |  |                   |  |
| <b>MFLA2617</b> |                                                                                                                                                |                      | 1.825             | 1.825           |                | Y ●● Y     |                                               |                      | 21.436            | 21.436          |                | Y ●       |                        |  |                   |  |
|                 | hypothetical protein [Methylobacillus flagellatus KT]637939542 YP_546722                                                                       |                      |                   |                 |                |            |                                               |                      |                   |                 |                |           |                        |  |                   |  |
| <b>MFLA2618</b> |                                                                                                                                                | 0.000                | 0.000             |                 |                | ■ ■        |                                               | 0.000                | 0.000             |                 |                | ■         |                        |  |                   |  |
|                 | protein of unknown function DUF182 [Methylobacillus flagellatus KT]637939543 YP_546723                                                         |                      |                   |                 |                |            |                                               |                      |                   |                 |                |           |                        |  |                   |  |
| <b>MFLA2619</b> | 7.57 E-13                                                                                                                                      | 8.198                | 7.447             | 8.871           | 0.749          | R ●● Y     | 2.53 E-1                                      | 27.153               | 27.114            | 28.134          | 0.024          | Y ●       |                        |  |                   |  |
|                 | Twin-arginine translocation pathway signal [Methylobacillus flagellatus KT]637939544 YP_546724                                                 |                      |                   |                 |                |            |                                               |                      |                   |                 |                |           |                        |  |                   |  |
| <b>MFLA2620</b> | 1.81 E-2                                                                                                                                       | 5.777                | 5.721             | 6.749           | -0.018         | Y ●● Y     | 1.05 E-1                                      | 24.547               | 25.081            | 25.839          | -0.612         | Y ●       |                        |  |                   |  |
|                 | (2Fe-2S)-binding [Methylobacillus flagellatus KT]637939545 YP_546725                                                                           |                      |                   |                 |                |            |                                               |                      |                   |                 |                |           |                        |  |                   |  |
| <b>MFLA2621</b> |                                                                                                                                                | 3.294                | 2.410             | 3.919           | 0.862          | Y ●● Y     | 9.62 E-2                                      | 22.271               | 20.584            | 22.661          | 1.139          | Y ●       |                        |  |                   |  |
|                 | " transcriptional regulator, LysR family [Methylobacillus flagellatus KT]637939546 YP_546726 ""                                                |                      |                   |                 |                |            |                                               |                      |                   |                 |                |           |                        |  |                   |  |
| <b>MFLA2622</b> |                                                                                                                                                | 0.000                | 0.000             |                 |                | ■ ■        |                                               | 0.000                | 0.000             |                 |                | ■         |                        |  |                   |  |
|                 | major facilitator superfamily MFS_1 [Methylobacillus flagellatus KT]637939547 YP_546727                                                        |                      |                   |                 |                |            |                                               |                      |                   |                 |                |           |                        |  |                   |  |
| <b>MFLA2623</b> |                                                                                                                                                | 0.000                | 0.000             |                 |                | ■ ■        |                                               | 0.000                | 0.000             |                 |                | ■         |                        |  |                   |  |
|                 | VanZ like protein [Methylobacillus flagellatus KT]637939548 YP_546728                                                                          |                      |                   |                 |                |            |                                               |                      |                   |                 |                |           |                        |  |                   |  |
| <b>MFLA2624</b> |                                                                                                                                                |                      | 0.000             | 0.000           |                | Y ●● Y     |                                               |                      | 18.058            | 18.058          |                | Y ●       |                        |  |                   |  |
|                 | hypothetical protein [Methylobacillus flagellatus KT]637939549 YP_546729                                                                       |                      |                   |                 |                |            |                                               |                      |                   |                 |                |           |                        |  |                   |  |
| <b>MFLA2625</b> |                                                                                                                                                | 0.000                | 0.000             |                 |                | ■ ■        |                                               | 0.000                | 0.000             |                 |                | ■         |                        |  |                   |  |
|                 | [Methylobacillus flagellatus KT]639329605                                                                                                      |                      |                   |                 |                |            |                                               |                      |                   |                 |                |           |                        |  |                   |  |
| <b>MFLA2626</b> |                                                                                                                                                | 4.665                | 3.385             | 5.163           | 1.295          | Y ●● Y     | 1.46 E-1                                      | 22.089               | 22.811            | 23.495          | -0.265         | Y ●       |                        |  |                   |  |
|                 | diguanylate cyclase (GGDEF domain) [Methylobacillus flagellatus KT]637939550 YP_546730                                                         |                      |                   |                 |                |            |                                               |                      |                   |                 |                |           |                        |  |                   |  |
| <b>MFLA2627</b> |                                                                                                                                                | 0.000                | 0.000             |                 |                | ■ ■        |                                               | 0.000                | 0.000             |                 |                | ■         |                        |  |                   |  |
|                 | hypothetical protein [Methylobacillus flagellatus KT]637939551 YP_546731                                                                       |                      |                   |                 |                |            |                                               |                      |                   |                 |                |           |                        |  |                   |  |
| <b>MFLA2628</b> |                                                                                                                                                | 4.774                | 5.012             | 5.898           | -0.243         | Y ●● Y     | 1.13 E-1                                      | 22.659               | 23.122            | 23.909          | -0.610         | Y ●       |                        |  |                   |  |
|                 | diguanylate cyclase/phosphodiesterase (GGDEF & EAL domains) with PAS/PAC and GAF sensor(s) [Methylobacillus flagellatus KT]637939552 YP_546732 |                      |                   |                 |                |            |                                               |                      |                   |                 |                |           |                        |  |                   |  |
| <b>MFLA2629</b> | 1.98 E-2                                                                                                                                       | 5.167                | 4.891             | 6.035           | 0.216          | Y ●● Y     | 1.77 E-1                                      | 24.096               | 24.244            | 25.172          | -0.132         | Y ●       |                        |  |                   |  |
|                 | hypothetical protein [Methylobacillus flagellatus KT]637939553 YP_546733                                                                       |                      |                   |                 |                |            |                                               |                      |                   |                 |                |           |                        |  |                   |  |
| <b>MFLA2630</b> |                                                                                                                                                | 0.000                | 0.000             |                 |                | ■ ■        |                                               | 0.000                | 0.000             |                 |                | ■         |                        |  |                   |  |
|                 | major facilitator superfamily MFS_1 [Methylobacillus flagellatus KT]637939554 YP_546734                                                        |                      |                   |                 |                |            |                                               |                      |                   |                 |                |           |                        |  |                   |  |
| <b>MFLA2631</b> |                                                                                                                                                | 0.000                | 0.000             |                 |                | ■ ■        |                                               | 0.000                | 0.000             |                 |                | ■         |                        |  |                   |  |
|                 | Entericidin EcnAB [Methylobacillus flagellatus KT]637939555 YP_546735                                                                          |                      |                   |                 |                |            |                                               |                      |                   |                 |                |           |                        |  |                   |  |

| ORF             | AM/OH <i>M. Flagellatus</i> Spectral Count                                                                                |                              |                           |                         |                        |            | AM/OH <i>M. Flagellatus</i> Protein Intensity |                              |                           |                         |                        |                        | Consensus | Spectral Count |   | Protein Intensity |  |
|-----------------|---------------------------------------------------------------------------------------------------------------------------|------------------------------|---------------------------|-------------------------|------------------------|------------|-----------------------------------------------|------------------------------|---------------------------|-------------------------|------------------------|------------------------|-----------|----------------|---|-------------------|--|
|                 | q-value                                                                                                                   | log <sub>2</sub> Methylamine | log <sub>2</sub> Methanol | log <sub>2</sub> Sc Sum | log <sub>2</sub> Ratio | Regulation | q-value                                       | log <sub>2</sub> Methylamine | log <sub>2</sub> Methanol | log <sub>2</sub> PI Sum | log <sub>2</sub> Ratio | Log <sub>2</sub> Ratio |           | -7             | 0 | 7                 |  |
| <b>MFLA2632</b> |                                                                                                                           | 0.521                        |                           | 0.521                   |                        | Y ●● Y     |                                               | 18.491                       |                           | 18.491                  |                        | Y ●                    |           |                |   |                   |  |
|                 | " transcriptional regulator, LysR family [Methylobacillus flagellatus KT]637939556 YP_546736 ""                           |                              |                           |                         |                        |            |                                               |                              |                           |                         |                        |                        |           |                |   |                   |  |
| <b>MFLA2633</b> |                                                                                                                           | 0.000                        | 0.000                     |                         |                        | ■ ■        |                                               | 0.000                        |                           | 0.000                   |                        | ■                      |           |                |   |                   |  |
|                 | DoxX [Methylobacillus flagellatus KT]637939557 YP_546737                                                                  |                              |                           |                         |                        |            |                                               |                              |                           |                         |                        |                        |           |                |   |                   |  |
| <b>MFLA2634</b> |                                                                                                                           | 0.000                        | 0.000                     |                         |                        | ■ ■        |                                               | 0.000                        |                           | 0.000                   |                        | ■                      |           |                |   |                   |  |
|                 | " Extradial ring-cleavage dioxygenase, class III enzyme, subunit B [Methylobacillus flagellatus KT]637939558 YP_546738 "" |                              |                           |                         |                        |            |                                               |                              |                           |                         |                        |                        |           |                |   |                   |  |
| <b>MFLA2635</b> | 4.547                                                                                                                     | 4.462                        | 5.505                     | 0.069                   | Y ●● Y                 |            | 1.83 E-1                                      | 23.177                       | 23.302                    | 24.241                  | -0.095                 | Y ●                    |           |                |   |                   |  |
|                 | MltA [Methylobacillus flagellatus KT]637939559 YP_546739                                                                  |                              |                           |                         |                        |            |                                               |                              |                           |                         |                        |                        |           |                |   |                   |  |
| <b>MFLA2636</b> | 1.59 E-8                                                                                                                  | 5.282                        | 3.627                     | 5.680                   | 1.397                  | R ●● Y     |                                               | 2.43 E-1                     | 23.702                    | 23.623                  | 24.663                 | -0.031                 | Y ●       |                |   |                   |  |
|                 | ApaG [Methylobacillus flagellatus KT]637939560 YP_546740                                                                  |                              |                           |                         |                        |            |                                               |                              |                           |                         |                        |                        |           |                |   |                   |  |
| <b>MFLA2637</b> | 4.675                                                                                                                     | 5.509                        | 6.151                     | -1.303                  | Y ●● Y                 |            | 5.2 E-2                                       | 24.179                       | 25.520                    | 26.000                  | -1.237                 | Y ●                    |           |                |   |                   |  |
|                 | thiazole biosynthesis [Methylobacillus flagellatus KT]637939561 YP_546741                                                 |                              |                           |                         |                        |            |                                               |                              |                           |                         |                        |                        |           |                |   |                   |  |
| <b>MFLA2638</b> | 3.318                                                                                                                     | 2.585                        | 3.997                     | -0.333                  | Y ●● Y                 |            | 4.63 E-2                                      | 23.362                       | 23.017                    | 24.200                  | -0.660                 | Y ●                    |           |                |   |                   |  |
|                 | thiamine biosynthesis protein ThiS [Methylobacillus flagellatus KT]637939562 YP_546742                                    |                              |                           |                         |                        |            |                                               |                              |                           |                         |                        |                        |           |                |   |                   |  |
| <b>MFLA2639</b> | 3.952                                                                                                                     | 4.609                        | 5.317                     | -0.633                  | Y ●● Y                 |            | 2.29 E-1                                      | 23.056                       | 23.126                    | 24.092                  | -0.033                 | Y ●                    |           |                |   |                   |  |
|                 | Tetratricopeptide TPR_2 [Methylobacillus flagellatus KT]637939563 YP_546743                                               |                              |                           |                         |                        |            |                                               |                              |                           |                         |                        |                        |           |                |   |                   |  |
| <b>MFLA2640</b> | 3.159                                                                                                                     | 3.213                        | 4.186                     | 0.155                   | Y ●● Y                 |            | 2.31 E-1                                      | 20.985                       | 20.665                    | 21.834                  | 0.206                  | Y ●                    |           |                |   |                   |  |
|                 | DegT/Dnr/EryC1/StrS aminotransferase [Methylobacillus flagellatus KT]637939564 YP_546744                                  |                              |                           |                         |                        |            |                                               |                              |                           |                         |                        |                        |           |                |   |                   |  |
| <b>MFLA2641</b> | 0.000                                                                                                                     | 0.000                        |                           |                         |                        | ■ ■        |                                               | 0.000                        |                           | 0.000                   |                        | ■                      |           |                |   |                   |  |
|                 | acyl carrier protein [Methylobacillus flagellatus KT]637939565 YP_546745                                                  |                              |                           |                         |                        |            |                                               |                              |                           |                         |                        |                        |           |                |   |                   |  |
| <b>MFLA2642</b> | 1.09 E-1                                                                                                                  | 5.515                        | 5.733                     | 6.628                   | -0.235                 | Y ●● Y     |                                               | 1.39 E-2                     | 24.830                    | 25.677                  | 26.315                 | -0.863                 | Y ●       |                |   |                   |  |
|                 | 3-oxoacyl-(acyl-carrier protein) synthase [Methylobacillus flagellatus KT]637939566 YP_546746                             |                              |                           |                         |                        |            |                                               |                              |                           |                         |                        |                        |           |                |   |                   |  |
| <b>MFLA2643</b> | 3.996                                                                                                                     | 4.162                        | 5.081                     | -0.173                  | Y ●● Y                 |            | 1.23 E-1                                      | 21.615                       | 22.201                    | 22.938                  | -0.900                 | Y ●                    |           |                |   |                   |  |
|                 | short-chain dehydrogenase/reductase SDR [Methylobacillus flagellatus KT]637939567 YP_546747                               |                              |                           |                         |                        |            |                                               |                              |                           |                         |                        |                        |           |                |   |                   |  |
| <b>MFLA2644</b> | 1.22 E-4                                                                                                                  | 5.327                        | 4.398                     | 5.936                   | 0.847                  | R ●● Y     |                                               | 2.72 E-1                     | 22.687                    | 22.702                  | 23.695                 | -0.105                 | Y ●       |                |   |                   |  |
|                 | short-chain dehydrogenase/reductase SDR [Methylobacillus flagellatus KT]637939568 YP_546748                               |                              |                           |                         |                        |            |                                               |                              |                           |                         |                        |                        |           |                |   |                   |  |
| <b>MFLA2645</b> | 2.746                                                                                                                     | 3.008                        | 3.883                     | -0.443                  | Y ●● Y                 |            | 1.11 E-1                                      | 20.548                       | 21.866                    | 22.352                  | -0.962                 | Y ●                    |           |                |   |                   |  |
|                 | acetyltransferase [Methylobacillus flagellatus KT]637939569 YP_546749                                                     |                              |                           |                         |                        |            |                                               |                              |                           |                         |                        |                        |           |                |   |                   |  |
| <b>MFLA2646</b> | 2.521                                                                                                                     | 2.226                        | 3.381                     | 1.394                   | Y ●● Y                 |            | 1.52 E-1                                      | 21.393                       | 22.179                    | 22.839                  | 0.236                  | Y ●                    |           |                |   |                   |  |
|                 | Rieske (2Fe-2S) region [Methylobacillus flagellatus KT]637939570 YP_546750                                                |                              |                           |                         |                        |            |                                               |                              |                           |                         |                        |                        |           |                |   |                   |  |
| <b>MFLA2647</b> | 0.813                                                                                                                     |                              | 0.813                     |                         | Y ●● Y                 |            |                                               | 18.842                       |                           | 18.842                  |                        | Y ●                    |           |                |   |                   |  |
|                 | hypothetical protein [Methylobacillus flagellatus KT]637939571 YP_546751                                                  |                              |                           |                         |                        |            |                                               |                              |                           |                         |                        |                        |           |                |   |                   |  |
| <b>MFLA2648</b> | 1.84 E-2                                                                                                                  | 5.838                        | 6.319                     | 7.098                   | -0.484                 | Y ●● Y     |                                               | 2.22 E-1                     | 24.858                    | 24.797                  | 25.828                 | 0.076                  | Y ●       |                |   |                   |  |
|                 | Methyltransferase FkbM [Methylobacillus flagellatus KT]637939572 YP_546752                                                |                              |                           |                         |                        |            |                                               |                              |                           |                         |                        |                        |           |                |   |                   |  |
| <b>MFLA2649</b> | 0.000                                                                                                                     | 0.000                        |                           |                         |                        | ■ ■        |                                               | 0.000                        |                           | 0.000                   |                        | ■                      |           |                |   |                   |  |
|                 | hypothetical protein [Methylobacillus flagellatus KT]637939573 YP_546753                                                  |                              |                           |                         |                        |            |                                               |                              |                           |                         |                        |                        |           |                |   |                   |  |
| <b>MFLA2650</b> | 3.270                                                                                                                     | 4.669                        | 5.133                     | -1.765                  | Y ●● Y                 |            | 2.39 E-2                                      | 21.868                       | 23.262                    | 23.727                  | -1.706                 | Y ●                    |           |                |   |                   |  |
|                 | " glycosyl transferase, family 2 [Methylobacillus flagellatus KT]637939574 YP_546754 ""                                   |                              |                           |                         |                        |            |                                               |                              |                           |                         |                        |                        |           |                |   |                   |  |
| <b>MFLA2651</b> | 0.000                                                                                                                     | 0.000                        |                           |                         |                        | ■ ■        |                                               | 0.000                        |                           | 0.000                   |                        | ■                      |           |                |   |                   |  |
|                 | CsbD-like protein [Methylobacillus flagellatus KT]637939575 YP_546755                                                     |                              |                           |                         |                        |            |                                               |                              |                           |                         |                        |                        |           |                |   |                   |  |
| <b>MFLA2652</b> | 0.000                                                                                                                     | 0.000                        |                           |                         |                        | ■ ■        |                                               | 0.000                        |                           | 0.000                   |                        | ■                      |           |                |   |                   |  |
|                 | 1-aminocyclopropane-1-carboxylate deaminase-like protein [Methylobacillus flagellatus KT]637939576 YP_546756              |                              |                           |                         |                        |            |                                               |                              |                           |                         |                        |                        |           |                |   |                   |  |
| <b>MFLA2653</b> | 0                                                                                                                         | 6.773                        | 0.000                     | 6.786                   | 5.692                  | R ●● Y     |                                               | 1.16 E-1                     | 25.075                    | 18.267                  | 25.088                 | 5.419                  | R ●       |                |   |                   |  |
|                 | TonB-dependent receptor [Methylobacillus flagellatus KT]637939577 YP_546757                                               |                              |                           |                         |                        |            |                                               |                              |                           |                         |                        |                        |           |                |   |                   |  |

| ORF             | AM/OH <i>M. Flagellatus</i> Spectral Count                                                                                                    |                              |                           |                         |                        | AM/OH <i>M. Flagellatus</i> Protein Intensity |         |                              |                           |                         | Spectral Count         |           | Protein Intensity      |   |   |
|-----------------|-----------------------------------------------------------------------------------------------------------------------------------------------|------------------------------|---------------------------|-------------------------|------------------------|-----------------------------------------------|---------|------------------------------|---------------------------|-------------------------|------------------------|-----------|------------------------|---|---|
|                 | q-value                                                                                                                                       | log <sub>2</sub> Methylamine | log <sub>2</sub> Methanol | log <sub>2</sub> Sc Sum | log <sub>2</sub> Ratio | Regulation                                    | q-value | log <sub>2</sub> Methylamine | log <sub>2</sub> Methanol | log <sub>2</sub> PI Sum | log <sub>2</sub> Ratio | Consensus | Log <sub>2</sub> Ratio |   |   |
| <b>MFLA2654</b> |                                                                                                                                               | 0.000                        | 0.000                     |                         |                        |                                               | 0.000   | 0.000                        |                           |                         |                        |           |                        |   |   |
|                 | <i>major facilitator superfamily MFS_1 [Methylobacillus flagellatus KT]637939579 YP_546758</i>                                                |                              |                           |                         |                        |                                               |         |                              |                           |                         |                        |           |                        |   |   |
| <b>MFLA2655</b> | 5.719                                                                                                                                         | 5.098                        | 6.442                     | 0.503                   | Y                      | ●●                                            | Y       | 2.02 E-1                     | 24.656                    | 24.518                  | 25.589                 | 0.093     | Y                      | ● |   |
|                 | <i>response regulator receiver (CheY-like) modulated metal dependent phosphohydrolase [Methylobacillus flagellatus KT]637939580 YP_546759</i> |                              |                           |                         |                        |                                               |         |                              |                           |                         |                        |           |                        |   |   |
| <b>MFLA2656</b> | 4.481                                                                                                                                         | 3.924                        | 5.229                     | 0.523                   | Y                      | ●●                                            | Y       | 2.18 E-1                     | 23.088                    | 22.820                  | 23.960                 | 0.158     | Y                      | ● |   |
|                 | <i>multi-sensor hybrid histidine kinase [Methylobacillus flagellatus KT]637939581 YP_546760</i>                                               |                              |                           |                         |                        |                                               |         |                              |                           |                         |                        |           |                        |   |   |
| <b>MFLA2657</b> | 0.000                                                                                                                                         | 0.000                        |                           |                         |                        |                                               | 0.000   | 0.000                        |                           |                         |                        |           |                        |   |   |
|                 | <i>Enoyl-CoA hydratase/isomerase [Methylobacillus flagellatus KT]637939582 YP_546761</i>                                                      |                              |                           |                         |                        |                                               |         |                              |                           |                         |                        |           |                        |   |   |
| <b>MFLA2658</b> | 4.080                                                                                                                                         |                              | 4.080                     |                         | Y                      | ●●                                            | Y       |                              | 23.375                    |                         | 23.375                 |           | Y                      | ● |   |
|                 | <i>membrane protein involved in aromatic hydrocarbon degradation [Methylobacillus flagellatus KT]637939583 YP_546762</i>                      |                              |                           |                         |                        |                                               |         |                              |                           |                         |                        |           |                        |   |   |
| <b>MFLA2659</b> | 0.000                                                                                                                                         | 0.000                        |                           |                         |                        |                                               | 0.000   | 0.000                        |                           |                         |                        |           |                        |   |   |
|                 | <i>hypothetical protein [Methylobacillus flagellatus KT]637939584 YP_546763</i>                                                               |                              |                           |                         |                        |                                               |         |                              |                           |                         |                        |           |                        |   |   |
| <b>MFLA2660</b> | 4.435                                                                                                                                         | 5.093                        | 5.801                     | -0.657                  | Y                      | ●●                                            | Y       | 2.7 E-2                      | 24.365                    | 25.223                  | 25.857                 | -0.841    | Y                      | ● |   |
|                 | <i>UspA [Methylobacillus flagellatus KT]637939585 YP_546764</i>                                                                               |                              |                           |                         |                        |                                               |         |                              |                           |                         |                        |           |                        |   |   |
| <b>MFLA2661</b> | 5.74 E-2                                                                                                                                      | 5.631                        | 5.541                     | 6.587                   | 0.043                  | Y                                             | ●●      | Y                            | 2.23 E-1                  | 23.979                  | 23.906                 | 24.943    | 0.070                  | Y | ● |
|                 | <i>" ATPase, E1-E2 type [Methylobacillus flagellatus KT]637939586 YP_546765 ""</i>                                                            |                              |                           |                         |                        |                                               |         |                              |                           |                         |                        |           |                        |   |   |
| <b>MFLA2662</b> | 4.696                                                                                                                                         | 4.281                        | 5.504                     | 0.436                   | Y                      | ●●                                            | Y       | 2.66 E-1                     | 24.496                    | 24.548                  | 25.522                 | -0.362    | Y                      | ● |   |
|                 | <i>Phosphomethylpyrimidine kinase [Methylobacillus flagellatus KT]637939587 YP_546766</i>                                                     |                              |                           |                         |                        |                                               |         |                              |                           |                         |                        |           |                        |   |   |
| <b>MFLA2663</b> |                                                                                                                                               | 1.184                        | 1.184                     |                         |                        | Y                                             | ●●      | Y                            |                           | 20.634                  | 20.634                 |           | Y                      | ● |   |
|                 | <i>thiamine-phosphate pyrophosphorylase [Methylobacillus flagellatus KT]637939588 YP_546767</i>                                               |                              |                           |                         |                        |                                               |         |                              |                           |                         |                        |           |                        |   |   |
| <b>MFLA2664</b> | 3.6 E-4                                                                                                                                       | 4.787                        | 5.689                     | 6.308                   | -0.949                 | G                                             | ●●      | Y                            | 1.17 E-2                  | 24.467                  | 25.622                 | 26.157    | -1.149                 | G | ● |
|                 | <i>" glutamate-1-semialdehyde-2,1-aminomutase [Methylobacillus flagellatus KT]637939589 YP_546768 ""</i>                                      |                              |                           |                         |                        |                                               |         |                              |                           |                         |                        |           |                        |   |   |
| <b>MFLA2665</b> | 1.843                                                                                                                                         | 2.739                        | 3.360                     | 0.105                   | Y                      | ●●                                            | Y       | 2.71 E-1                     | 18.846                    | 19.883                  | 20.456                 | 0.184     | Y                      | ● |   |
|                 | <i>hypothetical protein [Methylobacillus flagellatus KT]637939590 YP_546769</i>                                                               |                              |                           |                         |                        |                                               |         |                              |                           |                         |                        |           |                        |   |   |
| <b>MFLA2666</b> | 4.875                                                                                                                                         | 4.654                        | 5.769                     | 0.212                   | Y                      | ●●                                            | Y       | 2.08 E-1                     | 24.028                    | 23.811                  | 24.923                 | 0.232     | Y                      | ● |   |
|                 | <i>uroporphyrinogen decarboxylase [Methylobacillus flagellatus KT]637939591 YP_546770</i>                                                     |                              |                           |                         |                        |                                               |         |                              |                           |                         |                        |           |                        |   |   |
| <b>MFLA2667</b> | 7.967                                                                                                                                         | 8.439                        | 9.222                     | -0.427                  | Y                      | ●●                                            | Y       | 8.94 E-3                     | 27.545                    | 28.017                  | 28.800                 | -0.475    | Y                      | ● |   |
|                 | <i>Peptidoglycan-binding LysM [Methylobacillus flagellatus KT]637939592 YP_546771</i>                                                         |                              |                           |                         |                        |                                               |         |                              |                           |                         |                        |           |                        |   |   |
| <b>MFLA2668</b> | 0.000                                                                                                                                         | 0.000                        |                           |                         |                        |                                               | 0.000   | 0.000                        |                           |                         |                        |           |                        |   |   |
|                 | <i>hypothetical protein [Methylobacillus flagellatus KT]637939593 YP_546772</i>                                                               |                              |                           |                         |                        |                                               |         |                              |                           |                         |                        |           |                        |   |   |
| <b>MFLA2669</b> | 5.638                                                                                                                                         | 6.115                        | 6.896                     | -0.640                  | Y                      | ●●                                            | Y       | 1.15 E-1                     | 25.272                    | 25.631                  | 26.463                 | -0.355    | Y                      | ● |   |
|                 | <i>short-chain dehydrogenase/reductase SDR [Methylobacillus flagellatus KT]637939594 YP_546773</i>                                            |                              |                           |                         |                        |                                               |         |                              |                           |                         |                        |           |                        |   |   |
| <b>MFLA2670</b> | 0.000                                                                                                                                         | 0.000                        |                           |                         |                        |                                               | 0.000   | 0.000                        |                           |                         |                        |           |                        |   |   |
|                 | <i>hypothetical protein [Methylobacillus flagellatus KT]637939595 YP_546774</i>                                                               |                              |                           |                         |                        |                                               |         |                              |                           |                         |                        |           |                        |   |   |
| <b>MFLA2671</b> | 0.000                                                                                                                                         | 0.000                        |                           |                         |                        |                                               | 0.000   | 0.000                        |                           |                         |                        |           |                        |   |   |
|                 | <i>hypothetical protein [Methylobacillus flagellatus KT]637939596 YP_546775</i>                                                               |                              |                           |                         |                        |                                               |         |                              |                           |                         |                        |           |                        |   |   |
| <b>MFLA2672</b> | 0.521                                                                                                                                         | 2.000                        | 2.442                     | -1.479                  | Y                      | ●●                                            | Y       |                              | 19.312                    | 20.316                  | 20.899                 | -1.004    | Y                      | ● |   |
|                 | <i>primosomal protein N' [Methylobacillus flagellatus KT]637939597 YP_546776</i>                                                              |                              |                           |                         |                        |                                               |         |                              |                           |                         |                        |           |                        |   |   |
| <b>MFLA2673</b> | 1.74 E-4                                                                                                                                      | 7.864                        | 8.224                     | 9.055                   | -0.351                 | Y                                             | ●●      | Y                            | 2.72 E-1                  | 26.581                  | 26.560                 | 27.571    | -0.148                 | Y | ● |
|                 | <i>arginyl-tRNA synthetase [Methylobacillus flagellatus KT]637939598 YP_546777</i>                                                            |                              |                           |                         |                        |                                               |         |                              |                           |                         |                        |           |                        |   |   |
| <b>MFLA2674</b> | 2.78 E-3                                                                                                                                      | 4.701                        | 5.450                     | 6.123                   | -0.772                 | G                                             | ●●      | Y                            | 3.86 E-2                  | 24.827                  | 25.622                 | 26.279    | -0.824                 | G | ● |
|                 | <i>Sporulation related [Methylobacillus flagellatus KT]637939599 YP_546778</i>                                                                |                              |                           |                         |                        |                                               |         |                              |                           |                         |                        |           |                        |   |   |
| <b>MFLA2675</b> | 7.347                                                                                                                                         | 7.664                        | 8.514                     | -0.275                  | Y                      | ●●                                            | Y       | 1.13 E-1                     | 27.977                    | 28.388                  | 29.197                 | -0.387    | Y                      | ● |   |
|                 | <i>DSBA oxidoreductase [Methylobacillus flagellatus KT]637939600 YP_546779</i>                                                                |                              |                           |                         |                        |                                               |         |                              |                           |                         |                        |           |                        |   |   |



AM/OH *M. Flagellatus* Spectral Count

AM/OH *M. Flagellatus* Protein Intensity

| ORF             | AM/OH <i>M. Flagellatus</i> Spectral Count                                                                   |                              |                           |                         |                        | AM/OH <i>M. Flagellatus</i> Protein Intensity |         |                              |                           |                         | Consensus | Log <sub>2</sub> Ratio |                        |
|-----------------|--------------------------------------------------------------------------------------------------------------|------------------------------|---------------------------|-------------------------|------------------------|-----------------------------------------------|---------|------------------------------|---------------------------|-------------------------|-----------|------------------------|------------------------|
|                 | q-value                                                                                                      | log <sub>2</sub> Methylamine | log <sub>2</sub> Methanol | log <sub>2</sub> Sc Sum | log <sub>2</sub> Ratio | Regulation                                    | q-value | log <sub>2</sub> Methylamine | log <sub>2</sub> Methanol | log <sub>2</sub> PI Sum |           |                        | log <sub>2</sub> Ratio |
| <b>MFLA2676</b> |                                                                                                              | 0.000                        | 0.000                     |                         |                        | ■ ■                                           |         | 0.000                        | 0.000                     |                         |           | ■                      |                        |
|                 | <i>short-chain dehydrogenase/reductase SDR [Methylobacillus flagellatus KT]637939601 YP_546780</i>           |                              |                           |                         |                        |                                               |         |                              |                           |                         |           |                        |                        |
| <b>MFLA2677</b> |                                                                                                              | 0.000                        | 0.000                     |                         |                        | ■ ■                                           |         | 0.000                        | 0.000                     |                         |           | ■                      |                        |
|                 | <i>hypothetical protein [Methylobacillus flagellatus KT]637939602 YP_546781</i>                              |                              |                           |                         |                        |                                               |         |                              |                           |                         |           |                        |                        |
| <b>MFLA2678</b> |                                                                                                              | 0.000                        | 0.000                     |                         |                        | ■ ■                                           |         | 0.000                        | 0.000                     |                         |           | ■                      |                        |
|                 | <i>hypothetical protein [Methylobacillus flagellatus KT]637939603 YP_546782</i>                              |                              |                           |                         |                        |                                               |         |                              |                           |                         |           |                        |                        |
| <b>MFLA2679</b> |                                                                                                              | 0.000                        | 0.000                     |                         |                        | ■ ■                                           |         | 0.000                        | 0.000                     |                         |           | ■                      |                        |
|                 | <i>TonB-dependent receptor [Methylobacillus flagellatus KT]637939604 YP_546783</i>                           |                              |                           |                         |                        |                                               |         |                              |                           |                         |           |                        |                        |
| <b>MFLA2680</b> |                                                                                                              | 0.000                        | 0.000                     |                         |                        | ■ ■                                           |         | 0.000                        | 0.000                     |                         |           | ■                      |                        |
|                 | <i>putative FecR [Methylobacillus flagellatus KT]637939605 YP_546784</i>                                     |                              |                           |                         |                        |                                               |         |                              |                           |                         |           |                        |                        |
| <b>MFLA2681</b> |                                                                                                              | 0.000                        | 0.000                     |                         |                        | ■ ■                                           |         | 0.000                        | 0.000                     |                         |           | ■                      |                        |
|                 | <i>sigma-24 (FecI-like) [Methylobacillus flagellatus KT]637939606 YP_546785</i>                              |                              |                           |                         |                        |                                               |         |                              |                           |                         |           |                        |                        |
| <b>MFLA2682</b> |                                                                                                              | 1.521                        |                           | 1.521                   |                        | Y ● ● Y                                       |         | 18.823                       |                           | 18.823                  |           | Y ●                    |                        |
|                 | <i>DNA adenine methylase [Methylobacillus flagellatus KT]637939607 YP_546786</i>                             |                              |                           |                         |                        |                                               |         |                              |                           |                         |           |                        |                        |
| <b>MFLA2683</b> |                                                                                                              | 0.000                        | 0.000                     |                         |                        | ■ ■                                           |         | 0.000                        | 0.000                     |                         |           | ■                      |                        |
|                 | <i>hypothetical protein [Methylobacillus flagellatus KT]637939608 YP_546787</i>                              |                              |                           |                         |                        |                                               |         |                              |                           |                         |           |                        |                        |
| <b>MFLA2684</b> |                                                                                                              | 0.000                        | 0.000                     |                         |                        | ■ ■                                           |         | 0.000                        | 0.000                     |                         |           | ■                      |                        |
|                 | <i>hypothetical protein [Methylobacillus flagellatus KT]637939609 YP_546788</i>                              |                              |                           |                         |                        |                                               |         |                              |                           |                         |           |                        |                        |
| <b>MFLA2685</b> |                                                                                                              | 0.000                        | 0.000                     |                         |                        | ■ ■                                           |         | 0.000                        | 0.000                     |                         |           | ■                      |                        |
|                 | <i>Phage-related protein tail component-like protein [Methylobacillus flagellatus KT]637939610 YP_546789</i> |                              |                           |                         |                        |                                               |         |                              |                           |                         |           |                        |                        |
| <b>MFLA2686</b> |                                                                                                              | 0.000                        | 0.000                     |                         |                        | ■ ■                                           |         | 0.000                        | 0.000                     |                         |           | ■                      |                        |
|                 | <i>hypothetical protein [Methylobacillus flagellatus KT]637939611 YP_546790</i>                              |                              |                           |                         |                        |                                               |         |                              |                           |                         |           |                        |                        |
| <b>MFLA2687</b> |                                                                                                              | 0.000                        | 0.000                     |                         |                        | ■ ■                                           |         | 0.000                        | 0.000                     |                         |           | ■                      |                        |
|                 | <i>hypothetical protein [Methylobacillus flagellatus KT]637939612 YP_546791</i>                              |                              |                           |                         |                        |                                               |         |                              |                           |                         |           |                        |                        |
| <b>MFLA2688</b> |                                                                                                              | 0.000                        | 0.000                     |                         |                        | ■ ■                                           |         | 0.000                        | 0.000                     |                         |           | ■                      |                        |
|                 | <i>hypothetical protein [Methylobacillus flagellatus KT]637939613 YP_546792</i>                              |                              |                           |                         |                        |                                               |         |                              |                           |                         |           |                        |                        |
| <b>MFLA2689</b> |                                                                                                              | 0.000                        | 0.000                     |                         |                        | ■ ■                                           |         | 0.000                        | 0.000                     |                         |           | ■                      |                        |
|                 | <i>hypothetical protein [Methylobacillus flagellatus KT]637939614 YP_546793</i>                              |                              |                           |                         |                        |                                               |         |                              |                           |                         |           |                        |                        |
| <b>MFLA2690</b> |                                                                                                              | 0.000                        | 0.000                     |                         |                        | ■ ■                                           |         | 0.000                        | 0.000                     |                         |           | ■                      |                        |
|                 | <i>hypothetical protein [Methylobacillus flagellatus KT]637939615 YP_546794</i>                              |                              |                           |                         |                        |                                               |         |                              |                           |                         |           |                        |                        |
| <b>MFLA2691</b> |                                                                                                              | 0.000                        | 0.000                     |                         |                        | ■ ■                                           |         | 0.000                        | 0.000                     |                         |           | ■                      |                        |
|                 | <i>hypothetical protein [Methylobacillus flagellatus KT]637939616 YP_546795</i>                              |                              |                           |                         |                        |                                               |         |                              |                           |                         |           |                        |                        |
| <b>MFLA2692</b> |                                                                                                              | 0.000                        | 0.000                     |                         |                        | ■ ■                                           |         | 0.000                        | 0.000                     |                         |           | ■                      |                        |
|                 | <i>hypothetical protein [Methylobacillus flagellatus KT]637939617 YP_546796</i>                              |                              |                           |                         |                        |                                               |         |                              |                           |                         |           |                        |                        |
| <b>MFLA2693</b> |                                                                                                              | 0.000                        | 0.000                     |                         |                        | ■ ■                                           |         | 0.000                        | 0.000                     |                         |           | ■                      |                        |
|                 | <i>hypothetical protein [Methylobacillus flagellatus KT]637939618 YP_546797</i>                              |                              |                           |                         |                        |                                               |         |                              |                           |                         |           |                        |                        |
| <b>MFLA2694</b> |                                                                                                              | 0.000                        | 0.000                     |                         |                        | ■ ■                                           |         | 0.000                        | 0.000                     |                         |           | ■                      |                        |
|                 | <i>hypothetical protein [Methylobacillus flagellatus KT]637939619 YP_546798</i>                              |                              |                           |                         |                        |                                               |         |                              |                           |                         |           |                        |                        |
| <b>MFLA2695</b> |                                                                                                              | 0.000                        | 0.000                     |                         |                        | ■ ■                                           |         | 0.000                        | 0.000                     |                         |           | ■                      |                        |
|                 | <i>hypothetical protein [Methylobacillus flagellatus KT]637939620 YP_546799</i>                              |                              |                           |                         |                        |                                               |         |                              |                           |                         |           |                        |                        |
| <b>MFLA2696</b> |                                                                                                              |                              | 2.562                     | 2.562                   |                        | Y ● ● Y                                       |         |                              | 21.401                    | 21.401                  |           | Y ●                    |                        |
|                 | <i>hypothetical protein [Methylobacillus flagellatus KT]637939621 YP_546800</i>                              |                              |                           |                         |                        |                                               |         |                              |                           |                         |           |                        |                        |
| <b>MFLA2697</b> |                                                                                                              | 0.000                        | 0.000                     |                         |                        | ■ ■                                           |         | 0.000                        | 0.000                     |                         |           | ■                      |                        |
|                 | <i>hypothetical protein [Methylobacillus flagellatus KT]637939622 YP_546801</i>                              |                              |                           |                         |                        |                                               |         |                              |                           |                         |           |                        |                        |



AM/OH *M. Flagellatus* Spectral Count

AM/OH *M. Flagellatus* Protein Intensity

| ORF             | AM/OH <i>M. Flagellatus</i> Spectral Count                                                                   |                              |                           |                         |                        |            | AM/OH <i>M. Flagellatus</i> Protein Intensity |                              |                           |                         |                        |        | Consensus | Log <sub>2</sub> Ratio |   |
|-----------------|--------------------------------------------------------------------------------------------------------------|------------------------------|---------------------------|-------------------------|------------------------|------------|-----------------------------------------------|------------------------------|---------------------------|-------------------------|------------------------|--------|-----------|------------------------|---|
|                 | <i>q</i> -value                                                                                              | log <sub>2</sub> Methylamine | log <sub>2</sub> Methanol | log <sub>2</sub> Sc Sum | log <sub>2</sub> Ratio | Regulation | <i>q</i> -value                               | log <sub>2</sub> Methylamine | log <sub>2</sub> Methanol | log <sub>2</sub> PI Sum | log <sub>2</sub> Ratio |        |           |                        |   |
| <b>MFLA2698</b> |                                                                                                              | 0.000                        | 0.000                     |                         |                        |            |                                               | 0.000                        | 0.000                     |                         |                        |        |           |                        |   |
|                 | <i>hypothetical protein [Methylobacillus flagellatus KT]637939623 YP_546802</i>                              |                              |                           |                         |                        |            |                                               |                              |                           |                         |                        |        |           |                        |   |
| <b>MFLA2699</b> |                                                                                                              | 0.000                        | 0.000                     |                         |                        |            |                                               | 0.000                        | 0.000                     |                         |                        |        |           |                        |   |
|                 | <i>hypothetical protein [Methylobacillus flagellatus KT]637939624 YP_546803</i>                              |                              |                           |                         |                        |            |                                               |                              |                           |                         |                        |        |           |                        |   |
| <b>MFLA2700</b> |                                                                                                              | 0.000                        | 0.000                     |                         |                        |            |                                               | 0.000                        | 0.000                     |                         |                        |        |           |                        |   |
|                 | <i>hypothetical protein [Methylobacillus flagellatus KT]637939625 YP_546804</i>                              |                              |                           |                         |                        |            |                                               |                              |                           |                         |                        |        |           |                        |   |
| <b>MFLA2701</b> |                                                                                                              | 0.000                        | 0.000                     |                         |                        |            |                                               | 0.000                        | 0.000                     |                         |                        |        |           |                        |   |
|                 | <i>Mu-like prophage FluMu protein gp28-like [Methylobacillus flagellatus KT]637939626 YP_546805</i>          |                              |                           |                         |                        |            |                                               |                              |                           |                         |                        |        |           |                        |   |
| <b>MFLA2702</b> |                                                                                                              | 0.000                        | 0.000                     |                         |                        |            |                                               | 0.000                        | 0.000                     |                         |                        |        |           |                        |   |
|                 | <i>hypothetical protein [Methylobacillus flagellatus KT]637939627 YP_546806</i>                              |                              |                           |                         |                        |            |                                               |                              |                           |                         |                        |        |           |                        |   |
| <b>MFLA2703</b> |                                                                                                              | 0.000                        | 0.000                     |                         |                        |            |                                               | 0.000                        | 0.000                     |                         |                        |        |           |                        |   |
|                 | <i>hypothetical protein [Methylobacillus flagellatus KT]637939628 YP_546807</i>                              |                              |                           |                         |                        |            |                                               |                              |                           |                         |                        |        |           |                        |   |
| <b>MFLA2704</b> |                                                                                                              | 0.000                        | 0.000                     |                         |                        |            |                                               | 0.000                        | 0.000                     |                         |                        |        |           |                        |   |
|                 | <i>hypothetical protein [Methylobacillus flagellatus KT]637939629 YP_546808</i>                              |                              |                           |                         |                        |            |                                               |                              |                           |                         |                        |        |           |                        |   |
| <b>MFLA2705</b> |                                                                                                              | 0.000                        | 0.000                     |                         |                        |            |                                               | 0.000                        | 0.000                     |                         |                        |        |           |                        |   |
|                 | <i>" transcriptional regulators, TraR/DksA family [Methylobacillus flagellatus KT]637939630 YP_546809 ""</i> |                              |                           |                         |                        |            |                                               |                              |                           |                         |                        |        |           |                        |   |
| <b>MFLA2706</b> |                                                                                                              | 0.000                        | 0.000                     |                         |                        |            |                                               | 0.000                        | 0.000                     |                         |                        |        |           |                        |   |
|                 | <i>bacteriophage lysis protein [Methylobacillus flagellatus KT]637939631 YP_546810</i>                       |                              |                           |                         |                        |            |                                               |                              |                           |                         |                        |        |           |                        |   |
| <b>MFLA2707</b> |                                                                                                              | 0.000                        | 0.000                     |                         |                        |            |                                               | 0.000                        | 0.000                     |                         |                        |        |           |                        |   |
|                 | <i>" N-acetylmuramoyl-L-alanine amidase, family 2 [Methylobacillus flagellatus KT]637939632 YP_546811 ""</i> |                              |                           |                         |                        |            |                                               |                              |                           |                         |                        |        |           |                        |   |
| <b>MFLA2708</b> | 1.813                                                                                                        | 2.871                        | 3.437                     | -0.056                  | Y                      | ●          | ●                                             | Y                            | 1.01 E-1                  | 18.745                  | 20.596                 | 20.949 | -0.814    | Y                      | ● |
|                 | <i>hypothetical protein [Methylobacillus flagellatus KT]637939633 YP_546812</i>                              |                              |                           |                         |                        |            |                                               |                              |                           |                         |                        |        |           |                        |   |
| <b>MFLA2709</b> | 4.687                                                                                                        | 2.907                        | 5.056                     | 0.771                   | Y                      | ●          | ●                                             | Y                            | 1.4 E-1                   | 25.025                  | 21.689                 | 25.161 | 1.765     | Y                      | ● |
|                 | <i>hypothetical protein [Methylobacillus flagellatus KT]637939634 YP_546813</i>                              |                              |                           |                         |                        |            |                                               |                              |                           |                         |                        |        |           |                        |   |
| <b>MFLA2710</b> |                                                                                                              | 2.000                        | 2.000                     |                         | Y                      | ●          | ●                                             | Y                            |                           |                         | 21.637                 | 21.637 |           | Y                      | ● |
|                 | <i>" transcriptional regulator, XRE family [Methylobacillus flagellatus KT]637939635 YP_546814 ""</i>        |                              |                           |                         |                        |            |                                               |                              |                           |                         |                        |        |           |                        |   |
| <b>MFLA2711</b> |                                                                                                              | 0.000                        | 0.000                     |                         |                        |            |                                               | 0.000                        | 0.000                     |                         |                        |        |           |                        |   |
|                 | <i>hypothetical protein [Methylobacillus flagellatus KT]637939636 YP_546815</i>                              |                              |                           |                         |                        |            |                                               |                              |                           |                         |                        |        |           |                        |   |
| <b>MFLA2712</b> |                                                                                                              | 0.000                        | 0.000                     |                         |                        |            |                                               | 0.000                        | 0.000                     |                         |                        |        |           |                        |   |
|                 | <i>hypothetical protein [Methylobacillus flagellatus KT]637939637 YP_546816</i>                              |                              |                           |                         |                        |            |                                               |                              |                           |                         |                        |        |           |                        |   |
| <b>MFLA2713</b> |                                                                                                              | 0.000                        | 0.000                     |                         |                        |            |                                               | 0.000                        | 0.000                     |                         |                        |        |           |                        |   |
|                 | <i>hypothetical protein [Methylobacillus flagellatus KT]637939638 YP_546817</i>                              |                              |                           |                         |                        |            |                                               |                              |                           |                         |                        |        |           |                        |   |
| <b>MFLA2714</b> |                                                                                                              | 0.000                        | 0.000                     |                         |                        |            |                                               | 0.000                        | 0.000                     |                         |                        |        |           |                        |   |
|                 | <i>hypothetical protein [Methylobacillus flagellatus KT]637939639 YP_546818</i>                              |                              |                           |                         |                        |            |                                               |                              |                           |                         |                        |        |           |                        |   |
| <b>MFLA2715</b> |                                                                                                              | 0.000                        | 0.000                     |                         |                        |            |                                               | 0.000                        | 0.000                     |                         |                        |        |           |                        |   |
|                 | <i>hypothetical protein [Methylobacillus flagellatus KT]637939640 YP_546819</i>                              |                              |                           |                         |                        |            |                                               |                              |                           |                         |                        |        |           |                        |   |
| <b>MFLA2716</b> |                                                                                                              | 0.000                        | 0.000                     |                         | Y                      | ●          | ●                                             | Y                            |                           | 18.280                  | 18.280                 |        |           | Y                      | ● |
|                 | <i>hypothetical protein [Methylobacillus flagellatus KT]637939641 YP_546820</i>                              |                              |                           |                         |                        |            |                                               |                              |                           |                         |                        |        |           |                        |   |
| <b>MFLA2717</b> |                                                                                                              | 0.000                        | 0.000                     |                         |                        |            |                                               | 0.000                        | 0.000                     |                         |                        |        |           |                        |   |
|                 | <i>conserved hypothetical phage-related protein [Methylobacillus flagellatus KT]637939642 YP_546821</i>      |                              |                           |                         |                        |            |                                               |                              |                           |                         |                        |        |           |                        |   |
| <b>MFLA2718</b> |                                                                                                              | 0.000                        | 0.000                     |                         |                        |            |                                               | 0.000                        | 0.000                     |                         |                        |        |           |                        |   |
|                 | <i>hypothetical protein [Methylobacillus flagellatus KT]637939643 YP_546822</i>                              |                              |                           |                         |                        |            |                                               |                              |                           |                         |                        |        |           |                        |   |
| <b>MFLA2719</b> |                                                                                                              | 0.000                        | 0.000                     |                         |                        |            |                                               | 0.000                        | 0.000                     |                         |                        |        |           |                        |   |
|                 | <i>hypothetical protein [Methylobacillus flagellatus KT]637939644 YP_546823</i>                              |                              |                           |                         |                        |            |                                               |                              |                           |                         |                        |        |           |                        |   |

| ORF             | AM/OH <i>M. Flagellatus</i> Spectral Count                                                                                                        |                              |                           |                         |                        |            | AM/OH <i>M. Flagellatus</i> Protein Intensity |                              |                           |                         |                        |                        | Consensus | Spectral Count |   | Protein Intensity |  |
|-----------------|---------------------------------------------------------------------------------------------------------------------------------------------------|------------------------------|---------------------------|-------------------------|------------------------|------------|-----------------------------------------------|------------------------------|---------------------------|-------------------------|------------------------|------------------------|-----------|----------------|---|-------------------|--|
|                 | q-value                                                                                                                                           | log <sub>2</sub> Methylamine | log <sub>2</sub> Methanol | log <sub>2</sub> Sc Sum | log <sub>2</sub> Ratio | Regulation | q-value                                       | log <sub>2</sub> Methylamine | log <sub>2</sub> Methanol | log <sub>2</sub> PI Sum | log <sub>2</sub> Ratio | Log <sub>2</sub> Ratio |           | -7             | 0 | 7                 |  |
| <b>MFLA2720</b> |                                                                                                                                                   | 0.000                        | 0.000                     |                         |                        |            |                                               | 0.000                        | 0.000                     |                         |                        |                        |           |                |   |                   |  |
|                 | <i>hypothetical protein [Methylobacillus flagellatus KT]637939645 YP_546824</i>                                                                   |                              |                           |                         |                        |            |                                               |                              |                           |                         |                        |                        |           |                |   |                   |  |
| <b>MFLA2721</b> |                                                                                                                                                   | 0.813                        | 0.000                     | 1.463                   | 0.813                  | Y ●● Y     |                                               | 20.506                       | 18.754                    | 20.881                  | 1.752                  | Y ●                    |           |                |   |                   |  |
|                 | <i>hypothetical protein [Methylobacillus flagellatus KT]637939646 YP_546825</i>                                                                   |                              |                           |                         |                        |            |                                               |                              |                           |                         |                        |                        |           |                |   |                   |  |
| <b>MFLA2722</b> |                                                                                                                                                   | 0.000                        | 0.000                     |                         |                        |            |                                               | 0.000                        | 0.000                     |                         |                        |                        |           |                |   |                   |  |
|                 | <i>hypothetical protein [Methylobacillus flagellatus KT]637939647 YP_546826</i>                                                                   |                              |                           |                         |                        |            |                                               |                              |                           |                         |                        |                        |           |                |   |                   |  |
| <b>MFLA2723</b> |                                                                                                                                                   | 0.000                        | 0.000                     |                         |                        |            |                                               | 0.000                        | 0.000                     |                         |                        |                        |           |                |   |                   |  |
|                 | <i>hypothetical protein [Methylobacillus flagellatus KT]637939648 YP_546827</i>                                                                   |                              |                           |                         |                        |            |                                               |                              |                           |                         |                        |                        |           |                |   |                   |  |
| <b>MFLA2724</b> |                                                                                                                                                   | 1.49 E-2                     | 5.064                     | 5.014                   | 6.039                  | 0.059      | Y ●● Y                                        | 3.96 E-2                     | 21.691                    | 22.969                  | 23.467                 | -1.712                 | Y ●       |                |   |                   |  |
|                 | <i>histone-like DNA-binding protein [Methylobacillus flagellatus KT]637939649 YP_546828</i>                                                       |                              |                           |                         |                        |            |                                               |                              |                           |                         |                        |                        |           |                |   |                   |  |
| <b>MFLA2725</b> |                                                                                                                                                   | 0.000                        | 0.000                     |                         |                        |            |                                               | 0.000                        | 0.000                     |                         |                        |                        |           |                |   |                   |  |
|                 | <i>hypothetical protein [Methylobacillus flagellatus KT]637939650 YP_546829</i>                                                                   |                              |                           |                         |                        |            |                                               |                              |                           |                         |                        |                        |           |                |   |                   |  |
| <b>MFLA2726</b> |                                                                                                                                                   | 0.000                        | 0.000                     |                         |                        |            |                                               | 0.000                        | 0.000                     |                         |                        |                        |           |                |   |                   |  |
|                 | <i>hypothetical protein [Methylobacillus flagellatus KT]637939651 YP_546830</i>                                                                   |                              |                           |                         |                        |            |                                               |                              |                           |                         |                        |                        |           |                |   |                   |  |
| <b>MFLA2727</b> |                                                                                                                                                   | 0.000                        | 0.000                     |                         |                        |            |                                               | 0.000                        | 0.000                     |                         |                        |                        |           |                |   |                   |  |
|                 | <i>hypothetical protein [Methylobacillus flagellatus KT]637939652 YP_546831</i>                                                                   |                              |                           |                         |                        |            |                                               |                              |                           |                         |                        |                        |           |                |   |                   |  |
| <b>MFLA2728</b> |                                                                                                                                                   | 0.000                        | 0.000                     |                         |                        |            |                                               | 0.000                        | 0.000                     |                         |                        |                        |           |                |   |                   |  |
|                 | <i>protein of unknown function DUF1018 [Methylobacillus flagellatus KT]637939653 YP_546832</i>                                                    |                              |                           |                         |                        |            |                                               |                              |                           |                         |                        |                        |           |                |   |                   |  |
| <b>MFLA2729</b> |                                                                                                                                                   | 0.000                        | 0.000                     |                         |                        |            |                                               | 0.000                        | 0.000                     |                         |                        |                        |           |                |   |                   |  |
|                 | <i>hypothetical protein [Methylobacillus flagellatus KT]637939654 YP_546833</i>                                                                   |                              |                           |                         |                        |            |                                               |                              |                           |                         |                        |                        |           |                |   |                   |  |
| <b>MFLA2730</b> |                                                                                                                                                   | 0.000                        | 0.000                     |                         |                        |            |                                               | 0.000                        | 0.000                     |                         |                        |                        |           |                |   |                   |  |
|                 | <i>hypothetical protein [Methylobacillus flagellatus KT]637939655 YP_546834</i>                                                                   |                              |                           |                         |                        |            |                                               |                              |                           |                         |                        |                        |           |                |   |                   |  |
| <b>MFLA2731</b> |                                                                                                                                                   | 0.000                        | 0.000                     |                         |                        |            |                                               | 0.000                        | 0.000                     |                         |                        |                        |           |                |   |                   |  |
|                 | <i>hypothetical protein [Methylobacillus flagellatus KT]637939656 YP_546835</i>                                                                   |                              |                           |                         |                        |            |                                               |                              |                           |                         |                        |                        |           |                |   |                   |  |
| <b>MFLA2732</b> |                                                                                                                                                   | 2.761                        | 2.627                     | 3.696                   | -0.056                 | Y ●● Y     |                                               | 1.59 E-1                     | 21.986                    | 21.423                  | 22.732                 | 0.257                  | Y ●       |                |   |                   |  |
|                 | <i>Sel1 [Methylobacillus flagellatus KT]637939657 YP_546836</i>                                                                                   |                              |                           |                         |                        |            |                                               |                              |                           |                         |                        |                        |           |                |   |                   |  |
| <b>MFLA2733</b> |                                                                                                                                                   | 1.48 E-1                     | 5.985                     | 5.864                   | 6.926                  | 0.121      | Y ●● Y                                        | 4.07 E-2                     | 24.616                    | 24.993                  | 25.817                 | -0.391                 | Y ●       |                |   |                   |  |
|                 | <i>flavodoxin/nitric oxide synthase [Methylobacillus flagellatus KT]637939658 YP_546837</i>                                                       |                              |                           |                         |                        |            |                                               |                              |                           |                         |                        |                        |           |                |   |                   |  |
| <b>MFLA2734</b> |                                                                                                                                                   | 7.200                        | 6.892                     | 8.055                   | 0.288                  | Y ●● Y     |                                               | 1.66 E-2                     | 25.104                    | 25.650                  | 26.402                 | -0.556                 | Y ●       |                |   |                   |  |
|                 | <i>Glutamate synthase (NADPH) [Methylobacillus flagellatus KT]637939659 YP_546838</i>                                                             |                              |                           |                         |                        |            |                                               |                              |                           |                         |                        |                        |           |                |   |                   |  |
| <b>MFLA2735</b> |                                                                                                                                                   | 0.000                        | 0.000                     |                         |                        |            |                                               | 0.000                        | 0.000                     |                         |                        |                        |           |                |   |                   |  |
|                 | <i>hypothetical protein [Methylobacillus flagellatus KT]637939660 YP_546839</i>                                                                   |                              |                           |                         |                        |            |                                               |                              |                           |                         |                        |                        |           |                |   |                   |  |
| <b>MFLA2736</b> |                                                                                                                                                   | 3.844                        | 2.788                     | 4.411                   | 1.210                  | Y ●● Y     |                                               | 4.29 E-2                     | 21.440                    | 19.994                  | 21.891                 | 1.572                  | Y ●       |                |   |                   |  |
|                 | <i>putative FecR [Methylobacillus flagellatus KT]637939661 YP_546840</i>                                                                          |                              |                           |                         |                        |            |                                               |                              |                           |                         |                        |                        |           |                |   |                   |  |
| <b>MFLA2737</b> |                                                                                                                                                   | 5.020                        | 5.689                     | 6.393                   | -0.831                 | Y ●● Y     |                                               | 1.06 E-1                     | 24.025                    | 24.641                  | 25.366                 | -0.942                 | Y ●       |                |   |                   |  |
|                 | <i>diguanylate cyclase/phosphodiesterase (GGDEF &amp; EAL domains) with PAS/PAC sensor(s) [Methylobacillus flagellatus KT]637939662 YP_546841</i> |                              |                           |                         |                        |            |                                               |                              |                           |                         |                        |                        |           |                |   |                   |  |
| <b>MFLA2738</b> |                                                                                                                                                   | 0.000                        | 0.000                     |                         |                        |            |                                               | 0.000                        | 0.000                     |                         |                        |                        |           |                |   |                   |  |
|                 | <i>periplasmic sensor signal transduction histidine kinase [Methylobacillus flagellatus KT]637939663 YP_546842</i>                                |                              |                           |                         |                        |            |                                               |                              |                           |                         |                        |                        |           |                |   |                   |  |
| <b>MFLA2739</b> |                                                                                                                                                   | 4.16 E-2                     | 5.341                     | 4.839                   | 6.112                  | 0.489      | Y ●● Y                                        | 4.25 E-2                     | 22.865                    | 24.151                  | 24.647                 | -1.565                 | Y ●       |                |   |                   |  |
|                 | <i>" two component transcriptional regulator, winged helix family [Methylobacillus flagellatus KT]637939664 YP_546843 ""</i>                      |                              |                           |                         |                        |            |                                               |                              |                           |                         |                        |                        |           |                |   |                   |  |
| <b>MFLA2740</b> |                                                                                                                                                   | 0.000                        | 0.000                     |                         |                        |            |                                               | 0.000                        | 0.000                     |                         |                        |                        |           |                |   |                   |  |
|                 | <i>hypothetical protein [Methylobacillus flagellatus KT]637939665 YP_546844</i>                                                                   |                              |                           |                         |                        |            |                                               |                              |                           |                         |                        |                        |           |                |   |                   |  |
| <b>MFLA2741</b> |                                                                                                                                                   | 8.68 E-2                     | 6.511                     | 6.506                   | 7.509                  | 0.004      | Y ●● Y                                        | 1.89 E-2                     | 25.287                    | 26.171                  | 26.795                 | -0.905                 | Y ●       |                |   |                   |  |
|                 | <i>" glucosamine--fructose-6-phosphate aminotransferase, isomerizing [Methylobacillus flagellatus KT]637939666 YP_546845 ""</i>                   |                              |                           |                         |                        |            |                                               |                              |                           |                         |                        |                        |           |                |   |                   |  |

| ORF             | AM/OH <i>M. Flagellatus</i> Spectral Count                                                    |                     |                   |                 |                |            | AM/OH <i>M. Flagellatus</i> Protein Intensity |                     |                   |                 |                |           | Spectral Count         |  | Protein Intensity |  |
|-----------------|-----------------------------------------------------------------------------------------------|---------------------|-------------------|-----------------|----------------|------------|-----------------------------------------------|---------------------|-------------------|-----------------|----------------|-----------|------------------------|--|-------------------|--|
|                 | $q$ -value                                                                                    | $\log_2$ Methyamine | $\log_2$ Methanol | $\log_2$ Sc Sum | $\log_2$ Ratio | Regulation | $q$ -value                                    | $\log_2$ Methyamine | $\log_2$ Methanol | $\log_2$ PI Sum | $\log_2$ Ratio | Consensus | Log <sub>2</sub> Ratio |  |                   |  |
| <b>MFLA2742</b> | 2.56 E-2                                                                                      | 5.969               | 5.734             | 6.857           | 0.178          | Y ●● Y     | 4.38 E-2                                      | 23.481              | 24.459            | 25.051          | -1.214         | Y ●       |                        |  |                   |  |
|                 | UDP-N-acetylglucosamine pyrophosphorylase [Methylobacillus flagellatus KT]637939667 YP_546846 |                     |                   |                 |                |            |                                               |                     |                   |                 |                |           |                        |  |                   |  |
| <b>MFLA2743</b> | 3.42 E-5                                                                                      | 6.349               | 6.993             | 7.707           | -0.629         | G ●● Y     | 2.27 E-1                                      | 26.754              | 26.562            | 27.661          | -0.018         | Y ●       |                        |  |                   |  |
|                 | " ATP synthase F1, epsilon subunit [Methylobacillus flagellatus KT]637939668 YP_546847 ""     |                     |                   |                 |                |            |                                               |                     |                   |                 |                |           |                        |  |                   |  |
| <b>MFLA2744</b> | 0                                                                                             | 11.115              | 11.685            | 12.428          | -0.567         | G ●● Y     | 3.85 E-2                                      | 31.688              | 31.928            | 32.813          | -0.235         | G ●       |                        |  |                   |  |
|                 | " ATP synthase F1, beta subunit [Methylobacillus flagellatus KT]637939669 YP_546848 ""        |                     |                   |                 |                |            |                                               |                     |                   |                 |                |           |                        |  |                   |  |
| <b>MFLA2745</b> | 1.09 E-13                                                                                     | 8.496               | 7.809             | 9.193           | 0.684          | R ●● Y     | 2.07 E-1                                      | 27.846              | 27.951            | 28.900          | -0.153         | Y ●       |                        |  |                   |  |
|                 | " ATP synthase F1, gamma subunit [Methylobacillus flagellatus KT]637939670 YP_546849 ""       |                     |                   |                 |                |            |                                               |                     |                   |                 |                |           |                        |  |                   |  |
| <b>MFLA2746</b> | 0                                                                                             | 10.562              | 10.895            | 11.738          | -0.346         | Y ●● Y     | 1.66 E-2                                      | 31.242              | 31.464            | 32.357          | -0.222         | Y ●       |                        |  |                   |  |
|                 | " ATP synthase F1, alpha subunit [Methylobacillus flagellatus KT]637939671 YP_546850 ""       |                     |                   |                 |                |            |                                               |                     |                   |                 |                |           |                        |  |                   |  |
| <b>MFLA2747</b> | 0                                                                                             | 8.919               | 9.755             | 10.397          | -0.859         | G ●● Y     | 7.03 E-2                                      | 27.577              | 28.078            | 28.849          | -0.575         | G ●       |                        |  |                   |  |
|                 | " ATP synthase F1, delta subunit [Methylobacillus flagellatus KT]637939672 YP_546851 ""       |                     |                   |                 |                |            |                                               |                     |                   |                 |                |           |                        |  |                   |  |
| <b>MFLA2748</b> | 0                                                                                             | 6.468               | 7.612             | 8.151           | -1.132         | G ●● Y     | 1.32 E-2                                      | 26.542              | 28.077            | 28.505          | -1.693         | G ●       |                        |  |                   |  |
|                 | " ATP synthase F0, B subunit [Methylobacillus flagellatus KT]637939673 YP_546852 ""           |                     |                   |                 |                |            |                                               |                     |                   |                 |                |           |                        |  |                   |  |
| <b>MFLA2749</b> |                                                                                               | 0.000               | 0.000             |                 |                | ●●         |                                               | 0.000               | 0.000             |                 |                | ●         |                        |  |                   |  |
|                 | " ATP synthase F0, C subunit [Methylobacillus flagellatus KT]637939674 YP_546853 ""           |                     |                   |                 |                |            |                                               |                     |                   |                 |                |           |                        |  |                   |  |
| <b>MFLA2750</b> |                                                                                               | 0.000               | 0.000             |                 |                | ●●         |                                               | 0.000               | 0.000             |                 |                | ●         |                        |  |                   |  |
|                 | " ATP synthase F0, A subunit [Methylobacillus flagellatus KT]637939675 YP_546854 ""           |                     |                   |                 |                |            |                                               |                     |                   |                 |                |           |                        |  |                   |  |
| <b>MFLA2751</b> |                                                                                               | 0.000               | 0.000             |                 |                | ●●         |                                               | 0.000               | 0.000             |                 |                | ●         |                        |  |                   |  |
|                 | ATP synthase protein I [Methylobacillus flagellatus KT]637939676 YP_546855                    |                     |                   |                 |                |            |                                               |                     |                   |                 |                |           |                        |  |                   |  |
| <b>MFLA2752</b> |                                                                                               | 6.485               | 6.913             | 7.714           | -0.488         | Y ●● Y     | 1.59 E-1                                      | 26.132              | 26.242            | 27.188          | -0.128         | Y ●       |                        |  |                   |  |
|                 | parB-like partition proteins [Methylobacillus flagellatus KT]637939677 YP_546856              |                     |                   |                 |                |            |                                               |                     |                   |                 |                |           |                        |  |                   |  |
| <b>MFLA2753</b> | 4.48 E-11                                                                                     | 6.054               | 4.341             | 6.438           | 1.731          | R ●● Y     | 5.93 E-2                                      | 24.120              | 22.585            | 24.548          | 1.481          | R ●       |                        |  |                   |  |
|                 | " Cobyrinic acid a,c-diamide synthase [Methylobacillus flagellatus KT]637939678 YP_546857 ""  |                     |                   |                 |                |            |                                               |                     |                   |                 |                |           |                        |  |                   |  |
| <b>MFLA2754</b> |                                                                                               | 1.843               | 3.334             | 3.773           | -0.492         | Y ●● Y     | 2.04 E-1                                      | 21.892              | 22.999            | 23.549          | -0.090         | Y ●       |                        |  |                   |  |
|                 | methyltransferase GidB [Methylobacillus flagellatus KT]637939679 YP_546858                    |                     |                   |                 |                |            |                                               |                     |                   |                 |                |           |                        |  |                   |  |
| <b>MFLA2755</b> | 1.38 E-1                                                                                      | 5.723               | 5.646             | 6.685           | 0.066          | Y ●● Y     | 9.14 E-2                                      | 23.929              | 24.329            | 25.143          | -0.356         | Y ●       |                        |  |                   |  |
|                 | glucose inhibited division protein A [Methylobacillus flagellatus KT]637939680 YP_546859      |                     |                   |                 |                |            |                                               |                     |                   |                 |                |           |                        |  |                   |  |
| <b>MFLA2756</b> |                                                                                               | 0.000               | 0.000             |                 |                | ●●         |                                               | 0.000               | 0.000             |                 |                | ●         |                        |  |                   |  |
|                 | protein of unknown function DUF1555 [Methylobacillus flagellatus KT]637939681 YP_546860       |                     |                   |                 |                |            |                                               |                     |                   |                 |                |           |                        |  |                   |  |
| <b>MFLA2757</b> |                                                                                               | 4.700               | 5.218             | 5.982           | -0.521         | Y ●● Y     | 1.49 E-1                                      | 22.658              | 22.998            | 23.838          | -0.516         | Y ●       |                        |  |                   |  |
|                 | tRNA modification GTPase TrmE [Methylobacillus flagellatus KT]637939682 YP_546861             |                     |                   |                 |                |            |                                               |                     |                   |                 |                |           |                        |  |                   |  |
| <b>MFLA2758</b> | 4.46 E-2                                                                                      | 6.542               | 6.430             | 7.487           | 0.110          | Y ●● Y     | 5.07 E-2                                      | 26.121              | 26.757            | 27.474          | -0.692         | Y ●       |                        |  |                   |  |
|                 | 60 kDa inner membrane insertion protein [Methylobacillus flagellatus KT]637939683 YP_546862   |                     |                   |                 |                |            |                                               |                     |                   |                 |                |           |                        |  |                   |  |
| <b>MFLA2759</b> |                                                                                               | 0.000               | 0.000             |                 |                | ●●         |                                               | 0.000               | 0.000             |                 |                | ●         |                        |  |                   |  |
|                 | protein of unknown function DUF37 [Methylobacillus flagellatus KT]637939684 YP_546863         |                     |                   |                 |                |            |                                               |                     |                   |                 |                |           |                        |  |                   |  |
| <b>MFLA2760</b> |                                                                                               | 1.106               |                   | 1.106           |                | Y ●● Y     |                                               | 20.977              |                   | 20.977          |                | Y ●       |                        |  |                   |  |
|                 | ribonuclease P protein component [Methylobacillus flagellatus KT]637939685 YP_546864          |                     |                   |                 |                |            |                                               |                     |                   |                 |                |           |                        |  |                   |  |
| <b>MFLA2761</b> |                                                                                               | 0.000               | 0.000             |                 |                | ●●         |                                               | 0.000               | 0.000             |                 |                | ●         |                        |  |                   |  |
|                 | ribosomal protein L34 [Methylobacillus flagellatus KT]637939686 YP_546865                     |                     |                   |                 |                |            |                                               |                     |                   |                 |                |           |                        |  |                   |  |
