# Supplementary material
Source: PubMed Central journal article supplement (PMC2944507)
Supplement: supp_192_19_4859__3.pdf [file supp_192_19_4859__3.pdf]

# Supplementary File 3. Detected proteins mapped to genome.

ORF encoding strand:

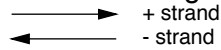

Fraction of neighboring ORFs detected within 2.5 kb before and after ORF:

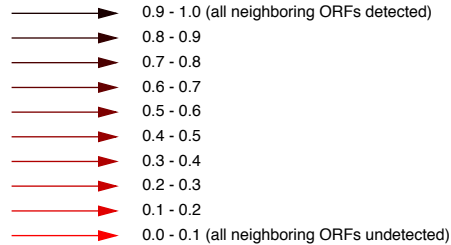

Locus tag  
Product annotation

E.g. + strand encoded ORF:

MFLA\_0118  
CobN/magnesium chelatase

Color codes for COG function:

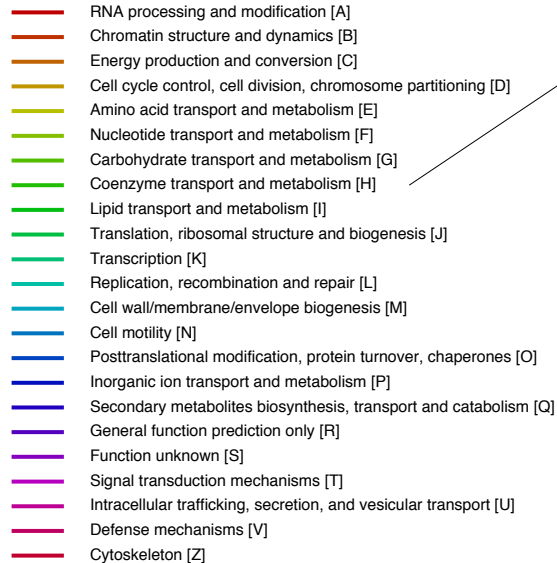

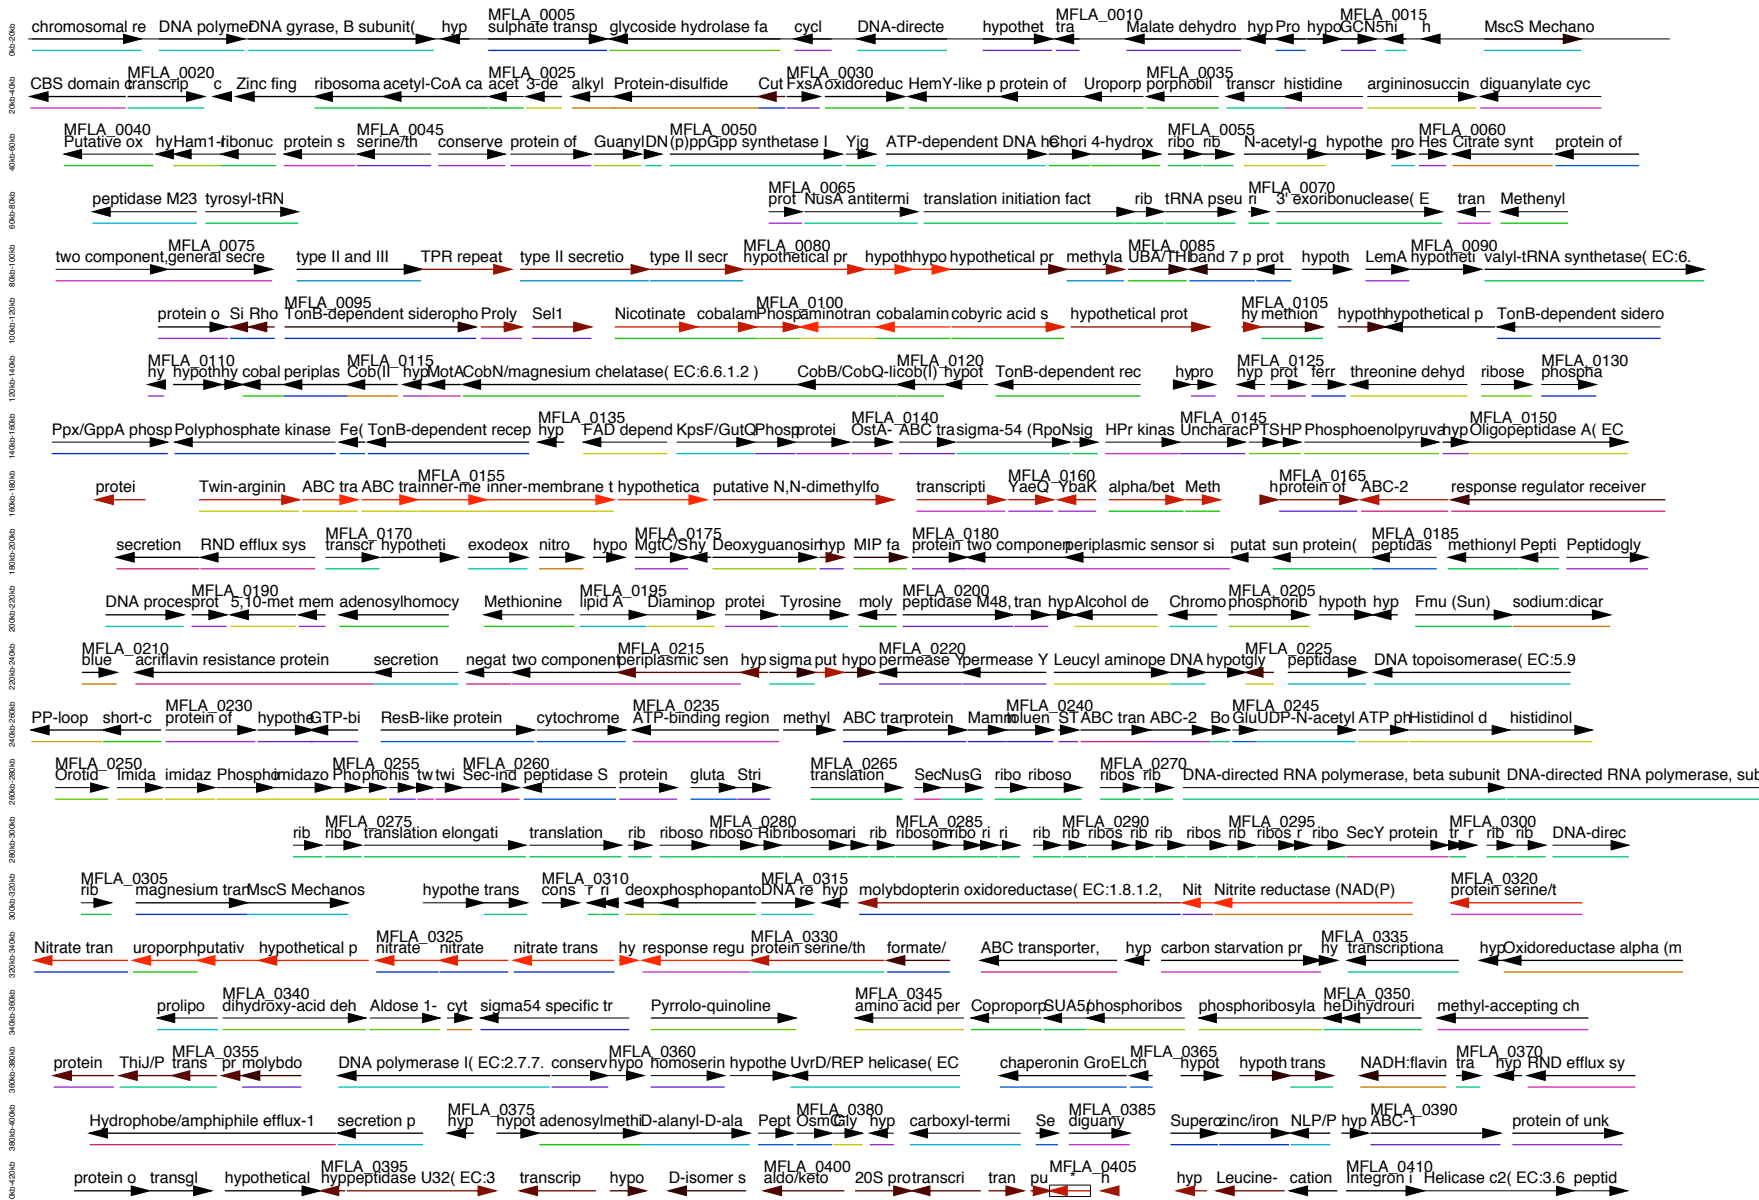

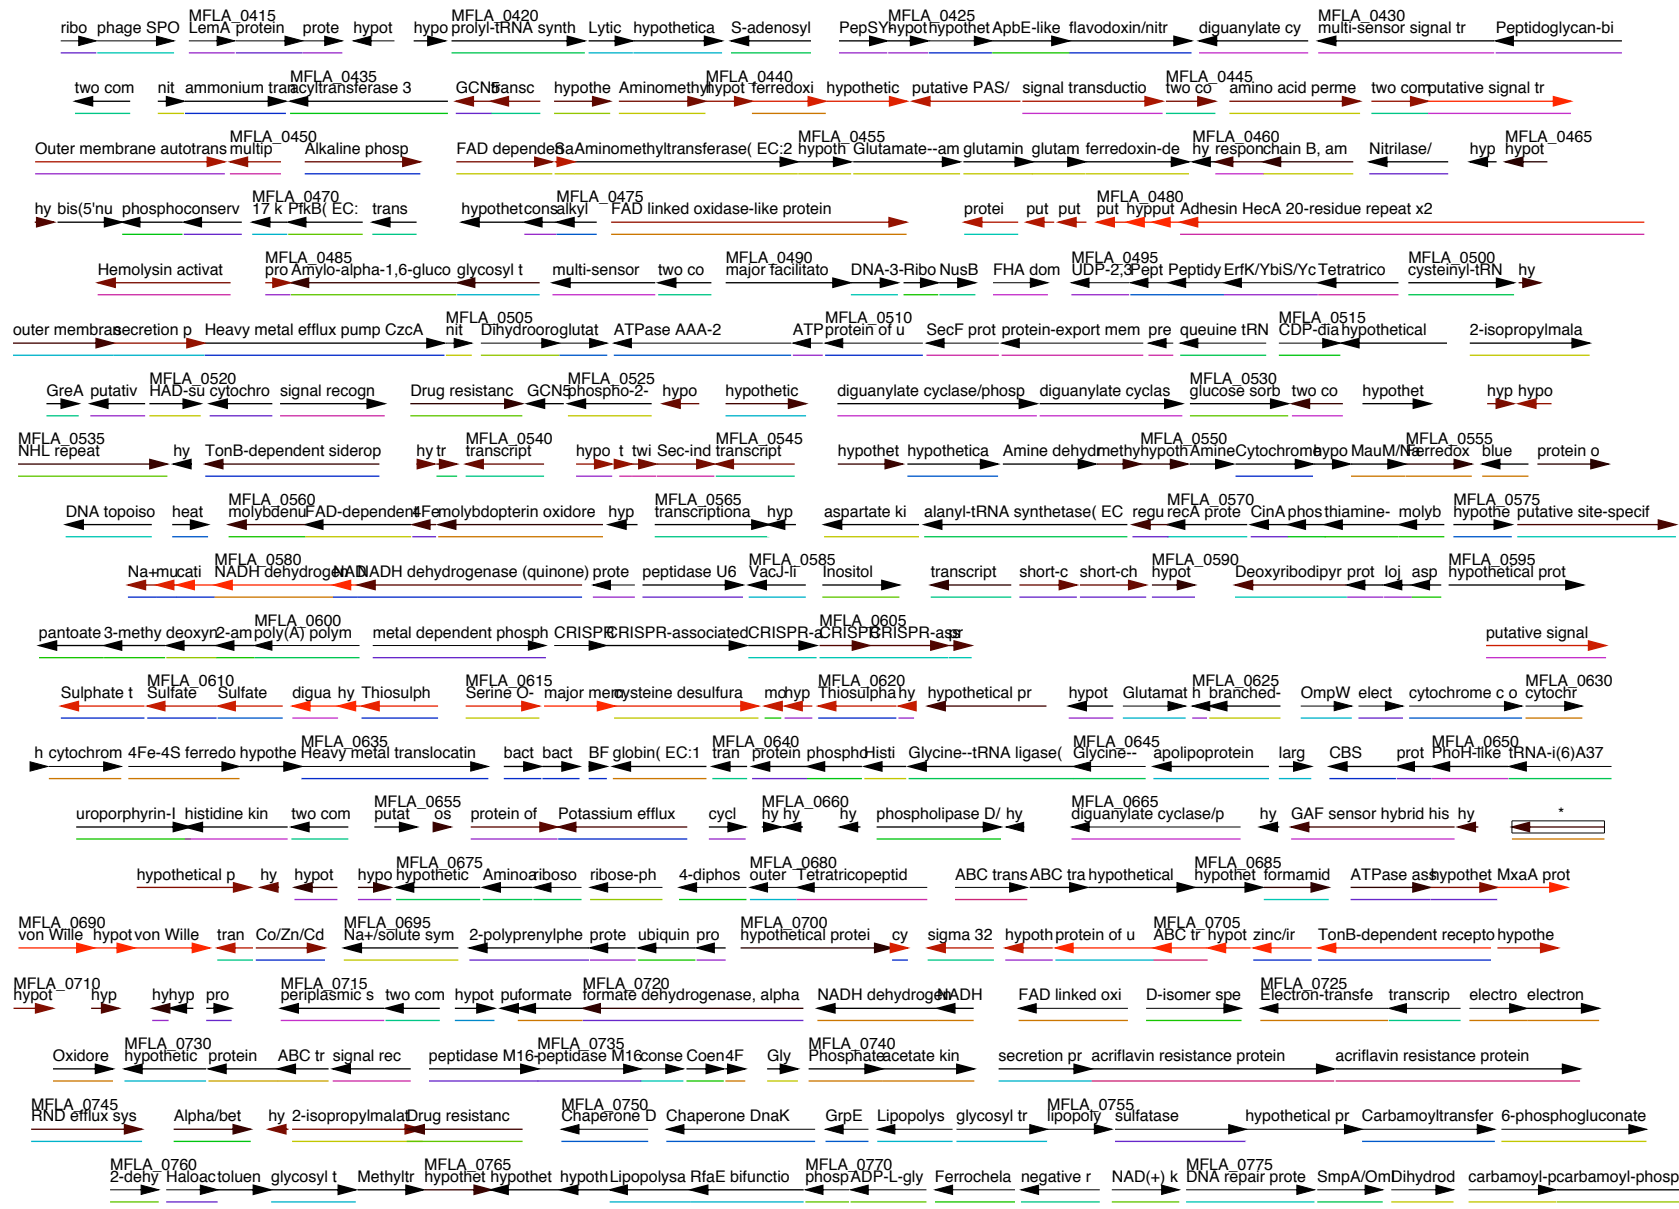

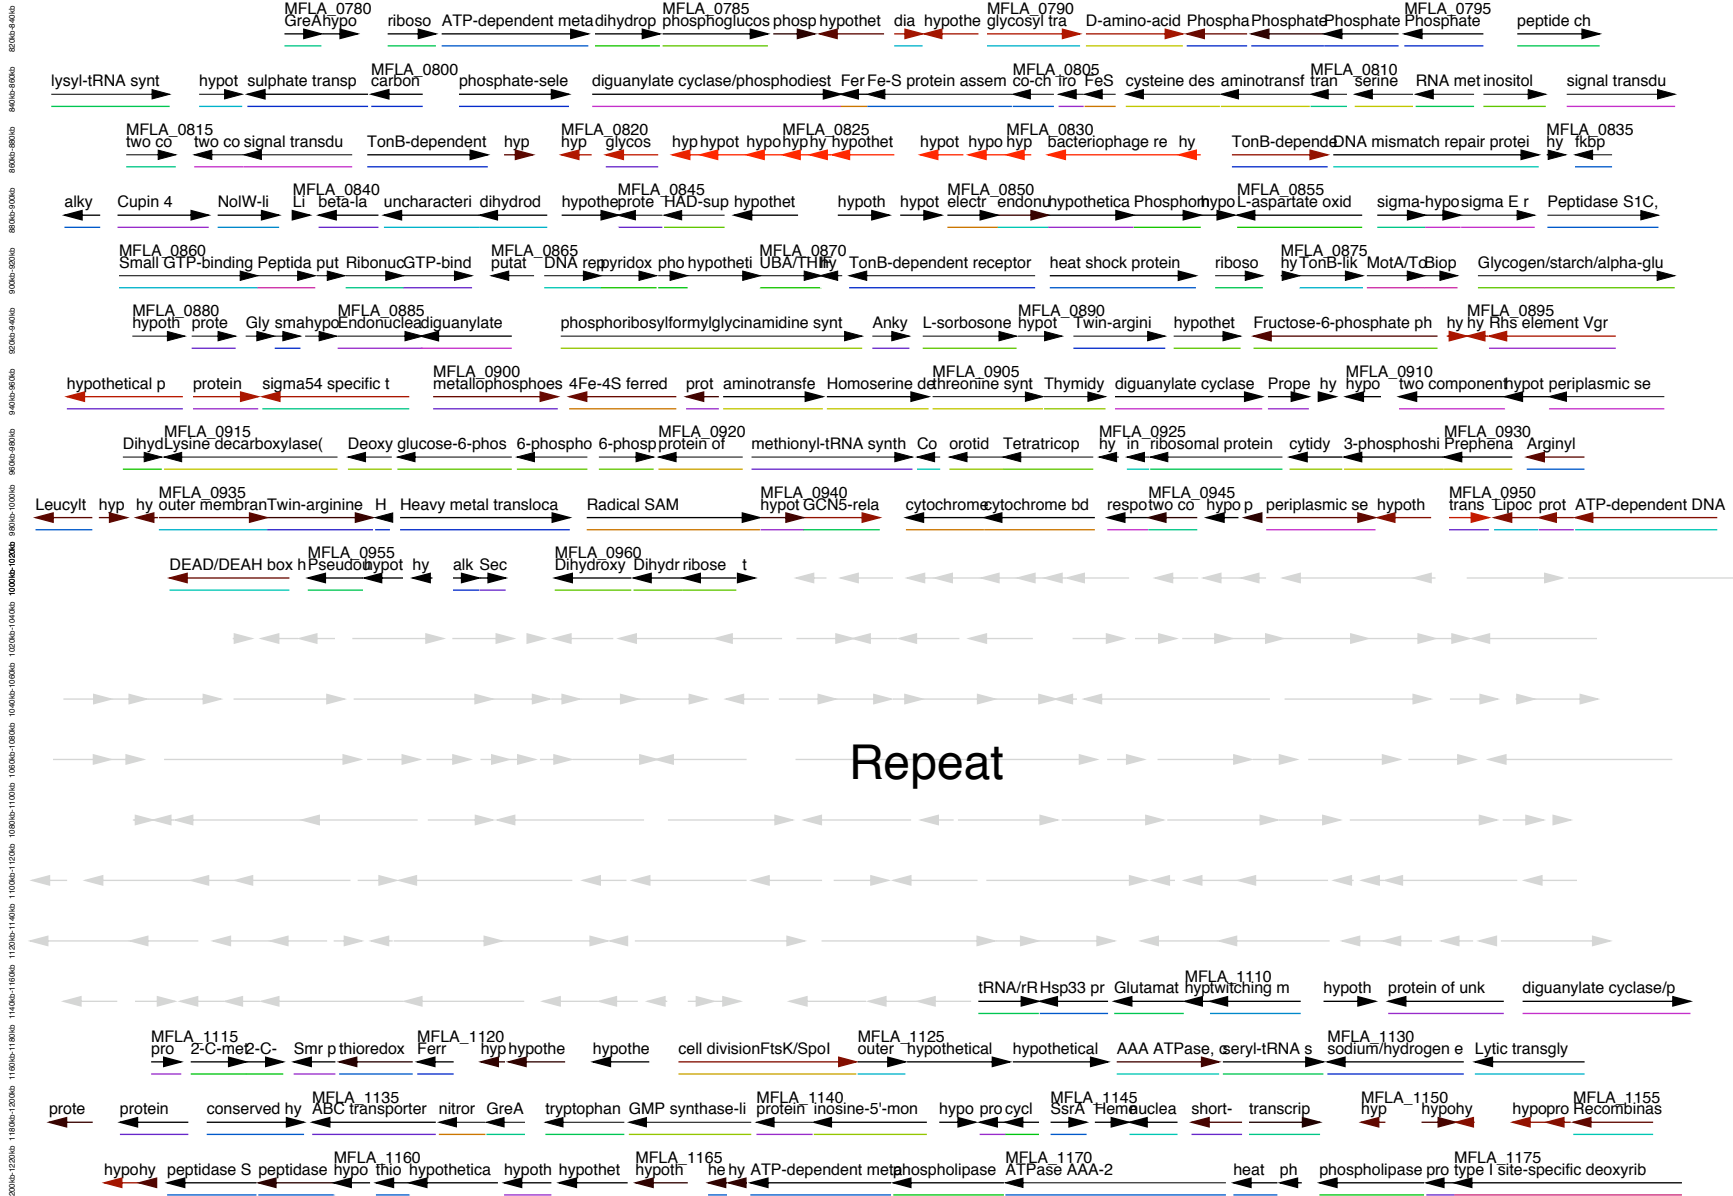

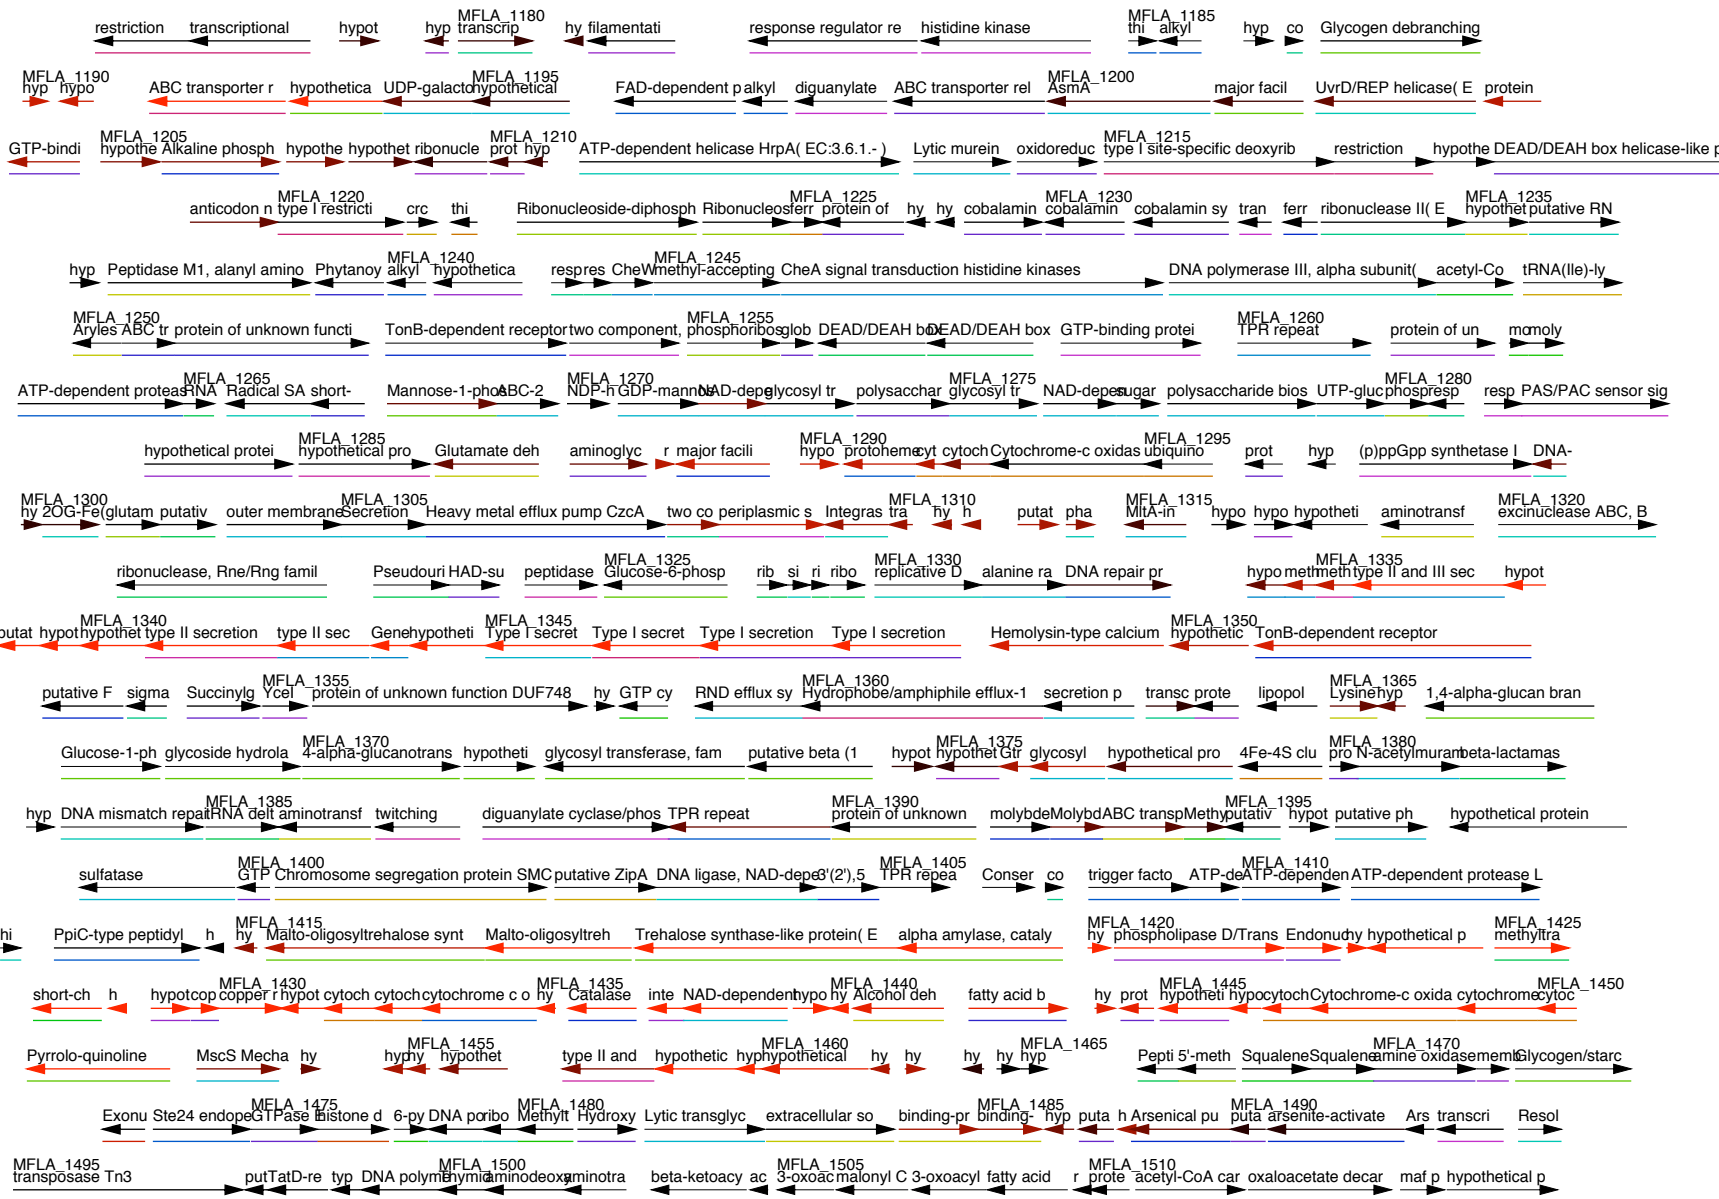

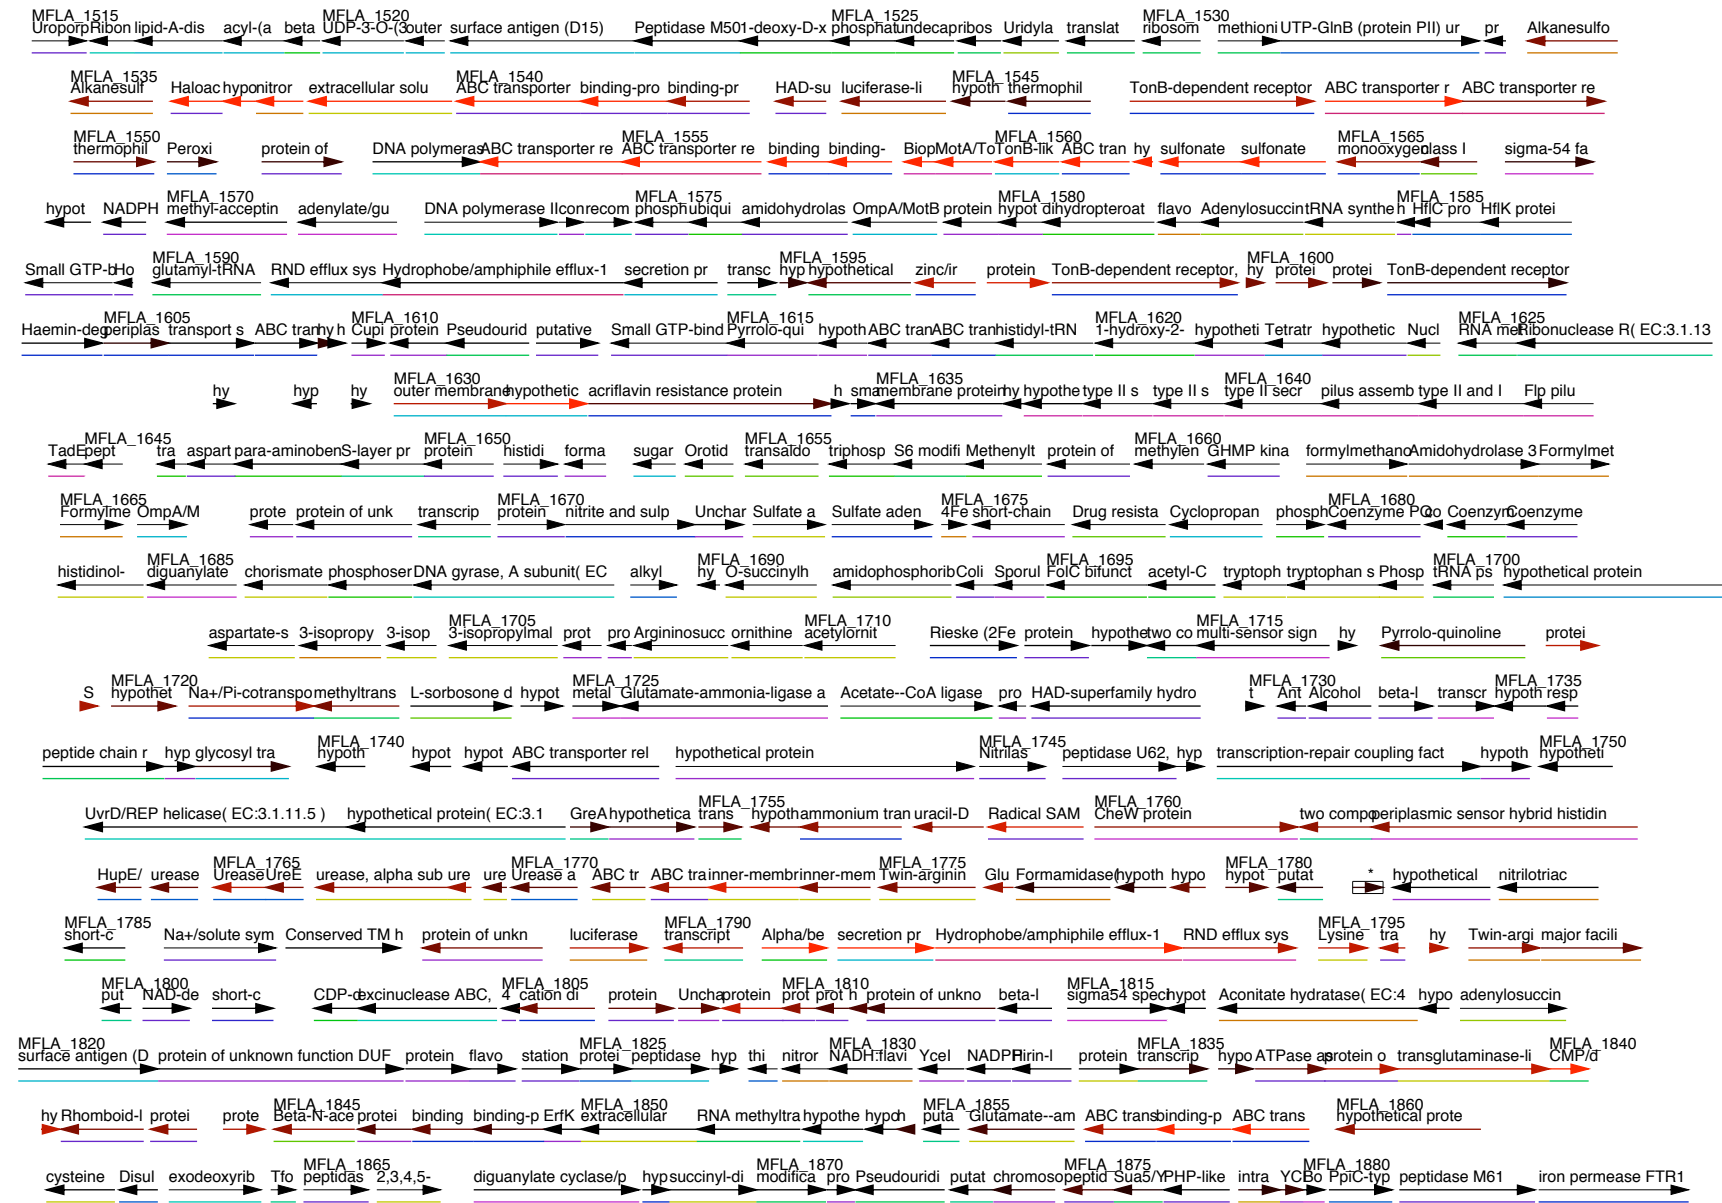

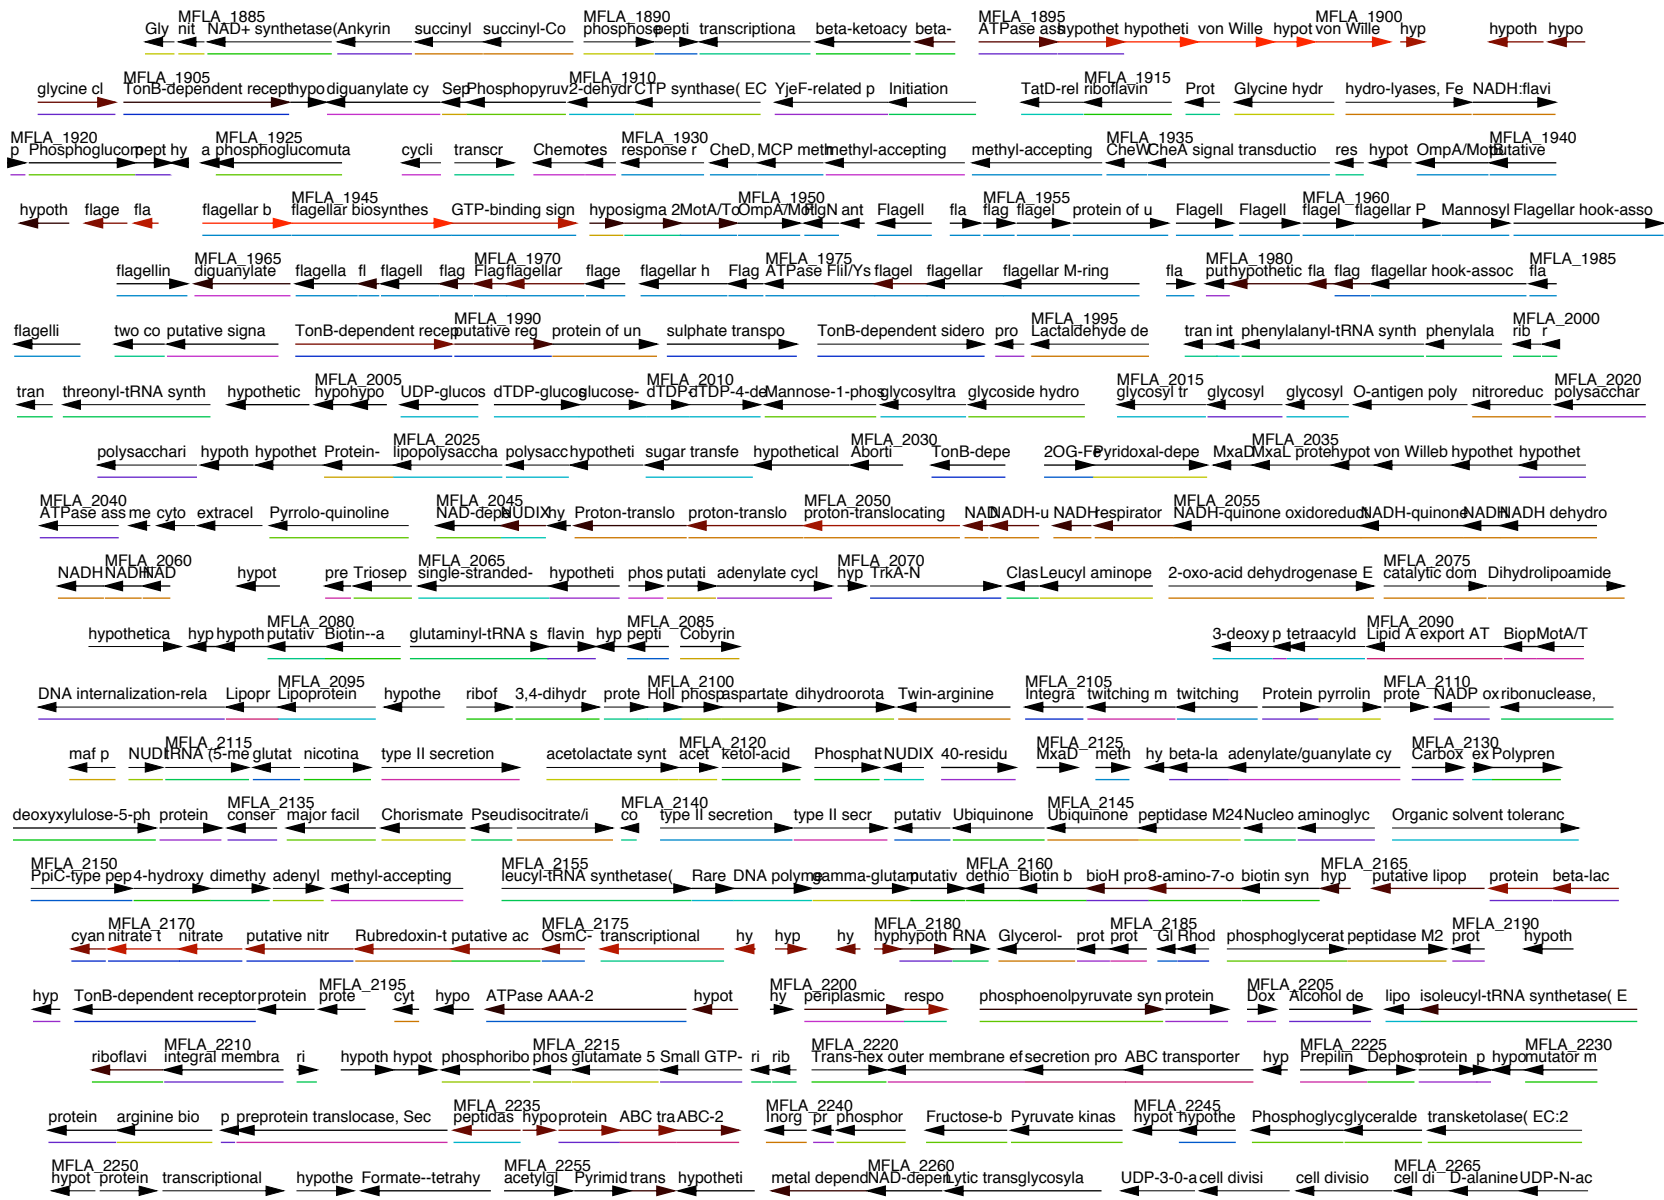

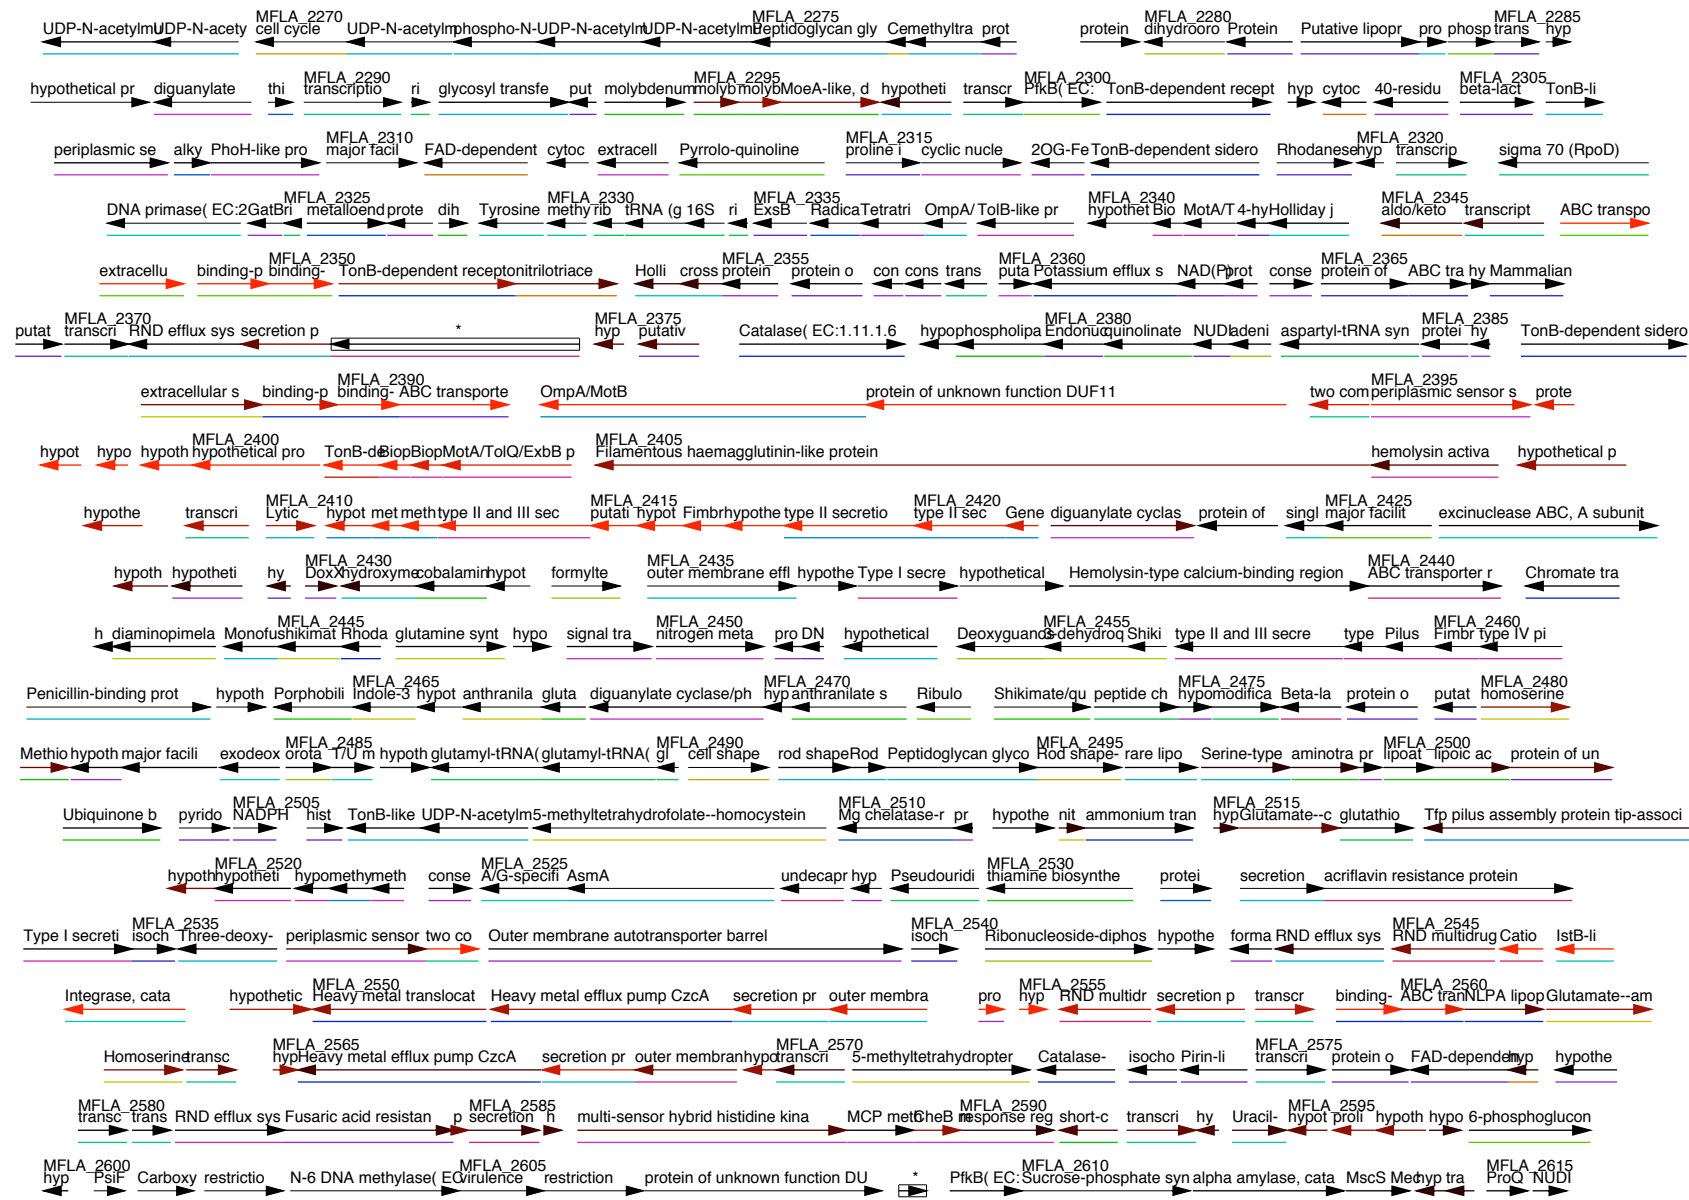



bp

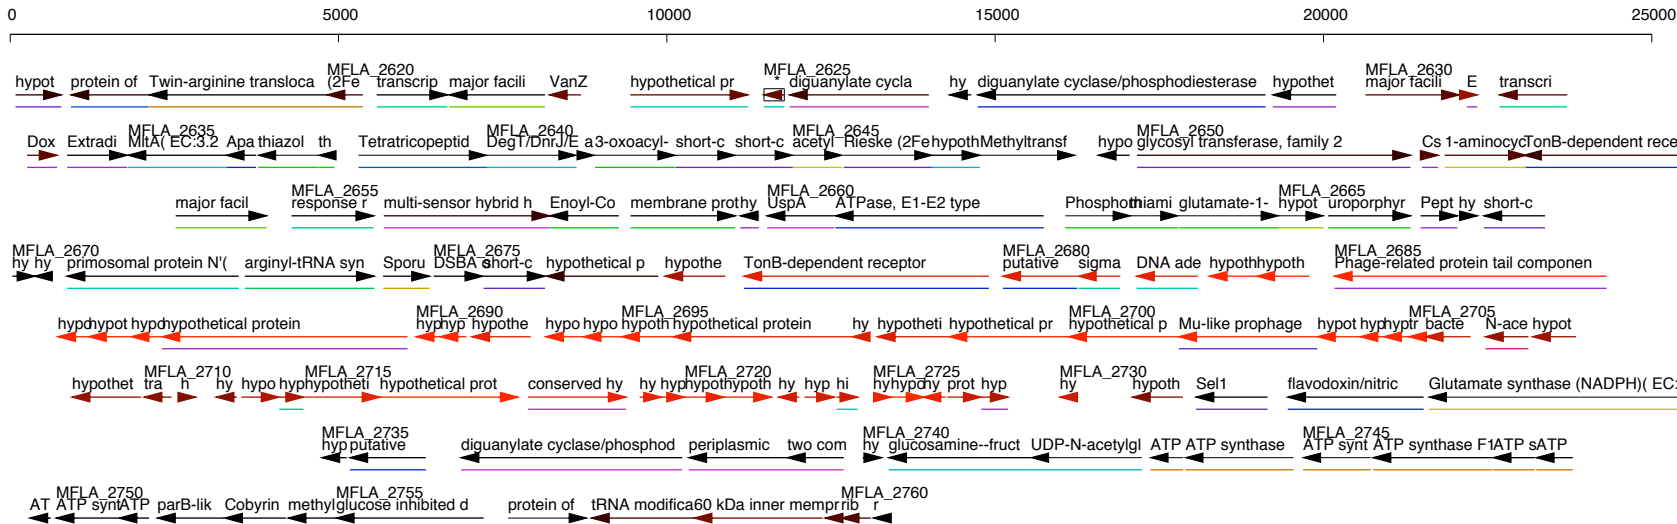

23000-23200 23180-23200 23160-23200 23140-23200 23120-23200 23100-23200 23080-23200 23060-23200 23040-23200 23020-23200 23000-23200 22980-23200 22960-23200 22940-23200 22920-23200 22900-23200 22880-23200 22860-23200 22840-23200 22820-23200 22800-23200 22780-23200 22760-23200 22740-23200 22720-23200 22700-23200 22680-23200 22660-23200 22640-23200 22620-23200 22600-23200 22580-23200 22560-23200 22540-23200 22520-23200 22500-23200 22480-23200 22460-23200 22440-23200 22420-23200 22400-23200 22380-23200 22360-23200 22340-23200 22320-23200 22300-23200 22280-23200 22260-23200 22240-23200 22220-23200 22200-23200 22180-23200 22160-23200 22140-23200 22120-23200 22100-23200 22080-23200 22060-23200 22040-23200 22020-23200 22000-23200 21980-23200 21960-23200 21940-23200 21920-23200 21900-23200 21880-23200 21860-23200 21840-23200 21820-23200 21800-23200 21780-23200 21760-23200 21740-23200 21720-23200 21700-23200 21680-23200 21660-23200 21640-23200 21620-23200 21600-23200 21580-23200 21560-23200 21540-23200 21520-23200 21500-23200 21480-23200 21460-23200 21440-23200 21420-23200 21400-23200 21380-23200 21360-23200 21340-23200 21320-23200 21300-23200 21280-23200 21260-23200 21240-23200 21220-23200 21200-23200 21180-23200 21160-23200 21140-23200 21120-23200 21100-23200 21080-23200 21060-23200 21040-23200 21020-23200 21000-23200 20980-23200 20960-23200 20940-23200 20920-23200 20900-23200 20880-23200 20860-23200 20840-23200 20820-23200 20800-23200 20780-23200 20760-23200 20740-23200 20720-23200 20700-23200 20680-23200 20660-23200 20640-23200 20620-23200 20600-23200 20580-23200 20560-23200 20540-23200 20520-23200 20500-23200 20480-23200 20460-23200 20440-23200 20420-23200 20400-23200 20380-23200 20360-23200 20340-23200 20320-23200 20300-23200 20280-23200 20260-23200 20240-23200 20220-23200 20200-23200 20180-23200 20160-23200 20140-23200 20120-23200 20100-23200 20080-23200 20060-23200 20040-23200 20020-23200 20000-23200 19980-23200 19960-23200 19940-23200 19920-23200 19900-23200 19880-23200 19860-23200 19840-23200 19820-23200 19800-23200 19780-23200 19760-23200 19740-23200 19720-23200 19700-23200 19680-23200 19660-23200 19640-23200 19620-23200 19600-23200 19580-23200 19560-23200 19540-23200 19520-23200 19500-23200 19480-23200 19460-23200 19440-23200 19420-23200 19400-23200 19380-23200 19360-23200 19340-23200 19320-23200 19300-23200 19280-23200 19260-23200 19240-23200 19220-23200 19200-23200 19180-23200 19160-23200 19140-23200 19120-23200 19100-23200 19080-23200 19060-23200 19040-23200 19020-23200 19000-23200 18980-23200 18960-23200 18940-23200 18920-23200 18900-23200 18880-23200 18860-23200 18840-23200 18820-23200 18800-23200 18780-23200 18760-23200 18740-23200 18720-23200 18700-23200 18680-23200 18660-23200 18640-23200 18620-23200 18600-23200 18580-23200 18560-23200 18540-23200 18520-23200 18500-23200 18480-23200 18460-23200 18440-23200 18420-23200 18400-23200 18380-23200 18360-23200 18340-23200 18320-23200 18300-23200 18280-23200 18260-23200 18240-23200 18220-23200 18200-23200 18180-23200 18160-23200 18140-23200 18120-23200 18100-23200 18080-23200 18060-23200 18040-23200 18020-23200 18000-23200 17980-23200 17960-23200 17940-23200 17920-23200 17900-23200 17880-23200 17860-23200 17840-23200 17820-23200 17800-23200 17780-23200 17760-23200 17740-23200 17720-23200 17700-23200 17680-23200 17660-23200 17640-23200 17620-23200 17600-23200 17580-23200 17560-23200 17540-23200 17520-23200 17500-23200 17480-23200 17460-23200 17440-23200 17420-23200 17400-23200 17380-23200 17360-23200 17340-23200 17320-23200 17300-23200 17280-23200 17260-23200 17240-23200 17220-23200 17200-23200 17180-23200 17160-23200 17140-23200 17120-23200 17100-23200 17080-23200 17060-23200 17040-23200 17020-23200 17000-23200 16980-23200 16960-23200 16940-23200 16920-23200 16900-23200 16880-23200 16860-23200 16840-23200 16820-23200 16800-23200 16780-23200 16760-23200 16740-23200 16720-23200 16700-23200 16680-23200 16660-23200 16640-23200 16620-23200 16600-23200 16580-23200 16560-23200 16540-23200 16520-23200 16500-23200 16480-23200 16460-23200 16440-23200 16420-23200 16400-23200 16380-23200 16360-23200 16340-23200 16320-23200 16300-23200 16280-23200 16260-23200 16240-23200 16220-23200 16200-23200 16180-23200 16160-23200 16140-23200 16120-23200 16100-23200 16080-23200 16060-23200 16040-23200 16020-23200 16000-23200 15980-23200 15960-23200 15940-23200 15920-23200 15900-23200 15880-23200 15860-23200 15840-23200 15820-23200 15800-23200 15780-23200 15760-23200 15740-23200 15720-23200 15700-23200 15680-23200 15660-23200 15640-23200 15620-23200 15600-23200 15580-23200 15560-23200 15540-23200 15520-23200 15500-23200 15480-23200 15460-23200 15440-23200 15420-23200 15400-23200 15380-23200 15360-23200 15340-23200 15320-23200 15300-23200 15280-23200 15260-23200 15240-23200 15220-23200 15200-23200 15180-23200 15160-23200 15140-23200 15120-23200 15100-23200 15080-23200 15060-23200 15040-23200 15020-23200 15000-23200 14980-23200 14960-23200 14940-23200 14920-23200 14900-23200 14880-23200 14860-23200 14840-23200 14820-23200 14800-23200 14780-23200 14760-23200 14740-23200 14720-23200 14700-23200 14680-23200 14660-23200 14640-23200 14620-23200 14600-23200 14580-23200 14560-23200 14540-23200 14520-23200 14500-23200 14480-23200 14460-23200 14440-23200 14420-23200 14400-23200 14380-23200 14360-23200 14340-23200 14320-23200 14300-23200 14280-23200 14260-23200 14240-23200 14220-23200 14200-23200 14180-23200 14160-23200 14140-23200 14120-23200 14100-23200 14080-23200 14060-23200 14040-23200 14020-23200 14000-23200 13980-23200 13960-23200 13940-23200 13920-23200 13900-23200 13880-23200 13860-23200 13840-23200 13820-23200 13800-23200 13780-23200 13760-23200 13740-23200 13720-23200 13700-23200 13680-23200 13660-23200 13640-23200 13620-23200 13600-23200 13580-23200 13560-23200 13540-23200 13520-23200 13500-23200 13480-23200 13460-23200 13440-23200 13420-23200 13400-23200 13380-23200 13360-23200 13340-23200 13320-23200 13300-23200 13280-23200 13260-23200 13240-23200 13220-23200 13200-23200 13180-23200 13160-23200 13140-23200 13120-23200 13100-23200 13080-23200 13060-23200 13040-23200 13020-23200 13000-23200 12980-23200 12960-23200 12940-23200 12920-23200 12900-23200 12880-23200 12860-23200 12840-23200 12820-23200 12800-23200 12780-23200 12760-23200 12740-23200 12720-23200 12700-23200 12680-23200 12660-23200 12640-23200 12620-23200 12600-23200 12580-23200 12560-23200 12540-23200 12520-23200 12500-23200 12480-23200 12460-23200 12440-23200 12420-23200 12400-23200 12380-23200 12360-23200 12340-23200 12320-23200 12300-23200 12280-23200 12260-23200 12240-23200 12220-23200 12200-23200 12180-23200 12160-23200 12140-23200 12120-23200 12100-23200 12080-23200 12060-23200 12040-23200 12020-23200 12000-23200 11980-23200 11960-23200 11940-23200 11920-23200 11900-23200 11880-23200 11860-23200 11840-23200 11820-23200 11800-23200 11780-23200 11760-23200 11740-23200 11720-23200 11700-23200 11680-23200 11660-23200 11640-23200 11620-23200 11600-23200 11580-23200 11560-23200 11540-23200 11520-23200 11500-23200 11480-23200 11460-23200 11440-23200 11420-23200 11400-23200 11380-23200 11360-23200 11340-23200 11320-23200 11300-23200 11280-23200 11260-23200 11240-23200 11220-23200 11200-23200 11180-23200 11160-23200 11140-23200 11120-23200 11100-23200 11080-23200 11060-23200 11040-23200 11020-23200 11000-23200 10980-23200 10960-23200 10940-23200 10920-23200 10900-23200 10880-23200 10860-23200 10840-23200 10820-23200 10800-23200 10780-23200 10760-23200 10740-23200 10720-23200 10700-23200 10680-23200 10660-23200 10640-23200 10620-23200 10600-23200 10580-23200 10560-23200 10540-23200 10520-23200 10500-23200 10480-23200 10460-23200 10440-23200 10420-23200 10400-23200 10380-23200 10360-23200 10340-23200 10320-23200 10300-23200 10280-23200 10260-23200 10240-23200 10220-23200 10200-23200 10180-23200 10160-23200 10140-23200 10120-23200 10100-23200 10080-23200 10060-23200 10040-23200 10020-23200 10000-23200 9980-23200 9960-23200 9940-23200 9920-23200 9900-23200 9880-23200 9860-23200 9840-23200 9820-23200 9800-23200 9780-23200 9760-23200 9740-23200 9720-23200 9700-23200 9680-23200 9660-23200 9640-23200 9620-23200 9600-23200 9580-23200 9560-23200 9540-23200 9520-23200 9500-23200 9480-23200 9460-23200 9440-23200 9420-23200 9400-23200 9380-23200 9360-23200 9340-23200 9320-23200 9300-23200 9280-23200 9260-23200 9240-23200 9220-23200 9200-23200 9180-23200 9160-23200 9140-23200 9120-23200 9100-23200 9080-23200 9060-23200 9040-23200 9020-23200 9000-23200 8980-23200 8960-23200 8940-23200 8920-23200 8900-23200 8880-23200 8860-23200 8840-23200 8820-23200 8800-23200 8780-23200 8760-23200 8740-23200 8720-23200 8700-23200 8680-23200 8660-23200 8640-23200 8620-23200 8600-23200 8580-23200 8560-23200 8540-23200 8520-23200 8500-23200 8480-23200 8460-23200 8440-23200 8420-23200 8400-23200 8380-23200 8360-23200 8340-23200 8320-23200 8300-23200 8280-23200 8260-23200 8240-23200 8220-23200 8200-23200 8180-23200 8160-23200 8140-23200 8120-23200 8100-23200 8080-23200 8060-23200 8040-23200 8020-23200 8000-23200 7980-23200 7960-23200 7940-23200 7920-23200 7900-23200 7880-23200 7860-23200 7840-23200 7820-23200 7800-23200 7780-23200 7760-23200 7740-23200 7720-23200 7700-23200 7680-23200 7660-23200 7640-23200 7620-23200 7600-23200 7580-23200 7560-23200 7540-23200 7520-23200 7500-23200 7480-23200 7460-23200 7440-23200 7420-23200 7400-23200 7380-23200 7360-23200 7340-23200 7320-23200 7300-23200 7280-23200 7260-23200 7240-23200 7220-23200 7200-23200 7180-23200 7160-23200 7140-23200 7120-23200 7100-23200 7080-23200 7060-23200 7040-23200 7020-23200 7000-23200 6980-23200 6960-23200 6940-23200 6920-23200 6900-23200 6880-23200 6860-23200 6840-23200 6820-23200 6800-23200 6780-23200 6760-23200 6740-23200 6720-23200 6700-23200 6680-23200 6660-23200 6640-23200 6620-23200 6600-23200 6580-23200 6560-23200 6540-23200 6520-23200 6500-23200 6480-23200 6460-23200 6440-23200 6420-23200 6400-23200 6380-23200 6360-23200 6340-23200 6320-23200 6300-23200 6280-23200 6260-23200 6240-23200 6220-23200 6200-23200 6180-23200 6160-23200 6140-23200 6120-23200 6100-23200 6080-23200 6060-23200 6040-23200 6020-23200 6000-23200 5980-23200 5960-23200 5940-23200 5920-23200 5900-23200 5880-23200 5860-23200 5840-23200 5820-23200 5800-23200 5780-23200 5760-23200 5740-23200 5720-23200 5700-23200 5680-23200 5660-23200 5640-23200 5620-23200 5600-23200 5580-23200 5560-23200 5540-23200 5520-23200 5500-23200 5480-23200 5460-23200 5440-23200 5420-23200 5400-23200 5380-23200 5360-23200 5340-23200 5320-23200 5300-23200 5280-23200 5260-23200 5240-23200 5220-23200 5200-23200 5180-23200 5160-23200 5140-23200 5120-23200 5100-23200 5080-23200 5060-23200 5040-23200 5020-23200 5000-23200 4980-23200 4960-23200 4940-23200 4920-23200 4900-23200 4880-23200 4860-23200 4840-23200 4820-23200 4800-23200 4780-23200 4760-23200 4740-23200 4720-23200 4700-23200 4680-23200 4660-23200 4640-23200 4620-23200 4600-23200 4580-23200 4560-23200 4540-23200 4520-23200 4500-23200 4480-23200 4460-23200 4440-23200 4420-23200 4400-23200 4380-23200 4360-23200 4340-23200 4320-23200 4300-23200 4280-23200 4260-23200 4240-23200 4220-23200 4200-23200 4180-23200 4160-23200 4140-23200 4120-23200 4100-23200 4080-23200 4060-23200 4040-23200 4020-23200 4000-23200 3980-23200 3960-23200 3940-23200 3920-23200 3900-23200 3880-23200 3860
