# Supplementary material
Source: PubMed Central journal article supplement (PMC2944507)
Supplement: supp_192_19_4859__4.pdf [file supp_192_19_4859__4.pdf]

## Supplementary File 4. List of primers, plasmids and strains

### Primers used in this study

| Name    | Sequence                   | Description                              |
|---------|----------------------------|------------------------------------------|
| fdh1Eco | CAGAATTC AAGCAAGCGGATTACGG | to amplify the 5' region of <i>fdh1A</i> |
| fdh1Kpn | CAGGTACCAGCCGACGCCGCAATAG  | to amplify the 5' region of <i>fdh1A</i> |
| fdh1Apa | AAGGGCCCACCCGTGCGCCGCGTGAT | to amplify the 3' region of <i>fdh1A</i> |
| fdh1Sac | CAGAGCTCCCATGCGGGCCATATCC  | to amplify the 3' region of <i>fdh1A</i> |
| fdh4Bgl | ACAGATCTGTCGCAACCTAAAGCAGC | to amplify the 5' region of <i>fdh4A</i> |
| fdh4Kpn | CAGGTACCAACTCGCCCAGCATGCG  | to amplify the 5' region of <i>fdh4A</i> |
| fdh4Apa | AAGGGCCCACAGCAAGACGCCTTGG  | to amplify the 3' region of <i>fdh4A</i> |
| fdh4Sac | CAGAGCTCAAGCAGCATGGGACACC  | to amplify the 3' region of <i>fdh4A</i> |
| gndBEco | CAGAATTCATGATCGCGTGCTGTTTG | to amplify the 5' region of <i>gndA</i>  |
| gndBNco | CACCATGGAGATGGGCCGAAACGTG  | to amplify the 5' region of <i>gndA</i>  |
| gndBApa | CAGGGCCCACGGTGAAGCTGGAATC  | to amplify the 3' region of <i>gndA</i>  |
| gndBSac | CAGAGCTCTTATACCTTGAAGTGGG  | to amplify the 3' region of <i>gndA</i>  |
| mgdEco  | AAGAATTCGCGCACGTTTGACCAAGC | to amplify the 5' region of <i>mgdC</i>  |
| mgdKpn  | CAGGTACCACCACGGGGATCAGGTG  | to amplify the 5' region of <i>mgdC</i>  |
| mgdApa  | AAGGGCCCTTACGCCGCGATCAATG  | to amplify the 3' region of <i>mgdC</i>  |
| mgdSac  | CAGAGCTCACTGTTGGCTGACAAGG  | to amplify the 3' region of <i>mgdC</i>  |

### Plasmids constructed in this study

| Name         | Description                                     |
|--------------|-------------------------------------------------|
| pLCRfdh1EK   | pCR2.1 containing the 5' region of <i>fdh1A</i> |
| pLCRfdh1AS   | pCR2.1 containing the 3' region of <i>fdh1A</i> |
| pLC184fdh1EK | pCM184 containing the 5' region of <i>fdh1A</i> |

|                |                                                             |
|----------------|-------------------------------------------------------------|
| pLC184fdh1EKAS | pCM184 containing the 5' and the 3' regions of <i>fdh1A</i> |
| pLCRfdh4BK     | pCR2.1 containing the 5' region of <i>fdh4A</i>             |
| pLCRfdh4AS     | pCR2.1 containing the 3' region of <i>fdh4A</i>             |
| pLC184fdh4BK   | pCM184 containing the 5' region of <i>fdh4A</i>             |
| pLC184fdh4BKAS | pCM184 containing the 5' and the 3' regions of <i>fdh4A</i> |
| pLCRgndBEN     | pCR2.1 containing the 5' region of <i>gndA</i>              |
| pLCRgndBAS     | pCR2.1 containing the 3' region of <i>gndA</i>              |
| pLC184gndBEN   | pCM184 containing the 5' region of <i>gndA</i>              |
| pLC184gndBENAS | pCM184 containing the 5' and the 3' regions of <i>gndA</i>  |
| pLCRmgdEK      | pCR2.1 containing the 5' region of <i>mgdC</i>              |
| pLCRmgdAS      | pCR2.1 containing the 3' region of <i>mgdC</i>              |
| pLC184mgdEK    | pCM184 containing the 5' region of <i>mgdC</i>              |
| pLC184mgdEKAS  | pCM184 containing the 5' and the 3' regions of <i>mgdC</i>  |

### Mutant strains constructed in this study

| Name       | Genotype                                     |
|------------|----------------------------------------------|
| FDH1A      | $\Delta fdh1A$ , Km <sup>R</sup>             |
| FDH4A      | $\Delta fdh4A$ , Km <sup>R</sup>             |
| GndA       | $\Delta gndA$ , Km <sup>R</sup>              |
| GndB       | $\Delta gndB$ , Km <sup>R</sup>              |
| GndB       | $\Delta gndB$                                |
| GndB/FDH1A | $\Delta gndB \Delta fdh1A$ , Km <sup>R</sup> |
| MgdC       | $\Delta mgdC$ , Km <sup>R</sup>              |
