# Supplementary material
Source: PubMed Central journal article supplement (PMC2944507)
Supplement: supp_192_19_4859__5.pdf [file supp_192_19_4859__5.pdf]

**Supplementary File 5. List of the non-detected proteins. COG, pFAM and TIGRFAM assignments are shown, and presence of predicted signal peptides and transmembrane helices are indicated.**

| Locus Tag | Product Name                                                                                     | AA Len. | COG                                 | pFAM                   | TIGRFam                | Signal Peptide | Transmembrane Helix |
|-----------|--------------------------------------------------------------------------------------------------|---------|-------------------------------------|------------------------|------------------------|----------------|---------------------|
| MFLA_1771 | amino acid/amide ABC transporter ATP-binding protein 2, HAAT family (TC 3.A.1.4.-) (IMGterm)     | 229     | Amino acid transport and metabolism | pfam00005              | TIGR03410              |                |                     |
| MFLA_0154 | amino acid/amide ABC transporter ATP-binding protein 2, HAAT family (TC 3.A.1.4.-) (IMGterm)     | 241     | Amino acid transport and metabolism | pfam00005              |                        |                |                     |
| MFLA_0153 | amino acid/amide ABC transporter ATP-binding protein 1, HAAT family (TC 3.A.1.4.-) (IMGterm)     | 238     | Amino acid transport and metabolism | pfam00005<br>pfam12399 |                        |                |                     |
| MFLA_2562 | L-glutamine synthetase (EC 6.3.1.2) (IMGterm)                                                    | 452     | Amino acid transport and metabolism | pfam00120              | TIGR00653<br>TIGR03105 |                |                     |
| MFLA_1856 | L-glutamine synthetase (EC 6.3.1.2) (IMGterm)                                                    | 453     | Amino acid transport and metabolism | pfam00120              | TIGR03105              |                |                     |
| MFLA_0101 | aminotransferase, class I and II                                                                 | 331     | Amino acid transport and metabolism | pfam00155              | TIGR01140              |                |                     |
| MFLA_0617 | cysteine desulfurase (EC 2.8.1.7) (IMGterm)                                                      | 621     | Amino acid transport and metabolism | pfam00266              | TIGR01979              |                |                     |
| MFLA_0695 | Na <sup>+</sup> /solute symporter                                                                | 492     | Amino acid transport and metabolism | pfam00474              |                        | *              | *                   |
| MFLA_1539 | extracellular solute-binding protein, family 5                                                   | 617     | Amino acid transport and metabolism | pfam00496              |                        | *              |                     |
| MFLA_1485 | binding-protein-dependent transport systems inner membrane component                             | 274     | Amino acid transport and metabolism | pfam00528              |                        | *              | *                   |
| MFLA_2513 | nitrogen regulatory protein P-II (IMGterm)                                                       | 112     | Amino acid transport and metabolism | pfam00543              |                        |                |                     |
| MFLA_1699 | phosphoribosylanthranilate isomerase (EC 5.3.1.24) (IMGterm)                                     | 192     | Amino acid transport and metabolism | pfam00697              |                        |                |                     |
| MFLA_1768 | urease, beta subunit                                                                             | 102     | Amino acid transport and metabolism | pfam00699              | TIGR00192              |                |                     |
| MFLA_0152 | amino acid/amide ABC transporter substrate-binding protein, HAAT family (TC 3.A.1.4.-) (IMGterm) | 432     | Amino acid transport and metabolism | pfam01094              | TIGR01409              | *              |                     |
| MFLA_0791 | D-amino-acid dehydrogenase                                                                       | 417     | Amino acid transport and metabolism | pfam01266              |                        |                |                     |
| MFLA_1390 | protein of unknown function DUF752                                                               | 622     | Amino acid transport and metabolism | pfam01266<br>pfam05430 | TIGR03197              |                |                     |
| MFLA_0225 | glycine cleavage system H protein                                                                | 123     | Amino acid transport and metabolism | pfam01597              | TIGR00527              |                |                     |
| MFLA_1365 | Lysine exporter protein (LYSE/YGGA)                                                              | 207     | Amino acid transport and metabolism | pfam01810              |                        |                | *                   |
| MFLA_1795 | Lysine exporter protein (LYSE/YGGA)                                                              | 212     | Amino acid transport and metabolism | pfam01810              |                        |                | *                   |
| MFLA_0393 | transglutaminase-like protein                                                                    | 263     | Amino acid transport and metabolism | pfam01841<br>pfam08379 |                        |                |                     |

|           |                                                                                           |      |                                       |                                     |                        |   |   |
|-----------|-------------------------------------------------------------------------------------------|------|---------------------------------------|-------------------------------------|------------------------|---|---|
| MFLA_0155 | amino acid/amide ABC transporter membrane protein 1, HAAT family (TC 3.A.1.4.-) (IMGterm) | 295  | Amino acid transport and metabolism   | pfam02653                           |                        |   |   |
| MFLA_1774 | amino acid/amide ABC transporter membrane protein 1, HAAT family (TC 3.A.1.4.-) (IMGterm) | 305  | Amino acid transport and metabolism   | pfam02653                           | TIGR03409              |   | * |
| MFLA_1773 | amino acid/amide ABC transporter membrane protein 2, HAAT family (TC 3.A.1.4.-) (IMGterm) | 389  | Amino acid transport and metabolism   | pfam02653                           | TIGR03408              |   | * |
| MFLA_0156 | amino acid/amide ABC transporter membrane protein 2, HAAT family (TC 3.A.1.4.-) (IMGterm) | 545  | Amino acid transport and metabolism   | pfam02653                           |                        |   |   |
| MFLA_1834 | protein of unknown function DUF540                                                        | 253  | Amino acid transport and metabolism   | pfam04401                           |                        |   | * |
| MFLA_1441 | Alcohol dehydrogenase GroES-like protein                                                  | 390  | Amino acid transport and metabolism   | pfam08240                           |                        |   |   |
| MFLA_2652 | 1-aminocyclopropane-1-carboxylate deaminase-like protein                                  | 350  | Amino acid transport and metabolism   |                                     |                        |   |   |
| MFLA_0446 | amino acid permease-associated region                                                     | 562  | Amino acid transport and metabolism   |                                     |                        | * | * |
| MFLA_0615 | serine O-acetyltransferase (EC 2.3.1.30) (IMGterm)                                        | 317  | Amino acid transport and metabolism   |                                     | TIGR01172              |   |   |
| MFLA_2347 | carbohydrate ABC transporter ATP-binding protein, CUT1 family (TC 3.A.1.1.-) (IMGterm)    | 379  | Carbohydrate transport and metabolism | pfam00005<br>pfam08402              |                        |   |   |
| MFLA_2654 | major facilitator superfamily MFS_1                                                       | 391  | Carbohydrate transport and metabolism | pfam00083<br>pfam07690              |                        | * | * |
| MFLA_1416 | maltooligosyl trehalose synthase (EC 5.4.99.15) (IMGterm)                                 | 941  | Carbohydrate transport and metabolism | pfam00128                           | TIGR02401              |   |   |
| MFLA_1418 | trehalose synthase (EC:5.4.99.16) (IMGterm)                                               | 1134 | Carbohydrate transport and metabolism | pfam00128                           | TIGR02456<br>TIGR02457 |   |   |
| MFLA_1417 | maltooligosyl trehalose hydrolase (EC 3.2.1.141) (IMGterm)                                | 629  | Carbohydrate transport and metabolism | pfam00128<br>pfam02922<br>pfam11941 | TIGR02402              |   |   |
| MFLA_1419 | alpha amylase, catalytic region                                                           | 708  | Carbohydrate transport and metabolism | pfam00128<br>pfam11896              |                        |   |   |
| MFLA_0179 | MIP family channel proteins                                                               | 229  | Carbohydrate transport and metabolism | pfam00230                           | TIGR00861              | * |   |
| MFLA_0962 | ribose 5-phosphate isomerase                                                              | 230  | Carbohydrate transport and metabolism | pfam00455<br>pfam06026              | TIGR00021              |   |   |
| MFLA_2349 | carbohydrate ABC transporter membrane protein 1, CUT1 family (TC 3.A.1.1.-) (IMGterm)     | 307  | Carbohydrate transport and metabolism | pfam00528                           |                        |   | * |
| MFLA_2350 | carbohydrate ABC transporter membrane protein 2, CUT1 family (TC 3.A.1.1.-)               | 272  | Carbohydrate transport and metabolism | pfam00528                           |                        |   | * |

|           |                                                                                              |     |                                                            |                                     |                        |   |   |   |
|-----------|----------------------------------------------------------------------------------------------|-----|------------------------------------------------------------|-------------------------------------|------------------------|---|---|---|
|           | (IMGterm)                                                                                    |     |                                                            |                                     |                        |   |   |   |
| MFLA_1566 | class II aldolase/adducin-like protein                                                       | 242 | Carbohydrate transport and metabolism                      | pfam00596                           |                        |   |   |   |
| MFLA_1451 | Pyrrolo-quinoline quinone                                                                    | 616 | Carbohydrate transport and metabolism                      | pfam01011<br>pfam10527<br>pfam10535 | TIGR03075              | * | * |   |
| MFLA_2348 | carbohydrate ABC transporter substrate-binding protein, CUT1 family (TC 3.A.1.1.-) (IMGterm) | 363 | Carbohydrate transport and metabolism                      | pfam01547                           |                        | * |   |   |
| MFLA_2136 | major facilitator superfamily MFS_1                                                          | 383 | Carbohydrate transport and metabolism                      | pfam03825                           |                        |   |   | * |
| MFLA_2622 | major facilitator superfamily MFS_1                                                          | 411 | Carbohydrate transport and metabolism                      | pfam05977                           |                        |   |   | * |
| MFLA_1677 | Drug resistance transporter Bcr/CflA subfamily                                               | 401 | Carbohydrate transport and metabolism                      | pfam07690                           | TIGR00710              | * | * |   |
| MFLA_0749 | Drug resistance transporter Bcr/CflA subfamily                                               | 498 | Carbohydrate transport and metabolism                      | pfam07690                           | TIGR00710<br>TIGR00880 |   |   | * |
| MFLA_0523 | Drug resistance transporter EmrB/QacA subfamily                                              | 481 | Carbohydrate transport and metabolism                      | pfam07690                           | TIGR00711              |   |   | * |
| MFLA_1201 | major facilitator superfamily MFS_1                                                          | 383 | Carbohydrate transport and metabolism                      | pfam07690                           |                        |   |   | * |
| MFLA_1193 | hypothetical protein                                                                         | 397 | Carbohydrate transport and metabolism                      |                                     |                        |   |   |   |
| MFLA_2284 | phosphoheptose isomerase (EC 5.3.1.-) (IMGterm)                                              | 197 | Carbohydrate transport and metabolism                      |                                     | TIGR00441              |   |   |   |
| MFLA_2495 | cell elongation-specific peptidoglycan biosynthesis regulator RodA (IMGterm)                 | 364 | Cell cycle control, cell division, chromosome partitioning | pfam01098                           | TIGR02210              | * | * |   |
| MFLA_1221 | camphor resistance protein CrcB (IMGterm)                                                    | 128 | Cell cycle control, cell division, chromosome partitioning | pfam02537                           | TIGR00494              |   |   | * |
| MFLA_1878 | intracellular septation protein A                                                            | 179 | Cell cycle control, cell division, chromosome partitioning | pfam04279                           | TIGR00997              | * | * |   |
| MFLA_1908 | cell division protein FtsB (IMGterm)                                                         | 106 | Cell cycle control, cell division, chromosome partitioning | pfam04977                           |                        |   |   |   |
| MFLA_2276 | Cell division protein, FtsL -like protein                                                    | 86  | Cell cycle control, cell division, chromosome partitioning | pfam04999                           | TIGR02209              | * | * |   |
| MFLA_1947 | hypothetical protein                                                                         | 145 | Cell cycle control, cell division, chromosome partitioning |                                     |                        |   |   |   |
| MFLA_1336 | type II and III secretion system protein                                                     | 653 | Cell motility                                              | pfam00263<br>pfam03958<br>pfam07660 |                        | * |   |   |
| MFLA_0076 | type II and III secretion system protein                                                     | 539 | Cell motility                                              | pfam00263<br>pfam07655              | TIGR02519              |   |   |   |
| MFLA_2419 | type II secretion system protein E                                                           | 559 | Cell motility                                              | pfam00437<br>pfam05157              |                        |   |   |   |
| MFLA_1946 | GTP-binding signal recognition particle SRP54, G-domain                                      | 536 | Cell motility                                              | pfam00448                           | TIGR03499              |   |   |   |
| MFLA_1958 | Flagellar basal-body rod FlgF                                                                | 246 | Cell motility                                              | pfam00460                           | TIGR02490              |   |   |   |

|           |                                                                   |      |                                        |           |           |   |   |
|-----------|-------------------------------------------------------------------|------|----------------------------------------|-----------|-----------|---|---|
|           |                                                                   |      |                                        | pfam06429 | TIGR03506 |   |   |
| MFLA_2420 | type II secretion system protein                                  | 393  | Cell motility                          | pfam00482 |           |   | * |
| MFLA_1342 | type II secretion system protein                                  | 395  | Cell motility                          | pfam00482 |           |   | * |
| MFLA_0079 | type II secretion system protein                                  | 401  | Cell motility                          | pfam00482 |           |   |   |
| MFLA_1260 | TPR repeat                                                        | 573  | Cell motility                          | pfam00515 | TIGR02466 |   |   |
| MFLA_2392 | OmpA/MotB                                                         | 1402 | Cell motility                          | pfam00691 |           | * |   |
| MFLA_1945 | flagellar biosynthesis protein FlhA                               | 690  | Cell motility                          | pfam00771 | TIGR01398 | * | * |
| MFLA_1968 | flagellar biosynthetic protein FliP                               | 250  | Cell motility                          | pfam00813 | TIGR01103 | * | * |
| MFLA_1966 | flagellar biosynthetic protein FliR                               | 266  | Cell motility                          | pfam01311 | TIGR01400 |   | * |
| MFLA_1944 | flagellar biosynthetic protein FlhB                               | 381  | Cell motility                          | pfam01312 | TIGR00328 |   | * |
| MFLA_1967 | flagellar biosynthetic protein FliQ                               | 89   | Cell motility                          | pfam01313 | TIGR01402 |   | * |
| MFLA_1974 | Flagellar export FliJ                                             | 150  | Cell motility                          | pfam02050 | TIGR02473 |   |   |
| MFLA_1960 | flagellar L-ring protein                                          | 222  | Cell motility                          | pfam02107 |           | * |   |
| MFLA_1976 | flagellar assembly protein FliH                                   | 226  | Cell motility                          | pfam02108 |           |   |   |
| MFLA_1985 | flagellar protein FlaG protein                                    | 117  | Cell motility                          | pfam03646 |           |   |   |
| MFLA_1969 | flagellar biosynthesis protein, FliO                              | 142  | Cell motility                          | pfam04347 | TIGR03500 | * | * |
| MFLA_0084 | methylation                                                       | 247  | Cell motility                          | pfam07963 | TIGR02532 | * |   |
| MFLA_2413 | methylation                                                       | 157  | Cell motility                          | pfam07963 | TIGR02532 |   | * |
| MFLA_2421 | General secretion pathway protein G                               | 142  | Cell motility                          | pfam07963 | TIGR01710 |   | * |
|           |                                                                   |      |                                        | pfam08334 | TIGR02532 |   |   |
| MFLA_1343 | General secretion pathway protein G                               | 160  | Cell motility                          | pfam07963 | TIGR01710 |   | * |
|           |                                                                   |      |                                        | pfam08334 | TIGR02532 |   |   |
| MFLA_1334 | methylation                                                       | 133  | Cell motility                          | pfam07963 | TIGR01710 |   | * |
|           |                                                                   |      |                                        | pfam08334 | TIGR02532 |   |   |
| MFLA_2522 | methylation                                                       | 179  | Cell motility                          | pfam07963 | TIGR02532 | * | * |
|           |                                                                   |      |                                        | pfam12019 |           |   |   |
| MFLA_2412 | methylation                                                       | 126  | Cell motility                          | pfam08334 | TIGR01710 | * | * |
|           |                                                                   |      |                                        |           | TIGR02532 |   |   |
| MFLA_1953 | Flageller protein FlgA                                            | 235  | Cell motility                          | pfam08666 | TIGR03170 | * |   |
| MFLA_1333 | hypothetical protein                                              | 164  | Cell motility                          |           |           | * | * |
| MFLA_0717 | hypothetical protein                                              | 170  | Cell motility                          |           |           | * | * |
| MFLA_2411 | hypothetical protein                                              | 192  | Cell motility                          |           |           | * | * |
| MFLA_2557 | secretion protein HlyD                                            | 379  | Cell wall/membrane/envelope biogenesis | pfam00529 | TIGR01730 | * |   |
| MFLA_1792 | secretion protein HlyD                                            | 412  | Cell wall/membrane/envelope biogenesis | pfam00529 | TIGR01730 | * |   |
| MFLA_2552 | secretion protein HlyD                                            | 410  | Cell wall/membrane/envelope biogenesis | pfam00529 | TIGR00999 |   | * |
|           |                                                                   |      |                                        |           | TIGR01730 |   |   |
| MFLA_0790 | 1,2-diacylglycerol 3-glucosyltransferase (EC 2.4.1.157) (IMGterm) | 400  | Cell wall/membrane/envelope biogenesis | pfam00534 |           |   |   |
| MFLA_0487 | glycosyl transferase, group 1                                     | 355  | Cell wall/membrane/envelope biogenesis | pfam00534 |           |   |   |

|           |                                                                                     |     |                                        |                        |           |   |   |
|-----------|-------------------------------------------------------------------------------------|-----|----------------------------------------|------------------------|-----------|---|---|
| MFLA_0226 | murein-DD-endopeptidase. Serine peptidase. MEROPS family S11 (IMGterm)              | 336 | Cell wall/membrane/envelope biogenesis | pfam00768              |           | * |   |
| MFLA_0646 | apolipoprotein N-acyltransferase                                                    | 497 | Cell wall/membrane/envelope biogenesis | pfam00795              | TIGR00546 | * | * |
| MFLA_0388 | NLP/P60                                                                             | 170 | Cell wall/membrane/envelope biogenesis | pfam00877              |           | * |   |
| MFLA_2444 | Monofunctional biosynthetic peptidoglycan transglycosylase                          | 229 | Cell wall/membrane/envelope biogenesis | pfam00912              | TIGR02070 |   | * |
| MFLA_1452 | MscS Mechanosensitive ion channel                                                   | 355 | Cell wall/membrane/envelope biogenesis | pfam00924              |           |   | * |
| MFLA_1269 | ABC-2                                                                               | 264 | Cell wall/membrane/envelope biogenesis | pfam01061              |           |   | * |
| MFLA_2207 | signal peptidase II (EC:3.4.23.36). Aspartic peptidase. MEROPS family A08 (IMGterm) | 151 | Cell wall/membrane/envelope biogenesis | pfam01252              | TIGR00077 |   | * |
| MFLA_2260 | NAD-dependent epimerase/dehydratase                                                 | 321 | Cell wall/membrane/envelope biogenesis | pfam01370              |           |   |   |
| MFLA_1438 | NAD-dependent epimerase/dehydratase                                                 | 450 | Cell wall/membrane/envelope biogenesis | pfam01370              |           |   | * |
| MFLA_2410 | Lytic transglycosylase, catalytic                                                   | 208 | Cell wall/membrane/envelope biogenesis | pfam01464              |           |   | * |
| MFLA_1482 | Lytic transglycosylase, catalytic                                                   | 518 | Cell wall/membrane/envelope biogenesis | pfam01464<br>pfam01476 |           | * |   |
| MFLA_2235 | peptidase M23B                                                                      | 288 | Cell wall/membrane/envelope biogenesis | pfam01551              |           | * | * |
| MFLA_2553 | outer membrane efflux protein                                                       | 421 | Cell wall/membrane/envelope biogenesis | pfam02321              |           | * |   |
| MFLA_0502 | outer membrane efflux protein                                                       | 433 | Cell wall/membrane/envelope biogenesis | pfam02321              |           | * | * |
| MFLA_1630 | outer membrane efflux protein                                                       | 483 | Cell wall/membrane/envelope biogenesis | pfam02321              |           | * |   |
| MFLA_2544 | RND efflux system, outer membrane lipoprotein, NodT                                 | 467 | Cell wall/membrane/envelope biogenesis | pfam02321              | TIGR01845 | * |   |
| MFLA_1345 | Type I secretion outer membrane protein, TolC                                       | 455 | Cell wall/membrane/envelope biogenesis | pfam02321              | TIGR01844 | * | * |
| MFLA_0704 | protein of unknown function DUF214                                                  | 423 | Cell wall/membrane/envelope biogenesis | pfam02687              |           | * | * |
| MFLA_1194 | UDP-galactopyranose mutase                                                          | 379 | Cell wall/membrane/envelope biogenesis | pfam03275              | TIGR00031 |   |   |
| MFLA_2306 | outer membrane transport energization protein TonB (TC 2.C.1.1.1) (IMGterm)         | 246 | Cell wall/membrane/envelope biogenesis | pfam03544              | TIGR01352 |   |   |

|           |                                                                             |     |                                        |                        |                        |   |   |
|-----------|-----------------------------------------------------------------------------|-----|----------------------------------------|------------------------|------------------------|---|---|
| MFLA_1560 | outer membrane transport energization protein TonB (TC 2.C.1.1.1) (IMGterm) | 276 | Cell wall/membrane/envelope biogenesis | pfam03544              | TIGR01352              |   |   |
| MFLA_2265 | cell division protein FtsQ (IMGterm)                                        | 243 | Cell wall/membrane/envelope biogenesis | pfam03799<br>pfam08478 |                        |   | * |
| MFLA_2493 | Rod shape-determining protein MreD                                          | 159 | Cell wall/membrane/envelope biogenesis | pfam04093              | TIGR03426              |   | * |
| MFLA_0422 | hypothetical protein                                                        | 381 | Cell wall/membrane/envelope biogenesis | pfam04101              |                        |   |   |
| MFLA_0798 | hypothetical protein                                                        | 185 | Cell wall/membrane/envelope biogenesis | pfam04519              |                        |   |   |
| MFLA_0059 | protein of unknown function DUF583                                          | 100 | Cell wall/membrane/envelope biogenesis | pfam04519              |                        |   |   |
| MFLA_0951 | Lipocalin-like protein                                                      | 189 | Cell wall/membrane/envelope biogenesis | pfam08212              |                        | * |   |
| MFLA_2298 | hypothetical protein                                                        | 300 | Cell wall/membrane/envelope biogenesis | pfam08310              |                        |   |   |
| MFLA_1378 | hypothetical protein                                                        | 537 | Cell wall/membrane/envelope biogenesis |                        |                        | * | * |
| MFLA_1631 | hypothetical protein                                                        | 350 | Cell wall/membrane/envelope biogenesis |                        |                        |   | * |
| MFLA_0730 | hypothetical protein                                                        | 351 | Cell wall/membrane/envelope biogenesis |                        |                        |   | * |
| MFLA_1195 | hypothetical protein                                                        | 420 | Cell wall/membrane/envelope biogenesis |                        |                        |   |   |
| MFLA_0503 | secretion protein HlyD                                                      | 390 | Cell wall/membrane/envelope biogenesis |                        | TIGR01730              | * |   |
| MFLA_1476 | histone deacetylase superfamily                                             | 307 | Chromatin structure and dynamics       | pfam00850              |                        |   |   |
| MFLA_0573 | thiamine-phosphate kinase (IMGterm)                                         | 318 | Coenzyme transport and metabolism      | pfam00586<br>pfam02769 | TIGR01379              |   |   |
| MFLA_0322 | uroporphyrinogen-III C-methyltransferase (EC 2.1.1.107) (IMGterm)           | 277 | Coenzyme transport and metabolism      | pfam00590              | TIGR01469              |   |   |
| MFLA_0054 | 4-hydroxybenzoate octaprenyltransferase (EC 2.5.1.-) (IMGterm)              | 296 | Coenzyme transport and metabolism      | pfam01040              | TIGR01474<br>TIGR01475 |   |   |
| MFLA_1502 | aminodeoxychorismate lyase apoprotein (EC 4.1.3.38) (IMGterm)               | 271 | Coenzyme transport and metabolism      | pfam01063              | TIGR03461              |   |   |
| MFLA_0599 | 2-amino-4-hydroxy-6-hydroxymethyl-dihydropteridine pyrophosphokinase        | 163 | Coenzyme transport and metabolism      | pfam01288              | TIGR01498              |   |   |
| MFLA_2159 | nicotinate-nucleotide adenylyltransferase (EC 2.7.7.18) (IMGterm)           | 237 | Coenzyme transport and metabolism      | pfam01467              | TIGR00125<br>TIGR00482 |   |   |
| MFLA_2160 | dethiobiotin synthase                                                       | 228 | Coenzyme transport and metabolism      | pfam01656              | TIGR00347              |   |   |
| MFLA_0103 | adenosylcobyrinic acid synthase                                             | 483 | Coenzyme transport and metabolism      | pfam01656              | TIGR00313              |   |   |

|           |                                                               |      |                                   |                        |           |   |   |
|-----------|---------------------------------------------------------------|------|-----------------------------------|------------------------|-----------|---|---|
|           | (glutamine-hydrolysing) (EC 6.3.5.10)<br>(IMGterm)            |      |                                   | pfam07685              |           |   |   |
| MFLA_0594 | aspartate 1-decarboxylase                                     | 126  | Coenzyme transport and metabolism | pfam02261              | TIGR00223 |   |   |
| MFLA_0099 | cobalamin-5'-phosphate synthase (EC 2.7.8.26) (IMGterm)       | 254  | Coenzyme transport and metabolism | pfam02654              | TIGR00317 | * |   |
| MFLA_2500 | lipoate-protein ligase B                                      | 218  | Coenzyme transport and metabolism | pfam03099              | TIGR00214 |   |   |
| MFLA_0102 | adenosylcobinamide-phosphate synthase (EC 6.3.1.10) (IMGterm) | 317  | Coenzyme transport and metabolism | pfam03186              | TIGR00380 |   |   |
| MFLA_2296 | molybdopterin-guanine dinucleotide biosynthesis protein B     | 182  | Coenzyme transport and metabolism | pfam03205              | TIGR00176 |   |   |
| MFLA_0618 | molybdenum-pterin binding domain                              | 71   | Coenzyme transport and metabolism | pfam03459              | TIGR00638 |   |   |
| MFLA_0163 | Methyltransferase type 11                                     | 149  | Coenzyme transport and metabolism | pfam03848              |           |   |   |
| MFLA_1394 | Methyltransferase type 12                                     | 177  | Coenzyme transport and metabolism | pfam03848              |           |   |   |
| MFLA_2501 | lipoic acid synthetase                                        | 325  | Coenzyme transport and metabolism | pfam04055              | TIGR00510 |   |   |
| MFLA_0560 | GTP cyclohydrolase subunit MoaA (IMGterm)                     | 329  | Coenzyme transport and metabolism | pfam04055<br>pfam06463 | TIGR02666 |   |   |
| MFLA_2294 | GTP cyclohydrolase subunit MoaA (IMGterm)                     | 343  | Coenzyme transport and metabolism | pfam04055<br>pfam06463 | TIGR02666 |   |   |
| MFLA_2295 | molybdenum cofactor guanylyltransferase (IMGterm)             | 192  | Coenzyme transport and metabolism |                        | TIGR02665 |   |   |
| MFLA_0705 | ABC transporter related                                       | 232  | Defense mechanisms                | pfam00005              |           |   |   |
| MFLA_1192 | ABC transporter related                                       | 587  | Defense mechanisms                | pfam00005<br>pfam00664 |           | * | * |
| MFLA_1548 | ABC transporter related                                       | 593  | Defense mechanisms                | pfam00005<br>pfam00664 |           | * | * |
| MFLA_1554 | ABC transporter related                                       | 612  | Defense mechanisms                | pfam00005<br>pfam00664 |           |   | * |
| MFLA_1549 | ABC transporter related                                       | 613  | Defense mechanisms                | pfam00005<br>pfam00664 |           |   | * |
| MFLA_1346 | Type I secretion membrane fusion protein, HlyD                | 462  | Defense mechanisms                | pfam00529              | TIGR01843 |   | * |
| MFLA_2546 | Cation/multidrug efflux pump-like protein                     | 186  | Defense mechanisms                | pfam00873              |           |   | * |
| MFLA_1793 | Hydrophobe/amphiphile efflux-1 HAE1                           | 1062 | Defense mechanisms                | pfam00873              | TIGR00915 | * | * |
| MFLA_2556 | RND multidrug efflux transporter MexB                         | 394  | Defense mechanisms                | pfam00873              |           |   | * |
| MFLA_2545 | RND multidrug efflux transporter MexB                         | 440  | Defense mechanisms                | pfam00873              |           |   | * |
| MFLA_2373 |                                                               | 1058 | Defense mechanisms                | pfam00873              |           |   | * |
| MFLA_2239 | ABC-2                                                         | 268  | Defense mechanisms                | pfam01061              |           |   | * |
| MFLA_0166 | ABC-2                                                         | 374  | Defense mechanisms                | pfam01061              |           |   |   |
| MFLA_2707 | N-acetylmuramoyl-L-alanine amidase, family 2                  | 184  | Defense mechanisms                | pfam01510              |           |   |   |
| MFLA_2527 | Undecaprenyl-diphosphatase (EC                                | 269  | Defense mechanisms                | pfam02673              | TIGR00753 |   | * |

| 3.6.1.27) (IMGterm) |                                                                                         |     |                                  |                                                               |           |   |   |
|---------------------|-----------------------------------------------------------------------------------------|-----|----------------------------------|---------------------------------------------------------------|-----------|---|---|
| MFLA_1450           | cytochrome c, class I                                                                   | 169 | Energy production and conversion | pfam00034                                                     |           | * |   |
| MFLA_1432           | cytochrome c, class I                                                                   | 217 | Energy production and conversion | pfam00034                                                     |           |   | * |
| MFLA_2578           | hypothetical protein                                                                    | 130 | Energy production and conversion | pfam00034                                                     |           | * | * |
| MFLA_1449           | cytochrome c oxidase, subunit II                                                        | 346 | Energy production and conversion | pfam00034<br>pfam00116                                        | TIGR02866 | * | * |
| MFLA_0850           | electron transport complex, RnfABCDGE type, B subunit                                   | 216 | Energy production and conversion | pfam00037<br>pfam04060<br>pfam00070                           | TIGR01944 |   |   |
| MFLA_2173           | Rubredoxin-type Fe(Cys) <sub>4</sub> protein                                            | 415 | Energy production and conversion | pfam00301<br>pfam07992                                        |           |   |   |
| MFLA_0319           | assimilatory nitrite reductase (NAD(P)H) large subunit precursor (EC 1.7.1.4) (IMGterm) | 854 | Energy production and conversion | pfam00070<br>pfam01077<br>pfam03460<br>pfam04324<br>pfam07992 | TIGR02374 |   |   |
| MFLA_1222           | thioredoxin-related                                                                     | 112 | Energy production and conversion | pfam00085                                                     |           |   |   |
| MFLA_1225           | ferredoxin                                                                              | 139 | Energy production and conversion | pfam00111                                                     |           |   |   |
| MFLA_0441           | ferredoxin                                                                              | 317 | Energy production and conversion | pfam00111<br>pfam00175<br>pfam00970                           |           |   |   |
| MFLA_1448           | Cytochrome-c oxidase                                                                    | 631 | Energy production and conversion | pfam00115                                                     | TIGR02891 |   | * |
| MFLA_2750           | ATP synthase F <sub>0</sub> subcomplex A subunit (IMGterm)                              | 267 | Energy production and conversion | pfam00119                                                     | TIGR01131 |   | * |
| MFLA_2054           | NADH dehydrogenase subunit H (EC 1.6.5.3) (IMGterm)                                     | 339 | Energy production and conversion | pfam00146                                                     |           |   | * |
| MFLA_1535           | Alkanesulfonate monooxygenase                                                           | 354 | Energy production and conversion | pfam00296                                                     |           |   |   |
| MFLA_1534           | Alkanesulfonate monooxygenase                                                           | 389 | Energy production and conversion | pfam00296                                                     |           |   |   |
| MFLA_1789           | luciferase-like protein                                                                 | 333 | Energy production and conversion | pfam00296                                                     | TIGR03558 |   |   |
| MFLA_1544           | luciferase-like protein                                                                 | 449 | Energy production and conversion | pfam00296                                                     |           |   |   |
| MFLA_2352           | nitrilotriacetate monooxygenase, A subunit, putative                                    | 434 | Energy production and conversion | pfam00296                                                     |           |   |   |
| MFLA_0580           | NADH dehydrogenase (quinone)                                                            | 510 | Energy production and conversion | pfam00361                                                     |           |   | * |
| MFLA_2049           | NADH dehydrogenase subunit M (EC 1.6.5.3) (IMGterm)                                     | 495 | Energy production and conversion | pfam00361                                                     | TIGR01972 |   | * |
| MFLA_2048           | NADH dehydrogenase subunit N (EC 1.6.5.3) (IMGterm)                                     | 482 | Energy production and conversion | pfam00361                                                     | TIGR01770 |   | * |
| MFLA_2050           | NADH dehydrogenase subunit L (EC 1.6.5.3) (IMGterm)                                     | 670 | Energy production and conversion | pfam00361<br>pfam00662                                        | TIGR01974 | * | * |
| MFLA_0209           | sodium:dicarboxylate symporter                                                          | 419 | Energy production and conversion | pfam00375                                                     |           |   |   |
| MFLA_2051           | NADH dehydrogenase subunit K (EC 1.6.5.3) (IMGterm)                                     | 102 | Energy production and conversion | pfam00420                                                     |           |   | * |



|           |                                                                           |     |                                  |                        |                        |   |
|-----------|---------------------------------------------------------------------------|-----|----------------------------------|------------------------|------------------------|---|
| MFLA_2061 | NADH dehydrogenase subunit A (EC 1.6.5.3) (IMGterm)                       | 118 | Energy production and conversion | pfam00507              |                        | * |
| MFLA_1293 | cytochrome bo3 quinol oxidase subunit 3 (EC 1.10.3.-) (IMGterm)           | 205 | Energy production and conversion | pfam00510              | TIGR02842              | * |
| MFLA_1447 | cytochrome c oxidase, subunit III                                         | 203 | Energy production and conversion | pfam00510              |                        | * |
| MFLA_0027 | alkyl hydroperoxide reductase/ Thiol specific antioxidant/ Mal allergen   | 185 | Energy production and conversion | pfam00578              |                        | * |
| MFLA_0741 | acetate kinase (EC 2.7.2.1) (IMGterm)                                     | 395 | Energy production and conversion | pfam00871              | TIGR00016              |   |
| MFLA_1538 | nitroreductase                                                            | 203 | Energy production and conversion | pfam00881              |                        |   |
| MFLA_2303 | cytochrome B561                                                           | 187 | Energy production and conversion | pfam01292              |                        | * |
| MFLA_0669 |                                                                           | 397 | Energy production and conversion | pfam01494              |                        | * |
| MFLA_0943 | cytochrome bd quinol oxidase subunit 1 apoprotein (EC 1.10.3.-) (IMGterm) | 476 | Energy production and conversion | pfam01654              |                        | * |
| MFLA_0942 | cytochrome bd quinol oxidase subunit 2 apoprotein (EC 1.10.3.-) (IMGterm) | 335 | Energy production and conversion | pfam02322              | TIGR00203              | * |
| MFLA_1433 | cytochrome C oxidase, mono-heme subunit/FixO                              | 206 | Energy production and conversion | pfam02433              | TIGR00781              | * |
| MFLA_0719 | formate dehydrogenase family accessory protein FdhD                       | 278 | Energy production and conversion | pfam02634              | TIGR00129              |   |
| MFLA_2104 | Twin-arginine translocation pathway signal                                | 483 | Energy production and conversion | pfam03069              |                        |   |
| MFLA_1292 | cytochrome bo3 quinol oxidase subunit 4 (EC 1.10.3.-) (IMGterm)           | 112 | Energy production and conversion | pfam03626              | TIGR02847              | * |
| MFLA_1991 | protein of unknown function DUF1111                                       | 450 | Energy production and conversion | pfam06537              |                        | * |
| MFLA_1799 | major facilitator superfamily MFS_1                                       | 429 | Energy production and conversion | pfam07690              |                        | * |
| MFLA_1379 | 4Fe-4S cluster binding                                                    | 355 | Energy production and conversion | pfam08331              | TIGR00276              |   |
| MFLA_0901 | 4Fe-4S ferredoxin, iron-sulfur binding                                    | 461 | Energy production and conversion | pfam11614              | TIGR02745              | * |
| MFLA_0738 | 4Fe-4S ferredoxin, iron-sulfur binding                                    | 85  | Energy production and conversion |                        |                        |   |
| MFLA_1421 | phospholipase D/Transphosphatidylase                                      | 730 | Function unknown                 | pfam00614<br>pfam09335 |                        | * |
| MFLA_0243 | ABC-2                                                                     | 259 | Function unknown                 | pfam01061              |                        |   |
| MFLA_1980 | putative flagellar biosynthetic protein                                   | 102 | Function unknown                 | pfam01312              | TIGR00789              |   |
| MFLA_0806 | iron-sulfur cluster assembly protein IscA                                 | 107 | Function unknown                 | pfam01521              | TIGR00049<br>TIGR02011 |   |
| MFLA_1118 | Smr protein/MutS2                                                         | 179 | Function unknown                 | pfam01713              |                        |   |
| MFLA_2759 | protein of unknown function DUF37                                         | 70  | Function unknown                 | pfam01809              | TIGR00278              |   |
| MFLA_0519 | putative integral membrane protein                                        | 235 | Function unknown                 | pfam01891              |                        | * |
| MFLA_0353 | protein of unknown function DUF72                                         | 259 | Function unknown                 | pfam01904              |                        | * |
| MFLA_0623 | ATP:cob(I)alamin adenosyltransferase (IMGterm)                            | 191 | Function unknown                 | pfam01923              | TIGR00636              |   |
| MFLA_1783 | hypothetical protein                                                      | 420 | Function unknown                 | pfam02308              |                        | * |
| MFLA_0175 | MgtC/SapB transporter                                                     | 229 | Function unknown                 | pfam02308              |                        |   |

|           |                                                                  |      |                  |           |           |   |   |
|-----------|------------------------------------------------------------------|------|------------------|-----------|-----------|---|---|
| MFLA_1846 | protein of unknown function DUF165                               | 232  | Function unknown | pfam02592 | TIGR00697 |   | * |
| MFLA_1874 | condensin subunit ScpA (IMGterm)                                 | 266  | Function unknown | pfam02616 |           |   |   |
| MFLA_0952 | protein of unknown function DUF188                               | 150  | Function unknown | pfam02639 |           |   |   |
| MFLA_1871 | protein of unknown function DUF202                               | 120  | Function unknown | pfam02656 |           |   | * |
| MFLA_1363 | protein of unknown function DUF204                               | 189  | Function unknown | pfam02659 |           | * | * |
| MFLA_2327 | acyl-phosphate glycerol-3-phosphate acyltransferase (IMGterm)    | 196  | Function unknown | pfam02660 | TIGR00023 | * | * |
| MFLA_0485 | protein of unknown function UPF0060                              | 108  | Function unknown | pfam02694 |           | * | * |
| MFLA_2554 | protein of unknown function UPF0060                              | 110  | Function unknown | pfam02694 |           | * | * |
| MFLA_2634 | Extradiol ring-cleavage dioxygenase, class III enzyme, subunit B | 258  | Function unknown | pfam02900 |           |   |   |
| MFLA_1808 | Uncharacterized protein UPF0114                                  | 176  | Function unknown | pfam03350 | TIGR00645 |   | * |
| MFLA_0659 | cyclase/dehydrase                                                | 158  | Function unknown | pfam03364 |           |   |   |
| MFLA_1209 | ribonuclease BN                                                  | 312  | Function unknown | pfam03631 | TIGR00765 |   | * |
| MFLA_0474 | conserved hypothetical protein 701                               | 137  | Function unknown | pfam03653 | TIGR00701 |   | * |
| MFLA_1143 | protein of unknown function UPF0125                              | 110  | Function unknown | pfam03658 |           |   |   |
| MFLA_2539 | Outer membrane autotransporter barrel                            | 1778 | Function unknown | pfam03797 | TIGR01414 | * |   |
| MFLA_2228 | protein of unknown function DUF329                               | 62   | Function unknown | pfam03884 |           |   |   |
| MFLA_0192 | membrane protein of unknown function                             | 115  | Function unknown | pfam04020 |           | * |   |
| MFLA_1471 | membrane protein of unknown function                             | 137  | Function unknown | pfam04020 |           |   | * |
| MFLA_0674 | hypothetical protein                                             | 143  | Function unknown | pfam04239 |           |   |   |
| MFLA_1115 | protein of unknown function DUF454                               | 129  | Function unknown | pfam04304 |           | * | * |
| MFLA_2192 | hypothetical protein                                             | 117  | Function unknown | pfam04314 |           |   |   |
| MFLA_0047 | protein of unknown function DUF475                               | 348  | Function unknown | pfam04332 |           | * |   |
| MFLA_0657 | protein of unknown function DUF482                               | 373  | Function unknown | pfam04339 |           |   |   |
| MFLA_2499 | protein of unknown function DUF493                               | 97   | Function unknown | pfam04359 |           |   |   |
| MFLA_0190 | protein of unknown function DUF494                               | 150  | Function unknown | pfam04361 |           |   |   |
| MFLA_2385 | protein of unknown function DUF502                               | 200  | Function unknown | pfam04367 |           |   | * |
| MFLA_0902 | protein of unknown function DUF498                               | 141  | Function unknown | pfam04430 |           |   |   |
| MFLA_2583 | Fusaric acid resistance protein conserved region                 | 727  | Function unknown | pfam04632 |           |   | * |
| MFLA_0896 | Rhs element Vgr protein                                          | 545  | Function unknown | pfam04717 | TIGR01646 |   |   |
| MFLA_1375 | hypothetical protein                                             | 272  | Function unknown | pfam05954 |           |   |   |
| MFLA_0403 | transmembrane pair                                               | 151  | Function unknown | pfam04794 |           |   |   |
| MFLA_2651 | Csbd-like protein                                                | 68   | Function unknown | pfam05232 |           | * | * |
| MFLA_2241 | protein of unknown function DUF1232                              | 89   | Function unknown | pfam05532 |           |   |   |
| MFLA_0180 | protein of unknown function DUF1275                              | 236  | Function unknown | pfam06803 |           |   | * |
| MFLA_2428 | hypothetical protein                                             | 302  | Function unknown | pfam06912 |           |   |   |
| MFLA_0160 | YaeQ                                                             | 193  | Function unknown | pfam06977 | TIGR02595 | * |   |
|           |                                                                  |      |                  | pfam07589 |           |   |   |
|           |                                                                  |      |                  | pfam07152 |           |   |   |

|           |                                                                   |      |                                  |                        |                        |   |
|-----------|-------------------------------------------------------------------|------|----------------------------------|------------------------|------------------------|---|
| MFLA_0940 | hypothetical protein                                              | 184  | Function unknown                 | pfam07446              | *                      | * |
| MFLA_2205 | DoxX                                                              | 124  | Function unknown                 | pfam07681              |                        | * |
| MFLA_2633 | DoxX                                                              | 128  | Function unknown                 | pfam07681              |                        | * |
| MFLA_2430 | DoxX                                                              | 134  | Function unknown                 | pfam07681              |                        | * |
| MFLA_1610 | Cupin 2, conserved barrel                                         | 143  | Function unknown                 | pfam07883              | *                      |   |
| MFLA_2631 | Entericidin EcnAB                                                 | 44   | Function unknown                 | pfam08085              | *                      |   |
| MFLA_2729 | hypothetical protein                                              | 115  | Function unknown                 | pfam08765              |                        |   |
| MFLA_1749 | hypothetical protein                                              | 212  | Function unknown                 | pfam09335              |                        | * |
| MFLA_1445 | hypothetical protein                                              | 300  | Function unknown                 | pfam09678              | *                      | * |
| MFLA_2689 | hypothetical protein                                              | 1056 | Function unknown                 | pfam09718              | TIGR01541<br>TIGR02675 |   |
| MFLA_1585 | hypothetical protein                                              | 61   | Function unknown                 | pfam09838              |                        | * |
| MFLA_2475 | hypothetical protein                                              | 143  | Function unknown                 | pfam09900              | *                      | * |
| MFLA_0116 | hypothetical protein                                              | 103  | Function unknown                 | pfam09919              |                        |   |
| MFLA_2659 | hypothetical protein                                              | 79   | Function unknown                 | pfam09939              |                        |   |
| MFLA_1428 | hypothetical protein                                              | 170  | Function unknown                 | pfam09990              |                        | * |
| MFLA_1437 | integral membrane protein                                         | 154  | Function unknown                 | pfam10027              | *                      | * |
| MFLA_0621 | hypothetical protein                                              | 66   | Function unknown                 | pfam10055              |                        |   |
| MFLA_0619 | hypothetical protein                                              | 119  | Function unknown                 | pfam10087              |                        |   |
| MFLA_1754 | hypothetical protein                                              | 366  | Function unknown                 | pfam10093              |                        |   |
| MFLA_0852 | hypothetical protein                                              | 366  | Function unknown                 | pfam10442              |                        |   |
| MFLA_0703 | hypothetical protein                                              | 204  | Function unknown                 | pfam11736              | *                      |   |
| MFLA_0673 | hypothetical protein                                              | 184  | Function unknown                 |                        | *                      |   |
| MFLA_2482 | hypothetical protein                                              | 221  | Function unknown                 |                        | *                      | * |
| MFLA_1284 | hypothetical protein                                              | 637  | Function unknown                 |                        | *                      |   |
| MFLA_0110 | hypothetical protein                                              | 70   | Function unknown                 |                        |                        |   |
| MFLA_0712 | hypothetical protein                                              | 70   | Function unknown                 |                        |                        |   |
| MFLA_0149 | hypothetical protein                                              | 113  | Function unknown                 |                        |                        |   |
| MFLA_1163 | hypothetical protein                                              | 203  | Function unknown                 |                        |                        | * |
| MFLA_2685 | Phage-related protein tail component-like protein                 | 1171 | Function unknown                 |                        |                        | * |
| MFLA_0096 | Prolyl 4-hydroxylase, alpha subunit                               | 176  | Function unknown                 |                        |                        |   |
| MFLA_0201 | transmembrane protein, twin-arginine translocation pathway signal | 150  | Function unknown                 |                        | *                      |   |
| MFLA_1348 | Type I secretion system ATPase, PrtD                              | 556  | General function prediction only | pfam00005              | TIGR01842              | * |
| MFLA_1347 | Type I secretion system ATPase, PrtD                              | 568  | General function prediction only | pfam00005              | TIGR01842              | * |
| MFLA_2391 | ABC transporter related                                           | 470  | General function prediction only | pfam00005<br>pfam08352 |                        |   |
| MFLA_1540 | ABC transporter related                                           | 533  | General function prediction only | pfam00005<br>pfam08352 | TIGR02323              |   |
| MFLA_0562 | 4Fe-4S ferredoxin, iron-sulfur binding                            | 101  | General function prediction only | pfam00037<br>pfam11953 |                        |   |

|           |                                                                               |     |                                  |                        |                        |   |   |
|-----------|-------------------------------------------------------------------------------|-----|----------------------------------|------------------------|------------------------|---|---|
| MFLA_2135 | conserved hypothetical protein, predicted peptidase aspartic family           | 213 | General function prediction only | pfam00077              | TIGR02281              | * |   |
| MFLA_0589 | short-chain dehydrogenase/reductase SDR                                       | 285 | General function prediction only | pfam00106              |                        | * |   |
| MFLA_0588 | short-chain dehydrogenase/reductase SDR                                       | 247 | General function prediction only | pfam00106              |                        |   |   |
| MFLA_2676 | short-chain dehydrogenase/reductase SDR                                       | 264 | General function prediction only | pfam00106              |                        |   |   |
| MFLA_1732 | Alcohol dehydrogenase, zinc-binding                                           | 269 | General function prediction only | pfam00107              |                        |   |   |
| MFLA_0900 | metallophosphoesterase                                                        | 536 | General function prediction only | pfam00149<br>pfam07589 | TIGR02595              | * | * |
| MFLA_2181 | hypothetical protein                                                          | 227 | General function prediction only | pfam00156              | TIGR00201              | * |   |
| MFLA_0318 | assimilatory nitrite reductase (NAD(P)H) small subunit (EC 1.7.1.4) (IMGterm) | 130 | General function prediction only | pfam00355              | TIGR02378              |   |   |
| MFLA_1542 | binding-protein-dependent transport systems inner membrane component          | 352 | General function prediction only | pfam00528              |                        |   | * |
| MFLA_1541 | binding-protein-dependent transport systems inner membrane component          | 376 | General function prediction only | pfam00528              |                        |   | * |
| MFLA_1490 | putative signal transduction protein with CBS domains                         | 150 | General function prediction only | pfam00571              |                        |   |   |
| MFLA_0436 | Acetyltransferase, GNAT family (IMGterm)                                      | 153 | General function prediction only | pfam00583              |                        |   |   |
| MFLA_1536 | Haloacid dehalogenase-like hydrolase                                          | 223 | General function prediction only | pfam00702              |                        |   |   |
| MFLA_2128 | beta-lactamase-like protein                                                   | 254 | General function prediction only | pfam00753              |                        |   |   |
| MFLA_0841 | beta-lactamase-like protein                                                   | 257 | General function prediction only | pfam00753              |                        |   |   |
| MFLA_2168 | beta-lactamase-like protein                                                   | 284 | General function prediction only | pfam00753              |                        |   |   |
| MFLA_1496 | putative hydrolase protein                                                    | 100 | General function prediction only | pfam00753              |                        |   |   |
| MFLA_2093 | DNA internalization-related competence protein ComEC/Rec2                     | 802 | General function prediction only | pfam00753<br>pfam03772 | TIGR00360<br>TIGR00361 |   | * |
| MFLA_0469 | ornithine-acyl[acyl carrier protein] N-acyltransferase (IMGterm)              | 249 | General function prediction only | pfam00765              |                        |   |   |
| MFLA_0463 | Nitrilase/cyanide hydratase and apolipoprotein N-acyltransferase              | 339 | General function prediction only | pfam00795              |                        |   |   |
| MFLA_1133 | protein of unknown function DUF6, transmembrane                               | 294 | General function prediction only | pfam00892              | TIGR00688              | * | * |
| MFLA_2478 | protein of unknown function DUF6, transmembrane                               | 304 | General function prediction only | pfam00892              |                        | * | * |
| MFLA_2356 | protein of unknown function DUF6, transmembrane                               | 305 | General function prediction only | pfam00892              |                        | * | * |
| MFLA_1712 | protein of unknown function DUF6, transmembrane                               | 277 | General function prediction only | pfam00892              |                        |   | * |
| MFLA_2576 | protein of unknown function DUF6,                                             | 329 | General function prediction only | pfam00892              |                        |   | * |

|           |                                                                |     |                                  |                        |                        |   |   |
|-----------|----------------------------------------------------------------|-----|----------------------------------|------------------------|------------------------|---|---|
|           | transmembrane                                                  |     |                                  |                        |                        |   |   |
| MFLA_0821 | glycoside hydrolase, family 24                                 | 225 | General function prediction only | pfam00959              |                        |   | * |
| MFLA_1843 | protein of unknown function UPF0005                            | 201 | General function prediction only | pfam01027              |                        |   | * |
| MFLA_2504 | pyridoxamine 5'-phosphate oxidase-related, FMN-binding         | 218 | General function prediction only | pfam01243              |                        |   |   |
| MFLA_0521 | cytochrome c assembly protein                                  | 269 | General function prediction only | pfam01578              |                        |   | * |
| MFLA_0959 | Secretion chaperone CsaA                                       | 112 | General function prediction only | pfam01588              | TIGR02222              |   |   |
| MFLA_0590 | hypothetical protein                                           | 185 | General function prediction only | pfam01613              |                        |   |   |
| MFLA_1287 | aminoglycoside phosphotransferase                              | 330 | General function prediction only | pfam01636              |                        |   |   |
| MFLA_1842 | Rhomboid-like protein                                          | 356 | General function prediction only | pfam01694              |                        |   | * |
| MFLA_1174 | protein of unknown function DUF45                              | 120 | General function prediction only | pfam01863              |                        |   |   |
| MFLA_0641 | protein of unknown function DUF45                              | 236 | General function prediction only | pfam01863              |                        |   |   |
| MFLA_1838 | protein of unknown function DUF58                              | 317 | General function prediction only | pfam01882              |                        |   | * |
| MFLA_2452 | DNA polymerase, beta-like region                               | 96  | General function prediction only | pfam01909              |                        |   |   |
| MFLA_1809 | protein of unknown function DUF81                              | 264 | General function prediction only | pfam01925              |                        | * | * |
| MFLA_2167 | protein of unknown function DUF81                              | 268 | General function prediction only | pfam01925              |                        | * | * |
| MFLA_1552 | protein of unknown function DUF81                              | 344 | General function prediction only | pfam01925              |                        | * | * |
| MFLA_2237 | protein of unknown function DUF81                              | 263 | General function prediction only | pfam01925              |                        |   | * |
| MFLA_1670 | protein of unknown function DUF81                              | 289 | General function prediction only | pfam01925              |                        |   | * |
| MFLA_1274 | polysaccharide export protein                                  | 399 | General function prediction only | pfam01943              |                        |   | * |
| MFLA_0649 | protein of unknown function UPF0054                            | 149 | General function prediction only | pfam02130              | TIGR00043              |   |   |
| MFLA_1875 | peptidase M50                                                  | 213 | General function prediction only | pfam02163              |                        |   | * |
| MFLA_0231 | tRNA (guanine-N(7)-)-methyltransferase (EC 2.1.1.33) (IMGterm) | 238 | General function prediction only | pfam02390              | TIGR00091              |   |   |
| MFLA_1231 | cobalamin synthesis protein, P47K                              | 406 | General function prediction only | pfam02492<br>pfam07683 |                        |   |   |
| MFLA_2362 | NAD(P)H dehydrogenase (quinone)                                | 205 | General function prediction only | pfam02525              |                        | * |   |
| MFLA_0569 | regulatory protein RecX                                        | 155 | General function prediction only | pfam02631              |                        |   |   |
| MFLA_1693 | Colicin V production protein                                   | 163 | General function prediction only | pfam02674              |                        |   | * |
| MFLA_2210 | integral membrane protein MviN                                 | 513 | General function prediction only | pfam03023              | TIGR01695              | * | * |
| MFLA_2343 | 4-hydroxybenzoyl-CoA thioesterase                              | 136 | General function prediction only | pfam03061              | TIGR00051<br>TIGR02799 |   |   |
| MFLA_2701 | Mu-like prophage FluMu protein gp28-like                       | 595 | General function prediction only | pfam03237              |                        |   |   |
| MFLA_1823 | flavodoxin/nitric oxide synthase                               | 199 | General function prediction only | pfam03358              | TIGR01755              |   |   |
| MFLA_1422 | Endonuclease/exonuclease/phosphatase                           | 235 | General function prediction only | pfam03372              |                        |   |   |
| MFLA_0220 | permease YjgP/YjgQ                                             | 356 | General function prediction only | pfam03739              |                        |   |   |
| MFLA_1731 | Antibiotic biosynthesis monooxygenase                          | 122 | General function prediction only | pfam03992              |                        |   |   |
| MFLA_1810 | protein of unknown function DUF395, YeeE/YedE                  | 141 | General function prediction only | pfam04143              |                        | * | * |
| MFLA_1811 | protein of unknown function DUF395, YeeE/YedE                  | 140 | General function prediction only | pfam04143              |                        |   | * |

|           |                                                                |      |                                        |                                                                            |  |           |           |
|-----------|----------------------------------------------------------------|------|----------------------------------------|----------------------------------------------------------------------------|--|-----------|-----------|
| MFLA_0030 | FxsA cytoplasmic membrane protein                              | 142  | General function prediction only       | pfam04186                                                                  |  |           |           |
| MFLA_1429 | copper resistance protein CopC                                 | 120  | General function prediction only       | pfam04234                                                                  |  | *         | *         |
| MFLA_0010 | transport-associated                                           | 101  | General function prediction only       | pfam04972                                                                  |  | *         |           |
| MFLA_1796 | transport-associated                                           | 108  | General function prediction only       | pfam04972                                                                  |  | *         |           |
| MFLA_0950 | transport-associated                                           | 171  | General function prediction only       | pfam04972                                                                  |  | *         | *         |
| MFLA_0897 | hypothetical protein                                           | 499  | General function prediction only       | pfam04984                                                                  |  |           |           |
| MFLA_0165 | 23S rRNA m(6)A-1618 methyltransferase (EC 2.1.1.48) (IMGterm)  | 336  | General function prediction only       | pfam05971                                                                  |  |           |           |
| MFLA_2233 | protein of unknown function DUF1289                            | 61   | General function prediction only       | pfam06945                                                                  |  |           |           |
| MFLA_1895 | ATPase associated with various cellular activities, AAA_3      | 338  | General function prediction only       | pfam07726                                                                  |  |           |           |
| MFLA_0097 | Sell                                                           | 254  | General function prediction only       | pfam08238                                                                  |  |           |           |
| MFLA_2258 | hypothetical protein                                           | 329  | General function prediction only       |                                                                            |  | *         | *         |
| MFLA_2429 | hypothetical protein                                           | 99   | General function prediction only       |                                                                            |  |           |           |
| MFLA_1896 | hypothetical protein                                           | 286  | General function prediction only       |                                                                            |  |           |           |
| MFLA_0688 | hypothetical protein                                           | 287  | General function prediction only       |                                                                            |  |           |           |
| MFLA_2479 | putative carbonic anhydrase, family 3                          | 180  | General function prediction only       |                                                                            |  |           |           |
| MFLA_1487 | putative hydrolase protein                                     | 150  | General function prediction only       |                                                                            |  |           |           |
| MFLA_2256 | Pyrimidine 5-nucleotidase                                      | 241  | General function prediction only       |                                                                            |  | TIGR01509 | TIGR01993 |
| MFLA_1759 | Radical SAM                                                    | 411  | General function prediction only       |                                                                            |  |           |           |
| MFLA_0241 | STAS domain                                                    | 85   | General function prediction only       |                                                                            |  |           |           |
| MFLA_2560 | ABC transporter related                                        | 271  | Inorganic ion transport and metabolism | pfam00005                                                                  |  |           |           |
| MFLA_1561 | ABC transporter related                                        | 291  | Inorganic ion transport and metabolism | pfam00005                                                                  |  |           |           |
| MFLA_1857 | ABC transporter related                                        | 304  | Inorganic ion transport and metabolism | pfam00005                                                                  |  |           |           |
| MFLA_0325 | nitrate transport ATP-binding subunits C and D                 | 268  | Inorganic ion transport and metabolism | pfam00005                                                                  |  | TIGR01184 |           |
| MFLA_0317 | sulfite reductase (NADPH) alpha subunit (EC 1.8.1.2) (IMGterm) | 1383 | Inorganic ion transport and metabolism | pfam00175<br>pfam00258<br>pfam00384<br>pfam00667<br>pfam01568<br>pfam04879 |  | TIGR01931 |           |
| MFLA_2377 | Catalase                                                       | 712  | Inorganic ion transport and metabolism | pfam00199<br>pfam06628                                                     |  |           |           |
| MFLA_1206 | Alkaline phosphatase                                           | 505  | Inorganic ion transport and metabolism | pfam00245                                                                  |  | *         |           |
| MFLA_0451 | Alkaline phosphatase                                           | 497  | Inorganic ion transport and metabolism | pfam00245<br>pfam07589                                                     |  | TIGR02595 | * *       |
| MFLA_0582 | NADH dehydrogenase (quinone)                                   | 966  | Inorganic ion transport and metabolism | pfam00361<br>pfam00662<br>pfam04039                                        |  | TIGR00943 | *         |
| MFLA_0581 | NADH-ubiquinone oxidoreductase, chain                          | 106  | Inorganic ion transport and metabolism | pfam00420                                                                  |  |           | *         |

| 4L        |                                                                                    |      |                                        |                                     |                        |   |   |
|-----------|------------------------------------------------------------------------------------|------|----------------------------------------|-------------------------------------|------------------------|---|---|
| MFLA_1847 | binding-protein-dependent transport systems inner membrane component               | 264  | Inorganic ion transport and metabolism | pfam00528                           |                        | * | * |
| MFLA_1858 | binding-protein-dependent transport systems inner membrane component               | 321  | Inorganic ion transport and metabolism | pfam00528                           |                        | * | * |
| MFLA_2389 | binding-protein-dependent transport systems inner membrane component               | 323  | Inorganic ion transport and metabolism | pfam00528                           |                        | * | * |
| MFLA_1556 | binding-protein-dependent transport systems inner membrane component               | 260  | Inorganic ion transport and metabolism | pfam00528                           |                        |   | * |
| MFLA_2390 | binding-protein-dependent transport systems inner membrane component               | 266  | Inorganic ion transport and metabolism | pfam00528                           |                        |   | * |
| MFLA_1557 | binding-protein-dependent transport systems inner membrane component               | 272  | Inorganic ion transport and metabolism | pfam00528                           |                        |   | * |
| MFLA_2559 | binding-protein-dependent transport systems inner membrane component               | 283  | Inorganic ion transport and metabolism | pfam00528                           |                        |   | * |
| MFLA_1848 | binding-protein-dependent transport systems inner membrane component               | 303  | Inorganic ion transport and metabolism | pfam00528                           |                        |   | * |
| MFLA_1392 | Molybdate ABC transporter, permease protein                                        | 226  | Inorganic ion transport and metabolism | pfam00528                           | TIGR02141              |   | * |
| MFLA_2171 | nitrate transport permease                                                         | 272  | Inorganic ion transport and metabolism | pfam00528                           | TIGR01183              | * | * |
| MFLA_0326 | nitrate transport permease                                                         | 295  | Inorganic ion transport and metabolism | pfam00528                           | TIGR01183              |   | * |
| MFLA_0794 | phosphate ABC transporter membrane protein 1, PhoT family (TC 3.A.1.7.1) (IMGterm) | 320  | Inorganic ion transport and metabolism | pfam00528                           | TIGR00974<br>TIGR02138 |   | * |
| MFLA_0610 | Sulfate ABC transporter, permease protein CysW                                     | 298  | Inorganic ion transport and metabolism | pfam00528                           | TIGR00969<br>TIGR02140 | * | * |
| MFLA_0793 | phosphate ABC transporter membrane protein 2, PhoT family (TC 3.A.1.7.1) (IMGterm) | 312  | Inorganic ion transport and metabolism | pfam00528<br>pfam11812              | TIGR00974              |   | * |
| MFLA_0094 | Rhodanese-like protein                                                             | 110  | Inorganic ion transport and metabolism | pfam00581                           |                        |   |   |
| MFLA_0833 | TonB-dependent receptor                                                            | 411  | Inorganic ion transport and metabolism | pfam00593                           |                        |   |   |
| MFLA_2679 | TonB-dependent receptor                                                            | 1054 | Inorganic ion transport and metabolism | pfam00593<br>pfam07660<br>pfam07715 |                        | * | * |
| MFLA_1351 | TonB-dependent receptor                                                            | 1188 | Inorganic ion transport and metabolism | pfam00593<br>pfam07660<br>pfam07715 |                        | * |   |
| MFLA_1989 | TonB-dependent receptor                                                            | 675  | Inorganic ion transport and metabolism | pfam00593<br>pfam07715              |                        | * |   |
| MFLA_2351 | TonB-dependent receptor                                                            | 761  | Inorganic ion transport and metabolism | pfam00593<br>pfam07715              |                        | * | * |
| MFLA_1599 | TonB-dependent receptor, plug                                                      | 800  | Inorganic ion transport and metabolism | pfam00593                           | TIGR01785              | * |   |

|           |                                                    |      |                                        |           |           |   |  |   |
|-----------|----------------------------------------------------|------|----------------------------------------|-----------|-----------|---|--|---|
|           |                                                    |      |                                        |           | pfam07715 |   |  |   |
| MFLA_0095 | TonB-dependent siderophore receptor                | 823  | Inorganic ion transport and metabolism | pfam00593 | TIGR01783 |   |  |   |
|           |                                                    |      |                                        | pfam07715 |           |   |  |   |
| MFLA_1632 | acriflavin resistance protein                      | 1046 | Inorganic ion transport and metabolism | pfam00873 | TIGR00914 | * |  | * |
| MFLA_1634 | small multidrug resistance protein                 | 105  | Inorganic ion transport and metabolism | pfam00893 |           |   |  | * |
| MFLA_0883 | small multidrug resistance protein                 | 110  | Inorganic ion transport and metabolism | pfam00893 |           |   |  | * |
| MFLA_0434 | ammonium transporter (IMGterm)                     | 434  | Inorganic ion transport and metabolism | pfam00909 | TIGR00836 | * |  | * |
| MFLA_1757 | ammonium transporter (IMGterm)                     | 437  | Inorganic ion transport and metabolism | pfam00909 | TIGR00836 | * |  | * |
| MFLA_2514 | ammonium transporter (IMGterm)                     | 461  | Inorganic ion transport and metabolism | pfam00909 | TIGR00836 | * |  | * |
|           |                                                    |      |                                        | pfam00916 |           |   |  |   |
| MFLA_0005 | sulphate transporter                               | 511  | Inorganic ion transport and metabolism | pfam01740 |           |   |  |   |
| MFLA_1130 | sodium/hydrogen exchanger                          | 586  | Inorganic ion transport and metabolism | pfam00999 |           |   |  | * |
|           |                                                    |      |                                        | pfam00999 |           |   |  |   |
| MFLA_2361 | Potassium efflux system protein                    | 618  | Inorganic ion transport and metabolism | pfam02254 | TIGR00932 |   |  | * |
|           |                                                    |      |                                        | pfam01032 |           | * |  | * |
| MFLA_1606 | transport system permease protein                  | 368  | Inorganic ion transport and metabolism | pfam01032 |           |   |  | * |
| MFLA_0331 | formate/nitrite transporter                        | 270  | Inorganic ion transport and metabolism | pfam01226 | TIGR00790 |   |  | * |
|           |                                                    |      |                                        | pfam01545 |           |   |  |   |
| MFLA_1806 | cation diffusion facilitator family transporter    | 325  | Inorganic ion transport and metabolism | pfam01545 | TIGR01297 |   |  | * |
|           |                                                    |      |                                        | pfam01545 |           |   |  | * |
| MFLA_0409 | cation efflux protein                              | 204  | Inorganic ion transport and metabolism | pfam01545 |           |   |  | * |
| MFLA_0694 | Co/Zn/Cd efflux system component                   | 297  | Inorganic ion transport and metabolism | pfam01545 |           |   |  | * |
| MFLA_1489 | Arsenical pump membrane protein                    | 428  | Inorganic ion transport and metabolism | pfam02040 | TIGR00935 |   |  | * |
| MFLA_2441 | Chromate transporter                               | 404  | Inorganic ion transport and metabolism | pfam02417 | TIGR00937 |   |  | * |
| MFLA_0707 | zinc/iron permease                                 | 251  | Inorganic ion transport and metabolism | pfam02535 |           | * |  | * |
| MFLA_1597 | zinc/iron permease                                 | 258  | Inorganic ion transport and metabolism | pfam02535 |           | * |  | * |
| MFLA_0387 | zinc/iron permease                                 | 300  | Inorganic ion transport and metabolism | pfam02535 |           |   |  | * |
| MFLA_1721 | Na <sup>+</sup> /Pi-cotransporter                  | 539  | Inorganic ion transport and metabolism | pfam02690 | TIGR00704 |   |  | * |
| MFLA_0029 | CutA1 divalent ion tolerance protein               | 115  | Inorganic ion transport and metabolism | pfam03091 |           |   |  |   |
| MFLA_0577 | Na <sup>+</sup> /H <sup>+</sup> antiporter subunit | 122  | Inorganic ion transport and metabolism | pfam03334 | TIGR01300 |   |  | * |
|           |                                                    |      |                                        | pfam03597 |           |   |  |   |
| MFLA_0701 | cytochrome oxidase maturation protein, cbb3-type   | 68   | Inorganic ion transport and metabolism | pfam03597 | TIGR00847 | * |  | * |
|           |                                                    |      |                                        | pfam03741 |           |   |  | * |
| MFLA_2105 | Integral membrane protein TerC                     | 250  | Inorganic ion transport and metabolism | pfam03741 |           |   |  | * |
|           |                                                    |      |                                        | pfam03831 |           |   |  |   |
| MFLA_0958 | alkylphosphonate utilization operon protein PhnA   | 112  | Inorganic ion transport and metabolism | pfam08274 | TIGR00686 |   |  |   |
|           |                                                    |      |                                        | pfam04066 |           |   |  | * |
| MFLA_0578 | multiple resistance and pH regulation protein F    | 89   | Inorganic ion transport and metabolism | pfam04066 |           |   |  | * |
|           |                                                    |      |                                        | pfam04324 |           |   |  |   |
| MFLA_0638 | BFD-like (2Fe-2S)-binding region                   | 77   | Inorganic ion transport and metabolism | pfam04324 |           |   |  |   |
| MFLA_2680 | putative FecR                                      | 320  | Inorganic ion transport and metabolism | pfam04773 |           |   |  |   |
| MFLA_1352 | putative FecR                                      | 348  | Inorganic ion transport and metabolism | pfam04773 |           |   |  | * |
| MFLA_1436 | Catalase                                           | 293  | Inorganic ion transport and metabolism | pfam05067 |           |   |  |   |
|           |                                                    |      |                                        | pfam07396 |           | * |  |   |
| MFLA_0801 | phosphate-selective porin O and P                  | 473  | Inorganic ion transport and metabolism | pfam07396 |           |   |  |   |
| MFLA_1289 | major facilitator superfamily MFS_1                | 402  | Inorganic ion transport and metabolism | pfam07690 | TIGR00896 |   |  | * |
| MFLA_0321 | Nitrate transporter                                | 403  | Inorganic ion transport and metabolism | pfam07690 | TIGR00886 |   |  | * |



|           |                                                                                              |     |                                                               |                        |           |   |   |
|-----------|----------------------------------------------------------------------------------------------|-----|---------------------------------------------------------------|------------------------|-----------|---|---|
| MFLA_0891 | Twin-arginine translocation pathway signal                                                   | 395 | Inorganic ion transport and metabolism                        | pfam07690              |           |   | * |
| MFLA_2031 | TonB-dependent receptor, plug                                                                | 317 | Inorganic ion transport and metabolism                        | pfam07715              |           | * |   |
| MFLA_0708 | TonB-dependent receptor, plug                                                                | 744 | Inorganic ion transport and metabolism                        | pfam07715              |           |   |   |
| MFLA_1859 | ABC transport system substrate-binding protein                                               | 330 | Inorganic ion transport and metabolism                        | pfam09084              |           | * |   |
| MFLA_2561 | NLPA lipoprotein                                                                             | 339 | Inorganic ion transport and metabolism                        | pfam09084              |           | * | * |
| MFLA_1563 | sulfonate ABC transporter, periplasmic sulfonate-binding protein SsuA                        | 348 | Inorganic ion transport and metabolism                        | pfam09084              |           | * |   |
| MFLA_1564 | sulfonate ABC transporter, periplasmic sulfonate-binding protein SsuA                        | 364 | Inorganic ion transport and metabolism                        | pfam09084              |           | * |   |
| MFLA_1550 | thermophilic desulfurizing enzyme, TdsB protein                                              | 347 | Inorganic ion transport and metabolism                        | pfam09084              |           |   |   |
| MFLA_1565 | monooxygenase, putative                                                                      | 352 | Inorganic ion transport and metabolism                        |                        |           |   |   |
| MFLA_0327 | nitrate transporter periplasmic component                                                    | 433 | Inorganic ion transport and metabolism                        |                        |           |   |   |
| MFLA_1546 | thermophilic desulfurizing enzyme, TdsB protein                                              | 355 | Inorganic ion transport and metabolism                        |                        |           |   |   |
| MFLA_1457 | type II and III secretion system protein                                                     | 395 | Intracellular trafficking, secretion, and vesicular transport | pfam00263              |           |   |   |
| MFLA_1341 | type II secretion system protein E                                                           | 570 | Intracellular trafficking, secretion, and vesicular transport | pfam00437<br>pfam05157 |           |   |   |
| MFLA_0266 | protein translocase subunit secE/sec61 gamma (IMGterm)                                       | 115 | Intracellular trafficking, secretion, and vesicular transport | pfam00584              | TIGR00964 | * | * |
| MFLA_0544 | Sec-independent protein translocase TatC (IMGterm)                                           | 246 | Intracellular trafficking, secretion, and vesicular transport | pfam00902              | TIGR00945 | * | * |
| MFLA_0260 | Sec-independent protein translocase TatC (IMGterm)                                           | 244 | Intracellular trafficking, secretion, and vesicular transport | pfam00902              | TIGR00945 |   | * |
| MFLA_2406 | hemolysin activation/secretion protein                                                       | 547 | Intracellular trafficking, secretion, and vesicular transport | pfam01103<br>pfam08479 |           | * |   |
| MFLA_2225 | type 4 prepilin peptidase 1 (EC:3.4.23.43). Aspartic peptidase. MEROPS family A24A (IMGterm) | 288 | Intracellular trafficking, secretion, and vesicular transport | pfam01478<br>pfam06750 |           |   | * |
| MFLA_0117 | outer membrane transport energization protein ExbB (TC 2.C.1.1.1) (IMGterm)                  | 145 | Intracellular trafficking, secretion, and vesicular transport | pfam01618              |           |   |   |
| MFLA_1559 | outer membrane transport energization protein ExbB (TC 2.C.1.1.1) (IMGterm)                  | 244 | Intracellular trafficking, secretion, and vesicular transport | pfam01618              |           |   | * |
| MFLA_2404 | outer membrane transport energization protein ExbB (TC 2.C.1.1.1) (IMGterm)                  | 555 | Intracellular trafficking, secretion, and vesicular transport | pfam01618<br>pfam10102 |           | * | * |
| MFLA_0450 | multiple antibiotic resistance (MarC)-related proteins                                       | 219 | Intracellular trafficking, secretion, and vesicular transport | pfam01914              | TIGR00427 |   | * |
| MFLA_2568 | outer membrane efflux protein                                                                | 438 | Intracellular trafficking, secretion, and vesicular transport | pfam02321              |           | * |   |

|           |                                                                                           |      |                                                               |                        |                        |   |   |
|-----------|-------------------------------------------------------------------------------------------|------|---------------------------------------------------------------|------------------------|------------------------|---|---|
| MFLA_1794 | RND efflux system, outer membrane lipoprotein, NodT                                       | 486  | Intracellular trafficking, secretion, and vesicular transport | pfam02321              | TIGR01845              | * |   |
| MFLA_0542 | twin-arginine translocation protein, TatA/E family                                        | 54   | Intracellular trafficking, secretion, and vesicular transport | pfam02416              | TIGR01411              |   | * |
| MFLA_2402 | outer membrane transport energization protein ExbD (TC 2.C.1.1.1) (IMGterm)               | 134  | Intracellular trafficking, secretion, and vesicular transport | pfam02472              |                        |   | * |
| MFLA_1558 | outer membrane transport energization protein ExbD (TC 2.C.1.1.1) (IMGterm)               | 135  | Intracellular trafficking, secretion, and vesicular transport | pfam02472              |                        |   | * |
| MFLA_2403 | outer membrane transport energization protein ExbD (TC 2.C.1.1.1) (IMGterm)               | 135  | Intracellular trafficking, secretion, and vesicular transport | pfam02472              |                        |   | * |
| MFLA_2063 | protein translocase subunit secG (IMGterm)                                                | 111  | Intracellular trafficking, secretion, and vesicular transport | pfam03840              | TIGR00810              |   | * |
| MFLA_0484 | Hemolysin activator HlyB                                                                  | 572  | Intracellular trafficking, secretion, and vesicular transport | pfam03865<br>pfam08479 |                        | * |   |
| MFLA_0483 | Adhesin HecA 20-residue repeat x2                                                         | 1998 | Intracellular trafficking, secretion, and vesicular transport | pfam05594<br>pfam05860 | TIGR01731<br>TIGR01901 |   | * |
| MFLA_1498 | type IV pilus assembly PilZ                                                               | 123  | Intracellular trafficking, secretion, and vesicular transport | pfam07238              |                        |   |   |
| MFLA_1335 | methylation                                                                               | 161  | Intracellular trafficking, secretion, and vesicular transport | pfam07963              | TIGR02532              | * | * |
| MFLA_2717 | conserved hypothetical phage-related protein                                              | 421  | Intracellular trafficking, secretion, and vesicular transport |                        |                        |   |   |
| MFLA_2520 | hypothetical protein                                                                      | 327  | Intracellular trafficking, secretion, and vesicular transport |                        |                        | * |   |
| MFLA_2521 | hypothetical protein                                                                      | 147  | Intracellular trafficking, secretion, and vesicular transport |                        | TIGR02523              |   | * |
| MFLA_1426 | short-chain dehydrogenase/reductase SDR                                                   | 296  | Lipid transport and metabolism                                | pfam00106              |                        |   |   |
| MFLA_2657 | Enoyl-CoA hydratase/isomerase                                                             | 296  | Lipid transport and metabolism                                | pfam00378              |                        |   |   |
| MFLA_0162 | alpha/beta hydrolase fold                                                                 | 321  | Lipid transport and metabolism                                | pfam00561              |                        | * |   |
| MFLA_1803 | CDP-diacylglycerol--glycerol-3-phosphate 3-phosphatidyltransferase (EC 2.7.8.5) (IMGterm) | 188  | Lipid transport and metabolism                                | pfam01066              | TIGR00560              |   | * |
| MFLA_0515 | CDP-diacylglycerol--serine O-phosphatidyltransferase (EC 2.7.8.8) (IMGterm)               | 264  | Lipid transport and metabolism                                | pfam01066              | TIGR00473              |   | * |
| MFLA_1525 | phosphatidate cytidyltransferase                                                          | 276  | Lipid transport and metabolism                                | pfam01148              |                        | * | * |
| MFLA_1526 | Undecaprenyl pyrophosphate synthetase (EC 2.5.1.31) (IMGterm)                             | 250  | Lipid transport and metabolism                                | pfam01255              | TIGR00055              |   |   |
| MFLA_0468 | lyso-ornithine lipid acyltransferase (IMGterm)                                            | 259  | Lipid transport and metabolism                                | pfam01553              | TIGR00530              |   |   |
| MFLA_0435 | acyltransferase 3                                                                         | 679  | Lipid transport and metabolism                                | pfam01757              |                        |   | * |

|           |                                                          |     |                                                              |                        |                        |     |
|-----------|----------------------------------------------------------|-----|--------------------------------------------------------------|------------------------|------------------------|-----|
| MFLA_0572 | phosphatidylglycerophosphatase (EC 3.1.3.27) (IMGterm)   | 163 | Lipid transport and metabolism                               | pfam04608              |                        | *   |
| MFLA_1791 | Alpha/beta hydrolase fold-3                              | 281 | Lipid transport and metabolism                               | pfam07859              |                        |     |
| MFLA_0746 | Alpha/beta hydrolase fold-3                              | 331 | Lipid transport and metabolism                               | pfam07859              |                        |     |
| MFLA_2174 | putative acyl-CoA dehydrogenase                          | 382 | Lipid transport and metabolism                               | pfam08028              |                        |     |
| MFLA_1173 | phospholipase D/Transphosphatidylase                     | 450 | Lipid transport and metabolism                               |                        |                        |     |
| MFLA_2383 | adenine phosphoribosyltransferase (EC 2.4.2.7) (IMGterm) | 176 | Nucleotide transport and metabolism                          | pfam00156              | TIGR01090              |     |
| MFLA_1280 | phosphoribosyltransferase                                | 185 | Nucleotide transport and metabolism                          | pfam00156              | TIGR01203              |     |
| MFLA_2616 | NUDIX hydrolase                                          | 146 | Nucleotide transport and metabolism                          | pfam00293              | TIGR00586              |     |
| MFLA_1166 | heat shock protein Hsp20                                 | 81  | Posttranslational modification, protein turnover, chaperones | pfam00011              |                        |     |
| MFLA_1434 | cytochrome c oxidase, subunit I                          | 494 | Posttranslational modification, protein turnover, chaperones | pfam00115              | TIGR00780              | *   |
| MFLA_0611 | Sulfate ABC transporter, permease protein CysT           | 279 | Posttranslational modification, protein turnover, chaperones | pfam00528              | TIGR00969<br>TIGR02139 | *   |
| MFLA_1291 | protoheme IX farnesyltransferase                         | 306 | Posttranslational modification, protein turnover, chaperones | pfam01040              | TIGR01473              | *   |
| MFLA_0396 | peptidase U32                                            | 640 | Posttranslational modification, protein turnover, chaperones | pfam01136<br>pfam12392 |                        |     |
| MFLA_0234 | cytochrome c assembly protein                            | 381 | Posttranslational modification, protein turnover, chaperones | pfam01578              | TIGR03144              |     |
| MFLA_1765 | Urease accessory protein UreF                            | 227 | Posttranslational modification, protein turnover, chaperones | pfam01730              |                        | *   |
| MFLA_1770 | Urease accessory protein UreD                            | 285 | Posttranslational modification, protein turnover, chaperones | pfam01774              |                        |     |
| MFLA_1983 | flagellar protein FliS                                   | 152 | Posttranslational modification, protein turnover, chaperones | pfam02561              | TIGR00208              |     |
| MFLA_2175 | OsmC-like protein                                        | 185 | Posttranslational modification, protein turnover, chaperones | pfam02566              |                        |     |
| MFLA_2618 | protein of unknown function DUF182                       | 334 | Posttranslational modification, protein turnover, chaperones | pfam02625              |                        |     |
| MFLA_1766 | UreE urease accessory-like protein                       | 163 | Posttranslational modification, protein turnover, chaperones | pfam02814<br>pfam05194 |                        |     |
| MFLA_0932 | Leucyltransferase                                        | 244 | Posttranslational modification, protein turnover, chaperones | pfam03588              | TIGR00667              |     |
| MFLA_0931 | Arginyltransferase                                       | 248 | Posttranslational modification, protein turnover, chaperones | pfam04376<br>pfam04377 |                        |     |
| MFLA_1763 | HupE/UreJ protein                                        | 188 | Posttranslational modification, protein turnover, chaperones | pfam04955              |                        | * * |
| MFLA_2246 | hypothetical protein                                     | 244 | Posttranslational modification, protein turnover, chaperones |                        |                        | *   |

|           |                                                                |     |                                                              |                                                  |                        |   |   |
|-----------|----------------------------------------------------------------|-----|--------------------------------------------------------------|--------------------------------------------------|------------------------|---|---|
| MFLA_0547 | hypothetical protein                                           | 390 | Posttranslational modification, protein turnover, chaperones |                                                  |                        | * | * |
| MFLA_1494 | Resolvase-like protein                                         | 186 | Replication, recombination and repair                        | pfam00239<br>pfam02796                           |                        |   |   |
| MFLA_1155 | Recombinase                                                    | 343 | Replication, recombination and repair                        | pfam00239<br>pfam07508                           |                        |   |   |
| MFLA_0404 | putative ATP-dependent DNA helicase-related protein            | 88  | Replication, recombination and repair                        | pfam00270                                        |                        |   |   |
| MFLA_0953 | ATP-dependent DNA helicase RecQ                                | 611 | Replication, recombination and repair                        | pfam00270<br>pfam00271<br>pfam00570<br>pfam09382 | TIGR00614<br>TIGR01389 |   |   |
| MFLA_0052 | ATP-dependent DNA helicase RecG (EC 3.6.1.-) (IMGterm)         | 686 | Replication, recombination and repair                        | pfam00270<br>pfam00271<br>pfam01336              | TIGR00643              |   |   |
| MFLA_1327 | single-strand binding protein/Primosomal replication protein n | 99  | Replication, recombination and repair                        | pfam00436                                        |                        |   |   |
| MFLA_1147 | nuclease (SNase-like)                                          | 206 | Replication, recombination and repair                        | pfam00565                                        |                        | * |   |
| MFLA_1202 | ATP-dependent DNA helicase Rep (EC 3.6.1.-) (IMGterm)          | 690 | Replication, recombination and repair                        | pfam00580                                        | TIGR01074              |   |   |
| MFLA_1314 | phage integrase                                                | 121 | Replication, recombination and repair                        | pfam00589                                        |                        |   |   |
| MFLA_0198 | tyrosine recombinase XerC subunit (IMGterm)                    | 291 | Replication, recombination and repair                        | pfam00589<br>pfam02899                           | TIGR02224              |   |   |
| MFLA_1309 | Integrase, catalytic region                                    | 270 | Replication, recombination and repair                        | pfam00665                                        |                        |   |   |
| MFLA_2548 | Integrase, catalytic region                                    | 518 | Replication, recombination and repair                        | pfam00665                                        |                        |   |   |
| MFLA_1299 | DNA-3-methyladenine glycosylase II                             | 142 | Replication, recombination and repair                        | pfam00730                                        |                        |   |   |
| MFLA_0008 | DNA-directed DNA polymerase                                    | 385 | Replication, recombination and repair                        | pfam00817<br>pfam11798<br>pfam11799              |                        |   |   |
| MFLA_1914 | TatD-related deoxyribonuclease                                 | 268 | Replication, recombination and repair                        | pfam01026                                        | TIGR00010              |   |   |
| MFLA_1516 | RNase HII (EC 3.1.26.4) (IMGterm)                              | 193 | Replication, recombination and repair                        | pfam01351                                        |                        |   |   |
| MFLA_2547 | IstB-like ATP-binding protein                                  | 247 | Replication, recombination and repair                        | pfam01695                                        |                        |   |   |
| MFLA_0477 | protein of unknown function DUF1568                            | 232 | Replication, recombination and repair                        | pfam01797                                        |                        |   |   |
| MFLA_0605 | CRISPR-associated exonuclease, Cas4 family (IMGterm)           | 216 | Replication, recombination and repair                        | pfam01930                                        | TIGR00372              |   |   |
| MFLA_2131 | Exodeoxyribonuclease VII small subunit (EC 3.1.11.6) (IMGterm) | 85  | Replication, recombination and repair                        | pfam02609                                        | TIGR01280              |   |   |
| MFLA_0315 | DNA replication and repair protein RadC (IMGterm)              | 224 | Replication, recombination and repair                        | pfam04002                                        | TIGR00608              |   |   |
| MFLA_2625 |                                                                | 88  | Replication, recombination and repair                        | pfam04002                                        |                        |   |   |
| MFLA_1266 | Radical SAM                                                    | 360 | Replication, recombination and repair                        | pfam04055                                        |                        |   |   |
| MFLA_0223 | DNA polymerase III, chi subunit (EC                            | 154 | Replication, recombination and repair                        | pfam04364                                        |                        | * |   |

|           |                                                                             |      |                                                              |                                                  |           |   |
|-----------|-----------------------------------------------------------------------------|------|--------------------------------------------------------------|--------------------------------------------------|-----------|---|
|           | 2.7.7.7) (IMGterm)                                                          |      |                                                              |                                                  |           |   |
| MFLA_0607 | CRISPR-associated protein, Cas2 family (IMGterm)                            | 97   | Replication, recombination and repair                        | pfam09827                                        | TIGR01573 |   |
| MFLA_1301 | DNA-N1-methyladenine dioxygenase (EC 1.14.11.-) (IMGterm)                   | 241  | Replication, recombination and repair                        |                                                  | TIGR00568 |   |
| MFLA_2624 | hypothetical protein                                                        | 505  | Replication, recombination and repair                        |                                                  |           |   |
| MFLA_2401 | outer membrane transport energization protein TonB (TC 2.C.1.1.1) (IMGterm) | 235  | RNA processing and modification                              |                                                  | TIGR01352 | * |
| MFLA_1442 | fatty acid beta hydroxylase (cytochrome P450)                               | 422  | Secondary metabolites biosynthesis, transport and catabolism | pfam00067                                        |           |   |
| MFLA_1802 | short-chain dehydrogenase/reductase SDR                                     | 264  | Secondary metabolites biosynthesis, transport and catabolism | pfam00106                                        | *         |   |
| MFLA_0238 | protein of unknown function DUF140                                          | 263  | Secondary metabolites biosynthesis, transport and catabolism | pfam02405                                        | TIGR00056 |   |
| MFLA_1239 | Phytanoyl-CoA dioxygenase                                                   | 295  | Secondary metabolites biosynthesis, transport and catabolism | pfam05721                                        |           |   |
| MFLA_0352 | methyl-accepting chemotaxis sensory transducer (IMGterm)                    | 649  | Signal transduction mechanisms                               | pfam00015<br>pfam02743                           | *         | * |
| MFLA_0320 | protein serine/threonine phosphatases                                       | 565  | Signal transduction mechanisms                               | pfam00069<br>pfam00481                           |           | * |
| MFLA_1736 | response regulator receiver domain protein (CheY-like)                      | 134  | Signal transduction mechanisms                               | pfam00072                                        |           |   |
| MFLA_1282 | response regulator receiver domain protein (CheY-like)                      | 164  | Signal transduction mechanisms                               | pfam00072                                        |           |   |
| MFLA_0531 | two component transcriptional regulator, LuxR family (IMGterm)              | 219  | Signal transduction mechanisms                               | pfam00072<br>pfam00196                           |           |   |
| MFLA_1762 | periplasmic sensor hybrid histidine kinase                                  | 1146 | Signal transduction mechanisms                               | pfam00072<br>pfam00512<br>pfam02518              |           | * |
| MFLA_0159 | transcriptional regulator, LuxR family (IMGterm)                            | 381  | Signal transduction mechanisms                               | pfam00196                                        |           |   |
| MFLA_1571 | adenylate/guanylate cyclase (IMGterm)                                       | 426  | Signal transduction mechanisms                               | pfam00211                                        |           | * |
| MFLA_2067 | phosphohistidine phosphatase, SixA (IMGterm)                                | 150  | Signal transduction mechanisms                               | pfam00300                                        | TIGR00249 |   |
| MFLA_0494 | FHA domain containing protein                                               | 236  | Signal transduction mechanisms                               | pfam00498                                        |           |   |
| MFLA_2738 | periplasmic sensor signal transduction histidine kinase                     | 425  | Signal transduction mechanisms                               | pfam00512<br>pfam00672<br>pfam02518              | *         | * |
| MFLA_2395 | periplasmic sensor signal transduction histidine kinase                     | 686  | Signal transduction mechanisms                               | pfam00512<br>pfam02518<br>pfam07695<br>pfam07696 | *         | * |

|           |                                                                                              |     |                                |                                     |           |   |   |
|-----------|----------------------------------------------------------------------------------------------|-----|--------------------------------|-------------------------------------|-----------|---|---|
| MFLA_2449 | signal transduction histidine kinase, nitrogen specific, NtrB (EC 2.7.13.3) (IMGterm)        | 365 | Signal transduction mechanisms | pfam00512<br>pfam02518<br>pfam08448 | TIGR00229 |   |   |
| MFLA_0612 | diguanylate phosphodiesterase (EAL domain)                                                   | 197 | Signal transduction mechanisms | pfam00563                           |           |   |   |
| MFLA_0608 | putative signaling membrane protein                                                          | 516 | Signal transduction mechanisms | pfam00563                           |           | * |   |
| MFLA_2422 | diguanylate cyclase/phosphodiesterase (IMGterm)                                              | 617 | Signal transduction mechanisms | pfam00563<br>pfam00571<br>pfam00990 | TIGR00254 |   |   |
| MFLA_1388 | diguanylate cyclase/phosphodiesterase (IMGterm)                                              | 806 | Signal transduction mechanisms | pfam00563<br>pfam00990              | TIGR00254 |   |   |
| MFLA_0019 | CBS domain containing membrane protein                                                       | 410 | Signal transduction mechanisms | pfam00571<br>pfam04982              |           |   |   |
| MFLA_1198 | diguanylate cyclase (GGDEF domain)                                                           | 394 | Signal transduction mechanisms | pfam00990                           | TIGR00254 |   | * |
| MFLA_0429 | diguanylate cyclase (IMGterm)                                                                | 469 | Signal transduction mechanisms | pfam00990                           | TIGR00254 | * | * |
| MFLA_1232 | transcriptional regulators, TraR/DksA family                                                 | 139 | Signal transduction mechanisms | pfam01258                           | TIGR02420 |   |   |
| MFLA_2589 | CheB methyltransferase (IMGterm)                                                             | 202 | Signal transduction mechanisms | pfam01339                           |           |   |   |
| MFLA_1880 | transcriptional regulator, BolA protein family (IMGterm)                                     | 92  | Signal transduction mechanisms | pfam01722                           |           |   |   |
| MFLA_2588 | MCP methyltransferase, CheR-type (IMGterm)                                                   | 286 | Signal transduction mechanisms | pfam01739<br>pfam03705              |           |   |   |
| MFLA_2201 | periplasmic sensor signal transduction histidine kinase                                      | 430 | Signal transduction mechanisms | pfam02518                           |           | * | * |
| MFLA_0448 | putative signal transduction histidine kinase                                                | 615 | Signal transduction mechanisms | pfam02518<br>pfam07695              |           | * | * |
| MFLA_0444 | signal transduction histidine kinase, nitrate/nitrite-specific, NarQ (EC 2.7.13.3) (IMGterm) | 603 | Signal transduction mechanisms | pfam02518<br>pfam07730              |           | * | * |
| MFLA_0329 | response regulator receiver and ANTAR domain protein (IMGterm)                               | 464 | Signal transduction mechanisms | pfam03861<br>pfam08376              |           |   |   |
| MFLA_0330 | serine/threonine protein kinase (IMGterm)                                                    | 574 | Transcription                  | pfam00069<br>pfam07228              |           |   | * |
| MFLA_2538 | two component transcriptional regulator, winged helix family (IMGterm)                       | 226 | Transcription                  | pfam00072<br>pfam00486              |           |   |   |
| MFLA_2202 | response regulator receiver domain protein (CheY-like)                                       | 183 | Transcription                  | pfam00072<br>pfam02954              |           |   |   |
| MFLA_2575 | transcriptional regulator, LysR family (IMGterm)                                             | 298 | Transcription                  | pfam00126<br>pfam03466              |           | * |   |
| MFLA_0402 | transcriptional regulator, LysR family (IMGterm)                                             | 295 | Transcription                  | pfam00126<br>pfam03466              |           |   |   |
| MFLA_2570 | transcriptional regulator, LysR family                                                       | 295 | Transcription                  | pfam00126                           |           |   |   |

|           |                                                                        |     |               |                                     |                        |
|-----------|------------------------------------------------------------------------|-----|---------------|-------------------------------------|------------------------|
|           | (IMGterm)                                                              |     |               | pfam03466                           |                        |
| MFLA_2592 | transcriptional regulator, LysR family (IMGterm)                       | 299 | Transcription | pfam00126<br>pfam03466              |                        |
| MFLA_1149 | transcriptional regulator, LysR family (IMGterm)                       | 305 | Transcription | pfam00126<br>pfam03466              |                        |
| MFLA_1790 | transcriptional regulator, LysR family (IMGterm)                       | 338 | Transcription | pfam00126<br>pfam03466              |                        |
| MFLA_0702 | RNA polymerase, sigma 32 subunit, RpoH (IMGterm)                       | 285 | Transcription | pfam00140<br>pfam04542<br>pfam04545 | TIGR02392<br>TIGR02937 |
| MFLA_0899 | sigma54 specific transcriptional regulator with GAF sensor, Fis family | 632 | Transcription | pfam00158<br>pfam01590<br>pfam02954 |                        |
| MFLA_0397 | transcriptional regulator, AraC family (IMGterm)                       | 327 | Transcription | pfam00165                           |                        |
| MFLA_1180 | transcriptional regulator, AraC family (IMGterm)                       | 320 | Transcription | pfam00165<br>pfam01965              |                        |
| MFLA_2370 | transcriptional regulator, AraC family (IMGterm)                       | 275 | Transcription | pfam00165<br>pfam02311              |                        |
| MFLA_0587 | transcriptional regulator, AraC family (IMGterm)                       | 346 | Transcription | pfam00165<br>pfam06719              |                        |
| MFLA_2409 | transcriptional regulator, LuxR family (IMGterm)                       | 272 | Transcription | pfam00196                           | TIGR03020              |
| MFLA_2346 | transcriptional regulator, LacI family (IMGterm)                       | 341 | Transcription | pfam00356<br>pfam00532              |                        |
| MFLA_0693 | transcriptional regulator, MerR family (IMGterm)                       | 153 | Transcription | pfam00376<br>pfam09278              | TIGR02047              |
| MFLA_0368 | transcriptional regulator, TetR family (IMGterm)                       | 184 | Transcription | pfam00440                           |                        |
| MFLA_0355 | transcriptional regulator, TetR family (IMGterm)                       | 192 | Transcription | pfam00440                           |                        |
| MFLA_0170 | transcriptional regulator, TetR family (IMGterm)                       | 233 | Transcription | pfam00440<br>pfam09209              |                        |
| MFLA_0370 | transcriptional regulator, ArsR family (IMGterm)                       | 103 | Transcription | pfam01022                           |                        |
| MFLA_2359 | transcriptional regulator, MarR family (IMGterm)                       | 176 | Transcription | pfam01047                           |                        |
| MFLA_1855 | transcriptional regulator, CopG family (IMGterm)                       | 156 | Transcription | pfam01402<br>pfam08753              | TIGR02793              |
| MFLA_1800 | putative transcriptional regulator                                     | 128 | Transcription | pfam01638                           |                        |
| MFLA_2681 | sigma-24 (FecI-like)                                                   | 179 | Transcription | pfam04542<br>pfam08281              | TIGR02937              |

|           |                                                                |      |                                                 |                                     |                        |   |   |
|-----------|----------------------------------------------------------------|------|-------------------------------------------------|-------------------------------------|------------------------|---|---|
| MFLA_0217 | sigma-24 (FecI-like)                                           | 196  | Transcription                                   | pfam04542<br>pfam08281              | TIGR02937              |   |   |
| MFLA_1353 | sigma-24 (FecI-like)                                           | 171  | Transcription                                   | pfam08281                           | TIGR02937              |   |   |
| MFLA_2714 | hypothetical protein                                           | 104  | Transcription                                   |                                     |                        |   |   |
| MFLA_0277 | translation elongation factor 1A (EF-1A/EF-Tu) (IMGterm)       | 396  | Translation, ribosomal structure and biogenesis | pfam00009<br>pfam03143<br>pfam03144 | TIGR00231<br>TIGR00485 |   |   |
| MFLA_2182 | RNA methyltransferase TrmH, group 2                            | 154  | Translation, ribosomal structure and biogenesis | pfam00588                           | TIGR00185              |   |   |
| MFLA_1109 | Glutamate--tRNA ligase                                         | 299  | Translation, ribosomal structure and biogenesis | pfam00749                           |                        |   |   |
| MFLA_0539 | bacterial translation initiation factor 1 (bIF-1) (IMGterm)    | 88   | Translation, ribosomal structure and biogenesis | pfam01176                           | TIGR00008              |   |   |
| MFLA_1265 | heat shock protein Hsp15 (IMGterm)                             | 131  | Translation, ribosomal structure and biogenesis | pfam01479                           |                        | * |   |
| MFLA_2211 | SSU ribosomal protein S20P (IMGterm)                           | 87   | Translation, ribosomal structure and biogenesis | pfam01649                           | TIGR00029              |   |   |
| MFLA_0782 | 23S rRNA Um-2552 2'-O-methyltransferase (EC 2.1.1.-) (IMGterm) | 207  | Translation, ribosomal structure and biogenesis | pfam01728                           | TIGR00438              |   |   |
| MFLA_1425 | methyltransferase small                                        | 321  | Translation, ribosomal structure and biogenesis | pfam05175                           | TIGR00536              |   |   |
| MFLA_1303 | putative GNAT-family acetyltransferase                         | 237  | Translation, ribosomal structure and biogenesis |                                     |                        |   |   |
| MFLA_0690 | von Willebrand factor, type A                                  | 326  |                                                 | pfam00092                           |                        | * | * |
| MFLA_1898 | von Willebrand factor, type A                                  | 326  |                                                 | pfam00092                           |                        |   | * |
| MFLA_2749 | ATP synthase F0, C subunit                                     | 90   |                                                 | pfam00137                           | TIGR01260              |   | * |
| MFLA_1349 | Hemolysin-type calcium-binding region                          | 744  |                                                 | pfam00353                           |                        |   |   |
| MFLA_0301 | LSU ribosomal protein L36P (IMGterm)                           | 37   |                                                 | pfam00444                           | TIGR01022              |   |   |
| MFLA_1288 | LSU ribosomal protein L36P (IMGterm)                           | 41   |                                                 | pfam00444                           | TIGR01022              |   |   |
| MFLA_2761 | LSU ribosomal protein L34P (IMGterm)                           | 44   |                                                 | pfam00468                           | TIGR01030              |   |   |
| MFLA_1906 | hypothetical protein                                           | 153  |                                                 | pfam00578                           |                        | * |   |
| MFLA_2716 | hypothetical protein                                           | 594  |                                                 | pfam00665                           |                        |   |   |
| MFLA_2686 | hypothetical protein                                           | 133  |                                                 | pfam00877                           |                        |   |   |
| MFLA_0557 | protein of unknown function DUF6, transmembrane                | 305  |                                                 | pfam00892                           |                        |   | * |
| MFLA_2614 | transcriptional regulator, ArsR family (IMGterm)               | 121  |                                                 | pfam01022                           |                        |   |   |
| MFLA_2705 | transcriptional regulators, TraR/DksA family                   | 72   |                                                 | pfam01258                           |                        |   |   |
| MFLA_2393 | protein of unknown function DUF11                              | 1809 |                                                 | pfam01345<br>pfam05738              | TIGR01451              | * | * |
| MFLA_1645 | peptidase A24A, prepilin type IV                               | 164  |                                                 | pfam01478                           |                        |   | * |



|           |                                                                       |     |           |                        |   |
|-----------|-----------------------------------------------------------------------|-----|-----------|------------------------|---|
| MFLA_1488 | hypothetical protein                                                  | 55  | pfam01526 |                        |   |
| MFLA_0786 | phosphoesterase, PA-phosphatase related                               | 179 | pfam01569 |                        | * |
| MFLA_2110 | protein of unknown function YGGT                                      | 191 | pfam02325 |                        | * |
| MFLA_2030 | Abortive infection protein                                            | 225 | pfam02517 | TIGR03008              | * |
| MFLA_2598 | hypothetical protein                                                  | 137 | pfam03203 |                        | * |
| MFLA_2706 | bacteriophage lysis protein                                           | 194 | pfam03245 |                        | * |
| MFLA_0356 | protein of unknown function UPF0153                                   | 84  | pfam03692 |                        |   |
| MFLA_2751 | ATP synthase protein I                                                | 128 | pfam03899 |                        | * |
| MFLA_1376 | GtrA-like protein                                                     | 131 | pfam04138 | *                      | * |
| MFLA_2698 | hypothetical protein                                                  | 306 | pfam04233 |                        |   |
| MFLA_0335 | hypothetical protein                                                  | 67  | pfam04328 |                        |   |
| MFLA_1338 | putative transmembrane protein                                        | 183 | pfam04350 | *                      | * |
| MFLA_2677 | hypothetical protein                                                  | 482 | pfam04575 | *                      |   |
| MFLA_1126 | hypothetical protein                                                  | 442 | pfam04575 |                        |   |
| MFLA_1127 | hypothetical protein                                                  | 410 | pfam04773 | *                      |   |
| MFLA_2623 | VanZ like protein                                                     | 136 | pfam04892 |                        | * |
| MFLA_2417 | Fimbrial assembly                                                     | 179 | pfam05137 |                        |   |
| MFLA_1943 | flagellar transcriptional activator                                   | 105 | pfam05247 |                        |   |
| MFLA_2236 | hypothetical protein                                                  | 138 | pfam05258 |                        |   |
| MFLA_1942 | flagellar transcriptional activator FlhC                              | 182 | pfam05280 |                        |   |
| MFLA_1982 | flagellar protein FlhT                                                | 113 | pfam05400 |                        |   |
| MFLA_0895 | hypothetical protein                                                  | 89  | pfam05488 |                        |   |
| MFLA_0631 | hypothetical protein                                                  | 56  | pfam05545 |                        | * |
| MFLA_1787 | Conserved TM helix                                                    | 494 | pfam05552 |                        | * |
| MFLA_1458 | hypothetical protein                                                  | 349 | pfam05707 |                        | * |
| MFLA_0831 | bacteriophage replication gene A                                      | 563 | pfam05840 |                        |   |
| MFLA_1836 | hypothetical protein                                                  | 151 | pfam06146 |                        | * |
| MFLA_2728 | protein of unknown function DUF1018                                   | 144 | pfam06252 |                        |   |
| MFLA_0925 | hypothetical protein                                                  | 85  | pfam06305 | *                      | * |
| MFLA_2668 | hypothetical protein                                                  | 78  | pfam06474 | *                      |   |
| MFLA_1310 | transposase IS3/IS911                                                 | 102 | pfam06627 |                        |   |
| MFLA_0865 | Antimicrobial peptide resistance and lipid A acylation PagP (IMGterm) | 184 | pfam07017 | *                      |   |
| MFLA_0947 | protein of unknown function DUF1328                                   | 55  | pfam07043 | *                      | * |
| MFLA_2398 | hypothetical protein                                                  | 133 | pfam07589 | TIGR02595              | * |
| MFLA_2005 | hypothetical protein                                                  | 148 | pfam07589 | TIGR02595              | * |
| MFLA_2006 | hypothetical protein                                                  | 159 | pfam07589 | TIGR02595              | * |
| MFLA_2397 | hypothetical protein                                                  | 177 | pfam07589 | TIGR02595<br>TIGR03370 | * |
| MFLA_2062 | hypothetical protein                                                  | 182 | pfam07589 | TIGR02595              | * |
| MFLA_0088 | hypothetical protein                                                  | 211 | pfam07589 | TIGR02595              | * |

|           |                                                  |     |                        |                        |   |   |
|-----------|--------------------------------------------------|-----|------------------------|------------------------|---|---|
| MFLA_2731 | hypothetical protein                             | 217 | pfam07589              | TIGR02595              | * |   |
| MFLA_2427 | hypothetical protein                             | 231 | pfam07589              | TIGR02595              | * |   |
| MFLA_1122 | hypothetical protein                             | 243 | pfam07589              | TIGR02595              | * | * |
| MFLA_2253 | hypothetical protein                             | 248 | pfam07589              | TIGR02595              | * |   |
| MFLA_2408 | hypothetical protein                             | 252 | pfam07589              | TIGR02595              | * |   |
| MFLA_1205 | hypothetical protein                             | 256 | pfam07589              | TIGR02595              | * | * |
| MFLA_0709 | hypothetical protein                             | 261 | pfam07589              | TIGR02595              | * |   |
| MFLA_1750 | hypothetical protein                             | 315 | pfam07589              | TIGR02595              | * | * |
| MFLA_2396 | protein of unknown function DUF1555              | 166 | pfam07589              | TIGR02595<br>TIGR03370 | * |   |
| MFLA_1844 | protein of unknown function DUF1555              | 178 | pfam07589              | TIGR02595              | * |   |
| MFLA_1132 | protein of unknown function DUF1555              | 188 | pfam07589              | TIGR02595              | * | * |
| MFLA_2195 | protein of unknown function DUF1555              | 199 | pfam07589              | TIGR02595              | * | * |
| MFLA_1602 | protein of unknown function DUF1555              | 205 | pfam07589              | TIGR02595              | * |   |
| MFLA_0151 | protein of unknown function DUF1555              | 214 | pfam07589              | TIGR02595              | * |   |
| MFLA_1601 | protein of unknown function DUF1555              | 218 | pfam07589              | TIGR02595              | * |   |
| MFLA_1718 | protein of unknown function DUF1555              | 226 | pfam07589              | TIGR02595              | * |   |
| MFLA_1203 | protein of unknown function DUF1555              | 242 | pfam07589              | TIGR02595              | * |   |
| MFLA_2194 | protein of unknown function DUF1555              | 243 | pfam07589              | TIGR02595              | * |   |
| MFLA_2279 | protein of unknown function DUF1555              | 253 | pfam07589              | TIGR02595              | * |   |
| MFLA_2756 | protein of unknown function DUF1555              | 338 | pfam07589              | TIGR02595              | * |   |
| MFLA_1598 | protein of unknown function DUF1555              | 263 | pfam07589              | TIGR02595              |   |   |
| MFLA_1123 | hypothetical protein                             | 242 | pfam07589<br>pfam07603 | TIGR02595              | * | * |
| MFLA_2310 | major facilitator superfamily MFS_1              | 389 | pfam07690              |                        | * | * |
| MFLA_2630 | major facilitator superfamily MFS_1              | 403 | pfam07690              |                        | * | * |
| MFLA_2483 | major facilitator superfamily MFS_1              | 411 | pfam07690              | TIGR00901              | * | * |
| MFLA_2584 | protein of unknown function DUF1656              | 65  | pfam07869              |                        |   | * |
| MFLA_0021 | coenzyme PQQ biosynthesis protein A              | 52  | pfam08042              | TIGR02107              |   |   |
| MFLA_1719 | Sell                                             | 60  | pfam08238              |                        |   |   |
| MFLA_0443 | putative PAS/PAC sensor protein                  | 465 | pfam08447              | TIGR00229              | * | * |
| MFLA_1270 | NDP-hexose 3-C-methyltransferase TylCIII         | 178 | pfam08484              |                        |   |   |
| MFLA_0202 | sulfur compound chelating protein SoxZ (IMGterm) | 116 | pfam08770              |                        |   |   |
| MFLA_2690 | hypothetical protein                             | 101 | pfam08809              |                        |   |   |
| MFLA_2687 | hypothetical protein                             | 180 | pfam08875              |                        |   |   |
| MFLA_0854 | hypothetical protein                             | 145 | pfam08897              |                        |   |   |
| MFLA_2512 | hypothetical protein                             | 263 | pfam09694              | TIGR02001              | * |   |
| MFLA_2023 | hypothetical protein                             | 295 | pfam09721              | TIGR02602<br>TIGR03113 |   | * |

|           |                                                |     |           |           |   |   |
|-----------|------------------------------------------------|-----|-----------|-----------|---|---|
| MFLA_1776 | Glutamine amidotransferase, class-II           | 124 | pfam09723 | TIGR02605 |   |   |
| MFLA_2608 |                                                | 120 | pfam09994 |           |   |   |
| MFLA_1312 | hypothetical protein                           | 60  | pfam10049 |           |   |   |
| MFLA_0949 | hypothetical protein                           | 231 | pfam10677 |           | * |   |
| MFLA_0672 | hypothetical protein                           | 80  | pfam10685 |           | * |   |
| MFLA_1427 | hypothetical protein                           | 60  | pfam10685 |           |   |   |
| MFLA_2704 | hypothetical protein                           | 111 | pfam10805 |           |   | * |
| MFLA_1165 | hypothetical protein                           | 224 | pfam10938 |           |   |   |
| MFLA_2730 | hypothetical protein                           | 80  | pfam10982 |           |   |   |
| MFLA_0706 | hypothetical protein                           | 183 | pfam10986 |           | * | * |
| MFLA_2047 | hypothetical protein                           | 97  | pfam10993 |           |   | * |
| MFLA_2378 | hypothetical protein                           | 150 | pfam11026 |           |   | * |
| MFLA_1812 | hypothetical protein                           | 62  | pfam11127 |           | * | * |
| MFLA_1156 | hypothetical protein                           | 149 | pfam11149 |           |   |   |
| MFLA_0017 | hypothetical protein                           | 48  | pfam11295 |           |   |   |
| MFLA_2586 | hypothetical protein                           | 64  | pfam11450 |           | * |   |
| MFLA_1816 | hypothetical protein                           | 168 | pfam11454 |           |   |   |
| MFLA_0366 | hypothetical protein                           | 177 | pfam11684 |           | * | * |
| MFLA_1191 | hypothetical protein                           | 145 | pfam11697 |           |   |   |
| MFLA_1110 | hypothetical protein                           | 108 | pfam11743 |           |   |   |
| MFLA_1414 | hypothetical protein                           | 52  | pfam11752 |           | * | * |
| MFLA_0105 | hypothetical protein                           | 85  | pfam11903 |           |   |   |
| MFLA_0442 | hypothetical protein                           | 347 | pfam11927 |           |   |   |
| MFLA_2466 | hypothetical protein                           | 192 | pfam11948 |           |   |   |
| MFLA_2702 | hypothetical protein                           | 185 | pfam11985 |           |   |   |
| MFLA_0218 | putative transmembrane protein                 | 122 | pfam12279 |           |   |   |
| MFLA_0683 | ABC transporter, permease protein,<br>putative | 248 |           |           | * | * |
| MFLA_1924 | acetyltransferase, GNAT family                 | 61  |           |           |   |   |
| MFLA_2641 | acyl carrier protein                           | 43  |           |           |   |   |
| MFLA_1430 | copper resistance D                            | 274 |           |           |   | * |
| MFLA_0524 | GCN5-related N-acetyltransferase               | 158 |           |           |   |   |
| MFLA_1146 | Hemerythrin HHE cation binding region          | 146 |           |           |   |   |
| MFLA_1633 | hypothetical protein                           | 64  |           |           | * | * |
| MFLA_0328 | hypothetical protein                           | 81  |           |           | * |   |
| MFLA_1461 | hypothetical protein                           | 81  |           |           | * | * |
| MFLA_1435 | hypothetical protein                           | 82  |           |           | * | * |
| MFLA_1443 | hypothetical protein                           | 87  |           |           | * |   |
| MFLA_0668 | hypothetical protein                           | 88  |           |           | * |   |
| MFLA_2627 | hypothetical protein                           | 93  |           |           | * |   |
| MFLA_0501 | hypothetical protein                           | 94  |           |           | * | * |

|           |                      |     |   |   |
|-----------|----------------------|-----|---|---|
| MFLA_2593 | hypothetical protein | 96  | * |   |
| MFLA_2670 | hypothetical protein | 96  | * |   |
| MFLA_1420 | hypothetical protein | 97  | * |   |
| MFLA_1901 | hypothetical protein | 104 | * |   |
| MFLA_0135 | hypothetical protein | 111 | * |   |
| MFLA_0375 | hypothetical protein | 112 | * | * |
| MFLA_0533 | hypothetical protein | 114 | * | * |
| MFLA_0825 | hypothetical protein | 116 | * |   |
| MFLA_2320 | hypothetical protein | 117 | * |   |
| MFLA_2470 | hypothetical protein | 118 | * | * |
| MFLA_0822 | hypothetical protein | 119 | * |   |
| MFLA_0933 | hypothetical protein | 121 | * |   |
| MFLA_1187 | hypothetical protein | 128 | * |   |
| MFLA_2178 | hypothetical protein | 131 | * | * |
| MFLA_1446 | hypothetical protein | 136 | * | * |
| MFLA_1316 | hypothetical protein | 143 | * |   |
| MFLA_1779 | hypothetical protein | 148 | * |   |
| MFLA_0526 | hypothetical protein | 157 | * | * |
| MFLA_1903 | hypothetical protein | 157 | * | * |
| MFLA_0082 | hypothetical protein | 160 | * |   |
| MFLA_2448 | hypothetical protein | 160 | * |   |
| MFLA_2713 | hypothetical protein | 161 | * |   |
| MFLA_1439 | hypothetical protein | 165 | * | * |
| MFLA_2595 | hypothetical protein | 169 | * | * |
| MFLA_0710 | hypothetical protein | 170 | * |   |
| MFLA_1374 | hypothetical protein | 174 | * |   |
| MFLA_1337 | hypothetical protein | 177 | * |   |
| MFLA_0691 | hypothetical protein | 178 | * | * |
| MFLA_1899 | hypothetical protein | 178 | * | * |
| MFLA_1724 | hypothetical protein | 181 | * |   |
| MFLA_0121 | hypothetical protein | 189 | * |   |
| MFLA_0081 | hypothetical protein | 204 | * |   |
| MFLA_1941 | hypothetical protein | 212 | * | * |
| MFLA_0367 | hypothetical protein | 218 | * |   |
| MFLA_2399 | hypothetical protein | 219 | * | * |
| MFLA_0789 | hypothetical protein | 233 | * |   |
| MFLA_1713 | hypothetical protein | 237 | * | * |
| MFLA_0844 | hypothetical protein | 245 | * |   |
| MFLA_1207 | hypothetical protein | 245 | * |   |
| MFLA_0058 | hypothetical protein | 249 | * |   |
| MFLA_2678 | hypothetical protein | 259 | * |   |

|           |                      |     |   |   |
|-----------|----------------------|-----|---|---|
| MFLA_0787 | hypothetical protein | 277 | * |   |
| MFLA_1720 | hypothetical protein | 277 | * |   |
| MFLA_0766 | hypothetical protein | 298 | * | * |
| MFLA_1897 | hypothetical protein | 318 | * | * |
| MFLA_1344 | hypothetical protein | 326 | * |   |
| MFLA_0157 | hypothetical protein | 382 | * |   |
| MFLA_1460 | hypothetical protein | 459 | * | * |
| MFLA_0324 | hypothetical protein | 472 | * |   |
| MFLA_1424 | hypothetical protein | 497 | * |   |
| MFLA_0083 | hypothetical protein | 501 | * |   |
| MFLA_2400 | hypothetical protein | 551 | * |   |
| MFLA_0164 | hypothetical protein | 35  |   |   |
| MFLA_1609 | hypothetical protein | 37  |   |   |
| MFLA_0406 | hypothetical protein | 55  |   |   |
| MFLA_2442 | hypothetical protein | 62  |   | * |
| MFLA_2711 | hypothetical protein | 63  |   |   |
| MFLA_0909 | hypothetical protein | 68  |   |   |
| MFLA_1157 | hypothetical protein | 70  |   |   |
| MFLA_1181 | hypothetical protein | 70  |   |   |
| MFLA_1716 | hypothetical protein | 72  |   | * |
| MFLA_2671 | hypothetical protein | 73  |   |   |
| MFLA_2697 | hypothetical protein | 76  |   |   |
| MFLA_1440 | hypothetical protein | 77  |   |   |
| MFLA_1797 | hypothetical protein | 77  |   |   |
| MFLA_2725 | hypothetical protein | 77  |   |   |
| MFLA_0536 | hypothetical protein | 78  |   |   |
| MFLA_0538 | hypothetical protein | 78  |   |   |
| MFLA_1923 | hypothetical protein | 78  |   |   |
| MFLA_1167 | hypothetical protein | 79  |   |   |
| MFLA_1228 | hypothetical protein | 79  |   | * |
| MFLA_1311 | hypothetical protein | 79  |   | * |
| MFLA_1152 | hypothetical protein | 80  |   |   |
| MFLA_1608 | hypothetical protein | 80  |   |   |
| MFLA_0875 | hypothetical protein | 81  |   |   |
| MFLA_1453 | hypothetical protein | 81  |   |   |
| MFLA_1841 | hypothetical protein | 81  |   | * |
| MFLA_2740 | hypothetical protein | 81  |   | * |
| MFLA_0835 | hypothetical protein | 82  |   | * |
| MFLA_1629 | hypothetical protein | 82  |   |   |
| MFLA_0466 | hypothetical protein | 83  |   | * |
| MFLA_0660 | hypothetical protein | 83  |   |   |

|           |                      |     |   |
|-----------|----------------------|-----|---|
| MFLA_0666 | hypothetical protein | 83  |   |
| MFLA_1562 | hypothetical protein | 83  |   |
| MFLA_2177 | hypothetical protein | 83  |   |
| MFLA_1462 | hypothetical protein | 84  |   |
| MFLA_0957 | hypothetical protein | 85  |   |
| MFLA_0747 | hypothetical protein | 86  |   |
| MFLA_0894 | hypothetical protein | 86  |   |
| MFLA_1423 | hypothetical protein | 86  | * |
| MFLA_2367 | hypothetical protein | 87  |   |
| MFLA_1463 | hypothetical protein | 88  |   |
| MFLA_2712 | hypothetical protein | 88  |   |
| MFLA_2722 | hypothetical protein | 89  |   |
| MFLA_1300 | hypothetical protein | 90  |   |
| MFLA_0826 | hypothetical protein | 92  | * |
| MFLA_0934 | hypothetical protein | 93  | * |
| MFLA_1415 | hypothetical protein | 93  |   |
| MFLA_1627 | hypothetical protein | 93  |   |
| MFLA_2718 | hypothetical protein | 93  |   |
| MFLA_0176 | hypothetical protein | 94  |   |
| MFLA_0832 | hypothetical protein | 94  |   |
| MFLA_2200 | hypothetical protein | 94  |   |
| MFLA_0460 | hypothetical protein | 97  |   |
| MFLA_0613 | hypothetical protein | 97  |   |
| MFLA_2727 | hypothetical protein | 97  | * |
| MFLA_2127 | hypothetical protein | 98  |   |
| MFLA_1211 | hypothetical protein | 100 | * |
| MFLA_2703 | hypothetical protein | 102 |   |
| MFLA_2719 | hypothetical protein | 102 | * |
| MFLA_0337 | hypothetical protein | 103 |   |
| MFLA_0395 | hypothetical protein | 104 | * |
| MFLA_1121 | hypothetical protein | 104 |   |
| MFLA_0207 | hypothetical protein | 105 |   |
| MFLA_0830 | hypothetical protein | 106 |   |
| MFLA_2224 | hypothetical protein | 106 |   |
| MFLA_2515 | hypothetical protein | 106 |   |
| MFLA_2735 | hypothetical protein | 106 |   |
| MFLA_1190 | hypothetical protein | 108 |   |
| MFLA_1459 | hypothetical protein | 108 | * |
| MFLA_2565 | hypothetical protein | 108 |   |
| MFLA_1827 | hypothetical protein | 113 | * |
| MFLA_2691 | hypothetical protein | 113 |   |

|           |                      |     |           |
|-----------|----------------------|-----|-----------|
| MFLA_2180 | hypothetical protein | 114 | *         |
| MFLA_0464 | hypothetical protein | 115 |           |
| MFLA_1595 | hypothetical protein | 115 |           |
| MFLA_0481 | hypothetical protein | 116 |           |
| MFLA_0216 | hypothetical protein | 117 |           |
| MFLA_2555 | hypothetical protein | 119 |           |
| MFLA_0711 | hypothetical protein | 120 |           |
| MFLA_2070 | hypothetical protein | 122 | *         |
| MFLA_0566 | hypothetical protein | 123 |           |
| MFLA_1366 | hypothetical protein | 123 | *         |
| MFLA_0564 | hypothetical protein | 124 |           |
| MFLA_2078 | hypothetical protein | 125 |           |
| MFLA_2165 | hypothetical protein | 128 | *         |
| MFLA_2613 | hypothetical protein | 128 |           |
| MFLA_2723 | hypothetical protein | 128 |           |
| MFLA_0407 | hypothetical protein | 130 |           |
| MFLA_0820 | hypothetical protein | 130 | *         |
| MFLA_2084 | hypothetical protein | 130 |           |
| MFLA_1818 | hypothetical protein | 133 |           |
| MFLA_2688 | hypothetical protein | 133 |           |
| MFLA_2649 | hypothetical protein | 134 |           |
| MFLA_2569 | hypothetical protein | 139 | *         |
| MFLA_1537 | hypothetical protein | 141 | TIGR02246 |
| MFLA_2726 | hypothetical protein | 141 |           |
| MFLA_0534 | hypothetical protein | 142 |           |
| MFLA_0014 | hypothetical protein | 144 |           |
| MFLA_1151 | hypothetical protein | 147 |           |
| MFLA_0781 | hypothetical protein | 151 | *         |
| MFLA_0824 | hypothetical protein | 154 |           |
| MFLA_0398 | hypothetical protein | 155 | *         |
| MFLA_0553 | hypothetical protein | 158 |           |
| MFLA_2693 | hypothetical protein | 161 |           |
| MFLA_0829 | hypothetical protein | 162 |           |
| MFLA_1290 | hypothetical protein | 163 | *         |
| MFLA_2694 | hypothetical protein | 165 |           |
| MFLA_2720 | hypothetical protein | 168 |           |
| MFLA_1178 | hypothetical protein | 169 |           |
| MFLA_1396 | hypothetical protein | 169 |           |
| MFLA_1741 | hypothetical protein | 169 |           |
| MFLA_1339 | hypothetical protein | 174 | *         |
| MFLA_0376 | hypothetical protein | 181 |           |

|           |                                                                  |     |   |   |
|-----------|------------------------------------------------------------------|-----|---|---|
| MFLA_0828 | hypothetical protein                                             | 185 |   |   |
| MFLA_1431 | hypothetical protein                                             | 186 |   | * |
| MFLA_2245 | hypothetical protein                                             | 189 |   |   |
| MFLA_2416 | hypothetical protein                                             | 197 |   | * |
| MFLA_0440 | hypothetical protein                                             | 199 |   |   |
| MFLA_0823 | hypothetical protein                                             | 199 |   |   |
| MFLA_1740 | hypothetical protein                                             | 205 |   |   |
| MFLA_2683 | hypothetical protein                                             | 205 |   |   |
| MFLA_0767 | hypothetical protein                                             | 208 |   | * |
| MFLA_1756 | hypothetical protein                                             | 208 |   |   |
| MFLA_1778 | hypothetical protein                                             | 216 |   |   |
| MFLA_2597 | hypothetical protein                                             | 217 |   |   |
| MFLA_2695 | hypothetical protein                                             | 219 |   |   |
| MFLA_2684 | hypothetical protein                                             | 225 |   |   |
| MFLA_2692 | hypothetical protein                                             | 253 |   |   |
| MFLA_2418 | hypothetical protein                                             | 255 |   |   |
| MFLA_0362 | hypothetical protein                                             | 260 |   | * |
| MFLA_0308 | hypothetical protein                                             | 262 |   |   |
| MFLA_0473 | hypothetical protein                                             | 267 |   | * |
| MFLA_0827 | hypothetical protein                                             | 268 |   |   |
| MFLA_1340 | hypothetical protein                                             | 285 |   |   |
| MFLA_0765 | hypothetical protein                                             | 289 |   |   |
| MFLA_1456 | hypothetical protein                                             | 290 |   |   |
| MFLA_0090 | hypothetical protein                                             | 303 |   |   |
| MFLA_2715 | hypothetical protein                                             | 323 |   |   |
| MFLA_2549 | hypothetical protein                                             | 351 |   |   |
| MFLA_2700 | hypothetical protein                                             | 478 |   |   |
| MFLA_0671 | hypothetical protein                                             | 492 |   |   |
| MFLA_2699 | hypothetical protein                                             | 514 |   |   |
| MFLA_0595 | hypothetical protein                                             | 580 |   | * |
| MFLA_0104 | hypothetical protein                                             | 597 |   |   |
| MFLA_1860 | hypothetical protein                                             | 621 |   | * |
| MFLA_0840 | Lip                                                              | 73  | * |   |
| MFLA_0616 | major membrane protein I                                         | 305 |   |   |
| MFLA_0689 | MxaA protein, putative                                           | 301 | * | * |
| MFLA_0656 | osmotically inducible lipoprotein                                | 70  | * | * |
| MFLA_2596 | proline-rich region                                              | 178 | * |   |
| MFLA_1154 | prophage LambdaMc01, site-specific recombinase, resolvase family | 104 |   |   |
| MFLA_1313 | putative integrase                                               | 172 |   |   |
| MFLA_2166 | putative lipoprotein                                             | 482 | * |   |



|           |                                                         |     |   |   |
|-----------|---------------------------------------------------------|-----|---|---|
| MFLA_0158 | putative N,N-dimethylformamidase                        | 777 |   |   |
| MFLA_2415 | putative prolin-rich transmembrane protein              | 200 | * |   |
| MFLA_0655 | putative signal transduction protein with EFhand domain | 184 | * |   |
| MFLA_0480 | putative transmembrane protein                          | 129 | * | * |
| MFLA_0478 | putative transmembrane protein                          | 119 |   |   |
| MFLA_0479 | putative transmembrane protein                          | 120 |   | * |
| MFLA_0077 | TPR repeat                                              | 390 |   |   |
| MFLA_1730 | transcriptional regulator (IMGterm)                     | 61  |   |   |
| MFLA_0963 | tRNA/rRNA methyltransferase (SpoU)                      | 53  |   |   |
| MFLA_1758 | uracil-DNA glycosylase                                  | 299 |   |   |
| MFLA_1900 | von Willebrand factor, type A                           | 321 | * | * |
| MFLA_1782 |                                                         | 130 |   |   |
| MFLA_0405 |                                                         | 170 |   |   |
