# Supplementary material
Source: PubMed Central journal article supplement (PMC2944507)
Supplement: supp_192_19_4859__6.pdf [file supp_192_19_4859__6.pdf]

**Supplementary File 6. Spectral count (S.c.) statistics for proteins involved in central metabolism of *Methylobacillus flagellatus***

| Gene name<br>(Mfla identifier)                           | Protein/ function                                 | S.c. ratio<br>MA/ Me (log2) | S.c. Sum<br>(log2) | Raw counts<br>MA | Raw counts<br>Me |
|----------------------------------------------------------|---------------------------------------------------|-----------------------------|--------------------|------------------|------------------|
| <b><i>Methanol oxidation</i></b>                         |                                                   |                             |                    |                  |                  |
| <i>mxoF</i> (mfla_2044)                                  | MDH large subunit                                 | 0.527                       | 12.931             | 2885             | 2837             |
| <i>mxoJ</i> (mfla_2043)                                  | essential for MDH function                        | 0.290                       | 9.510              | 252              | 297              |
| <i>mxoG</i> (mfla_2042)                                  | cytochrome, electron acceptor from MDH            | -0.622                      | 8.679              | 104              | 225              |
| <i>mxoI</i> (mfla_2041)                                  | MDH small subunit                                 | 2.365                       | 6.763              | 44               | 27               |
| <i>mxoR</i> (mfla_2040)                                  | unknown                                           | 0.181                       | 9.019              | 176              | 222              |
| <i>mxoS</i> (mfla_2039)                                  | unknown                                           | 1.882                       | 5.936              | 30               | 11               |
| <i>mxoA</i> (mfla_2038)                                  | essential for Ca <sup>2+</sup> insertion into MDH | 0.347                       | 6.590              | 35               | 39               |
| <i>mxoC</i> (mfla_2037)                                  | essential for Ca <sup>2+</sup> insertion into MDH | 1.057                       | 5.433              | 20               | 11               |
| <i>mxoK</i> (mfla_2036)                                  | essential for Ca <sup>2+</sup> insertion into MDH | -0.013                      | 5.537              | 14               | 21               |
| <i>mxoL</i> (mfla_2035)                                  | essential for Ca <sup>2+</sup> insertion into MDH | 1.402                       | 5.983              | 28               | 15               |
| <i>mxoD</i> (mfla_2034)                                  | unknown                                           | -1.144                      | 8.729              | 83               | 263              |
| <i>xoxF</i> (mfla_2314)                                  | MxaF homolog                                      | 1.724                       | 6.345              | 38               | 16               |
| <i>xoxJ</i> (mfla_2313)                                  | MxaJ homolog                                      | 0.639                       | 5.992              | 24               | 22               |
| <i>xoxG</i> (mfla_2312)                                  | MxaG homolog                                      | 0.733                       | 5.075              | 12               | 11               |
| <i>mfla_344</i>                                          | MxaF homolog                                      | 3.274                       | 3.763              | 7                | 1                |
| <i>mfla_1451</i>                                         | MxaF homolog                                      | -                           | -                  | -                | -                |
| <i>mfla_1450</i>                                         | MxaG homolog                                      | -                           | -                  | -                | -                |
| <i>mfla_1717</i>                                         | MxaF homolog                                      | 0.418                       | 3.776              | 4                | 6                |
| <b><i>Pyroloquinoline quinone (PQQ) biosynthesis</i></b> |                                                   |                             |                    |                  |                  |
| <i>pqqA</i> (mfla_0021)                                  | PQQ synthesis                                     | -                           | -                  | -                | -                |
| <i>pqqB</i> (mfla_1683)                                  | PQQ synthesis                                     | -0.836                      | 5.643              | 12               | 27               |
| <i>pqqC</i> (mfla_1682)                                  | PQQ synthesis                                     | -1.249                      | 7.653              | 43               | 120              |
| <i>pqqD</i> (mfla_1681)                                  | PQQ synthesis                                     | -0.577                      | 3.852              | 2                | 9                |
| <i>pqqE</i> (mfla_1680)                                  | PQQ synthesis                                     | 0.008                       | 5.437              | 13               | 19               |
| <i>pqqF</i> (mfla_0734)                                  | PQQ synthesis                                     | -0.099                      | 8.708              | 196              | 125              |

|                                                                       |                                            |        |        |      |     |
|-----------------------------------------------------------------------|--------------------------------------------|--------|--------|------|-----|
| <i>pqqG</i> ( <i>mfla_0735</i> )                                      | PQQ synthesis                              | 0.687  | 8.247  | 114  | 116 |
| <b><i>Methylamine oxidation (methylamine dehydrogenase, MADH)</i></b> |                                            |        |        |      |     |
| <i>mauF</i> ( <i>mfla_0547</i> )                                      | unknown                                    | -      | -      | -    | -   |
| <i>mauB</i> ( <i>mfla_0548</i> )                                      | MADH large subunit                         | 6.529  | 12.602 | 3830 | 59  |
| <i>mauE</i> ( <i>mfla_0549</i> )                                      | essential for small subunit maturation     | -      | 4.691  | 18   | -   |
| <i>mauD</i> ( <i>mfla_0550</i> )                                      | essential for small subunit maturation     | 6.716  | 10.047 | 671  | 5   |
| <i>mauA</i> ( <i>mfla_0551</i> )                                      | MADH small subunit                         | -      | 7.785  | 140  | -   |
| <i>mauG</i> ( <i>mfla_0552</i> )                                      | TTQ biosynthesis                           | -      | 7.524  | 115  | -   |
| <i>mauL</i> ( <i>mfla_0553</i> )                                      | unknown                                    | -      | -      | -    | -   |
| <i>mauM</i> ( <i>mfla_0554</i> )                                      | unknown                                    | -      | 5.720  | 31   | -   |
| <i>mauN</i> ( <i>mfla_0555</i> )                                      | unknown                                    | -      | 3.720  | 7    | -   |
| <i>azu</i> ( <i>mfla_0556</i> )                                       | electron acceptor from MADH                | 4.723  | 8.239  | 184  | 5   |
| <b><i>Methylamine oxidation (N-methylglutamate pathway)</i></b>       |                                            |        |        |      |     |
| <i>mgdA</i> ( <i>mfla_0452</i> )                                      | N-methylglutamate DH sub. A                | 5.132  | 8.427  | 19   | -   |
| <i>mgdB</i> ( <i>mfla_0453</i> )                                      | N-methylglutamate DH sub. B                | -      | 3.621  | 7    | -   |
| <i>mgdC</i> ( <i>mfla_0454</i> )                                      | N-methylglutamate DH sub. C                | 6.159  | 7.581  | 112  | 1   |
| <i>mgdD</i> ( <i>mfla_0455</i> )                                      | N-methylglutamate DH sub. D                | -      | 4.302  | 11   | -   |
| <i>gma</i> ( <i>mfla_0456</i> )                                       | $\gamma$ -glutamylmethylamide synthase     | 4.597  | 7.451  | 100  | 4   |
| <i>mgsA</i> ( <i>mfla_0457</i> )                                      | N-methylglutamate synthase sub. A          | 5.132  | 8.427  | 203  | 4   |
| <i>mgsB</i> ( <i>mfla_0458</i> )                                      | N-methylglutamate synthase sub. B          | -      | 6.812  | 65   | -   |
| <i>mgsC</i> ( <i>mfla_0459</i> )                                      | N-methylglutamate synthase sub. C          | 4.429  | 8.631  | 226  | 12  |
| <b><i>H<sub>4</sub>MPT-linked formaldehyde oxidation</i></b>          |                                            |        |        |      |     |
| <i>fhcB</i> ( <i>mfla_1662</i> )                                      | Fhc, subunit B                             | -0.140 | 8.467  | 106  | 171 |
| <i>fhcA</i> ( <i>mfla_1663</i> )                                      | Fhc, subunit A                             | 0.265  | 9.594  | 267  | 310 |
| <i>fhcD</i> ( <i>mfla_1664</i> )                                      | Fhc, subunit D                             | 0.163  | 8.426  | 114  | 148 |
| <i>fhcC</i> ( <i>mfla_1665</i> )                                      | Fhc, subunit C                             | 0.624  | 9.891  | 365  | 335 |
| <i>mptG</i> ( <i>mfla_1661</i> )                                      | $\beta$ -RFAP                              | -1.353 | 7.980  | 45   | 161 |
| <i>mtdB</i> ( <i>mfla_1660</i> )                                      | methylene H <sub>4</sub> MPT dehydrogenase | -0.352 | 10.703 | 460  | 848 |
| <i>orfY</i> ( <i>mfla_1659</i> )                                      | unknown                                    | 0.171  | 5.076  | 13   | 12  |

|                                                                             |                                            |        |        |      |      |
|-----------------------------------------------------------------------------|--------------------------------------------|--------|--------|------|------|
| <i>mch</i> ( <i>mfla_1658</i> )                                             | methenyl H <sub>4</sub> MPT cyclohydrolase | -0.888 | 10.018 | 234  | 620  |
| <i>orf5</i> ( <i>mfla_1657</i> )                                            | biosynthesis of H <sub>4</sub> MPT         | 1.856  | 3.354  | 4    | 3    |
| <i>orf7</i> ( <i>mfla_1656</i> )                                            | unknown                                    | -      | 2.095  | -    | 4    |
| <i>fae</i> ( <i>mfla_1652</i> )                                             | formaldehyde activating enzyme             | -0.380 | 11.077 | 590  | 1077 |
| <i>fae</i> ( <i>mfla_2543</i> )                                             | formaldehyde activating enzyme             | -0.725 | 4.872  | 7    | 16   |
| <i>orf17</i> ( <i>mfla_1651</i> )                                           | unknown                                    | -      | 2.095  | -    | 4    |
| <i>orf1</i> ( <i>mfla_1650</i> )                                            | unknown                                    | -      | 1.346  | -    | 2    |
| <i>orf9</i> ( <i>mfla_1649</i> )                                            | biosynthesis of H <sub>4</sub> MPT         | -0.399 | 6.288  | 22   | 39   |
| <i>pabB</i> ( <i>mfla_1648</i> )                                            | para-aminobenzoate synthase component I    | 0.016  | 5.928  | 19   | 27   |
| <i>pcbD</i> ( <i>mfla_1646</i> )                                            | unknown                                    | -0.749 | 5.732  | 12   | 29   |
| <i>orf21</i> ( <i>mfla_1647</i> )                                           | biosynthesis of H <sub>4</sub> MPT         | 0.580  | 7.216  | 57   | 47   |
| <i>orf22</i> ( <i>mfla_1579</i> )                                           | biosynthesis of H <sub>4</sub> MPT         | -1.153 | 2.996  | 1    | 6    |
| <i>orf19</i> ( <i>mfla_1580</i> )                                           | biosynthesis of H <sub>4</sub> MPT         | -      | 2.600  | 4    | -    |
| <i>orf20</i> ( <i>mfla_1581</i> )                                           | biosynthesis of H <sub>4</sub> MPT         | 1.440  | 4.765  | 12   | 6    |
| <i>afp</i> ( <i>mfla_1582</i> )                                             | dihydromethanopterin reductase             | -0.317 | 5.484  | 12   | 22   |
| <i>fae2</i> ( <i>mfla_1524</i> )                                            | formaldehyde activating enzyme homolog     | -1.629 | 10.146 | 176  | 766  |
| <i>fae3</i> ( <i>mfla_2364</i> )                                            | formaldehyde activating enzyme homolog     | -0.028 | 8.321  | 107  | 139  |
| <b>Formate oxidation</b>                                                    |                                            |        |        |      |      |
| <i>Fdh1A</i> ( <i>mfla_0720</i> )                                           | FDH1, dehydrogenase alpha subunit          | -      | 6.738  | 64   | -    |
| <i>Fdh1B</i> ( <i>mfla_0721</i> )                                           | FDH1, beta subunit                         | -      | 6.692  | 62   | -    |
| <i>Fdh1C</i> ( <i>mfla_0722</i> )                                           | FDH1, gamma subunit                        | -      | 1.398  | 1    | -    |
| <i>Fdh1D</i> ( <i>mfla_0719</i> )                                           | FDH1, accessory protein                    | -      | -      | -    | -    |
| <i>Fdh1E</i> ( <i>mfla_0718</i> )                                           | FDH1, delta subunit                        | -      | 2.621  | 3    | -    |
| <i>fdh4A</i> ( <i>mfla_0338</i> )                                           | FDH4                                       | 0.673  | 6.051  | 26   | 22   |
| <i>fdh4B</i> ( <i>mfla_0337</i> )                                           | FDH4-associated protein                    | -      | -      | -    | -    |
| <b>Ribulose monophosphate cycle for formaldehyde assimilation/oxidation</b> |                                            |        |        |      |      |
| <i>hps</i> ( <i>mfla_1654</i> )                                             | hexulosephosphate synthase                 | -0.548 | 12.329 | 1311 | 2728 |
| <i>hps</i> ( <i>mfla_0250</i> )                                             | hexulosephosphate synthase                 | -0.274 | 12.910 | 2194 | 3775 |
| <i>hpi</i> ( <i>mfla_1653</i> )                                             | hexulosephosphate isomerase                | -0.302 | 9.111  | 156  | 284  |
| <i>tal</i> ( <i>mfla_1655</i> )                                             | transaldolase                              | -0.380 | 11.077 | 823  | 1790 |
| <i>pgi</i> ( <i>mfla_1325</i> )                                             | glucose 6-phosphate isomerase              | -0.566 | 8.539  | 95   | 193  |
| <i>zwf</i> ( <i>mfla_0917/1061</i> )                                        | glucose 6-phosphate dehydrogenase          | 0.106  | 9.998  | 332  | 432  |

|                                       |                                            |        |        |      |      |
|---------------------------------------|--------------------------------------------|--------|--------|------|------|
| <i>pgl</i> ( <i>mfla_0919/1063</i> )  | 6-phosphogluconolactonase                  | -1.109 | 6.040  | 24   | 75   |
| <i>gndA</i> ( <i>mfla_0918/1062</i> ) | 6-phosphogluconate dehydrogenase (NAD)     | 0.173  | 10.690 | 617  | 648  |
| <i>gndB</i> ( <i>mfla_2599</i> )      | 6-phosphogluconate dehydrogenase (NADP)    | 3.393  | 7.128  | 78   | 10   |
| <i>edd</i> ( <i>mfla_0759</i> )       | 6-phosphogluconate dehydratase             | 0.271  | 8.752  | 147  | 172  |
| <i>eda</i> ( <i>mfla_0760</i> )       | 2-keto 3-deoxy 6-phosphogluconate aldolase | -0.371 | 8.239  | 82   | 153  |
| <i>tkt</i> ( <i>mfla_2249</i> )       | transketolase                              | -0.044 | 12.657 | 2082 | 2925 |
| <i>rpe</i> ( <i>mfla_2472</i> )       | ribulosephosphate 3-epimerase              | -0.472 | 9.959  | 264  | 516  |

### ***C3 interconversion reactions and partial citric acid cycle***

|                                  |                                        |        |        |     |     |
|----------------------------------|----------------------------------------|--------|--------|-----|-----|
| <i>aceE</i> ( <i>mfla_2074</i> ) | E1 component, pyruvate dehydrogenase   | -0.461 | 9.590  | 208 | 400 |
| <i>aceF</i> ( <i>mfla_2075</i> ) | E2 component, pyruvate dehydrogenase   | -0.189 | 8.038  | 77  | 123 |
| <i>lpdA</i> ( <i>mfla_2076</i> ) | E3 component, pyruvate dehydrogenase   | 0.018  | 7.477  | 57  | 81  |
| <i>pyk</i> ( <i>mfla_2244</i> )  | pyruvate kinase                        | 1.139  | 6.093  | 29  | 20  |
| <i>pgk</i> ( <i>mfla_2247</i> )  | phosphoglycerate kinase                | -0.716 | 7.783  | 52  | 124 |
| <i>gpd</i> ( <i>mfla_2248</i> )  | glyceraldehyde phosphate dehydrogenase | -0.262 | 78.550 | 107 | 183 |
| <i>pps</i> ( <i>mfla_2203</i> )  | PEP synthase                           | -0.522 | 10.770 | 463 | 911 |
| <i>pgm</i> ( <i>mfla_2188</i> )  | phosphoglyceromutase                   | -0.889 | 8.618  | 86  | 226 |
| <i>eno</i> ( <i>mfla_1909</i> )  | enolase                                | -1.035 | 10.294 | 269 | 756 |
| <i>tpi</i> ( <i>mfla_2064</i> )  | triosephosphate isomerase              | 0.857  | 4.064  | 4   | 8   |
| <i>acnB</i> ( <i>mfla_1817</i> ) | aconitate hydratase B                  | 0.015  | 9.193  | 189 | 259 |
| <i>gltA</i> ( <i>mfla_0061</i> ) | citrate synthase                       | -0.419 | 8.248  | 82  | 154 |
| <i>idh</i> ( <i>mfla_2139</i> )  | isocitrate dehydrogenase               | 0.345  | 9.509  | 257 | 284 |
| <i>sucC</i> ( <i>mfla_1888</i> ) | succinly-CoA sythase alpha subunit     | 0.742  | 7.852  | 91  | 72  |
| <i>sucD</i> ( <i>mfla_1889</i> ) | succinly-CoA sythase beta subunit      | -0.243 | 7.627  | 57  | 95  |

---

MA, methylamine; Me, methanol;  $\beta$ -RFAP,  $\beta$ -ribofuranosylaminobenzene 5'-phosphate synthase; FDH, formate dehydrogenase.
