# Supplementary material
Source: PubMed Central journal article supplement (PMC2944507)
Supplement: supp_192_19_4859__7.pdf [file supp_192_19_4859__7.pdf]

**Supplementary File 7. Activity of 6-phosphogluconate dehydrogenase in wild type *M. flagellatus* and FDH4A and GndA mutants**

|           | NAD (Methanol) | NAD (MA) | NADP (Methanol) | NADP (MA) |
|-----------|----------------|----------|-----------------|-----------|
| Wild type | 140            | 115      | 20              | 30        |
| FDH4A     | 120            | 140      | 15              | 50        |
| GndA      | NG             | 10       | NG              | 25        |

Activity is expressed in mU. Measurements from three independent experiments agreed within 30%. Methanol, grown on methanol; MA, grown on methylamine. NG, no growth.
